# Supplementary material for: Loss of NEDD8 in cancer cells causes vulnerability to immune checkpoint blockade in triple-negative breast cancer
Source: Nat Commun. 2024 Apr 27;15:3581. doi: 10.1038/s41467-024-47987-x (PMC11055868; doi:10.1038/s41467-024-47987-x)
Supplement: Supplementary file 4 — Supplementary Data 1 [file 41467_2024_47987_MOESM4_ESM.xlsx]

## Sheet: A. TICS donor 1
sgRNA	Gene	YM_MDA_alonel_1	YM_MDA_lymphocytes_Donor 1	YM_MDA_lymphocytes_Nivo_Donor 1
A1BG_1	A1BG	4184	3275	3556
A1BG_2	A1BG	993	1000	1266
A1BG_3	A1BG	1775	1523	1528
A1BG_4	A1BG	1312	823	844
A1CF_1	A1CF	2953	2856	3341
A1CF_2	A1CF	954	967	1101
A1CF_3	A1CF	2769	2496	2709
A1CF_4	A1CF	2639	2484	2410
A2M_1	A2M	1795	2154	2216
A2M_2	A2M	2987	2421	2643
A2M_3	A2M	4105	2880	2671
A2M_4	A2M	1879	1867	1914
A2ML1_1	A2ML1	1351	1496	1573
A2ML1_2	A2ML1	3854	3498	3678
A2ML1_3	A2ML1	1379	1237	1390
A2ML1_4	A2ML1	1661	1571	1839
A3GALT2_1	A3GALT2	2170	2529	3079
A3GALT2_2	A3GALT2	2052	1451	1465
A3GALT2_3	A3GALT2	3268	3371	3426
A3GALT2_4	A3GALT2	2881	2753	2559
A4GALT_1	A4GALT	3065	2680	2629
A4GALT_2	A4GALT	2704	2579	2491
A4GALT_3	A4GALT	3090	2556	3097
A4GALT_4	A4GALT	487	513	462
A4GNT_1	A4GNT	1733	1642	1729
A4GNT_2	A4GNT	4147	3610	4439
A4GNT_3	A4GNT	3765	3042	3556
A4GNT_4	A4GNT	454	576	431
AAAS_1	AAAS	1743	1387	1359
AAAS_2	AAAS	1702	1704	1847
AAAS_3	AAAS	2418	2191	2195
AAAS_4	AAAS	1767	1879	1699
AACS_1	AACS	1797	2082	2162
AACS_2	AACS	5267	4370	4827
AACS_3	AACS	4589	3424	3534
AACS_4	AACS	2930	2235	2931
AADAC_1	AADAC	2762	2902	3314
AADAC_2	AADAC	1898	1798	1965
AADAC_3	AADAC	1407	1383	1277
AADAC_4	AADAC	1448	1442	1386
AADACL2_1	AADACL2	1713	2543	2765
AADACL2_2	AADACL2	3552	3626	4143
AADACL2_3	AADACL2	1694	1520	1582
AADACL2_4	AADACL2	2658	2109	2573
AADACL3_1	AADACL3	2292	2167	2207
AADACL3_2	AADACL3	1582	1464	1548
AADACL3_3	AADACL3	2283	2159	2253
AADACL3_4	AADACL3	1503	1620	1798
AADACL4_1	AADACL4	1112	847	992
AADACL4_2	AADACL4	2739	2247	2059
AADACL4_3	AADACL4	3742	3096	3236
AADACL4_4	AADACL4	63	77	99
AADAT_1	AADAT	2063	1684	1853
AADAT_2	AADAT	3402	3284	3105
AADAT_3	AADAT	2812	2950	2889
AADAT_4	AADAT	1578	1541	1621
AAED1_1	AAED1	1787	1322	1372
AAED1_2	AAED1	3474	2755	2787
AAED1_3	AAED1	2642	2267	2348
AAED1_4	AAED1	692	490	588
AAGAB_1	AAGAB	4048	3709	4072
AAGAB_2	AAGAB	2641	2253	2425
AAGAB_3	AAGAB	2578	2458	2482
AAGAB_4	AAGAB	3030	3613	3872
AAK1_1	AAK1	3329	2800	2926
AAK1_2	AAK1	2228	1669	1815
AAK1_3	AAK1	1984	2279	2197
AAK1_4	AAK1	2543	2522	2380
AAMDC_1	AAMDC	1701	1765	1837
AAMDC_2	AAMDC	2484	1749	2066
AAMDC_3	AAMDC	2323	2433	2005
AAMDC_4	AAMDC	3010	2644	2659
AAMP_1	AAMP	995	950	1100
AAMP_2	AAMP	2845	2650	3299
AAMP_3	AAMP	864	861	988
AAMP_4	AAMP	714	874	666
AANAT_1	AANAT	2294	1875	1883
AANAT_2	AANAT	3191	2576	2454
AANAT_3	AANAT	2393	2203	2034
AANAT_4	AANAT	2429	2203	2200
AAR2_1	AAR2	1691	1492	1460
AAR2_2	AAR2	2213	1794	2124
AAR2_3	AAR2	1773	1381	1722
AAR2_4	AAR2	1709	1778	1629
AARD_1	AARD	3263	2552	2663
AARD_2	AARD	2412	2103	2256
AARD_3	AARD	1276	1511	1393
AARD_4	AARD	1020	1054	1095
AARS_1	AARS	1143	1216	1098
AARS_2	AARS	517	403	490
AARS_3	AARS	655	643	673
AARS_4	AARS	388	259	300
AARS2_1	AARS2	3747	3543	3567
AARS2_2	AARS2	2462	2575	2887
AARS2_3	AARS2	1725	1538	1678
AARS2_4	AARS2	1716	1881	1927
AARSD1_1	AARSD1	3230	2629	2684
AARSD1_2	AARSD1	1493	1377	1458
AARSD1_3	AARSD1	1119	1223	1266
AARSD1_4	AARSD1	3313	3223	3170
AASDH_1	AASDH	1714	1630	1749
AASDH_2	AASDH	2127	2233	2189
AASDH_3	AASDH	3595	2928	2939
AASDH_4	AASDH	2083	1776	1735
AASDHPPT_1	AASDHPPT	2366	2166	2666
AASDHPPT_2	AASDHPPT	986	977	1008
AASDHPPT_3	AASDHPPT	2022	1906	2205
AASDHPPT_4	AASDHPPT	2196	2067	2241
AASS_1	AASS	1513	2078	2351
AASS_2	AASS	4127	4396	4317
AASS_3	AASS	1989	1813	1825
AASS_4	AASS	2909	2343	2584
AATF_1	AATF	2438	2227	2768
AATF_2	AATF	931	1421	1501
AATF_3	AATF	1158	1183	1147
AATF_4	AATF	1493	1551	1936
AATK_1	AATK	2501	2524	3053
AATK_2	AATK	613	616	663
AATK_3	AATK	2193	1678	1776
AATK_4	AATK	2039	2105	1980
ABAT_1	ABAT	2499	2263	2133
ABAT_2	ABAT	7954	7185	8018
ABAT_3	ABAT	3969	3221	3136
ABAT_4	ABAT	2718	2896	3422
ABCA1_1	ABCA1	1259	1218	1508
ABCA1_2	ABCA1	647	663	604
ABCA1_3	ABCA1	1873	1518	1454
ABCA1_4	ABCA1	2177	2163	2294
ABCA10_1	ABCA10	2388	2665	2764
ABCA10_2	ABCA10	2668	2066	2198
ABCA10_3	ABCA10	833	919	966
ABCA10_4	ABCA10	190	113	140
ABCA12_1	ABCA12	2266	2086	2377
ABCA12_2	ABCA12	1244	1202	1140
ABCA12_3	ABCA12	1159	1308	1226
ABCA12_4	ABCA12	2479	1752	2264
ABCA13_1	ABCA13	1973	1847	1842
ABCA13_2	ABCA13	3970	3963	4052
ABCA13_3	ABCA13	2591	2314	2623
ABCA13_4	ABCA13	1832	1830	1991
ABCA2_1	ABCA2	3108	2754	2823
ABCA2_2	ABCA2	231	308	338
ABCA2_3	ABCA2	3165	2674	2840
ABCA2_4	ABCA2	3223	2778	2903
ABCA3_1	ABCA3	1805	1457	1485
ABCA3_2	ABCA3	1992	1471	1934
ABCA3_3	ABCA3	3143	2553	2849
ABCA3_4	ABCA3	2523	1985	2281
ABCA4_1	ABCA4	2050	2145	2561
ABCA4_2	ABCA4	2394	2322	2530
ABCA4_3	ABCA4	254	213	270
ABCA4_4	ABCA4	2547	2281	2533
ABCA5_1	ABCA5	2414	2379	2861
ABCA5_2	ABCA5	1963	1942	2140
ABCA5_3	ABCA5	546	448	522
ABCA5_4	ABCA5	2383	1901	1994
ABCA6_1	ABCA6	3711	2531	2744
ABCA6_2	ABCA6	5053	3397	3869
ABCA6_3	ABCA6	3185	2922	2946
ABCA6_4	ABCA6	1893	1913	2098
ABCA7_1	ABCA7	2059	1945	2067
ABCA7_2	ABCA7	2544	2385	3159
ABCA7_3	ABCA7	2521	1834	2069
ABCA7_4	ABCA7	1575	1431	1446
ABCA8_1	ABCA8	1996	1926	1996
ABCA8_2	ABCA8	2708	2744	2401
ABCA8_3	ABCA8	3282	3245	3540
ABCA8_4	ABCA8	2878	2903	2606
ABCA9_1	ABCA9	1226	1232	1643
ABCA9_2	ABCA9	2421	2051	2136
ABCA9_3	ABCA9	2887	2107	2272
ABCA9_4	ABCA9	1350	1346	1574
ABCB1_1	ABCB1	2719	2748	2723
ABCB1_2	ABCB1	5219	5041	5298
ABCB1_3	ABCB1	1467	1294	1472
ABCB1_4	ABCB1	1211	1060	1178
ABCB10_1	ABCB10	3953	3466	4265
ABCB10_2	ABCB10	957	782	674
ABCB10_3	ABCB10	1469	1333	1601
ABCB10_4	ABCB10	1646	1487	1270
ABCB11_1	ABCB11	2233	2183	2637
ABCB11_2	ABCB11	1620	1583	1851
ABCB11_3	ABCB11	4619	4303	4269
ABCB11_4	ABCB11	788	757	712
ABCB4_1	ABCB4	3537	3363	3646
ABCB4_2	ABCB4	977	795	891
ABCB4_3	ABCB4	390	302	281
ABCB4_4	ABCB4	1743	1475	1781
ABCB5_1	ABCB5	2088	2140	2075
ABCB5_2	ABCB5	3115	2681	3008
ABCB5_3	ABCB5	1821	1732	1854
ABCB5_4	ABCB5	3463	2597	2732
ABCB6_1	ABCB6	2400	2291	2143
ABCB6_2	ABCB6	2621	2547	2895
ABCB6_3	ABCB6	1819	1829	1856
ABCB6_4	ABCB6	2491	2541	2709
ABCB7_1	ABCB7	2094	1861	2401
ABCB7_2	ABCB7	1454	1439	1403
ABCB7_3	ABCB7	1814	1589	2014
ABCB7_4	ABCB7	914	1054	878
ABCB8_1	ABCB8	1358	1161	1190
ABCB8_2	ABCB8	1956	1667	1548
ABCB8_3	ABCB8	2642	2460	2614
ABCB8_4	ABCB8	1282	1389	1671
ABCB9_1	ABCB9	2163	1664	1823
ABCB9_2	ABCB9	1317	1192	1429
ABCB9_3	ABCB9	1085	1087	1177
ABCB9_4	ABCB9	1380	1464	1412
ABCC1_1	ABCC1	1755	1470	1813
ABCC1_2	ABCC1	2081	2085	2464
ABCC1_3	ABCC1	1697	1631	1990
ABCC1_4	ABCC1	732	758	809
ABCC10_1	ABCC10	403	373	351
ABCC10_2	ABCC10	1978	1780	1947
ABCC10_3	ABCC10	2077	1719	1918
ABCC10_4	ABCC10	1327	1274	1629
ABCC11_1	ABCC11	2105	1664	1622
ABCC11_2	ABCC11	752	735	986
ABCC11_3	ABCC11	2764	2224	2526
ABCC11_4	ABCC11	1539	1527	1636
ABCC12_1	ABCC12	1645	1503	1840
ABCC12_2	ABCC12	1503	1700	1786
ABCC12_3	ABCC12	2263	1872	2197
ABCC12_4	ABCC12	2604	2314	2962
ABCC2_1	ABCC2	3789	3294	3466
ABCC2_2	ABCC2	2108	2290	2258
ABCC2_3	ABCC2	2102	1981	1720
ABCC2_4	ABCC2	2211	1596	1790
ABCC3_1	ABCC3	3337	2848	2878
ABCC3_2	ABCC3	1779	1707	1826
ABCC3_3	ABCC3	2279	2199	2326
ABCC3_4	ABCC3	1406	1563	1760
ABCC4_1	ABCC4	3531	3254	3599
ABCC4_2	ABCC4	3966	3088	3086
ABCC4_3	ABCC4	3045	3008	2942
ABCC4_4	ABCC4	2274	2021	1867
ABCC5_1	ABCC5	3170	3045	3245
ABCC5_2	ABCC5	1817	1709	1904
ABCC5_3	ABCC5	1428	1621	2055
ABCC5_4	ABCC5	1518	1363	1690
ABCC6_1	ABCC6	3762	3232	3732
ABCC6_2	ABCC6	1762	2081	1780
ABCC6_3	ABCC6	2033	2182	2128
ABCC6_4	ABCC6	4459	3912	3827
ABCC8_1	ABCC8	6535	5509	5999
ABCC8_2	ABCC8	3339	3535	3663
ABCC8_3	ABCC8	2965	2272	2310
ABCC8_4	ABCC8	3659	3823	3740
ABCC9_1	ABCC9	1593	1984	2106
ABCC9_2	ABCC9	1538	1460	1763
ABCC9_3	ABCC9	3231	2581	2765
ABCC9_4	ABCC9	2432	2121	2133
ABCD1_1	ABCD1	1436	1216	1302
ABCD1_2	ABCD1	2816	2650	2792
ABCD1_3	ABCD1	3941	4037	3541
ABCD1_4	ABCD1	2631	2022	2445
ABCD2_1	ABCD2	2562	2419	2577
ABCD2_2	ABCD2	1662	1394	1674
ABCD2_3	ABCD2	1578	1352	1462
ABCD2_4	ABCD2	5506	5166	5542
ABCD3_1	ABCD3	1720	1483	1594
ABCD3_2	ABCD3	1817	1674	1922
ABCD3_3	ABCD3	3244	2902	3037
ABCD3_4	ABCD3	1835	1549	1458
ABCD4_1	ABCD4	2585	2494	2695
ABCD4_2	ABCD4	3424	2773	3175
ABCD4_3	ABCD4	1172	1298	1183
ABCD4_4	ABCD4	757	687	842
ABCE1_1	ABCE1	822	556	658
ABCE1_2	ABCE1	566	444	485
ABCE1_3	ABCE1	942	913	952
ABCE1_4	ABCE1	722	687	528
ABCF1_1	ABCF1	1183	978	881
ABCF1_2	ABCF1	881	876	1157
ABCF1_3	ABCF1	951	1035	985
ABCF1_4	ABCF1	529	581	574
ABCF2_1	ABCF2	1962	1832	1688
ABCF2_2	ABCF2	3503	2932	3119
ABCF2_3	ABCF2	2489	2564	2319
ABCF2_4	ABCF2	1895	1887	2146
ABCF3_1	ABCF3	2282	2311	2345
ABCF3_2	ABCF3	2932	1915	2223
ABCF3_3	ABCF3	1298	1161	1120
ABCF3_4	ABCF3	888	946	837
ABCG1_1	ABCG1	2536	3060	3114
ABCG1_2	ABCG1	1686	2298	2315
ABCG1_3	ABCG1	144	138	230
ABCG1_4	ABCG1	3377	2764	2880
ABCG2_1	ABCG2	1202	1359	1669
ABCG2_2	ABCG2	1650	1324	1387
ABCG2_3	ABCG2	2941	2549	2867
ABCG2_4	ABCG2	1787	1822	1965
ABCG4_1	ABCG4	3973	3627	3873
ABCG4_2	ABCG4	1565	892	1110
ABCG4_3	ABCG4	845	789	689
ABCG4_4	ABCG4	2596	2044	2154
ABCG5_1	ABCG5	2229	2675	3106
ABCG5_2	ABCG5	1574	1620	1576
ABCG5_3	ABCG5	1038	994	1075
ABCG5_4	ABCG5	3297	2787	2833
ABCG8_1	ABCG8	2799	2570	2609
ABCG8_2	ABCG8	1425	1140	1073
ABCG8_3	ABCG8	1808	1960	2541
ABCG8_4	ABCG8	1776	1686	1829
ABHD1_1	ABHD1	1312	1430	1375
ABHD1_2	ABHD1	471	271	308
ABHD1_3	ABHD1	1094	1114	940
ABHD1_4	ABHD1	2162	2067	2185
ABHD10_1	ABHD10	2819	2233	2235
ABHD10_2	ABHD10	1383	1189	1294
ABHD10_3	ABHD10	1657	1870	1657
ABHD10_4	ABHD10	1965	1652	1546
ABHD11_1	ABHD11	1599	1281	1933
ABHD11_2	ABHD11	3062	2710	2914
ABHD11_3	ABHD11	1120	1390	1533
ABHD11_4	ABHD11	2607	2569	2757
ABHD12_1	ABHD12	2932	2452	2542
ABHD12_2	ABHD12	1601	1380	1497
ABHD12_3	ABHD12	2189	1711	1978
ABHD12_4	ABHD12	2162	1971	2222
ABHD12B_1	ABHD12B	2014	1670	1911
ABHD12B_2	ABHD12B	2506	2005	2023
ABHD12B_3	ABHD12B	1671	1407	1330
ABHD12B_4	ABHD12B	1768	1297	1390
ABHD13_1	ABHD13	2644	2626	2699
ABHD13_2	ABHD13	1903	1780	2062
ABHD13_3	ABHD13	2735	2374	2518
ABHD13_4	ABHD13	1739	1715	1698
ABHD14A_1	ABHD14A	1405	1905	2004
ABHD14A_2	ABHD14A	1734	1725	1726
ABHD14A_3	ABHD14A	1630	1191	1381
ABHD14A_4	ABHD14A	709	796	720
ABHD14B_1	ABHD14B	1365	1859	1945
ABHD14B_2	ABHD14B	783	777	863
ABHD14B_3	ABHD14B	1871	1952	2009
ABHD14B_4	ABHD14B	3116	2779	2818
ABHD15_1	ABHD15	3591	3186	3468
ABHD15_2	ABHD15	777	981	1027
ABHD15_3	ABHD15	2114	2070	2092
ABHD15_4	ABHD15	3029	2967	3128
ABHD16A_1	ABHD16A	3009	2089	2401
ABHD16A_2	ABHD16A	1578	1271	1414
ABHD16A_3	ABHD16A	2381	2290	2045
ABHD16A_4	ABHD16A	2888	2738	2722
ABHD16B_1	ABHD16B	5496	5029	4874
ABHD16B_2	ABHD16B	3114	2807	3147
ABHD16B_3	ABHD16B	2891	2598	2942
ABHD16B_4	ABHD16B	924	648	622
ABHD17A_1	ABHD17A	619	532	465
ABHD17A_2	ABHD17A	710	882	998
ABHD17A_3	ABHD17A	1394	1047	1279
ABHD17A_4	ABHD17A	639	678	728
ABHD17B_1	ABHD17B	2588	2236	2406
ABHD17B_2	ABHD17B	1039	1041	1034
ABHD17B_3	ABHD17B	1779	1709	1746
ABHD17B_4	ABHD17B	918	1227	1112
ABHD17C_1	ABHD17C	2419	2835	2910
ABHD17C_2	ABHD17C	2547	2260	2270
ABHD17C_3	ABHD17C	3477	3713	3701
ABHD17C_4	ABHD17C	120	125	99
ABHD2_1	ABHD2	2933	2214	2763
ABHD2_2	ABHD2	1035	754	988
ABHD2_3	ABHD2	1443	1246	1499
ABHD2_4	ABHD2	659	697	772
ABHD3_1	ABHD3	4422	3370	4108
ABHD3_2	ABHD3	904	960	1106
ABHD3_3	ABHD3	2569	2855	2727
ABHD3_4	ABHD3	1410	1375	1446
ABHD4_1	ABHD4	1532	1507	1421
ABHD4_2	ABHD4	1942	1803	2096
ABHD4_3	ABHD4	3089	2359	2707
ABHD4_4	ABHD4	2319	1706	1864
ABHD5_1	ABHD5	1168	1187	1342
ABHD5_2	ABHD5	3043	2621	2853
ABHD5_3	ABHD5	1316	1238	1474
ABHD5_4	ABHD5	710	688	713
ABHD6_1	ABHD6	2144	1973	2203
ABHD6_2	ABHD6	1383	1331	1306
ABHD6_3	ABHD6	2440	2587	2712
ABHD6_4	ABHD6	1992	1884	2229
ABHD8_1	ABHD8	722	954	903
ABHD8_2	ABHD8	2616	2059	2467
ABHD8_3	ABHD8	3220	3076	3445
ABHD8_4	ABHD8	793	641	681
ABI1_1	ABI1	2542	2672	2985
ABI1_2	ABI1	2286	2254	2623
ABI1_3	ABI1	1342	1196	1262
ABI1_4	ABI1	2593	2107	2330
ABI2_1	ABI2	921	982	909
ABI2_2	ABI2	4158	3440	3910
ABI2_3	ABI2	3525	2937	3238
ABI2_4	ABI2	1095	1225	1070
ABI3_1	ABI3	1573	1467	1356
ABI3_2	ABI3	2213	1785	1857
ABI3_3	ABI3	2372	1745	1705
ABI3_4	ABI3	1279	1337	1234
ABI3BP_1	ABI3BP	931	781	832
ABI3BP_2	ABI3BP	997	875	1063
ABI3BP_3	ABI3BP	529	438	419
ABI3BP_4	ABI3BP	955	813	898
ABL1_1	ABL1	2676	2813	2513
ABL1_2	ABL1	1854	1936	1973
ABL1_3	ABL1	770	816	753
ABL1_4	ABL1	1422	1532	1630
ABL2_1	ABL2	2618	2988	2887
ABL2_2	ABL2	1735	1925	1951
ABL2_3	ABL2	2230	2047	1970
ABL2_4	ABL2	2609	2348	2378
ABLIM1_1	ABLIM1	1910	1881	1800
ABLIM1_2	ABLIM1	2207	2061	2281
ABLIM1_3	ABLIM1	572	643	532
ABLIM1_4	ABLIM1	1180	1324	1420
ABLIM2_1	ABLIM2	1314	1390	1267
ABLIM2_2	ABLIM2	2253	2311	2308
ABLIM2_3	ABLIM2	1888	1574	1634
ABLIM2_4	ABLIM2	1972	1624	1737
ABLIM3_1	ABLIM3	4054	3477	4012
ABLIM3_2	ABLIM3	1564	1510	1580
ABLIM3_3	ABLIM3	4088	3665	4038
ABLIM3_4	ABLIM3	2823	2293	2447
ABO_1	ABO	2313	2360	2564
ABO_2	ABO	1180	1206	1086
ABO_3	ABO	1007	982	994
ABO_4	ABO	2095	1799	2180
ABR_1	ABR	2124	2283	2557
ABR_2	ABR	3633	4084	3658
ABR_3	ABR	1744	1967	2051
ABR_4	ABR	1154	1441	1372
ABRA_1	ABRA	541	622	645
ABRA_2	ABRA	780	651	761
ABRA_3	ABRA	1011	919	892
ABRA_4	ABRA	2482	2117	2226
ABRACL_1	ABRACL	1736	1545	1958
ABRACL_2	ABRACL	2363	1812	2292
ABRACL_3	ABRACL	1555	1396	1578
ABRACL_4	ABRACL	3189	2724	2864
ABT1_1	ABT1	713	999	789
ABT1_2	ABT1	929	1038	1019
ABT1_3	ABT1	235	413	372
ABT1_4	ABT1	1238	1161	994
ABTB1_1	ABTB1	1253	1474	1351
ABTB1_2	ABTB1	2475	2295	2232
ABTB1_3	ABTB1	2650	1980	2035
ABTB1_4	ABTB1	929	777	736
ABTB2_1	ABTB2	2847	2062	2338
ABTB2_2	ABTB2	4160	4190	4059
ABTB2_3	ABTB2	1916	1520	1539
ABTB2_4	ABTB2	2284	2024	2389
ACAA1_1	ACAA1	2801	2568	2893
ACAA1_2	ACAA1	2430	2216	2289
ACAA1_3	ACAA1	2291	1617	1713
ACAA1_4	ACAA1	111	80	95
ACAA2_1	ACAA2	1820	1503	1994
ACAA2_2	ACAA2	3122	2580	3002
ACAA2_3	ACAA2	1846	1516	1501
ACAA2_4	ACAA2	1349	1205	1364
ACACA_1	ACACA	1777	1561	1395
ACACA_2	ACACA	1839	2143	1970
ACACA_3	ACACA	953	1309	1270
ACACA_4	ACACA	1159	1186	1420
ACACB_1	ACACB	1449	1711	1764
ACACB_2	ACACB	1901	2545	2502
ACACB_3	ACACB	2989	3014	3161
ACACB_4	ACACB	1070	1009	971
ACAD10_1	ACAD10	1907	1636	1517
ACAD10_2	ACAD10	1193	1018	1287
ACAD10_3	ACAD10	2388	1971	1816
ACAD10_4	ACAD10	1524	1159	1185
ACAD11_1	ACAD11	4254	3443	3165
ACAD11_2	ACAD11	1402	1349	1408
ACAD11_3	ACAD11	1930	1486	1645
ACAD11_4	ACAD11	1075	856	1063
ACAD8_1	ACAD8	2135	1967	2011
ACAD8_2	ACAD8	2288	2193	2635
ACAD8_3	ACAD8	1112	1062	1090
ACAD8_4	ACAD8	2369	1899	2400
ACAD9_1	ACAD9	8189	7038	7233
ACAD9_2	ACAD9	1801	1553	1720
ACAD9_3	ACAD9	2150	1946	2227
ACAD9_4	ACAD9	1948	1885	2224
ACADL_1	ACADL	3465	3655	4014
ACADL_2	ACADL	2718	2200	2297
ACADL_3	ACADL	3265	2958	3041
ACADL_4	ACADL	2072	2360	2216
ACADM_1	ACADM	2472	2371	3214
ACADM_2	ACADM	2802	2452	2450
ACADM_3	ACADM	2360	1804	2021
ACADM_4	ACADM	3166	2631	2792
ACADS_1	ACADS	4337	3473	3836
ACADS_2	ACADS	1323	975	814
ACADS_3	ACADS	2040	1668	1700
ACADS_4	ACADS	2315	1857	2101
ACADSB_1	ACADSB	4303	3865	4162
ACADSB_2	ACADSB	2693	2475	2676
ACADSB_3	ACADSB	2045	2213	2152
ACADSB_4	ACADSB	1237	1471	1309
ACADVL_1	ACADVL	4112	3406	3780
ACADVL_2	ACADVL	1717	1561	1940
ACADVL_3	ACADVL	2276	2298	2434
ACADVL_4	ACADVL	275	226	330
ACAN_1	ACAN	4562	3781	3575
ACAN_2	ACAN	2731	2492	2539
ACAN_3	ACAN	2925	3517	3425
ACAN_4	ACAN	2326	1704	1979
ACAP1_1	ACAP1	1845	1638	1975
ACAP1_2	ACAP1	4041	3693	3628
ACAP1_3	ACAP1	2062	2130	1919
ACAP1_4	ACAP1	3611	3174	3290
ACAP2_1	ACAP2	2301	2111	2232
ACAP2_2	ACAP2	1258	1427	1655
ACAP2_3	ACAP2	1412	1054	1168
ACAP2_4	ACAP2	3632	4238	4297
ACAP3_1	ACAP3	3417	3003	2909
ACAP3_2	ACAP3	2597	1983	2100
ACAP3_3	ACAP3	3420	3229	3985
ACAP3_4	ACAP3	2078	1788	2082
ACAT1_1	ACAT1	3840	4110	5018
ACAT1_2	ACAT1	1874	2021	2344
ACAT1_3	ACAT1	1865	1557	1916
ACAT1_4	ACAT1	2516	2523	2107
ACAT2_1	ACAT2	1456	1154	1247
ACAT2_2	ACAT2	2305	1910	2028
ACAT2_3	ACAT2	2643	2523	2433
ACAT2_4	ACAT2	1321	1232	1220
ACBD3_1	ACBD3	2774	2984	3509
ACBD3_2	ACBD3	3059	3302	3574
ACBD3_3	ACBD3	2251	2139	2491
ACBD3_4	ACBD3	350	307	314
ACBD4_1	ACBD4	2423	2385	2086
ACBD4_2	ACBD4	3257	2591	2519
ACBD4_3	ACBD4	1957	2541	2839
ACBD4_4	ACBD4	2540	2064	1951
ACBD5_1	ACBD5	1657	1761	1719
ACBD5_2	ACBD5	3323	2943	3219
ACBD5_3	ACBD5	1557	1413	1526
ACBD5_4	ACBD5	1531	1873	1703
ACBD6_1	ACBD6	2652	2659	2994
ACBD6_2	ACBD6	3238	3673	3482
ACBD6_3	ACBD6	1734	1646	1588
ACBD6_4	ACBD6	864	1224	1362
ACBD7_1	ACBD7	2882	2935	3471
ACBD7_2	ACBD7	2421	2326	2735
ACBD7_3	ACBD7	1140	1807	2004
ACBD7_4	ACBD7	2284	1997	2628
ACCS_1	ACCS	3796	3417	3523
ACCS_2	ACCS	2888	1871	2160
ACCS_3	ACCS	533	502	401
ACCS_4	ACCS	2608	2209	2527
ACCSL_1	ACCSL	3455	3426	3681
ACCSL_2	ACCSL	4245	4005	3957
ACCSL_3	ACCSL	716	532	408
ACCSL_4	ACCSL	1892	1501	1910
ACD_1	ACD	2458	2298	2350
ACD_2	ACD	1976	1570	1892
ACD_3	ACD	1428	1322	1369
ACD_4	ACD	1088	1201	1392
ACE_1	ACE	2327	2403	2496
ACE_2	ACE	3725	3126	3598
ACE_3	ACE	1561	1530	1686
ACE_4	ACE	235	188	281
ACE2_1	ACE2	4339	3552	3542
ACE2_2	ACE2	3392	3212	3136
ACE2_3	ACE2	1075	917	805
ACE2_4	ACE2	2527	2598	2777
ACER1_1	ACER1	1198	1491	1405
ACER1_2	ACER1	1990	1709	1794
ACER1_3	ACER1	1846	1670	1818
ACER1_4	ACER1	2441	1950	1849
ACER2_1	ACER2	1625	1577	1786
ACER2_2	ACER2	2714	2476	2662
ACER2_3	ACER2	2257	2104	2825
ACER2_4	ACER2	2909	2900	2744
ACER3_1	ACER3	1968	2979	3319
ACER3_2	ACER3	2448	2036	1866
ACER3_3	ACER3	1656	1828	1866
ACER3_4	ACER3	1244	1387	1551
ACHE_1	ACHE	1167	1362	1345
ACHE_2	ACHE	1898	1665	1725
ACHE_3	ACHE	1611	1581	1649
ACHE_4	ACHE	2845	2267	2418
ACIN1_1	ACIN1	1190	1198	1319
ACIN1_2	ACIN1	3600	3024	3035
ACIN1_3	ACIN1	1755	1693	1711
ACIN1_4	ACIN1	1639	2432	2364
ACKR1_1	ACKR1	1558	1346	1320
ACKR1_2	ACKR1	2535	2988	3284
ACKR1_3	ACKR1	4401	3984	3806
ACKR1_4	ACKR1	2838	2912	2996
ACKR2_1	ACKR2	6096	5290	5326
ACKR2_2	ACKR2	3908	3360	3149
ACKR2_3	ACKR2	1915	2021	2120
ACKR2_4	ACKR2	929	801	755
ACKR3_1	ACKR3	2672	3409	3729
ACKR3_2	ACKR3	3490	3847	4064
ACKR3_3	ACKR3	6755	5549	6200
ACKR3_4	ACKR3	3452	2486	2976
ACKR4_1	ACKR4	1635	1414	1607
ACKR4_2	ACKR4	1704	1390	1373
ACKR4_3	ACKR4	3521	3297	3747
ACKR4_4	ACKR4	3595	3360	3701
ACLY_1	ACLY	1780	1759	1421
ACLY_2	ACLY	2534	2446	2203
ACLY_3	ACLY	3884	3123	3413
ACLY_4	ACLY	733	697	557
ACMSD_1	ACMSD	1273	1123	1174
ACMSD_2	ACMSD	1296	1094	1075
ACMSD_3	ACMSD	1938	1733	1649
ACMSD_4	ACMSD	2268	2131	2393
ACO1_1	ACO1	1964	2418	2275
ACO1_2	ACO1	775	768	726
ACO1_3	ACO1	2345	2465	2399
ACO1_4	ACO1	2110	1802	1953
ACO2_1	ACO2	1149	1022	915
ACO2_2	ACO2	666	734	601
ACO2_3	ACO2	1402	1249	1551
ACO2_4	ACO2	643	705	450
ACOT1_1	ACOT1	1277	1470	1603
ACOT1_2	ACOT1	2627	2594	2942
ACOT1_3	ACOT1	3920	3742	3783
ACOT1_4	ACOT1	1651	2175	2176
ACOT11_1	ACOT11	2089	1684	1787
ACOT11_2	ACOT11	691	642	538
ACOT11_3	ACOT11	3466	2336	2501
ACOT11_4	ACOT11	829	909	1033
ACOT12_1	ACOT12	2862	2601	2780
ACOT12_2	ACOT12	3364	3004	3214
ACOT12_3	ACOT12	2038	2056	2142
ACOT12_4	ACOT12	1352	1584	1526
ACOT13_1	ACOT13	2462	1972	2043
ACOT13_2	ACOT13	1569	1390	1405
ACOT13_3	ACOT13	1772	1454	1281
ACOT13_4	ACOT13	2269	2020	1962
ACOT2_1	ACOT2	2598	2186	2630
ACOT2_2	ACOT2	3222	2963	2797
ACOT2_3	ACOT2	2221	2120	2166
ACOT2_4	ACOT2	1408	1105	1102
ACOT4_1	ACOT4	1633	1720	1955
ACOT4_2	ACOT4	2846	2759	3057
ACOT4_3	ACOT4	2453	2271	2544
ACOT4_4	ACOT4	3157	3065	2685
ACOT6_1	ACOT6	2556	2455	2730
ACOT6_2	ACOT6	1951	1346	1555
ACOT6_3	ACOT6	2093	1991	2302
ACOT6_4	ACOT6	1960	1745	2006
ACOT7_1	ACOT7	2231	2521	2526
ACOT7_2	ACOT7	2123	2074	2173
ACOT7_3	ACOT7	3054	2477	2601
ACOT7_4	ACOT7	2086	2029	2175
ACOT8_1	ACOT8	1638	1025	1280
ACOT8_2	ACOT8	2870	2340	2763
ACOT8_3	ACOT8	1180	1226	1492
ACOT8_4	ACOT8	2957	2543	2751
ACOT9_1	ACOT9	2563	3093	3494
ACOT9_2	ACOT9	4985	4110	4696
ACOT9_3	ACOT9	3395	3188	3749
ACOT9_4	ACOT9	2317	2154	2249
ACOX1_1	ACOX1	1649	1436	1588
ACOX1_2	ACOX1	1164	1112	1066
ACOX1_3	ACOX1	183	261	214
ACOX1_4	ACOX1	2425	2166	2432
ACOX2_1	ACOX2	5206	4849	5435
ACOX2_2	ACOX2	1608	1574	1572
ACOX2_3	ACOX2	2118	1901	2399
ACOX2_4	ACOX2	1693	1671	1765
ACOX3_1	ACOX3	2613	2494	2485
ACOX3_2	ACOX3	3165	2917	3056
ACOX3_3	ACOX3	3224	2724	3077
ACOX3_4	ACOX3	2786	2796	2894
ACOXL_1	ACOXL	2254	2558	2448
ACOXL_2	ACOXL	1839	1784	1656
ACOXL_3	ACOXL	1513	1432	1638
ACOXL_4	ACOXL	1216	1322	1188
ACP1_1	ACP1	2570	2482	2443
ACP1_2	ACP1	4602	4146	4631
ACP1_3	ACP1	1693	1958	2160
ACP1_4	ACP1	1979	1785	2202
ACP2_1	ACP2	1199	1052	1023
ACP2_2	ACP2	2837	2557	2665
ACP2_3	ACP2	3494	2845	3238
ACP2_4	ACP2	1460	1505	1605
ACP5_1	ACP5	1463	1518	1414
ACP5_2	ACP5	3832	3381	3760
ACP5_3	ACP5	1982	1959	1840
ACP5_4	ACP5	1450	1654	1435
ACP6_1	ACP6	1412	1445	1549
ACP6_2	ACP6	3810	2918	3119
ACP6_3	ACP6	1569	1372	1313
ACP6_4	ACP6	667	480	453
ACPP_1	ACPP	2920	2520	2402
ACPP_2	ACPP	2523	2127	2464
ACPP_3	ACPP	5646	5025	5254
ACPP_4	ACPP	1799	1390	1445
ACPT_1	ACPT	2991	3121	3060
ACPT_2	ACPT	3306	3116	3143
ACPT_3	ACPT	1553	1344	1668
ACPT_4	ACPT	1737	1716	1900
ACR_1	ACR	1574	1873	1754
ACR_2	ACR	4307	3812	3426
ACR_3	ACR	1808	2364	2714
ACR_4	ACR	2965	2868	3053
ACRBP_1	ACRBP	411	464	505
ACRBP_2	ACRBP	3198	2790	3095
ACRBP_3	ACRBP	2116	1908	2343
ACRBP_4	ACRBP	2320	2075	2202
ACRC_1	ACRC	1740	2150	2359
ACRC_2	ACRC	3967	3182	3454
ACRC_3	ACRC	3517	3192	3492
ACRC_4	ACRC	819	777	722
ACRV1_1	ACRV1	5966	5055	5599
ACRV1_2	ACRV1	3226	2559	2971
ACRV1_3	ACRV1	3499	3036	3069
ACRV1_4	ACRV1	1644	1644	1930
ACSBG1_1	ACSBG1	1499	1691	1674
ACSBG1_2	ACSBG1	1095	1574	1702
ACSBG1_3	ACSBG1	1873	2305	2271
ACSBG1_4	ACSBG1	2026	1872	1849
ACSBG2_1	ACSBG2	2637	2321	2723
ACSBG2_2	ACSBG2	1974	1792	1715
ACSBG2_3	ACSBG2	1448	1479	1427
ACSBG2_4	ACSBG2	856	903	862
ACSF2_1	ACSF2	1450	1558	1805
ACSF2_2	ACSF2	3000	2766	2715
ACSF2_3	ACSF2	1788	1721	1987
ACSF2_4	ACSF2	1955	1600	1714
ACSF3_1	ACSF3	5259	4559	5098
ACSF3_2	ACSF3	2466	2332	2229
ACSF3_3	ACSF3	2669	2340	2384
ACSF3_4	ACSF3	2268	2404	2122
ACSL1_1	ACSL1	2297	2575	2367
ACSL1_2	ACSL1	1885	1742	1887
ACSL1_3	ACSL1	2872	2844	2674
ACSL1_4	ACSL1	897	983	979
ACSL3_1	ACSL3	1133	1168	1210
ACSL3_2	ACSL3	866	1141	1400
ACSL3_3	ACSL3	988	834	834
ACSL3_4	ACSL3	1436	1525	1629
ACSL4_1	ACSL4	1099	1060	1335
ACSL4_2	ACSL4	1244	1108	1165
ACSL4_3	ACSL4	1349	1128	1158
ACSL4_4	ACSL4	1240	931	840
ACSL5_1	ACSL5	4362	3551	4029
ACSL5_2	ACSL5	3047	2728	2721
ACSL5_3	ACSL5	2470	2096	2454
ACSL5_4	ACSL5	2193	2232	2183
ACSL6_1	ACSL6	2082	1959	2093
ACSL6_2	ACSL6	2569	1849	2112
ACSL6_3	ACSL6	724	724	768
ACSL6_4	ACSL6	1137	1009	978
ACSM1_1	ACSM1	1632	1345	1558
ACSM1_2	ACSM1	1679	1710	1956
ACSM1_3	ACSM1	3377	2781	2863
ACSM1_4	ACSM1	2210	2075	2181
ACSM2A_1	ACSM2A	2092	1902	2293
ACSM2A_2	ACSM2A	3545	3225	2922
ACSM2A_3	ACSM2A	2924	2688	3017
ACSM2A_4	ACSM2A	4322	4417	4064
ACSM2B_1	ACSM2B	2782	2701	2488
ACSM2B_2	ACSM2B	2043	1865	2045
ACSM2B_3	ACSM2B	2228	2618	2388
ACSM2B_4	ACSM2B	897	938	1053
ACSM3_1	ACSM3	2286	1881	1851
ACSM3_2	ACSM3	916	1460	1508
ACSM3_3	ACSM3	2535	2590	2518
ACSM3_4	ACSM3	3054	2261	2086
ACSM4_1	ACSM4	2025	1593	1633
ACSM4_2	ACSM4	3478	3199	3394
ACSM4_3	ACSM4	198	242	271
ACSM4_4	ACSM4	5620	4722	4583
ACSM5_1	ACSM5	3089	2805	3064
ACSM5_2	ACSM5	617	557	688
ACSM5_3	ACSM5	2957	2622	2803
ACSM5_4	ACSM5	2678	2344	2556
ACSM6_1	ACSM6	2550	2771	2581
ACSM6_2	ACSM6	2324	1904	2066
ACSM6_3	ACSM6	2611	2847	3289
ACSM6_4	ACSM6	2404	2211	2292
ACSS1_1	ACSS1	2704	2248	2620
ACSS1_2	ACSS1	2851	3296	3202
ACSS1_3	ACSS1	2476	2561	2411
ACSS1_4	ACSS1	58	66	84
ACSS2_1	ACSS2	2872	2768	2870
ACSS2_2	ACSS2	1408	1284	1385
ACSS2_3	ACSS2	3001	2493	2810
ACSS2_4	ACSS2	1019	1013	1057
ACSS3_1	ACSS3	1950	1680	1767
ACSS3_2	ACSS3	1813	1756	1956
ACSS3_3	ACSS3	1916	1664	2066
ACSS3_4	ACSS3	2355	1328	1569
ACTA1_1	ACTA1	2175	2034	2335
ACTA1_2	ACTA1	2591	2713	2612
ACTA1_3	ACTA1	728	911	1106
ACTA1_4	ACTA1	1833	1458	1453
ACTA2_1	ACTA2	3968	3086	3745
ACTA2_2	ACTA2	1475	1900	1607
ACTA2_3	ACTA2	1914	1723	1999
ACTA2_4	ACTA2	1951	1515	1793
ACTB_1	ACTB	593	823	1036
ACTB_2	ACTB	1809	1747	1700
ACTB_3	ACTB	574	510	585
ACTB_4	ACTB	1384	1427	1474
ACTBL2_1	ACTBL2	1661	1764	1610
ACTBL2_2	ACTBL2	1058	1012	1123
ACTBL2_3	ACTBL2	1451	1548	1816
ACTBL2_4	ACTBL2	2458	2308	2436
ACTC1_1	ACTC1	4563	3587	4039
ACTC1_2	ACTC1	1029	952	813
ACTC1_3	ACTC1	2029	1683	1766
ACTC1_4	ACTC1	832	930	817
ACTG1_1	ACTG1	2026	1207	1569
ACTG1_2	ACTG1	2195	2215	2293
ACTG1_3	ACTG1	3152	2950	3251
ACTG1_4	ACTG1	2215	2124	2143
ACTG2_1	ACTG2	2297	2190	2659
ACTG2_2	ACTG2	2577	2442	2448
ACTG2_3	ACTG2	2071	2220	1840
ACTG2_4	ACTG2	3948	3283	3249
ACTL10_1	ACTL10	2093	2021	2277
ACTL10_2	ACTL10	2727	2525	2478
ACTL10_3	ACTL10	4333	4181	4080
ACTL10_4	ACTL10	2904	2368	2574
ACTL6A_1	ACTL6A	1972	1846	1997
ACTL6A_2	ACTL6A	703	792	804
ACTL6A_3	ACTL6A	1484	1458	1544
ACTL6A_4	ACTL6A	1093	794	891
ACTL6B_1	ACTL6B	1197	1200	1328
ACTL6B_2	ACTL6B	1910	1898	1662
ACTL6B_3	ACTL6B	3514	2627	2689
ACTL6B_4	ACTL6B	2092	2083	2198
ACTL7A_1	ACTL7A	1841	2228	2216
ACTL7A_2	ACTL7A	1781	1465	1388
ACTL7A_3	ACTL7A	2031	1940	2014
ACTL7A_4	ACTL7A	1351	1228	1212
ACTL7B_1	ACTL7B	2888	2417	2485
ACTL7B_2	ACTL7B	3631	3175	3564
ACTL7B_3	ACTL7B	3305	3318	3302
ACTL7B_4	ACTL7B	2058	1858	1850
ACTL8_1	ACTL8	2605	2334	2464
ACTL8_2	ACTL8	2019	2265	2506
ACTL8_3	ACTL8	2829	2336	2274
ACTL8_4	ACTL8	2153	2065	2030
ACTL9_1	ACTL9	3294	2275	2283
ACTL9_2	ACTL9	2968	3149	2975
ACTL9_3	ACTL9	1923	2109	2081
ACTL9_4	ACTL9	1358	1329	1121
ACTN1_1	ACTN1	2879	2349	2596
ACTN1_2	ACTN1	1891	1777	1957
ACTN1_3	ACTN1	1135	1271	1167
ACTN1_4	ACTN1	1978	2047	2003
ACTN2_1	ACTN2	1743	1738	1812
ACTN2_2	ACTN2	3095	2782	2945
ACTN2_3	ACTN2	1890	1661	1790
ACTN2_4	ACTN2	1572	1452	1753
ACTN3_1	ACTN3	2682	2309	2610
ACTN3_2	ACTN3	846	1098	886
ACTN3_3	ACTN3	1493	1289	1658
ACTN3_4	ACTN3	515	402	456
ACTN4_1	ACTN4	2202	2068	2017
ACTN4_2	ACTN4	966	875	770
ACTN4_3	ACTN4	807	680	615
ACTN4_4	ACTN4	727	648	693
ACTR10_1	ACTR10	1121	1029	1204
ACTR10_2	ACTR10	1589	1348	1361
ACTR10_3	ACTR10	1234	1100	943
ACTR10_4	ACTR10	991	725	953
ACTR1A_1	ACTR1A	1114	919	941
ACTR1A_2	ACTR1A	1578	1690	1664
ACTR1A_3	ACTR1A	1254	1536	1692
ACTR1A_4	ACTR1A	1037	1047	949
ACTR1B_1	ACTR1B	987	1076	989
ACTR1B_2	ACTR1B	1185	1073	1327
ACTR1B_3	ACTR1B	859	804	789
ACTR1B_4	ACTR1B	26	97	70
ACTR2_1	ACTR2	495	349	211
ACTR2_2	ACTR2	1083	879	1039
ACTR2_3	ACTR2	1155	1035	1050
ACTR2_4	ACTR2	1022	746	784
ACTR3_1	ACTR3	534	526	599
ACTR3_2	ACTR3	484	540	590
ACTR3_3	ACTR3	1614	1332	1407
ACTR3_4	ACTR3	1202	964	1041
ACTR3B_1	ACTR3B	3329	2814	3252
ACTR3B_2	ACTR3B	3068	2463	2895
ACTR3B_3	ACTR3B	1354	1330	1127
ACTR3B_4	ACTR3B	2944	2154	2463
ACTR3C_1	ACTR3C	2332	1971	1884
ACTR3C_2	ACTR3C	1036	861	817
ACTR3C_3	ACTR3C	4217	3238	3252
ACTR3C_4	ACTR3C	1170	1059	1087
ACTR5_1	ACTR5	3528	3420	3212
ACTR5_2	ACTR5	750	828	676
ACTR5_3	ACTR5	1223	1190	994
ACTR5_4	ACTR5	1097	805	1060
ACTR6_1	ACTR6	2758	2465	2177
ACTR6_2	ACTR6	1508	1704	2066
ACTR6_3	ACTR6	2627	1826	2130
ACTR6_4	ACTR6	852	1365	1481
ACTR8_1	ACTR8	1937	1773	1854
ACTR8_2	ACTR8	1040	1240	1190
ACTR8_3	ACTR8	1224	991	1110
ACTR8_4	ACTR8	1326	1186	1237
ACTRT1_1	ACTRT1	3596	3279	3525
ACTRT1_2	ACTRT1	3191	3257	2840
ACTRT1_3	ACTRT1	1436	1365	1512
ACTRT1_4	ACTRT1	1748	1484	1583
ACTRT2_1	ACTRT2	4159	4094	3871
ACTRT2_2	ACTRT2	2351	2041	2058
ACTRT2_3	ACTRT2	1833	1749	2138
ACTRT2_4	ACTRT2	2160	2005	2079
ACTRT3_1	ACTRT3	2400	2106	2294
ACTRT3_2	ACTRT3	3672	3376	3703
ACTRT3_3	ACTRT3	2110	1914	1917
ACTRT3_4	ACTRT3	1572	1534	1684
ACVR1_1	ACVR1	1506	1238	1267
ACVR1_2	ACVR1	2422	2062	2018
ACVR1_3	ACVR1	542	539	561
ACVR1_4	ACVR1	2482	2100	2361
ACVR1B_1	ACVR1B	1068	1030	853
ACVR1B_2	ACVR1B	3310	2791	2855
ACVR1B_3	ACVR1B	2755	2548	3011
ACVR1B_4	ACVR1B	1561	1491	1754
ACVR1C_1	ACVR1C	511	396	342
ACVR1C_2	ACVR1C	1448	1942	1966
ACVR1C_3	ACVR1C	1444	1278	1279
ACVR1C_4	ACVR1C	2152	1849	2038
ACVR2A_1	ACVR2A	656	624	699
ACVR2A_2	ACVR2A	1894	2077	2320
ACVR2A_3	ACVR2A	3196	2786	3152
ACVR2A_4	ACVR2A	1860	1339	1466
ACVR2B_1	ACVR2B	2477	2306	2369
ACVR2B_2	ACVR2B	2815	2812	2935
ACVR2B_3	ACVR2B	644	568	795
ACVR2B_4	ACVR2B	3020	2788	2912
ACVRL1_1	ACVRL1	2384	1924	2180
ACVRL1_2	ACVRL1	2557	2314	2202
ACVRL1_3	ACVRL1	1932	1495	1488
ACVRL1_4	ACVRL1	2585	2243	2401
ACY1_1	ACY1	2749	2614	3185
ACY1_2	ACY1	3014	2471	2695
ACY1_3	ACY1	2215	1600	1807
ACY1_4	ACY1	2143	2014	1857
ACY3_1	ACY3	2152	2013	2038
ACY3_2	ACY3	1709	1602	1626
ACY3_3	ACY3	1894	1763	2079
ACY3_4	ACY3	1358	1288	1477
ACYP1_1	ACYP1	4439	3690	3897
ACYP1_2	ACYP1	1657	1827	1970
ACYP1_3	ACYP1	2653	2389	2933
ACYP1_4	ACYP1	1790	1627	1824
ACYP2_1	ACYP2	2514	2369	2376
ACYP2_2	ACYP2	4325	3558	3478
ACYP2_3	ACYP2	220	156	194
ACYP2_4	ACYP2	1399	1325	1628
ADA_1	ADA	2047	1879	1697
ADA_2	ADA	894	522	577
ADA_3	ADA	1102	1014	1132
ADA_4	ADA	4100	4054	3871
ADAD1_1	ADAD1	2888	2391	2337
ADAD1_2	ADAD1	2808	2646	2687
ADAD1_3	ADAD1	2945	2895	2959
ADAD1_4	ADAD1	3490	2385	2140
ADAD2_1	ADAD2	3306	3021	2778
ADAD2_2	ADAD2	2294	2437	2306
ADAD2_3	ADAD2	1955	1916	1986
ADAD2_4	ADAD2	972	1423	1567
ADAL_1	ADAL	1397	1458	1366
ADAL_2	ADAL	3568	3326	3102
ADAL_3	ADAL	1403	1430	1837
ADAL_4	ADAL	2750	2817	2982
ADAM10_1	ADAM10	3026	2469	2681
ADAM10_2	ADAM10	1586	1532	1561
ADAM10_3	ADAM10	778	604	549
ADAM10_4	ADAM10	688	475	578
ADAM11_1	ADAM11	1661	1720	1797
ADAM11_2	ADAM11	1057	1318	1371
ADAM11_3	ADAM11	1009	964	1162
ADAM11_4	ADAM11	2074	1962	2181
ADAM12_1	ADAM12	1994	1861	1779
ADAM12_2	ADAM12	2400	2026	2010
ADAM12_3	ADAM12	2696	2264	2489
ADAM12_4	ADAM12	3932	3500	3763
ADAM15_1	ADAM15	938	824	949
ADAM15_2	ADAM15	2906	2730	2336
ADAM15_3	ADAM15	4301	4182	4118
ADAM15_4	ADAM15	2734	2736	2927
ADAM17_1	ADAM17	3060	2883	3364
ADAM17_2	ADAM17	2990	2858	2730
ADAM17_3	ADAM17	2432	2230	2307
ADAM17_4	ADAM17	1666	1675	1702
ADAM18_1	ADAM18	1620	1658	1943
ADAM18_2	ADAM18	3493	2954	3437
ADAM18_3	ADAM18	2300	2532	2436
ADAM18_4	ADAM18	2991	2874	3130
ADAM19_1	ADAM19	1656	1524	1677
ADAM19_2	ADAM19	2739	2377	2635
ADAM19_3	ADAM19	2195	1763	1862
ADAM19_4	ADAM19	2073	1809	2043
ADAM2_1	ADAM2	2642	2574	2577
ADAM2_2	ADAM2	1518	1608	1907
ADAM2_3	ADAM2	4154	3972	4350
ADAM2_4	ADAM2	1604	1947	1903
ADAM20_1	ADAM20	1464	1512	1580
ADAM20_2	ADAM20	3427	2948	3294
ADAM20_3	ADAM20	1165	1052	993
ADAM20_4	ADAM20	1903	1957	2138
ADAM21_1	ADAM21	2874	2517	2656
ADAM21_2	ADAM21	1589	1638	1684
ADAM21_3	ADAM21	2309	1948	2369
ADAM21_4	ADAM21	2748	2774	2454
ADAM22_1	ADAM22	1766	1890	2160
ADAM22_2	ADAM22	1433	1240	1194
ADAM22_3	ADAM22	3337	2719	2805
ADAM22_4	ADAM22	1498	1230	1676
ADAM23_1	ADAM23	2039	2711	2853
ADAM23_2	ADAM23	897	1213	1278
ADAM23_3	ADAM23	2279	2021	2163
ADAM23_4	ADAM23	1766	1915	2075
ADAM28_1	ADAM28	2889	2453	2563
ADAM28_2	ADAM28	1846	2224	2320
ADAM28_3	ADAM28	2202	2447	2306
ADAM28_4	ADAM28	1674	1261	1474
ADAM29_1	ADAM29	3478	3033	3272
ADAM29_2	ADAM29	2278	2483	2708
ADAM29_3	ADAM29	2357	2412	2592
ADAM29_4	ADAM29	2021	1849	1962
ADAM30_1	ADAM30	1051	890	1150
ADAM30_2	ADAM30	2754	2859	2958
ADAM30_3	ADAM30	2265	2023	2330
ADAM30_4	ADAM30	899	666	861
ADAM32_1	ADAM32	2865	2344	2784
ADAM32_2	ADAM32	4292	4063	3937
ADAM32_3	ADAM32	2186	2366	2407
ADAM32_4	ADAM32	1201	1249	1049
ADAM33_1	ADAM33	247	301	323
ADAM33_2	ADAM33	2094	2288	2094
ADAM33_3	ADAM33	1084	961	1065
ADAM33_4	ADAM33	758	809	746
ADAM7_1	ADAM7	2453	2739	2931
ADAM7_2	ADAM7	4332	4138	4258
ADAM7_3	ADAM7	4015	4038	4061
ADAM7_4	ADAM7	3016	2830	3218
ADAM8_1	ADAM8	2677	2514	2735
ADAM8_2	ADAM8	1228	1117	1286
ADAM8_3	ADAM8	2925	2635	2723
ADAM8_4	ADAM8	1883	1902	1877
ADAM9_1	ADAM9	2061	2058	2071
ADAM9_2	ADAM9	1876	1761	1961
ADAM9_3	ADAM9	2318	2152	2408
ADAM9_4	ADAM9	1203	1201	1406
ADAMDEC1_1	ADAMDEC1	464	480	450
ADAMDEC1_2	ADAMDEC1	2441	2344	2431
ADAMDEC1_3	ADAMDEC1	3332	2983	2844
ADAMDEC1_4	ADAMDEC1	3376	3003	2934
ADAMTS1_1	ADAMTS1	2588	2692	2675
ADAMTS1_2	ADAMTS1	1584	2004	2356
ADAMTS1_3	ADAMTS1	1670	1991	2206
ADAMTS1_4	ADAMTS1	5259	4915	4946
ADAMTS10_1	ADAMTS10	1738	1565	1729
ADAMTS10_2	ADAMTS10	2096	1509	1578
ADAMTS10_3	ADAMTS10	1677	1773	1580
ADAMTS10_4	ADAMTS10	494	291	346
ADAMTS12_1	ADAMTS12	4143	3437	3469
ADAMTS12_2	ADAMTS12	2847	2551	2836
ADAMTS12_3	ADAMTS12	3656	3755	3680
ADAMTS12_4	ADAMTS12	1364	1022	1251
ADAMTS13_1	ADAMTS13	1513	1486	1395
ADAMTS13_2	ADAMTS13	1238	979	843
ADAMTS13_3	ADAMTS13	2614	2244	2172
ADAMTS13_4	ADAMTS13	1898	1953	1958
ADAMTS14_1	ADAMTS14	3085	2294	2617
ADAMTS14_2	ADAMTS14	2168	1864	1968
ADAMTS14_3	ADAMTS14	1808	1673	1416
ADAMTS14_4	ADAMTS14	2759	2827	2577
ADAMTS15_1	ADAMTS15	211	152	153
ADAMTS15_2	ADAMTS15	5175	4210	4631
ADAMTS15_3	ADAMTS15	4190	3536	3842
ADAMTS15_4	ADAMTS15	5153	3901	4120
ADAMTS16_1	ADAMTS16	2717	3176	3511
ADAMTS16_2	ADAMTS16	1454	1250	1184
ADAMTS16_3	ADAMTS16	1337	1183	1135
ADAMTS16_4	ADAMTS16	2057	1680	1588
ADAMTS17_1	ADAMTS17	116	381	573
ADAMTS17_2	ADAMTS17	1426	1181	1065
ADAMTS17_3	ADAMTS17	2661	2537	2474
ADAMTS17_4	ADAMTS17	2037	1565	1408
ADAMTS18_1	ADAMTS18	3220	3197	3211
ADAMTS18_2	ADAMTS18	4521	3948	4279
ADAMTS18_3	ADAMTS18	1975	2108	2104
ADAMTS18_4	ADAMTS18	1958	1852	2096
ADAMTS19_1	ADAMTS19	2149	2134	2150
ADAMTS19_2	ADAMTS19	2780	2877	3303
ADAMTS19_3	ADAMTS19	3787	3014	3157
ADAMTS19_4	ADAMTS19	1640	1576	1588
ADAMTS2_1	ADAMTS2	2117	2416	2559
ADAMTS2_2	ADAMTS2	2320	2228	2250
ADAMTS2_3	ADAMTS2	3129	2457	2295
ADAMTS2_4	ADAMTS2	1218	1093	1338
ADAMTS20_1	ADAMTS20	2258	1505	1988
ADAMTS20_2	ADAMTS20	1219	1387	1092
ADAMTS20_3	ADAMTS20	4447	3048	3387
ADAMTS20_4	ADAMTS20	2699	2085	2354
ADAMTS3_1	ADAMTS3	4648	3492	4221
ADAMTS3_2	ADAMTS3	2896	2481	2782
ADAMTS3_3	ADAMTS3	2106	1889	1722
ADAMTS3_4	ADAMTS3	779	683	672
ADAMTS4_1	ADAMTS4	1170	1120	1249
ADAMTS4_2	ADAMTS4	1113	1275	1143
ADAMTS4_3	ADAMTS4	1886	1587	1679
ADAMTS4_4	ADAMTS4	3395	2874	2941
ADAMTS5_1	ADAMTS5	3350	2994	3272
ADAMTS5_2	ADAMTS5	3381	3447	3398
ADAMTS5_3	ADAMTS5	3184	2940	2976
ADAMTS5_4	ADAMTS5	1596	1546	1384
ADAMTS6_1	ADAMTS6	4521	3960	4515
ADAMTS6_2	ADAMTS6	1436	1353	1544
ADAMTS6_3	ADAMTS6	2737	2501	2559
ADAMTS6_4	ADAMTS6	1213	1233	1212
ADAMTS7_1	ADAMTS7	1940	1760	1832
ADAMTS7_2	ADAMTS7	1838	1383	1469
ADAMTS7_3	ADAMTS7	1687	1843	1588
ADAMTS7_4	ADAMTS7	2407	1798	2152
ADAMTS8_1	ADAMTS8	1868	1966	2007
ADAMTS8_2	ADAMTS8	1876	2187	2539
ADAMTS8_3	ADAMTS8	3240	2907	3112
ADAMTS8_4	ADAMTS8	2091	2098	2167
ADAMTS9_1	ADAMTS9	2787	2412	2266
ADAMTS9_2	ADAMTS9	1871	2023	2099
ADAMTS9_3	ADAMTS9	3103	3591	3061
ADAMTS9_4	ADAMTS9	1697	1592	1427
ADAMTSL1_1	ADAMTSL1	1918	2032	2050
ADAMTSL1_2	ADAMTSL1	4297	3647	3323
ADAMTSL1_3	ADAMTSL1	3172	2692	3027
ADAMTSL1_4	ADAMTSL1	2662	2609	2734
ADAMTSL2_1	ADAMTSL2	1783	1881	2071
ADAMTSL2_2	ADAMTSL2	774	699	798
ADAMTSL2_3	ADAMTSL2	3931	3605	3718
ADAMTSL2_4	ADAMTSL2	1785	2005	1643
ADAMTSL3_1	ADAMTSL3	2191	2079	2039
ADAMTSL3_2	ADAMTSL3	1804	1804	2046
ADAMTSL3_3	ADAMTSL3	1441	1231	1242
ADAMTSL3_4	ADAMTSL3	3640	3250	3505
ADAMTSL4_1	ADAMTSL4	1263	1743	1863
ADAMTSL4_2	ADAMTSL4	435	252	332
ADAMTSL4_3	ADAMTSL4	2032	1548	1384
ADAMTSL4_4	ADAMTSL4	406	310	388
ADAMTSL5_1	ADAMTSL5	3111	3158	3468
ADAMTSL5_2	ADAMTSL5	2285	2124	2217
ADAMTSL5_3	ADAMTSL5	1899	1545	1628
ADAMTSL5_4	ADAMTSL5	1732	1530	1859
ADAP1_1	ADAP1	996	958	862
ADAP1_2	ADAP1	1490	1664	1910
ADAP1_3	ADAP1	834	820	907
ADAP1_4	ADAP1	2207	2141	2236
ADAP2_1	ADAP2	2327	2483	2267
ADAP2_2	ADAP2	2106	1611	2170
ADAP2_3	ADAP2	2054	1815	1741
ADAP2_4	ADAP2	680	736	738
ADAR_1	ADAR	2014	2038	2169
ADAR_2	ADAR	1134	968	962
ADAR_3	ADAR	1689	1172	1367
ADAR_4	ADAR	1168	1042	848
ADARB1_1	ADARB1	3513	2761	2882
ADARB1_2	ADARB1	2840	2088	2708
ADARB1_3	ADARB1	2652	2742	2915
ADARB1_4	ADARB1	1637	1618	1573
ADARB2_1	ADARB2	2154	2228	2048
ADARB2_2	ADARB2	2055	1939	2161
ADARB2_3	ADARB2	2294	2071	1861
ADARB2_4	ADARB2	588	559	568
ADAT1_1	ADAT1	3553	3341	3157
ADAT1_2	ADAT1	2933	2521	2585
ADAT1_3	ADAT1	3587	3387	3216
ADAT1_4	ADAT1	3896	2655	3095
ADAT2_1	ADAT2	3159	3190	3155
ADAT2_2	ADAT2	3159	3425	3551
ADAT2_3	ADAT2	962	1075	1182
ADAT2_4	ADAT2	1984	2273	2193
ADAT3_1	ADAT3	2733	2233	2621
ADAT3_2	ADAT3	1008	1008	1327
ADAT3_3	ADAT3	2926	2329	2275
ADAT3_4	ADAT3	703	786	929
ADCK1_1	ADCK1	2602	2447	2209
ADCK1_2	ADCK1	4586	3910	4262
ADCK1_3	ADCK1	37	35	33
ADCK1_4	ADCK1	2509	1903	2138
ADCK2_1	ADCK2	1718	2056	1837
ADCK2_2	ADCK2	2251	2332	2295
ADCK2_3	ADCK2	2269	2073	1998
ADCK2_4	ADCK2	1233	1310	1362
ADCK3_1	ADCK3	1683	1677	1838
ADCK3_2	ADCK3	1451	1489	1713
ADCK3_3	ADCK3	783	698	807
ADCK3_4	ADCK3	1524	1690	1783
ADCK4_1	ADCK4	4211	4458	4428
ADCK4_2	ADCK4	3247	2794	3090
ADCK4_3	ADCK4	1862	1501	1556
ADCK4_4	ADCK4	1417	1320	1609
ADCK5_1	ADCK5	1947	2018	1951
ADCK5_2	ADCK5	3267	2654	2891
ADCK5_3	ADCK5	3921	2975	3453
ADCK5_4	ADCK5	3052	2909	2671
ADCY1_1	ADCY1	1610	1736	1711
ADCY1_2	ADCY1	2557	2214	2049
ADCY1_3	ADCY1	2136	2384	2284
ADCY1_4	ADCY1	1851	1535	1258
ADCY10_1	ADCY10	4425	3717	3809
ADCY10_2	ADCY10	2080	2183	2336
ADCY10_3	ADCY10	1951	2334	2271
ADCY10_4	ADCY10	2596	2476	2277
ADCY2_1	ADCY2	3093	2538	2648
ADCY2_2	ADCY2	4166	3107	3555
ADCY2_3	ADCY2	4404	4183	4484
ADCY2_4	ADCY2	2708	2579	2357
ADCY3_1	ADCY3	2759	2812	2890
ADCY3_2	ADCY3	1381	1290	1155
ADCY3_3	ADCY3	793	563	703
ADCY3_4	ADCY3	727	740	772
ADCY4_1	ADCY4	1163	1284	1385
ADCY4_2	ADCY4	1603	1483	1558
ADCY4_3	ADCY4	1770	1517	1436
ADCY4_4	ADCY4	1464	1397	1301
ADCY5_1	ADCY5	3422	3349	3610
ADCY5_2	ADCY5	1763	1540	1392
ADCY5_3	ADCY5	810	903	880
ADCY5_4	ADCY5	3840	3557	3520
ADCY6_1	ADCY6	1989	1882	1574
ADCY6_2	ADCY6	1764	1681	1622
ADCY6_3	ADCY6	335	221	368
ADCY6_4	ADCY6	1708	1415	1613
ADCY7_1	ADCY7	1777	1645	1811
ADCY7_2	ADCY7	2107	1696	1844
ADCY7_3	ADCY7	2008	1957	1660
ADCY7_4	ADCY7	1248	1196	1023
ADCY8_1	ADCY8	46	57	72
ADCY8_2	ADCY8	3480	2885	2751
ADCY8_3	ADCY8	1766	1792	1814
ADCY8_4	ADCY8	3078	2746	2863
ADCY9_1	ADCY9	1371	1226	1225
ADCY9_2	ADCY9	3664	3511	3571
ADCY9_3	ADCY9	3087	2878	2969
ADCY9_4	ADCY9	1412	1198	1455
ADCYAP1_1	ADCYAP1	3389	2941	3257
ADCYAP1_2	ADCYAP1	2838	2983	3123
ADCYAP1_3	ADCYAP1	6332	5165	5414
ADCYAP1_4	ADCYAP1	733	620	674
ADCYAP1R1_1	ADCYAP1R1	2988	3264	3170
ADCYAP1R1_2	ADCYAP1R1	3179	2530	2775
ADCYAP1R1_3	ADCYAP1R1	1648	1905	1765
ADCYAP1R1_4	ADCYAP1R1	1955	1717	1723
ADD1_1	ADD1	1490	1383	1426
ADD1_2	ADD1	2578	1902	2310
ADD1_3	ADD1	1871	1747	1901
ADD1_4	ADD1	2697	2320	2954
ADD2_1	ADD2	2046	1659	1585
ADD2_2	ADD2	2510	2469	2402
ADD2_3	ADD2	2041	2068	2060
ADD2_4	ADD2	864	1211	1104
ADD3_1	ADD3	2090	2095	2294
ADD3_2	ADD3	2153	2527	2439
ADD3_3	ADD3	4179	3722	4072
ADD3_4	ADD3	1748	2137	2191
ADGB_1	ADGB	1840	2124	2353
ADGB_2	ADGB	4151	3306	3756
ADGB_3	ADGB	1787	1509	2101
ADGB_4	ADGB	3583	3092	3107
ADGRA1_1	ADGRA1	2881	2854	2778
ADGRA1_2	ADGRA1	4354	3694	3609
ADGRA1_3	ADGRA1	2602	2759	2736
ADGRA1_4	ADGRA1	2518	2272	2389
ADGRA2_1	ADGRA2	1733	1354	1560
ADGRA2_2	ADGRA2	751	1169	1163
ADGRA2_3	ADGRA2	3328	3314	3405
ADGRA2_4	ADGRA2	1675	1495	1469
ADGRA3_1	ADGRA3	2481	2147	2169
ADGRA3_2	ADGRA3	4127	3745	4189
ADGRA3_3	ADGRA3	2880	3114	3339
ADGRA3_4	ADGRA3	1691	1637	1479
ADGRB1_1	ADGRB1	2697	2219	2377
ADGRB1_2	ADGRB1	1504	1642	2004
ADGRB1_3	ADGRB1	999	902	906
ADGRB1_4	ADGRB1	1691	1753	1609
ADGRB2_1	ADGRB2	3128	2627	2385
ADGRB2_2	ADGRB2	3116	3039	2617
ADGRB2_3	ADGRB2	1551	1421	1371
ADGRB2_4	ADGRB2	2948	2840	2775
ADGRB3_1	ADGRB3	1824	1925	2036
ADGRB3_2	ADGRB3	1489	1530	1607
ADGRB3_3	ADGRB3	2755	2090	2205
ADGRB3_4	ADGRB3	2478	1743	1813
ADGRD1_1	ADGRD1	1170	1767	1909
ADGRD1_2	ADGRD1	2785	2373	2522
ADGRD1_3	ADGRD1	3570	3456	3472
ADGRD1_4	ADGRD1	150	103	178
ADGRE1_1	ADGRE1	1810	1962	1867
ADGRE1_2	ADGRE1	1501	1569	1606
ADGRE1_3	ADGRE1	2171	2001	1859
ADGRE1_4	ADGRE1	2138	1577	1848
ADGRE2_1	ADGRE2	1313	1395	1574
ADGRE2_2	ADGRE2	1775	1926	2138
ADGRE2_3	ADGRE2	1732	1548	1499
ADGRE2_4	ADGRE2	191	186	181
ADGRE3_1	ADGRE3	1714	1631	1561
ADGRE3_2	ADGRE3	1259	1282	1478
ADGRE3_3	ADGRE3	1370	1319	1626
ADGRE3_4	ADGRE3	1839	1789	1630
ADGRE5_1	ADGRE5	1592	1376	1401
ADGRE5_2	ADGRE5	582	447	480
ADGRE5_3	ADGRE5	1514	1308	1274
ADGRE5_4	ADGRE5	1065	977	1107
ADGRF1_1	ADGRF1	2598	2567	2559
ADGRF1_2	ADGRF1	2999	2684	2727
ADGRF1_3	ADGRF1	2417	2491	2503
ADGRF1_4	ADGRF1	768	711	769
ADGRF2_1	ADGRF2	732	910	835
ADGRF2_2	ADGRF2	1947	1695	2001
ADGRF2_3	ADGRF2	2082	1726	1743
ADGRF2_4	ADGRF2	3820	3689	3748
ADGRF3_1	ADGRF3	3361	2729	2872
ADGRF3_2	ADGRF3	1736	2149	1887
ADGRF3_3	ADGRF3	3338	2880	2814
ADGRF3_4	ADGRF3	2996	2747	3026
ADGRF4_1	ADGRF4	1452	1317	1452
ADGRF4_2	ADGRF4	1673	2240	2133
ADGRF4_3	ADGRF4	2490	2362	2346
ADGRF4_4	ADGRF4	1985	1992	2033
ADGRF5_1	ADGRF5	2005	1865	2276
ADGRF5_2	ADGRF5	1956	1529	1803
ADGRF5_3	ADGRF5	1390	1421	1570
ADGRF5_4	ADGRF5	1095	1041	1228
ADGRG1_1	ADGRG1	2012	2245	2507
ADGRG1_2	ADGRG1	5091	3843	4609
ADGRG1_3	ADGRG1	1908	1664	1743
ADGRG1_4	ADGRG1	1485	1287	1408
ADGRG2_1	ADGRG2	3733	3621	3482
ADGRG2_2	ADGRG2	1607	1860	1672
ADGRG2_3	ADGRG2	2037	1984	1881
ADGRG2_4	ADGRG2	1942	1701	1719
ADGRG3_1	ADGRG3	2088	1807	1964
ADGRG3_2	ADGRG3	2824	2383	2426
ADGRG3_3	ADGRG3	2036	1496	1571
ADGRG3_4	ADGRG3	1618	1818	2340
ADGRG4_1	ADGRG4	2154	1477	1717
ADGRG4_2	ADGRG4	4854	3610	3703
ADGRG4_3	ADGRG4	2172	1964	2057
ADGRG4_4	ADGRG4	1331	1034	1168
ADGRG5_1	ADGRG5	2164	1891	2195
ADGRG5_2	ADGRG5	1593	1354	1425
ADGRG5_3	ADGRG5	2322	1962	1897
ADGRG5_4	ADGRG5	1541	1375	1392
ADGRG6_1	ADGRG6	3491	3319	3220
ADGRG6_2	ADGRG6	3275	3184	3410
ADGRG6_3	ADGRG6	2090	1404	1533
ADGRG6_4	ADGRG6	27	38	41
ADGRG7_1	ADGRG7	1411	1197	1236
ADGRG7_2	ADGRG7	2108	1846	1767
ADGRG7_3	ADGRG7	2101	1928	2064
ADGRG7_4	ADGRG7	1426	1131	1167
ADGRL1_1	ADGRL1	3371	2669	3120
ADGRL1_2	ADGRL1	2394	2642	2597
ADGRL1_3	ADGRL1	3153	3004	3092
ADGRL1_4	ADGRL1	2747	2208	2141
ADGRL2_1	ADGRL2	2799	2252	2548
ADGRL2_2	ADGRL2	2594	2473	2920
ADGRL2_3	ADGRL2	2884	2349	2594
ADGRL2_4	ADGRL2	768	706	854
ADGRL3_1	ADGRL3	3318	2818	3296
ADGRL3_2	ADGRL3	1754	1594	1531
ADGRL3_3	ADGRL3	2384	2496	2218
ADGRL3_4	ADGRL3	2007	1895	1829
ADGRL4_1	ADGRL4	1890	1814	1658
ADGRL4_2	ADGRL4	1815	1488	1585
ADGRL4_3	ADGRL4	2911	3128	3236
ADGRL4_4	ADGRL4	3577	3027	3391
ADGRV1_1	ADGRV1	1954	1575	2082
ADGRV1_2	ADGRV1	3139	2936	3282
ADGRV1_3	ADGRV1	1100	1003	1209
ADGRV1_4	ADGRV1	428	608	670
ADH1A_1	ADH1A	1617	1501	1686
ADH1A_2	ADH1A	1660	1393	1404
ADH1A_3	ADH1A	4343	4082	4206
ADH1A_4	ADH1A	3303	2594	2348
ADH1B_1	ADH1B	3428	2781	2903
ADH1B_2	ADH1B	2169	1901	1903
ADH1B_3	ADH1B	4215	3229	3210
ADH1B_4	ADH1B	5658	5151	5014
ADH1C_1	ADH1C	2622	2505	2376
ADH1C_2	ADH1C	5187	4335	4281
ADH1C_3	ADH1C	945	1152	940
ADH1C_4	ADH1C	3292	3480	3662
ADH4_1	ADH4	1010	914	1081
ADH4_2	ADH4	2528	2278	2280
ADH4_3	ADH4	2442	2852	3032
ADH4_4	ADH4	438	459	498
ADH5_1	ADH5	1871	1900	2049
ADH5_2	ADH5	926	979	1203
ADH5_3	ADH5	1818	1267	1566
ADH5_4	ADH5	1120	1196	1424
ADH6_1	ADH6	5812	4726	5388
ADH6_2	ADH6	699	470	476
ADH6_3	ADH6	1007	1118	1114
ADH6_4	ADH6	4132	3557	3482
ADH7_1	ADH7	2224	3059	3594
ADH7_2	ADH7	1532	1123	1224
ADH7_3	ADH7	2463	1934	1991
ADH7_4	ADH7	1341	1274	1306
ADHFE1_1	ADHFE1	2554	2562	2204
ADHFE1_2	ADHFE1	3568	3363	3145
ADHFE1_3	ADHFE1	1768	1475	1558
ADHFE1_4	ADHFE1	1350	1126	990
ADI1_1	ADI1	5946	4619	4925
ADI1_2	ADI1	2460	2733	2619
ADI1_3	ADI1	2702	2449	2586
ADI1_4	ADI1	1968	1581	1856
ADIG_1	ADIG	962	828	923
ADIG_2	ADIG	3060	2895	3167
ADIG_3	ADIG	1975	2557	2777
ADIG_4	ADIG	362	266	359
ADIPOQ_1	ADIPOQ	2639	3643	3701
ADIPOQ_2	ADIPOQ	1941	1904	2214
ADIPOQ_3	ADIPOQ	2571	2301	2078
ADIPOQ_4	ADIPOQ	3417	3561	3811
ADIPOR1_1	ADIPOR1	2210	2173	2393
ADIPOR1_2	ADIPOR1	5090	4217	4411
ADIPOR1_3	ADIPOR1	2073	1888	2134
ADIPOR1_4	ADIPOR1	879	927	913
ADIPOR2_1	ADIPOR2	3452	3551	3632
ADIPOR2_2	ADIPOR2	2388	2567	2682
ADIPOR2_3	ADIPOR2	1836	2018	2235
ADIPOR2_4	ADIPOR2	3043	2869	3165
ADIRF_1	ADIRF	1058	1166	943
ADIRF_2	ADIRF	1145	750	809
ADIRF_3	ADIRF	3779	3423	3700
ADIRF_4	ADIRF	1537	1647	1724
ADK_1	ADK	3195	2589	2553
ADK_2	ADK	2862	2445	2899
ADK_3	ADK	2498	2543	2428
ADK_4	ADK	1707	1577	1959
ADM_1	ADM	3235	2966	2997
ADM_2	ADM	2280	1785	2134
ADM_3	ADM	1210	992	1079
ADM_4	ADM	1436	1250	1356
ADM2_1	ADM2	4345	4431	4616
ADM2_2	ADM2	2399	2508	2756
ADM2_3	ADM2	2897	3178	3379
ADM2_4	ADM2	2168	2069	2202
ADM5_1	ADM5	574	517	546
ADM5_2	ADM5	1535	1183	1445
ADM5_3	ADM5	1501	1234	1486
ADM5_4	ADM5	346	329	346
ADNP_1	ADNP	1999	1647	1781
ADNP_2	ADNP	1691	1542	1412
ADNP_3	ADNP	2824	3072	3104
ADNP_4	ADNP	2258	1837	2081
ADNP2_1	ADNP2	3082	2523	3002
ADNP2_2	ADNP2	4537	3828	4044
ADNP2_3	ADNP2	3477	3114	3414
ADNP2_4	ADNP2	1357	1267	1322
ADO_1	ADO	3045	2112	2458
ADO_2	ADO	1638	1595	1679
ADO_3	ADO	1433	1258	1442
ADO_4	ADO	2272	1906	2270
ADORA1_1	ADORA1	855	881	1013
ADORA1_2	ADORA1	2093	2214	2153
ADORA1_3	ADORA1	1101	1066	913
ADORA1_4	ADORA1	1235	1333	1069
ADORA2A_1	ADORA2A	2677	1754	1956
ADORA2A_2	ADORA2A	3044	2565	2620
ADORA2A_3	ADORA2A	1147	1282	1164
ADORA2A_4	ADORA2A	1467	1308	1094
ADORA2B_1	ADORA2B	3468	3034	2948
ADORA2B_2	ADORA2B	2279	2590	2533
ADORA2B_3	ADORA2B	1824	1718	1574
ADORA2B_4	ADORA2B	4342	3763	4090
ADORA3_1	ADORA3	2057	2071	2411
ADORA3_2	ADORA3	1512	1187	1479
ADORA3_3	ADORA3	3371	3151	3015
ADORA3_4	ADORA3	2076	2130	2357
ADPGK_1	ADPGK	2302	1986	1977
ADPGK_2	ADPGK	2495	2245	2205
ADPGK_3	ADPGK	6002	6102	5372
ADPGK_4	ADPGK	3007	2937	2704
ADPRH_1	ADPRH	1643	1499	1331
ADPRH_2	ADPRH	1443	1462	1539
ADPRH_3	ADPRH	2498	2412	2706
ADPRH_4	ADPRH	2219	1959	1974
ADPRHL1_1	ADPRHL1	4204	3609	3774
ADPRHL1_2	ADPRHL1	1633	1450	1721
ADPRHL1_3	ADPRHL1	3008	2516	2734
ADPRHL1_4	ADPRHL1	1642	1615	1616
ADPRHL2_1	ADPRHL2	1394	1300	1440
ADPRHL2_2	ADPRHL2	2120	2114	2004
ADPRHL2_3	ADPRHL2	4218	2492	2783
ADPRHL2_4	ADPRHL2	1655	2308	2144
ADPRM_1	ADPRM	2330	2045	2330
ADPRM_2	ADPRM	3293	3055	2998
ADPRM_3	ADPRM	1891	2164	2545
ADPRM_4	ADPRM	2247	1716	1925
ADRA1A_1	ADRA1A	2813	2539	2687
ADRA1A_2	ADRA1A	2946	2938	3018
ADRA1A_3	ADRA1A	1499	1507	1714
ADRA1A_4	ADRA1A	2271	2161	2375
ADRA1B_1	ADRA1B	5151	4638	5179
ADRA1B_2	ADRA1B	358	311	483
ADRA1B_3	ADRA1B	4384	3838	4139
ADRA1B_4	ADRA1B	1825	1659	1812
ADRA1D_1	ADRA1D	1174	855	1048
ADRA1D_2	ADRA1D	2450	2493	2127
ADRA1D_3	ADRA1D	1794	1202	1398
ADRA1D_4	ADRA1D	2397	1711	2005
ADRA2A_1	ADRA2A	2587	2239	2223
ADRA2A_2	ADRA2A	4192	3761	4174
ADRA2A_3	ADRA2A	939	726	876
ADRA2A_4	ADRA2A	3328	2458	2575
ADRA2B_1	ADRA2B	2483	1598	1690
ADRA2B_2	ADRA2B	1432	1612	1720
ADRA2B_3	ADRA2B	1029	897	910
ADRA2B_4	ADRA2B	388	307	381
ADRA2C_1	ADRA2C	4273	3519	3501
ADRA2C_2	ADRA2C	2906	2448	2614
ADRA2C_3	ADRA2C	638	640	658
ADRA2C_4	ADRA2C	1441	1576	1478
ADRB1_1	ADRB1	985	904	858
ADRB1_2	ADRB1	2977	3254	3451
ADRB1_3	ADRB1	2936	2459	3022
ADRB1_4	ADRB1	643	464	547
ADRB2_1	ADRB2	2182	2065	2192
ADRB2_2	ADRB2	2065	2683	2924
ADRB2_3	ADRB2	64	36	67
ADRB2_4	ADRB2	1939	1561	1708
ADRB3_1	ADRB3	2704	2602	2420
ADRB3_2	ADRB3	2122	1958	2025
ADRB3_3	ADRB3	3110	2888	2842
ADRB3_4	ADRB3	2167	1968	1919
ADRBK1_1	ADRBK1	2357	2019	2237
ADRBK1_2	ADRBK1	2153	1834	2005
ADRBK1_3	ADRBK1	2854	2824	2874
ADRBK1_4	ADRBK1	1092	1152	1150
ADRBK2_1	ADRBK2	2041	1739	1654
ADRBK2_2	ADRBK2	3156	2746	2563
ADRBK2_3	ADRBK2	2503	1930	1941
ADRBK2_4	ADRBK2	2334	2225	2261
ADRM1_1	ADRM1	1455	1346	1587
ADRM1_2	ADRM1	2475	2367	2433
ADRM1_3	ADRM1	1012	1049	1297
ADRM1_4	ADRM1	568	574	729
ADSL_1	ADSL	961	749	974
ADSL_2	ADSL	1893	1494	1943
ADSL_3	ADSL	498	555	568
ADSL_4	ADSL	1170	1214	1343
ADSS_1	ADSS	348	392	529
ADSS_2	ADSS	1994	1451	1474
ADSS_3	ADSS	611	980	854
ADSS_4	ADSS	851	860	804
ADSSL1_1	ADSSL1	2332	2314	2631
ADSSL1_2	ADSSL1	3029	3093	3175
ADSSL1_3	ADSSL1	2044	2072	2189
ADSSL1_4	ADSSL1	1379	1417	1471
ADTRP_1	ADTRP	2161	1937	2374
ADTRP_2	ADTRP	1934	2242	2092
ADTRP_3	ADTRP	1940	1692	1969
ADTRP_4	ADTRP	2696	2239	2366
AEBP1_1	AEBP1	2266	2361	2299
AEBP1_2	AEBP1	1917	1834	1691
AEBP1_3	AEBP1	2503	2516	2780
AEBP1_4	AEBP1	1719	1551	1464
AEBP2_1	AEBP2	3558	3046	3101
AEBP2_2	AEBP2	2458	2961	2893
AEBP2_3	AEBP2	1018	911	1080
AEBP2_4	AEBP2	2850	2449	2500
AEN_1	AEN	3477	3518	3610
AEN_2	AEN	1351	1436	1500
AEN_3	AEN	5976	4729	4895
AEN_4	AEN	1239	1171	1377
AES_1	AES	1788	1850	1818
AES_2	AES	1940	2054	2042
AES_3	AES	1750	1721	1754
AES_4	AES	1453	1629	1341
AFAP1_1	AFAP1	1356	877	1144
AFAP1_2	AFAP1	3076	2673	2803
AFAP1_3	AFAP1	782	744	878
AFAP1_4	AFAP1	1683	1735	1782
AFAP1L1_1	AFAP1L1	789	856	810
AFAP1L1_2	AFAP1L1	875	810	794
AFAP1L1_3	AFAP1L1	1412	1333	1305
AFAP1L1_4	AFAP1L1	191	162	251
AFAP1L2_1	AFAP1L2	3057	2579	2517
AFAP1L2_2	AFAP1L2	1843	1914	2238
AFAP1L2_3	AFAP1L2	2635	2685	2759
AFAP1L2_4	AFAP1L2	2737	2790	2684
AFF1_1	AFF1	2876	2515	2697
AFF1_2	AFF1	2678	2312	2431
AFF1_3	AFF1	1488	1702	1736
AFF1_4	AFF1	115	146	231
AFF2_1	AFF2	1701	1736	1826
AFF2_2	AFF2	3804	3975	4226
AFF2_3	AFF2	1615	1409	1760
AFF2_4	AFF2	2039	1728	1866
AFF3_1	AFF3	2253	2205	1945
AFF3_2	AFF3	966	1292	1474
AFF3_3	AFF3	2736	2513	2365
AFF3_4	AFF3	581	457	532
AFF4_1	AFF4	3859	3228	3037
AFF4_2	AFF4	988	1288	963
AFF4_3	AFF4	2445	2304	2604
AFF4_4	AFF4	1876	1611	1834
AFG3L2_1	AFG3L2	2700	2385	2445
AFG3L2_2	AFG3L2	2130	1946	2067
AFG3L2_3	AFG3L2	1919	2060	1826
AFG3L2_4	AFG3L2	74	73	85
AFM_1	AFM	1262	1503	1553
AFM_2	AFM	2170	1630	1921
AFM_3	AFM	3891	3848	3757
AFM_4	AFM	1550	1951	1891
AFMID_1	AFMID	2867	3138	3651
AFMID_2	AFMID	3381	2490	2691
AFMID_3	AFMID	2405	2044	2199
AFMID_4	AFMID	3086	2648	2798
AFP_1	AFP	7112	5346	5409
AFP_2	AFP	2199	1904	1964
AFP_3	AFP	2109	2360	2396
AFP_4	AFP	1504	1353	1454
AFTPH_1	AFTPH	3320	2324	2565
AFTPH_2	AFTPH	2356	2224	2318
AFTPH_3	AFTPH	1549	1650	1648
AFTPH_4	AFTPH	1797	1773	1950
AGA_1	AGA	1150	1169	1309
AGA_2	AGA	2482	2559	2869
AGA_3	AGA	1596	1396	1377
AGA_4	AGA	2997	2940	2794
AGAP1_1	AGAP1	2469	2177	2526
AGAP1_2	AGAP1	3067	2518	2753
AGAP1_3	AGAP1	1617	1720	1749
AGAP1_4	AGAP1	1963	1609	1533
AGAP11_1	AGAP11	1784	1390	1556
AGAP11_2	AGAP11	2461	1811	2091
AGAP11_3	AGAP11	1142	1022	1093
AGAP11_4	AGAP11	1410	823	1094
AGAP2_1	AGAP2	1479	1206	1301
AGAP2_2	AGAP2	1373	1303	1278
AGAP2_3	AGAP2	1759	2100	2092
AGAP2_4	AGAP2	2366	1898	1751
AGAP3_1	AGAP3	3548	3417	3369
AGAP3_2	AGAP3	1148	950	983
AGAP3_3	AGAP3	3262	2833	2845
AGAP3_4	AGAP3	2979	2626	3164
AGAP4_1	AGAP4	597	400	383
AGAP4_2	AGAP4	1179	1046	1205
AGAP4_3	AGAP4	829	567	484
AGAP4_4	AGAP4	1464	936	1258
AGAP5_1	AGAP5	1319	1214	1224
AGAP5_2	AGAP5	675	645	787
AGAP5_3	AGAP5	1607	1521	1411
AGAP5_4	AGAP5	1978	1454	1507
AGAP6_1	AGAP6	3679	3281	3861
AGAP6_2	AGAP6	1347	872	808
AGAP6_3	AGAP6	985	905	963
AGAP6_4	AGAP6	1156	1048	1046
AGAP9_1	AGAP9	1517	1379	1536
AGAP9_2	AGAP9	644	496	526
AGAP9_3	AGAP9	809	724	746
AGAP9_4	AGAP9	451	337	425
AGBL1_1	AGBL1	3161	2931	3111
AGBL1_2	AGBL1	3436	3010	2987
AGBL1_3	AGBL1	1787	1710	1912
AGBL1_4	AGBL1	1296	1052	1041
AGBL2_1	AGBL2	1538	1270	1409
AGBL2_2	AGBL2	1885	1725	1919
AGBL2_3	AGBL2	2099	2249	2113
AGBL2_4	AGBL2	2519	2445	2935
AGBL3_1	AGBL3	2780	2615	2614
AGBL3_2	AGBL3	1761	1651	1779
AGBL3_3	AGBL3	2632	2609	2663
AGBL3_4	AGBL3	775	522	833
AGBL4_1	AGBL4	2150	2305	2402
AGBL4_2	AGBL4	506	535	407
AGBL4_3	AGBL4	869	698	658
AGBL4_4	AGBL4	3399	3099	3304
AGBL5_1	AGBL5	1030	889	1105
AGBL5_2	AGBL5	2932	2111	2419
AGBL5_3	AGBL5	2049	1889	2047
AGBL5_4	AGBL5	1573	1198	1508
AGER_1	AGER	2641	2241	2474
AGER_2	AGER	2390	1983	2089
AGER_3	AGER	3702	3289	3242
AGER_4	AGER	2553	2296	2407
AGFG1_1	AGFG1	1507	1755	1888
AGFG1_2	AGFG1	1266	1619	1688
AGFG1_3	AGFG1	2563	2156	2567
AGFG1_4	AGFG1	3143	3007	3378
AGFG2_1	AGFG2	4748	4536	4386
AGFG2_2	AGFG2	3956	3411	3739
AGFG2_3	AGFG2	1525	1596	1557
AGFG2_4	AGFG2	3446	3489	3088
AGGF1_1	AGGF1	1786	1789	2110
AGGF1_2	AGGF1	1663	1861	1835
AGGF1_3	AGGF1	3348	2847	3168
AGGF1_4	AGGF1	788	567	773
AGK_1	AGK	1988	1851	1824
AGK_2	AGK	926	1107	960
AGK_3	AGK	3193	3088	3009
AGK_4	AGK	2320	2207	2088
AGL_1	AGL	1794	2007	2316
AGL_2	AGL	1220	936	1094
AGL_3	AGL	2342	2369	2389
AGL_4	AGL	2081	2136	2217
AGMAT_1	AGMAT	2000	1595	1864
AGMAT_2	AGMAT	4966	4589	4635
AGMAT_3	AGMAT	1526	1640	1811
AGMAT_4	AGMAT	3166	3263	3395
AGMO_1	AGMO	3282	2838	3244
AGMO_2	AGMO	1903	2109	2033
AGMO_3	AGMO	1367	1379	1273
AGMO_4	AGMO	3204	2793	2602
AGO1_1	AGO1	1202	1375	1276
AGO1_2	AGO1	2172	1898	1835
AGO1_3	AGO1	3025	2453	2859
AGO1_4	AGO1	2749	2370	2411
AGO2_1	AGO2	2702	2806	2935
AGO2_2	AGO2	543	583	444
AGO2_3	AGO2	2294	1653	1807
AGO2_4	AGO2	1373	1627	1466
AGO3_1	AGO3	1867	1571	1381
AGO3_2	AGO3	2439	2184	2305
AGO3_3	AGO3	970	978	1034
AGO3_4	AGO3	2813	2544	2535
AGO4_1	AGO4	2118	2084	1980
AGO4_2	AGO4	1574	1392	1504
AGO4_3	AGO4	1602	1867	1924
AGO4_4	AGO4	2127	1851	1969
AGPAT1_1	AGPAT1	698	592	631
AGPAT1_2	AGPAT1	471	479	672
AGPAT1_3	AGPAT1	1300	1080	1233
AGPAT1_4	AGPAT1	1775	1673	1639
AGPAT2_1	AGPAT2	3488	2505	2647
AGPAT2_2	AGPAT2	2520	2379	2303
AGPAT2_3	AGPAT2	4402	3645	3163
AGPAT2_4	AGPAT2	3186	2681	2531
AGPAT3_1	AGPAT3	1865	1894	2128
AGPAT3_2	AGPAT3	3301	2889	3238
AGPAT3_3	AGPAT3	1513	1447	1537
AGPAT3_4	AGPAT3	2184	1472	1544
AGPAT4_1	AGPAT4	5960	6307	6271
AGPAT4_2	AGPAT4	2090	1564	1633
AGPAT4_3	AGPAT4	2428	2234	2395
AGPAT4_4	AGPAT4	2206	2019	2310
AGPAT5_1	AGPAT5	2415	2317	2229
AGPAT5_2	AGPAT5	2827	3074	3036
AGPAT5_3	AGPAT5	2183	2157	2368
AGPAT5_4	AGPAT5	2694	2530	2633
AGPAT6_1	AGPAT6	1764	1822	1977
AGPAT6_2	AGPAT6	2117	1816	2006
AGPAT6_3	AGPAT6	1262	1193	1321
AGPAT6_4	AGPAT6	2223	1997	1892
AGPAT9_1	AGPAT9	2108	1766	1908
AGPAT9_2	AGPAT9	1250	1219	1377
AGPAT9_3	AGPAT9	5510	4474	4617
AGPAT9_4	AGPAT9	5086	4316	4752
AGPS_1	AGPS	1747	1387	1431
AGPS_2	AGPS	1749	1917	1754
AGPS_3	AGPS	2120	2011	2432
AGPS_4	AGPS	1744	1689	1610
AGR2_1	AGR2	2570	2422	2924
AGR2_2	AGR2	1852	1407	1607
AGR2_3	AGR2	2350	2256	2527
AGR2_4	AGR2	1670	1948	1914
AGR3_1	AGR3	2216	3188	3172
AGR3_2	AGR3	2598	2495	2466
AGR3_3	AGR3	3056	3040	3109
AGR3_4	AGR3	2133	1825	2033
AGRN_1	AGRN	1873	2005	2083
AGRN_2	AGRN	3193	3313	3295
AGRN_3	AGRN	1217	986	897
AGRN_4	AGRN	2870	2939	2847
AGRP_1	AGRP	2378	2601	2604
AGRP_2	AGRP	2179	2307	2501
AGRP_3	AGRP	1743	1560	1410
AGRP_4	AGRP	1528	1316	1365
AGT_1	AGT	1424	1419	1649
AGT_2	AGT	1166	1219	1266
AGT_3	AGT	205	202	206
AGT_4	AGT	2668	2114	2548
AGTPBP1_1	AGTPBP1	1754	1881	1853
AGTPBP1_2	AGTPBP1	1783	1645	1450
AGTPBP1_3	AGTPBP1	1853	1846	1662
AGTPBP1_4	AGTPBP1	1317	1438	1363
AGTR1_1	AGTR1	1270	1207	1223
AGTR1_2	AGTR1	719	685	758
AGTR1_3	AGTR1	1678	1467	1624
AGTR1_4	AGTR1	1985	1939	1968
AGTR2_1	AGTR2	2917	3390	3950
AGTR2_2	AGTR2	1469	1203	1396
AGTR2_3	AGTR2	2699	1916	1838
AGTR2_4	AGTR2	2792	2338	2366
AGTRAP_1	AGTRAP	2910	3069	2960
AGTRAP_2	AGTRAP	3294	2901	3017
AGTRAP_3	AGTRAP	781	930	897
AGTRAP_4	AGTRAP	1243	1141	1235
AGXT_1	AGXT	1063	923	1153
AGXT_2	AGXT	2636	2833	3095
AGXT_3	AGXT	2913	2452	2487
AGXT_4	AGXT	3017	3012	3032
AGXT2_1	AGXT2	2779	2477	2281
AGXT2_2	AGXT2	3553	3408	3249
AGXT2_3	AGXT2	3922	4086	4211
AGXT2_4	AGXT2	2736	2472	2822
AHCTF1_1	AHCTF1	2238	2225	2369
AHCTF1_2	AHCTF1	1053	992	840
AHCTF1_3	AHCTF1	861	810	868
AHCTF1_4	AHCTF1	203	286	203
AHCY_1	AHCY	942	1239	1091
AHCY_2	AHCY	1666	1716	2186
AHCY_3	AHCY	1740	1625	1431
AHCY_4	AHCY	1246	1206	1297
AHCYL1_1	AHCYL1	896	718	966
AHCYL1_2	AHCYL1	1708	1540	1517
AHCYL1_3	AHCYL1	1266	1403	1326
AHCYL1_4	AHCYL1	1086	1006	1039
AHCYL2_1	AHCYL2	3918	3254	3143
AHCYL2_2	AHCYL2	2504	1930	2180
AHCYL2_3	AHCYL2	1465	1552	1269
AHCYL2_4	AHCYL2	2365	2248	2338
AHDC1_1	AHDC1	1630	2224	2352
AHDC1_2	AHDC1	1002	1221	1071
AHDC1_3	AHDC1	741	761	661
AHDC1_4	AHDC1	2328	1858	2039
AHI1_1	AHI1	2635	2078	2315
AHI1_2	AHI1	1534	1283	1329
AHI1_3	AHI1	2578	2021	2240
AHI1_4	AHI1	2749	2577	2689
AHNAK_1	AHNAK	3928	3276	3546
AHNAK_2	AHNAK	2453	2468	2641
AHNAK_3	AHNAK	2798	2593	2868
AHNAK_4	AHNAK	2889	2985	2970
AHNAK2_1	AHNAK2	4898	4286	5210
AHNAK2_2	AHNAK2	2590	2047	1933
AHNAK2_3	AHNAK2	2828	2798	2942
AHNAK2_4	AHNAK2	747	1068	1050
AHR_1	AHR	4168	4715	5096
AHR_2	AHR	4836	5312	5478
AHR_3	AHR	2796	2199	2293
AHR_4	AHR	3992	3584	3641
AHRR_1	AHRR	475	348	406
AHRR_2	AHRR	3005	2603	2551
AHRR_3	AHRR	3796	3104	3509
AHRR_4	AHRR	3117	2536	2653
AHSA1_1	AHSA1	2974	2562	2682
AHSA1_2	AHSA1	1579	1419	1670
AHSA1_3	AHSA1	2765	2252	2237
AHSA1_4	AHSA1	1765	1625	1655
AHSA2_1	AHSA2	2091	2240	2322
AHSA2_2	AHSA2	3415	2906	2892
AHSA2_3	AHSA2	1598	1384	1416
AHSA2_4	AHSA2	2312	2107	2310
AHSG_1	AHSG	2259	2239	2518
AHSG_2	AHSG	1723	1770	2004
AHSG_3	AHSG	3444	3607	3545
AHSG_4	AHSG	2818	2299	2457
AHSP_1	AHSP	1493	1710	1532
AHSP_2	AHSP	3766	3169	3622
AHSP_3	AHSP	4142	3822	3835
AHSP_4	AHSP	1494	1663	1742
AICDA_1	AICDA	2344	2060	2233
AICDA_2	AICDA	1460	1653	1750
AICDA_3	AICDA	2139	2082	2126
AICDA_4	AICDA	4357	3314	3580
AIDA_1	AIDA	2643	2661	3230
AIDA_2	AIDA	3609	2889	3057
AIDA_3	AIDA	1628	1661	1919
AIDA_4	AIDA	1127	1159	1097
AIF1_1	AIF1	3044	3426	3475
AIF1_2	AIF1	2939	2927	2900
AIF1_3	AIF1	1847	1581	1878
AIF1_4	AIF1	1018	978	988
AIF1L_1	AIF1L	1907	1743	1657
AIF1L_2	AIF1L	2045	2078	2657
AIF1L_3	AIF1L	2126	2329	2383
AIF1L_4	AIF1L	1834	1770	1714
AIFM1_1	AIFM1	3733	3127	3300
AIFM1_2	AIFM1	2624	1850	2154
AIFM1_3	AIFM1	2929	2629	2728
AIFM1_4	AIFM1	2086	1946	2102
AIFM2_1	AIFM2	5369	4895	4354
AIFM2_2	AIFM2	4404	3836	4144
AIFM2_3	AIFM2	1524	1507	1708
AIFM2_4	AIFM2	1617	1330	1256
AIFM3_1	AIFM3	1611	1480	1501
AIFM3_2	AIFM3	1790	1638	1903
AIFM3_3	AIFM3	662	576	488
AIFM3_4	AIFM3	1004	1019	1194
AIG1_1	AIG1	2056	2214	2241
AIG1_2	AIG1	1986	2153	2292
AIG1_3	AIG1	2143	2123	2207
AIG1_4	AIG1	656	687	658
AIM1_1	AIM1	1106	1027	1042
AIM1_2	AIM1	1725	2046	1995
AIM1_3	AIM1	2971	3099	2865
AIM1_4	AIM1	2082	1636	1807
AIM1L_1	AIM1L	2042	2035	1972
AIM1L_2	AIM1L	2019	2043	1817
AIM1L_3	AIM1L	2480	2653	2455
AIM1L_4	AIM1L	1805	1820	1616
AIM2_1	AIM2	5134	4060	4143
AIM2_2	AIM2	1457	1379	1546
AIM2_3	AIM2	3405	3340	3360
AIM2_4	AIM2	3400	2552	3092
AIMP1_1	AIMP1	2480	2729	2922
AIMP1_2	AIMP1	2127	1986	1819
AIMP1_3	AIMP1	2118	1839	1763
AIMP1_4	AIMP1	2110	2262	2248
AIMP2_1	AIMP2	2178	1987	2193
AIMP2_2	AIMP2	412	401	431
AIMP2_3	AIMP2	2437	2424	2119
AIMP2_4	AIMP2	2764	2296	2347
AIP_1	AIP	2600	3032	3180
AIP_2	AIP	4859	5523	5697
AIP_3	AIP	3059	2387	2652
AIP_4	AIP	1976	1857	2160
AIPL1_1	AIPL1	1885	1927	1868
AIPL1_2	AIPL1	1688	1439	1692
AIPL1_3	AIPL1	3347	3283	3207
AIPL1_4	AIPL1	1364	1222	1127
AIRE_1	AIRE	1625	1634	1573
AIRE_2	AIRE	2450	2008	1989
AIRE_3	AIRE	3143	2619	2608
AIRE_4	AIRE	2020	2097	2480
AJAP1_1	AJAP1	1297	1007	923
AJAP1_2	AJAP1	3269	3552	3303
AJAP1_3	AJAP1	2875	3098	3103
AJAP1_4	AJAP1	2211	2325	2399
AJUBA_1	AJUBA	2006	1670	1639
AJUBA_2	AJUBA	3545	3564	3729
AJUBA_3	AJUBA	1769	2226	2096
AJUBA_4	AJUBA	3189	2970	3173
AK1_1	AK1	2639	2628	2957
AK1_2	AK1	2287	2236	2666
AK1_3	AK1	1961	1674	1988
AK1_4	AK1	3716	3149	3357
AK2_1	AK2	1298	1085	1313
AK2_2	AK2	1667	1441	1343
AK2_3	AK2	537	530	716
AK2_4	AK2	1304	1167	1254
AK3_1	AK3	3046	3277	3245
AK3_2	AK3	5019	4470	4700
AK3_3	AK3	1738	1709	1658
AK3_4	AK3	2027	2117	1893
AK4_1	AK4	1835	2005	2156
AK4_2	AK4	3777	3231	3664
AK4_3	AK4	563	500	414
AK4_4	AK4	728	633	750
AK5_1	AK5	1898	2034	2297
AK5_2	AK5	1525	1206	1236
AK5_3	AK5	2662	2622	2363
AK5_4	AK5	3685	3268	3559
AK6_1	AK6	1604	1291	1438
AK6_2	AK6	733	509	686
AK6_3	AK6	1224	1121	1272
AK6_4	AK6	491	623	674
AK7_1	AK7	2210	2473	2596
AK7_2	AK7	3614	3734	3971
AK7_3	AK7	1888	1817	2136
AK7_4	AK7	3230	2915	2673
AK8_1	AK8	3576	3284	3552
AK8_2	AK8	1406	1440	1619
AK8_3	AK8	1719	1367	1324
AK8_4	AK8	1087	1107	1100
AK9_1	AK9	1954	2475	2367
AK9_2	AK9	1894	1666	1849
AK9_3	AK9	2354	2024	2159
AK9_4	AK9	1047	1216	1155
AKAP1_1	AKAP1	1203	1325	1305
AKAP1_2	AKAP1	1672	1731	1873
AKAP1_3	AKAP1	2524	2557	2651
AKAP1_4	AKAP1	3001	2504	2882
AKAP10_1	AKAP10	1686	1274	1450
AKAP10_2	AKAP10	2142	2317	2208
AKAP10_3	AKAP10	3788	2438	2488
AKAP10_4	AKAP10	1499	1686	1710
AKAP11_1	AKAP11	2365	1786	2007
AKAP11_2	AKAP11	2674	2620	2819
AKAP11_3	AKAP11	1842	1946	1956
AKAP11_4	AKAP11	1902	1639	1762
AKAP12_1	AKAP12	2223	2087	2097
AKAP12_2	AKAP12	1392	1314	1438
AKAP12_3	AKAP12	1892	1877	1900
AKAP12_4	AKAP12	3548	2537	2851
AKAP13_1	AKAP13	1435	1452	1660
AKAP13_2	AKAP13	2493	2280	2651
AKAP13_3	AKAP13	2627	2455	2495
AKAP13_4	AKAP13	1045	886	1161
AKAP14_1	AKAP14	2342	2010	2001
AKAP14_2	AKAP14	1549	1251	1203
AKAP14_3	AKAP14	1817	1820	2020
AKAP14_4	AKAP14	1747	1740	1391
AKAP17A_1	AKAP17A	4274	4451	4599
AKAP17A_2	AKAP17A	2238	2248	2413
AKAP17A_3	AKAP17A	2810	2157	2393
AKAP17A_4	AKAP17A	2566	2870	3227
AKAP2_1	AKAP2	1640	1494	1673
AKAP2_2	AKAP2	1740	1321	1447
AKAP2_3	AKAP2	444	323	257
[truncated: 75,442 more rows]

## Sheet: B. TICS donor 2
sgRNA	YM_MDA_alone_2	YM_MDA_Lymphocytes_donor 2	YM_MDA_lymphocytes_nivo_donor 2
A1BG_1	991.469	1026.2	1009.72
A1BG_2	332.188	549.479	417.157
A1BG_3	827.413	799.243	858.853
A1BG_4	1396.01	1160.86	1542.3
A1CF_1	623.617	958.874	780.693
A1CF_2	411.669	386.59	446.24
A1CF_3	954.786	831.82	912.475
A1CF_4	621.579	602.69	614.375
A2M_1	1194.25	1181.49	883.392
A2M_2	1634.45	1450.8	2022.17
A2M_3	4839.14	3781.2	3908.92
A2M_4	788.692	529.933	412.613
A2ML1_1	453.447	575.542	349.903
A2ML1_2	1043.44	1254.25	1300.55
A2ML1_3	514.586	528.847	513.494
A2ML1_4	546.174	754.72	688.9
A3GALT2_1	531.909	356.184	518.947
A3GALT2_2	692.908	598.346	726.163
A3GALT2_3	745.895	833.992	691.627
A3GALT2_4	894.666	906.749	818.864
A4GALT_1	1125.97	1003.4	989.726
A4GALT_2	812.129	823.133	707.077
A4GALT_3	2276.41	1981.82	1450.51
A4GALT_4	624.636	377.903	518.038
A4GNT_1	811.11	422.426	472.596
A4GNT_2	2089.93	1730.97	2018.53
A4GNT_3	3078.34	2715.9	1797.68
A4GNT_4	109.031	154.202	88.1574
AAAS_1	793.787	877.429	1082.43
AAAS_2	899.761	643.955	786.146
AAAS_3	3368.75	2945.04	2655.63
AAAS_4	829.451	1096.79	767.06
AACS_1	413.707	485.41	465.326
AACS_2	2421.1	2380.35	2180.31
AACS_3	2891.87	2907.03	2367.53
AACS_4	1714.95	1665.81	1288.73
AADAC_1	411.669	342.067	550.757
AADAC_2	436.124	363.786	287.193
AADAC_3	396.384	503.87	488.047
AADAC_4	463.637	403.965	399.889
AADACL2_1	155.904	125.968	239.025
AADACL2_2	874.286	1000.14	1155.13
AADACL2_3	473.827	444.144	588.019
AADACL2_4	2023.7	2614.91	2445.69
AADACL3_1	1248.25	1045.75	1011.54
AADACL3_2	534.965	562.51	958.825
AADACL3_3	1875.95	1343.29	1411.43
AADACL3_4	947.653	1192.35	1099.7
AADACL4_1	726.534	811.188	676.176
AADACL4_2	1110.69	788.383	1164.22
AADACL4_3	963.957	989.28	1140.59
AADACL4_4	23.4366	36.9215	55.4392
AADAT_1	527.833	605.948	533.489
AADAT_2	2066.5	1991.59	1740.43
AADAT_3	1219.72	1303.11	1559.57
AADAT_4	1094.39	630.924	542.577
AAED1_1	304.676	487.581	553.483
AAED1_2	2589.23	2276.1	2432.96
AAED1_3	848.812	986.022	1044.26
AAED1_4	445.295	615.721	374.442
AAGAB_1	2877.6	1493.15	2399.34
AAGAB_2	957.843	1017.51	1183.31
AAGAB_3	985.355	1236.87	991.544
AAGAB_4	763.217	963.218	687.082
AAK1_1	1376.64	1690.79	1612.28
AAK1_2	2580.06	1433.42	2298.45
AAK1_3	484.016	523.417	442.605
AAK1_4	843.717	961.046	1179.67
AAMDC_1	329.131	484.324	460.781
AAMDC_2	906.894	717.798	895.207
AAMDC_3	678.642	692.822	655.273
AAMDC_4	1245.2	1379.13	975.184
AAMP_1	531.909	329.036	525.309
AAMP_2	501.339	392.02	551.665
AAMP_3	555.345	822.047	385.348
AAMP_4	162.018	144.428	266.29
AANAT_1	1216.66	715.626	1224.21
AANAT_2	3920.02	2817.98	3479.04
AANAT_3	908.932	1065.29	1292.37
AANAT_4	877.343	848.109	862.488
AAR2_1	759.141	1120.68	760.698
AAR2_2	943.577	1501.84	946.102
AAR2_3	480.959	665.674	415.34
AAR2_4	956.824	398.535	1021.54
AARD_1	3671.39	2529.12	3511.75
AARD_2	540.06	582.057	556.21
AARD_3	303.657	409.395	328.091
AARD_4	318.941	407.223	376.259
AARS_1	488.092	395.278	413.522
AARS_2	443.257	172.662	286.284
AARS_3	941.539	927.382	1193.31
AARS_4	400.46	104.249	199.036
AARS2_1	1948.29	2051.32	1948.55
AARS2_2	1352.19	1072.9	1086.97
AARS2_3	886.514	827.477	1265.1
AARS2_4	1038.34	1556.13	1147.86
AARSD1_1	3256.67	3066.66	2963.72
AARSD1_2	1050.57	831.82	925.198
AARSD1_3	706.154	794.899	872.486
AARSD1_4	2333.47	2459.63	2309.36
AASDH_1	906.894	627.666	898.842
AASDH_2	657.243	983.85	826.135
AASDH_3	2013.51	2239.18	1992.18
AASDH_4	1263.54	1212.98	1183.31
AASDHPPT_1	957.843	771.008	1185.13
AASDHPPT_2	201.758	268.224	319.003
AASDHPPT_3	1077.06	1158.68	1215.12
AASDHPPT_4	880.4	1391.07	1662.27
AASS_1	564.516	269.31	363.536
AASS_2	1042.42	1538.76	1401.43
AASS_3	954.786	730.829	737.069
AASS_4	1090.31	1358.5	1278.74
AATF_1	2507.71	1235.79	2781.96
AATF_2	72.3477	89.046	62.7099
AATF_3	456.504	464.777	478.049
AATF_4	311.808	690.65	273.561
AATK_1	1250.29	1030.55	1416.88
AATK_2	248.632	238.904	254.475
AATK_3	1035.29	996.881	1057.89
AATK_4	1375.63	929.554	722.527
ABAT_1	993.507	769.923	1323.27
ABAT_2	1385.82	1773.32	1694.99
ABAT_3	1724.12	1451.88	1418.7
ABAT_4	631.769	585.315	764.334
ABCA1_1	428.991	400.707	293.555
ABCA1_2	422.877	270.396	442.605
ABCA1_3	1596.74	1117.42	1164.22
ABCA1_4	892.628	1037.06	937.922
ABCA10_1	776.464	607.033	711.621
ABCA10_2	1252.33	1332.43	1546.84
ABCA10_3	197.682	247.591	169.044
ABCA10_4	162.018	331.208	109.061
ABCA12_1	435.105	397.449	571.66
ABCA12_2	350.53	663.502	665.27
ABCA12_3	503.377	331.208	454.42
ABCA12_4	1006.75	780.782	1036.08
ABCA13_1	942.558	1143.48	1335.08
ABCA13_2	941.539	1229.27	1072.43
ABCA13_3	1357.28	955.616	1328.72
ABCA13_4	455.485	408.309	414.431
ABCA2_1	1952.37	1717.94	1993.08
ABCA2_2	93.7463	125.968	76.3425
ABCA2_3	1721.06	1723.37	1816.77
ABCA2_4	1128.01	1884.08	1386.89
ABCA3_1	990.45	1784.18	1625.91
ABCA3_2	1290.03	914.351	717.074
ABCA3_3	1830.09	1120.68	1734.97
ABCA3_4	1403.14	1125.02	1170.58
ABCA4_1	815.185	340.981	608.922
ABCA4_2	1048.53	696.079	740.704
ABCA4_3	126.354	66.2416	122.693
ABCA4_4	2239.72	1750.52	2163.04
ABCA5_1	468.732	394.192	659.817
ABCA5_2	300.6	256.279	313.55
ABCA5_3	72.3477	82.5305	83.6132
ABCA5_4	1404.16	1552.88	1481.41
ABCA6_1	6467.48	6719.72	6223.73
ABCA6_2	6081.28	5205.94	7018.06
ABCA6_3	1193.23	1299.86	981.546
ABCA6_4	226.214	226.959	522.583
ABCA7_1	963.957	662.416	442.605
ABCA7_2	1174.89	1367.18	1303.28
ABCA7_3	2802.2	2520.44	2311.18
ABCA7_4	1158.58	1338.95	1033.35
ABCA8_1	229.271	264.966	210.851
ABCA8_2	541.079	686.306	511.676
ABCA8_3	1016.94	800.329	843.403
ABCA8_4	951.729	1123.93	1084.25
ABCA9_1	267.992	378.989	395.345
ABCA9_2	1013.89	778.61	727.071
ABCA9_3	1482.62	1662.55	1602.28
ABCA9_4	182.398	134.655	132.691
ABCB1_1	936.444	818.789	1004.27
ABCB1_2	1855.57	1999.19	1948.55
ABCB1_3	312.827	351.84	320.82
ABCB1_4	603.237	1102.22	481.685
ABCB10_1	1422.5	1556.13	1138.78
ABCB10_2	424.915	264.966	297.19
ABCB10_3	533.946	515.816	491.682
ABCB10_4	646.035	599.432	566.207
ABCB11_1	714.306	560.339	327.182
ABCB11_2	588.972	870.914	415.34
ABCB11_3	2199.98	2336.92	2213.93
ABCB11_4	367.852	547.307	643.458
ABCB4_1	831.489	1043.58	1759.51
ABCB4_2	914.027	352.926	448.058
ABCB4_3	81.5185	105.335	88.1574
ABCB4_4	515.605	603.776	692.535
ABCB5_1	356.644	496.269	516.221
ABCB5_2	1021.02	1427.99	1072.43
ABCB5_3	365.814	474.55	549.848
ABCB5_4	759.141	1024.03	920.654
ABCB6_1	984.336	1013.17	1274.19
ABCB6_2	1090.31	1381.3	1563.2
ABCB6_3	1148.39	1233.61	851.582
ABCB6_4	874.286	793.813	837.041
ABCB7_1	657.243	710.197	693.444
ABCB7_2	1302.26	1459.49	2604.73
ABCB7_3	974.147	482.152	658.908
ABCB7_4	508.472	575.542	612.558
ABCB8_1	374.985	455.004	215.395
ABCB8_2	478.921	625.494	528.944
ABCB8_3	1224.82	1205.38	1156.04
ABCB8_4	312.827	387.676	470.779
ABCB9_1	2153.11	1419.31	1985.81
ABCB9_2	1135.15	611.377	717.074
ABCB9_3	2108.27	1581.11	1094.24
ABCB9_4	496.244	539.706	475.323
ABCC1_1	546.174	522.331	518.038
ABCC1_2	1124.96	930.64	1262.38
ABCC1_3	516.624	490.839	396.254
ABCC1_4	266.973	414.824	247.204
ABCC10_1	139.601	166.147	149.05
ABCC10_2	709.211	852.453	541.668
ABCC10_3	816.204	788.383	557.118
ABCC10_4	263.916	370.301	608.013
ABCC11_1	1408.23	681.962	1116.05
ABCC11_2	331.169	177.006	157.229
ABCC11_3	1324.68	1518.13	1462.32
ABCC11_4	231.309	369.215	279.922
ABCC12_1	406.574	367.043	806.14
ABCC12_2	242.518	276.911	373.533
ABCC12_3	518.662	623.322	568.024
ABCC12_4	1235.01	951.272	1049.71
ABCC2_1	1607.95	911.093	1827.68
ABCC2_2	1685.4	2222.89	843.403
ABCC2_3	1005.74	1100.04	941.557
ABCC2_4	1163.68	725.4	1099.7
ABCC3_1	1838.24	2156.65	2307.54
ABCC3_2	1088.27	1038.15	988.817
ABCC3_3	861.04	914.351	818.864
ABCC3_4	661.319	313.833	407.16
ABCC4_1	1636.48	1628.89	1850.4
ABCC4_2	3098.72	2119.73	2565.65
ABCC4_3	628.712	662.416	528.036
ABCC4_4	2006.38	1409.53	2243.02
ABCC5_1	488.092	934.984	648.002
ABCC5_2	403.517	347.497	478.049
ABCC5_3	339.321	326.864	311.732
ABCC5_4	277.163	286.685	289.92
ABCC6_1	1311.43	1382.39	1306
ABCC6_2	504.396	553.823	633.461
ABCC6_3	539.041	376.817	441.696
ABCC6_4	2584.14	2417.27	2495.67
ABCC8_1	3409.51	3102.49	3739.87
ABCC8_2	1471.41	1101.13	1503.22
ABCC8_3	1025.1	838.336	815.229
ABCC8_4	1743.48	1778.75	1422.33
ABCC9_1	166.094	186.78	151.776
ABCC9_2	519.681	455.004	525.309
ABCC9_3	1772.01	1234.7	1317.82
ABCC9_4	768.312	875.258	799.778
ABCD1_1	328.112	371.387	295.373
ABCD1_2	1640.56	1901.46	1766.78
ABCD1_3	1873.91	1400.85	1370.53
ABCD1_4	622.598	571.198	701.624
ABCD2_1	1955.43	1562.65	1408.7
ABCD2_2	1409.25	1243.39	655.273
ABCD2_3	474.846	604.862	611.649
ABCD2_4	790.73	1128.28	1046.98
ABCD3_1	431.029	516.901	570.751
ABCD3_2	581.839	665.674	533.489
ABCD3_3	592.028	671.103	815.229
ABCD3_4	695.965	830.734	588.019
ABCD4_1	759.141	685.22	779.784
ABCD4_2	2327.35	2001.36	1724.07
ABCD4_3	336.264	481.066	414.431
ABCD4_4	568.592	1368.27	836.132
ABCE1_1	611.389	546.221	927.925
ABCE1_2	587.953	472.378	398.98
ABCE1_3	394.346	469.121	187.221
ABCE1_4	419.821	339.895	612.558
ABCF1_1	930.33	868.742	882.483
ABCF1_2	415.745	182.436	497.135
ABCF1_3	714.306	513.644	597.107
ABCF1_4	230.29	259.537	243.569
ABCF2_1	270.03	433.285	286.284
ABCF2_2	4124.84	2833.18	2761.05
ABCF2_3	967.014	1080.5	812.502
ABCF2_4	491.149	751.462	707.986
ABCF3_1	1030.19	601.604	612.558
ABCF3_2	1681.32	1938.38	1555.93
ABCF3_3	750.99	861.14	857.035
ABCF3_4	1224.82	2293.48	2164.85
ABCG1_1	1793.41	1028.37	1352.35
ABCG1_2	217.043	245.42	239.934
ABCG1_3	15.2847	28.2341	21.8121
ABCG1_4	815.185	790.555	838.859
ABCG2_1	141.638	166.147	323.547
ABCG2_2	341.359	372.473	355.356
ABCG2_3	1032.23	712.368	1257.83
ABCG2_4	1523.38	440.887	961.552
ABCG4_1	2885.76	2347.78	2266.64
ABCG4_2	337.283	449.574	308.096
ABCG4_3	518.662	562.51	802.505
ABCG4_4	2348.75	1952.5	1560.48
ABCG5_1	394.346	497.355	707.986
ABCG5_2	595.085	680.877	700.715
ABCG5_3	830.47	786.211	1086.97
ABCG5_4	1267.61	1194.52	1078.79
ABCG8_1	1162.66	1195.61	1414.15
ABCG8_2	711.249	725.4	648.911
ABCG8_3	300.6	250.849	224.483
ABCG8_4	343.397	585.315	444.422
ABHD1_1	213.986	234.56	249.022
ABHD1_2	535.984	359.442	221.757
ABHD1_3	789.711	496.269	787.055
ABHD1_4	985.355	969.733	966.096
ABHD10_1	1078.08	714.54	1417.79
ABHD10_2	716.344	762.321	522.583
ABHD10_3	883.457	1184.75	990.635
ABHD10_4	799.901	849.195	872.486
ABHD11_1	761.179	840.508	666.179
ABHD11_2	1478.54	1588.71	1402.34
ABHD11_3	290.41	165.061	266.29
ABHD11_4	1196.28	1051.18	1031.53
ABHD12_1	1615.09	1484.46	1788.6
ABHD12_2	410.65	683.048	566.207
ABHD12_3	2368.11	730.829	1838.58
ABHD12_4	955.805	1058.78	953.372
ABHD12B_1	724.496	1105.47	1276.92
ABHD12B_2	856.964	1522.47	1590.47
ABHD12B_3	307.733	371.387	264.472
ABHD12B_4	640.94	515.816	652.547
ABHD13_1	1258.44	1544.19	1040.62
ABHD13_2	891.609	904.578	508.95
ABHD13_3	1146.35	1305.28	1067.89
ABHD13_4	337.283	459.347	387.165
ABHD14A_1	977.204	735.173	769.787
ABHD14A_2	2218.32	1539.85	1974.91
ABHD14A_3	530.89	531.019	573.478
ABHD14A_4	398.422	333.38	368.08
ABHD14B_1	215.005	248.677	276.287
ABHD14B_2	404.536	334.466	309.005
ABHD14B_3	955.805	1342.21	868.85
ABHD14B_4	2103.18	1539.85	1537.76
ABHD15_1	2224.44	1847.16	2167.58
ABHD15_2	542.098	567.94	787.055
ABHD15_3	1078.08	1239.04	1240.57
ABHD15_4	1130.05	1411.71	1317.82
ABHD16A_1	3329.01	2724.59	2139.41
ABHD16A_2	555.345	463.691	489.864
ABHD16A_3	881.419	678.705	1177.86
ABHD16A_4	2217.3	1316.14	1795.87
ABHD16B_1	3313.73	3155.71	2313
ABHD16B_2	1176.92	1380.21	1367.8
ABHD16B_3	2489.37	2120.82	1999.45
ABHD16B_4	360.72	233.474	276.287
ABHD17A_1	647.053	587.487	424.428
ABHD17A_2	365.814	258.451	316.276
ABHD17A_3	923.198	1210.81	1029.71
ABHD17A_4	1702.72	1637.58	1130.6
ABHD17B_1	1235.01	961.046	1284.19
ABHD17B_2	501.339	769.923	684.356
ABHD17B_3	736.724	719.97	682.538
ABHD17B_4	273.087	299.716	204.489
ABHD17C_1	696.984	605.948	552.574
ABHD17C_2	1201.38	1022.94	1212.39
ABHD17C_3	1279.84	1098.96	1290.55
ABHD17C_4	28.5315	36.9215	28.174
ABHD2_1	2302.9	1632.15	1709.53
ABHD2_2	720.42	1002.31	557.118
ABHD2_3	592.028	583.143	685.265
ABHD2_4	296.524	477.808	301.735
ABHD3_1	1254.37	1292.25	1177.86
ABHD3_2	302.638	284.513	213.577
ABHD3_3	789.711	836.164	762.516
ABHD3_4	532.928	354.012	797.961
ABHD4_1	952.748	816.617	650.729
ABHD4_2	398.422	483.238	667.088
ABHD4_3	1297.16	1378.04	1309.64
ABHD4_4	1097.44	952.358	1151.5
ABHD5_1	440.2	481.066	614.375
ABHD5_2	1096.42	940.413	1563.2
ABHD5_3	879.381	959.96	580.748
ABHD5_4	253.726	245.42	269.925
ABHD6_1	1026.11	891.546	751.61
ABHD6_2	520.7	531.019	519.856
ABHD6_3	1531.53	2164.25	2157.58
ABHD6_4	1323.66	1413.88	717.983
ABHD8_1	184.436	173.748	225.392
ABHD8_2	2636.11	1561.56	2120.32
ABHD8_3	1104.58	1449.71	1595.01
ABHD8_4	434.086	394.192	435.334
ABI1_1	1448.99	1462.74	1746.79
ABI1_2	1071.97	1163.03	1097.88
ABI1_3	797.863	898.062	517.129
ABI1_4	2518.92	2184.89	2402.06
ABI2_1	294.486	327.95	485.32
ABI2_2	1413.33	1215.15	1172.4
ABI2_3	2380.34	2706.13	2658.35
ABI2_4	173.227	225.873	233.572
ABI3_1	466.694	604.862	547.121
ABI3_2	867.154	1104.39	879.756
ABI3_3	1340.98	1544.19	1719.52
ABI3_4	1252.33	951.272	1079.7
ABI3BP_1	252.708	299.716	377.168
ABI3BP_2	521.719	683.048	634.37
ABI3BP_3	136.544	135.741	113.605
ABI3BP_4	378.042	420.254	395.345
ABL1_1	1218.7	1235.79	866.124
ABL1_2	891.609	1072.9	1115.15
ABL1_3	278.182	274.74	208.124
ABL1_4	549.231	521.245	422.61
ABL2_1	434.086	528.847	548.03
ABL2_2	307.733	488.667	368.08
ABL2_3	925.236	805.758	1124.23
ABL2_4	1251.31	1266.19	1236.02
ABLIM1_1	663.357	611.377	811.593
ABLIM1_2	1119.86	958.874	1148.77
ABLIM1_3	163.037	163.975	196.309
ABLIM1_4	558.402	717.798	503.497
ABLIM2_1	724.496	528.847	542.577
ABLIM2_2	771.369	966.475	917.928
ABLIM2_3	1299.2	1003.4	901.568
ABLIM2_4	678.642	800.329	638.914
ABLIM3_1	2123.56	1459.49	1864.94
ABLIM3_2	753.028	831.82	638.005
ABLIM3_3	1569.23	1856.94	1335.08
ABLIM3_4	1332.83	876.343	1070.61
ABO_1	821.299	1121.76	1056.98
ABO_2	568.592	373.559	476.232
ABO_3	1519.3	980.592	1311.45
ABO_4	740.8	881.773	862.488
ABR_1	551.269	677.619	348.994
ABR_2	1314.49	1580.02	1378.71
ABR_3	515.605	578.799	411.704
ABR_4	560.44	737.345	682.538
ABRA_1	213.986	292.114	221.757
ABRA_2	305.695	292.114	283.558
ABRA_3	542.098	258.451	561.663
ABRA_4	1233.99	1338.95	1019.72
ABRACL_1	530.89	399.621	608.922
ABRACL_2	1169.79	1138.05	1142.41
ABRACL_3	510.51	510.386	644.367
ABRACL_4	986.374	1294.43	1045.17
ABT1_1	75.4047	110.765	127.237
ABT1_2	359.701	364.872	367.171
ABT1_3	133.487	193.295	179.95
ABT1_4	270.03	548.393	247.204
ABTB1_1	445.295	494.097	493.5
ABTB1_2	455.485	706.939	620.737
ABTB1_3	712.268	754.72	811.593
ABTB1_4	350.53	437.629	539.85
ABTB2_1	1014.91	1153.25	1269.65
ABTB2_2	3232.21	2708.3	2576.56
ABTB2_3	1246.21	907.835	1168.77
ABTB2_4	1146.35	999.053	983.364
ACAA1_1	951.729	1067.47	738.886
ACAA1_2	847.793	954.53	1136.05
ACAA1_3	2480.2	2119.73	3210.93
ACAA1_4	65.2148	36.9215	16.3591
ACAA2_1	1176.92	823.133	797.052
ACAA2_2	792.768	616.807	1104.24
ACAA2_3	1327.73	997.967	1291.46
ACAA2_4	280.22	375.731	262.655
ACACA_1	925.236	824.219	876.121
ACACA_2	766.274	836.164	675.268
ACACA_3	304.676	322.52	667.088
ACACA_4	525.795	515.816	598.016
ACACB_1	1372.57	600.518	567.116
ACACB_2	297.543	723.228	368.989
ACACB_3	1654.83	1973.13	2300.27
ACACB_4	786.654	527.761	552.574
ACAD10_1	739.781	777.524	791.599
ACAD10_2	223.157	294.286	197.218
ACAD10_3	2743.1	2548.67	2700.16
ACAD10_4	1339.96	726.485	1420.52
ACAD11_1	2340.6	1749.43	3160.94
ACAD11_2	440.2	549.479	423.519
ACAD11_3	1101.52	743.86	881.574
ACAD11_4	325.055	230.217	417.157
ACAD8_1	1300.22	1242.3	1327.81
ACAD8_2	659.281	702.595	691.627
ACAD8_3	885.495	1171.72	1603.19
ACAD8_4	852.888	795.985	667.088
ACAD9_1	2945.88	3189.37	2579.29
ACAD9_2	607.313	566.854	682.538
ACAD9_3	354.606	403.965	383.53
ACAD9_4	480.959	665.674	411.704
ACADL_1	1122.92	992.538	1662.27
ACADL_2	1284.94	1101.13	1093.33
ACADL_3	1037.32	1173.89	1259.65
ACADL_4	393.327	531.019	487.138
ACADM_1	456.504	759.063	691.627
ACADM_2	796.844	848.109	855.218
ACADM_3	1281.88	1466	1857.67
ACADM_4	1016.94	877.429	1348.72
ACADS_1	2252.97	2404.24	1719.52
ACADS_2	917.084	1584.37	1455.05
ACADS_3	1190.17	665.674	1066.07
ACADS_4	1872.89	1228.18	1882.21
ACADSB_1	2132.73	1734.23	2146.68
ACADSB_2	430.01	521.245	543.486
ACADSB_3	646.035	585.315	411.704
ACADSB_4	793.787	746.032	536.215
ACADVL_1	1639.54	2307.6	1983.09
ACADVL_2	338.302	508.214	449.875
ACADVL_3	905.875	1073.98	902.477
ACADVL_4	89.6704	132.483	135.417
ACAN_1	3401.36	3327.28	2979.17
ACAN_2	988.412	1246.64	1200.58
ACAN_3	883.457	630.924	863.397
ACAN_4	1386.83	1332.43	1172.4
ACAP1_1	230.29	221.529	244.478
ACAP1_2	2053.25	1620.2	1657.72
ACAP1_3	534.965	896.976	730.707
ACAP1_4	3156.81	2973.27	3345.44
ACAP2_1	444.276	578.799	375.351
ACAP2_2	206.853	221.529	139.961
ACAP2_3	1471.41	1460.57	1408.7
ACAP2_4	1077.06	913.265	1203.3
ACAP3_1	1394.99	1955.76	1541.39
ACAP3_2	1126.99	1150	1035.17
ACAP3_3	1329.77	1596.31	2016.71
ACAP3_4	749.971	975.163	773.422
ACAT1_1	1045.48	1050.09	1151.5
ACAT1_2	197.682	297.544	380.804
ACAT1_3	891.609	620.065	1716.8
ACAT1_4	1311.43	1254.25	1441.42
ACAT2_1	586.934	683.048	409.886
ACAT2_2	962.938	857.883	797.961
ACAT2_3	1282.9	1458.4	823.408
ACAT2_4	679.661	737.345	532.58
ACBD3_1	261.878	497.355	367.171
ACBD3_2	545.155	570.112	881.574
ACBD3_3	2162.28	1154.34	808.867
ACBD3_4	18.3417	38.0075	32.7182
ACBD4_1	702.079	766.665	700.715
ACBD4_2	1192.21	1207.55	1316.91
ACBD4_3	323.017	430.027	418.066
ACBD4_4	1085.22	1143.48	1166.04
ACBD5_1	328.112	348.583	332.635
ACBD5_2	773.407	926.296	746.157
ACBD5_3	643.997	744.946	616.193
ACBD5_4	864.097	629.838	727.98
ACBD6_1	1065.86	1838.48	1931.28
ACBD6_2	491.149	736.259	744.339
ACBD6_3	1337.92	1166.29	779.784
ACBD6_4	43.8162	98.8194	51.8038
ACBD7_1	865.116	1011	808.867
ACBD7_2	921.16	579.885	338.997
ACBD7_3	68.2718	72.7571	156.32
ACBD7_4	651.129	614.635	752.519
ACCS_1	2614.71	1598.49	1405.07
ACCS_2	1715.97	1117.42	1769.51
ACCS_3	350.53	216.1	711.621
ACCS_4	852.888	778.61	870.668
ACCSL_1	1283.92	1375.87	1235.11
ACCSL_2	1484.66	1382.39	1250.56
ACCSL_3	444.276	256.279	185.403
ACCSL_4	510.51	487.581	501.679
ACD_1	774.426	795.985	760.698
ACD_2	997.583	875.258	891.571
ACD_3	626.674	578.799	772.513
ACD_4	371.928	490.839	367.171
ACE_1	1057.7	629.838	659.817
ACE_2	2154.13	2180.54	1889.48
ACE_3	351.549	490.839	379.895
ACE_4	167.113	114.022	101.79
ACE2_1	2368.11	1859.11	2083.97
ACE2_2	1482.62	1362.84	1062.43
ACE2_3	178.322	325.778	282.649
ACE2_4	572.668	802.5	717.074
ACER1_1	904.856	681.962	725.254
ACER1_2	565.535	584.229	956.099
ACER1_3	782.578	1077.24	837.041
ACER1_4	1489.75	1575.68	1474.14
ACER2_1	349.511	406.137	320.82
ACER2_2	563.497	671.103	767.06
ACER2_3	360.72	350.755	352.63
ACER2_4	1211.57	1105.47	1401.43
ACER3_1	326.074	364.872	389.892
ACER3_2	2074.65	2222.89	1982.18
ACER3_3	459.561	539.706	551.665
ACER3_4	163.037	237.818	238.116
ACHE_1	355.625	327.95	333.544
ACHE_2	1500.96	945.843	1425.06
ACHE_3	605.275	801.414	892.48
ACHE_4	1368.49	1273.79	1385.07
ACIN1_1	1651.77	637.439	705.259
ACIN1_2	1849.45	1690.79	1797.68
ACIN1_3	524.776	633.096	965.187
ACIN1_4	581.839	369.215	334.453
ACKR1_1	670.49	446.316	525.309
ACKR1_2	768.312	382.246	393.527
ACKR1_3	1628.33	1689.7	1718.61
ACKR1_4	2192.85	1357.41	1535.94
ACKR2_1	4026	4110.24	4242.46
ACKR2_2	1974.79	1983.99	1858.58
ACKR2_3	893.647	889.375	725.254
ACKR2_4	1159.6	321.435	733.433
ACKR3_1	389.251	256.279	299.008
ACKR3_2	979.242	1156.51	1256.02
ACKR3_3	2156.17	2779.97	2475.68
ACKR3_4	3614.33	2676.81	3439.05
ACKR4_1	357.663	340.981	371.715
ACKR4_2	584.896	542.964	519.856
ACKR4_3	1541.72	1095.7	1684.99
ACKR4_4	2397.66	2141.45	1837.67
ACLY_1	755.066	663.502	797.961
ACLY_2	1685.4	1951.41	1727.7
ACLY_3	2964.22	2293.48	2814.67
ACLY_4	611.389	595.088	385.348
ACMSD_1	618.522	736.259	777.966
ACMSD_2	1548.85	639.611	1548.66
ACMSD_3	740.8	713.454	733.433
ACMSD_4	1662.98	2028.51	1909.47
ACO1_1	679.661	756.891	792.508
ACO1_2	196.664	207.412	187.221
ACO1_3	710.23	675.447	677.085
ACO1_4	2227.49	1874.31	1809.5
ACO2_1	458.542	519.073	526.218
ACO2_2	360.72	300.802	210.851
ACO2_3	916.065	1245.56	1270.56
ACO2_4	184.436	191.123	165.409
ACOT1_1	234.366	242.162	193.583
ACOT1_2	636.864	598.346	546.212
ACOT1_3	1600.82	1595.23	1591.38
ACOT1_4	435.105	395.278	398.072
ACOT11_1	2205.08	2223.98	1872.21
ACOT11_2	139.601	137.913	112.696
ACOT11_3	3251.57	1968.79	2571.11
ACOT11_4	592.028	433.285	486.229
ACOT12_1	1469.37	950.187	1217.84
ACOT12_2	1198.32	1444.28	1720.43
ACOT12_3	734.686	579.885	610.74
ACOT12_4	422.877	534.276	528.944
ACOT13_1	2249.91	1508.35	2036.71
ACOT13_2	532.928	685.22	365.353
ACOT13_3	1011.85	584.229	1225.12
ACOT13_4	1286.97	1188	806.14
ACOT2_1	784.616	613.549	763.425
ACOT2_2	1245.2	1434.51	1318.73
ACOT2_3	1049.55	1047.92	959.734
ACOT2_4	346.454	318.177	270.834
ACOT4_1	403.517	395.278	562.571
ACOT4_2	506.434	641.783	826.135
ACOT4_3	1064.84	837.25	991.544
ACOT4_4	1319.58	1333.52	1571.38
ACOT6_1	878.362	1007.74	1088.79
ACOT6_2	521.719	572.284	637.096
ACOT6_3	299.581	361.614	587.11
ACOT6_4	548.212	574.456	524.4
ACOT7_1	634.826	572.284	558.027
ACOT7_2	1573.31	1826.53	1994.9
ACOT7_3	1173.87	1206.47	1191.49
ACOT7_4	848.812	750.376	848.856
ACOT8_1	1473.45	756.891	1130.6
ACOT8_2	662.338	726.485	707.077
ACOT8_3	308.752	455.004	279.922
ACOT8_4	926.255	1120.68	984.273
ACOT9_1	612.408	449.574	820.682
ACOT9_2	2349.77	2245.7	2751.06
ACOT9_3	589.991	838.336	673.45
ACOT9_4	846.774	994.71	1023.35
ACOX1_1	532.928	514.73	546.212
ACOX1_2	748.952	651.556	417.157
ACOX1_3	44.8352	61.8979	66.3453
ACOX1_4	902.818	1073.98	991.544
ACOX2_1	1820.92	1420.39	1835.86
ACOX2_2	2059.36	1421.48	1769.51
ACOX2_3	1441.86	1044.66	709.803
ACOX2_4	1330.79	1380.21	1074.25
ACOX3_1	778.502	908.921	921.563
ACOX3_2	1463.26	1539.85	1459.6
ACOX3_3	1632.41	1724.45	1190.58
ACOX3_4	1057.7	1218.41	1261.47
ACOXL_1	319.96	503.87	342.632
ACOXL_2	493.187	397.449	568.933
ACOXL_3	544.136	645.041	580.748
ACOXL_4	1029.17	727.571	362.627
ACP1_1	693.927	526.675	660.726
ACP1_2	1532.55	1783.09	2009.44
ACP1_3	714.306	364.872	583.475
ACP1_4	321.998	322.52	349.903
ACP2_1	1345.06	1161.94	918.836
ACP2_2	3053.89	2819.07	2312.09
ACP2_3	1439.82	1689.7	1325.09
ACP2_4	610.37	650.471	574.386
ACP5_1	566.554	826.391	843.403
ACP5_2	2069.55	2005.71	1684.99
ACP5_3	1872.89	1608.26	1655
ACP5_4	1098.46	1313.97	784.328
ACP6_1	122.278	177.006	138.144
ACP6_2	2770.61	2636.63	1943.1
ACP6_3	707.173	622.236	449.875
ACP6_4	116.164	178.092	119.058
ACPP_1	1726.16	873.086	811.593
ACPP_2	660.3	849.195	777.058
ACPP_3	1668.07	1556.13	1944.01
ACPP_4	684.756	527.761	1049.71
ACPT_1	752.009	847.023	811.593
ACPT_2	2588.21	1689.7	1772.24
ACPT_3	765.255	813.36	662.544
ACPT_4	449.371	672.189	714.348
ACR_1	373.966	574.456	473.505
ACR_2	3455.37	3796.4	3217.29
ACR_3	292.448	297.544	267.199
ACR_4	1543.76	1050.09	1703.16
ACRBP_1	70.3097	74.929	55.4392
ACRBP_2	1763.86	1426.91	1383.25
ACRBP_3	433.067	350.755	440.787
ACRBP_4	927.273	1085.93	1051.53
ACRC_1	288.372	291.029	286.284
ACRC_2	1397.02	1733.14	1412.34
ACRC_3	1487.71	1575.68	1502.31
ACRC_4	171.189	280.169	164.5
ACRV1_1	3767.18	2659.44	2758.33
ACRV1_2	1432.69	1331.35	1239.66
ACRV1_3	1349.13	1333.52	1230.57
ACRV1_4	663.357	936.069	724.345
ACSBG1_1	765.255	470.207	530.762
ACSBG1_2	410.65	238.904	185.403
ACSBG1_3	215.005	260.623	508.041
ACSBG1_4	1110.69	1026.2	1177.86
ACSBG2_1	607.313	656.986	669.814
ACSBG2_2	1876.96	1591.97	1742.24
ACSBG2_3	415.745	401.793	499.862
ACSBG2_4	542.098	497.355	720.709
ACSF2_1	374.985	471.293	451.693
ACSF2_2	2095.03	1957.93	2430.24
ACSF2_3	949.691	636.353	812.502
ACSF2_4	472.808	533.19	543.486
ACSF3_1	3031.47	2911.37	2670.17
ACSF3_2	1907.53	1464.92	1799.5
ACSF3_3	1363.4	1287.91	1771.33
ACSF3_4	430.01	640.697	448.967
ACSL1_1	882.438	712.368	727.071
ACSL1_2	1416.38	866.57	1067.89
ACSL1_3	1428.61	1574.59	1896.75
ACSL1_4	101.898	152.03	132.691
ACSL3_1	221.119	204.154	365.353
ACSL3_2	156.923	106.421	192.674
ACSL3_3	387.213	245.42	358.991
ACSL3_4	417.783	319.263	393.527
ACSL4_1	510.51	398.535	677.085
ACSL4_2	579.801	577.713	392.619
ACSL4_3	1464.28	1169.54	757.063
ACSL4_4	466.694	304.06	478.958
ACSL5_1	1232.97	1079.41	1338.72
ACSL5_2	798.882	787.297	807.049
ACSL5_3	878.362	1269.45	941.557
ACSL5_4	857.983	756.891	860.671
ACSL6_1	724.496	1095.7	664.361
ACSL6_2	790.73	926.296	790.69
ACSL6_3	413.707	780.782	362.627
ACSL6_4	996.564	1008.83	951.555
ACSM1_1	1297.16	589.659	835.223
ACSM1_2	514.586	752.548	562.571
ACSM1_3	1513.19	1561.56	1553.21
ACSM1_4	1117.82	1232.53	1048.8
ACSM2A_1	553.307	714.54	581.657
ACSM2A_2	1887.15	2256.56	1503.22
ACSM2A_3	1802.58	1248.82	1106.06
ACSM2A_4	774.426	950.187	741.613
ACSM2B_1	1290.03	1039.23	865.215
ACSM2B_2	434.086	553.823	872.486
ACSM2B_3	367.852	511.472	550.757
ACSM2B_4	178.322	218.271	309.005
ACSM3_1	355.625	439.801	369.898
ACSM3_2	126.354	136.827	139.961
ACSM3_3	1166.73	511.472	570.751
ACSM3_4	3349.39	2280.45	2328.45
ACSM4_1	2211.19	2638.8	1927.65
ACSM4_2	1694.57	2033.94	1639.55
ACSM4_3	69.2908	105.335	54.5304
ACSM4_4	4539.56	3609.62	4650.53
ACSM5_1	1045.48	1204.29	1046.98
ACSM5_2	194.626	217.185	179.95
ACSM5_3	784.616	799.243	1117.87
ACSM5_4	1233.99	1391.07	1154.23
ACSM6_1	703.097	650.471	527.127
ACSM6_2	2215.27	1496.41	1326.91
ACSM6_3	895.685	1131.54	757.972
ACSM6_4	1020	829.649	863.397
ACSS1_1	3406.46	1858.02	3222.74
ACSS1_2	1084.2	1279.22	1104.24
ACSS1_3	581.839	627.666	608.922
ACSS1_4	7.13287	1.08593	56.348
ACSS2_1	1381.74	1337.86	1405.97
ACSS2_2	1001.66	1183.66	1088.79
ACSS2_3	2143.94	1355.24	2033.07
ACSS2_4	188.512	354.012	367.171
ACSS3_1	752.009	784.04	667.997
ACSS3_2	302.638	358.356	366.262
ACSS3_3	892.628	1065.29	936.104
ACSS3_4	2257.04	681.962	1865.85
ACTA1_1	519.681	602.69	639.823
ACTA1_2	748.952	678.705	643.458
ACTA1_3	141.638	169.405	124.511
ACTA1_4	526.814	849.195	787.964
ACTA2_1	3842.58	2333.66	2962.82
ACTA2_2	85.5945	109.679	81.7955
ACTA2_3	1261.5	1000.14	1188.76
ACTA2_4	538.022	597.26	701.624
ACTB_1	121.259	198.725	163.591
ACTB_2	2498.54	1092.44	1285.1
ACTB_3	878.362	681.962	557.118
ACTB_4	447.333	514.73	455.328
ACTBL2_1	320.979	460.433	468.052
ACTBL2_2	66.2338	122.71	162.682
ACTBL2_3	323.017	294.286	309.914
ACTBL2_4	1875.95	1318.32	1684.08
ACTC1_1	1437.78	1566.99	1492.31
ACTC1_2	921.16	916.523	1179.67
ACTC1_3	1093.37	672.189	648.002
ACTC1_4	348.492	323.606	287.193
ACTG1_1	652.148	1151.08	894.298
ACTG1_2	279.201	375.731	267.199
ACTG1_3	606.294	817.703	588.019
ACTG1_4	1541.72	2120.82	1422.33
ACTG2_1	540.06	511.472	841.585
ACTG2_2	734.686	865.484	818.864
ACTG2_3	989.431	1246.64	832.497
ACTG2_4	3036.57	2289.14	2843.76
ACTL10_1	367.852	500.613	481.685
ACTL10_2	2420.08	1994.85	2740.15
ACTL10_3	2813.41	2688.76	2553.84
ACTL10_4	1231.95	1282.48	1218.75
ACTL6A_1	1051.59	971.905	1040.62
ACTL6A_2	296.524	325.778	236.298
ACTL6A_3	648.072	295.372	842.494
ACTL6A_4	762.198	297.544	548.03
ACTL6B_1	796.844	968.647	548.939
ACTL6B_2	570.63	832.906	635.279
ACTL6B_3	1793.41	1921.01	1665.9
ACTL6B_4	1327.73	867.656	797.052
ACTL7A_1	1032.23	991.452	862.488
ACTL7A_2	1129.03	913.265	506.223
ACTL7A_3	956.824	968.647	1210.57
ACTL7A_4	314.865	284.513	325.364
ACTL7B_1	998.602	857.883	953.372
ACTL7B_2	2206.1	2159.91	1766.78
ACTL7B_3	796.844	920.866	825.226
ACTL7B_4	967.014	1069.64	954.281
ACTL8_1	1136.16	1055.52	1039.71
ACTL8_2	142.657	190.037	310.823
ACTL8_3	3237.31	2551.93	1794.05
ACTL8_4	1178.96	1011	1067.89
ACTL9_1	4849.33	2850.56	2951.91
ACTL9_2	1681.32	1902.54	1974.91
ACTL9_3	700.041	937.155	738.886
ACTL9_4	388.232	496.269	472.596
ACTN1_1	1749.59	2179.46	1714.98
ACTN1_2	681.699	714.54	723.436
ACTN1_3	412.688	385.504	356.265
ACTN1_4	155.904	269.31	234.481
ACTN2_1	507.453	421.34	530.762
ACTN2_2	1132.09	874.172	1119.69
ACTN2_3	694.946	718.884	606.196
ACTN2_4	836.584	905.663	674.359
ACTN3_1	2198.96	1894.94	2053.07
ACTN3_2	913.008	356.184	555.301
ACTN3_3	528.852	544.05	739.795
ACTN3_4	314.865	324.692	268.108
ACTN4_1	515.605	685.22	791.599
ACTN4_2	811.11	664.588	830.679
ACTN4_3	356.644	282.341	359.9
ACTN4_4	376.004	469.121	486.229
ACTR10_1	1357.28	1598.49	1237.84
ACTR10_2	631.769	557.081	386.257
ACTR10_3	896.704	384.418	436.243
ACTR10_4	3088.53	1227.1	2946.46
ACTR1A_1	475.865	558.167	397.163
ACTR1A_2	1774.05	1391.07	1220.57
ACTR1A_3	213.986	355.098	438.969
ACTR1A_4	1947.27	994.71	997.905
ACTR1B_1	363.777	427.855	350.812
ACTR1B_2	779.521	872	1210.57
ACTR1B_3	216.024	496.269	398.072
ACTR1B_4	26.4935	13.0311	15.4503
ACTR2_1	523.757	522.331	365.353
ACTR2_2	284.296	362.7	280.831
ACTR2_3	570.63	787.297	825.226
ACTR2_4	2551.53	725.4	1581.38
ACTR3_1	183.417	280.169	249.022
ACTR3_2	376.004	298.63	416.248
ACTR3_3	1002.68	848.109	1031.53
ACTR3_4	582.858	394.192	677.085
ACTR3B_1	2284.56	1595.23	1037.89
ACTR3B_2	3042.68	2385.78	3521.75
ACTR3B_3	494.206	612.463	474.414
ACTR3B_4	1374.61	1342.21	1345.99
ACTR3C_1	956.824	1135.88	1579.56
ACTR3C_2	388.232	618.979	545.304
ACTR3C_3	5035.81	4399.09	3805.31
ACTR3C_4	492.168	588.573	497.135
ACTR5_1	1584.52	2036.11	1920.38
ACTR5_2	279.201	295.372	259.928
ACTR5_3	737.743	1105.47	647.094
ACTR5_4	350.53	301.888	330.817
ACTR6_1	1546.81	1271.62	1581.38
ACTR6_2	579.801	596.174	693.444
ACTR6_3	1822.96	1434.51	1536.85
ACTR6_4	25.4745	48.8667	49.9862
ACTR8_1	830.47	702.595	667.088
ACTR8_2	130.43	223.701	154.503
ACTR8_3	1279.84	771.008	2026.71
ACTR8_4	506.434	435.457	449.875
ACTRT1_1	1233.99	995.795	781.602
ACTRT1_2	1344.04	1078.33	1248.75
ACTRT1_3	234.366	306.232	274.469
ACTRT1_4	956.824	1125.02	1204.21
ACTRT2_1	2689.09	2306.51	3305.45
ACTRT2_2	1482.62	1241.22	1022.44
ACTRT2_3	316.903	355.098	330.817
ACTRT2_4	617.503	705.853	831.588
ACTRT3_1	621.579	595.088	593.472
ACTRT3_2	2040	2000.28	1989.45
ACTRT3_3	1220.74	1111.99	1310.55
ACTRT3_4	467.713	583.143	546.212
ACVR1_1	919.122	753.634	810.685
ACVR1_2	2365.06	1612.6	1653.18
ACVR1_3	279.201	159.631	278.105
ACVR1_4	1586.55	1479.03	1958.55
ACVR1B_1	130.43	195.467	180.859
ACVR1B_2	1157.56	1176.06	1335.99
ACVR1B_3	1118.84	1088.1	1390.52
ACVR1B_4	1181	703.681	1048.8
ACVR1C_1	230.29	158.545	309.005
ACVR1C_2	284.296	339.895	276.287
ACVR1C_3	468.732	477.808	450.784
ACVR1C_4	1102.54	1758.12	1420.52
ACVR2A_1	105.974	111.851	131.782
ACVR2A_2	348.492	375.731	622.555
ACVR2A_3	1185.08	1295.51	1087.88
ACVR2A_4	566.554	675.447	555.301
ACVR2B_1	2600.44	2397.73	1964
ACVR2B_2	1489.75	1062.04	1297.82
ACVR2B_3	122.278	115.108	108.152
ACVR2B_4	1020	1163.03	796.143
ACVRL1_1	797.863	905.663	1199.67
ACVRL1_2	1200.36	1237.96	1152.41
ACVRL1_3	1009.81	1085.93	708.895
ACVRL1_4	1390.91	1850.42	1038.8
ACY1_1	1246.21	810.102	989.726
ACY1_2	1585.54	1330.26	1639.55
ACY1_3	1327.73	1563.74	1121.51
ACY1_4	1129.03	923.038	1146.05
ACY3_1	1316.52	994.71	1400.52
ACY3_2	715.325	763.407	481.685
ACY3_3	627.693	1084.84	909.748
ACY3_4	1425.56	1303.11	976.093
ACYP1_1	2507.71	1918.83	2571.11
ACYP1_2	788.692	361.614	582.566
ACYP1_3	1010.83	1207.55	1029.71
ACYP1_4	612.408	610.291	717.074
ACYP2_1	1528.47	1178.23	949.737
ACYP2_2	2913.27	3283.84	2860.12
ACYP2_3	146.733	246.506	132.691
ACYP2_4	453.447	425.684	319.003
ADA_1	938.482	1078.33	1020.63
ADA_2	1404.16	738.431	595.29
ADA_3	688.832	700.423	714.348
ADA_4	2577.01	2092.58	3405.42
ADAD1_1	1100.5	1174.97	1104.24
ADAD1_2	588.972	839.422	880.665
ADAD1_3	951.729	1340.03	1399.61
ADAD1_4	1795.45	1983.99	1864.03
ADAD2_1	1753.67	1858.02	1335.99
ADAD2_2	1239.08	1310.71	1249.65
ADAD2_3	575.725	604.862	702.533
ADAD2_4	100.879	125.968	104.517
ADAL_1	530.89	384.418	372.624
ADAL_2	1292.07	1591.97	1582.29
ADAL_3	652.148	741.688	649.82
ADAL_4	349.511	401.793	392.619
ADAM10_1	1246.21	1191.26	1286.01
ADAM10_2	935.425	824.219	963.37
ADAM10_3	404.536	201.983	233.572
ADAM10_4	77.4426	93.3898	54.5304
ADAM11_1	584.896	809.016	702.533
ADAM11_2	447.333	560.339	548.939
ADAM11_3	1096.42	967.561	1052.44
ADAM11_4	712.268	729.743	1152.41
ADAM12_1	690.87	1171.72	693.444
ADAM12_2	931.349	1174.97	1121.51
ADAM12_3	1302.26	1119.59	1144.23
ADAM12_4	1942.18	1064.21	987.908
ADAM15_1	369.89	419.168	340.815
ADAM15_2	1489.75	1623.46	1756.79
ADAM15_3	1445.94	1629.98	1309.64
ADAM15_4	1371.55	1131.54	1120.6
ADAM17_1	933.387	954.53	788.872
ADAM17_2	1411.29	924.124	1104.24
ADAM17_3	1455.11	1176.06	1828.58
ADAM17_4	405.555	407.223	310.823
ADAM18_1	256.783	367.043	328.091
ADAM18_2	1310.41	1037.06	1076.97
ADAM18_3	920.141	1011	1096.97
ADAM18_4	1442.88	1271.62	2220.29
ADAM19_1	1583.5	1021.86	760.698
ADAM19_2	1006.75	1284.65	1111.51
ADAM19_3	2065.48	1487.72	1264.2
ADAM19_4	964.976	850.281	1135.14
ADAM2_1	1012.87	1134.79	1328.72
ADAM2_2	407.593	382.246	425.337
ADAM2_3	1841.3	1145.65	1494.13
ADAM2_4	199.72	263.88	298.099
ADAM20_1	1189.15	447.402	1113.33
ADAM20_2	1016.94	1107.65	984.273
ADAM20_3	426.953	526.675	448.058
ADAM20_4	4856.47	3099.24	4845.93
ADAM21_1	817.223	1066.38	1510.49
ADAM21_2	166.094	239.99	220.848
ADAM21_3	544.136	877.429	697.08
ADAM21_4	849.831	847.023	1021.54
ADAM22_1	855.945	849.195	604.378
ADAM22_2	485.035	637.439	590.745
ADAM22_3	1574.33	1869.97	2281.19
ADAM22_4	520.7	435.457	774.331
ADAM23_1	403.517	387.676	335.362
ADAM23_2	174.246	159.631	126.329
ADAM23_3	543.117	692.822	579.839
ADAM23_4	360.72	365.958	498.953
ADAM28_1	1343.02	1177.15	924.289
ADAM28_2	430.01	362.7	361.718
ADAM28_3	538.022	676.533	483.502
ADAM28_4	234.366	436.543	342.632
ADAM29_1	1427.59	1257.5	930.651
ADAM29_2	609.351	744.946	777.058
ADAM29_3	1046.49	776.438	980.637
ADAM29_4	667.433	910.007	796.143
ADAM30_1	439.181	447.402	444.422
ADAM30_2	870.211	1072.9	902.477
ADAM30_3	1412.31	1396.5	1738.61
ADAM30_4	568.592	377.903	250.84
ADAM32_1	616.484	639.611	707.077
ADAM32_2	5088.8	3440.22	3449.04
ADAM32_3	411.669	369.215	499.862
ADAM32_4	651.129	964.304	604.378
ADAM33_1	258.821	213.928	184.494
ADAM33_2	1282.9	1613.69	1202.39
ADAM33_3	228.252	309.489	434.425
ADAM33_4	174.246	152.03	115.423
ADAM7_1	320.979	262.794	561.663
ADAM7_2	1787.29	2157.74	2116.69
ADAM7_3	1406.19	1482.29	1246.02
ADAM7_4	1148.39	1160.86	1362.35
ADAM8_1	949.691	1067.47	825.226
ADAM8_2	519.681	549.479	414.431
ADAM8_3	2283.54	1850.42	2286.64
ADAM8_4	1869.83	2199	1797.68
ADAM9_1	513.567	507.128	792.508
ADAM9_2	568.592	660.244	695.262
ADAM9_3	817.223	864.398	633.461
ADAM9_4	485.035	520.159	476.232
ADAMDEC1_1	175.265	316.005	200.853
ADAMDEC1_2	986.374	917.609	849.765
ADAMDEC1_3	3335.13	2947.21	2827.4
ADAMDEC1_4	1565.16	1447.54	1343.26
ADAMTS1_1	1406.19	1542.02	2336.63
ADAMTS1_2	239.461	300.802	287.193
ADAMTS1_3	996.564	1422.56	1216.03
ADAMTS1_4	1401.1	1452.97	1339.63
ADAMTS10_1	924.217	913.265	1164.22
ADAMTS10_2	1183.04	1148.91	1420.52
ADAMTS10_3	703.097	532.104	594.381
ADAMTS10_4	610.37	675.447	546.212
ADAMTS12_1	1992.11	1658.21	1741.34
ADAMTS12_2	1935.05	1460.57	1686.81
ADAMTS12_3	1403.14	1171.72	1595.92
ADAMTS12_4	640.94	488.667	475.323
ADAMTS13_1	358.682	508.214	410.795
ADAMTS13_2	944.596	957.788	851.582
ADAMTS13_3	2325.32	1754.86	1419.61
ADAMTS13_4	473.827	641.783	597.107
ADAMTS14_1	1326.71	1257.5	1421.42
ADAMTS14_2	1160.62	933.898	907.022
ADAMTS14_3	830.47	718.884	1135.14
ADAMTS14_4	1328.75	1096.79	816.138
ADAMTS15_1	104.955	194.381	109.061
ADAMTS15_2	2753.29	2732.19	2899.2
ADAMTS15_3	2103.18	2360.81	2318.45
ADAMTS15_4	18472.1	10183.8	13288.1
ADAMTS16_1	521.719	626.58	804.323
ADAMTS16_2	471.789	590.745	545.304
ADAMTS16_3	765.255	547.307	828.861
ADAMTS16_4	529.871	723.228	794.325
ADAMTS17_1	10.1898	5.42964	10.9061
ADAMTS17_2	978.223	981.678	702.533
ADAMTS17_3	822.318	813.36	858.853
ADAMTS17_4	901.799	929.554	853.4
ADAMTS18_1	1229.91	919.781	1156.95
ADAMTS18_2	1785.26	2136.02	2228.47
ADAMTS18_3	1504.02	1059.87	1122.42
ADAMTS18_4	566.554	617.893	565.298
ADAMTS19_1	684.756	595.088	788.872
ADAMTS19_2	1215.65	1181.49	965.187
ADAMTS19_3	4124.84	3026.48	3863.48
ADAMTS19_4	730.61	953.444	857.944
ADAMTS2_1	623.617	805.758	515.312
ADAMTS2_2	895.685	849.195	1025.17
ADAMTS2_3	2054.27	1563.74	2028.53
ADAMTS2_4	283.277	203.068	219.03
ADAMTS20_1	1360.34	1065.29	1137.87
ADAMTS20_2	1743.48	1097.87	1035.17
ADAMTS20_3	2283.54	1615.86	2084.88
ADAMTS20_4	1077.06	984.936	1389.62
ADAMTS3_1	3193.49	3061.23	2909.19
ADAMTS3_2	1122.92	1336.78	1215.12
ADAMTS3_3	1772.01	2315.2	2062.16
ADAMTS3_4	240.48	142.256	103.608
ADAMTS4_1	444.276	318.177	354.447
ADAMTS4_2	226.214	325.778	295.373
ADAMTS4_3	676.604	502.784	701.624
ADAMTS4_4	1837.22	1587.63	1660.45
ADAMTS5_1	1391.93	1462.74	1509.58
ADAMTS5_2	3147.63	3372.89	2238.47
ADAMTS5_3	905.875	1164.11	1017.9
ADAMTS5_4	758.123	614.635	588.019
ADAMTS6_1	2867.41	2096.93	1736.79
ADAMTS6_2	389.251	394.192	501.679
ADAMTS6_3	722.458	823.133	793.417
ADAMTS6_4	448.352	397.449	449.875
ADAMTS7_1	1314.49	910.007	848.856
ADAMTS7_2	1012.87	569.026	769.787
ADAMTS7_3	667.433	780.782	877.03
ADAMTS7_4	2149.03	2057.83	1451.42
ADAMTS8_1	1072.99	878.515	643.458
ADAMTS8_2	364.796	161.803	375.351
ADAMTS8_3	1004.72	1210.81	1239.66
ADAMTS8_4	449.371	450.66	427.154
ADAMTS9_1	1304.3	1067.47	1263.29
ADAMTS9_2	487.073	540.792	426.246
ADAMTS9_3	801.939	1063.12	945.193
ADAMTS9_4	342.378	493.011	458.055
ADAMTSL1_1	637.883	833.992	1176.04
ADAMTSL1_2	2296.79	2264.16	2193.03
ADAMTSL1_3	718.382	1075.07	907.022
ADAMTSL1_4	1589.61	1354.15	1418.7
ADAMTSL2_1	786.654	1144.57	974.276
ADAMTSL2_2	396.384	509.3	347.177
ADAMTSL2_3	1615.09	1732.05	1798.59
ADAMTSL2_4	964.976	857.883	1380.53
ADAMTSL3_1	748.952	360.528	678.903
ADAMTSL3_2	1029.17	733.001	1427.79
ADAMTSL3_3	1568.21	864.398	1555.02
ADAMTSL3_4	1751.63	1945.98	1664.99
ADAMTSL4_1	245.575	283.427	238.116
ADAMTSL4_2	167.113	106.421	132.691
ADAMTSL4_3	1133.11	970.819	1281.46
ADAMTSL4_4	159.98	127.054	146.323
ADAMTSL5_1	2080.76	1421.48	2210.3
ADAMTSL5_2	1363.4	925.21	1336.9
ADAMTSL5_3	1174.89	1327	827.044
ADAMTSL5_4	549.231	738.431	457.146
ADAP1_1	797.863	832.906	878.847
ADAP1_2	676.604	495.183	1106.06
ADAP1_3	211.948	267.138	230.845
ADAP1_4	934.406	967.561	777.966
ADAP2_1	1346.08	1064.21	1190.58
ADAP2_2	1172.85	1155.43	1083.34
ADAP2_3	1252.33	948.015	1312.36
ADAP2_4	278.182	506.042	228.119
ADAR_1	965.995	1052.26	835.223
ADAR_2	332.188	392.02	555.301
ADAR_3	1191.19	999.053	779.784
ADAR_4	603.237	747.118	653.455
ADARB1_1	1159.6	992.538	1141.5
ADARB1_2	1390.91	1803.73	1720.43
ADARB1_3	475.865	617.893	556.21
ADARB1_4	470.77	746.032	350.812
ADARB2_1	846.774	990.366	842.494
ADARB2_2	669.471	495.183	619.828
ADARB2_3	717.363	838.336	758.881
ADARB2_4	345.435	287.771	329
ADAT1_1	731.629	1073.98	955.19
ADAT1_2	1026.11	1236.87	1240.57
ADAT1_3	1944.22	1771.15	2305.73
ADAT1_4	5151.97	3085.12	4217.92
ADAT2_1	1053.63	1407.36	1013.36
ADAT2_2	2480.2	2909.2	2174.85
ADAT2_3	210.929	310.575	335.362
ADAT2_4	1005.74	944.757	814.32
ADAT3_1	2385.44	2058.92	2092.15
ADAT3_2	750.99	624.408	917.928
ADAT3_3	1480.58	1474.69	1698.62
ADAT3_4	325.055	312.747	299.008
ADCK1_1	1578.4	1692.96	1115.15
ADCK1_2	5785.78	5665.28	5511.2
ADCK1_3	15.2847	29.32	9.99723
ADCK1_4	2337.54	2208.78	2157.58
ADCK2_1	817.223	615.721	847.038
ADCK2_2	1396.01	1710.34	1525.03
ADCK2_3	922.179	1008.83	832.497
ADCK2_4	452.428	489.753	476.232
ADCK3_1	1429.63	951.272	853.4
ADCK3_2	666.414	640.697	458.055
ADCK3_3	553.307	344.239	518.947
ADCK3_4	661.319	643.955	400.798
ADCK4_1	1204.44	1662.55	2011.26
ADCK4_2	1370.53	1947.07	1773.15
ADCK4_3	1085.22	879.601	684.356
ADCK4_4	352.568	537.534	568.024
ADCK5_1	681.699	811.188	857.944
ADCK5_2	2922.44	2261.99	2522.03
ADCK5_3	1982.94	1719.02	1575.93
ADCK5_4	1796.47	1583.28	1968.55
ADCY1_1	811.11	628.752	844.312
ADCY1_2	2316.15	1931.86	1819.5
ADCY1_3	319.96	425.684	416.248
ADCY1_4	1484.66	1179.32	1036.99
ADCY10_1	1316.52	1201.04	1326
ADCY10_2	535.984	388.762	463.508
ADCY10_3	655.205	817.703	506.223
ADCY10_4	1665.02	1255.33	1775.87
ADCY2_1	1481.6	1219.5	1317.82
ADCY2_2	3966.9	2788.66	4927.73
ADCY2_3	1457.14	1555.05	1412.34
ADCY2_4	828.432	1055.52	858.853
ADCY3_1	1041.4	1791.78	1231.48
ADCY3_2	938.482	702.595	686.174
ADCY3_3	406.574	411.566	386.257
ADCY3_4	135.525	253.021	154.503
ADCY4_1	462.618	263.88	485.32
ADCY4_2	2477.14	1614.77	2183.03
ADCY4_3	844.736	1034.89	816.138
ADCY4_4	362.758	432.199	455.328
ADCY5_1	1354.23	1332.43	1794.05
ADCY5_2	994.526	919.781	1169.68
ADCY5_3	354.606	430.027	494.409
ADCY5_4	1940.14	1108.73	1616.82
ADCY6_1	645.016	620.065	500.77
ADCY6_2	598.142	632.01	446.24
ADCY6_3	81.5185	109.679	83.6132
ADCY6_4	1133.11	868.742	1081.52
ADCY7_1	385.175	459.347	271.743
ADCY7_2	1604.9	2043.72	1857.67
ADCY7_3	1618.14	1525.73	1898.57
ADCY7_4	529.871	401.793	459.873
ADCY8_1	7.13287	3.25778	12.7237
ADCY8_2	3157.82	2121.9	1806.77
ADCY8_3	626.674	650.471	638.005
ADCY8_4	1521.34	1505.1	1463.23
ADCY9_1	423.896	372.473	368.989
ADCY9_2	1298.18	1809.16	1276.92
ADCY9_3	810.091	1031.63	1110.6
ADCY9_4	694.946	544.05	564.389
ADCYAP1_1	696.984	923.038	1062.43
ADCYAP1_2	289.391	555.995	585.292
ADCYAP1_3	4503.9	4582.61	4814.12
ADCYAP1_4	400.46	466.949	352.63
ADCYAP1R1_1	2105.22	1602.83	2588.37
ADCYAP1R1_2	2141.9	2292.39	1560.48
ADCYAP1R1_3	376.004	520.159	487.138
ADCYAP1R1_4	1917.72	2607.31	1808.59
ADD1_1	740.8	363.786	546.212
ADD1_2	1347.09	1201.04	1218.75
ADD1_3	634.826	791.641	736.16
ADD1_4	767.293	919.781	824.317
ADD2_1	796.844	931.726	1424.15
ADD2_2	938.482	1267.28	951.555
ADD2_3	996.564	692.822	1096.97
ADD2_4	171.189	178.092	139.052
ADD3_1	273.087	323.606	331.726
ADD3_2	399.441	577.713	662.544
ADD3_3	1394.99	1459.49	1425.97
ADD3_4	496.244	418.082	730.707
ADGB_1	163.037	197.639	343.541
ADGB_2	2529.11	1588.71	1836.76
ADGB_3	381.099	401.793	279.014
ADGB_4	3018.22	1721.19	1909.47
ADGRA1_1	486.054	660.244	351.721
ADGRA1_2	2073.63	2509.58	2283
ADGRA1_3	1681.32	1421.48	1863.12
ADGRA1_4	1393.97	1332.43	1358.71
ADGRA2_1	1440.84	693.908	701.624
ADGRA2_2	302.638	276.911	211.76
ADGRA2_3	1703.74	1814.58	1899.47
ADGRA2_4	2602.48	1507.27	1515.03
ADGRA3_1	711.249	824.219	767.06
ADGRA3_2	2368.11	2091.5	2494.76
ADGRA3_3	958.862	936.069	907.022
ADGRA3_4	739.781	833.992	788.872
ADGRB1_1	1294.11	1937.29	1649.54
ADGRB1_2	716.344	687.392	669.814
ADGRB1_3	439.181	539.706	302.643
ADGRB1_4	820.28	588.573	795.234
ADGRB2_1	1323.66	1335.69	1694.99
ADGRB2_2	1489.75	1502.92	1221.48
ADGRB2_3	621.579	696.079	748.883
ADGRB2_4	1789.33	1136.97	1006.99
ADGRB3_1	1215.65	920.866	1353.26
ADGRB3_2	315.884	314.919	407.16
ADGRB3_3	2036.94	1840.65	2223.02
ADGRB3_4	1750.61	1803.73	2296.64
ADGRD1_1	104.955	107.507	127.237
ADGRD1_2	1913.65	2151.22	2351.17
ADGRD1_3	902.818	1152.17	957.917
ADGRD1_4	179.341	44.523	78.1602
ADGRE1_1	1295.13	1449.71	1196.03
ADGRE1_2	451.409	488.667	620.737
ADGRE1_3	1438.8	2340.17	2889.2
ADGRE1_4	3434.99	2740.88	2746.51
ADGRE2_1	876.324	832.906	732.524
ADGRE2_2	823.337	512.558	574.386
ADGRE2_3	1211.57	1355.24	1121.51
ADGRE2_4	46.8732	16.2889	41.8066
ADGRE3_1	1325.7	1543.1	622.555
ADGRE3_2	893.647	600.518	738.886
ADGRE3_3	963.957	1447.54	1208.76
ADGRE3_4	474.846	562.51	719.801
ADGRE5_1	654.186	395.278	560.754
ADGRE5_2	809.072	182.436	1098.79
ADGRE5_3	1055.67	768.837	875.212
ADGRE5_4	546.174	525.589	338.997
ADGRF1_1	621.579	668.931	647.094
ADGRF1_2	1086.23	1100.04	889.754
ADGRF1_3	1197.3	804.672	721.618
ADGRF1_4	177.303	270.396	155.412
ADGRF2_1	156.923	234.56	206.306
ADGRF2_2	703.097	827.477	628.008
ADGRF2_3	627.693	801.414	982.455
ADGRF2_4	762.198	716.712	814.32
ADGRF3_1	1529.49	1330.26	1766.78
ADGRF3_2	761.179	672.189	559.845
ADGRF3_3	1865.76	1602.83	1459.6
ADGRF3_4	1566.18	1719.02	1420.52
ADGRF4_1	561.459	564.682	661.635
ADGRF4_2	173.227	268.224	225.392
ADGRF4_3	1061.78	1297.68	1030.62
ADGRF4_4	505.415	831.82	531.671
ADGRF5_1	1108.65	620.065	898.842
ADGRF5_2	2714.57	1487.72	1921.29
ADGRF5_3	225.195	317.091	251.748
ADGRF5_4	306.714	357.27	371.715
ADGRG1_1	339.321	533.19	364.445
ADGRG1_2	8407.62	6037.76	6168.29
ADGRG1_3	567.573	419.168	556.21
ADGRG1_4	1129.03	495.183	505.315
ADGRG2_1	1676.23	1710.34	1623.19
ADGRG2_2	838.622	596.174	542.577
ADGRG2_3	794.806	1005.57	831.588
ADGRG2_4	913.008	856.797	833.406
ADGRG3_1	752.009	910.007	749.792
ADGRG3_2	2379.32	2180.54	1692.26
ADGRG3_3	349.511	345.325	346.268
ADGRG3_4	395.365	469.121	377.168
ADGRG4_1	605.275	825.305	705.259
ADGRG4_2	2619.8	2734.37	2627.45
ADGRG4_3	845.755	840.508	784.328
ADGRG4_4	711.249	482.152	627.099
ADGRG5_1	1607.95	1864.54	2115.78
ADGRG5_2	959.881	981.678	1369.62
ADGRG5_3	1111.71	972.991	1092.42
ADGRG5_4	661.319	920.866	807.958
ADGRG6_1	1883.08	3265.38	2577.47
ADGRG6_2	984.336	929.554	1156.95
ADGRG6_3	587.953	717.798	738.886
ADGRG6_4	10.1898	19.5467	7.27071
ADGRG7_1	743.857	815.532	958.825
ADGRG7_2	1246.21	1333.52	991.544
ADGRG7_3	1624.26	1410.62	1423.24
ADGRG7_4	460.58	538.62	575.295
ADGRL1_1	1775.07	1373.7	1915.83
ADGRL1_2	612.408	945.843	715.256
ADGRL1_3	1955.43	1713.59	1636.82
ADGRL1_4	1593.69	1214.07	1851.31
ADGRL2_1	665.395	1173.89	874.303
ADGRL2_2	703.097	885.031	1027.9
ADGRL2_3	1697.62	1897.12	1562.29
ADGRL2_4	43.8162	62.9838	54.5304
ADGRL3_1	1902.44	1701.65	1708.62
ADGRL3_2	604.256	705.853	588.928
ADGRL3_3	735.705	786.211	774.331
ADGRL3_4	606.294	837.25	750.701
ADGRL4_1	1248.25	942.585	813.411
ADGRL4_2	610.37	441.972	332.635
ADGRL4_3	739.781	1044.66	1735.88
ADGRL4_4	607.313	722.142	781.602
ADGRV1_1	1104.58	740.603	988.817
ADGRV1_2	976.185	1011	1105.15
ADGRV1_3	420.84	588.573	525.309
ADGRV1_4	229.271	110.765	194.492
ADH1A_1	793.787	716.712	657.091
ADH1A_2	578.782	577.713	612.558
ADH1A_3	2055.29	2747.4	2728.34
ADH1A_4	3671.39	2694.19	3062.79
ADH1B_1	1772.01	1638.66	1464.14
ADH1B_2	1015.92	927.382	971.549
ADH1B_3	1898.36	1822.19	1575.93
ADH1B_4	1514.21	1692.96	1574.11
ADH1C_1	1360.34	1224.93	1291.46
ADH1C_2	2878.62	2733.28	2857.39
ADH1C_3	420.84	430.027	303.552
ADH1C_4	1807.67	1191.26	1743.15
ADH4_1	160.999	173.748	231.754
ADH4_2	1470.39	1191.26	1350.54
ADH4_3	409.631	569.026	683.447
ADH4_4	157.942	119.452	166.318
ADH5_1	492.168	579.885	548.939
ADH5_2	677.623	700.423	563.48
ADH5_3	863.078	830.734	804.323
ADH5_4	853.907	420.254	911.566
ADH6_1	3514.47	1991.59	2238.47
ADH6_2	169.151	199.811	268.108
ADH6_3	364.796	331.208	267.199
ADH6_4	1606.93	1910.15	1770.42
ADH7_1	435.105	371.387	488.047
ADH7_2	1233.99	692.822	762.516
ADH7_3	808.053	920.866	953.372
ADH7_4	650.11	608.119	533.489
ADHFE1_1	834.546	908.921	839.767
ADHFE1_2	1444.92	1558.31	1163.31
ADHFE1_3	939.501	658.072	1107.87
ADHFE1_4	498.282	563.596	400.798
ADI1_1	2248.89	2557.36	2464.77
ADI1_2	655.205	974.077	584.384
ADI1_3	594.066	597.26	683.447
ADI1_4	600.18	762.321	635.279
ADIG_1	379.061	425.684	255.384
ADIG_2	1540.7	1898.2	1858.58
ADIG_3	249.651	327.95	268.108
ADIG_4	106.993	89.046	79.9778
ADIPOQ_1	399.441	407.223	556.21
ADIPOQ_2	865.116	731.915	768.878
ADIPOQ_3	2407.85	1945.98	2017.62
ADIPOQ_4	1336.9	889.375	1417.79
ADIPOR1_1	670.49	661.33	628.008
ADIPOR1_2	2091.97	1660.38	1753.15
ADIPOR1_3	467.713	444.144	545.304
ADIPOR1_4	332.188	145.514	262.655
ADIPOR2_1	1250.29	1043.58	1525.03
ADIPOR2_2	932.368	1043.58	736.16
ADIPOR2_3	368.871	378.989	428.063
ADIPOR2_4	1783.22	1629.98	1804.95
ADIRF_1	672.528	638.525	403.525
ADIRF_2	1092.35	772.094	1073.34
ADIRF_3	3769.21	2507.41	2739.24
ADIRF_4	586.934	553.823	500.77
ADK_1	962.938	887.203	724.345
ADK_2	1309.39	1241.22	1346.9
ADK_3	1501.98	1156.51	1509.58
ADK_4	396.384	364.872	407.16
ADM_1	2509.75	1864.54	2578.38
ADM_2	755.066	627.666	730.707
ADM_3	619.541	455.004	596.199
ADM_4	486.054	532.104	374.442
ADM2_1	2440.46	2245.7	2586.56
ADM2_2	551.269	613.549	487.138
ADM2_3	1219.72	894.804	1258.74
ADM2_4	1138.2	839.422	1605.92
ADM5_1	293.467	282.341	609.831
ADM5_2	1372.57	1157.6	1083.34
ADM5_3	579.801	580.971	652.547
ADM5_4	94.7653	91.2179	90.8839
ADNP_1	600.18	721.056	707.077
ADNP_2	520.7	596.174	414.431
ADNP_3	627.693	721.056	669.814
ADNP_4	1773.03	1151.08	1975.82
ADNP2_1	1330.79	1677.76	1094.24
ADNP2_2	1847.41	1833.05	2132.14
ADNP2_3	1226.85	1246.64	1302.37
ADNP2_4	492.168	519.073	375.351
ADO_1	1236.03	1951.41	1415.97
ADO_2	1785.26	2769.11	1888.57
ADO_3	664.376	756.891	982.455
ADO_4	3232.21	3138.33	2168.49
ADORA1_1	544.136	422.426	505.315
ADORA1_2	320.979	390.934	338.997
ADORA1_3	316.903	322.52	241.751
ADORA1_4	1017.96	1250.99	797.052
ADORA2A_1	1708.83	1180.4	1497.77
ADORA2A_2	1423.52	1854.76	1426.88
ADORA2A_3	1225.84	902.406	1357.81
ADORA2A_4	1220.74	800.329	1146.05
ADORA2B_1	1446.95	1715.77	1547.75
ADORA2B_2	1000.64	785.126	1061.52
ADORA2B_3	615.465	578.799	725.254
ADORA2B_4	3405.44	2877.71	3103.69
ADORA3_1	971.09	913.265	1277.83
ADORA3_2	1352.19	851.367	1309.64
ADORA3_3	1309.39	1651.7	1988.54
ADORA3_4	1100.5	1211.9	1401.43
ADPGK_1	2625.92	1562.65	2113.05
ADPGK_2	1074.01	1319.4	1166.04
ADPGK_3	1808.69	2065.43	2371.16
ADPGK_4	1566.18	1432.34	1442.33
ADPRH_1	746.914	901.32	1019.72
ADPRH_2	508.472	527.761	508.041
ADPRH_3	894.666	1123.93	996.997
ADPRH_4	680.68	727.571	929.742
ADPRHL1_1	2602.48	2487.86	2390.25
ADPRHL1_2	868.173	894.804	739.795
ADPRHL1_3	994.526	839.422	757.972
ADPRHL1_4	675.585	629.838	1019.72
ADPRHL2_1	616.484	592.916	765.243
ADPRHL2_2	792.768	756.891	931.56
ADPRHL2_3	8333.23	6064.9	7359.78
ADPRHL2_4	1468.35	811.188	983.364
ADPRM_1	596.104	594.002	648.002
ADPRM_2	1147.37	1294.43	1146.96
ADPRM_3	621.579	589.659	722.527
ADPRM_4	520.7	608.119	457.146
ADRA1A_1	942.558	900.234	937.922
ADRA1A_2	1612.03	1775.49	1440.51
ADRA1A_3	428.991	399.621	443.514
ADRA1A_4	861.04	641.783	827.952
ADRA1B_1	2160.24	2747.4	2132.14
ADRA1B_2	56.044	142.256	49.9862
ADRA1B_3	3360.6	2999.33	2640.18
ADRA1B_4	1581.46	1018.6	813.411
ADRA1D_1	323.017	313.833	365.353
ADRA1D_2	1142.28	1341.12	1145.14
ADRA1D_3	1611.01	978.421	765.243
ADRA1D_4	2269.27	2354.29	2075.79
ADRA2A_1	1861.68	1106.56	2093.97
ADRA2A_2	1314.49	1595.23	1429.6
ADRA2A_3	534.965	551.651	660.726
ADRA2A_4	1136.16	957.788	938.831
ADRA2B_1	2127.63	1406.28	1726.79
ADRA2B_2	521.719	562.51	466.235
ADRA2B_3	440.2	652.642	505.315
ADRA2B_4	308.752	298.63	233.572
ADRA2C_1	2934.67	2305.42	2399.34
ADRA2C_2	859.002	1260.76	1296
ADRA2C_3	240.48	287.771	206.306
ADRA2C_4	303.657	251.935	296.282
ADRB1_1	549.231	600.518	628.008
ADRB1_2	1308.37	822.047	1485.95
ADRB1_3	1525.42	1472.52	1277.83
ADRB1_4	526.814	236.732	323.547
ADRB2_1	1229.91	1053.35	1410.52
ADRB2_2	447.333	539.706	546.212
ADRB2_3	17.3227	8.68742	7.27071
ADRB2_4	278.182	388.762	253.566
ADRB3_1	2055.29	1968.79	1140.59
ADRB3_2	1987.01	1820.01	1866.76
ADRB3_3	1738.38	1817.84	1196.94
ADRB3_4	780.54	660.244	780.693
ADRBK1_1	1032.23	969.733	1301.46
ADRBK1_2	3086.5	1889.51	2613.82
ADRBK1_3	955.805	1145.65	1465.96
ADRBK1_4	399.441	504.956	406.251
ADRBK2_1	972.109	923.038	946.102
ADRBK2_2	1409.25	1123.93	1329.63
ADRBK2_3	985.355	1186.92	1043.35
ADRBK2_4	995.545	741.688	982.455
ADRM1_1	425.934	393.106	435.334
ADRM1_2	1038.34	1121.76	1191.49
ADRM1_3	445.295	485.41	565.298
ADRM1_4	104.955	152.03	141.779
ADSL_1	456.504	372.473	489.864
ADSL_2	900.78	794.899	841.585
ADSL_3	309.77	187.865	436.243
ADSL_4	765.255	665.674	1055.16
ADSS_1	43.8162	19.5467	44.5331
ADSS_2	561.459	698.251	915.201
ADSS_3	423.896	385.504	348.085
ADSS_4	1308.37	562.51	740.704
ADSSL1_1	720.42	696.079	776.149
ADSSL1_2	1196.28	1114.16	926.107
ADSSL1_3	1014.91	1123.93	1037.89
ADSSL1_4	393.327	706.939	632.552
ADTRP_1	846.774	471.293	718.892
ADTRP_2	287.353	367.043	431.699
ADTRP_3	679.661	660.244	747.975
ADTRP_4	1722.08	1492.06	1573.2
AEBP1_1	754.047	864.398	723.436
AEBP1_2	1756.72	1535.5	1376.89
AEBP1_3	1069.93	1299.86	1201.49
AEBP1_4	656.224	503.87	627.099
AEBP2_1	3557.27	2180.54	2647.45
AEBP2_2	464.656	476.722	384.439
AEBP2_3	502.358	567.94	549.848
AEBP2_4	929.311	746.032	989.726
AEN_1	747.933	773.18	763.425
AEN_2	767.293	848.109	799.778
AEN_3	5823.48	4932.28	4553.28
AEN_4	425.934	471.293	521.674
AES_1	694.946	611.377	703.442
AES_2	945.615	886.117	996.088
AES_3	593.047	792.727	710.712
AES_4	795.825	688.478	623.464
AFAP1_1	918.103	502.784	406.251
AFAP1_2	2035.93	1384.56	2283
AFAP1_3	204.815	220.443	184.494
AFAP1_4	371.928	450.66	469.87
AFAP1L1_1	345.435	455.004	489.864
AFAP1L1_2	323.017	431.113	280.831
AFAP1L1_3	1158.58	570.112	586.201
AFAP1L1_4	34.6454	29.32	20.9033
AFAP1L2_1	917.084	774.266	844.312
AFAP1L2_2	961.919	1009.91	996.088
AFAP1L2_3	692.908	676.533	744.339
AFAP1L2_4	1064.84	954.53	1411.43
AFF1_1	828.432	798.157	879.756
AFF1_2	1092.35	1736.4	1534.12
AFF1_3	2363.02	1148.91	1377.8
AFF1_4	328.112	174.834	458.055
AFF2_1	874.286	729.743	982.455
AFF2_2	478.921	658.072	663.453
AFF2_3	284.296	344.239	303.552
AFF2_4	882.438	762.321	753.428
AFF3_1	2067.51	1262.93	1829.49
AFF3_2	1548.85	1002.31	700.715
AFF3_3	939.501	698.251	1037.89
AFF3_4	223.157	157.459	144.505
AFF4_1	1260.48	1424.74	1265.1
AFF4_2	464.656	544.05	389.892
AFF4_3	767.293	1232.53	837.041
AFF4_4	362.758	403.965	491.682
AFG3L2_1	332.188	313.833	498.953
AFG3L2_2	2372.19	1354.15	1186.94
AFG3L2_3	596.104	471.293	667.088
AFG3L2_4	104.955	131.397	137.235
AFM_1	269.011	194.381	310.823
AFM_2	788.692	876.343	666.179
AFM_3	994.526	969.733	1176.95
AFM_4	511.529	363.786	595.29
AFMID_1	979.242	1098.96	973.367
AFMID_2	2447.59	1577.85	1544.12
AFMID_3	1064.84	844.852	1144.23
AFMID_4	1371.55	1631.06	1653.18
AFP_1	2740.04	2738.71	2794.68
AFP_2	1201.38	911.093	505.315
AFP_3	814.167	869.828	560.754
AFP_4	195.645	297.544	454.42
AFTPH_1	1732.27	1629.98	1423.24
AFTPH_2	716.344	793.813	812.502
AFTPH_3	305.695	316.005	453.511
AFTPH_4	253.726	400.707	253.566
AGA_1	229.271	201.983	156.32
AGA_2	796.844	752.548	667.088
AGA_3	2414.99	2575.82	1882.21
AGA_4	1505.04	2023.08	1843.13
AGAP1_1	1140.24	1239.04	1232.39
AGAP1_2	1483.64	1806.98	1548.66
AGAP1_3	481.978	521.245	631.643
AGAP1_4	1209.53	1096.79	714.348
AGAP11_1	2168.39	1570.25	1729.52
AGAP11_2	1505.04	1449.71	1483.23
AGAP11_3	361.739	297.544	343.541
AGAP11_4	1005.74	792.727	783.419
AGAP2_1	1289.01	1480.12	1614.1
AGAP2_2	385.175	651.556	586.201
AGAP2_3	785.635	887.203	1091.52
AGAP2_4	1169.79	1860.19	1502.31
AGAP3_1	1569.23	1634.32	1716.8
AGAP3_2	402.498	330.122	439.878
AGAP3_3	1565.16	1551.79	1147.86
AGAP3_4	366.833	444.144	376.259
AGAP4_1	951.729	247.591	641.64
AGAP4_2	859.002	501.698	875.212
AGAP4_3	670.49	614.635	448.058
AGAP4_4	1042.42	1118.51	1037.89
AGAP5_1	1514.21	763.407	1020.63
AGAP5_2	339.321	396.364	365.353
AGAP5_3	678.642	520.159	475.323
AGAP5_4	552.288	613.549	643.458
AGAP6_1	1669.09	1978.56	1555.02
AGAP6_2	1197.3	1087.01	765.243
AGAP6_3	1130.05	795.985	1375.98
AGAP6_4	434.086	771.008	373.533
AGAP9_1	1227.87	1274.88	877.939
AGAP9_2	330.15	418.082	314.458
AGAP9_3	312.827	413.738	337.179
AGAP9_4	266.973	103.163	215.395
AGBL1_1	1048.53	996.881	1482.32
AGBL1_2	2366.08	1979.65	1957.64
AGBL1_3	465.675	460.433	470.779
AGBL1_4	493.187	914.351	501.679
AGBL2_1	228.252	263.88	492.591
AGBL2_2	710.23	755.805	529.853
AGBL2_3	635.845	633.096	693.444
AGBL2_4	504.396	704.767	531.671
AGBL3_1	940.52	1292.25	1476.86
AGBL3_2	678.642	647.213	510.768
AGBL3_3	617.503	714.54	669.814
AGBL3_4	211.948	205.24	212.668
AGBL4_1	610.37	613.549	514.403
AGBL4_2	156.923	129.225	131.782
AGBL4_3	269.011	274.74	293.555
AGBL4_4	2440.46	1900.37	2897.38
AGBL5_1	643.997	532.104	482.594
AGBL5_2	2581.08	2285.88	2197.57
AGBL5_3	783.597	793.813	720.709
AGBL5_4	388.232	491.925	480.776
AGER_1	1832.13	1517.04	2215.75
AGER_2	900.78	1090.27	1294.19
AGER_3	950.71	1385.64	956.099
AGER_4	815.185	752.548	877.939
AGFG1_1	377.023	368.129	410.795
AGFG1_2	390.27	437.629	452.602
AGFG1_3	2603.5	2104.53	2301.18
AGFG1_4	847.793	864.398	704.35
AGFG2_1	2800.16	2605.14	1963.09
AGFG2_2	1211.57	1456.23	1595.92
AGFG2_3	735.705	681.962	675.268
AGFG2_4	1471.41	1192.35	1859.48
AGGF1_1	1296.14	418.082	1414.15
AGGF1_2	283.277	512.558	614.375
AGGF1_3	609.351	703.681	750.701
AGGF1_4	148.771	171.577	113.605
AGK_1	726.534	1761.37	787.964
AGK_2	342.378	497.355	377.168
AGK_3	1996.19	1279.22	2196.66
AGK_4	1096.42	1013.17	1158.77
AGL_1	114.126	185.694	142.688
AGL_2	540.06	259.537	427.154
AGL_3	801.939	718.884	849.765
AGL_4	728.572	839.422	642.549
AGMAT_1	1055.67	1296.6	1613.19
AGMAT_2	2564.78	3016.71	2124.87
AGMAT_3	376.004	470.207	503.497
AGMAT_4	2007.39	1551.79	1435.06
AGMO_1	677.623	785.126	889.754
AGMO_2	817.223	809.016	596.199
AGMO_3	373.966	525.589	388.074
AGMO_4	960.9	911.093	952.463
AGO1_1	696.984	949.101	952.463
AGO1_2	614.446	875.258	526.218
AGO1_3	908.932	856.797	1764.97
AGO1_4	1088.27	1165.2	991.544
AGO2_1	680.68	793.813	835.223
AGO2_2	406.574	313.833	539.85
AGO2_3	1942.18	1583.28	1957.64
AGO2_4	588.972	759.063	492.591
AGO3_1	702.079	746.032	538.033
AGO3_2	679.661	887.203	589.837
AGO3_3	259.84	298.63	200.853
AGO3_4	1373.59	879.601	1004.27
AGO4_1	833.527	531.019	763.425
AGO4_2	471.789	622.236	516.221
AGO4_3	622.598	407.223	653.455
AGO4_4	1396.01	1275.96	1401.43
AGPAT1_1	235.385	259.537	225.392
AGPAT1_2	15.2847	40.1793	25.4475
AGPAT1_3	1550.89	1427.99	1475.95
AGPAT1_4	842.698	602.69	920.654
AGPAT2_1	2475.11	2188.14	2361.16
AGPAT2_2	3511.41	4084.17	2122.14
AGPAT2_3	1810.73	2958.07	1964
AGPAT2_4	2954.03	2726.76	3168.21
AGPAT3_1	706.154	1104.39	852.491
AGPAT3_2	1436.76	1610.43	1412.34
AGPAT3_3	871.229	899.148	752.519
AGPAT3_4	5315.01	3059.06	4796.85
AGPAT4_1	548.212	651.556	708.895
AGPAT4_2	800.92	1177.15	987.908
AGPAT4_3	821.299	1069.64	814.32
AGPAT4_4	614.446	818.789	692.535
AGPAT5_1	899.761	768.837	1262.38
AGPAT5_2	1330.79	1309.63	1097.88
AGPAT5_3	1070.95	946.929	975.184
AGPAT5_4	928.292	1005.57	932.469
AGPAT6_1	982.299	1151.08	788.872
AGPAT6_2	811.11	752.548	548.939
AGPAT6_3	534.965	774.266	605.287
AGPAT6_4	995.545	670.017	1266.92
AGPAT9_1	517.643	487.581	737.977
AGPAT9_2	872.248	748.204	1232.39
AGPAT9_3	2925.5	3486.91	3640.81
AGPAT9_4	2988.67	2751.74	1967.64
AGPS_1	614.446	476.722	613.466
AGPS_2	569.611	625.494	730.707
AGPS_3	1154.51	868.742	800.687
AGPS_4	554.326	586.401	1066.07
AGR2_1	469.751	635.268	786.146
AGR2_2	428.991	363.786	413.522
AGR2_3	705.135	710.197	821.591
AGR2_4	315.884	371.387	342.632
AGR3_1	185.455	236.732	353.538
AGR3_2	1633.43	1059.87	1211.48
AGR3_3	1454.09	1519.21	1448.69
AGR3_4	1132.09	1196.69	869.759
AGRN_1	421.858	506.042	518.038
AGRN_2	650.11	827.477	1159.68
AGRN_3	328.112	481.066	309.005
AGRN_4	1757.74	1704.91	1909.47
AGRP_1	1275.77	954.53	886.118
AGRP_2	619.541	747.118	644.367
AGRP_3	989.431	1274.88	918.836
AGRP_4	657.243	450.66	869.759
AGT_1	558.402	478.894	527.127
AGT_2	567.573	396.364	555.301
AGT_3	110.05	108.593	110.878
AGT_4	675.585	632.01	687.082
AGTPBP1_1	308.752	318.177	401.707
AGTPBP1_2	718.382	565.768	459.873
AGTPBP1_3	1024.08	856.797	1046.07
AGTPBP1_4	1283.92	915.437	1053.34
AGTR1_1	598.142	780.782	880.665
AGTR1_2	560.44	336.638	310.823
AGTR1_3	649.091	573.37	703.442
AGTR1_4	827.413	966.475	765.243
AGTR2_1	1111.71	1045.75	656.182
AGTR2_2	426.953	363.786	461.69
AGTR2_3	2241.76	2874.45	1141.5
AGTR2_4	1012.87	680.877	654.364
AGTRAP_1	862.059	1131.54	907.022
AGTRAP_2	1174.89	1393.24	994.27
AGTRAP_3	626.674	890.46	447.149
AGTRAP_4	499.301	447.402	447.149
AGXT_1	514.586	542.964	438.06
AGXT_2	501.339	597.26	648.911
AGXT_3	2981.54	2238.1	1841.31
AGXT_4	657.243	714.54	770.696
AGXT2_1	2440.46	1821.1	2280.28
AGXT2_2	1047.51	1167.37	1030.62
AGXT2_3	1974.79	1778.75	1906.74
AGXT2_4	1729.21	1002.31	1236.93
AHCTF1_1	1669.09	1038.15	1492.31
AHCTF1_2	601.199	537.534	603.469
AHCTF1_3	240.48	262.794	284.467
AHCTF1_4	73.3667	96.6475	65.4364
AHCY_1	337.283	250.849	249.022
AHCY_2	1137.18	1132.62	1136.05
AHCY_3	921.16	756.891	905.204
AHCY_4	673.547	459.347	347.177
AHCYL1_1	149.79	119.452	174.497
AHCYL1_2	468.732	458.261	638.005
AHCYL1_3	342.378	721.056	505.315
AHCYL1_4	350.53	407.223	520.765
AHCYL2_1	1977.84	1741.83	2096.69
AHCYL2_2	983.318	1030.55	847.038
AHCYL2_3	1397.02	1205.38	1759.51
AHCYL2_4	841.679	811.188	896.115
AHDC1_1	722.458	699.337	1007.9
AHDC1_2	477.902	407.223	614.375
AHDC1_3	849.831	863.312	866.124
AHDC1_4	1380.72	810.102	1089.7
AHI1_1	959.881	713.454	638.914
AHI1_2	555.345	664.588	587.11
AHI1_3	892.628	997.967	914.292
AHI1_4	1496.88	1140.22	1777.69
AHNAK_1	1235.01	949.101	1438.69
AHNAK_2	426.953	406.137	379.895
AHNAK_3	1334.87	969.733	987.908
AHNAK_4	865.116	681.962	1190.58
AHNAK2_1	2150.05	2000.28	2048.52
AHNAK2_2	1549.87	1177.15	1768.6
AHNAK2_3	476.884	542.964	488.955
AHNAK2_4	186.474	149.858	153.594
AHR_1	1821.94	1712.51	1405.07
AHR_2	1647.69	2167.51	1635
AHR_3	1313.47	1077.24	1228.75
AHR_4	1309.39	1493.15	1245.11
AHRR_1	185.455	107.507	117.24
AHRR_2	1163.68	1394.33	972.458
AHRR_3	1544.78	1602.83	1545.94
AHRR_4	1738.38	1884.08	1318.73
AHSA1_1	1734.31	2537.81	1742.24
AHSA1_2	526.814	574.456	630.734
AHSA1_3	1682.34	1817.84	1944.92
AHSA1_4	512.548	317.091	331.726
AHSA2_1	570.63	562.51	395.345
AHSA2_2	1446.95	1427.99	1811.32
AHSA2_3	1247.23	1560.48	1373.26
AHSA2_4	953.767	774.266	1095.15
AHSG_1	481.978	402.879	459.873
AHSG_2	764.236	708.025	887.027
AHSG_3	1651.77	1787.44	2113.96
AHSG_4	1361.36	1180.4	1380.53
AHSP_1	233.347	305.146	237.207
AHSP_2	2226.48	1805.9	1861.3
AHSP_3	1615.09	1959.01	1585.02
AHSP_4	422.877	524.503	501.679
AICDA_1	528.852	572.284	591.654
AICDA_2	652.148	769.923	538.033
AICDA_3	1767.93	1097.87	1618.64
AICDA_4	2016.57	2247.87	1832.22
AIDA_1	650.11	647.213	556.21
AIDA_2	1748.57	1636.49	1141.5
AIDA_3	609.351	500.613	428.972
AIDA_4	544.136	309.489	323.547
AIF1_1	612.408	531.019	591.654
AIF1_2	1340.98	924.124	777.966
AIF1_3	901.799	559.253	488.047
AIF1_4	396.384	305.146	361.718
AIF1L_1	511.529	428.941	436.243
AIF1L_2	389.251	461.519	477.141
AIF1L_3	1033.25	596.174	1102.42
AIF1L_4	965.995	772.094	930.651
AIFM1_1	2055.29	1305.28	2017.62
AIFM1_2	1204.44	1673.41	1341.45
AIFM1_3	811.11	1013.17	760.698
AIFM1_4	834.546	905.663	970.64
AIFM2_1	4589.49	3427.19	3591.73
AIFM2_2	1722.08	1778.75	2139.41
AIFM2_3	727.553	632.01	703.442
AIFM2_4	765.255	817.703	581.657
AIFM3_1	396.384	481.066	381.712
AIFM3_2	821.299	1747.26	971.549
AIFM3_3	741.819	800.329	1089.7
AIFM3_4	509.491	435.457	381.712
AIG1_1	638.902	753.634	671.632
AIG1_2	393.327	451.746	518.947
AIG1_3	1129.03	1323.75	1039.71
AIG1_4	271.049	481.066	308.096
AIM1_1	1048.53	610.291	1375.98
AIM1_2	490.13	594.002	433.516
AIM1_3	2205.08	2256.56	2811.95
AIM1_4	694.946	687.392	670.723
AIM1L_1	2051.21	1545.27	1031.53
AIM1L_2	816.204	913.265	778.875
AIM1L_3	852.888	1015.34	900.66
AIM1L_4	771.369	899.148	708.895
AIM2_1	2519.94	2681.15	1781.32
AIM2_2	329.131	361.614	625.281
AIM2_3	901.799	1084.84	918.836
AIM2_4	1229.91	1713.59	1645
AIMP1_1	558.402	760.149	1108.78
AIMP1_2	557.383	618.979	623.464
AIMP1_3	962.938	1181.49	1251.47
AIMP1_4	582.858	926.296	667.088
AIMP2_1	1271.69	1257.5	1059.71
AIMP2_2	202.777	212.842	95.4281
AIMP2_3	1438.8	1236.87	1083.34
AIMP2_4	2790.99	2231.58	2358.44
AIP_1	1000.64	977.335	1141.5
AIP_2	875.305	945.843	1466.87
AIP_3	868.173	760.149	744.339
AIP_4	1336.9	1295.51	1688.62
AIPL1_1	1713.93	1053.35	1429.6
AIPL1_2	495.225	879.601	644.367
AIPL1_3	1090.31	988.194	1083.34
AIPL1_4	548.212	555.995	501.679
AIRE_1	560.44	499.527	577.113
AIRE_2	1043.44	1206.47	1095.15
AIRE_3	1670.11	1829.79	1507.76
AIRE_4	952.748	701.509	1014.26
AJAP1_1	457.523	474.55	739.795
AJAP1_2	1113.75	1141.31	1076.07
AJAP1_3	1546.81	1299.86	1677.72
AJAP1_4	708.192	683.048	747.975
AJUBA_1	1604.9	931.726	1133.32
AJUBA_2	1188.13	1331.35	1306.91
AJUBA_3	899.761	1062.04	996.997
AJUBA_4	1257.42	1861.28	1455.96
AK1_1	685.775	537.534	857.944
AK1_2	656.224	749.29	775.24
AK1_3	1343.02	1207.55	1236.02
AK1_4	1913.65	1289	1286.92
AK2_1	491.149	472.378	528.036
AK2_2	599.161	576.627	615.284
AK2_3	191.569	186.78	226.301
AK2_4	424.915	623.322	543.486
AK3_1	1494.85	1548.53	2584.74
AK3_2	2627.95	3236.06	2549.29
AK3_3	305.695	363.786	332.635
AK3_4	993.507	1012.08	1097.88
AK4_1	434.086	495.183	471.688
AK4_2	2578.02	1088.1	1833.13
AK4_3	523.757	425.684	407.16
AK4_4	752.009	862.226	818.864
AK5_1	1379.7	833.992	775.24
AK5_2	533.946	387.676	412.613
AK5_3	1555.99	1430.17	1411.43
AK5_4	1347.09	1811.33	1331.45
AK6_1	2676.87	965.389	1740.43
AK6_2	631.769	699.337	473.505
AK6_3	318.941	236.732	371.715
AK6_4	59.1009	79.2727	114.514
AK7_1	516.624	385.504	443.514
AK7_2	1457.14	1672.33	1256.02
AK7_3	404.536	336.638	526.218
AK7_4	1189.15	1067.47	1191.49
AK8_1	1594.71	1864.54	2064.88
AK8_2	544.136	613.549	604.378
AK8_3	898.742	987.108	870.668
AK8_4	270.03	392.02	290.829
AK9_1	603.237	678.705	565.298
AK9_2	1325.7	1271.62	981.546
AK9_3	1404.16	1470.35	1841.31
AK9_4	361.739	390.934	317.185
AKAP1_1	427.972	368.129	319.003
AKAP1_2	462.618	414.824	512.585
AKAP1_3	1343.02	1573.51	1128.78
AKAP1_4	1596.74	1662.55	1415.97
AKAP10_1	953.767	914.351	1019.72
AKAP10_2	917.084	774.266	917.019
AKAP10_3	8066.26	3944.09	6201.01
AKAP10_4	288.372	300.802	259.019
AKAP11_1	2368.11	1496.41	2177.58
AKAP11_2	615.465	716.712	757.063
AKAP11_3	359.701	541.878	596.199
AKAP11_4	1051.59	855.711	956.099
AKAP12_1	641.959	653.728	949.737
AKAP12_2	440.2	473.464	547.121
AKAP12_3	1188.13	924.124	1197.85
AKAP12_4	2483.26	1906.89	1984
AKAP13_1	790.73	809.016	1425.97
AKAP13_2	1029.17	633.096	847.038
AKAP13_3	2921.42	1903.63	2047.61
AKAP13_4	520.7	640.697	789.781
AKAP14_1	409.631	567.94	697.08
AKAP14_2	592.028	743.86	774.331
AKAP14_3	623.617	697.165	530.762
AKAP14_4	381.099	455.004	398.98
AKAP17A_1	1840.28	1767.89	1774.05
AKAP17A_2	655.205	941.499	793.417
AKAP17A_3	3126.24	2495.46	2305.73
AKAP17A_4	363.777	476.722	436.243
AKAP2_1	1089.29	692.822	660.726
AKAP2_2	1184.06	748.204	688.9
AKAP2_3	352.568	132.483	219.03
[truncated: 75,442 more rows]

## Sheet: C. MDA-MB-231 WT and NEDD8 KO
sgRNA	WT_day 4	NEDD8 KO_day 4	WT_day 21	NEDD8 KO_day 21
A1BG_1	1428.570121897302	1702.0305793360612	1558.8444225009964	2180.9613438570514
A1BG_2	550.5452961464686	559.8538429279233	690.2709081576319	563.4603372159364
A1BG_3	914.0950348087055	1123.4525276145619	660.0324544770106	705.9570634230555
A1BG_4	458.47134144611084	394.1445951047755	671.50221276966	1155.2024674195454
A1CF_1	1955.385017347802	1706.7116315344554	1158.4455875575968	1401.0365141585446
A1CF_2	635.974738651955	774.2460336143689	385.800960752755	529.7397378844807
A1CF_3	1047.9344947339678	1149.6664199255683	1794.4958201499767	1408.650843039841
A1CF_4	1141.906881490003	1158.0923138826774	892.5557362279953	1104.0776877879835
A2M_1	1428.570121897302	1343.4619809390801	1280.442107579414	801.6800550736393
A2M_2	1273.8479093595874	1498.8729139257614	1621.4067404609027	1584.8681685784159
A2M_3	1206.4535713830371	1345.3344018184378	1299.2108029673857	1695.8198179915926
A2M_4	1223.5394598841344	907.1879160487588	1253.3317697967877	1449.9857712525932
A2ML1_1	1055.5282229566776	1120.6438962955256	1371.157468621278	1071.4448497252845
A2ML1_2	1453.2497386211091	1738.5427864835344	1528.6059688203752	2172.259253706998
A2ML1_3	811.5797038021217	942.7639127565532	1089.6270378017	807.1188614174224
A2ML1_4	1142.8560975178416	1200.2217836682237	645.4345802863658	602.6197428911753
A3GALT2_1	1140.0084494343253	965.2329633088444	1119.8654914823212	1780.6651969546099
A3GALT2_2	954.9113240057712	956.8070693517352	745.5342890222157	969.195290462161
A3GALT2_3	1110.5827525713244	1196.4769419095085	2479.5532018109498	2609.539283747165
A3GALT2_4	949.2160278387388	984.8933825420993	2236.6028670666474	1242.2233689200762
A4GALT_1	1436.1638501200118	1375.2931358881594	1470.214472057796	1517.4269699155045
A4GALT_2	933.0793553654803	1079.4506369496582	1349.2606573353107	2227.7350784135865
A4GALT_3	1032.7470382885479	1071.9609534322278	1543.20384301102	1259.6275492201821
A4GALT_4	217.3704703750712	220.00945332451838	223.13893405699883	400.2961469024413
A4GNT_1	850.4975609435099	794.8426632873026	686.1000869603048	1131.2717195068994
A4GNT_2	1831.986933728766	2038.130127180751	2394.0513672657444	1914.459833011676
A4GNT_3	1551.0189894884993	1629.0061650411149	2024.9336913022978	1763.2610166545037
A4GNT_4	200.28458187397388	242.4785038768096	241.9076294449707	304.57315525185754
AAAS_1	1163.7388501302937	1148.7302094858896	855.0183454520516	868.033492467794
AAAS_2	667.2988675706334	885.6550759361463	609.9826001090856	492.75585474675523
AAAS_3	1581.393902379339	1652.4114260330848	1122.9936073803165	927.8603622494088
AAAS_4	1387.7538327002362	1384.6552402849475	865.4453984453693	1335.7708380331467
AACS_1	1528.2378048203695	1629.9423754807935	1044.7907099304339	1126.9206744318728
AACS_2	1888.9398953990903	1801.2688859420143	2491.022960103599	1823.0878864361187
AACS_3	1256.7620208584901	1989.4471843174533	1581.7839390862955	1977.5499865995607
AACS_4	1498.8121079573687	1398.6983968801296	1046.8761205290973	1631.641903134951
AADAC_1	1340.2930313082993	1149.6664199255683	1499.4102204390856	1720.8383271729952
AADAC_2	940.6730835881901	763.0115083382233	1019.7657827464714	1480.443086777779
AADAC_3	802.0875435237343	741.4786682256108	747.6196996208793	997.4770834498335
AADAC_4	753.6775261039586	699.3491984400648	1136.5487762716295	698.342734541759
AADACL2_1	857.1420731383812	601.9833127134694	1717.3356279994257	1587.043691115929
AADACL2_2	1188.418466854101	1207.711467185654	2322.1047016118523	1981.901031674587
AADACL2_3	810.630487774283	593.5574187563602	767.4311003081829	815.8209515674755
AADACL2_4	1183.6723867149074	858.504973185461	2307.5068274212076	1257.452026682669
AADACL3_1	1176.0786584921973	1086.0041100274098	1175.1288723469052	1316.1911351955273
AADACL3_2	1016.6103658152892	856.6325523061034	1013.5095509504807	750.5552754420775
AADACL3_3	1239.6761323573928	1373.4207150088018	1231.4349585108207	1193.2741118260276
AADACL3_4	1000.4736933420307	1083.1954787083735	678.8011498649824	726.6245275294316
AADACL4_1	485.0493902255955	618.8351006276879	281.530430819578	395.9451018274148
AADACL4_2	1012.8135017039343	1381.8466089659112	930.0931270039391	1590.306974922199
AADACL4_3	1457.0466027324642	1531.6402793145194	1825.7769791299297	1418.4406944586508
AADACL4_4	29.425696863000905	39.32083846650966	65.69043385790152	29.36955425642912
AADAT_1	1008.0674215647406	931.5293874804075	1405.5667434992263	1044.2508180063687
AADAT_2	2074.0370208276445	1695.4771062583097	1522.3497370243845	1879.6514724114636
AADAT_3	1289.0353658050074	1232.052938617303	1901.8944659811489	1294.4359098203945
AADAT_4	911.2473867251892	905.3154951694012	532.8224079585347	742.9409465607811
AAED1_1	1082.1062717361622	1087.8765309067674	685.0573816609731	897.403046724223
AAED1_2	1378.2616724218487	1637.432058998224	1373.2428792199414	1537.006672753124
AAED1_3	1590.8860626577264	1452.0623919418213	1346.1325414373155	1360.7893472145493
AAED1_4	411.01054005417393	299.5873406972165	357.6479176707972	671.1487028228432
AAGAB_1	2117.700958108226	2424.785038768096	2394.0513672657444	2049.3422303374987
AAGAB_2	1459.8942508159803	1229.2443072982664	2307.5068274212076	1223.7314273512134
AAGAB_3	1214.047299605747	1249.8409369712	881.0859779353459	848.4537896301746
AAGAB_4	1693.40139366431	1802.205096381693	1478.5561144524502	2363.7052370081656
AAK1_1	1582.3431184071776	1399.6346073198083	959.2888753852286	1383.6323338584384
AAK1_2	952.063675922255	776.1184544937265	933.2212429019344	844.102744555148
AAK1_3	1470.3356271222065	1241.415043014091	1609.9369821682533	1216.1170984699168
AAK1_4	1358.3281358372353	1379.9741880865536	672.5449180689918	1088.8490300253907
AAMDC_1	1199.809059188166	1099.111056182913	885.256799132673	983.3361869559972
AAMDC_2	1327.0040069185568	994.2554869388873	665.2459809736695	1007.2669348686431
AAMDC_3	1324.1563588350407	1053.2367446386518	2058.3002608809143	980.0729031497273
AAMDC_4	1367.8202961156226	1478.2762842528277	1466.043650860469	931.1236460556787
AAMP_1	1070.7156794020973	1095.3662144241978	795.5841433901408	537.3540667657772
AAMP_2	654.9590592087297	971.786436386596	564.1035669384877	648.3057161789538
AAMP_3	1295.6798779998785	1520.4057540383737	599.5555471157679	275.2036009954284
AAMP_4	988.1338849801272	924.0397039629771	141.80792070912076	336.1182320457999
AANAT_1	1122.922560933228	1037.3211671641122	1169.9153458502462	536.2663054970205
AANAT_2	1267.2033971647163	1541.938594150986	1285.6556340760728	1163.9045575695984
AANAT_3	970.098780451191	1229.2443072982664	975.972160174537	1020.3200700937227
AANAT_4	1047.9344947339678	855.6963418664246	1214.7516737215124	1294.4359098203945
AAR2_1	832.4624564145739	863.186025383855	884.2140938333412	477.52719698416234
AAR2_2	859.9897212218974	824.8013973570241	1186.5986306395546	697.2549732730024
AAR2_3	625.5333623457288	383.84628026830865	1140.7195974689566	716.8346761106218
AAR2_4	1060.2743030958713	984.8933825420993	752.8332261175382	1072.532610994041
AARD_1	1810.154965088475	1959.4884502477316	1677.7128266248183	1123.657390625603
AARD_2	1681.0615853024065	1302.268721593213	1058.3458788217467	757.0818430546173
AARD_3	655.9082752365686	790.1616110889086	311.7688845001993	724.4490049919183
AARD_4	1020.4072299266443	898.7620220916496	1078.1572795090503	634.1648196851177
AARS_1	1040.3407665112577	1087.8765309067674	260.67632483294256	215.37673121381354
AARS_2	1106.7858884599696	828.5462391157394	907.1536104186401	176.21732553857473
AARS_3	1345.0391114474928	1320.0567199471102	406.6550667393904	436.1922687714102
AARS_4	689.1308362109244	544.8744758930625	208.54105986635406	169.6907579260349
AARS2_1	1982.9122821551255	2010.043813990387	1535.9049059156976	1703.434146872889
AARS2_2	1404.8397212013335	1384.6552402849475	721.552067137585	1099.726642712957
AARS2_3	571.4280487589208	989.5744347404933	541.1640503531887	436.1922687714102
AARS2_4	951.1144598944163	933.4018083597651	313.85429509886285	289.34449748926465
AARSD1_1	2006.642682851094	2029.7042332236417	2061.4283767789098	1056.2161919626917
AARSD1_2	691.9784842944406	728.3717220701076	999.9543820591676	686.3773605854361
AARSD1_3	830.5640243588965	730.2441429494652	744.491583722884	736.4143789482413
AARSD1_4	1100.1413762650982	1383.7190298452688	2030.1472177989567	2030.8502887686357
AASDH_1	947.3175957830614	744.2872995446472	1258.5452962934467	794.0657261923428
AASDH_2	1336.4961671969443	1049.4919028799366	875.872451438687	926.7726009806522
AASDH_3	1270.0510452482326	1734.7979447248192	2296.037069128558	1832.8777378549285
AASDH_4	982.4385888130947	962.424331989808	1295.0399817700586	1270.5051619077485
AASDHPPT_1	1570.003310045274	1105.6645292606647	690.2709081576319	639.6036260289009
AASDHPPT_2	680.5878919603757	687.1784627242404	133.4662783144666	320.889574283207
AASDHPPT_3	929.2824912541253	1274.182408402849	670.4595074703283	515.5988413906446
AASDHPPT_4	1202.656707271682	1303.2049320328917	540.121345053857	350.25912853963615
AASS_1	972.9464285347073	778.9270858127629	1085.456216604373	1185.6597829447312
AASS_2	1556.7142856555317	1693.6046853789521	2132.33233713347	1994.954166899667
AASS_3	1233.0316201625217	1219.8822029014784	1851.844611613224	2251.6658263262325
AASS_4	1228.285540023328	1474.5314424941125	1353.4314785326378	1571.8150333533363
AATF_1	1886.092247315574	1275.1186188425277	998.9116767598359	489.49257094048534
AATF_2	796.3922473567019	639.4317303006214	352.43439117413834	1195.4496343635408
AATF_3	1473.1832752057226	1528.831647995483	400.3988349433998	489.49257094048534
AATF_4	985.286236896611	1074.7695847512641	813.3101334787808	1089.9367912941473
AATK_1	1373.515592282655	1368.739662810408	1699.6096379107855	1584.8681685784159
AATK_2	425.24878047175497	298.6511302575377	93.84347693985933	231.69315024516305
AATK_3	933.0793553654803	900.6344429710072	870.6589249420282	692.9039281979759
AATK_4	1026.1025260936767	1276.9910397218853	1053.132352325088	1453.2490550588632
ABAT_1	1593.7337107412425	1432.4019727085665	1463.9582402618055	1429.3183071462172
ABAT_2	2777.40609745615	2790.8433206825075	3889.290766507503	3913.765044986369
ABAT_3	1202.656707271682	1299.4600902741765	1549.4600748070106	2913.024677730266
ABAT_4	1398.1952090064624	1310.6946155503222	1738.189733986061	1580.5171235033893
ABCA1_1	766.0173344658622	934.338018799444	564.1035669384877	596.0931752786355
ABCA1_2	498.33841461533785	374.4841758715206	406.6550667393904	375.27763772103873
ABCA1_3	1246.320644552264	1352.8240853358682	845.6339977580657	736.4143789482413
ABCA1_4	1474.1324912335615	1484.8297573305792	600.5982524150996	1402.1242754273012
ABCA10_1	1414.3318814797208	1427.7209205101724	849.8048189553928	2276.684335507635
ABCA10_2	1204.5551393273595	1443.636497984712	1126.121723278312	1126.9206744318728
ABCA10_3	600.8537456219217	553.3003698501717	604.7690736124267	747.2919916358076
ABCA10_4	132.89024389742343	160.09198518507506	38.5800960752755	151.19881635717212
ABCA12_1	1251.0667246914577	1502.6177556844766	1111.523849087667	1254.1887428763991
ABCA12_2	776.4587107720884	921.2310726439407	721.552067137585	1145.4126160007356
ABCA12_3	888.4662020570595	824.8013973570241	961.3742859838922	634.1648196851177
ABCA12_4	993.8291811471595	1239.5426221347334	1393.054279907245	712.4836310355953
ABCA13_1	1048.8837107618065	1173.0716809175383	1728.8053862920751	857.1558797802276
ABCA13_2	1808.2565330327975	2137.368433786704	1614.1078033655804	3325.2861985890304
ABCA13_3	1555.7650696276928	1694.5408958186308	2063.5137873775734	1407.5630817710844
ABCA13_4	1067.8680313185812	1002.6813808959965	949.9045276912427	699.4304958105157
ABCA2_1	1291.8830138885235	1312.5670364296798	1872.6987175998593	1483.7063705840487
ABCA2_2	215.4720383193937	210.64734892773035	277.3596096222509	192.53374456992424
ABCA2_3	1229.2347560511669	1591.5577474539627	1697.5242273121219	1774.13862934207
ABCA2_4	1322.257926779363	1186.1786270730415	2786.10855981449	1793.7183321796895
ABCA3_1	822.9702961361866	902.5068638503648	700.6979611509496	596.0931752786355
ABCA3_2	1267.2033971647163	1058.8540072767246	2585.9091423427903	747.2919916358076
ABCA3_3	1054.579006928839	1100.9834770622706	943.6482958952521	1404.2997979648146
ABCA3_4	1069.7664633742586	1204.9028358666176	780.986269199496	1744.769075085641
ABCA4_1	1154.2466898519065	996.1279078182449	1273.1431704840916	527.5642153469676
ABCA4_2	1390.6014807837523	1618.707850204648	1333.6200778453342	1257.452026682669
ABCA4_3	292.35853657433154	282.73555278299807	29.19574838128957	50.03701836280516
ABCA4_4	1622.2101915764047	1350.0154540168319	1354.4741838319696	865.8579699302807
ABCA5_1	1219.7425957727794	1147.7939990462107	971.8013389772099	1050.7773856189085
ABCA5_2	857.1420731383812	855.6963418664246	949.9045276912427	737.5021402169979
ABCA5_3	142.38240417581082	281.79934234331927	368.0749706641149	482.9660033279455
ABCA5_4	1124.8209929889056	1541.938594150986	1303.3816241647128	936.5624523994619
ABCA6_1	1296.6290940277172	1677.6891079044124	2090.6241251601996	1434.7571134900004
ABCA6_2	1573.800174156629	1450.1899710624637	2033.275333696952	1654.4848897788404
ABCA6_3	1215.9457316614244	1095.3662144241978	1508.7945681330716	973.5463355371875
ABCA6_4	916.9426828922217	897.8258116519708	1116.737375584326	1238.9600851138061
ABCA7_1	785.9508710504757	969.9140155072384	670.4595074703283	846.2782670926613
ABCA7_2	1041.2899825390964	1083.1954787083735	2031.1899230982885	2132.0120867630026
ABCA7_3	1009.0166375925794	1452.0623919418213	730.9364148315709	1752.3834039669375
ABCA7_4	618.8888501508577	699.3491984400648	1038.5344781344431	673.3242253603564
ABCA8_1	834.3608884702514	1022.3418001292513	974.9294548752052	714.6591535731086
ABCA8_2	815.3765679134766	738.6700369065744	2279.3537843392496	1467.3899515526994
ABCA8_3	1461.7926828716577	1066.343690794155	1496.2821045410903	1532.6556276780973
ABCA8_4	1488.3707316511425	1252.6495682902364	1686.0544690194724	1188.923066751001
ABCA9_1	900.8060104189632	839.780764391885	677.7584445656506	1050.7773856189085
ABCA9_2	1196.9614111046496	1101.9196875019495	1158.4455875575968	822.3475191800153
ABCA9_3	1132.4147212116154	1165.5819974001079	1205.3673260275264	1148.6758998070056
ABCA9_4	545.7992160072748	597.3022605150754	1021.8511933451349	963.7564841183778
ABCB1_1	1655.4327525507606	1610.2819562475388	1575.5277072903048	1585.9559298471725
ABCB1_2	2004.7442507954163	2178.5616931325712	2681.838029881313	3223.0366393259064
ABCB1_3	883.7201219178659	538.3210028153109	996.8262661611724	995.3015609123202
ABCB1_4	823.9195121640253	789.2254006492298	794.5414380908089	794.0657261923428
ABCB10_1	2199.3335365023577	1598.1112205317143	2186.5530126987223	2208.155375575967
ABCB10_2	297.1046167135253	331.41849564629575	339.9219275821571	990.9505158372936
ABCB10_3	1187.4692508262622	1180.5613644349687	605.8117789117586	526.4764540782108
ABCB10_4	661.603571403601	596.3660500753966	901.9400839219812	688.5528831229493
ABCB11_1	1208.3520034387145	1247.0323056521636	1146.9758292649474	1350.9994957957394
ABCB11_2	1256.7620208584901	1298.5238798344978	883.1713885340095	1464.1266677464293
ABCB11_3	2200.2827525301964	2251.5861074275176	2878.9093314550178	3282.8635091075216
ABCB11_4	442.3346689728523	788.289190209551	373.2884971607738	973.5463355371875
ABCB4_1	1879.4477351207029	1489.5108095289734	1322.1503195526848	1843.7553505424946
ABCB4_2	467.96350172449826	473.7224824774736	715.2958353415944	293.6955425642912
ABCB4_3	217.3704703750712	326.73744344790174	172.04637438974208	170.77851919479156
ABCB4_4	877.0756097229946	1402.4432386388448	1172.0007564489097	787.539158579803
ABCB5_1	1480.7770034284326	1142.176736408138	956.1607594872333	1123.657390625603
ABCB5_2	1280.4924215544586	1338.7809287406862	2043.7023866902698	1330.3320316893635
ABCB5_3	976.7432926460623	904.3792847297224	894.6411468266589	1826.3511702423884
ABCB5_4	1397.2459929786235	1333.1636661026134	2133.375042432802	2649.7864506911606
ABCB6_1	1172.2817943808425	1106.6007397003434	1392.0115746079132	913.7194657555726
ABCB6_2	1497.86289192953	1363.1224001723351	1109.4384384890036	852.8048347052011
ABCB6_3	1065.0203832350649	996.1279078182449	1202.239210129531	1162.8167963008418
ABCB6_4	1468.437195066529	1017.6607479308573	1887.2965917905042	1479.3553255090224
ABCB7_1	1626.9562717155984	1191.7958897111143	1339.8763096413247	1023.5833538999926
ABCB7_2	1438.0622821756892	1376.2293463278384	475.4736164952872	107.68836560690677
ABCB7_3	1365.9218640599452	1007.3624330943904	374.33120246010554	613.4973555787416
ABCB7_4	1043.188414594774	1337.8447183010076	562.0181563398241	346.99584473336625
ABCB8_1	468.91271775233696	440.95511708871555	997.8689714605041	536.2663054970205
ABCB8_2	703.3690766285055	474.6586929171524	1261.673412191442	1203.0639632448372
ABCB8_3	1359.277351865074	1419.2950265530633	2162.5707908140917	1655.572651047597
ABCB8_4	659.7051393479235	858.504973185461	1114.6519649856623	1535.9189114843673
ABCB9_1	1312.7657665009758	1085.067899587731	668.3740968716647	616.7606393850115
ABCB9_2	1028.9501741771928	1153.4112616842835	471.30279529796013	579.7767562472859
ABCB9_3	1023.2548780101605	1106.6007397003434	609.9826001090856	657.0078063290069
ABCB9_4	789.7477351618307	933.4018083597651	746.5769943215475	1054.0406694251783
ABCC1_1	769.8141985772172	731.180353389144	1632.8764987535521	568.8991435597196
ABCC1_2	1427.6209058694633	1018.5969583705361	635.007527293048	826.6985642550419
ABCC1_3	1355.480487753719	1243.2874638934486	1849.7592010145604	1029.0221602437757
ABCC1_4	508.77979092156403	575.769420402463	185.60154328105511	618.9361619225248
ABCC10_1	518.2719511999514	305.20460333528933	76.11748685121923	291.5200200267779
ABCC10_2	867.5834494446073	783.6081380111569	792.4560274921454	467.73734556535265
ABCC10_3	1134.3131532672928	1094.430003984519	1348.217952035979	1249.8376978013725
ABCC10_4	751.7790940482812	712.456144595568	502.5839542779133	448.1576427277332
ABCC11_1	1265.304965109039	1099.111056182913	941.5628852965885	1006.1791735998864
ABCC11_2	436.63937280581985	340.7806000430838	107.39864583117233	504.72122870307817
ABCC11_3	1258.6604529141678	932.4655979200863	2097.923062255522	1415.1774106523808
ABCC11_4	824.8687281918641	808.8858198824846	901.9400839219812	1076.8836560690677
ABCC12_1	840.0561846372839	807.013399003127	969.7159283785463	820.1719966425021
ABCC12_2	1051.7313588453226	818.2479242792725	336.79381168416177	1332.5075542268767
ABCC12_3	1464.640330955174	1180.5613644349687	1609.9369821682533	1609.8866777598184
ABCC12_4	1358.3281358372353	1192.7321001507933	1105.2676172916765	1280.2950133265583
ABCC2_1	1046.9852787061288	1129.0697902526347	1746.531376380715	2113.52014519414
ABCC2_2	1298.5275260833946	1130.0060006923136	1157.402882258265	1124.7451518943597
ABCC2_3	1188.418466854101	880.9740237377523	943.6482958952521	945.264542549515
ABCC2_4	898.9075783632857	719.0096176733196	1685.0117637201408	506.89675124059147
ABCC3_1	1407.6873692848496	1336.9085078613286	1795.5385254493083	1138.8860483881958
ABCC3_2	1070.7156794020973	1175.8803122365748	639.1783484903751	791.8902036548296
ABCC3_3	1598.4797908804362	1353.760295775547	1240.8193062048067	945.264542549515
ABCC3_4	849.5483449156712	775.1822440540477	642.3064643883705	853.8925959739577
ABCC4_1	1473.1832752057226	1363.1224001723351	2782.980443916495	2135.2753705692726
ABCC4_2	1547.2221253771443	1350.9516644565106	1104.2249119923447	1769.7875842670435
ABCC4_3	1370.667944199139	1330.3550347835771	1943.6026779544197	1694.7320567228358
ABCC4_4	1035.594686372064	994.2554869388873	2193.8519497940447	861.5069248552542
ABCC5_1	1623.1594076042434	1320.0567199471102	1369.0720580226143	1653.3971285100838
ABCC5_2	864.735801361091	811.694451201521	1150.1039451629426	1125.8329131631162
ABCC5_3	1101.0905922929371	918.4224413249043	858.1464613500469	1362.9648697520624
ABCC5_4	862.8373693054136	746.1597204240048	622.4950637010669	816.9087128362322
ABCC6_1	1435.2146340921731	1328.4826139042195	958.2461700858969	1348.8239732582263
ABCC6_2	1102.0398083207758	939.9552814375168	567.2316828364831	709.2203472293254
ABCC6_3	1206.4535713830371	822.9289764776665	1246.0328327014654	1093.2000751004173
ABCC6_4	2440.4344075733975	2505.299136580473	2381.5389036737633	1978.6377478683173
ABCC8_1	2633.1252612246617	2555.8545003231284	3306.4185041810433	2934.7799031053987
ABCC8_2	1608.9211671866624	1375.2931358881594	2260.585088951278	1545.7087629031769
ABCC8_3	1372.5663762548163	1419.2950265530633	1923.7912772671161	1616.4132453723582
ABCC8_4	1568.1048779895966	1282.608302359958	2151.101032521442	2575.8186844157094
ABCC9_1	1049.8329267896452	619.7713110673667	815.3955440774444	809.2943839549357
ABCC9_2	989.0831010079659	983.0209616627417	1106.3103225910083	927.8603622494088
ABCC9_3	1656.3819685785993	1660.837319990194	1467.0863561598007	2029.762527499879
ABCC9_4	924.5364111149316	975.5312781453113	1082.3281007063774	1125.8329131631162
ABCD1_1	1218.7933797449407	968.0415946278808	773.6873321041735	688.5528831229493
ABCD1_2	1316.5626306123308	1754.4583639580742	1736.1043233873975	1498.9350283466417
ABCD1_3	1608.9211671866624	1925.7848744192947	1127.1644285776435	1133.4472420444126
ABCD1_4	1170.3833623251649	1188.987258392078	1361.773120927292	943.0890200120017
ABCD2_1	1592.7844947134038	1629.9423754807935	1512.9653893303987	1661.0114573913802
ABCD2_2	861.8881532775748	1115.9628440971314	819.5663652747714	856.068118511471
ABCD2_3	897.958362335447	896.889601212292	399.356129644068	494.9313772842685
ABCD2_4	2972.94459919093	2647.603123411651	3210.4896166425206	4241.181186882116
ABCD3_1	822.0210801083479	757.3942457001505	648.5626961843611	249.0973305452692
ABCD3_2	1098.2429442094208	948.381175394626	800.7976698867996	1260.715310488939
ABCD3_3	1016.6103658152892	949.3173858343048	1103.1822066930129	1791.5428096421763
ABCD3_4	789.7477351618307	785.4805588905145	444.1924575153341	857.1558797802276
ABCD4_1	1457.9958187603029	1321.9291408264678	1047.9188258284291	993.1260383748069
ABCD4_2	1771.2371079470865	1774.118783191329	917.5806634119579	910.4561819493027
ABCD4_3	592.310801371373	569.2159473247114	410.8258879367175	403.5594307087112
ABCD4_4	556.240592313501	499.00016434880126	920.7087793099531	538.4418280345338
ABCE1_1	1259.6096689420065	1197.4131523491872	204.37023866902697	226.25434390137988
ABCE1_2	714.7596689625703	930.5931770407287	14.597874190644784	195.79702837619413
ABCE1_3	838.1577525816064	823.8651869173453	286.74395731623684	335.03047077704326
ABCE1_4	1252.9651567471353	998.9365391372813	251.29197713895664	494.9313772842685
ABCF1_1	1616.5148954093722	1209.5838880650117	374.33120246010554	388.3307729461184
ABCF1_2	1011.8642856760956	920.2948622042619	990.5700343651818	348.0836060021229
ABCF1_3	1498.8121079573687	1455.8072337005365	319.0678215955217	395.9451018274148
ABCF1_4	1018.5087978709668	867.8670775822491	88.62995044320047	275.2036009954284
ABCF2_1	1140.0084494343253	924.9759144026559	908.1963157179719	1380.3690500521686
ABCF2_2	1699.0966898313425	1726.37205076771	2139.6312742287923	1343.385166914443
ABCF2_3	1315.613414584492	1043.8746402418637	798.712259288136	1593.5702587284688
ABCF2_4	1058.3758710401937	987.7020138611357	1035.4063622364479	551.4949632596134
ABCF3_1	1640.2452961053407	1246.096095212485	1987.396300526354	1267.2418781014787
ABCF3_2	1166.58649821381	1311.630825990001	1017.6803721478078	927.8603622494088
ABCF3_3	632.1778745406001	624.4523632657606	766.3883950088511	1306.4012837767175
ABCF3_4	444.23310102852975	493.38290171072845	62.56231795990622	380.7164440648219
ABCG1_1	1458.9450347881416	1248.9047265315212	1461.8728296631418	1443.4592036400534
ABCG1_2	1102.9890243486145	726.49930119075	1036.4490675357797	1205.2394857823506
ABCG1_3	47.46080139193694	61.789889018800906	55.26338086458382	113.12717195068994
ABCG1_4	1150.4498257405514	1012.0434852927845	1501.4956310377493	1655.572651047597
ABCG2_1	522.0688153113064	570.1521577643902	557.8473351424971	1096.463358906687
ABCG2_2	749.8806619926037	657.2197286545187	900.8973786226495	1062.7427595752315
ABCG2_3	1601.3274389639523	1354.6965062152258	2227.2185193726614	1231.3457562325098
ABCG2_4	646.4161149581811	849.142868788673	982.2283919705276	851.7170734364445
ABCG4_1	2056.0019162987082	1995.0644469555261	2910.190490434971	1985.164315480857
ABCG4_2	652.1114111252135	537.3847923756321	291.95748381289565	728.8000500669448
ABCG4_3	517.3227351721126	454.9982736838976	184.55883798172334	186.00717695738442
ABCG4_4	773.6110626885721	994.2554869388873	867.5308090440328	1044.2508180063687
ABCG5_1	1610.8195992423398	1027.0228523276453	1103.1822066930129	831.0496093300684
ABCG5_2	753.6775261039586	690.9233044829556	648.5626961843611	381.8042053335785
ABCG5_3	635.0255226241163	737.7338264668956	530.7369973598711	1000.7403672561034
ABCG5_4	1451.3513065654317	1810.6309903388023	1647.474372944197	1366.2281535583325
ABCG8_1	965.3527003119974	1294.7790380757826	1169.9153458502462	662.4466126727901
ABCG8_2	741.337717742055	988.6382243008145	597.4701365171044	705.9570634230555
ABCG8_3	960.6066201728037	970.8502259469172	1456.6593031664831	1027.9343989750191
ABCG8_4	1060.2743030958713	908.1241264884376	657.947043878347	563.4603372159364
ABHD1_1	717.6073170460866	652.5386764561247	864.4026931460376	434.016746233897
ABHD1_2	97.7692508673901	122.64356759792301	607.8971895104221	68.52895993166794
ABHD1_3	385.38170730252796	396.0170159841331	336.79381168416177	509.0722737781047
ABHD1_4	1214.047299605747	1208.6476776253328	1290.8691605727315	795.1534874610995
ABHD10_1	1093.496864070227	1003.6175913356753	1301.2962135660493	1308.5768063142307
ABHD10_2	696.7245644336343	948.381175394626	583.9149676257913	1067.0938046502579
ABHD10_3	1190.3168989097785	1091.6213726654826	931.1358323032708	1287.9093422078547
ABHD10_4	1034.6454703442253	1041.0660089228275	1057.3031735224151	1283.558297132828
ABHD11_1	1046.0360626782901	1103.7921083813071	566.1889775371512	476.4394357154057
ABHD11_2	1267.2033971647163	1322.8653512661467	2519.176003185557	1410.8263655773544
ABHD11_3	644.5176829025037	607.6005753515423	920.7087793099531	737.5021402169979
ABHD11_4	1739.9129790284082	1652.4114260330848	1429.548965383857	1260.715310488939
ABHD12_1	1148.551393684874	1043.8746402418637	1238.733895606143	1027.9343989750191
ABHD12_2	839.1069686094451	739.6062473462532	873.7870408400235	1337.9463605706599
ABHD12_3	957.7589720892875	924.9759144026559	501.5412489785815	1233.521278770023
ABHD12_4	782.1540069391208	716.2009863542833	1110.4811437883354	820.1719966425021
ABHD12B_1	995.727613202837	1357.5051375342623	1255.4171803954514	759.2573655921306
ABHD12B_2	1187.4692508262622	1285.4169336789946	562.0181563398241	1268.3296393702353
ABHD12B_3	1080.2078396804848	956.8070693517352	685.0573816609731	817.9964741049888
ABHD12B_4	799.2398954402181	1061.6626385957609	739.2780572262251	507.9845125093481
ABHD13_1	1345.9883274753317	1234.8615699363393	1546.3319589090154	1392.3344240084916
ABHD13_2	898.9075783632857	991.4468556198509	936.3493587999296	707.0448246918121
ABHD13_3	982.4385888130947	1251.7133578505577	1444.1468395745019	1217.2048597386736
ABHD13_4	930.2317072819641	1034.5125358450757	996.8262661611724	852.8048347052011
ABHD14A_1	1289.0353658050074	1146.857788606532	541.1640503531887	1298.786954895421
ABHD14A_2	1130.516289155938	1323.8015617058254	953.032643589238	762.5206493984005
ABHD14A_3	787.8493031061532	1083.1954787083735	1012.4668456511489	599.3564590849054
ABHD14A_4	692.9277003222793	524.2778462201289	733.0218254302345	653.744522522737
ABHD14B_1	1287.1369337493297	999.8727495769601	1217.8797896195076	1037.724250393829
ABHD14B_2	483.15095816991806	660.9645704132339	1031.2355410391208	659.1833288665202
ABHD14B_3	1254.8635888028127	1624.3251128427207	861.2745772480422	1125.8329131631162
ABHD14B_4	1383.0077525610425	1529.7678584351618	1497.3248098404222	1023.5833538999926
ABHD15_1	1853.818902369057	1721.6909985693162	1605.7661609709262	1157.3779899570586
ABHD15_2	614.142770011664	760.2028770191869	348.26356997681125	612.409594309985
ABHD15_3	1444.7067943705604	1570.0249073413502	1423.2927335878665	934.3869298619486
ABHD15_4	2032.2715156027398	2053.109494215612	1973.8411316350412	1909.0210266678928
ABHD16A_1	1240.6253483852317	1382.7828194055899	1505.6664522350763	1434.7571134900004
ABHD16A_2	982.4385888130947	1021.4055896895725	750.7478155188746	808.2066226861791
ABHD16A_3	1271.94947730391	1178.688943555611	1162.616408754924	959.4054390433512
ABHD16A_4	1528.2378048203695	1563.4714342635987	2687.051556377972	1584.8681685784159
ABHD16B_1	1494.066027818175	1687.9874227408793	2048.9159131869287	1635.9929482099776
ABHD16B_2	1211.1996515222306	1217.0735715824421	2313.763059217198	1869.8616209926538
ABHD16B_3	1319.410278695847	1643.9855320759755	2171.9551385080777	2050.429991606255
ABHD16B_4	598.9553135662442	578.5780517214994	620.4096531024034	670.0609415540865
ABHD17A_1	584.7170731486631	611.3454171102575	104.27052993317703	101.16179799436696
ABHD17A_2	650.2129790695361	606.6643649118635	105.3132352325088	130.5313522507961
ABHD17A_3	1472.2340591778839	1496.0642826067249	873.7870408400235	666.7976577478166
ABHD17A_4	735.6424215750226	838.8445539522062	124.08193062048066	176.21732553857473
ABHD17B_1	1042.2391985669353	1011.1072748531057	1682.9263531214772	1518.514731184261
ABHD17B_2	553.3929442299848	748.9683517430412	698.612550552286	836.4884156738516
ABHD17B_3	811.5797038021217	749.90456218272	807.0539016827902	741.8531852920244
ABHD17B_4	881.8216898621884	794.8426632873026	737.1926466275615	934.3869298619486
ABHD17C_1	1331.7500870577505	1067.2799012338337	2094.7949463575264	2166.820447363215
ABHD17C_2	1060.2743030958713	1302.268721593213	1047.9188258284291	1537.006672753124
ABHD17C_3	1548.171341404983	1226.4356759792302	2011.3785224109847	2318.0192637203872
ABHD17C_4	72.14041811574415	41.19325934586727	121.99652002181712	212.11344740754365
ABHD2_1	1388.703048728075	1279.7996710409218	2115.6490523441616	1071.4448497252845
ABHD2_2	533.4594076453712	365.1220714747326	806.0111963834584	294.7833038330478
ABHD2_3	487.89703830911174	481.212165994904	544.2921662511841	938.7379749369752
ABHD2_4	615.0919860395028	599.174681394433	526.566176162544	290.4322587580213
ABHD3_1	1643.0929441888568	1761.0118370358257	2581.738321145463	2230.9983622198565
ABHD3_2	418.60426827688383	440.01890664903675	540.121345053857	580.8645175160426
ABHD3_3	1191.2661149376172	976.4674885849901	1592.210992079613	918.0705108305991
ABHD3_4	612.2443379559866	617.8988901880091	995.7835608618406	1009.4424574061563
ABHD4_1	700.5214285449892	620.7075215070455	1200.1537995308677	876.7355826178471
ABHD4_2	1065.0203832350649	776.1184544937265	763.2602791108558	436.1922687714102
ABHD4_3	955.8605400336099	1054.1729550783307	2119.819873541489	1503.2860734216683
ABHD4_4	1423.8240417581083	1497.0004930464038	1698.5669326114537	546.0561569158303
ABHD5_1	715.708884990409	823.8651869173453	1167.8299352515826	503.6334674343216
ABHD5_2	1249.1682926357803	1105.6645292606647	1271.057759885428	1398.8609916210314
ABHD5_3	960.6066201728037	923.1034935232983	1152.189355761606	1335.7708380331467
ABHD5_4	397.7215156644316	409.12396213963626	486.9433747879367	274.11583972667177
ABHD6_1	1329.8516550020731	1484.8297573305792	1374.2855845192732	2452.90166104621
ABHD6_2	489.79547036478925	598.2384709547542	806.0111963834584	1093.2000751004173
ABHD6_3	1608.9211671866624	1422.1036578720996	1449.3603660711606	2153.7673121381354
ABHD6_4	1077.3601915969687	1033.576325405397	784.1143850974912	1578.341600965876
ABHD8_1	952.063675922255	567.3435264453537	693.3990240556273	234.95643405143295
ABHD8_2	1777.881620141958	1935.1469788160828	1532.7767900177023	882.1743889616303
ABHD8_3	2011.3887629902877	2281.5448414972393	2029.104512499625	1654.4848897788404
ABHD8_4	475.55722994720816	527.0864775391653	784.1143850974912	373.1021151835255
ABI1_1	1428.570121897302	1371.5482941294442	1230.3922532114889	976.8096193434574
ABI1_2	1151.3990417683901	1433.3381831482452	1916.4923401717938	1176.957692794678
ABI1_3	877.0756097229946	794.8426632873026	864.4026931460376	923.5093171743823
ABI1_4	1153.2974738240678	1160.900945201714	1240.8193062048067	1035.5487278563155
ABI2_1	686.2831881274082	673.1353061290583	369.1176759634467	369.8388313772556
ABI2_2	1687.7060974972776	1753.5221535183953	1741.3178498840564	1449.9857712525932
ABI2_3	1784.526132336829	1857.4415123227423	1845.5883798172333	1926.425206967999
ABI2_4	523.9672473669839	480.2759555552252	790.3706168934818	634.1648196851177
ABI3_1	927.3840591984479	757.3942457001505	751.7905208182063	560.1970534096665
ABI3_2	793.5445992731857	773.3098231746901	1222.0506108168347	1102.9899265192269
ABI3_3	917.8918989200604	807.013399003127	985.3565078685228	923.5093171743823
ABI3_4	689.1308362109244	655.3473077751611	589.1284941224502	486.22928713421544
ABI3BP_1	696.7245644336343	756.4580352604717	109.48405642983587	519.949886465671
ABI3BP_2	884.6693379457046	852.8877105473882	958.2461700858969	783.1881135047765
ABI3BP_3	253.44067943294326	304.26839289561053	277.3596096222509	194.70926710743748
ABI3BP_4	608.4474738446315	693.731935801992	565.1462722378195	435.10450750265363
ABL1_1	1126.719425044583	1268.5651457647762	1445.1895448738335	1570.7272720845795
ABL1_2	1313.7149825288145	1073.8333743115854	847.7194083567292	942.0012587432451
ABL1_3	489.79547036478925	616.0264693086515	435.85081512067995	515.5988413906446
ABL1_4	658.7559233200848	583.2591039198934	839.377765962075	1145.4126160007356
ABL2_1	1100.1413762650982	844.461816590279	1536.9476112150294	1405.3875592335712
ABL2_2	1148.551393684874	1170.263049598502	1029.1501304404571	995.3015609123202
ABL2_3	1160.8912020467776	1070.0885325528702	1240.8193062048067	961.5809615808645
ABL2_4	1368.7695121434613	1417.4226056737057	1286.6983393754044	1881.8269949489768
ABLIM1_1	785.001655022637	784.5443484508357	638.1356431910434	687.4651218541927
ABLIM1_2	1324.1563588350407	986.7658034214569	1150.1039451629426	244.74628547024267
ABLIM1_3	383.4832752468505	402.5704890618847	511.96830197189917	317.62629047693713
ABLIM1_4	910.2981706973505	784.5443484508357	718.4239512395897	935.4746911307053
ABLIM2_1	734.6932055471839	684.369831405204	529.6942920605393	1013.7935024811829
ABLIM2_2	1132.4147212116154	1255.458199609273	966.5878124805511	1291.1726260141245
ABLIM2_3	1267.2033971647163	1270.4375666441338	619.3669478030715	432.92898496514033
ABLIM2_4	949.2160278387388	1158.0923138826774	606.8544842110903	1443.4592036400534
ABLIM3_1	2144.279006887711	2018.469707947496	1965.499489240387	2315.843741182874
ABLIM3_2	1016.6103658152892	726.49930119075	949.9045276912427	684.2018380479228
ABLIM3_3	1655.4327525507606	1255.458199609273	2990.478798483517	2907.5858713864827
ABLIM3_4	1184.621602742746	1320.0567199471102	1178.2569882449004	1112.7797779380367
ABO_1	1223.5394598841344	1239.5426221347334	1236.6484850074796	1680.5911602289996
ABO_2	694.8261323779568	916.5500204455467	500.49854367924974	541.7051118408037
ABO_3	600.8537456219217	766.7563500969385	1052.0896470257562	1049.689624350152
ABO_4	1152.3482577962288	1012.0434852927845	1610.979687467585	1024.6711151687493
ABR_1	859.0405051940586	474.6586929171524	1003.082497957163	565.6358597534497
ABR_2	1518.745644541982	1658.9648991108363	1666.2430683321688	1366.2281535583325
ABR_3	1136.2115853229704	747.0959308636836	1004.1252032564947	1058.391714500205
ABR_4	548.646864090791	580.450472600857	401.44154024273155	738.5899014857545
ABRA_1	442.3346689728523	332.35470608597456	196.0285962743728	292.60778129553455
ABRA_2	587.5647212321793	507.42605830591043	204.37023866902697	208.85016360127372
ABRA_3	694.8261323779568	513.9795313836621	270.0606725269285	288.256736220508
ABRA_4	1416.2303135353984	1386.527661164305	1935.2610355597656	693.9916894667325
ABRACL_1	656.8574912644073	728.3717220701076	1106.3103225910083	730.9755726044581
ABRACL_2	958.7081881171262	889.3999176948615	1156.3601769589332	1288.9971034766113
ABRACL_3	672.9941637376659	806.0771885634482	599.5555471157679	912.6317044868159
ABRACL_4	1499.7613239852074	1504.4901765638342	1784.0687671566589	1944.9171485368618
ABT1_1	927.3840591984479	619.7713110673667	394.14260314740915	580.8645175160426
ABT1_2	773.6110626885721	923.1034935232983	477.55902709395076	288.256736220508
ABT1_3	1235.879268246038	1217.0735715824421	20.854105986635403	89.19642403804399
ABT1_4	917.8918989200604	917.4862308852255	598.5128418164361	410.08599832125105
ABTB1_1	735.6424215750226	773.3098231746901	851.8902295540563	735.3266176794846
ABTB1_2	1147.6021776570353	1038.257377603791	1027.0647198417937	924.5970784431389
ABTB1_3	1065.9695992629038	1206.7752567459752	581.8295570271277	994.2137996435636
ABTB1_4	402.4675958036253	497.12774346944366	516.1391231692263	625.4627295350646
ABTB2_1	1448.5036584819154	1332.2274556629347	1406.609448798558	1260.715310488939
ABTB2_2	1956.3342333756407	2342.3985200763614	1875.8268334978548	1897.0556527115698
ABTB2_3	999.5244773141919	1181.4975748746476	867.5308090440328	435.10450750265363
ABTB2_4	1337.445383224783	1288.225564998031	974.9294548752052	1007.2669348686431
ACAA1_1	1284.2892856658136	1434.2743935879241	1288.783749974068	961.5809615808645
ACAA1_2	1437.1130661478505	1119.7076858558466	1612.0223927669167	1219.3803822761868
ACAA1_3	854.294425054865	1027.9590627673242	640.221053789707	1108.42873286301
ACAA1_4	78.78493031061532	117.962515399529	21.896811285967175	89.19642403804399
ACAA2_1	745.1345818534099	809.8220303221634	832.0788288667527	719.0101986481351
ACAA2_2	1272.8986933317487	1386.527661164305	2461.8272117223096	1650.1338447038138
ACAA2_3	945.4191637273839	747.0959308636836	790.3706168934818	1312.9278513892573
ACAA2_4	585.6662891765019	576.7056308421418	1469.1717667584642	952.8788714308114
ACACA_1	1055.5282229566776	981.1485407833841	554.7192192445018	542.7928731095603
ACACA_2	1496.913675901691	1237.6702012553758	624.5804742997303	698.342734541759
ACACA_3	885.6185539735433	978.3399094643477	540.121345053857	791.8902036548296
ACACA_4	880.8724738343496	945.5725440755896	435.85081512067995	357.8734574209326
ACACB_1	1024.204094037999	1038.257377603791	568.2743881358148	752.7307979795908
ACACB_2	1306.1212543061047	1041.0660089228275	957.2034647865651	1073.620372262798
ACACB_3	2205.978048697229	1963.2332920064468	1312.7659718586988	2209.2431368447237
ACACB_4	625.5333623457288	725.5630907510712	383.71555015409143	344.820322195853
ACAD10_1	1162.789634102455	1088.8127413464463	1057.3031735224151	948.5278263557849
ACAD10_2	1180.824738631391	861.3136045044974	678.8011498649824	378.5409215273086
ACAD10_3	1457.9958187603029	1402.4432386388448	944.6910011945838	1089.9367912941473
ACAD10_4	502.13527872669283	583.2591039198934	633.9648219937163	441.6310751151934
ACAD11_1	1498.8121079573687	1544.7472254700226	1863.3143699058735	2042.8156627249587
ACAD11_2	590.4123693156955	477.4673242361888	994.7408555625088	861.5069248552542
ACAD11_3	935.9270034489965	825.737607796703	811.2247228801173	931.1236460556787
ACAD11_4	367.34660277359194	435.33785445064274	1207.45273662619	1005.0914123311298
ACAD8_1	1035.594686372064	1051.3643237592942	643.3491696877022	1339.0341218394165
ACAD8_2	1386.8046166723975	1115.0266336574527	1591.1682867802815	1643.607277091274
ACAD8_3	298.053832741364	546.7468967724201	1326.3211407500119	449.24540399648987
ACAD8_4	1140.957665462164	1191.7958897111143	682.9719710623095	665.70989647906
ACAD9_1	2597.055052166789	2335.84504699861	4172.9066079257445	4696.953158491146
ACAD9_2	819.1734320248316	712.456144595568	540.121345053857	640.6913872976575
ACAD9_3	1253.914372774974	1116.8990545368104	1003.082497957163	604.7952654286885
ACAD9_4	1122.922560933228	1071.9609534322278	1006.2106138551583	764.6961719359138
ACADL_1	2114.85331002471	1858.3777227624212	1461.8728296631418	1679.503398960243
ACADL_2	1583.2923344350163	1576.578380419102	980.142981371864	1054.0406694251783
ACADL_3	1329.8516550020731	1442.7002875450332	1118.8227861829894	1577.2538396971192
ACADL_4	1228.285540023328	773.3098231746901	1583.869349684959	1559.8496593970133
ACADM_1	1391.550696811591	1413.6777639149905	1113.6092596863307	911.5439432180593
ACADM_2	1294.7306619720398	1561.599013384241	1923.7912772671161	1162.8167963008418
ACADM_3	1430.4685539529794	1467.041758976682	1111.523849087667	1009.4424574061563
ACADM_4	1181.7739546592297	1535.3851210732346	1243.947422102802	1340.121883108173
ACADS_1	1890.8383274547678	2055.9181255346484	1377.4137004172685	1477.179802971509
ACADS_2	860.9389372497361	725.5630907510712	353.4770964734701	335.03047077704326
ACADS_3	992.8799651193208	1097.2386353035554	814.3528387781125	973.5463355371875
ACADS_4	1084.9539198196785	1297.587669394819	688.1854975589683	801.6800550736393
ACADSB_1	1818.6979093390237	1835.90867221013	1564.0579489976553	1694.7320567228358
ACADSB_2	1206.4535713830371	1149.6664199255683	1789.2822936533178	1527.216821334314
ACADSB_3	1192.215330965456	882.8464446171099	1383.669932213259	1176.957692794678
ACADSB_4	747.9822299369262	707.775092397174	979.1002760725322	746.204230367051
ACADVL_1	1244.4222124965866	1654.2838469124424	1409.7375646965534	1841.5798280049814
ACADVL_2	656.8574912644073	689.050883603598	809.1393122814537	766.8716944734269
ACADVL_3	1257.7112368863288	1339.7171391803652	1250.2036538987925	1435.844874758757
ACADVL_4	168.96045295529552	157.28335386603865	92.80077164052756	315.4507679394239
ACAN_1	2119.599390163904	2134.5598024676674	2294.994363829226	2211.418659382237
ACAN_2	1456.0973867046253	1583.1318534968534	1166.787229952251	1241.1356076513193
ACAN_3	1146.6529616291964	1267.6289353250972	1038.5344781344431	1022.495592631236
ACAN_4	1203.6059232995208	1012.0434852927845	677.7584445656506	673.3242253603564
ACAP1_1	1077.3601915969687	804.2047676840906	1201.1965048301993	1374.9302437083854
ACAP1_2	1465.5895469830127	1328.4826139042195	1778.8552406600002	1841.5798280049814
ACAP1_3	929.2824912541253	829.4824495554182	1189.7267465375498	972.4585742684309
ACAP1_4	2129.091550442291	1929.52971617801	2086.4533039628723	1256.3642654139123
ACAP2_1	1330.8008710299118	1209.5838880650117	1105.2676172916765	1409.7386043085978
ACAP2_2	993.8291811471595	903.4430742900436	691.3136134569637	774.4860233547234
ACAP2_3	762.2204703545073	708.7113028368528	642.3064643883705	1360.7893472145493
ACAP2_4	1852.869686341218	1766.6290996738985	2899.763437441653	2242.9637361761793
ACAP3_1	1480.7770034284326	1238.6064116950545	1139.6768921696248	1380.3690500521686
ACAP3_2	1188.418466854101	908.1241264884376	650.6481067830247	672.2364640915998
ACAP3_3	1553.8666375720154	1438.955445786318	1568.2287701949824	1895.9678914428132
ACAP3_4	1028.0009581493541	1202.0942045475813	1576.5704125896366	1323.8054640768237
ACAT1_1	2290.4582751748767	1673.9442661456972	2150.05832722211	2025.4114824248525
ACAT1_2	1334.5977351412669	909.9965473677952	1069.8156371143962	1449.9857712525932
ACAT1_3	909.3489546695118	922.1672830836195	855.0183454520516	918.0705108305991
ACAT1_4	882.770905890027	1201.1579941079024	2098.9657675548533	2050.429991606255
ACAT2_1	758.4236062431523	711.5199341558892	869.6162196426964	383.9797278710918
ACAT2_2	653.0606271530523	948.381175394626	1382.6272269139274	499.282422359295
ACAT2_3	1588.9876306020487	1102.8558979416282	1951.944320349074	1703.434146872889
ACAT2_4	693.8769163501181	789.2254006492298	1076.071868910387	900.6663305304929
ACBD3_1	1725.6747386108273	1368.739662810408	2069.770019173564	1397.7732303522748
ACBD3_2	1979.1154180437704	1784.4170980277959	1781.9833565579954	1384.7200951271952
ACBD3_3	1449.452874509754	1214.2649402634056	1841.4175586199062	1314.0156126580139
ACBD3_4	126.24573170255226	123.57977803760181	149.10685780444314	57.6513472441016
ACBD4_1	1326.054790890718	1276.0548292822066	660.0324544770106	1342.2974056456865
ACBD4_2	1354.5312717258803	1825.610357373663	1425.3781441865299	1012.7057412124262
ACBD4_3	1321.3087107515244	944.6363336359108	1104.2249119923447	1278.119490789045
ACBD4_4	1234.9300522181993	1421.1674474324209	815.3955440774444	649.3934774477106
ACBD5_1	992.8799651193208	1080.386847389337	1058.3458788217467	962.6687228496211
ACBD5_2	1618.4133274650496	1418.3588161133844	1726.7199756934115	1537.006672753124
ACBD5_3	1314.6641985566532	1028.895273207003	1118.8227861829894	695.0794507354891
ACBD5_4	978.6417247017397	932.4655979200863	1614.1078033655804	1206.3272470511072
ACBD6_1	1108.684320515647	1435.2106040276028	1265.844233388769	2085.2383522064674
ACBD6_2	1544.3744772936282	1399.6346073198083	2430.5460527423566	2276.684335507635
ACBD6_3	1093.496864070227	1187.1148375127204	690.2709081576319	1006.1791735998864
ACBD6_4	600.8537456219217	268.69239618781603	1868.5278964025324	813.6454290299623
ACBD7_1	1672.5186410518577	1467.041758976682	2918.532132829625	1521.7780149905311
ACBD7_2	1333.648519113428	1027.9590627673242	996.8262661611724	773.3982620859668
ACBD7_3	755.5759581596361	642.2403616196578	555.7619245438335	465.56182302783935
ACBD7_4	1011.8642856760956	1056.981586397367	1188.684041238218	1187.8353054822444
ACCS_1	2018.0332751851588	2192.6048497277534	1940.4745620564245	1419.5284557274074
ACCS_2	952.063675922255	1032.640114965718	1734.018912788734	1240.0478463825627
ACCS_3	379.6864111354955	390.39975334606027	160.57661609709263	98.9862754568537
ACCS_4	1234.9300522181993	1232.9891490569817	1655.8160153388512	1665.3625024664068
ACCSL_1	1377.31245639401	1808.7585694594447	1418.0792070912075	2039.5523789186889
ACCSL_2	1751.3035713624731	1872.420879357603	2260.585088951278	2126.5732804192194
ACCSL_3	298.053832741364	320.1839703701501	213.7545863630129	478.614958252919
ACCSL_4	1054.579006928839	908.1241264884376	1535.9049059156976	1066.0060433815013
ACD_1	1439.011498203528	1233.9253594966606	782.0289744988277	1369.4914373646022
ACD_2	1120.0749128497118	1214.2649402634056	779.9435639001641	890.8764791116832
ACD_3	691.9784842944406	810.7582407618422	1311.723266559367	1494.5839832716151
ACD_4	871.3803135559623	954.9346484723776	468.1746793999648	617.8484006537682
ACE_1	1461.7926828716577	1134.6870528907075	1426.4208494858617	1652.3093672413272
ACE_2	1782.6277002811514	1996.000657395205	1236.6484850074796	1959.058045030698
ACE_3	1006.1689895090632	911.8689682471527	594.342020619109	776.6615458922367
ACE_4	182.24947734503786	223.7542950832336	52.135264966588515	214.2889699450569
ACE2_1	1683.9092333859226	1517.5971227193374	2544.2009303695195	2784.6688480169832
ACE2_2	1258.6604529141678	1286.3531441186733	2650.55687090136	2054.781036681282
ACE2_3	712.8612369068928	669.3904643703431	622.4950637010669	670.0609415540865
ACE2_4	1046.0360626782901	1239.5426221347334	1212.6662631228487	1742.5935525481277
ACER1_1	1043.188414594774	1120.6438962955256	492.15690128459556	1008.3546961373997
ACER1_2	975.7940766182235	988.6382243008145	399.356129644068	903.9296143367629
ACER1_3	990.9815330636434	983.9571721024205	717.3812459402579	1332.5075542268767
ACER1_4	1857.6157664804118	2153.2840112612434	795.5841433901408	978.9851418809707
ACER2_1	813.4781358577992	674.0715165687371	1175.1288723469052	1236.784562576293
ACER2_2	1179.8755226035523	1196.4769419095085	1909.1934030764714	1466.3021902839428
ACER2_3	1195.0629790489722	893.1447594535767	1568.2287701949824	1389.0711402022216
ACER2_4	1432.3669860086568	1398.6983968801296	1278.3566969807503	2155.9428346756486
ACER3_1	1323.207142807202	1107.5369501400223	2159.442674916096	1647.9583221663006
ACER3_2	917.8918989200604	880.0378132980735	1077.1145742097187	640.6913872976575
ACER3_3	1177.977090547875	870.6757089012855	1058.3458788217467	992.0382771060503
ACER3_4	829.6148083310577	675.0077270084159	487.9860800872685	797.3290099986127
ACHE_1	560.0374564248559	735.861405587538	960.3315806845604	1049.689624350152
ACHE_2	874.2279616394785	1008.2986435340692	622.4950637010669	647.2179549101972
ACHE_3	1042.2391985669353	978.3399094643477	763.2602791108558	862.5946861240108
ACHE_4	1448.5036584819154	1637.432058998224	2776.724212120504	2083.0628296689542
ACIN1_1	747.9822299369262	632.8782572228698	723.6374777362486	534.0907829595074
ACIN1_2	1826.2916375617335	1886.4640359527853	1486.8977568471043	1486.9696543903187
ACIN1_3	871.3803135559623	907.1879160487588	951.9899382899063	538.4418280345338
ACIN1_4	1204.5551393273595	1170.263049598502	966.5878124805511	866.9457311990374
ACKR1_1	1301.375174166911	1438.019235346639	447.32057341332944	524.3009315406977
ACKR1_2	1442.808362314883	1144.0491572874955	1347.175246736647	1528.304582603071
ACKR1_3	1071.6648954299362	1453.9348128211789	1730.8907968907386	2835.7936276485448
ACKR1_4	1689.604529552955	1782.5446771484383	1120.908196781653	1118.2185842818199
ACKR2_1	2373.040069596847	2612.963337143535	2922.702954026952	2247.314781251206
ACKR2_2	1300.4259581390722	1567.2162760223139	1746.531376380715	2202.7165692321837
ACKR2_3	972.9464285347073	1126.2611589335984	844.591292458734	1112.7797779380367
ACKR2_4	664.4512194871172	890.3361281345403	401.44154024273155	391.59405675238827
ACKR3_1	1124.8209929889056	1023.2780105689301	1951.944320349074	2246.2270199824493
ACKR3_2	1678.2139372188901	1315.3756677487163	1534.8622006163657	1334.6830767643899
ACKR3_3	2193.6382403353255	2272.1827371004515	3097.8774443146895	2924.990051686589
ACKR3_4	1121.9733449053892	1130.9422111319923	1114.6519649856623	1527.216821334314
ACKR4_1	945.4191637273839	645.0489929386943	902.982789221313	995.3015609123202
ACKR4_2	678.6894599046983	617.8988901880091	1417.0365017918757	1655.572651047597
ACKR4_3	1572.8509581287901	1404.3156595182024	1485.8550515477725	1696.9075792603492
ACKR4_4	1607.9719511588235	1417.4226056737057	2555.6706886621687	2279.947619313905
ACLY_1	873.2787456116397	1283.544512799637	715.2958353415944	1055.1284306939351
ACLY_2	1374.4648083104937	1440.8278666656756	826.8653023700938	1386.8956176647084
ACLY_3	1701.9443379148588	2202.9031645642203	1323.1930248520164	1991.690883093397
ACLY_4	460.3697735017883	665.6456226116279	92.80077164052756	188.1826994948977
ACMSD_1	1064.0711672072262	1103.7921083813071	641.2637590890387	952.8788714308114
ACMSD_2	716.6581010182479	689.050883603598	788.2852062948183	599.3564590849054
ACMSD_3	1339.3438152804604	1301.3325111535341	1259.5880015927785	885.4376727679002
ACMSD_4	1643.0929441888568	1314.4394573090374	1028.1074251411255	1562.0251819345265
ACO1_1	1496.913675901691	1526.9592271161255	641.2637590890387	1440.1959198337834
ACO1_2	408.1628919706577	405.3791203809211	333.66569578616645	203.41135725749058
ACO1_3	1162.789634102455	1492.3194408480097	803.9257857847948	1272.680684445262
ACO1_4	1031.7978222607092	1401.507028199166	782.0289744988277	858.2436410489843
ACO2_1	1046.9852787061288	1159.0285243223564	539.0786397545252	527.5642153469676
ACO2_2	1073.5633274856136	1065.407480354476	511.96830197189917	404.64719197746786
ACO2_3	2046.509756020321	1799.3964650626567	405.61236144005863	412.2615208587643
ACO2_4	429.04564458310995	371.6755445524842	149.10685780444314	83.75761769426082
ACOT1_1	949.2160278387388	792.970242407945	731.9791201309027	647.2179549101972
ACOT1_2	1317.5118466401696	888.4637072551827	1767.3854823673505	1810.034751211039
ACOT1_3	1592.7844947134038	1661.7735304298728	2376.325377177104	1909.0210266678928
ACOT1_4	1059.3250870680324	929.6569666010499	660.0324544770106	1240.0478463825627
ACOT11_1	1040.3407665112577	1073.8333743115854	970.7586336778782	1352.087257064496
ACOT11_2	277.17108012891174	249.03197695456123	208.54105986635406	649.3934774477106
ACOT11_3	1137.1608013508092	1476.4038633734701	1507.7518628337398	1669.7135475414332
ACOT11_4	581.8694250651469	665.6456226116279	471.30279529796013	615.6728781162549
ACOT12_1	1389.6522647559136	1605.6009040491447	1262.7161174907737	1203.0639632448372
ACOT12_2	1939.2483448745434	1846.2069870465966	1559.8871278003282	1451.0735325213498
ACOT12_3	1195.0629790489722	983.0209616627417	1181.3851041428957	1641.4317545537608
ACOT12_4	816.3257839413154	851.9515001077094	1172.0007564489097	350.25912853963615
ACOT13_1	1388.703048728075	1432.4019727085665	1718.3783332987573	1367.315914827089
ACOT13_2	798.2906794123793	1013.9159061721421	567.2316828364831	1017.0567862874528
ACOT13_3	912.1966027530281	747.0959308636836	1280.442107579414	530.8274991532375
ACOT13_4	955.8605400336099	1040.1297984831485	986.3992131678547	936.5624523994619
ACOT2_1	1124.8209929889056	1094.430003984519	2066.6419032755684	1522.8657762592877
ACOT2_2	1638.3468640496633	1465.1693380973245	1767.3854823673505	2240.788213638666
ACOT2_3	1193.1645469932946	1273.24619796317	1278.3566969807503	1187.8353054822444
ACOT2_4	556.240592313501	626.3247841451182	1153.232061060938	665.70989647906
ACOT4_1	1060.2743030958713	999.8727495769601	712.167719443599	1299.8747161641777
ACOT4_2	1431.417769980818	1177.7527331159324	1983.225479329027	1695.8198179915926
ACOT4_3	1368.7695121434613	1282.608302359958	1187.6413359388864	1362.9648697520624
ACOT4_4	1487.4215156233038	1599.0474309713932	1705.865869706776	1560.9374206657699
ACOT6_1	1465.5895469830127	1496.0642826067249	1332.5773725460024	1194.3618730947842
ACOT6_2	864.735801361091	791.0978215285874	755.9613420155334	395.9451018274148
ACOT6_3	837.2085365537677	874.4205506600007	1498.3675151397538	1167.1678413758684
ACOT6_4	953.0128919500937	782.6719275714781	1045.8334152297655	819.0842353737454
ACOT7_1	1222.5902438562955	1107.5369501400223	1115.6946702849941	883.2621502303869
ACOT7_2	1012.8135017039343	1047.619482000579	1040.6198887331068	845.1905058239047
ACOT7_3	1066.9188152907425	1175.8803122365748	1188.684041238218	1325.9809866143369
ACOT7_4	712.8612369068928	989.5744347404933	937.3920640992615	1354.2627796020095
ACOT8_1	691.9784842944406	735.861405587538	549.5056927478429	716.8346761106218
ACOT8_2	1522.542508653337	1090.6851622258039	1511.9226840310669	1077.9714173378243
ACOT8_3	781.2047909112821	718.0734072336409	1080.242690107714	687.4651218541927
ACOT8_4	1639.296080077502	1602.7922727301084	1742.360555183388	1680.5911602289996
ACOT9_1	1716.1825783324398	1178.688943555611	1715.250217400762	2146.152983256839
ACOT9_2	1639.296080077502	2072.7699134488666	2395.094072565076	2160.2938797506754
ACOT9_3	1718.0810103881172	1571.8973282207078	2533.7738773762017	2551.8879365030634
ACOT9_4	1163.7388501302937	1104.7283188209858	1355.5168891313012	1484.7941318528055
ACOX1_1	896.0599302797694	911.8689682471527	515.0964178698945	661.3588514040335
ACOX1_2	752.7283100761199	759.2666665795081	637.0929378917116	368.75107010849894
ACOX1_3	335.0732578270748	214.39219068644556	75.07478155188745	217.55225375132682
ACOX1_4	1371.6171602269776	1450.1899710624637	1248.118243300129	1009.4424574061563
ACOX2_1	2231.606881448875	2447.2540893203873	2030.1472177989567	2078.711784593928
ACOX2_2	848.5991288878325	1180.5613644349687	367.03226536478314	853.8925959739577
ACOX2_3	1214.047299605747	1134.6870528907075	913.4098422146308	1390.1589014709782
ACOX2_4	928.3332752262866	1094.430003984519	718.4239512395897	777.7493071609933
ACOX3_1	1217.844163717102	1033.576325405397	1836.2040321232473	1162.8167963008418
ACOX3_2	2014.2364110738038	1527.8954375558042	1687.0971743188043	1688.205489110296
ACOX3_3	1961.0803135148344	1931.4021370573676	2068.727313874232	1799.1571385234727
ACOX3_4	1383.0077525610425	1412.7415534753115	1885.2111811918405	974.6340968059441
ACOXL_1	810.630487774283	1032.640114965718	847.7194083567292	1842.667589273738
ACOXL_2	859.0405051940586	1110.3455814590586	1006.2106138551583	1009.4424574061563
ACOXL_3	742.2869337698937	713.3923550352469	694.441729354959	1200.888440707324
ACOXL_4	752.7283100761199	671.2628852497007	503.62665957724505	571.0746660972329
ACP1_1	1426.6716898416244	971.786436386596	1396.1823958052403	1963.4090901057245
ACP1_2	1710.4872821654074	1594.366378772999	2775.681506821172	3908.3262386425863
ACP1_3	720.4549651296028	804.2047676840906	813.3101334787808	1455.4245775963764
ACP1_4	1117.2272647661955	878.1653924187159	993.698150263177	1139.9738096569524
ACP2_1	542.9515679237586	808.8858198824846	1152.189355761606	618.9361619225248
ACP2_2	1385.8554006445586	1412.7415534753115	1057.3031735224151	1732.803701129318
ACP2_3	1590.8860626577264	1407.1242908372387	1308.5951506613717	1819.8246026298486
ACP2_4	1084.9539198196785	1202.0942045475813	911.3244316159672	1091.0245525629039
ACP5_1	945.4191637273839	1057.9177968370457	474.43091119595545	1212.853814663647
ACP5_2	1520.6440765976595	1564.4076447032774	1597.424518576272	2747.6849648792577
ACP5_3	1445.6560103983993	1440.8278666656756	1383.669932213259	1233.521278770023
ACP5_4	856.1928571105424	822.9289764776665	831.0361235674209	849.5415508989312
ACP6_1	895.1107142519307	685.3060418448828	772.6446268048418	821.2597579112587
ACP6_2	1513.9995644027883	1913.6141387034704	1510.879978731735	1299.8747161641777
ACP6_3	672.044947709827	704.0302506384588	1127.1644285776435	654.8322837914936
ACP6_4	138.58554006445587	200.34903409126355	98.0142981371864	109.86388814442003
ACPP_1	1259.6096689420065	1119.7076858558466	1502.5383363370809	1071.4448497252845
ACPP_2	1340.2930313082993	1374.3569254484808	1236.6484850074796	2271.2455291638516
ACPP_3	2240.1498256994237	2404.1884090951626	3354.3829479503047	2870.601988248757
ACPP_4	1179.8755226035523	1056.045375957688	1124.0363126796483	858.2436410489843
ACPT_1	1295.6798779998785	1565.3438551429563	1274.1858757834232	2117.8711902691666
ACPT_2	2105.3611497463226	2000.681709593599	1997.8233535196719	2443.1118096274
ACPT_3	840.0561846372839	908.1241264884376	1500.4529257384174	1171.5188864508948
ACPT_4	694.8261323779568	771.4374022953325	1136.5487762716295	715.7469148418652
ACR_1	834.3608884702514	613.2178379896151	759.0894579135287	1153.026944882032
ACR_2	1716.1825783324398	2138.3046442263826	1693.3534061147948	1391.246662739735
ACR_3	1109.6335365434857	916.5500204455467	1271.057759885428	1979.725509137074
ACR_4	1166.58649821381	1266.6927248854186	2110.435525847503	1380.3690500521686
ACRBP_1	248.69459929374958	221.88187420387598	159.53391079776085	280.64240733921156
ACRBP_2	1529.1870208482082	1390.2725029230203	1493.153988643095	1074.7081335315545
ACRBP_3	864.735801361091	973.6588572659537	701.7406664502814	920.2460333681124
ACRBP_4	1047.9344947339678	1072.8971638719065	1370.1147633219462	667.8854190165733
ACRC_1	938.7746515325127	778.9270858127629	1542.1611377116883	1321.6299415393103
ACRC_2	1652.5851044672443	2093.3665431218005	1500.4529257384174	2734.631829654178
ACRC_3	1346.9375435031704	1299.4600902741765	2676.6245033846544	1527.216821334314
ACRC_4	536.3070557288875	473.7224824774736	498.4131330805862	289.34449748926465
ACRV1_1	1890.8383274547678	2043.7473898188239	2421.1617050483705	3707.090403922609
ACRV1_2	1157.0943379354226	1441.7640771053543	1552.588190705006	1021.4078313624793
ACRV1_3	1513.9995644027883	1381.8466089659112	1865.399780504537	2104.818055044087
ACRV1_4	1009.9658536204181	1016.7245374911785	1021.8511933451349	1378.1935275146552
ACSBG1_1	1087.8015679031946	1041.0660089228275	737.1926466275615	962.6687228496211
ACSBG1_2	1190.3168989097785	646.9214138180519	571.4025040338101	678.7630317041396
ACSBG1_3	1186.5200347984235	955.8708589120564	657.947043878347	1300.9624774329343
ACSBG1_4	1104.887456404292	1145.9215781668531	985.3565078685228	1810.034751211039
ACSBG2_1	1358.3281358372353	1230.1805177379454	1376.3709951179367	1476.0920417027523
ACSBG2_2	1431.417769980818	1146.857788606532	1297.1253923687223	2025.4114824248525
ACSBG2_3	1054.579006928839	704.9664610781376	905.0681998199766	1095.3755976379305
ACSBG2_4	579.9709930094695	900.6344429710072	625.6231795990622	652.6567612539804
ACSF2_1	824.8687281918641	669.3904643703431	1142.8050080676203	827.7863255237985
ACSF2_2	1954.4358013199633	2201.0307436848625	954.0753488885698	1117.1308230130633
ACSF2_3	1110.5827525713244	877.2291819790371	1349.2606573353107	1014.8812637499395
ACSF2_4	1097.293728181582	968.9778050675596	1414.9510911932123	764.6961719359138
ACSF3_1	1888.9398953990903	1940.7642414541556	3318.930967773025	2746.597203610501
ACSF3_2	956.8097560614488	1065.407480354476	793.4987327914772	1496.7595058091285
ACSF3_3	1158.9927699911002	939.9552814375168	1517.1362105277258	1528.304582603071
ACSF3_4	999.5244773141919	823.8651869173453	1520.264326425721	1299.8747161641777
ACSL1_1	1343.1406793918154	1313.5032468693587	1700.6523432101174	1039.899772931342
ACSL1_2	697.673780461473	692.7957253623132	508.8401860739039	815.8209515674755
ACSL1_3	1531.0854529038857	1365.9310314913714	1955.0724362470692	1268.3296393702353
ACSL1_4	685.3339720995695	600.1108918341118	654.8189279803518	740.7654240232678
ACSL3_1	1343.1406793918154	1316.311878188395	447.32057341332944	378.5409215273086
ACSL3_2	1092.5476480423883	732.1165638288228	349.306275276143	310.0119615956407
ACSL3_3	1102.0398083207758	813.5668720808786	270.0606725269285	244.74628547024267
ACSL3_4	1549.1205574328217	1292.906617196425	569.3170934351466	505.8089899718348
ACSL4_1	1373.515592282655	867.8670775822491	456.7049211073154	561.2848146784231
ACSL4_2	1399.144425034301	1152.4750512446046	303.42724210554513	764.6961719359138
ACSL4_3	1312.7657665009758	1505.426387003513	528.6515867612076	500.3701836280517
ACSL4_4	871.3803135559623	975.5312781453113	290.9147785135639	529.7397378844807
ACSL5_1	1370.667944199139	1526.0230166764466	1803.8801678439625	1455.4245775963764
ACSL5_2	1074.5125435134523	939.9552814375168	1310.6805612600351	811.469906492449
ACSL5_3	1011.8642856760956	1043.8746402418637	1316.9367930560259	1411.914126846111
ACSL5_4	766.966550493701	914.6775995661891	832.0788288667527	759.2573655921306
ACSL6_1	1294.7306619720398	951.1898067136624	734.0645307295663	445.98212019022
ACSL6_2	1149.5006097127127	1168.3906287191444	1914.4069295731301	1486.9696543903187
ACSL6_3	348.36228221681716	409.12396213963626	161.6193213964244	308.9242003268841
ACSL6_4	773.6110626885721	733.0527742685016	206.45564926769052	403.5594307087112
ACSM1_1	931.1809233098028	821.9927660379877	381.6301395554279	770.134978279697
ACSM1_2	597.0568815105668	823.8651869173453	665.2459809736695	1081.2347011440943
ACSM1_3	1354.5312717258803	1758.2032057167894	1014.5522562498124	1334.6830767643899
ACSM1_4	1088.7507839310333	1107.5369501400223	535.9505238565299	1077.9714173378243
ACSM2A_1	1393.4491288672687	1184.306206193684	1096.9259748970223	1088.8490300253907
ACSM2A_2	1289.0353658050074	1849.0156183656331	1615.1505086649122	1634.905186941221
ACSM2A_3	1364.9726480321065	1578.4508012984595	1550.5027801063425	1330.3320316893635
ACSM2A_4	1867.1079267587993	1322.8653512661467	3236.557249125815	2655.2252570349438
ACSM2B_1	1009.9658536204181	1175.8803122365748	877.9578620373505	1943.829387268105
ACSM2B_2	867.5834494446073	1007.3624330943904	1300.2535082667175	1242.2233689200762
ACSM2B_3	1096.3445121537434	1000.8089600166389	1549.4600748070106	1887.26580129276
ACSM2B_4	539.1547038124037	630.0696259038334	543.2494609518523	438.36779130892353
ACSM3_1	1032.7470382885479	1123.4525276145619	1132.3779550743025	1865.5105759176274
ACSM3_2	840.0561846372839	512.1071105043045	308.640768602204	1071.4448497252845
ACSM3_3	1068.81724734642	1273.24619796317	1602.638045072931	1244.3988914575893
ACSM3_4	1413.382665451882	1539.1299628319498	1140.7195974689566	1433.6693522212436
ACSM4_1	1252.0159407192964	1381.8466089659112	832.0788288667527	1537.006672753124
ACSM4_2	1612.7180312980172	1629.0061650411149	1395.1396905059087	1203.0639632448372
ACSM4_3	80.6833623662928	103.91935880434697	176.21719558706917	69.61672120042458
ACSM4_4	1888.9398953990903	1990.3833947571322	4018.5862236246426	3456.905312108583
ACSM5_1	1570.003310045274	1545.6834359097013	1830.9905056265886	1532.6556276780973
ACSM5_2	574.275696842437	631.0058363435122	228.3524605536577	639.6036260289009
ACSM5_3	1264.3557490812002	962.424331989808	1351.3460679339742	1866.598337186384
ACSM5_4	1529.1870208482082	1473.5952320544336	1453.5311872684877	1275.9439682515317
ACSM6_1	1177.977090547875	1271.3737770838125	1192.854862435545	808.2066226861791
ACSM6_2	961.5558362006424	1080.386847389337	1518.1789158270574	945.264542549515
ACSM6_3	1536.780749070918	1304.1411424725707	887.3422097313365	1057.3039532314483
ACSM6_4	977.692508673901	1129.0697902526347	1278.3566969807503	1232.4335175012664
ACSS1_1	1321.3087107515244	1350.9516644565106	1338.833604341993	1387.983378933465
ACSS1_2	1641.1945121331794	1530.7040688748407	1808.0509890412895	1948.1804323431315
ACSS1_3	1364.0234320042678	1202.0942045475813	1476.4707038537867	882.1743889616303
ACSS1_4	29.425696863000905	5.617262638072809	15.640579489976554	0.0
ACSS2_1	1139.0592334064866	1335.97229742165	1494.1966939424267	919.1582720993557
ACSS2_2	769.8141985772172	771.4374022953325	427.5091727260258	813.6454290299623
ACSS2_3	1329.8516550020731	1661.7735304298728	2328.360933407843	1147.5881385382488
ACSS2_4	527.7641114783388	461.55174676164916	521.3526496658851	1021.4078313624793
ACSS3_1	1182.7231706870687	878.1653924187159	484.85796418927316	484.05376459670214
ACSS3_2	776.4587107720884	614.1540484292939	1006.2106138551583	1009.4424574061563
ACSS3_3	1505.4566201522398	1176.8165226762535	1060.4312894204104	1010.530218674913
ACSS3_4	797.3414633845406	1133.7508424510288	842.5058818600704	460.1230166840562
ACTA1_1	1057.426655012355	937.1466501184804	1151.1466504622745	1900.3189365178396
ACTA1_2	1305.172038278266	1356.5689270945834	1203.281915428863	1483.7063705840487
ACTA1_3	603.7013937054379	438.14648576967915	567.2316828364831	521.0376477344277
ACTA1_4	681.5371079882144	734.9251951478592	743.4488784235522	727.7122887981882
ACTA2_1	1365.9218640599452	1850.8880392449908	1802.8374625446309	2104.818055044087
ACTA2_2	888.4662020570595	633.8144676625486	907.1536104186401	960.4932003121079
ACTA2_3	601.8029616497604	807.9496094428058	764.3029844101876	903.9296143367629
ACTA2_4	1092.5476480423883	1016.7245374911785	1052.0896470257562	742.9409465607811
ACTB_1	1424.773257785947	1064.4712699147974	162.66202669575617	324.1528580894769
ACTB_2	1076.4109755691297	1127.197369373277	787.2425009954866	913.7194657555726
ACTB_3	573.3264808145982	706.8388819574952	152.23497370243845	234.95643405143295
ACTB_4	1436.1638501200118	1249.8409369712	1080.242690107714	477.52719698416234
ACTBL2_1	1056.4774389845163	1086.0041100274098	631.8794113950528	590.6543689348523
ACTBL2_2	565.7327525918884	713.3923550352469	473.3882058966237	854.9803572427144
ACTBL2_3	1142.8560975178416	953.06222759302	992.6554449638453	728.8000500669448
ACTBL2_4	1218.7933797449407	1231.116728177624	1327.3638460493435	1457.6001001338896
ACTC1_1	1839.5806619514758	1723.5634194486738	2259.5423836519462	2051.517752875012
ACTC1_2	632.1778745406001	860.3773940648186	574.5306199318054	418.7880884713041
ACTC1_3	1239.6761323573928	763.9477187779021	751.7905208182063	769.0472170109402
ACTC1_4	450.87761322340094	611.3454171102575	476.516321794619	191.4459833011676
ACTG1_1	878.0248257508334	965.2329633088444	1140.7195974689566	1030.1099215125325
ACTG1_2	907.4505226138343	611.3454171102575	853.9756401527198	1455.4245775963764
ACTG1_3	1560.5111497668865	1472.659021614755	1107.35302789034	1244.3988914575893
ACTG1_4	1143.8053135456803	1099.111056182913	1490.0258727450996	1263.9785942952087
ACTG2_1	1447.5544424540767	1358.441347973941	688.1854975589683	1068.1815659190147
ACTG2_2	1160.8912020467776	1188.987258392078	1080.242690107714	1030.1099215125325
ACTG2_3	1029.8993902050315	1167.4544182794655	1637.0473199508792	1674.0645926164598
ACTG2_4	1694.3506096921487	2137.368433786704	1366.986647423951	1599.009065072252
ACTL10_1	1781.6784842533127	1121.5801067352043	1088.5843325023682	843.0149832863914
ACTL10_2	1381.109320505365	1355.6327166549047	1206.4100313268582	1605.5356326847918
ACTL10_3	1623.1594076042434	1641.1769007569392	2208.4498239846894	2329.98463767671
ACTL10_4	1098.2429442094208	1127.197369373277	1299.2108029673857	1233.521278770023
ACTL6A_1	1551.968205516338	1528.831647995483	1093.797858999027	638.5158647601442
ACTL6A_2	1321.3087107515244	1386.527661164305	96.97159283785463	379.6286827960653
ACTL6A_3	1022.3056619823217	1282.608302359958	399.356129644068	370.9265926460122
ACTL6A_4	758.4236062431523	836.9721330728486	140.765215409789	414.43704339627755
ACTL6B_1	658.7559233200848	949.3173858343048	1128.2071338769754	832.137370598825
ACTL6B_2	900.8060104189632	1042.0022193625061	1154.2747663602697	1633.8174256724644
ACTL6B_3	1102.9890243486145	1223.6270446601936	1728.8053862920751	1346.6484507207128
ACTL6B_4	1177.0278745200362	1489.5108095289734	1070.858342413728	1519.6024924530177
ACTL7A_1	1436.1638501200118	1445.5089188640695	975.972160174537	985.5117094935105
ACTL7A_2	654.009843180891	619.7713110673667	1018.7230774471395	1062.7427595752315
ACTL7A_3	1183.6723867149074	1173.0716809175383	1165.7445246529192	921.333794636869
ACTL7A_4	966.3019163398361	921.2310726439407	1215.7943790208442	871.2967762740639
ACTL7B_1	1178.9263065757136	939.019070997838	1190.7694518368817	1139.9738096569524
ACTL7B_2	1944.9436410415758	2029.7042332236417	1603.6807503722625	2139.626415644299
ACTL7B_3	1593.7337107412425	1452.0623919418213	1119.8654914823212	1151.9391836132754
ACTL7B_4	836.2593205259288	826.6738182363817	1020.8084880458031	1916.6353555491892
ACTL8_1	1122.922560933228	993.3192764992085	2454.5282746269872	1096.463358906687
ACTL8_2	998.5752612863532	906.25170560908	1404.5240381998944	1062.7427595752315
ACTL8_3	1355.480487753719	1538.1937523922709	1052.0896470257562	1753.4711652356941
ACTL8_4	1092.5476480423883	898.7620220916496	1326.3211407500119	1298.786954895421
ACTL9_1	1620.3117595207273	2084.0044387250123	865.4453984453693	1342.2974056456865
ACTL9_2	1833.8853657844434	1893.9537194702157	766.3883950088511	1507.6371184966947
ACTL9_3	1700.0459058591812	1486.7021782099368	631.8794113950528	1278.119490789045
ACTL9_4	528.7133275061775	581.3866830405358	780.986269199496	503.6334674343216
ACTN1_1	1210.250435494392	1037.3211671641122	1059.3885841210786	922.4215559056256
ACTN1_2	1328.9024389742344	1025.1504314482877	842.5058818600704	1323.8054640768237
ACTN1_3	596.107665482728	699.3491984400648	639.1783484903751	677.675270435383
ACTN1_4	888.4662020570595	759.2666665795081	1009.3387297531536	926.7726009806522
ACTN2_1	1182.7231706870687	1145.9215781668531	802.8830804854631	1021.4078313624793
ACTN2_2	1215.9457316614244	1220.8184133411573	1109.4384384890036	1209.590530857377
ACTN2_3	661.603571403601	731.180353389144	751.7905208182063	964.8442453871344
ACTN2_4	991.9307490914821	1053.2367446386518	747.6196996208793	527.5642153469676
ACTN3_1	1220.691811800618	1076.6420056306217	934.2639482012662	1746.9445976231543
ACTN3_2	899.8567943911244	950.2535962739836	745.5342890222157	845.1905058239047
ACTN3_3	909.3489546695118	873.4843402203219	722.5947724369167	630.9015358788478
ACTN3_4	518.2719511999514	392.27217422541787	134.50898361379836	332.85494823953
ACTN4_1	1092.5476480423883	1135.6232633303864	979.1002760725322	1019.2323088249661
ACTN4_2	536.3070557288875	601.9833127134694	549.5056927478429	883.2621502303869
ACTN4_3	386.3309233303667	425.9757500538547	259.6336195336108	400.2961469024413
ACTN4_4	668.2480835984721	512.1071105043045	734.0645307295663	437.2800300401669
ACTR10_1	1273.8479093595874	1148.7302094858896	709.0396035456038	448.1576427277332
ACTR10_2	1132.4147212116154	1109.40937101938	820.6090705741032	772.3105008172101
ACTR10_3	1370.667944199139	1337.8447183010076	444.1924575153341	643.9546711039274
ACTR10_4	870.4310975281235	1211.4563089443693	794.5414380908089	425.3146560838439
ACTR1A_1	924.5364111149316	753.6494039414353	269.0179672275967	159.90090650722522
ACTR1A_2	574.275696842437	1042.0022193625061	911.3244316159672	497.1068998217818
ACTR1A_3	1343.1406793918154	999.8727495769601	849.8048189553928	381.8042053335785
ACTR1A_4	536.3070557288875	813.5668720808786	328.45216928950765	397.0328630961714
ACTR1B_1	838.1577525816064	901.570653410686	451.4913946106565	581.9522787847992
ACTR1B_2	1371.6171602269776	1323.8015617058254	745.5342890222157	676.5875091666263
ACTR1B_3	828.665592303219	899.6982325313284	774.7300374035053	788.6269198485596
ACTR1B_4	106.31219511793874	102.98314836466817	1.0427052993317703	94.63523038182716
ACTR2_1	587.5647212321793	600.1108918341118	68.81854975589684	60.914631050371504
ACTR2_2	945.4191637273839	626.3247841451182	609.9826001090856	218.64001502008344
ACTR2_3	1696.2490417478264	1815.3120425371962	593.2993153197773	343.73256092709636
ACTR2_4	910.2981706973505	935.2742292391227	234.6086923496483	398.12062436492806
ACTR3_1	752.7283100761199	601.9833127134694	132.42357301513482	166.427474119765
ACTR3_2	582.8186410929857	639.4317303006214	223.13893405699883	355.69793488341935
ACTR3_3	1532.9838849595633	1420.231236992742	603.726368313095	402.4716694399546
ACTR3_4	1211.1996515222306	1115.9628440971314	481.72984829127785	622.1994457287947
ACTR3B_1	1382.0585365332038	1346.2706122581167	1604.7234556715944	1285.7338196703415
ACTR3B_2	1486.472299595465	1711.3926837328493	1239.7766009054749	1119.3063455505765
ACTR3B_3	409.1121079984964	535.5123714962745	674.6303286676554	695.0794507354891
ACTR3B_4	1113.4304006548407	1261.0754622473457	1050.0042364270926	1662.0992186601368
ACTR3C_1	1076.4109755691297	1218.9459924617997	2144.8448007254515	1293.348148551638
ACTR3C_2	485.9986062534343	616.0264693086515	414.9967091340446	417.70032720254744
ACTR3C_3	1439.011498203528	1995.0644469555261	2268.9267313459322	1751.2956426981807
ACTR3C_4	568.5804006754046	581.3866830405358	598.5128418164361	378.5409215273086
ACTR5_1	1364.0234320042678	1350.9516644565106	2682.880735180645	1488.0574156590753
ACTR5_2	492.6431184483055	670.3266748100219	187.68695387971866	233.86867278267633
ACTR5_3	933.0793553654803	781.7357171317993	144.93603660711605	462.29853922156946
ACTR5_4	559.0882403970172	882.8464446171099	245.035745342966	97.89851418809707
ACTR6_1	902.7044424746406	1186.1786270730415	2239.7309829646424	1814.3857962860657
ACTR6_2	1137.1608013508092	1010.1710644134268	1119.8654914823212	886.5254340366567
ACTR6_3	1536.780749070918	1857.4415123227423	609.9826001090856	416.61256593379085
ACTR6_4	820.1226480526703	557.9814220485657	176.21719558706917	479.7027195216756
ACTR8_1	1355.480487753719	1570.961117781029	721.552067137585	781.0125909672632
ACTR8_2	610.345905900309	496.19153302976486	499.45583837991796	441.6310751151934
ACTR8_3	698.6229964893117	868.8032880219279	319.0678215955217	478.614958252919
ACTR8_4	1061.22351912371	983.0209616627417	473.3882058966237	514.5110801218879
ACTRT1_1	1783.5769163089903	1674.880476585376	2096.88035695619	2234.2616460261265
ACTRT1_2	1259.6096689420065	1498.8729139257614	1516.093505228394	1525.041298796801
ACTRT1_3	448.9791811677235	480.2759555552252	714.2531300422626	986.5994707622671
ACTRT1_4	1126.719425044583	794.8426632873026	947.8191170925792	691.8161669292192
ACTRT2_1	2082.579965078193	1783.480887588117	2381.5389036737633	2371.3195658894624
ACTRT2_2	1022.3056619823217	884.7188654964675	1239.7766009054749	1389.0711402022216
ACTRT2_3	1008.0674215647406	841.6531852712426	1822.6488632319345	1096.463358906687
ACTRT2_4	1245.3714285244253	1247.9685160918425	1051.0469417264244	1035.5487278563155
ACTRT3_1	1190.3168989097785	1232.052938617303	893.598441527327	1094.2878363691739
ACTRT3_2	1835.7837978401208	2069.96128212983	1857.0581381098827	1256.3642654139123
ACTRT3_3	1156.1451219075839	1485.7659677702582	1988.4390058256859	1641.4317545537608
ACTRT3_4	1127.6686410724217	1096.3024248638767	1087.5416272030363	930.0358847869221
ACVR1_1	1339.3438152804604	1187.1148375127204	763.2602791108558	1064.9182821127447
ACVR1_2	1221.6410278284568	1656.1562677918	1313.8086771580306	1581.6048847721459
ACVR1_3	467.96350172449826	512.1071105043045	309.68347390153576	535.178544228264
ACVR1_4	1559.5619337390478	1390.2725029230203	1266.8869386881008	1544.6210016344203
ACVR1B_1	734.6932055471839	596.3660500753966	401.44154024273155	502.5457061655649
ACVR1B_2	1436.1638501200118	1485.7659677702582	1156.3601769589332	1709.9607144854288
ACVR1B_3	1420.0271776467532	1079.4506369496582	1598.4672238756038	1309.6645675829873
ACVR1B_4	1183.6723867149074	1115.9628440971314	1037.4917728351113	618.9361619225248
ACVR1C_1	207.8783100966838	275.24586926556765	261.7190301322743	258.8871819640789
ACVR1C_2	789.7477351618307	911.8689682471527	810.1820175807854	1268.3296393702353
ACVR1C_3	1186.5200347984235	688.1146731639192	1217.8797896195076	1129.096196969386
ACVR1C_4	1366.8710800877839	1770.3739414326137	1061.4739947197422	1109.5164941317666
ACVR2A_1	547.6976480629523	366.9944923540902	389.97178195008206	251.27285308278246
ACVR2A_2	1665.8741288569865	1130.0060006923136	1676.6701213254867	971.3708129996742
ACVR2A_3	1558.6127177112091	1749.77731175968	1967.5848998390504	2198.3655241571573
ACVR2A_4	1230.1839720790056	1152.4750512446046	672.5449180689918	598.2686978161487
ACVR2B_1	1892.7367595104452	1796.5878337436202	1529.648674119707	1323.8054640768237
ACVR2B_2	1359.277351865074	1703.9030002154188	1031.2355410391208	1224.81918861997
ACVR2B_3	406.2644599149802	408.18775169995746	315.9397056975264	431.84122369638374
ACVR2B_4	1272.8986933317487	1454.8710232608576	1527.5632635210434	1147.5881385382488
ACVRL1_1	1210.250435494392	1185.2424166333628	1186.5986306395546	1048.6018630813953
ACVRL1_2	1343.1406793918154	1575.642169979423	1038.5344781344431	1228.0824724262397
ACVRL1_3	720.4549651296028	785.4805588905145	437.9362257193435	806.0311001486658
ACVRL1_4	913.1458187808668	1171.1992600381807	1031.2355410391208	1342.2974056456865
ACY1_1	1606.073519103146	1518.5333331590161	1896.6809394844902	2135.2753705692726
ACY1_2	2413.856358793913	2209.4566376419716	1398.267806403904	1725.1893722480215
ACY1_3	1304.222822250427	1042.938429802185	674.6303286676554	1080.1469398753377
ACY1_4	1433.3162020364957	1123.4525276145619	1064.6021106177375	957.229916505838
ACY3_1	1214.9965156335857	1144.9853677271744	523.4380602645487	1164.992318838355
ACY3_2	866.6342334167686	770.5011918556537	947.8191170925792	920.2460333681124
ACY3_3	1313.7149825288145	1251.7133578505577	914.4525475139625	787.539158579803
ACY3_4	1004.2705574533857	1338.7809287406862	691.3136134569637	833.2251318675817
ACYP1_1	1607.0227351309848	1562.5352238239198	3026.973483960129	2586.696297103276
ACYP1_2	944.4699476995452	952.1260171533412	1231.4349585108207	803.8555776111525
ACYP1_3	1234.9300522181993	1271.3737770838125	1625.5775616582298	1801.3326610609859
ACYP1_4	824.8687281918641	992.3830660595297	984.3138025691911	989.862754568537
ACYP2_1	1084.9539198196785	960.5519111104504	1227.2641373134936	1226.9947111574832
ACYP2_2	1832.9361497566047	1637.432058998224	2158.3999696167643	1114.9553004755498
ACYP2_3	178.4526132336829	154.47472254700227	218.96811285967175	121.82926210074301
ACYP2_4	789.7477351618307	506.4898478662316	471.30279529796013	283.90569114548146
ADA_1	1061.22351912371	1056.045375957688	997.8689714605041	650.4812387164671
ADA_2	486.94782228127303	485.893218193298	294.0428944115592	822.3475191800153
ADA_3	615.0919860395028	385.71870114766625	941.5628852965885	990.9505158372936
ADA_4	1713.3349302489235	1565.3438551429563	2489.9802548042676	1839.4043054674682
ADAD1_1	1106.7858884599696	996.1279078182449	1716.2929227000939	931.1236460556787
ADAD1_2	1557.6635016833704	1174.0078913572172	2071.8554297722276	2029.762527499879
ADAD1_3	1204.5551393273595	1305.0773529122494	1534.8622006163657	1509.8126410342081
ADAD1_4	963.4542682563199	1007.3624330943904	1379.499111015932	945.264542549515
ADAD2_1	1427.6209058694633	1230.1805177379454	1604.7234556715944	1557.6741368594999
ADAD2_2	1233.0316201625217	1008.2986435340692	1078.1572795090503	996.3893221810767
ADAD2_3	1202.656707271682	1020.4693792498937	775.772742702837	1221.5559048137
ADAD2_4	583.7678571208244	484.0207973139404	1144.8904186662837	565.6358597534497
ADAL_1	831.5132403867352	939.9552814375168	810.1820175807854	819.0842353737454
ADAL_2	1427.6209058694633	1629.9423754807935	2203.2362974880307	1704.5219081416456
ADAL_3	963.4542682563199	780.7995066921205	906.1109051193083	624.374968266308
ADAL_4	1481.7262194562713	1156.2198930033198	1967.5848998390504	2120.04671280668
ADAM10_1	1268.152613192555	1173.0716809175383	901.9400839219812	1542.445479096907
ADAM10_2	822.9702961361866	946.5087545152684	538.0359344551935	717.9224373793785
ADAM10_3	432.8425086944649	449.3810110458248	722.5947724369167	221.90329882635334
ADAM10_4	298.053832741364	304.26839289561053	154.320384301102	353.52241234590605
ADAM11_1	1065.9695992629038	1115.9628440971314	615.1961266057444	606.9707879662018
ADAM11_2	704.3182926563442	717.1371967939621	825.8225970707621	608.0585492349584
ADAM11_3	785.001655022637	614.1540484292939	453.57680520932007	553.6704857971267
ADAM11_4	1313.7149825288145	1144.0491572874955	809.1393122814537	555.84600833464
ADAM12_1	918.8411149478992	901.570653410686	713.2104247429309	1068.1815659190147
ADAM12_2	1427.6209058694633	1110.3455814590586	767.4311003081829	740.7654240232678
ADAM12_3	1061.22351912371	1159.0285243223564	1181.3851041428957	1804.5959448672559
ADAM12_4	1344.089895419654	1459.5520754592517	1819.5207473339392	2010.1828246622597
ADAM15_1	513.5258710607577	793.9064528476238	619.3669478030715	606.9707879662018
ADAM15_2	1181.7739546592297	1368.739662810408	1226.2214320141618	1179.1332153321912
ADAM15_3	1560.5111497668865	1695.4771062583097	2271.0121419445954	2716.1398880853153
ADAM15_4	1006.1689895090632	1086.9403204670887	1320.0649089540211	1284.6460584015847
ADAM17_1	1716.1825783324398	1517.5971227193374	1225.17872671483	1616.4132453723582
ADAM17_2	1514.9487804306273	1482.021126011543	1837.2467374225791	1782.8407194921233
ADAM17_3	1285.2385016936523	1178.688943555611	1672.4993001281596	1154.1147061507886
ADAM17_4	767.9157665215397	747.0959308636836	1323.1930248520164	739.6776627545112
ADAM18_1	965.3527003119974	926.8483352820135	960.3315806845604	628.7260133413345
ADAM18_2	1486.472299595465	1775.0549936310078	1214.7516737215124	1755.6466877732073
ADAM18_3	1350.7344076145253	1461.4244963386093	1015.5949615491443	1726.2771335167781
ADAM18_4	1418.1287455910758	1466.1055485370032	1631.8337934542205	1947.092671074375
ADAM19_1	633.1270905684388	1066.343690794155	820.6090705741032	809.2943839549357
ADAM19_2	1169.4341462973262	893.1447594535767	2409.691946755721	1529.3923438718275
ADAM19_3	913.1458187808668	789.2254006492298	860.2318719487105	905.0173756055195
ADAM19_4	926.434843170609	811.694451201521	1311.723266559367	695.0794507354891
ADAM2_1	1267.2033971647163	1363.1224001723351	1351.3460679339742	1732.803701129318
ADAM2_2	696.7245644336343	461.55174676164916	1082.3281007063774	1107.3409715942535
ADAM2_3	2140.482142776356	1992.2558156364898	2194.8946550933765	2931.5166192991287
ADAM2_4	840.0561846372839	670.3266748100219	1165.7445246529192	1463.0389064776728
ADAM20_1	851.4467769713488	667.5180434909855	638.1356431910434	953.9666326995681
ADAM20_2	1724.7255225829883	1540.0661732716285	1517.1362105277258	1537.006672753124
ADAM20_3	642.6192508468262	741.4786682256108	695.4844346542908	785.3636360422897
ADAM20_4	1164.6880661581326	1298.5238798344978	1411.822975295217	1630.5541418661944
ADAM21_1	1329.8516550020731	1325.673982585183	2297.07977442789	1988.4275992871271
ADAM21_2	978.6417247017397	774.2460336143689	699.6552558516179	840.8394607488781
ADAM21_3	825.8179442197028	841.6531852712426	1166.787229952251	962.6687228496211
ADAM21_4	1353.5820556980416	1030.7676940863605	1484.812346248441	1337.9463605706599
ADAM22_1	1136.2115853229704	1104.7283188209858	853.9756401527198	1360.7893472145493
ADAM22_2	489.79547036478925	553.3003698501717	675.6730339669871	481.8782420591889
ADAM22_3	1520.6440765976595	1593.4301683333204	1543.20384301102	2153.7673121381354
ADAM22_4	1023.2548780101605	900.6344429710072	807.0539016827902	645.042432372684
ADAM23_1	1446.605226426238	1120.6438962955256	1022.8938986444666	2262.543439013799
ADAM23_2	722.3533971852802	765.8201396572597	1129.2498391763072	599.3564590849054
ADAM23_3	1427.6209058694633	1334.0998765422923	1532.7767900177023	1089.9367912941473
ADAM23_4	892.2630661684145	928.7207561613711	1225.17872671483	1093.2000751004173
ADAM28_1	1126.719425044583	1219.8822029014784	1266.8869386881008	2633.470031659811
ADAM28_2	1166.58649821381	909.0603369281164	1079.1999848083822	1330.3320316893635
ADAM28_3	1086.852351875356	988.6382243008145	1749.6594922787106	1169.3433639133816
ADAM28_4	732.7947734915064	612.2816275499363	590.1711994217819	822.3475191800153
ADAM29_1	1619.3625434928883	1647.7303738346907	1256.4598856947832	1577.2538396971192
ADAM29_2	1166.58649821381	930.5931770407287	740.3207625255569	928.9481235181655
ADAM29_3	1107.7351044878083	1260.1392518076668	1149.0612398636108	1629.4663805974378
ADAM29_4	1067.8680313185812	1069.1523221131913	643.3491696877022	1369.4914373646022
ADAM30_1	757.4743902153136	902.5068638503648	865.4453984453693	538.4418280345338
ADAM30_2	1659.2296166621154	1769.437730992935	1713.1648068020986	1205.2394857823506
ADAM30_3	1088.7507839310333	1437.0830249069604	1193.897567734877	1701.2586243353755
ADAM30_4	513.5258710607577	441.89132752839436	675.6730339669871	540.6173505720471
ADAM32_1	1460.843466843819	1158.0923138826774	951.9899382899063	2213.59418191975
ADAM32_2	1602.276654991791	1995.0644469555261	2191.766539195381	2016.7093922747995
ADAM32_3	1140.0084494343253	968.9778050675596	1203.281915428863	1074.7081335315545
ADAM32_4	645.4668989303424	753.6494039414353	263.80444073093787	775.57378462348
ADAM33_1	178.4526132336829	285.5441841020345	95.92888753852286	98.9862754568537
ADAM33_2	845.7514808043163	1199.2855732285448	763.2602791108558	601.5319816224186
ADAM33_3	718.5565330739253	612.2816275499363	109.48405642983587	574.3379499035028
ADAM33_4	450.87761322340094	494.31911215040725	294.0428944115592	386.15525040860507
ADAM7_1	1232.082404134683	890.3361281345403	1807.008283741958	1920.9864006242158
ADAM7_2	2346.4620208173624	2053.109494215612	1884.168475892509	2443.1118096274
ADAM7_3	1210.250435494392	1327.5464034645406	2822.603245291102	2882.5673622050804
ADAM7_4	1338.3945992526217	1269.5013562044549	1198.068388932204	1597.9213038034954
ADAM8_1	1360.2265678929127	1239.5426221347334	1827.8623897285931	977.897380612214
ADAM8_2	485.9986062534343	528.022687978844	942.6055905959203	795.1534874610995
ADAM8_3	1327.0040069185568	1318.1842990677526	1721.5064491967528	1352.087257064496
ADAM8_4	1126.719425044583	1318.1842990677526	506.75477547524036	749.4675141733209
ADAM9_1	987.1846689522883	662.8369912925915	1638.090025250211	989.862754568537
ADAM9_2	1368.7695121434613	1105.6645292606647	757.0040473148651	1266.154116832722
ADAM9_3	1268.152613192555	1061.6626385957609	955.1180541879015	2029.762527499879
ADAM9_4	660.6543553757622	820.1203451586301	763.2602791108558	759.2573655921306
ADAMDEC1_1	292.35853657433154	204.09387584997873	180.38801678439626	92.4597078443139
ADAMDEC1_2	1144.754529573519	1252.6495682902364	1786.1541777553225	1327.0687478830935
ADAMDEC1_3	1435.2146340921731	1635.5596381188664	1260.6307068921103	2577.9942069532226
ADAMDEC1_4	1602.276654991791	1627.1337441617572	2205.321708086694	1632.7296644037076
ADAMTS1_1	1357.3789198093966	1523.2143853574103	1527.5632635210434	1780.6651969546099
ADAMTS1_2	1001.4229093698694	703.09404019878	647.5199908850293	813.6454290299623
ADAMTS1_3	807.7828396907668	957.743279791414	1022.8938986444666	1151.9391836132754
ADAMTS1_4	2174.6539197785505	2181.3703244516078	2143.8020954261196	2409.3912102959443
ADAMTS10_1	1140.957665462164	1317.248088628074	1112.5665543869989	976.8096193434574
ADAMTS10_2	955.8605400336099	909.9965473677952	774.7300374035053	833.2251318675817
ADAMTS10_3	1399.144425034301	1334.0998765422923	911.3244316159672	922.4215559056256
ADAMTS10_4	212.62439023587748	236.8612412387368	200.1994174716999	179.48060934484462
ADAMTS12_1	1724.7255225829883	1885.5278255131063	2025.9763966016296	2204.8920917696973
ADAMTS12_2	1416.2303135353984	1669.2632139473033	1433.719786581184	1013.7935024811829
ADAMTS12_3	1574.7493901844678	1730.1168925264253	2726.674357752579	1816.5613188235789
ADAMTS12_4	615.0919860395028	694.6681462416708	555.7619245438335	693.9916894667325
ADAMTS13_1	853.3452090270262	983.9571721024205	583.9149676257913	1109.5164941317666
ADAMTS13_2	863.7865853332523	822.9289764776665	915.4952528132943	990.9505158372936
ADAMTS13_3	946.3683797552226	927.7845457216923	750.7478155188746	1097.5511201754437
ADAMTS13_4	917.8918989200604	1015.7883270514997	1023.9366039437983	1077.9714173378243
ADAMTS14_1	1493.1168117903362	1203.966625426939	1087.5416272030363	1153.026944882032
ADAMTS14_2	1186.5200347984235	1005.490012215033	1271.057759885428	541.7051118408037
ADAMTS14_3	1212.1488675500696	1064.4712699147974	861.2745772480422	492.75585474675523
ADAMTS14_4	1520.6440765976595	1350.9516644565106	1853.9300222118875	1069.2693271877713
ADAMTS15_1	171.8081010388117	142.30398683117784	175.1744902877374	39.15940567523882
ADAMTS15_2	2059.798780410063	2226.3084255561903	2429.5033474430247	1751.2956426981807
ADAMTS15_3	1289.0353658050074	1482.021126011543	2748.5711690385465	1978.6377478683173
ADAMTS15_4	2013.287195045965	2611.0909162641774	3431.543140100856	2899.9715425051863
ADAMTS16_1	1607.9719511588235	1104.7283188209858	1409.7375646965534	1444.54696490881
ADAMTS16_2	483.15095816991806	601.0471022737906	746.5769943215475	869.1212537365506
ADAMTS16_3	422.40113238823875	508.36226874558923	696.5271399536225	911.5439432180593
ADAMTS16_4	752.7283100761199	675.9439374480947	730.9364148315709	1146.5003772694922
ADAMTS17_1	99.66768292306757	23.40526099197004	52.135264966588515	192.53374456992424
ADAMTS17_2	697.673780461473	591.6849978770026	590.1711994217819	903.9296143367629
ADAMTS17_3	1084.0047037918398	1206.7752567459752	1095.8832695976905	1868.7738597238972
ADAMTS17_4	852.3959929991875	832.2910808744546	1077.1145742097187	997.4770834498335
ADAMTS18_1	1363.0742159764288	1229.2443072982664	2352.3431552924735	2018.8849148123127
ADAMTS18_2	2088.2752612452255	2025.0231810252478	2536.901993274197	2386.548223652055
ADAMTS18_3	951.1144598944163	1054.1729550783307	1359.6877103286283	877.8233438866037
ADAMTS18_4	779.3063588556046	888.4637072551827	1201.1965048301993	1168.255602644625
ADAMTS19_1	1098.2429442094208	893.1447594535767	1467.0863561598007	1250.9254590701291
ADAMTS19_2	1217.844163717102	1334.0998765422923	1252.2890644974561	1414.0896493836242
ADAMTS19_3	1350.7344076145253	1647.7303738346907	2233.474751168652	1670.8013088101898
ADAMTS19_4	872.329529583801	731.180353389144	1373.2428792199414	476.4394357154057
ADAMTS2_1	1226.3871079676505	1128.133579812956	1180.3423988435638	878.9111051553602
ADAMTS2_2	1289.0353658050074	1109.40937101938	912.3671369152989	1126.9206744318728
ADAMTS2_3	1416.2303135353984	1190.8596792714357	1081.2853954070458	1373.8424824396288
ADAMTS2_4	651.1621950973748	570.1521577643902	497.3704277812544	1413.0018881148676
ADAMTS20_1	1272.8986933317487	1538.1937523922709	989.5273290658499	1256.3642654139123
ADAMTS20_2	681.5371079882144	879.1016028583947	555.7619245438335	863.6824473927675
ADAMTS20_3	1304.222822250427	1159.0285243223564	2830.9448876857564	1920.9864006242158
ADAMTS20_4	1154.2466898519065	1012.0434852927845	752.8332261175382	804.9433388799092
ADAMTS3_1	1444.7067943705604	1576.578380419102	1256.4598856947832	1694.7320567228358
ADAMTS3_2	1408.6365853126883	1026.0866418879666	1525.47785292238	1405.3875592335712
ADAMTS3_3	1286.187717721491	1392.144923802378	1252.2890644974561	1389.0711402022216
ADAMTS3_4	288.5616724629766	290.2252363004285	449.405984011993	257.7994206953223
ADAMTS4_1	696.7245644336343	625.3885737054394	604.7690736124267	689.640644391706
ADAMTS4_2	746.0837978812488	440.95511708871555	468.1746793999648	425.3146560838439
ADAMTS4_3	750.8298780204424	1137.495684209744	571.4025040338101	315.4507679394239
ADAMTS4_4	1679.163153246729	1658.9648991108363	2107.3074099495075	1701.2586243353755
ADAMTS5_1	1776.932404114119	1395.889765561093	2053.0867343842556	1458.6878614026461
ADAMTS5_2	1496.913675901691	1622.4526919633631	1514.0080946297303	1271.592923176505
ADAMTS5_3	1244.4222124965866	938.0828605581592	1365.943942124619	1876.3881886051938
ADAMTS5_4	918.8411149478992	824.8013973570241	743.4488784235522	965.932006655891
ADAMTS6_1	2423.3485190723004	2664.4549113258695	2101.051178153517	1918.8108780867024
ADAMTS6_2	740.3885017142163	965.2329633088444	726.7655936342438	748.3797529045643
ADAMTS6_3	1094.4460800980657	1297.587669394819	938.4347693985932	971.3708129996742
ADAMTS6_4	814.4273518856379	752.7131935017565	863.3599878467057	498.1946610905384
ADAMTS7_1	1086.852351875356	1234.8615699363393	1259.5880015927785	792.9779649235862
ADAMTS7_2	1186.5200347984235	1290.0979858773885	444.1924575153341	858.2436410489843
ADAMTS7_3	609.3966898724703	801.3961363650542	1062.5167000190738	961.5809615808645
ADAMTS7_4	1014.7119337596118	1226.4356759792302	1041.6625940324384	1486.9696543903187
ADAMTS8_1	863.7865853332523	975.5312781453113	1389.9261640092498	614.5851168474983
ADAMTS8_2	916.9426828922217	779.8632962524417	1371.157468621278	911.5439432180593
ADAMTS8_3	1483.6246515119487	1389.3362924833416	1749.6594922787106	901.7540917992496
ADAMTS8_4	1125.7702090167443	920.2948622042619	1589.0828761816178	1439.1081585650268
ADAMTS9_1	1786.4245643925065	1743.2238386819286	1251.2463591981243	2126.5732804192194
ADAMTS9_2	1100.1413762650982	925.9121248423347	1117.7800808836578	1349.9117345269829
ADAMTS9_3	2013.287195045965	1665.518372188588	1886.2538864911724	2747.6849648792577
ADAMTS9_4	882.770905890027	971.786436386596	286.74395731623684	717.9224373793785
ADAMTSL1_1	753.6775261039586	717.1371967939621	1129.2498391763072	1072.532610994041
ADAMTSL1_2	1453.2497386211091	1653.3476364727635	1333.6200778453342	1461.9511452089162
ADAMTSL1_3	863.7865853332523	1130.0060006923136	1728.8053862920751	1829.6144540486584
ADAMTSL1_4	1299.4767421112335	1057.9177968370457	1702.7377538087808	1700.170863066619
ADAMTSL2_1	1023.2548780101605	1291.9704067567461	619.3669478030715	1357.5260634082792
ADAMTSL2_2	486.94782228127303	437.21027533000034	449.405984011993	873.4722988115772
ADAMTSL2_3	1966.7756096818669	2155.1564321406013	2034.3180389962838	1272.680684445262
ADAMTSL2_4	992.8799651193208	768.6287709762961	720.5093618382532	833.2251318675817
ADAMTSL3_1	1415.2810975075595	1565.3438551429563	1746.531376380715	1101.9021652504703
ADAMTSL3_2	1025.153310065838	1383.7190298452688	1130.292544475639	757.0818430546173
ADAMTSL3_3	560.9866724526946	585.131524799251	523.4380602645487	943.0890200120017
ADAMTSL3_4	1476.030923289239	1767.5653101135774	2051.001323785592	1534.8311502156107
ADAMTSL4_1	799.2398954402181	743.3510891049684	431.67999392335287	1139.9738096569524
ADAMTSL4_2	477.4556620028856	334.22712696533216	430.6372886240211	22.842986643889315
ADAMTSL4_3	972.9464285347073	1158.0923138826774	427.5091727260258	984.4239482247538
ADAMTSL4_4	754.6267421317974	628.1972050244758	876.9151567380188	586.3033238598257
ADAMTSL5_1	1835.7837978401208	1830.291409572057	1336.7481937433295	1640.3439932850042
ADAMTSL5_2	1400.0936410621398	1695.4771062583097	1735.0616180880656	1371.6669599021154
ADAMTSL5_3	883.7201219178659	983.9571721024205	804.9684910841266	723.3612437231616
ADAMTSL5_4	720.4549651296028	871.6119193409643	1007.2533191544901	1270.5051619077485
ADAP1_1	583.7678571208244	354.8237566382658	332.62299048683474	363.3122637647158
ADAP1_2	952.063675922255	758.3304561398293	648.5626961843611	414.43704339627755
ADAP1_3	592.310801371373	440.95511708871555	322.195937493517	485.1415258654588
ADAP1_4	1277.6447734709425	1248.9047265315212	1608.8942768689215	1350.9994957957394
ADAP2_1	1430.4685539529794	1261.0754622473457	1583.869349684959	1020.3200700937227
ADAP2_2	1282.3908536101362	1037.3211671641122	1384.7126375125908	1160.6412737633286
ADAP2_3	1054.579006928839	1156.2198930033198	577.6587358298008	451.4209265340031
ADAP2_4	600.8537456219217	898.7620220916496	697.5698452529543	368.75107010849894
ADAR_1	1981.0138500994478	1949.190135411265	938.4347693985932	1645.7827996287872
ADAR_2	896.0599302797694	1055.1091655180094	486.9433747879367	435.10450750265363
ADAR_3	947.3175957830614	1048.5556924402579	520.3099443665534	807.1188614174224
ADAR_4	902.7044424746406	1016.7245374911785	391.01448724941383	663.5343739415467
ADARB1_1	1227.3363239954892	1276.9910397218853	2467.0407382189683	1105.1654490567403
ADARB1_2	1041.2899825390964	1210.5200985046904	1885.2111811918405	1224.81918861997
ADARB1_3	1023.2548780101605	805.1409781237694	1264.8015280894374	2374.582849695732
ADARB1_4	927.3840591984479	715.2647759146045	949.9045276912427	770.134978279697
ADARB2_1	855.2436410827037	1097.2386353035554	1547.374664208347	1063.830520843988
ADARB2_2	1123.8717769610669	1059.7902177164033	1150.1039451629426	1267.2418781014787
ADARB2_3	694.8261323779568	942.7639127565532	769.5165109068464	1039.899772931342
ADARB2_4	242.99930312671714	290.2252363004285	267.97526192826496	354.6101736146627
ADAT1_1	1589.9368466298874	1423.9760787514572	1741.3178498840564	1826.3511702423884
ADAT1_2	1276.6955574431038	1223.6270446601936	1614.1078033655804	1259.6275492201821
ADAT1_3	1569.0540940174353	1934.210768376404	1622.4494457602345	1656.6604123163536
ADAT1_4	1308.019686361782	1580.3232221778171	1631.8337934542205	1167.1678413758684
ADAT2_1	1210.250435494392	1123.4525276145619	2411.7773573543845	1460.8633839401596
ADAT2_2	1670.6202089961803	1931.4021370573676	1437.8906077785111	511.247796315618
ADAT2_3	785.001655022637	489.63805995201324	532.8224079585347	1198.7129181698108
ADAT2_4	1028.9501741771928	1386.527661164305	436.8935204200117	456.8597328777863
ADAT3_1	1465.5895469830127	1315.3756677487163	528.6515867612076	701.6060183480289
ADAT3_2	629.3302264570839	801.3961363650542	253.37738773762018	95.7229916505838
ADAT3_3	1458.9450347881416	1399.6346073198083	947.8191170925792	685.2895993166794
ADAT3_4	503.0844947545316	554.2365802898505	214.79729166234466	172.9540417323048
ADCK1_1	1177.977090547875	1354.6965062152258	1136.5487762716295	1682.7666827665128
ADCK1_2	1927.8577525404785	2223.4997942371538	1561.972538398992	1842.667589273738
ADCK1_3	94.92160278387388	121.7073571582442	410.8258879367175	121.82926210074301
ADCK1_4	1319.410278695847	1271.3737770838125	1407.65215409789	1968.8478964495075
ADCK2_1	803.036759551573	793.9064528476238	1274.1858757834232	1236.784562576293
ADCK2_2	1461.7926828716577	1186.1786270730415	1261.673412191442	1830.702215317415
ADCK2_3	893.2122821962532	1238.6064116950545	721.552067137585	1235.6968013075364
ADCK2_4	853.3452090270262	672.1990956893795	761.1748685121922	640.6913872976575
ADCK3_1	672.044947709827	572.9607890834266	1420.1646176898712	689.640644391706
ADCK3_2	1270.0510452482326	994.2554869388873	666.2886862730012	808.2066226861791
ADCK3_3	548.646864090791	407.2515412602787	697.5698452529543	526.4764540782108
ADCK3_4	870.4310975281235	799.5237154856966	584.9576729251231	1049.689624350152
ADCK4_1	1477.9293553449163	1499.80912436544	2183.424896800727	2459.4282286587495
ADCK4_2	1320.3594947236857	1426.7847100704937	1275.228581082755	1417.3529331898942
ADCK4_3	928.3332752262866	1120.6438962955256	565.1462722378195	875.6478213490903
ADCK4_4	745.1345818534099	786.4167693301933	625.6231795990622	945.264542549515
ADCK5_1	1283.340069637975	1139.3681050891016	627.7085901977257	938.7379749369752
ADCK5_2	1081.1570557083235	1418.3588161133844	2096.88035695619	1285.7338196703415
ADCK5_3	1867.1079267587993	1891.1450881511792	2207.4071186853575	1705.6096694104021
ADCK5_4	1394.3983448951074	1324.7377721455043	1740.2751445847246	1285.7338196703415
ADCY1_1	822.0210801083479	753.6494039414353	502.5839542779133	876.7355826178471
ADCY1_2	1562.4095818225642	1400.5708177594872	1442.0614289758382	1716.4872820979685
ADCY1_3	1027.0517421215154	850.0790792283518	1602.638045072931	1204.151724513594
ADCY1_4	783.1032229669595	505.5536374265528	869.6162196426964	466.649584296596
ADCY10_1	1918.3655922620912	2202.9031645642203	1402.438627601231	1540.269956559394
ADCY10_2	823.9195121640253	941.8277023168744	1150.1039451629426	896.3152854554664
ADCY10_3	1139.0592334064866	967.105384188202	1267.9296439874327	1009.4424574061563
ADCY10_4	1058.3758710401937	1228.3080968585878	738.2353519268934	836.4884156738516
ADCY2_1	1169.4341462973262	1461.4244963386093	1840.3748533205744	1776.3141518795833
ADCY2_2	1414.3318814797208	1508.2350183225494	1979.0546581316999	1717.5750433667251
ADCY2_3	1613.667247325856	1378.101767207196	2076.0262509695544	2013.4461084685297
ADCY2_4	1071.6648954299362	1040.1297984831485	1295.0399817700586	1215.0293372011602
ADCY3_1	1540.5776131822731	1502.6177556844766	907.1536104186401	1255.2765041451557
ADCY3_2	1002.3721253977081	777.0546649334053	613.1107160070809	511.247796315618
ADCY3_3	479.3540940585631	407.2515412602787	496.32772248192265	145.76001001338895
ADCY3_4	448.0299651398847	470.9138511584372	690.2709081576319	252.36061435153908
ADCY4_1	1050.7821428174839	1014.8521166118209	1157.402882258265	303.4853939831009
ADCY4_2	632.1778745406001	1093.4937935448402	518.2245337678899	562.3725759471798
ADCY4_3	854.294425054865	786.4167693301933	923.8368952079485	781.0125909672632
ADCY4_4	659.7051393479235	642.2403616196578	553.67651394517	460.1230166840562
ADCY5_1	1749.4051393067957	1873.357089797282	1386.7980481112545	1565.2884657407965
ADCY5_2	854.294425054865	1020.4693792498937	966.5878124805511	734.238856410728
ADCY5_3	635.0255226241163	788.289190209551	694.441729354959	680.9385542416529
ADCY5_4	1702.8935539426975	1616.8354293252903	2251.200741257292	1669.7135475414332
ADCY6_1	1145.7037456013577	996.1279078182449	1024.97930924313	1237.8723238450496
ADCY6_2	1073.5633274856136	829.4824495554182	1339.8763096413247	839.7516994801215
ADCY6_3	420.5027003325613	307.07702421464694	164.7474372944197	176.21732553857473
ADCY6_4	930.2317072819641	1168.3906287191444	1415.993796492544	753.8185592483474
ADCY7_1	1235.879268246038	946.5087545152684	1720.463743897421	753.8185592483474
ADCY7_2	1147.6021776570353	1224.5632550998725	826.8653023700938	765.7839332046703
ADCY7_3	1371.6171602269776	1221.754623780836	1655.8160153388512	858.2436410489843
ADCY7_4	802.0875435237343	902.5068638503648	626.6658848983939	354.6101736146627
ADCY8_1	23.73040069596847	0.0	0.0	1.087761268756634
ADCY8_2	1328.9024389742344	1366.8672419310503	1271.057759885428	1283.558297132828
ADCY8_3	962.5050522284812	949.3173858343048	547.4202821491793	1119.3063455505765
ADCY8_4	1572.8509581287901	1618.707850204648	918.6233687112896	1247.6621752638594
ADCY9_1	1000.4736933420307	755.5218248207929	988.4846237665182	951.7911101620548
ADCY9_2	1848.1236062020246	1630.8785859204722	1460.8301243638102	1367.315914827089
ADCY9_3	1198.859843160327	1137.495684209744	1795.5385254493083	1937.3028196555651
ADCY9_4	369.2450348292694	646.9214138180519	318.02511629618994	522.1254090031844
ADCYAP1_1	1289.0353658050074	1407.1242908372387	1437.8906077785111	884.3499114991434
ADCYAP1_2	1040.3407665112577	992.3830660595297	1883.125770593177	2011.2705859310163
ADCYAP1_3	2223.063937198326	2212.265268961008	1981.1400687303635	2448.550615971183
ADCYAP1_4	270.52656793404054	344.525441801799	333.66569578616645	386.15525040860507
ADCYAP1R1_1	1827.2408535895722	1700.1581584567036	704.8687823482767	1348.8239732582263
ADCYAP1R1_2	1228.285540023328	1282.608302359958	995.7835608618406	2084.1505909377106
ADCYAP1R1_3	1109.6335365434857	883.7826550567887	813.3101334787808	1084.497984950364
ADCYAP1R1_4	1120.0749128497118	1348.1430331374743	1190.7694518368817	1470.6532353589691
ADD1_1	1060.2743030958713	988.6382243008145	1013.5095509504807	576.513472441016
ADD1_2	1263.4065330533613	1306.0135633519283	1528.6059688203752	1151.9391836132754
ADD1_3	980.5401567574172	1005.490012215033	1705.865869706776	494.9313772842685
ADD1_4	1105.8366724321306	1042.0022193625061	1282.5275181780773	2451.813899777453
ADD2_1	682.4863240160532	649.7300451370883	914.4525475139625	1183.4842604072178
ADD2_2	1499.7613239852074	1614.9630084459327	1868.5278964025324	1578.341600965876
ADD2_3	1041.2899825390964	1250.7771474108788	474.43091119595545	1215.0293372011602
ADD2_4	939.7238675603514	459.67932588229155	454.61951050865184	253.44837562029574
ADD3_1	1408.6365853126883	1246.096095212485	1225.17872671483	444.8943589214633
ADD3_2	1075.461759541291	888.4637072551827	1169.9153458502462	1543.5332403656637
ADD3_3	2017.08405915732	1555.0455403064893	1775.7271247620047	2513.816292096581
ADD3_4	765.0681184380235	754.585614381114	910.2817263166354	903.9296143367629
ADGB_1	823.9195121640253	619.7713110673667	1283.5702234774092	1838.3165441987114
ADGB_2	1925.959320484801	1714.2013150518858	1056.2604682230833	1941.6538647305917
ADGB_3	1174.18022643652	1002.6813808959965	712.167719443599	1020.3200700937227
ADGB_4	1770.2878919192478	1551.3006985477741	1832.0332109259202	2220.12074953229
ADGRA1_1	690.0800522387631	817.3117138395937	596.4274312177726	391.59405675238827
ADGRA1_2	1495.9644598738523	1516.6609122796585	2081.2397774662136	1352.087257064496
ADGRA1_3	1385.8554006445586	1594.366378772999	1865.399780504537	1900.3189365178396
ADGRA1_4	1029.8993902050315	1358.441347973941	1132.3779550743025	777.7493071609933
ADGRA2_1	944.4699476995452	829.4824495554182	859.1891666493786	1110.6042554005232
ADGRA2_2	962.5050522284812	804.2047676840906	1005.1679085558266	728.8000500669448
ADGRA2_3	1906.0257839001874	1858.3777227624212	1336.7481937433295	2265.806722820069
ADGRA2_4	953.0128919500937	1309.7584051106435	518.2245337678899	744.0287078295377
ADGRA3_1	955.8605400336099	915.6138100058679	611.0253054084174	1424.9672620711906
ADGRA3_2	2308.493379703813	2172.9444304944986	2203.2362974880307	2070.0096944438747
ADGRA3_3	1682.0108013302452	1595.302589212678	1194.9402730342088	1563.112943203283
ADGRA3_4	1046.9852787061288	1110.3455814590586	1112.5665543869989	1316.1911351955273
ADGRB1_1	971.0479964790298	1232.052938617303	640.221053789707	1169.3433639133816
ADGRB1_2	1019.4580138988055	1120.6438962955256	457.74762640664716	635.2525809538743
ADGRB1_3	537.2562717567262	396.9532264238119	196.0285962743728	195.79702837619413
ADGRB1_4	737.5408536307001	828.5462391157394	511.96830197189917	952.8788714308114
ADGRB2_1	1377.31245639401	1154.3474721239622	1580.7412337869637	819.0842353737454
ADGRB2_2	1559.5619337390478	1368.739662810408	1673.5420054274912	1376.018004977142
ADGRB2_3	815.3765679134766	716.2009863542833	700.6979611509496	609.1463105037151
ADGRB2_4	1185.5708187705848	1379.9741880865536	1721.5064491967528	1587.043691115929
ADGRB3_1	1340.2930313082993	1305.0773529122494	1024.97930924313	766.8716944734269
ADGRB3_2	782.1540069391208	858.504973185461	402.4842455420633	693.9916894667325
ADGRB3_3	1505.4566201522398	1446.4451293037484	1965.499489240387	1674.0645926164598
ADGRB3_4	1130.516289155938	1170.263049598502	849.8048189553928	1043.1630567376121
ADGRD1_1	885.6185539735433	590.7487874373238	1322.1503195526848	730.9755726044581
ADGRD1_2	1679.163153246729	1739.4789969232133	1967.5848998390504	1894.8801301740566
ADGRD1_3	1704.791985998375	1416.4863952340268	1574.4850019909732	2167.908208631972
ADGRD1_4	123.39808361903604	42.12946978554607	33.36656957861665	232.78091151391968
ADGRE1_1	1750.3543553346344	1650.5390051537272	948.8618223919109	638.5158647601442
ADGRE1_2	863.7865853332523	867.8670775822491	1239.7766009054749	317.62629047693713
ADGRE1_3	1122.922560933228	994.2554869388873	1407.65215409789	1230.2579949637532
ADGRE1_4	1449.452874509754	1584.0680639365323	1910.236108375803	870.2090150053073
ADGRE2_1	1150.4498257405514	945.5725440755896	1015.5949615491443	1187.8353054822444
ADGRE2_2	1035.594686372064	851.0152896680306	1322.1503195526848	1011.6179799436696
ADGRE2_3	921.6887630314154	995.1916973785661	1013.5095509504807	914.8072270243292
ADGRE2_4	131.9410278695847	169.4540895818631	10.427052993317702	26.106270450159215
ADGRE3_1	1057.426655012355	1083.1954787083735	913.4098422146308	761.4328881296439
ADGRE3_2	888.4662020570595	921.2310726439407	523.4380602645487	364.4000250334724
ADGRE3_3	874.2279616394785	922.1672830836195	612.0680107077492	906.1051368742761
ADGRE3_4	1470.3356271222065	1663.6459513092304	1213.7089684221805	997.4770834498335
ADGRE5_1	935.9270034489965	948.381175394626	1032.2782463384526	1631.641903134951
ADGRE5_2	317.9873693259775	409.12396213963626	327.4094639901759	267.589272114132
ADGRE5_3	1293.781445944201	1206.7752567459752	1224.1360214154984	962.6687228496211
ADGRE5_4	765.0681184380235	624.4523632657606	214.79729166234466	434.016746233897
ADGRF1_1	1327.0040069185568	1372.4845045691231	1834.118621524584	1019.2323088249661
ADGRF1_2	1533.933100987402	1526.0230166764466	2162.5707908140917	1128.0084357006294
ADGRF1_3	1211.1996515222306	1267.6289353250972	1474.385293255123	1300.9624774329343
ADGRF1_4	494.54155050398293	614.1540484292939	456.7049211073154	443.80659765270667
ADGRF2_1	402.4675958036253	423.1671187348183	395.1853084467409	432.92898496514033
ADGRF2_2	1111.531968599163	1234.8615699363393	1707.9512803054397	452.50868780275977
ADGRF2_3	946.3683797552226	886.5912863758251	1284.612928776741	643.9546711039274
ADGRF2_4	1270.0510452482326	1159.964734762035	2116.6917576434935	2116.78342900041
ADGRF3_1	1169.4341462973262	1245.1598847728062	1579.6985284876318	1578.341600965876
ADGRF3_2	1544.3744772936282	1170.263049598502	747.6196996208793	1786.104003298393
ADGRF3_3	1483.6246515119487	1514.788491400301	2304.378711523212	1278.119490789045
ADGRF3_4	1404.8397212013335	1507.2988078828705	1202.239210129531	1113.8675392067933
ADGRF4_1	714.7596689625703	808.8858198824846	869.6162196426964	572.1624273659895
ADGRF4_2	1266.2541811368776	1118.771475416168	977.0148654738688	989.862754568537
ADGRF4_3	1170.3833623251649	1146.857788606532	892.5557362279953	827.7863255237985
ADGRF4_4	979.5909407295785	1100.047266622592	1115.6946702849941	869.1212537365506
ADGRF5_1	824.8687281918641	907.1879160487588	930.0931270039391	1085.5857462191207
ADGRF5_2	797.3414633845406	1019.5331688102149	1081.2853954070458	708.1325859605688
ADGRF5_3	760.3220382988297	613.2178379896151	443.14975221600235	340.46927712082646
ADGRF5_4	728.9979093801514	740.542457785932	934.2639482012662	484.05376459670214
ADGRG1_1	960.6066201728037	978.3399094643477	864.4026931460376	1170.4311251821382
ADGRG1_2	2285.712195035683	2612.0271267038565	1749.6594922787106	2221.2085108010465
ADGRG1_3	939.7238675603514	960.5519111104504	828.9507129687573	1178.0454540634346
ADGRG1_4	797.3414633845406	827.6100286760606	1149.0612398636108	518.8621251969145
ADGRG2_1	1368.7695121434613	1526.9592271161255	2266.8413207472686	2213.59418191975
ADGRG2_2	742.2869337698937	897.8258116519708	863.3599878467057	1039.899772931342
ADGRG2_3	897.0091463076081	1034.5125358450757	1218.9224949188394	1286.821580939098
ADGRG2_4	795.4430313288632	974.5950677056325	1238.733895606143	764.6961719359138
ADGRG3_1	1105.8366724321306	829.4824495554182	584.9576729251231	1603.3601101472786
ADGRG3_2	1434.2654180643344	2033.449074982357	1223.0933161161665	1174.7821702571648
ADGRG3_3	701.470644572828	745.223509984326	1057.3031735224151	1000.7403672561034
ADGRG3_4	1174.18022643652	1220.8184133411573	1137.5914815709614	1146.5003772694922
ADGRG4_1	1183.6723867149074	935.2742292391227	911.3244316159672	850.6293121676878
ADGRG4_2	1661.128048717793	1436.1468144672817	2052.0440290849237	1954.7069999556713
ADGRG4_3	1079.258623652646	1247.0323056521636	1309.6378559607035	1803.5081835984993
ADGRG4_4	541.0531358680811	535.5123714962745	391.01448724941383	527.5642153469676
ADGRG5_1	1351.6836236423642	1118.771475416168	1603.6807503722625	1533.7433889468539
ADGRG5_2	873.2787456116397	996.1279078182449	678.8011498649824	825.6108029862852
ADGRG5_3	1145.7037456013577	1293.8428276361037	972.8440442765417	1449.9857712525932
ADGRG5_4	890.364634112737	909.0603369281164	1008.2960244538218	1572.9027946220929
ADGRG6_1	1541.5268292101118	1607.4733249285023	1878.95494939585	1138.8860483881958
ADGRG6_2	1274.7971253874261	1144.0491572874955	1885.2111811918405	2001.4807345122067
ADGRG6_3	896.0599302797694	1012.9796957324633	932.1785376026027	1120.394106819333
ADGRG6_4	41.76550522490451	36.51220714747326	226.26704995499415	30.457315525185752
ADGRG7_1	967.2511323676748	1064.4712699147974	1137.5914815709614	539.5295893032904
ADGRG7_2	1244.4222124965866	1519.469543598695	1148.018534564279	1204.151724513594
ADGRG7_3	1205.5043553551982	1073.8333743115854	1382.6272269139274	1534.8311502156107
ADGRG7_4	890.364634112737	927.7845457216923	905.0681998199766	696.1672120042458
ADGRL1_1	1369.7187281713002	1668.3270035076243	1879.9976546951818	1398.8609916210314
ADGRL1_2	1103.9382403764532	1362.1861897326562	1636.0046146515476	1640.3439932850042
ADGRL1_3	1946.8420730972532	2027.8318123442841	1305.4670347633764	1911.196549205406
ADGRL1_4	1637.3976480218244	1635.5596381188664	1166.787229952251	1222.6436660824565
ADGRL2_1	1290.9337978606848	1212.392519384048	1578.6558231883002	1067.0938046502579
ADGRL2_2	962.5050522284812	1141.2405259684592	1722.5491544960844	1148.6758998070056
ADGRL2_3	1452.3005225932704	1172.1354704778596	909.2390210173037	953.9666326995681
ADGRL2_4	440.4362369171748	301.4597615765741	981.1856866711958	244.74628547024267
ADGRL3_1	1279.5432055266199	1874.2933002369607	1778.8552406600002	1409.7386043085978
ADGRL3_2	990.9815330636434	1029.8314836466818	721.552067137585	763.608410667157
ADGRL3_3	1162.789634102455	1147.7939990462107	1162.616408754924	1194.3618730947842
ADGRL3_4	803.036759551573	836.0359226331698	1164.7018193535873	888.70095657417
ADGRL4_1	1219.7425957727794	1061.6626385957609	913.4098422146308	581.9522787847992
ADGRL4_2	818.2242159969928	802.332346804733	494.2423118832591	907.1928981430328
ADGRL4_3	1157.0943379354226	1116.8990545368104	1866.4424858038687	1379.281288783412
ADGRL4_4	1588.9876306020487	1171.1992600381807	2072.8981350715594	1728.4526560542915
ADGRV1_1	803.036759551573	988.6382243008145	527.6088814618757	767.9594557421836
ADGRV1_2	1415.2810975075595	1283.544512799637	1832.0332109259202	1753.4711652356941
ADGRV1_3	688.1816201830857	846.3342374696366	314.8970003981946	872.3845375428205
ADGRV1_4	483.15095816991806	315.5029181717561	99.05700343651817	144.67224874463233
ADH1A_1	691.9784842944406	824.8013973570241	1016.637666848476	1369.4914373646022
ADH1A_2	826.7671602475415	818.2479242792725	573.4879146324737	463.3863004903261
ADH1A_3	1643.0929441888568	1699.221948017025	1959.2432574443962	2742.2461585354745
ADH1A_4	1543.4252612657892	1775.0549936310078	1615.1505086649122	1617.5010066411148
ADH1B_1	1211.1996515222306	1075.705795190943	1227.2641373134936	1813.2980350173088
ADH1B_2	901.7552264468019	885.6550759361463	1193.897567734877	1395.5977078147614
ADH1B_3	1574.7493901844678	1334.0998765422923	1715.250217400762	1514.1636861092345
ADH1B_4	1792.119860559539	1745.0962595612862	2984.2225666875265	3382.937545833132
ADH1C_1	1205.5043553551982	1177.7527331159324	1621.4067404609027	1514.1636861092345
ADH1C_2	1560.5111497668865	1700.1581584567036	1758.0011346733647	1867.6860984551406
ADH1C_3	785.001655022637	608.5367857912211	647.5199908850293	394.85734055865817
ADH1C_4	1678.2139372188901	1268.5651457647762	1973.8411316350412	1930.7762520430254
ADH4_1	744.1853658255712	752.7131935017565	410.8258879367175	377.45316025855203
ADH4_2	1348.8359755588478	1460.4882858989304	1739.2324392853927	1672.9768313477032
ADH4_3	1717.1317943602785	1400.5708177594872	1357.602299729965	719.0101986481351
ADH4_4	215.4720383193937	261.20271267038567	548.4629874485112	156.6376227009553
ADH5_1	1030.8486062328705	1059.7902177164033	1056.2604682230833	660.2710901352768
ADH5_2	966.3019163398361	958.6794902310928	399.356129644068	699.4304958105157
ADH5_3	980.5401567574172	904.3792847297224	271.10337782626027	629.8137746100911
ADH5_4	914.0950348087055	744.2872995446472	596.4274312177726	846.2782670926613
ADH6_1	2263.880226395392	1892.081298590858	2448.2720428309967	2650.874211959917
ADH6_2	428.0964285552712	297.7149198178589	218.96811285967175	234.95643405143295
ADH6_3	580.9202090373082	554.2365802898505	277.3596096222509	506.89675124059147
ADH6_4	1609.870383214501	1964.1695024461258	944.6910011945838	2022.1481986185827
ADH7_1	1749.4051393067957	1132.8146320113499	1494.1966939424267	1801.3326610609859
ADH7_2	672.044947709827	751.7769830620776	811.2247228801173	817.9964741049888
ADH7_3	1050.7821428174839	1164.6457869604292	1264.8015280894374	853.8925959739577
ADH7_4	586.6155052043406	719.9458281129984	618.3242425037398	437.2800300401669
ADHFE1_1	1363.0742159764288	1354.6965062152258	998.9116767598359	1612.0622002973316
ADHFE1_2	1847.1743901741856	1910.8055073844341	2025.9763966016296	2779.2300416732
ADHFE1_3	832.4624564145739	764.8839292175809	792.4560274921454	845.1905058239047
ADHFE1_4	605.5998257611153	709.6475132765316	540.121345053857	714.6591535731086
ADI1_1	1724.7255225829883	1804.0775172610506	3087.4503913213716	4593.615837959265
ADI1_2	1319.410278695847	1190.8596792714357	1079.1999848083822	1827.4389315111453
ADI1_3	807.7828396907668	804.2047676840906	1368.0293527232825	1757.8222103107205
ADI1_4	691.9784842944406	925.9121248423347	599.5555471157679	1246.5744139951025
ADIG_1	686.2831881274082	770.5011918556537	793.4987327914772	615.6728781162549
ADIG_2	1996.2013065448677	1526.9592271161255	1857.0581381098827	998.56484471859
ADIG_3	1171.3325783530038	1063.5350594751185	1697.5242273121219	1058.391714500205
ADIG_4	242.99930312671714	252.7768187132764	51.092559667256744	102.2495592631236
ADIPOQ_1	1623.1594076042434	981.1485407833841	1797.623936047972	1981.901031674587
ADIPOQ_2	1127.6686410724217	1196.4769419095085	706.9541929469402	1546.7965241719337
ADIPOQ_3	1909.8226480115425	1790.0343606658687	1280.442107579414	1288.9971034766113
ADIPOQ_4	1998.0997386005452	1851.8242496846694	1765.300071768687	1956.8825224931845
ADIPOR1_1	1197.9106271324883	843.5256061506002	1253.3317697967877	860.4191635864976
ADIPOR1_2	1404.8397212013335	1527.8954375558042	2120.862578840821	2707.437797935262
ADIPOR1_3	780.2555748834433	836.0359226331698	1750.7021975780422	1857.896247036331
ADIPOR1_4	512.576655032919	569.2159473247114	457.74762640664716	645.042432372684
ADIPOR2_1	1440.9099302592056	1348.1430331374743	1275.228581082755	3184.9649949194245
ADIPOR2_2	1170.3833623251649	1271.3737770838125	1221.0079055175029	1418.4406944586508
ADIPOR2_3	907.4505226138343	836.9721330728486	960.3315806845604	1897.0556527115698
ADIPOR2_4	1198.859843160327	1510.107439201907	1422.2500282885346	2984.816921468204
ADIRF_1	915.0442508365442	813.5668720808786	640.221053789707	827.7863255237985
ADIRF_2	649.2637630416973	715.2647759146045	252.3346824382884	164.25195158225173
ADIRF_3	1616.5148954093722	2021.2783392665326	1952.9870256484057	1669.7135475414332
ADIRF_4	670.1465156541497	635.6868885419062	684.0146763616412	696.1672120042458
ADK_1	1244.4222124965866	1301.3325111535341	798.712259288136	1271.592923176505
ADK_2	1736.1161149170532	1489.5108095289734	1561.972538398992	1272.680684445262
ADK_3	1226.3871079676505	1524.150595797089	1022.8938986444666	1625.1153355224112
ADK_4	1037.4931184277416	819.1841347189513	616.2388319050763	834.3128931363383
ADM_1	1339.3438152804604	1338.7809287406862	2083.325188064877	1270.5051619077485
ADM_2	725.2010452687964	748.0321413033624	1209.5381472248534	730.9755726044581
ADM_3	661.603571403601	566.4073160056749	579.7441464284642	813.6454290299623
ADM_4	912.1966027530281	873.4843402203219	1452.488481969156	667.8854190165733
ADM2_1	1777.881620141958	1745.0962595612862	2228.261224671993	1900.3189365178396
ADM2_2	1201.7074912438434	1135.6232633303864	1652.6878994408557	1370.5791986333588
ADM2_3	1570.9525260731127	1375.2931358881594	1359.6877103286283	2036.2890951124189
ADM2_4	1219.7425957727794	947.4449649549472	1170.958051149578	1449.9857712525932
ADM5_1	704.3182926563442	476.53111379651	375.3739077594373	436.1922687714102
ADM5_2	728.9979093801514	1006.4262226547118	1016.637666848476	856.068118511471
ADM5_3	684.3847560717306	711.5199341558892	994.7408555625088	1066.0060433815013
ADM5_4	201.23379790181264	285.5441841020345	272.14608312559204	191.4459833011676
ADNP_1	1110.5827525713244	1116.8990545368104	1236.6484850074796	504.72122870307817
ADNP_2	938.7746515325127	851.0152896680306	1008.2960244538218	851.7170734364445
ADNP_3	1413.382665451882	1081.3230578290159	1640.1754358488747	939.8257362057318
ADNP_4	1324.1563588350407	1163.7095765207503	806.0111963834584	592.8298914723656
ADNP2_1	1453.2497386211091	1315.3756677487163	1502.5383363370809	2049.3422303374987
ADNP2_2	1441.8591462870443	1530.7040688748407	2363.812913585123	2229.9106009510997
ADNP2_3	1279.5432055266199	1206.7752567459752	1470.214472057796	2068.921933175118
ADNP2_4	794.4938153010244	719.0096176733196	1113.6092596863307	661.3588514040335
ADO_1	1273.8479093595874	1416.4863952340268	1029.1501304404571	1037.724250393829
ADO_2	837.2085365537677	639.4317303006214	1072.9437530123917	752.7307979795908
ADO_3	640.7208187911488	920.2948622042619	577.6587358298008	311.09972286439734
ADO_4	1285.2385016936523	1323.8015617058254	1104.2249119923447	899.5785692617363
ADORA1_1	477.4556620028856	592.6212083166814	384.7582554534232	806.0311001486658
ADORA1_2	1125.7702090167443	838.8445539522062	1192.854862435545	869.1212537365506
ADORA1_3	454.6744773347559	499.00016434880126	761.1748685121922	637.4281034913876
ADORA1_4	900.8060104189632	788.289190209551	255.46279833628373	833.2251318675817
ADORA2A_1	836.2593205259288	1447.3813397434271	626.6658848983939	751.6430367108342
ADORA2A_2	2008.5411149067713	2153.2840112612434	1978.0119528323683	1531.5678664093407
ADORA2A_3	957.7589720892875	834.1635017538122	709.0396035456038	949.6155876245415
ADORA2A_4	910.2981706973505	964.2967528691656	988.4846237665182	838.6639382113649
ADORA2B_1	1176.0786584921973	1144.9853677271744	1356.559594430633	1642.5195158225174
ADORA2B_2	925.4856271427703	899.6982325313284	1349.2606573353107	1558.7618981282565
ADORA2B_3	1118.1764807940344	953.06222759302	1076.071868910387	875.6478213490903
ADORA2B_4	1705.7412020262136	1746.0324700009648	1867.4851911032006	1218.2926210074302
ADORA3_1	1477.9293553449163	1328.4826139042195	684.0146763616412	586.3033238598257
ADORA3_2	1150.4498257405514	1206.7752567459752	790.3706168934818	1318.3666577330405
ADORA3_3	1637.3976480218244	1447.3813397434271	2361.7275029864595	958.3176777745946
ADORA3_4	1583.2923344350163	1321.9291408264678	1866.4424858038687	1048.6018630813953
ADPGK_1	962.5050522284812	996.1279078182449	1574.4850019909732	812.5576677612056
ADPGK_2	1360.2265678929127	1264.820304006061	1409.7375646965534	1701.2586243353755
ADPGK_3	1908.8734319837038	1893.9537194702157	2723.546241854584	3973.5919147679842
ADPGK_4	1421.9256097024308	1246.096095212485	1453.5311872684877	1344.4729281831997
ADPRH_1	838.1577525816064	733.0527742685016	600.5982524150996	984.4239482247538
ADPRH_2	1159.941986018939	1101.9196875019495	856.0610507513834	1210.6782921261338
ADPRH_3	1805.4088849492812	1620.5802710840055	1374.2855845192732	1124.7451518943597
ADPRH_4	1196.012195076811	1364.9948210516927	1448.317660771829	1231.3457562325098
ADPRHL1_1	1794.0182926152163	1700.1581584567036	2023.890986002966	2270.1577678950953
ADPRHL1_2	981.4893727852559	1001.7451704563177	723.6374777362486	556.9337696033966
ADPRHL1_3	1404.8397212013335	1098.1748457432343	2059.342966180246	1218.2926210074302
ADPRHL1_4	859.9897212218974	823.8651869173453	1207.45273662619	659.1833288665202
ADPRHL2_1	735.6424215750226	601.0471022737906	901.9400839219812	535.178544228264
ADPRHL2_2	1033.6962543163866	711.5199341558892	1052.0896470257562	848.4537896301746
ADPRHL2_3	1171.3325783530038	1559.7265925048835	1337.7908990426613	1664.27474119765
ADPRHL2_4	905.5520905581568	918.4224413249043	1394.0969852065768	909.368420680546
ADPRM_1	1240.6253483852317	1292.906617196425	1000.9970873584995	1770.8753455358003
ADPRM_2	1323.207142807202	1145.9215781668531	1891.4674129878313	1692.5565341853226
ADPRM_3	1281.4416375822975	876.2929715393583	1334.6627831446658	985.5117094935105
ADPRM_4	1075.461759541291	997.0641182579237	1427.4635547851935	618.9361619225248
ADRA1A_1	1742.7606271119246	1754.4583639580742	1595.3391079776086	1822.000125167362
ADRA1A_2	1461.7926828716577	1653.3476364727635	1938.3891514577608	2085.2383522064674
ADRA1A_3	941.622299616029	743.3510891049684	1102.1395013936813	981.1606644184839
ADRA1A_4	1140.0084494343253	961.4881215501292	600.5982524150996	1429.3183071462172
ADRA1B_1	2261.032578311876	2740.2879569398524	2365.898324183787	2136.3631318380294
ADRA1B_2	95.87081881171262	145.11261815021425	78.20289744988277	233.86867278267633
ADRA1B_3	1430.4685539529794	2118.644224993128	2475.3823806136224	2122.222235344193
ADRA1B_4	896.0599302797694	911.8689682471527	698.612550552286	751.6430367108342
ADRA1D_1	522.0688153113064	636.623098981585	118.8684041238218	264.3259883078621
ADRA1D_2	1101.0905922929371	1169.326839158823	906.1109051193083	1236.784562576293
ADRA1D_3	773.6110626885721	944.6363336359108	724.6801830355803	505.8089899718348
ADRA1D_4	1162.789634102455	1193.668310590472	972.8440442765417	871.2967762740639
ADRA2A_1	982.4385888130947	1069.1523221131913	1066.687521216401	857.1558797802276
ADRA2A_2	1585.190766490694	1436.1468144672817	2126.0761053374795	2139.626415644299
ADRA2A_3	370.19425085710816	337.03575828436857	855.0183454520516	665.70989647906
ADRA2A_4	917.8918989200604	1134.6870528907075	1991.567121723681	1932.9517745805388
ADRA2B_1	1216.894947689263	1778.799835389723	717.3812459402579	1504.373834690425
ADRA2B_2	1045.0868466504514	971.786436386596	980.142981371864	1096.463358906687
ADRA2B_3	475.55722994720816	629.1334154641546	1051.0469417264244	417.70032720254744
ADRA2B_4	431.89329266662617	296.7787093781801	410.8258879367175	128.35582971328282
ADRA2C_1	1623.1594076042434	1992.2558156364898	1312.7659718586988	1610.974439028575
ADRA2C_2	1053.629790901	1042.938429802185	1246.0328327014654	1696.9075792603492
ADRA2C_3	825.8179442197028	606.6643649118635	801.8403751861313	982.2484256872406
ADRA2C_4	526.8148954505	488.70184951233443	530.7369973598711	716.8346761106218
ADRB1_1	306.59677699191263	398.8256473031695	460.8757423046425	935.4746911307053
ADRB1_2	1485.5230835676261	1141.2405259684592	1695.4388167134584	2187.487911469591
ADRB1_3	1381.109320505365	1549.4282776684165	1593.253697378945	2287.5619481952012
ADRB1_4	411.95975608201263	419.4222769761031	906.1109051193083	274.11583972667177
ADRB2_1	1105.8366724321306	1086.0041100274098	1260.6307068921103	734.238856410728
ADRB2_2	1266.2541811368776	1118.771475416168	1861.2289593072098	1494.5839832716151
ADRB2_3	15.187456445419821	10.298314836466817	7.298937095322392	5.43880634378317
ADRB2_4	838.1577525816064	801.3961363650542	1201.1965048301993	712.4836310355953
ADRB3_1	1567.1556619617577	1359.37755841362	1235.6057797081478	1150.8514223445188
ADRB3_2	1137.1608013508092	1450.1899710624637	1278.3566969807503	1247.6621752638594
ADRB3_3	1372.5663762548163	1733.8617342851405	926.9650111059437	1942.7416259993483
ADRB3_4	830.5640243588965	913.7413891265103	450.44868931132476	1603.3601101472786
ADRBK1_1	1072.614111457775	1319.1205095074315	1002.0397926578312	938.7379749369752
ADRBK1_2	991.9307490914821	1306.0135633519283	1100.0540907950176	1376.018004977142
ADRBK1_3	1201.7074912438434	1252.6495682902364	1343.00442553932	1612.0622002973316
ADRBK1_4	651.1621950973748	597.3022605150754	626.6658848983939	471.00062937162255
ADRBK2_1	978.6417247017397	1246.096095212485	920.7087793099531	1013.7935024811829
ADRBK2_2	1792.119860559539	1435.2106040276028	1631.8337934542205	1248.749936532616
ADRBK2_3	897.0091463076081	1163.7095765207503	1047.9188258284291	869.1212537365506
ADRBK2_4	1240.6253483852317	1079.4506369496582	820.6090705741032	750.5552754420775
ADRM1_1	1285.2385016936523	1017.6607479308573	588.0857888231184	913.7194657555726
ADRM1_2	1587.0891985463713	1388.4000820436627	937.3920640992615	852.8048347052011
ADRM1_3	889.4154180848983	897.8258116519708	391.01448724941383	259.9749432328355
ADRM1_4	516.3735191442739	311.7580764130409	253.37738773762018	189.2704607636543
ADSL_1	1049.8329267896452	931.5293874804075	227.30975525432592	270.85255592040187
ADSL_2	1645.9405922723731	1482.9573364512216	168.91825849174677	701.6060183480289
ADSL_3	679.638675932537	667.5180434909855	65.69043385790152	404.64719197746786
ADSL_4	1705.7412020262136	1780.6722562690807	108.4413511305041	410.08599832125105
ADSS_1	578.0725609537919	530.8313192978804	47.96444376926143	355.69793488341935
ADSS_2	1775.9831880862803	1668.3270035076243	310.72617920086753	585.2155625910691
ADSS_3	1292.8322299163622	1198.349362788866	182.4734273830598	571.0746660972329
ADSS_4	1312.7657665009758	1253.5857787299153	1062.5167000190738	515.5988413906446
ADSSL1_1	1383.0077525610425	1141.2405259684592	1654.7733100395194	691.8161669292192
ADSSL1_2	1405.7889372291722	1371.5482941294442	1227.2641373134936	1283.558297132828
ADSSL1_3	1059.3250870680324	1127.197369373277	1053.132352325088	571.0746660972329
ADSSL1_4	724.2518292409577	623.5161528260818	410.8258879367175	736.4143789482413
ADTRP_1	1044.1376306226127	1302.268721593213	1042.7052993317702	1380.3690500521686
ADTRP_2	1115.328832710518	651.6024660164459	697.5698452529543	1135.6227645819258
ADTRP_3	716.6581010182479	846.3342374696366	530.7369973598711	1244.3988914575893
ADTRP_4	1305.172038278266	1144.9853677271744	1388.883458709918	1158.4657512258152
AEBP1_1	1016.6103658152892	1151.538840804926	1314.8513824573622	1881.8269949489768
AEBP1_2	1116.2780487383568	1222.690834220515	970.7586336778782	998.56484471859
AEBP1_3	1134.3131532672928	1306.0135633519283	1087.5416272030363	1141.061570925709
AEBP1_4	1168.4849302694874	908.1241264884376	449.405984011993	1073.620372262798
AEBP2_1	1324.1563588350407	1452.0623919418213	1698.5669326114537	1206.3272470511072
AEBP2_2	1140.957665462164	943.700123196232	945.7337064939156	1986.2520767496137
AEBP2_3	425.24878047175497	410.99638301899387	1018.7230774471395	936.5624523994619
AEBP2_4	1133.3639372394541	1296.6514589551402	1672.4993001281596	1372.7547211708722
AEN_1	1532.9838849595633	1488.5745990892945	2692.265082874631	2413.7422553709707
AEN_2	896.0599302797694	639.4317303006214	570.3597987344783	620.0239231912814
AEN_3	1751.3035713624731	2216.946321159402	1383.669932213259	2041.727901456202
AEN_4	927.3840591984479	1001.7451704563177	304.4699474048769	467.73734556535265
AES_1	1079.258623652646	864.1222358235339	915.4952528132943	1183.4842604072178
AES_2	1687.7060974972776	1616.8354293252903	769.5165109068464	1114.9553004755498
AES_3	820.1226480526703	882.8464446171099	513.0110072712309	666.7976577478166
AES_4	1063.1219511793875	902.5068638503648	1265.844233388769	646.1301936414407
AFAP1_1	843.8530487486388	545.8106863327413	406.6550667393904	675.4997478978697
AFAP1_2	1211.1996515222306	1309.7584051106435	1381.5845216145956	1841.5798280049814
AFAP1_3	671.0957316819884	648.7938346974095	550.5483980471747	217.55225375132682
AFAP1_4	1144.754529573519	775.1822440540477	816.4382493767761	1393.4221852772482
AFAP1L1_1	438.5378048614973	452.1896423648612	637.0929378917116	813.6454290299623
AFAP1L1_2	355.0067944116883	386.65491158734505	101.14241403518172	288.256736220508
AFAP1L1_3	790.6969511896694	1073.8333743115854	466.08926880130133	556.9337696033966
AFAP1L1_4	71.19120208790541	77.70546649334054	75.07478155188745	38.07164440648219
AFAP1L2_1	1527.2885887925308	1347.2068226977954	1164.7018193535873	854.9803572427144
AFAP1L2_2	1028.0009581493541	1058.8540072767246	755.9613420155334	1175.8699315259214
AFAP1L2_3	1052.6805748731613	880.9740237377523	1091.7124484003634	1496.7595058091285
AFAP1L2_4	1211.1996515222306	1096.3024248638767	1387.840753410586	1461.9511452089162
AFF1_1	1280.4924215544586	1362.1861897326562	1275.228581082755	723.3612437231616
AFF1_2	1160.8912020467776	859.4411836251398	1388.883458709918	992.0382771060503
AFF1_3	1337.445383224783	894.0809698932555	810.1820175807854	1095.3755976379305
AFF1_4	138.58554006445587	140.43156595182023	52.135264966588515	110.95164941317667
AFF2_1	643.5684668746649	773.3098231746901	1224.1360214154984	825.6108029862852
AFF2_2	1630.7531358269532	1273.24619796317	1878.95494939585	2428.970913133564
AFF2_3	861.8881532775748	836.9721330728486	696.5271399536225	847.3660283614179
AFF2_4	933.0793553654803	1286.3531441186733	1268.9723492867645	1315.1033739267705
AFF3_1	1691.5029616086326	2106.4734892773035	828.9507129687573	1187.8353054822444
AFF3_2	1090.649215986711	766.7563500969385	532.8224079585347	443.80659765270667
AFF3_3	1501.6597560408848	1319.1205095074315	1055.2177629237515	984.4239482247538
AFF3_4	359.752874550882	464.36037808068556	474.43091119595545	214.2889699450569
AFF4_1	1588.03841457421	1521.3419644780527	2036.4034495949472	1628.3786193286812
AFF4_2	990.0323170358046	705.9026715178164	840.4204712614069	418.7880884713041
AFF4_3	980.5401567574172	1197.4131523491872	1249.1609485994607	2014.5338697372863
AFF4_4	842.9038327208001	624.4523632657606	1042.7052993317702	909.368420680546
AFG3L2_1	1364.9726480321065	1265.7565144457396	1021.8511933451349	1246.5744139951025
AFG3L2_2	1426.6716898416244	1576.578380419102	1223.0933161161665	1118.2185842818199
AFG3L2_3	1366.8710800877839	1284.4807232393157	644.391874987034	944.1767812807583
AFG3L2_4	114.8551393684874	169.4540895818631	717.3812459402579	25.01850918140258
AFM_1	748.931445964765	635.6868885419062	543.2494609518523	860.4191635864976
AFM_2	1300.4259581390722	1228.3080968585878	889.4276203300001	942.0012587432451
AFM_3	2611.2932925843706	2040.0025480601087	2044.7450919896014	2137.4508931067858
AFM_4	966.3019163398361	964.2967528691656	711.1250141442673	938.7379749369752
AFMID_1	1981.0138500994478	1894.8899299098944	1878.95494939585	1693.6442954540792
AFMID_2	1156.1451219075839	1159.0285243223564	1021.8511933451349	1287.9093422078547
AFMID_3	952.063675922255	1132.8146320113499	1978.0119528323683	1056.2161919626917
AFMID_4	1953.4865852921246	1413.6777639149905	1750.7021975780422	1285.7338196703415
AFP_1	2712.8594075631154	2926.593834435934	2508.748950192239	2804.2485508546024
AFP_2	890.364634112737	902.5068638503648	631.8794113950528	1709.9607144854288
AFP_3	1304.222822250427	1156.2198930033198	1183.4705147415593	884.3499114991434
AFP_4	798.2906794123793	703.09404019878	630.836706095721	554.7582470658833
AFTPH_1	1191.2661149376172	1382.7828194055899	1298.1680976680539	1498.9350283466417
AFTPH_2	940.6730835881901	1142.176736408138	1132.3779550743025	987.6872320310237
AFTPH_3	842.9038327208001	774.2460336143689	900.8973786226495	784.2758747735331
AFTPH_4	1161.8404180746163	1041.0660089228275	1054.1750576244197	1318.3666577330405
AGA_1	576.1741288981144	510.23468962494684	669.4168021709964	622.1994457287947
AGA_2	1065.9695992629038	1127.197369373277	1094.8405642983587	1290.084864745368
AGA_3	1044.1376306226127	733.9889847081804	810.1820175807854	970.2830517309176
AGA_4	1789.2722124760226	1649.6027947140483	1435.8051971798477	1690.3810116478094
AGAP1_1	1346.9375435031704	1315.3756677487163	1716.2929227000939	1300.9624774329343
AGAP1_2	1289.984581832846	1262.0116726870244	1467.0863561598007	1737.1547462043445
AGAP1_3	780.2555748834433	729.3079325097864	1051.0469417264244	819.0842353737454
AGAP1_4	1053.629790901	775.1822440540477	396.2280137460727	1087.761268756634
AGAP11_1	885.6185539735433	622.5799423864031	1549.4600748070106	1419.5284557274074
AGAP11_2	1228.285540023328	1531.6402793145194	964.5024018818875	414.43704339627755
AGAP11_3	1086.852351875356	1034.5125358450757	310.72617920086753	501.45794489680827
AGAP11_4	517.3227351721126	816.3755033999149	686.1000869603048	271.9403171891585
AGAP2_1	780.2555748834433	944.6363336359108	727.8082989335757	801.6800550736393
AGAP2_2	879.9232578065108	744.2872995446472	971.8013389772099	451.4209265340031
AGAP2_3	1407.6873692848496	1579.3870117381382	915.4952528132943	1224.81918861997
AGAP2_4	831.5132403867352	936.2104396788015	1014.5522562498124	1394.5099465460048
AGAP3_1	1550.0697734606606	1663.6459513092304	1570.314180793646	1693.6442954540792
AGAP3_2	669.1972996263108	635.6868885419062	461.91844760397424	505.8089899718348
AGAP3_3	939.7238675603514	1116.8990545368104	1484.812346248441	1423.879500802434
AGAP3_4	1429.5193379251407	1063.5350594751185	1803.8801678439625	1520.6902537217743
AGAP4_1	298.053832741364	527.0864775391653	71.94666565389215	255.623898157809
AGAP4_2	678.6894599046983	786.4167693301933	283.61584141824153	408.9982370524944
AGAP4_3	816.3257839413154	939.9552814375168	452.5340999099883	129.44359098203944
AGAP4_4	955.8605400336099	1229.2443072982664	368.0749706641149	451.4209265340031
AGAP5_1	1095.3952961259047	1300.3963007138555	586.0003782244548	539.5295893032904
AGAP5_2	624.5841463178901	658.1559390941975	177.25990088640094	324.1528580894769
AGAP5_3	1083.055487764001	1124.3887380542408	950.9472329905744	617.8484006537682
AGAP5_4	659.7051393479235	756.4580352604717	648.5626961843611	701.6060183480289
AGAP6_1	1634.5499999383082	1321.9291408264678	3009.247493871489	1943.829387268105
AGAP6_2	912.1966027530281	853.823920987067	850.8475242547245	398.12062436492806
AGAP6_3	1065.9695992629038	1183.3699957540052	275.27419902358736	310.0119615956407
AGAP6_4	551.4945121743073	636.623098981585	614.1534213064127	526.4764540782108
AGAP9_1	1288.0861497771687	1786.2895189071535	1019.7657827464714	544.9683956470736
AGAP9_2	531.5609755896937	683.4336209655252	228.3524605536577	345.9080834646096
AGAP9_3	754.6267421317974	1081.3230578290159	322.195937493517	430.7534624276271
AGAP9_4	483.15095816991806	520.5330044614137	340.96463288148885	943.0890200120017
AGBL1_1	1455.1481706767865	1399.6346073198083	1600.5526344742673	1493.4962220028585
AGBL1_2	1561.4603657947252	1401.507028199166	1227.2641373134936	1309.6645675829873
AGBL1_3	766.966550493701	941.8277023168744	386.84366605208675	992.0382771060503
AGBL1_4	664.4512194871172	469.9776407187584	745.5342890222157	444.8943589214633
AGBL2_1	628.3810104292451	746.1597204240048	483.8152588899414	804.9433388799092
AGBL2_2	958.7081881171262	1223.6270446601936	850.8475242547245	873.4722988115772
AGBL2_3	1345.0391114474928	1371.5482941294442	1462.9155349624737	1892.7046076365432
AGBL2_4	1330.8008710299118	1131.8784215716712	1403.4813329005628	1294.4359098203945
AGBL3_1	1091.5984320145496	1105.6645292606647	1499.4102204390856	2042.8156627249587
AGBL3_2	1060.2743030958713	753.6494039414353	946.7764117932473	817.9964741049888
AGBL3_3	1642.143728161018	1275.1186188425277	1751.744902877374	1188.923066751001
AGBL3_4	429.9948606109487	335.16333740501096	636.0502325923799	484.05376459670214
AGBL4_1	1263.4065330533613	1299.4600902741765	1662.0722471348417	1282.4705358640715
AGBL4_2	276.221864101073	287.4166049813921	128.25275181780773	241.48300166397274
AGBL4_3	515.4243031164352	565.4711055659961	828.9507129687573	378.5409215273086
AGBL4_4	1341.242247336138	1268.5651457647762	2101.051178153517	2782.49332547947
AGBL5_1	542.9515679237586	514.9157418233409	211.66917576434935	791.8902036548296
AGBL5_2	1259.6096689420065	1204.9028358666176	1564.0579489976553	831.0496093300684
AGBL5_3	952.063675922255	785.4805588905145	1141.7623027682885	760.3451268608871
AGBL5_4	958.7081881171262	782.6719275714781	592.2566100204455	389.41853421487497
AGER_1	1508.304268235756	1588.7491161349262	1387.840753410586	1043.1630567376121
AGER_2	1420.976393674592	1249.8409369712	1050.0042364270926	578.6889949785293
AGER_3	1232.082404134683	1220.8184133411573	1512.9653893303987	1364.052631020819
AGER_4	1136.2115853229704	969.9140155072384	1328.4065513486753	2284.2986643889317
AGFG1_1	852.3959929991875	781.7357171317993	1082.3281007063774	735.3266176794846
AGFG1_2	562.8851045083721	898.7620220916496	431.67999392335287	1034.460966587559
AGFG1_3	1493.1168117903362	1357.5051375342623	1803.8801678439625	838.6639382113649
AGFG1_4	1384.9061846167199	1231.116728177624	1268.9723492867645	1497.8472670778851
AGFG2_1	2174.6539197785505	2546.49239592634	2624.4892384180657	1893.7923689052998
AGFG2_2	1283.340069637975	1387.463871603984	1774.684419462673	1631.641903134951
AGFG2_3	773.6110626885721	835.099712193491	827.9080076694256	660.2710901352768
AGFG2_4	1476.030923289239	1745.0962595612862	2038.488860193611	2812.9506410046556
AGGF1_1	1059.3250870680324	1047.619482000579	723.6374777362486	914.8072270243292
AGGF1_2	1111.531968599163	1191.7958897111143	1017.6803721478078	987.6872320310237
AGGF1_3	1332.6993030855892	1216.1373611427632	1545.2892536096836	1220.4681435449434
AGGF1_4	375.8895470241406	531.7675297375592	671.50221276966	417.70032720254744
AGK_1	884.6693379457046	776.1184544937265	816.4382493767761	1261.8030717576955
AGK_2	580.9202090373082	533.6399506169168	359.73332826946074	519.949886465671
AGK_3	1012.8135017039343	1061.6626385957609	1064.6021106177375	1516.339208646748
AGK_4	1147.6021776570353	1084.1316891480521	746.5769943215475	1420.616216996164
AGL_1	1134.3131532672928	860.3773940648186	1554.6736013036696	1148.6758998070056
AGL_2	755.5759581596361	769.5649814159749	930.0931270039391	245.8340467389993
AGL_3	1065.9695992629038	1058.8540072767246	1637.0473199508792	873.4722988115772
AGL_4	967.2511323676748	1162.7733660810716	902.982789221313	828.8740867925551
AGMAT_1	1016.6103658152892	1174.944101796896	1356.559594430633	620.0239231912814
AGMAT_2	2126.243902358775	2052.173283775933	1882.0830652938453	2708.525559204019
AGMAT_3	670.1465156541497	706.8388819574952	521.3526496658851	770.134978279697
AGMAT_4	1757.9480835573443	1688.923633180558	1465.0009455611373	1417.3529331898942
AGMO_1	1719.9794424437948	1818.1206738562328	1716.2929227000939	1823.0878864361187
AGMO_2	1065.0203832350649	956.8070693517352	775.772742702837	1047.5141018126385
AGMO_3	974.8448605903848	748.0321413033624	739.2780572262251	596.0931752786355
AGMO_4	1267.2033971647163	1553.1731194271317	1333.6200778453342	1509.8126410342081
AGO1_1	1203.6059232995208	889.3999176948615	887.3422097313365	516.6866026594012
AGO1_2	625.5333623457288	904.3792847297224	531.7797026592028	357.8734574209326
AGO1_3	1567.1556619617577	1369.6758732500866	1267.9296439874327	1356.4383021395226
AGO1_4	1004.2705574533857	1190.8596792714357	1603.6807503722625	682.0263155104095
AGO2_1	1668.7217769405029	1332.2274556629347	1132.3779550743025	946.3523038182716
AGO2_2	246.7961672380721	391.33596378573907	334.7084010854982	155.54986143219867
AGO2_3	755.5759581596361	792.0340319682662	533.8651132578664	267.589272114132
AGO2_4	953.0128919500937	806.0771885634482	818.5236599754396	657.0078063290069
AGO3_1	908.399738641673	835.099712193491	828.9507129687573	763.608410667157
AGO3_2	1076.4109755691297	1286.3531441186733	788.2852062948183	989.862754568537
AGO3_3	446.13153308420726	580.450472600857	423.3383515286987	544.9683956470736
AGO3_4	1828.190069617411	1545.6834359097013	2077.0689562688863	1441.2836811025402
AGO4_1	1078.3094076248074	1170.263049598502	990.5700343651818	1052.9529081564217
AGO4_2	583.7678571208244	499.93637478848007	1274.1858757834232	324.1528580894769
AGO4_3	906.5013065859956	710.5837237162104	1053.132352325088	1493.4962220028585
AGO4_4	917.8918989200604	1381.8466089659112	1327.3638460493435	1014.8812637499395
AGPAT1_1	552.443728202146	585.131524799251	764.3029844101876	191.4459833011676
AGPAT1_2	389.17857141388293	212.51976980708795	164.7474372944197	146.8477712821456
AGPAT1_3	838.1577525816064	1007.3624330943904	515.0964178698945	415.5248046650342
AGPAT1_4	1368.7695121434613	1221.754623780836	846.6767030573974	972.4585742684309
AGPAT2_1	1063.1219511793875	1147.7939990462107	968.6732230792146	1504.373834690425
AGPAT2_2	1778.8308361697966	2346.1433618350766	919.6660740106214	1410.8263655773544
AGPAT2_3	1867.1079267587993	2094.302753561479	1760.0865452720282	1271.592923176505
AGPAT2_4	851.4467769713488	1422.1036578720996	1697.5242273121219	1773.0508680733135
AGPAT3_1	847.6499128599937	881.9102341774311	1108.3957331896718	408.9982370524944
AGPAT3_2	1190.3168989097785	1327.5464034645406	1187.6413359388864	997.4770834498335
AGPAT3_3	879.9232578065108	977.4036990246689	1002.0397926578312	1397.7732303522748
AGPAT3_4	721.4041811574415	909.9965473677952	607.8971895104221	580.8645175160426
AGPAT4_1	1252.9651567471353	1303.2049320328917	2135.4604530314655	1792.6305709109329
AGPAT4_2	945.4191637273839	843.5256061506002	1148.018534564279	1058.391714500205
AGPAT4_3	1084.9539198196785	1334.0998765422923	1015.5949615491443	587.3910851285824
AGPAT4_4	1083.055487764001	1054.1729550783307	647.5199908850293	985.5117094935105
AGPAT5_1	1067.8680313185812	1011.1072748531057	2048.9159131869287	943.0890200120017
AGPAT5_2	1235.879268246038	1360.3137688532986	1750.7021975780422	1475.0042804339957
AGPAT5_3	1245.3714285244253	1193.668310590472	810.1820175807854	1120.394106819333
AGPAT5_4	1015.6611497874505	1137.495684209744	1716.2929227000939	1209.590530857377
AGPAT6_1	1551.0189894884993	1108.473160579701	1163.6591140542555	990.9505158372936
AGPAT6_2	979.5909407295785	957.743279791414	1101.0967960943494	1225.9069498887266
AGPAT6_3	692.9277003222793	450.3172214855036	809.1393122814537	1087.761268756634
AGPAT6_4	936.8762194768352	1008.2986435340692	1029.1501304404571	1372.7547211708722
AGPAT9_1	1092.5476480423883	1085.067899587731	1469.1717667584642	1259.6275492201821
AGPAT9_2	598.0060975384055	660.9645704132339	1125.0790179789801	717.9224373793785
AGPAT9_3	1790.2214285038615	1907.060665625719	2851.7989936723916	1819.8246026298486
AGPAT9_4	1852.869686341218	1963.2332920064468	2403.4357149597304	3002.22110176831
AGPS_1	865.6850173889299	988.6382243008145	460.8757423046425	112.0394106819333
AGPS_2	978.6417247017397	835.099712193491	1144.8904186662837	1099.726642712957
AGPS_3	974.8448605903848	882.8464446171099	476.516321794619	862.5946861240108
AGPS_4	718.5565330739253	783.6081380111569	467.1319741006331	533.0030216907506
AGR2_1	1364.0234320042678	1424.912289191136	1024.97930924313	1496.7595058091285
AGR2_2	950.1652438665776	836.0359226331698	680.886560463646	944.1767812807583
AGR2_3	1261.5081009976839	1383.7190298452688	1712.1221015027668	1902.494459055353
AGR2_4	966.3019163398361	946.5087545152684	1344.0471308386518	1135.6227645819258
AGR3_1	1557.6635016833704	1079.4506369496582	1751.744902877374	2132.0120867630026
AGR3_2	1348.8359755588478	1420.231236992742	1413.9083858938804	1941.6538647305917
AGR3_3	1700.0459058591812	1599.9836414110719	1548.4173695076788	1534.8311502156107
AGR3_4	868.5326654724461	1044.8108506815427	1406.609448798558	1131.2717195068994
AGRN_1	1067.8680313185812	1174.0078913572172	997.8689714605041	1447.81024871508
AGRN_2	1173.2310104086812	1206.7752567459752	1261.673412191442	1447.81024871508
AGRN_3	355.0067944116883	358.56859839698103	331.58028518750297	601.5319816224186
AGRN_4	1274.7971253874261	1202.0942045475813	1916.4923401717938	2604.100477403382
AGRP_1	1498.8121079573687	952.1260171533412	1590.1255814809497	1012.7057412124262
AGRP_2	1632.6515678826308	1480.1487051321853	1298.1680976680539	1381.4568113209252
AGRP_3	760.3220382988297	700.2854088797436	447.32057341332944	1319.454419001797
AGRP_4	959.657404144965	858.504973185461	1181.3851041428957	1019.2323088249661
AGT_1	1375.4140243383326	1220.8184133411573	775.772742702837	525.3886928094543
AGT_2	624.5841463178901	724.6268803113924	583.9149676257913	536.2663054970205
AGT_3	199.33536584613515	157.28335386603865	189.77236447838217	32.63283806269902
AGT_4	970.098780451191	1029.8314836466818	1084.413511305041	1418.4406944586508
AGTPBP1_1	1033.6962543163866	798.5875050460178	1142.8050080676203	1262.8908330264521
AGTPBP1_2	731.8455574636677	831.3548704347758	1260.6307068921103	501.45794489680827
AGTPBP1_3	1286.187717721491	1398.6983968801296	1922.7485719677843	1587.043691115929
AGTPBP1_4	774.5602787164108	823.8651869173453	1111.523849087667	734.238856410728
AGTR1_1	532.5101916175324	510.23468962494684	729.8937095322392	796.2412487298561
AGTR1_2	505.9321428380478	359.5048088366598	487.9860800872685	488.4048096717287
AGTR1_3	583.7678571208244	1074.7695847512641	966.5878124805511	671.1487028228432
AGTR1_4	930.2317072819641	895.9533907726131	1084.413511305041	1302.050238701691
AGTR2_1	1461.7926828716577	1489.5108095289734	2592.165374138781	1373.8424824396288
AGTR2_2	809.6812717464442	962.424331989808	446.27786811399767	299.13434890807434
AGTR2_3	841.9546166929613	884.7188654964675	1093.797858999027	1432.581590952487
AGTR2_4	1060.2743030958713	917.4862308852255	849.8048189553928	1220.4681435449434
AGTRAP_1	1258.6604529141678	1158.0923138826774	1325.27843545068	1800.2448997922293
AGTRAP_2	1439.9607142313669	1125.3249484939195	1189.7267465375498	1188.923066751001
AGTRAP_3	702.4198606006668	553.3003698501717	580.786851727796	569.9869048284762
AGTRAP_4	900.8060104189632	812.6306616411998	1302.338918865381	684.2018380479228
AGXT_1	331.27639371571985	399.7618577428483	423.3383515286987	722.273482454405
AGXT_2	1272.8986933317487	1175.8803122365748	1662.0722471348417	1566.376227009553
AGXT_3	977.692508673901	1437.0830249069604	1777.8125353606683	1180.220976600948
AGXT_4	1221.6410278284568	1145.9215781668531	1803.8801678439625	1866.598337186384
AGXT2_1	1057.426655012355	1543.8110150303437	1029.1501304404571	1374.9302437083854
AGXT2_2	1873.7524389536704	1889.2726672718215	1763.2146611700234	1513.075924840478
AGXT2_3	1906.0257839001874	1594.366378772999	1861.2289593072098	2273.4210517013653
AGXT2_4	1405.7889372291722	1709.5202628534917	1023.9366039437983	1160.6412737633286
AHCTF1_1	1666.8233448848255	1803.141306821372	694.441729354959	1072.532610994041
AHCTF1_2	1009.9658536204181	1196.4769419095085	181.43072208372803	663.5343739415467
AHCTF1_3	712.8612369068928	916.5500204455467	460.8757423046425	262.15046577034883
AHCTF1_4	129.09337978606848	127.32461979631701	72.98937095322391	62.00239231912814
AHCY_1	1086.852351875356	1016.7245374911785	205.41294396835875	114.21493321944658
AHCY_2	1515.897996458466	1268.5651457647762	489.02878538660025	380.7164440648219
AHCY_3	1238.7269163295541	1571.8973282207078	394.14260314740915	369.8388313772556
AHCY_4	646.4161149581811	605.7281544721847	551.5911033465064	1428.2305458774606
AHCYL1_1	783.1032229669595	672.1990956893795	600.5982524150996	726.6245275294316
AHCYL1_2	1138.1100173786479	1087.8765309067674	946.7764117932473	314.36300667066723
AHCYL1_3	1029.8993902050315	975.5312781453113	874.8297461393553	259.9749432328355
AHCYL1_4	474.6080139193694	506.4898478662316	504.6693648765768	735.3266176794846
AHCYL2_1	1673.4678570796966	1811.567200778481	3556.6677760206685	2893.4449748926463
AHCYL2_2	871.3803135559623	1119.7076858558466	1226.2214320141618	1403.2120366960578
AHCYL2_3	852.3959929991875	851.0152896680306	863.3599878467057	829.9618480613118
AHCYL2_4	959.657404144965	1126.2611589335984	920.7087793099531	1106.2532103254969
AHDC1_1	1022.3056619823217	851.0152896680306	1256.4598856947832	927.8603622494088
AHDC1_2	580.9202090373082	569.2159473247114	551.5911033465064	1071.4448497252845
AHDC1_3	336.9716898827523	394.1445951047755	671.50221276966	220.8155375575967
AHDC1_4	934.028571393319	1041.0660089228275	2038.488860193611	1534.8311502156107
AHI1_1	1187.4692508262622	1140.3043155287803	1610.979687467585	993.1260383748069
AHI1_2	856.1928571105424	984.8933825420993	1154.2747663602697	492.75585474675523
AHI1_3	1337.445383224783	1359.37755841362	1450.4030713704924	1163.9045575695984
AHI1_4	1399.144425034301	1298.5238798344978	1214.7516737215124	1451.0735325213498
AHNAK_1	1679.163153246729	1481.084915571864	1615.1505086649122	2882.5673622050804
AHNAK_2	1423.8240417581083	1237.6702012553758	964.5024018818875	2526.869427321661
AHNAK_3	1398.1952090064624	1276.0548292822066	1514.0080946297303	1800.2448997922293
AHNAK_4	1362.1249999485901	1259.2030413679881	1700.6523432101174	1645.7827996287872
AHNAK2_1	1800.6628048100874	1599.9836414110719	2415.948178551712	2953.2718446742615
AHNAK2_2	913.1458187808668	974.5950677056325	1652.6878994408557	1976.4622253308041
AHNAK2_3	1125.7702090167443	956.8070693517352	1698.5669326114537	1511.9881635717213
AHNAK2_4	634.0763065962775	428.7843813728911	500.49854367924974	631.9892971476044
AHR_1	1402.941289145656	1273.24619796317	2408.649241456389	2693.2969014414257
AHR_2	1906.0257839001874	1874.2933002369607	2694.350493473294	2880.3918396675667
AHR_3	534.40862367321	773.3098231746901	1213.7089684221805	1015.9690250186962
AHR_4	1021.356445954483	1037.3211671641122	2440.9731057356744	3231.7387294759596
AHRR_1	276.221864101073	220.94566376419718	119.91110942315358	60.914631050371504
AHRR_2	1262.4573170255226	1550.3644881080954	1384.7126375125908	1133.4472420444126
AHRR_3	2151.8727351104208	2255.330949186233	2689.1369669766354	3176.2629047693713
AHRR_4	1733.268466833537	1788.161939786511	1839.3321480212428	1564.2007044720397
AHSA1_1	1259.6096689420065	1256.3944100489516	771.60192150551	1577.2538396971192
AHSA1_2	1149.5006097127127	735.861405587538	1645.3889623455334	827.7863255237985
AHSA1_3	1137.1608013508092	1506.3625974431918	892.5557362279953	1056.2161919626917
AHSA1_4	769.8141985772172	757.3942457001505	808.0966069821219	934.3869298619486
AHSA2_1	1185.5708187705848	1015.7883270514997	1876.8695387971864	1020.3200700937227
AHSA2_2	1094.4460800980657	1378.101767207196	1500.4529257384174	962.6687228496211
AHSA2_3	904.6028745303181	1194.6045210301509	1054.1750576244197	695.0794507354891
AHSA2_4	1082.1062717361622	1307.8859842312859	904.0254945206448	1605.5356326847918
AHSG_1	1476.030923289239	1332.2274556629347	1710.0366909041031	1581.6048847721459
AHSG_2	1118.1764807940344	1204.9028358666176	1836.2040321232473	1446.7224874463232
AHSG_3	1644.9913762445344	1570.961117781029	2555.6706886621687	1527.216821334314
AHSG_4	1312.7657665009758	1821.8655156149478	1333.6200778453342	1393.4221852772482
AHSP_1	817.2749999691541	642.2403616196578	1381.5845216145956	1283.558297132828
AHSP_2	1224.4886759119731	1450.1899710624637	1378.4564057166003	2308.229412301577
AHSP_3	2067.392508632773	2151.411590381886	2058.3002608809143	1324.8932253455803
AHSP_4	982.4385888130947	1068.2161116735126	925.922305806612	719.0101986481351
AICDA_1	1059.3250870680324	941.8277023168744	992.6554449638453	1396.685469083518
AICDA_2	756.5251741874748	710.5837237162104	563.060861639156	732.0633338732147
AICDA_3	929.2824912541253	950.2535962739836	1946.730793852415	1102.9899265192269
AICDA_4	1572.8509581287901	1772.2463623119713	1218.9224949188394	2044.991185262472
AIDA_1	1782.6277002811514	1687.0512123012004	1575.5277072903048	1046.426340543882
AIDA_2	1499.7613239852074	1238.6064116950545	1206.4100313268582	1734.9792236668313
AIDA_3	1531.0854529038857	1126.2611589335984	785.157090396823	475.3516744466491
AIDA_4	759.372822270991	838.8445539522062	671.50221276966	869.1212537365506
AIF1_1	1367.8202961156226	1109.40937101938	1586.9974655829544	2294.0885158077413
AIF1_2	1890.8383274547678	2164.518536537389	1734.018912788734	944.1767812807583
AIF1_3	1141.906881490003	1073.8333743115854	502.5839542779133	1057.3039532314483
AIF1_4	856.1928571105424	715.2647759146045	631.8794113950528	417.70032720254744
AIF1L_1	683.4355400438919	798.5875050460178	937.3920640992615	915.8949882930858
AIF1L_2	1289.984581832846	1285.4169336789946	1192.854862435545	1082.3224624128509
AIF1L_3	1434.2654180643344	1234.8615699363393	1601.595339773599	1224.81918861997
AIF1L_4	1272.8986933317487	906.25170560908	829.9934182680892	1298.786954895421
AIFM1_1	1644.0421602166957	1757.2669952771105	1942.559972655088	1663.1869799288934
AIFM1_2	1318.4610626680083	953.06222759302	1379.499111015932	1576.1660784283627
AIFM1_3	1456.0973867046253	1328.4826139042195	1451.4457766698242	1404.2997979648146
AIFM1_4	1016.6103658152892	1173.0716809175383	967.6305177798828	971.3708129996742
AIFM2_1	2464.164808269366	2498.7456635027215	1224.1360214154984	1777.40191314834
AIFM2_2	2002.845818739739	1823.7379364943054	2107.3074099495075	1869.8616209926538
AIFM2_3	801.1383274958955	743.3510891049684	861.2745772480422	361.1367412272025
AIFM2_4	1020.4072299266443	997.0641182579237	529.6942920605393	543.880634378317
AIFM3_1	899.8567943911244	848.2066583489942	822.6944811727667	868.033492467794
AIFM3_2	1163.7388501302937	1086.9403204670887	696.5271399536225	973.5463355371875
AIFM3_3	593.2600173992117	438.14648576967915	375.3739077594373	554.7582470658833
AIFM3_4	748.931445964765	806.0771885634482	474.43091119595545	698.342734541759
AIG1_1	1270.0510452482326	1439.8916562259967	1011.4241403518172	1364.052631020819
AIG1_2	989.0831010079659	1021.4055896895725	1146.9758292649474	1389.0711402022216
AIG1_3	1294.7306619720398	1078.5144265099793	1052.0896470257562	1308.5768063142307
AIG1_4	377.78797907981806	451.2534319251824	322.195937493517	721.1857211856484
AIM1_1	652.1114111252135	636.623098981585	606.8544842110903	481.8782420591889
AIM1_2	961.5558362006424	812.6306616411998	990.5700343651818	1073.620372262798
AIM1_3	1402.941289145656	1362.1861897326562	1240.8193062048067	1551.14756924696
AIM1_4	724.2518292409577	1055.1091655180094	478.60173239328253	1567.4639882783097
AIM1L_1	1179.8755226035523	815.4392929602361	726.7655936342438	762.5206493984005
AIM1L_2	1052.6805748731613	1133.7508424510288	1172.0007564489097	1436.9326360275136
AIM1L_3	1343.1406793918154	1369.6758732500866	1310.6805612600351	1416.2651719211376
AIM1L_4	1021.356445954483	1011.1072748531057	727.8082989335757	817.9964741049888
AIM2_1	2276.2200347572957	2401.379777776126	1066.687521216401	1843.7553505424946
AIM2_2	600.8537456219217	627.260994584797	677.7584445656506	837.5761769426082
AIM2_3	1656.3819685785993	1711.3926837328493	1227.2641373134936	1537.006672753124
AIM2_4	1437.1130661478505	1609.3457458078599	1691.2679955161314	1341.2096443769299
AIMP1_1	1271.94947730391	1232.052938617303	823.7371864720985	1386.8956176647084
AIMP1_2	956.8097560614488	820.1203451586301	1155.3174716596016	936.5624523994619
AIMP1_3	1145.7037456013577	955.8708589120564	1094.8405642983587	783.1881135047765
AIMP1_4	1085.9031358475172	1000.8089600166389	1264.8015280894374	1107.3409715942535
AIMP2_1	901.7552264468019	1182.4337853143263	1272.1004651847597	888.70095657417
AIMP2_2	591.3615853435343	480.2759555552252	273.1887884249238	303.4853939831009
AIMP2_3	1406.738153257011	1251.7133578505577	1099.0113854956858	1496.7595058091285
AIMP2_4	1436.1638501200118	1613.090587566575	1907.1079924778078	1731.7159398605613
AIP_1	1741.8114110840856	1609.3457458078599	1599.5099291749357	2297.3517996140113
AIP_2	1675.366289135374	1526.9592271161255	3520.1730905440563	3670.1065207848833
AIP_3	908.399738641673	1128.133579812956	1244.9901274021338	1447.81024871508
AIP_4	977.692508673901	1042.0022193625061	1704.8231644074444	526.4764540782108
AIPL1_1	1412.4334494240434	1522.2781749177313	1453.5311872684877	1247.6621752638594
AIPL1_2	999.5244773141919	807.013399003127	401.44154024273155	485.1415258654588
AIPL1_3	1233.0316201625217	1544.7472254700226	1373.2428792199414	1333.5953154956333
AIPL1_4	404.36602785930273	364.1858610350538	870.6589249420282	561.2848146784231
AIRE_1	1036.543902399903	844.461816590279	979.1002760725322	611.3218330412283
AIRE_2	864.735801361091	1072.8971638719065	1632.8764987535521	999.6526059873466
AIRE_3	931.1809233098028	1198.349362788866	1347.175246736647	1621.8520517161414
AIRE_4	1225.4378919398118	1013.9159061721421	1518.1789158270574	1084.497984950364
AJAP1_1	404.36602785930273	376.3565967508782	692.3563187562954	1120.394106819333
AJAP1_2	1121.0241288775505	1300.3963007138555	1828.905095027925	2260.3679164762857
AJAP1_3	1505.4566201522398	1150.602630365247	2234.5174564679837	1814.3857962860657
AJAP1_4	1135.2623692951315	1005.490012215033	1615.1505086649122	898.4908079929797
AJUBA_1	802.0875435237343	734.9251951478592	896.7265574253224	1141.061570925709
AJUBA_2	1243.4729964687479	1363.1224001723351	1821.6061579326026	928.9481235181655
AJUBA_3	1112.481184627002	1110.3455814590586	604.7690736124267	1005.0914123311298
AJUBA_4	1100.1413762650982	1237.6702012553758	1378.4564057166003	2258.192393938772
AK1_1	1308.9689023896208	1218.0097820221208	1919.620456069789	2276.684335507635
AK1_2	1244.4222124965866	1367.803452370729	1227.2641373134936	2165.7326860944586
AK1_3	1211.1996515222306	1076.6420056306217	1160.5309981562602	987.6872320310237
AK1_4	1574.7493901844678	1454.8710232608576	2082.2824827655454	2274.5088129701217
AK2_1	858.0912891662199	1215.2011507030845	646.4772855856976	358.96121868968925
AK2_2	1090.649215986711	956.8070693517352	958.2461700858969	739.6776627545112
AK2_3	494.54155050398293	575.769420402463	432.72269922268464	747.2919916358076
AK2_4	577.1233449259532	813.5668720808786	490.071490685932	381.8042053335785
AK3_1	1494.066027818175	1203.03041498726	1319.0222036546893	1449.9857712525932
AK3_2	2074.0370208276445	2215.0739002800447	3064.5108747360728	2955.4473672117747
AK3_3	792.595383245347	758.3304561398293	925.922305806612	649.3934774477106
AK3_4	702.4198606006668	619.7713110673667	1199.1110942315358	901.7540917992496
AK4_1	1185.5708187705848	1251.7133578505577	717.3812459402579	905.0173756055195
AK4_2	1942.0959929580597	1894.8899299098944	2363.812913585123	1610.974439028575
AK4_3	563.8343205362108	444.69995884743076	229.39516585298946	119.65373956322975
AK4_4	332.2256097435586	317.3753390511137	284.6585467175733	245.8340467389993
AK5_1	1145.7037456013577	1063.5350594751185	1308.5951506613717	701.6060183480289
AK5_2	872.329529583801	793.9064528476238	1401.3959223018992	627.6382520725779
AK5_3	963.4542682563199	1096.3024248638767	1521.3070317250529	973.5463355371875
AK5_4	1885.1430312877353	1626.1975337220783	2433.6741686403516	1553.3230917844735
AK6_1	1121.0241288775505	1332.2274556629347	595.3847259184408	637.4281034913876
AK6_2	388.2293553860442	542.0658445740261	200.1994174716999	263.2382270391054
AK6_3	1004.2705574533857	1350.0154540168319	271.10337782626027	569.9869048284762
AK6_4	537.2562717567262	608.5367857912211	56.306086163915595	352.43465107714945
AK7_1	1460.843466843819	1103.7921083813071	1585.9547602836226	814.7331902987189
AK7_2	2242.99747378294	2122.389066751843	1826.8196844292615	1329.2442704206069
AK7_3	885.6185539735433	843.5256061506002	464.0038582026378	1183.4842604072178
AK7_4	1155.1959058797452	1260.1392518076668	2501.450013096917	1962.3213288369677
AK8_1	1627.905487743437	1888.3364568321429	2675.5817980853226	3208.8957428320705
AK8_2	1075.461759541291	1016.7245374911785	1137.5914815709614	961.5809615808645
AK8_3	871.3803135559623	804.2047676840906	345.13545407881594	800.5922938048826
AK8_4	757.4743902153136	703.09404019878	619.3669478030715	400.2961469024413
AK9_1	1113.4304006548407	989.5744347404933	999.9543820591676	1151.9391836132754
AK9_2	851.4467769713488	745.223509984326	1117.7800808836578	1369.4914373646022
AK9_3	1267.2033971647163	1348.1430331374743	959.2888753852286	1360.7893472145493
AK9_4	576.1741288981144	515.8519522630197	950.9472329905744	427.4901786213572
AKAP1_1	784.0524389947983	903.4430742900436	675.6730339669871	903.9296143367629
AKAP1_2	1213.0980835779083	1143.1129468478168	741.3634678248886	742.9409465607811
AKAP1_3	1413.382665451882	1509.171228762228	1088.5843325023682	1210.6782921261338
AKAP1_4	1663.0264807734704	1784.4170980277959	1875.8268334978548	1073.620372262798
AKAP10_1	1063.1219511793875	818.2479242792725	507.79748077457214	720.0979599168917
AKAP10_2	939.7238675603514	1200.2217836682237	789.3279115941501	1241.1356076513193
AKAP10_3	834.3608884702514	1461.4244963386093	1898.7663500831536	1575.078317159606
AKAP10_4	777.407926799927	836.0359226331698	642.3064643883705	1110.6042554005232
AKAP11_1	875.1771776673172	1328.4826139042195	730.9364148315709	1366.2281535583325
AKAP11_2	1022.3056619823217	1210.5200985046904	669.4168021709964	1255.2765041451557
AKAP11_3	1308.9689023896208	1326.610193024862	1672.4993001281596	866.9457311990374
AKAP11_4	791.6461672175082	933.4018083597651	814.3528387781125	961.5809615808645
AKAP12_1	1260.5588849698452	934.338018799444	1039.577183433775	938.7379749369752
AKAP12_2	578.0725609537919	567.3435264453537	739.2780572262251	962.6687228496211
AKAP12_3	1172.2817943808425	1577.5145908587806	1093.797858999027	1122.5696293568462
AKAP12_4	1442.808362314883	1551.3006985477741	2248.0726253592966	1831.7899765861716
AKAP13_1	730.8963414358288	806.0771885634482	806.0111963834584	1286.821580939098
AKAP13_2	1087.8015679031946	991.4468556198509	1270.015054586096	1456.512338865133
AKAP13_3	1105.8366724321306	1511.9798600812646	1020.8084880458031	1299.8747161641777
AKAP13_4	662.5527874314397	747.0959308636836	922.7941899086167	1261.8030717576955
AKAP14_1	1150.4498257405514	1129.0697902526347	1095.8832695976905	1616.4132453723582
AKAP14_2	590.4123693156955	812.6306616411998	282.57313611890976	650.4812387164671
AKAP14_3	962.5050522284812	906.25170560908	1108.3957331896718	1110.6042554005232
AKAP14_4	804.9351916072505	711.5199341558892	521.3526496658851	666.7976577478166
AKAP17A_1	2378.7353657638796	2266.5654744623785	2350.2577446938103	3017.4497595309026
AKAP17A_2	1076.4109755691297	1021.4055896895725	1227.2641373134936	1228.0824724262397
AKAP17A_3	1065.9695992629038	1444.5727084243908	1247.0755380007972	1994.954166899667
AKAP17A_4	1294.7306619720398	1067.2799012338337	1665.200363032837	1037.724250393829
AKAP2_1	1056.4774389845163	914.6775995661891	848.7621136560609	730.9755726044581
AKAP2_2	1045.0868466504514	846.3342374696366	888.3849150306683	1257.452026682669
AKAP2_3	159.46829267690813	190.05071925479672	145.97874190644782	243.65852420148602
[truncated: 75,442 more rows]
