# Supplementary material for: Loss of NEDD8 in cancer cells causes vulnerability to immune checkpoint blockade in triple-negative breast cancer
Source: Nat Commun. 2024 Apr 27;15:3581. doi: 10.1038/s41467-024-47987-x (PMC11055868; doi:10.1038/s41467-024-47987-x)
Supplement: Supplementary file 5 — Supplementary Data 2 [file 41467_2024_47987_MOESM5_ESM.xlsx]

## Sheet: Raw data
Protein IDs	Majority protein IDs	Fasta headers	Ctrl MDA231	Ctrl MDA231	Ctrl MDA231	Ctrl MDA231	NEDD8 KO MDA231	NEDD8 KO MDA231	NEDD8 KO MDA231	NEDD8 KO MDA231
sp|A1L0T0|ILVBL_HUMAN;tr|M0R026|M0R026_HUMAN;tr|E9PJS0|E9PJS0_HUMAN;tr|M0R1B5|M0R1B5_HUMAN;tr|E9PL44|E9PL44_HUMAN;tr|M0QZX5|M0QZX5_HUMAN;tr|Q59GP4|Q59GP4_HUMAN;tr|E9PNL1|E9PNL1_HUMAN	sp|A1L0T0|ILVBL_HUMAN;tr|M0R026|M0R026_HUMAN;tr|E9PJS0|E9PJS0_HUMAN	sp|A1L0T0|ILVBL_HUMAN Acetolactate synthase-like protein OS=Homo sapiens OX=9606 GN=ILVBL PE=1 SV=2;tr|M0R026|M0R026_HUMAN Acetolactate synthase-like protein OS=Homo sapiens OX=9606 GN=ILVBL PE=1 SV=1;tr|E9PJS0|E9PJS0_HUMAN Acetolactate synthase-like prote	36369000	35371000	38598000	31449000	40192000	33860000	34255000	33731000
sp|A6NHR9|SMHD1_HUMAN;tr|J3KTL8|J3KTL8_HUMAN;tr|J3KTK7|J3KTK7_HUMAN	sp|A6NHR9|SMHD1_HUMAN;tr|J3KTL8|J3KTL8_HUMAN	sp|A6NHR9|SMHD1_HUMAN Structural maintenance of chromosomes flexible hinge domain-containing protein 1 OS=Homo sapiens OX=9606 GN=SMCHD1 PE=1 SV=2;tr|J3KTL8|J3KTL8_HUMAN Structural maintenance of chromosomes flexible hinge domain-containing protein 1 (Frag	20954000	20486000	23399000	26252000	26985000	20464000	23645000	23343000
sp|O00116|ADAS_HUMAN;tr|B7Z3Q4|B7Z3Q4_HUMAN;tr|A0A1B0GWA2|A0A1B0GWA2_HUMAN;tr|Q53SG6|Q53SG6_HUMAN;tr|B7ZAC5|B7ZAC5_HUMAN;tr|B8ZZ81|B8ZZ81_HUMAN;tr|Q53S12|Q53S12_HUMAN;tr|Q53SN7|Q53SN7_HUMAN	sp|O00116|ADAS_HUMAN;tr|B7Z3Q4|B7Z3Q4_HUMAN;tr|A0A1B0GWA2|A0A1B0GWA2_HUMAN;tr|Q53SG6|Q53SG6_HUMAN	sp|O00116|ADAS_HUMAN Alkyldihydroxyacetonephosphate synthase, peroxisomal OS=Homo sapiens OX=9606 GN=AGPS PE=1 SV=1;tr|B7Z3Q4|B7Z3Q4_HUMAN Alkylglycerone-phosphate synthase OS=Homo sapiens OX=9606 PE=2 SV=1;tr|A0A1B0GWA2|A0A1B0GWA2_HUMAN Alkylglycerone-pho	63366000	65800000	77782000	74156000	38623000	62780000	68126000	72118000
sp|O00148|DX39A_HUMAN;tr|B4DX78|B4DX78_HUMAN;tr|A0A024R7H0|A0A024R7H0_HUMAN;tr|K7EQN7|K7EQN7_HUMAN;tr|K7EPJ3|K7EPJ3_HUMAN;tr|K7EN69|K7EN69_HUMAN;tr|Q69YT6|Q69YT6_HUMAN;tr|K7ENP6|K7ENP6_HUMAN;tr|A0A0D9SEM9|A0A0D9SEM9_HUMAN;tr|K7EL56|K7EL56_HUMAN;tr|K7EIL8|K7EIL8_HUMAN;tr|B4DF34|B4DF34_HUMAN;tr|F6SXL5|F6SXL5_HUMAN;tr|A0A286SD68|A0A286SD68_HUMAN;tr|A0A286SD67|A0A286SD67_HUMAN;tr|A0A286SD65|A0A286SD6…	sp|O00148|DX39A_HUMAN;tr|B4DX78|B4DX78_HUMAN;tr|A0A024R7H0|A0A024R7H0_HUMAN;tr|K7EQN7|K7EQN7_HUMAN	sp|O00148|DX39A_HUMAN ATP-dependent RNA helicase DDX39A OS=Homo sapiens OX=9606 GN=DDX39A PE=1 SV=2;tr|B4DX78|B4DX78_HUMAN cDNA FLJ55484, highly similar to ATP-dependent RNA helicase DDX39 (EC 3.6.1.-) OS=Homo sapiens OX=9606 PE=2 SV=1;tr|A0A024R7H0|A0A024	236460000	239940000	240830000	286020000	222650000	209170000	221400000	229240000
sp|O00154|BACH_HUMAN;tr|B4DUX0|B4DUX0_HUMAN;tr|K7EKP8|K7EKP8_HUMAN;tr|B7Z957|B7Z957_HUMAN	sp|O00154|BACH_HUMAN;tr|B4DUX0|B4DUX0_HUMAN;tr|K7EKP8|K7EKP8_HUMAN	sp|O00154|BACH_HUMAN Cytosolic acyl coenzyme A thioester hydrolase OS=Homo sapiens OX=9606 GN=ACOT7 PE=1 SV=3;tr|B4DUX0|B4DUX0_HUMAN cDNA FLJ60167, highly similar to Cytosolic acyl coenzyme A thioester hydrolase(EC 3.1.2.2) OS=Homo sapiens OX=9606 PE=2 SV=	166750000	180220000	150730000	164560000	173040000	156340000	153930000	164250000
sp|O00231|PSD11_HUMAN;tr|B4DTS5|B4DTS5_HUMAN;tr|J3QRY4|J3QRY4_HUMAN;tr|J3QS13|J3QS13_HUMAN;tr|J3KSW3|J3KSW3_HUMAN	sp|O00231|PSD11_HUMAN;tr|B4DTS5|B4DTS5_HUMAN	sp|O00231|PSD11_HUMAN 26S proteasome non-ATPase regulatory subunit 11 OS=Homo sapiens OX=9606 GN=PSMD11 PE=1 SV=3;tr|B4DTS5|B4DTS5_HUMAN cDNA FLJ58882, highly similar to 26S proteasome non-ATPase regulatory subunit 11 OS=Homo sapiens OX=9606 PE=2 SV=1	335120000	329240000	301990000	298090000	367170000	347420000	323080000	331900000
sp|O00429|DNM1L_HUMAN;tr|D3DUW5|D3DUW5_HUMAN;tr|D3DUW6|D3DUW6_HUMAN;tr|B4DYR6|B4DYR6_HUMAN;tr|F8VZ52|F8VZ52_HUMAN;tr|B4DDQ3|B4DDQ3_HUMAN;tr|B4DPZ9|B4DPZ9_HUMAN;tr|F8W1W3|F8W1W3_HUMAN;tr|F8VUJ9|F8VUJ9_HUMAN;tr|H0YI79|H0YI79_HUMAN;tr|F8VR28|F8VR28_HUMAN;tr|F8VYL3|F8VYL3_HUMAN	sp|O00429|DNM1L_HUMAN;tr|D3DUW5|D3DUW5_HUMAN;tr|D3DUW6|D3DUW6_HUMAN;tr|B4DYR6|B4DYR6_HUMAN	sp|O00429|DNM1L_HUMAN Dynamin-1-like protein OS=Homo sapiens OX=9606 GN=DNM1L PE=1 SV=2;tr|D3DUW5|D3DUW5_HUMAN Dynamin 1-like, isoform CRA_c OS=Homo sapiens OX=9606 GN=DNM1L PE=3 SV=1;tr|D3DUW6|D3DUW6_HUMAN Dynamin 1-like, isoform CRA_f OS=Homo sapiens OX=	89761000	83041000	79389000	79803000	84060000	78613000	74654000	82663000
sp|O00461|GOLI4_HUMAN;tr|F8W785|F8W785_HUMAN	sp|O00461|GOLI4_HUMAN;tr|F8W785|F8W785_HUMAN	sp|O00461|GOLI4_HUMAN Golgi integral membrane protein 4 OS=Homo sapiens OX=9606 GN=GOLIM4 PE=1 SV=1;tr|F8W785|F8W785_HUMAN Golgi integral membrane protein 4 OS=Homo sapiens OX=9606 GN=GOLIM4 PE=1 SV=1	9956500	8151900	9151300	9273300	8098100	7523900	9233500	10859000
sp|O00629|IMA3_HUMAN;tr|H7C4F6|H7C4F6_HUMAN	sp|O00629|IMA3_HUMAN	sp|O00629|IMA3_HUMAN Importin subunit alpha-3 OS=Homo sapiens OX=9606 GN=KPNA4 PE=1 SV=1	103610000	102220000	111280000	88211000	98324000	115840000	107030000	103560000
sp|O14579|COPE_HUMAN;tr|M0QXB4|M0QXB4_HUMAN;tr|Q53HJ6|Q53HJ6_HUMAN;tr|Q7Z4Z1|Q7Z4Z1_HUMAN;tr|M0R061|M0R061_HUMAN	sp|O14579|COPE_HUMAN;tr|M0QXB4|M0QXB4_HUMAN;tr|Q53HJ6|Q53HJ6_HUMAN;tr|Q7Z4Z1|Q7Z4Z1_HUMAN	sp|O14579|COPE_HUMAN Coatomer subunit epsilon OS=Homo sapiens OX=9606 GN=COPE PE=1 SV=3;tr|M0QXB4|M0QXB4_HUMAN Coatomer protein complex, subunit epsilon, isoform CRA_g OS=Homo sapiens OX=9606 GN=COPE PE=1 SV=1;tr|Q53HJ6|Q53HJ6_HUMAN Epsilon subunit of coat	186900000	184250000	171950000	167620000	158270000	178200000	160820000	163580000
sp|O14617|AP3D1_HUMAN;tr|Q6PK82|Q6PK82_HUMAN;tr|A0A087WYN6|A0A087WYN6_HUMAN;tr|B3KSV6|B3KSV6_HUMAN;tr|K7ELX8|K7ELX8_HUMAN;tr|B0AZV8|B0AZV8_HUMAN	sp|O14617|AP3D1_HUMAN;tr|Q6PK82|Q6PK82_HUMAN	sp|O14617|AP3D1_HUMAN AP-3 complex subunit delta-1 OS=Homo sapiens OX=9606 GN=AP3D1 PE=1 SV=1;tr|Q6PK82|Q6PK82_HUMAN AP3D1 protein (Fragment) OS=Homo sapiens OX=9606 GN=AP3D1 PE=2 SV=1	62845000	63613000	58981000	53718000	55696000	55258000	63535000	65820000
sp|O14737|PDCD5_HUMAN;tr|K7EQA1|K7EQA1_HUMAN;tr|K7ESJ4|K7ESJ4_HUMAN;tr|Q3HM38|Q3HM38_HUMAN;tr|X6R2P6|X6R2P6_HUMAN;tr|Q59GR9|Q59GR9_HUMAN	sp|O14737|PDCD5_HUMAN;tr|K7EQA1|K7EQA1_HUMAN	sp|O14737|PDCD5_HUMAN Programmed cell death protein 5 OS=Homo sapiens OX=9606 GN=PDCD5 PE=1 SV=3;tr|K7EQA1|K7EQA1_HUMAN Programmed cell death protein 5 OS=Homo sapiens OX=9606 GN=PDCD5 PE=1 SV=1	193100000	180710000	153350000	171170000	223230000	209320000	210510000	206050000
sp|O14744|ANM5_HUMAN;tr|B2RDD7|B2RDD7_HUMAN;tr|B4DV00|B4DV00_HUMAN;tr|G3V580|G3V580_HUMAN;tr|H0YJX6|H0YJX6_HUMAN;tr|G3V2L6|G3V2L6_HUMAN;tr|G3V2X6|G3V2X6_HUMAN;tr|G3V5L5|G3V5L5_HUMAN;tr|C9JSX3|C9JSX3_HUMAN;tr|H0YJ77|H0YJ77_HUMAN;tr|H0YJD3|H0YJD3_HUMAN;tr|G3V507|G3V507_HUMAN;tr|G3V2F5|G3V2F5_HUMAN;tr|G3V5T6|G3V5T6_HUMAN;tr|H7BZ44|H7BZ44_HUMAN	sp|O14744|ANM5_HUMAN;tr|B2RDD7|B2RDD7_HUMAN;tr|B4DV00|B4DV00_HUMAN;tr|G3V580|G3V580_HUMAN	sp|O14744|ANM5_HUMAN Protein arginine N-methyltransferase 5 OS=Homo sapiens OX=9606 GN=PRMT5 PE=1 SV=4;tr|B2RDD7|B2RDD7_HUMAN Protein arginine N-methyltransferase 5 OS=Homo sapiens OX=9606 PE=2 SV=1;tr|B4DV00|B4DV00_HUMAN Protein arginine N-methyltransfera	154190000	143190000	138770000	142540000	187290000	168830000	166840000	160270000
sp|O14929|HAT1_HUMAN	sp|O14929|HAT1_HUMAN	sp|O14929|HAT1_HUMAN Histone acetyltransferase type B catalytic subunit OS=Homo sapiens OX=9606 GN=HAT1 PE=1 SV=1	18035000	18470000	19022000	17194000	24130000	25386000	19706000	23730000
sp|O14950|ML12B_HUMAN	sp|O14950|ML12B_HUMAN	sp|O14950|ML12B_HUMAN Myosin regulatory light chain 12B OS=Homo sapiens OX=9606 GN=MYL12B PE=1 SV=2	995520000	977440000	826760000	989790000	677070000	792120000	729990000	796260000
sp|O14980|XPO1_HUMAN;tr|B7ZB16|B7ZB16_HUMAN;tr|B4DR01|B4DR01_HUMAN;tr|B3KWD0|B3KWD0_HUMAN;tr|C9JKM9|C9JKM9_HUMAN;tr|C9J673|C9J673_HUMAN;tr|C9IZS4|C9IZS4_HUMAN;tr|C9JQ02|C9JQ02_HUMAN;tr|C9JV99|C9JV99_HUMAN;tr|C9IYM2|C9IYM2_HUMAN;tr|F8WF71|F8WF71_HUMAN;tr|C9JF49|C9JF49_HUMAN;tr|H7BZC5|H7BZC5_HUMAN	sp|O14980|XPO1_HUMAN;tr|B7ZB16|B7ZB16_HUMAN;tr|B4DR01|B4DR01_HUMAN;tr|B3KWD0|B3KWD0_HUMAN	sp|O14980|XPO1_HUMAN Exportin-1 OS=Homo sapiens OX=9606 GN=XPO1 PE=1 SV=1;tr|B7ZB16|B7ZB16_HUMAN cDNA, FLJ79380, highly similar to Exportin-1 OS=Homo sapiens OX=9606 PE=2 SV=1;tr|B4DR01|B4DR01_HUMAN cDNA FLJ55480, highly similar to Exportin-1 OS=Homo sapie	377200000	400080000	397140000	409600000	380780000	416330000	405410000	407700000
sp|O15042|SR140_HUMAN;tr|E7ET15|E7ET15_HUMAN;tr|E7EW00|E7EW00_HUMAN;tr|H0Y8D9|H0Y8D9_HUMAN;tr|C9J5L1|C9J5L1_HUMAN;tr|B4DK81|B4DK81_HUMAN;tr|C9JDJ7|C9JDJ7_HUMAN;tr|H7C4V2|H7C4V2_HUMAN;tr|U3KPT1|U3KPT1_HUMAN	sp|O15042|SR140_HUMAN;tr|E7ET15|E7ET15_HUMAN	sp|O15042|SR140_HUMAN U2 snRNP-associated SURP motif-containing protein OS=Homo sapiens OX=9606 GN=U2SURP PE=1 SV=2;tr|E7ET15|E7ET15_HUMAN U2 snRNP-associated SURP motif-containing protein OS=Homo sapiens OX=9606 GN=U2SURP PE=1 SV=1	22581000	20137000	24062000	18473000	22002000	19880000	22652000	27128000
sp|O15173|PGRC2_HUMAN;tr|U3KQM0|U3KQM0_HUMAN;tr|D3DNX8|D3DNX8_HUMAN	sp|O15173|PGRC2_HUMAN;tr|U3KQM0|U3KQM0_HUMAN	sp|O15173|PGRC2_HUMAN Membrane-associated progesterone receptor component 2 OS=Homo sapiens OX=9606 GN=PGRMC2 PE=1 SV=1;tr|U3KQM0|U3KQM0_HUMAN Membrane-associated progesterone receptor component 2 OS=Homo sapiens OX=9606 GN=PGRMC2 PE=1 SV=1	130870000	127810000	120800000	115140000	126580000	111570000	120550000	121060000
sp|O15231|ZN185_HUMAN;tr|Q6MZQ8|Q6MZQ8_HUMAN;tr|H0Y704|H0Y704_HUMAN;tr|B4E2L1|B4E2L1_HUMAN;tr|Q7Z3Q8|Q7Z3Q8_HUMAN;tr|B3KPM4|B3KPM4_HUMAN;tr|H7C1R1|H7C1R1_HUMAN	sp|O15231|ZN185_HUMAN;tr|Q6MZQ8|Q6MZQ8_HUMAN;tr|H0Y704|H0Y704_HUMAN	sp|O15231|ZN185_HUMAN Zinc finger protein 185 OS=Homo sapiens OX=9606 GN=ZNF185 PE=1 SV=3;tr|Q6MZQ8|Q6MZQ8_HUMAN Uncharacterized protein DKFZp686B22130 (Fragment) OS=Homo sapiens OX=9606 GN=DKFZp686B22130 PE=2 SV=1;tr|H0Y704|H0Y704_HUMAN Zinc finger protei	210970000	191790000	202750000	217370000	219670000	219970000	213000000	225340000
sp|O15347|HMGB3_HUMAN;tr|E9PES6|E9PES6_HUMAN;tr|E7ES08|E7ES08_HUMAN;tr|E7EQU1|E7EQU1_HUMAN;tr|Q7Z684|Q7Z684_HUMAN	sp|O15347|HMGB3_HUMAN;tr|E9PES6|E9PES6_HUMAN;tr|E7ES08|E7ES08_HUMAN;tr|E7EQU1|E7EQU1_HUMAN;tr|Q7Z684|Q7Z684_HUMAN	sp|O15347|HMGB3_HUMAN High mobility group protein B3 OS=Homo sapiens OX=9606 GN=HMGB3 PE=1 SV=4;tr|E9PES6|E9PES6_HUMAN High mobility group protein B3 (Fragment) OS=Homo sapiens OX=9606 GN=HMGB3 PE=1 SV=1;tr|E7ES08|E7ES08_HUMAN High mobility group protein B	66266000	59783000	65326000	78158000	42145000	38324000	49657000	57334000
sp|O15371|EIF3D_HUMAN;tr|B4E1K8|B4E1K8_HUMAN;tr|B0QYA5|B0QYA5_HUMAN;tr|B0QYA8|B0QYA8_HUMAN;tr|B0QYA6|B0QYA6_HUMAN;tr|B0QYA4|B0QYA4_HUMAN	sp|O15371|EIF3D_HUMAN;tr|B4E1K8|B4E1K8_HUMAN	sp|O15371|EIF3D_HUMAN Eukaryotic translation initiation factor 3 subunit D OS=Homo sapiens OX=9606 GN=EIF3D PE=1 SV=1;tr|B4E1K8|B4E1K8_HUMAN Eukaryotic translation initiation factor 3 subunit D OS=Homo sapiens OX=9606 GN=EIF3D PE=2 SV=1	267580000	281860000	283610000	312170000	245210000	266310000	280200000	286250000
sp|O15400|STX7_HUMAN;tr|B4DH37|B4DH37_HUMAN	sp|O15400|STX7_HUMAN;tr|B4DH37|B4DH37_HUMAN	sp|O15400|STX7_HUMAN Syntaxin-7 OS=Homo sapiens OX=9606 GN=STX7 PE=1 SV=4;tr|B4DH37|B4DH37_HUMAN cDNA FLJ53760, highly similar to Syntaxin-7 OS=Homo sapiens OX=9606 PE=2 SV=1	36968000	34051000	35577000	35268000	40897000	34371000	32517000	38239000
sp|O43143|DHX15_HUMAN;tr|B4E0S6|B4E0S6_HUMAN	sp|O43143|DHX15_HUMAN;tr|B4E0S6|B4E0S6_HUMAN	sp|O43143|DHX15_HUMAN Pre-mRNA-splicing factor ATP-dependent RNA helicase DHX15 OS=Homo sapiens OX=9606 GN=DHX15 PE=1 SV=2;tr|B4E0S6|B4E0S6_HUMAN cDNA FLJ55635, highly similar to pre-mRNA-splicing factorATP-dependent RNA helicase DHX15 (EC 3.6.1.-) OS=Homo	217480000	226930000	233750000	233020000	208880000	221910000	225250000	219250000
sp|O43290|SNUT1_HUMAN;tr|B4DDH9|B4DDH9_HUMAN;tr|E9PQI8|E9PQI8_HUMAN;tr|B4DP43|B4DP43_HUMAN;tr|B4DMR4|B4DMR4_HUMAN	sp|O43290|SNUT1_HUMAN;tr|B4DDH9|B4DDH9_HUMAN	sp|O43290|SNUT1_HUMAN U4/U6.U5 tri-snRNP-associated protein 1 OS=Homo sapiens OX=9606 GN=SART1 PE=1 SV=1;tr|B4DDH9|B4DDH9_HUMAN cDNA FLJ53820, highly similar to U4/U6.U5 tri-snRNP-associated protein 1 OS=Homo sapiens OX=9606 PE=2 SV=1	38973000	38175000	44298000	39688000	42649000	46460000	43457000	43163000
sp|O43390|HNRPR_HUMAN;tr|B2R7W4|B2R7W4_HUMAN;tr|B4DMB1|B4DMB1_HUMAN;tr|Q0VGD6|Q0VGD6_HUMAN;tr|Q6MZS5|Q6MZS5_HUMAN;tr|B4DT28|B4DT28_HUMAN;tr|B4DMD1|B4DMD1_HUMAN;tr|A0A286YEZ8|A0A286YEZ8_HUMAN;tr|Q7Z334|Q7Z334_HUMAN	sp|O43390|HNRPR_HUMAN;tr|B2R7W4|B2R7W4_HUMAN;tr|B4DMB1|B4DMB1_HUMAN;tr|Q0VGD6|Q0VGD6_HUMAN;tr|Q6MZS5|Q6MZS5_HUMAN;tr|B4DT28|B4DT28_HUMAN;tr|B4DMD1|B4DMD1_HUMAN	sp|O43390|HNRPR_HUMAN Heterogeneous nuclear ribonucleoprotein R OS=Homo sapiens OX=9606 GN=HNRNPR PE=1 SV=1;tr|B2R7W4|B2R7W4_HUMAN cDNA, FLJ93632, highly similar to Homo sapiens heterogeneous nuclear ribonucleoprotein R (HNRPR), mRNA OS=Homo sapiens OX=960	364170000	383750000	393410000	418580000	300010000	325970000	359380000	355730000
sp|O43491|E41L2_HUMAN;tr|E9PHY5|E9PHY5_HUMAN;tr|E9PK52|E9PK52_HUMAN;tr|Q6R5J7|Q6R5J7_HUMAN;tr|E9PII3|E9PII3_HUMAN;tr|Q59FD8|Q59FD8_HUMAN;tr|Q6ZSX4|Q6ZSX4_HUMAN;tr|B4DJ76|B4DJ76_HUMAN;tr|I6L9B1|I6L9B1_HUMAN;tr|E9PMV8|E9PMV8_HUMAN;tr|H0Y5B0|H0Y5B0_HUMAN;tr|O60642|O60642_HUMAN;tr|Q9UG62|Q9UG62_HUMAN;tr|E9PJP4|E9PJP4_HUMAN;tr|E9PQN0|E9PQN0_HUMAN;tr|E9PRG1|E9PRG1_HUMAN;tr|E9PIG0|E9PIG0_HUMAN;tr|E9PQD2…	sp|O43491|E41L2_HUMAN;tr|E9PHY5|E9PHY5_HUMAN;tr|E9PK52|E9PK52_HUMAN;tr|Q6R5J7|Q6R5J7_HUMAN;tr|E9PII3|E9PII3_HUMAN	sp|O43491|E41L2_HUMAN Band 4.1-like protein 2 OS=Homo sapiens OX=9606 GN=EPB41L2 PE=1 SV=1;tr|E9PHY5|E9PHY5_HUMAN Band 4.1-like protein 2 OS=Homo sapiens OX=9606 GN=EPB41L2 PE=1 SV=1;tr|E9PK52|E9PK52_HUMAN Band 4.1-like protein 2 OS=Homo sapiens OX=9606 GN	105010000	105420000	114160000	103850000	108180000	101700000	93448000	106100000
sp|O43493|TGON2_HUMAN	sp|O43493|TGON2_HUMAN	sp|O43493|TGON2_HUMAN Trans-Golgi network integral membrane protein 2 OS=Homo sapiens OX=9606 GN=TGOLN2 PE=1 SV=3	10164000	11890000	11444000	8769200	8975800	9570300	10888000	9453500
sp|O43592|XPOT_HUMAN;tr|A8KA19|A8KA19_HUMAN;tr|A0A024RB67|A0A024RB67_HUMAN;tr|F5GYW6|F5GYW6_HUMAN;tr|F5GZM3|F5GZM3_HUMAN;tr|F8WDU6|F8WDU6_HUMAN	sp|O43592|XPOT_HUMAN;tr|A8KA19|A8KA19_HUMAN;tr|A0A024RB67|A0A024RB67_HUMAN	sp|O43592|XPOT_HUMAN Exportin-T OS=Homo sapiens OX=9606 GN=XPOT PE=1 SV=2;tr|A8KA19|A8KA19_HUMAN cDNA FLJ75831, highly similar to Homo sapiens exportin, tRNA (nuclear export receptor for tRNAs) (XPOT), mRNA OS=Homo sapiens OX=9606 PE=2 SV=1;tr|A0A024RB67|A	24698000	26582000	21436000	41073000	40688000	32586000	31879000	33101000
sp|O43598|DNPH1_HUMAN;tr|H0Y8X4|H0Y8X4_HUMAN	sp|O43598|DNPH1_HUMAN;tr|H0Y8X4|H0Y8X4_HUMAN	sp|O43598|DNPH1_HUMAN 2-deoxynucleoside 5-phosphate N-hydrolase 1 OS=Homo sapiens OX=9606 GN=DNPH1 PE=1 SV=1;tr|H0Y8X4|H0Y8X4_HUMAN 2-deoxynucleoside 5-phosphate N-hydrolase 1 (Fragment) OS=Homo sapiens OX=9606 GN=DNPH1 PE=1 SV=1	22468000	24561000	26823000	26082000	20545000	23411000	27338000	20414000
sp|O43660|PLRG1_HUMAN;tr|D6RA26|D6RA26_HUMAN;tr|H0YA24|H0YA24_HUMAN;tr|B7Z982|B7Z982_HUMAN	sp|O43660|PLRG1_HUMAN	sp|O43660|PLRG1_HUMAN Pleiotropic regulator 1 OS=Homo sapiens OX=9606 GN=PLRG1 PE=1 SV=1	36801000	43159000	59964000	61698000	49768000	46411000	62384000	64499000
sp|O43665|RGS10_HUMAN	sp|O43665|RGS10_HUMAN	sp|O43665|RGS10_HUMAN Regulator of G-protein signaling 10 OS=Homo sapiens OX=9606 GN=RGS10 PE=1 SV=2	41868000	37694000	39366000	31185000	66716000	66846000	57439000	63202000
sp|O43670|ZN207_HUMAN;tr|J3QRS9|J3QRS9_HUMAN;tr|Q59G94|Q59G94_HUMAN;tr|X6R4W8|X6R4W8_HUMAN;tr|Q8N395|Q8N395_HUMAN;tr|J3KS31|J3KS31_HUMAN;tr|B4DQT7|B4DQT7_HUMAN;tr|J3QS27|J3QS27_HUMAN;tr|J3KTL1|J3KTL1_HUMAN;tr|J3KRB6|J3KRB6_HUMAN;tr|J3KRW6|J3KRW6_HUMAN;tr|H0Y3M2|H0Y3M2_HUMAN	sp|O43670|ZN207_HUMAN;tr|J3QRS9|J3QRS9_HUMAN;tr|Q59G94|Q59G94_HUMAN;tr|X6R4W8|X6R4W8_HUMAN;tr|Q8N395|Q8N395_HUMAN;tr|J3KS31|J3KS31_HUMAN;tr|B4DQT7|B4DQT7_HUMAN	sp|O43670|ZN207_HUMAN BUB3-interacting and GLEBS motif-containing protein ZNF207 OS=Homo sapiens OX=9606 GN=ZNF207 PE=1 SV=1;tr|J3QRS9|J3QRS9_HUMAN BUB3-interacting and GLEBS motif-containing protein ZNF207 OS=Homo sapiens OX=9606 GN=ZNF207 PE=1 SV=1;tr|Q5	48840000	47708000	56471000	52225000	51810000	51283000	53487000	48777000
sp|O43681|ASNA_HUMAN;tr|A0A087WXS7|A0A087WXS7_HUMAN;tr|B4DEE5|B4DEE5_HUMAN;tr|K7ERW9|K7ERW9_HUMAN	sp|O43681|ASNA_HUMAN;tr|A0A087WXS7|A0A087WXS7_HUMAN;tr|B4DEE5|B4DEE5_HUMAN;tr|K7ERW9|K7ERW9_HUMAN	sp|O43681|ASNA_HUMAN ATPase ASNA1 OS=Homo sapiens OX=9606 GN=ASNA1 PE=1 SV=2;tr|A0A087WXS7|A0A087WXS7_HUMAN ATPase ASNA1 OS=Homo sapiens OX=9606 GN=ASNA1 PE=1 SV=1;tr|B4DEE5|B4DEE5_HUMAN Arsenical pump-driving ATPase OS=Homo sapiens OX=9606 PE=2 SV=1;tr|K7	137230000	129900000	128750000	144650000	121990000	125830000	142040000	131160000
sp|O43719|HTSF1_HUMAN;tr|B4DRS4|B4DRS4_HUMAN;tr|Q5H919|Q5H919_HUMAN;tr|Q5H918|Q5H918_HUMAN	sp|O43719|HTSF1_HUMAN;tr|B4DRS4|B4DRS4_HUMAN	sp|O43719|HTSF1_HUMAN HIV Tat-specific factor 1 OS=Homo sapiens OX=9606 GN=HTATSF1 PE=1 SV=1;tr|B4DRS4|B4DRS4_HUMAN cDNA FLJ60139, highly similar to Homo sapiens HIV TAT specific factor 1 (HTATSF1), mRNA OS=Homo sapiens OX=9606 PE=2 SV=1	22651000	24451000	24044000	26685000	21558000	19218000	21506000	21285000
sp|O43747|AP1G1_HUMAN;tr|Q8IY97|Q8IY97_HUMAN;tr|A0A140VJE7|A0A140VJE7_HUMAN;tr|B3KXW5|B3KXW5_HUMAN;tr|B4DS96|B4DS96_HUMAN;tr|B4DDL1|B4DDL1_HUMAN;tr|H3BNN2|H3BNN2_HUMAN;tr|H3BN71|H3BN71_HUMAN;tr|B4DGE1|B4DGE1_HUMAN;tr|H3BR36|H3BR36_HUMAN;tr|H3BUN9|H3BUN9_HUMAN;tr|H3BNR4|H3BNR4_HUMAN;tr|B3KNW1|B3KNW1_HUMAN	sp|O43747|AP1G1_HUMAN;tr|Q8IY97|Q8IY97_HUMAN;tr|A0A140VJE7|A0A140VJE7_HUMAN;tr|B3KXW5|B3KXW5_HUMAN;tr|B4DS96|B4DS96_HUMAN;tr|B4DDL1|B4DDL1_HUMAN	sp|O43747|AP1G1_HUMAN AP-1 complex subunit gamma-1 OS=Homo sapiens OX=9606 GN=AP1G1 PE=1 SV=5;tr|Q8IY97|Q8IY97_HUMAN AP-1 complex subunit gamma OS=Homo sapiens OX=9606 GN=AP1G1 PE=2 SV=1;tr|A0A140VJE7|A0A140VJE7_HUMAN AP-1 complex subunit gamma OS=Homo sap	37561000	42972000	45943000	45465000	29340000	35321000	41152000	40219000
sp|O43765|SGTA_HUMAN;tr|B4DEA6|B4DEA6_HUMAN;tr|K7EMD6|K7EMD6_HUMAN	sp|O43765|SGTA_HUMAN;tr|B4DEA6|B4DEA6_HUMAN	sp|O43765|SGTA_HUMAN Small glutamine-rich tetratricopeptide repeat-containing protein alpha OS=Homo sapiens OX=9606 GN=SGTA PE=1 SV=1;tr|B4DEA6|B4DEA6_HUMAN cDNA FLJ56566, highly similar to Small glutamine-rich tetratricopeptiderepeat-containing protein A	26451000	25473000	25267000	25813000	31425000	33332000	26742000	30251000
sp|O43768|ENSA_HUMAN;tr|A6NMQ3|A6NMQ3_HUMAN;tr|Q5T5H1|Q5T5H1_HUMAN;tr|A0A1W2PRU0|A0A1W2PRU0_HUMAN;tr|H3BQ52|H3BQ52_HUMAN;tr|H3BTD3|H3BTD3_HUMAN;tr|H3BMD8|H3BMD8_HUMAN	sp|O43768|ENSA_HUMAN;tr|A6NMQ3|A6NMQ3_HUMAN;tr|Q5T5H1|Q5T5H1_HUMAN;tr|A0A1W2PRU0|A0A1W2PRU0_HUMAN	sp|O43768|ENSA_HUMAN Alpha-endosulfine OS=Homo sapiens OX=9606 GN=ENSA PE=1 SV=1;tr|A6NMQ3|A6NMQ3_HUMAN Alpha-endosulfine OS=Homo sapiens OX=9606 GN=ENSA PE=1 SV=2;tr|Q5T5H1|Q5T5H1_HUMAN Alpha-endosulfine OS=Homo sapiens OX=9606 GN=ENSA PE=1 SV=1;tr|A0A1W2	29220000	33617000	39981000	45952000	37264000	41946000	40400000	40104000
sp|O43776|SYNC_HUMAN;tr|B4DN60|B4DN60_HUMAN;tr|B4DGT6|B4DGT6_HUMAN;tr|K7EIU7|K7EIU7_HUMAN;tr|K7EPK2|K7EPK2_HUMAN;tr|K7EQ35|K7EQ35_HUMAN;tr|B4DF91|B4DF91_HUMAN;tr|K7EMQ6|K7EMQ6_HUMAN;tr|K7EJ19|K7EJ19_HUMAN	sp|O43776|SYNC_HUMAN;tr|B4DN60|B4DN60_HUMAN	sp|O43776|SYNC_HUMAN Asparagine--tRNA ligase, cytoplasmic OS=Homo sapiens OX=9606 GN=NARS PE=1 SV=1;tr|B4DN60|B4DN60_HUMAN cDNA FLJ52703, highly similar to Asparaginyl-tRNA synthetase, cytoplasmic (EC6.1.1.22) OS=Homo sapiens OX=9606 PE=2 SV=1	212570000	227580000	212590000	191850000	223860000	215000000	217080000	220850000
sp|O43847|NRDC_HUMAN;tr|B1AKJ5|B1AKJ5_HUMAN;tr|B4DRI0|B4DRI0_HUMAN;tr|Q6UUU9|Q6UUU9_HUMAN;tr|G3V1R5|G3V1R5_HUMAN;tr|Q96L67|Q96L67_HUMAN;tr|F5H7V1|F5H7V1_HUMAN;tr|H0Y5G9|H0Y5G9_HUMAN;tr|B4DYV0|B4DYV0_HUMAN	sp|O43847|NRDC_HUMAN;tr|B1AKJ5|B1AKJ5_HUMAN;tr|B4DRI0|B4DRI0_HUMAN;tr|Q6UUU9|Q6UUU9_HUMAN;tr|G3V1R5|G3V1R5_HUMAN;tr|Q96L67|Q96L67_HUMAN;tr|F5H7V1|F5H7V1_HUMAN;tr|H0Y5G9|H0Y5G9_HUMAN;tr|B4DYV0|B4DYV0_HUMAN	sp|O43847|NRDC_HUMAN Nardilysin OS=Homo sapiens OX=9606 GN=NRDC PE=1 SV=2;tr|B1AKJ5|B1AKJ5_HUMAN Nardilysin OS=Homo sapiens OX=9606 GN=NRDC PE=1 SV=1;tr|B4DRI0|B4DRI0_HUMAN cDNA FLJ60831, highly similar to Nardilysin (EC 3.4.24.61) OS=Homo sapiens OX=9606	26215000	31785000	41702000	32881000	19618000	26301000	29781000	27236000
sp|O60220|TIM8A_HUMAN	sp|O60220|TIM8A_HUMAN	sp|O60220|TIM8A_HUMAN Mitochondrial import inner membrane translocase subunit Tim8 A OS=Homo sapiens OX=9606 GN=TIMM8A PE=1 SV=1	37958000	35956000	35578000	39079000	40751000	42285000	32521000	39361000
sp|O60493|SNX3_HUMAN	sp|O60493|SNX3_HUMAN	sp|O60493|SNX3_HUMAN Sorting nexin-3 OS=Homo sapiens OX=9606 GN=SNX3 PE=1 SV=3	76967000	64663000	68770000	64360000	66817000	76911000	70545000	62991000
sp|O60502|OGA_HUMAN;tr|B3KMK2|B3KMK2_HUMAN;tr|H7C3X0|H7C3X0_HUMAN;tr|B4DYV7|B4DYV7_HUMAN	sp|O60502|OGA_HUMAN	sp|O60502|OGA_HUMAN Protein O-GlcNAcase OS=Homo sapiens OX=9606 GN=MGEA5 PE=1 SV=2	62058000	56275000	67102000	61575000	58149000	62406000	57545000	62809000
sp|O60506|HNRPQ_HUMAN;tr|Q05CK9|Q05CK9_HUMAN;tr|B2R8Z8|B2R8Z8_HUMAN;tr|F6UXX1|F6UXX1_HUMAN	sp|O60506|HNRPQ_HUMAN;tr|Q05CK9|Q05CK9_HUMAN;tr|B2R8Z8|B2R8Z8_HUMAN	sp|O60506|HNRPQ_HUMAN Heterogeneous nuclear ribonucleoprotein Q OS=Homo sapiens OX=9606 GN=SYNCRIP PE=1 SV=2;tr|Q05CK9|Q05CK9_HUMAN SYNCRIP protein (Fragment) OS=Homo sapiens OX=9606 GN=SYNCRIP PE=2 SV=1;tr|B2R8Z8|B2R8Z8_HUMAN cDNA, FLJ94136, highly simila	939210000	920830000	873160000	950580000	872410000	994380000	939270000	922080000
sp|O60664|PLIN3_HUMAN;tr|A0A140VJN8|A0A140VJN8_HUMAN;tr|K7ERZ3|K7ERZ3_HUMAN;tr|K7EL96|K7EL96_HUMAN;tr|K7ER39|K7ER39_HUMAN;tr|K7EJD0|K7EJD0_HUMAN	sp|O60664|PLIN3_HUMAN;tr|A0A140VJN8|A0A140VJN8_HUMAN;tr|K7ERZ3|K7ERZ3_HUMAN	sp|O60664|PLIN3_HUMAN Perilipin-3 OS=Homo sapiens OX=9606 GN=PLIN3 PE=1 SV=3;tr|A0A140VJN8|A0A140VJN8_HUMAN Perilipin OS=Homo sapiens OX=9606 PE=2 SV=1;tr|K7ERZ3|K7ERZ3_HUMAN Perilipin-3 (Fragment) OS=Homo sapiens OX=9606 GN=PLIN3 PE=1 SV=1	536260000	511140000	491600000	526850000	515330000	530960000	477140000	499670000
sp|O60701|UGDH_HUMAN;tr|Q9NQ81|Q9NQ81_HUMAN;tr|Q9NQ82|Q9NQ82_HUMAN;tr|E7ER83|E7ER83_HUMAN;tr|E7ETF4|E7ETF4_HUMAN;tr|E7EV97|E7EV97_HUMAN;tr|E7ER95|E7ER95_HUMAN;tr|D6RHF4|D6RHF4_HUMAN;tr|Q9NY20|Q9NY20_HUMAN;tr|E9PBD2|E9PBD2_HUMAN	sp|O60701|UGDH_HUMAN	sp|O60701|UGDH_HUMAN UDP-glucose 6-dehydrogenase OS=Homo sapiens OX=9606 GN=UGDH PE=1 SV=1	74102000	74897000	75484000	71258000	74466000	84935000	84987000	87273000
sp|O60832|DKC1_HUMAN;tr|C9IYT0|C9IYT0_HUMAN;tr|U5UA77|U5UA77_HUMAN;tr|U5U7S7|U5U7S7_HUMAN;tr|H7C0M1|H7C0M1_HUMAN;tr|H7C2Q9|H7C2Q9_HUMAN;tr|H7C2Q2|H7C2Q2_HUMAN;tr|U5U768|U5U768_HUMAN;tr|H7BZF2|H7BZF2_HUMAN	sp|O60832|DKC1_HUMAN;tr|C9IYT0|C9IYT0_HUMAN;tr|U5UA77|U5UA77_HUMAN	sp|O60832|DKC1_HUMAN H/ACA ribonucleoprotein complex subunit 4 OS=Homo sapiens OX=9606 GN=DKC1 PE=1 SV=3;tr|C9IYT0|C9IYT0_HUMAN H/ACA ribonucleoprotein complex subunit 4 (Fragment) OS=Homo sapiens OX=9606 GN=DKC1 PE=1 SV=8;tr|U5UA77|U5UA77_HUMAN Dyskeratos	39172000	39462000	51310000	42963000	41376000	37120000	40780000	44453000
sp|O60869|EDF1_HUMAN	sp|O60869|EDF1_HUMAN	sp|O60869|EDF1_HUMAN Endothelial differentiation-related factor 1 OS=Homo sapiens OX=9606 GN=EDF1 PE=1 SV=1	100560000	101290000	101120000	104500000	107630000	95643000	101020000	111450000
sp|O60888|CUTA_HUMAN;tr|C9IZG4|C9IZG4_HUMAN;tr|C9IZQ5|C9IZQ5_HUMAN	sp|O60888|CUTA_HUMAN;tr|C9IZG4|C9IZG4_HUMAN	sp|O60888|CUTA_HUMAN Protein CutA OS=Homo sapiens OX=9606 GN=CUTA PE=1 SV=2;tr|C9IZG4|C9IZG4_HUMAN Protein CutA OS=Homo sapiens OX=9606 GN=CUTA PE=1 SV=1	85170000	93921000	83273000	71926000	110520000	96086000	124750000	106960000
sp|O75367|H2AY_HUMAN;tr|B4DJC3|B4DJC3_HUMAN;tr|Q59FH0|Q59FH0_HUMAN;tr|D6RCF2|D6RCF2_HUMAN;tr|Q9HA11|Q9HA11_HUMAN;tr|A0A024QZP6|A0A024QZP6_HUMAN;sp|Q9P0M6|H2AW_HUMAN;tr|Q5SQT3|Q5SQT3_HUMAN	sp|O75367|H2AY_HUMAN;tr|B4DJC3|B4DJC3_HUMAN;tr|Q59FH0|Q59FH0_HUMAN	sp|O75367|H2AY_HUMAN Core histone macro-H2A.1 OS=Homo sapiens OX=9606 GN=H2AFY PE=1 SV=4;tr|B4DJC3|B4DJC3_HUMAN Histone H2A OS=Homo sapiens OX=9606 GN=H2AFY PE=1 SV=1;tr|Q59FH0|Q59FH0_HUMAN H2A histone family, member Y isoform 2 variant (Fragment) OS=Homo	198840000	219460000	247580000	267820000	159580000	184110000	220120000	179920000
sp|O75369|FLNB_HUMAN;tr|A0A024R321|A0A024R321_HUMAN;tr|E7EN95|E7EN95_HUMAN;tr|Q68CT4|Q68CT4_HUMAN;tr|A0A0A0MT44|A0A0A0MT44_HUMAN;tr|H7C5L4|H7C5L4_HUMAN;tr|A0A0C4DGA1|A0A0C4DGA1_HUMAN	sp|O75369|FLNB_HUMAN;tr|A0A024R321|A0A024R321_HUMAN;tr|E7EN95|E7EN95_HUMAN;tr|Q68CT4|Q68CT4_HUMAN	sp|O75369|FLNB_HUMAN Filamin-B OS=Homo sapiens OX=9606 GN=FLNB PE=1 SV=2;tr|A0A024R321|A0A024R321_HUMAN Filamin B, beta (Actin binding protein 278), isoform CRA_a OS=Homo sapiens OX=9606 GN=FLNB PE=4 SV=1;tr|E7EN95|E7EN95_HUMAN Filamin-B OS=Homo sapiens OX	7413100000	7340700000	7061100000	6880900000	5762500000	5772100000	5699100000	5868800000
sp|O75396|SC22B_HUMAN;tr|A0A087X1A9|A0A087X1A9_HUMAN;tr|I1VE16|I1VE16_HUMAN;tr|I1VE20|I1VE20_HUMAN	sp|O75396|SC22B_HUMAN	sp|O75396|SC22B_HUMAN Vesicle-trafficking protein SEC22b OS=Homo sapiens OX=9606 GN=SEC22B PE=1 SV=4	169480000	153470000	165620000	170860000	149390000	150860000	137510000	151550000
sp|O75400|PR40A_HUMAN;tr|B4DPY2|B4DPY2_HUMAN;tr|Q4ZG51|Q4ZG51_HUMAN;tr|H0YG38|H0YG38_HUMAN;tr|Q05C41|Q05C41_HUMAN;tr|F5H578|F5H578_HUMAN;tr|H7C2N3|H7C2N3_HUMAN	sp|O75400|PR40A_HUMAN;tr|B4DPY2|B4DPY2_HUMAN	sp|O75400|PR40A_HUMAN Pre-mRNA-processing factor 40 homolog A OS=Homo sapiens OX=9606 GN=PRPF40A PE=1 SV=2;tr|B4DPY2|B4DPY2_HUMAN cDNA FLJ59286, highly similar to Pre-mRNA-processing factor 40 homolog A (Fragment) OS=Homo sapiens OX=9606 PE=2 SV=1	44474000	36285000	40216000	37319000	55363000	80800000	43029000	46924000
sp|O75436|VP26A_HUMAN;tr|B4DLT1|B4DLT1_HUMAN;tr|A8K3C1|A8K3C1_HUMAN;tr|S4R3Q6|S4R3Q6_HUMAN;tr|S4R2Y3|S4R2Y3_HUMAN	sp|O75436|VP26A_HUMAN;tr|B4DLT1|B4DLT1_HUMAN;tr|A8K3C1|A8K3C1_HUMAN;tr|S4R3Q6|S4R3Q6_HUMAN	sp|O75436|VP26A_HUMAN Vacuolar protein sorting-associated protein 26A OS=Homo sapiens OX=9606 GN=VPS26A PE=1 SV=2;tr|B4DLT1|B4DLT1_HUMAN cDNA FLJ59716, highly similar to Vacuolar protein sorting 26A OS=Homo sapiens OX=9606 PE=2 SV=1;tr|A8K3C1|A8K3C1_HUMAN	47159000	48207000	47060000	50946000	44879000	42818000	42279000	44493000
sp|O75475|PSIP1_HUMAN;tr|Q05CM9|Q05CM9_HUMAN;tr|Q8N4N4|Q8N4N4_HUMAN	sp|O75475|PSIP1_HUMAN;tr|Q05CM9|Q05CM9_HUMAN	sp|O75475|PSIP1_HUMAN PC4 and SFRS1-interacting protein OS=Homo sapiens OX=9606 GN=PSIP1 PE=1 SV=1;tr|Q05CM9|Q05CM9_HUMAN PSIP1 protein (Fragment) OS=Homo sapiens OX=9606 GN=PSIP1 PE=2 SV=1	40516000	36803000	51925000	49509000	45371000	43736000	57168000	49275000
sp|O75489|NDUS3_HUMAN;tr|Q53FM7|Q53FM7_HUMAN;tr|Q9UF24|Q9UF24_HUMAN;tr|E9PS48|E9PS48_HUMAN;tr|G3V194|G3V194_HUMAN	sp|O75489|NDUS3_HUMAN;tr|Q53FM7|Q53FM7_HUMAN;tr|Q9UF24|Q9UF24_HUMAN	sp|O75489|NDUS3_HUMAN NADH dehydrogenase [ubiquinone] iron-sulfur protein 3, mitochondrial OS=Homo sapiens OX=9606 GN=NDUFS3 PE=1 SV=1;tr|Q53FM7|Q53FM7_HUMAN NADH dehydrogenase (Ubiquinone) Fe-S protein 3, 30kDa (NADH-coenzyme Q reductase) variant (Fragmen	26490000	23308000	23701000	26286000	28376000	31016000	25293000	25781000
sp|O75506|HSBP1_HUMAN	sp|O75506|HSBP1_HUMAN	sp|O75506|HSBP1_HUMAN Heat shock factor-binding protein 1 OS=Homo sapiens OX=9606 GN=HSBP1 PE=1 SV=1	27562000	32525000	28952000	36365000	40045000	39567000	39409000	37747000
sp|O75533|SF3B1_HUMAN;tr|Q7Z497|Q7Z497_HUMAN;tr|A0JLT9|A0JLT9_HUMAN;tr|Q32Q20|Q32Q20_HUMAN;tr|A0PJH5|A0PJH5_HUMAN;tr|H7C341|H7C341_HUMAN;tr|A8K355|A8K355_HUMAN;tr|B4DGZ4|B4DGZ4_HUMAN;tr|Q9NTB4|Q9NTB4_HUMAN;tr|F8WC19|F8WC19_HUMAN	sp|O75533|SF3B1_HUMAN;tr|Q7Z497|Q7Z497_HUMAN	sp|O75533|SF3B1_HUMAN Splicing factor 3B subunit 1 OS=Homo sapiens OX=9606 GN=SF3B1 PE=1 SV=3;tr|Q7Z497|Q7Z497_HUMAN SF3B1 protein (Fragment) OS=Homo sapiens OX=9606 GN=SF3B1 PE=2 SV=1	229380000	252590000	274700000	274320000	236320000	211730000	256160000	249790000
sp|O75643|U520_HUMAN;tr|A4FU77|A4FU77_HUMAN;tr|Q9H8B9|Q9H8B9_HUMAN;tr|B4E150|B4E150_HUMAN;tr|B4E0P5|B4E0P5_HUMAN;tr|Q9UNV9|Q9UNV9_HUMAN;tr|A2RRQ7|A2RRQ7_HUMAN;tr|Q7L5W4|Q7L5W4_HUMAN;tr|Q9P172|Q9P172_HUMAN;tr|Q5ZF01|Q5ZF01_HUMAN	sp|O75643|U520_HUMAN;tr|A4FU77|A4FU77_HUMAN	sp|O75643|U520_HUMAN U5 small nuclear ribonucleoprotein 200 kDa helicase OS=Homo sapiens OX=9606 GN=SNRNP200 PE=1 SV=2;tr|A4FU77|A4FU77_HUMAN SNRNP200 protein (Fragment) OS=Homo sapiens OX=9606 GN=SNRNP200 PE=2 SV=1	208900000	223160000	235450000	233290000	219850000	245800000	269730000	247700000
sp|O75663|TIPRL_HUMAN	sp|O75663|TIPRL_HUMAN	sp|O75663|TIPRL_HUMAN TIP41-like protein OS=Homo sapiens OX=9606 GN=TIPRL PE=1 SV=2	46604000	45305000	41429000	37547000	43645000	53386000	48065000	46152000
sp|O75821|EIF3G_HUMAN;tr|Q6IAM0|Q6IAM0_HUMAN;tr|K7EL20|K7EL20_HUMAN;tr|A8K5K5|A8K5K5_HUMAN;tr|K7ENA8|K7ENA8_HUMAN;tr|K7ER90|K7ER90_HUMAN;tr|K7EP16|K7EP16_HUMAN;tr|B7Z1G0|B7Z1G0_HUMAN;tr|B0AZV5|B0AZV5_HUMAN;tr|K7EL60|K7EL60_HUMAN;tr|K7ENH0|K7ENH0_HUMAN	sp|O75821|EIF3G_HUMAN;tr|Q6IAM0|Q6IAM0_HUMAN;tr|K7EL20|K7EL20_HUMAN;tr|A8K5K5|A8K5K5_HUMAN;tr|K7ENA8|K7ENA8_HUMAN;tr|K7ER90|K7ER90_HUMAN	sp|O75821|EIF3G_HUMAN Eukaryotic translation initiation factor 3 subunit G OS=Homo sapiens OX=9606 GN=EIF3G PE=1 SV=2;tr|Q6IAM0|Q6IAM0_HUMAN Eukaryotic translation initiation factor 3 subunit G OS=Homo sapiens OX=9606 GN=EIF3G PE=2 SV=1;tr|K7EL20|K7EL20_HU	273320000	276070000	305840000	307650000	300670000	287990000	295110000	330470000
sp|O75844|FACE1_HUMAN;tr|B3KNM6|B3KNM6_HUMAN	sp|O75844|FACE1_HUMAN;tr|B3KNM6|B3KNM6_HUMAN	sp|O75844|FACE1_HUMAN CAAX prenyl protease 1 homolog OS=Homo sapiens OX=9606 GN=ZMPSTE24 PE=1 SV=2;tr|B3KNM6|B3KNM6_HUMAN cDNA FLJ14968 fis, clone THYRO1000288, highly similar to CAAX prenyl protease 1 homolog (EC 3.4.24.84) OS=Homo sapiens OX=9606 PE=2 SV	51799000	55310000	58686000	66299000	49719000	50236000	58825000	62443000
sp|O75935|DCTN3_HUMAN;tr|X6RCK5|X6RCK5_HUMAN;tr|X6RLR1|X6RLR1_HUMAN;tr|X6RA56|X6RA56_HUMAN;tr|A0A0A0MRV8|A0A0A0MRV8_HUMAN;tr|Q8NB28|Q8NB28_HUMAN	sp|O75935|DCTN3_HUMAN;tr|X6RCK5|X6RCK5_HUMAN;tr|X6RLR1|X6RLR1_HUMAN;tr|X6RA56|X6RA56_HUMAN	sp|O75935|DCTN3_HUMAN Dynactin subunit 3 OS=Homo sapiens OX=9606 GN=DCTN3 PE=1 SV=1;tr|X6RCK5|X6RCK5_HUMAN Dynactin subunit 3 (Fragment) OS=Homo sapiens OX=9606 GN=DCTN3 PE=1 SV=1;tr|X6RLR1|X6RLR1_HUMAN Dynactin subunit 3 OS=Homo sapiens OX=9606 GN=DCTN3 P	22932000	30295000	25873000	25182000	18335000	24360000	32073000	26485000
sp|O75937|DNJC8_HUMAN;tr|S4R3J5|S4R3J5_HUMAN	sp|O75937|DNJC8_HUMAN	sp|O75937|DNJC8_HUMAN DnaJ homolog subfamily C member 8 OS=Homo sapiens OX=9606 GN=DNAJC8 PE=1 SV=2	53440000	47249000	48749000	50591000	53907000	52574000	49552000	57799000
sp|O75940|SPF30_HUMAN	sp|O75940|SPF30_HUMAN	sp|O75940|SPF30_HUMAN Survival of motor neuron-related-splicing factor 30 OS=Homo sapiens OX=9606 GN=SMNDC1 PE=1 SV=1	62258000	57262000	57580000	60975000	55778000	65865000	64851000	72263000
sp|O75947|ATP5H_HUMAN;tr|F5H608|F5H608_HUMAN;tr|A0PJH2|A0PJH2_HUMAN	sp|O75947|ATP5H_HUMAN	sp|O75947|ATP5H_HUMAN ATP synthase subunit d, mitochondrial OS=Homo sapiens OX=9606 GN=ATP5H PE=1 SV=3	86553000	81775000	84259000	74273000	92423000	90039000	84515000	92842000
sp|O75976|CBPD_HUMAN;tr|B7Z843|B7Z843_HUMAN;tr|J3QRJ9|J3QRJ9_HUMAN	sp|O75976|CBPD_HUMAN;tr|B7Z843|B7Z843_HUMAN	sp|O75976|CBPD_HUMAN Carboxypeptidase D OS=Homo sapiens OX=9606 GN=CPD PE=1 SV=2;tr|B7Z843|B7Z843_HUMAN cDNA FLJ59794, highly similar to Carboxypeptidase D (EC 3.4.17.22) OS=Homo sapiens OX=9606 PE=2 SV=1	41547000	35767000	35430000	39683000	28320000	33311000	32118000	35988000
sp|O94804|STK10_HUMAN;tr|H0YB71|H0YB71_HUMAN	sp|O94804|STK10_HUMAN	sp|O94804|STK10_HUMAN Serine/threonine-protein kinase 10 OS=Homo sapiens OX=9606 GN=STK10 PE=1 SV=1	44198000	44951000	47097000	48281000	34331000	34884000	38091000	40227000
sp|O94826|TOM70_HUMAN;tr|B4DZ87|B4DZ87_HUMAN;tr|B3KQK5|B3KQK5_HUMAN;tr|B3KQK0|B3KQK0_HUMAN	sp|O94826|TOM70_HUMAN;tr|B4DZ87|B4DZ87_HUMAN	sp|O94826|TOM70_HUMAN Mitochondrial import receptor subunit TOM70 OS=Homo sapiens OX=9606 GN=TOMM70 PE=1 SV=1;tr|B4DZ87|B4DZ87_HUMAN cDNA FLJ57240, highly similar to Mitochondrial proteins import receptor OS=Homo sapiens OX=9606 PE=2 SV=1	165990000	135610000	145850000	177690000	145300000	141440000	153960000	140570000
sp|O94901|SUN1_HUMAN;tr|E9PHI4|E9PHI4_HUMAN;tr|A0A146IHP0|A0A146IHP0_HUMAN;tr|A4D2Q0|A4D2Q0_HUMAN;tr|A7MCZ7|A7MCZ7_HUMAN;tr|B4E278|B4E278_HUMAN;tr|H0Y6N5|H0Y6N5_HUMAN;tr|H0Y742|H0Y742_HUMAN;tr|H7C2K3|H7C2K3_HUMAN;tr|H7C019|H7C019_HUMAN;tr|C9JK55|C9JK55_HUMAN;tr|C9K051|C9K051_HUMAN;tr|Q5S4N2|Q5S4N2_HUMAN;tr|C9JR15|C9JR15_HUMAN;tr|C9JS54|C9JS54_HUMAN;tr|C9JJU6|C9JJU6_HUMAN	sp|O94901|SUN1_HUMAN;tr|E9PHI4|E9PHI4_HUMAN;tr|A0A146IHP0|A0A146IHP0_HUMAN;tr|A4D2Q0|A4D2Q0_HUMAN;tr|A7MCZ7|A7MCZ7_HUMAN;tr|B4E278|B4E278_HUMAN;tr|H0Y6N5|H0Y6N5_HUMAN;tr|H0Y742|H0Y742_HUMAN	sp|O94901|SUN1_HUMAN SUN domain-containing protein 1 OS=Homo sapiens OX=9606 GN=SUN1 PE=1 SV=3;tr|E9PHI4|E9PHI4_HUMAN SUN domain-containing protein 1 OS=Homo sapiens OX=9606 GN=SUN1 PE=1 SV=1;tr|A0A146IHP0|A0A146IHP0_HUMAN SUN domain-containing protein 1 O	34167000	39667000	42269000	37921000	28964000	27090000	29333000	27487000
sp|O94906|PRP6_HUMAN	sp|O94906|PRP6_HUMAN	sp|O94906|PRP6_HUMAN Pre-mRNA-processing factor 6 OS=Homo sapiens OX=9606 GN=PRPF6 PE=1 SV=1	21748000	21995000	27637000	24199000	20032000	19667000	23959000	23243000
sp|O95202|LETM1_HUMAN;tr|D3DVQ1|D3DVQ1_HUMAN	sp|O95202|LETM1_HUMAN;tr|D3DVQ1|D3DVQ1_HUMAN	sp|O95202|LETM1_HUMAN Mitochondrial proton/calcium exchanger protein OS=Homo sapiens OX=9606 GN=LETM1 PE=1 SV=1;tr|D3DVQ1|D3DVQ1_HUMAN Leucine zipper-EF-hand containing transmembrane protein 1, isoform CRA_a OS=Homo sapiens OX=9606 GN=LETM1 PE=4 SV=1	68457000	68428000	78147000	78314000	87237000	79068000	78553000	83943000
sp|O95373|IPO7_HUMAN;tr|B3KQG6|B3KQG6_HUMAN;tr|B3KNG9|B3KNG9_HUMAN;tr|E9PLB2|E9PLB2_HUMAN;tr|E9PLJ0|E9PLJ0_HUMAN	sp|O95373|IPO7_HUMAN;tr|B3KQG6|B3KQG6_HUMAN	sp|O95373|IPO7_HUMAN Importin-7 OS=Homo sapiens OX=9606 GN=IPO7 PE=1 SV=1;tr|B3KQG6|B3KQG6_HUMAN cDNA FLJ90427 fis, clone NT2RP3000481, highly similar to Importin-7 OS=Homo sapiens OX=9606 PE=2 SV=1	376280000	379150000	370120000	349760000	417030000	398190000	426100000	418000000
sp|O95433|AHSA1_HUMAN;tr|G3V438|G3V438_HUMAN;tr|H0YJU2|H0YJU2_HUMAN;tr|H0YJG7|H0YJG7_HUMAN;tr|H0YJ63|H0YJ63_HUMAN;tr|G3V3W9|G3V3W9_HUMAN	sp|O95433|AHSA1_HUMAN;tr|G3V438|G3V438_HUMAN	sp|O95433|AHSA1_HUMAN Activator of 90 kDa heat shock protein ATPase homolog 1 OS=Homo sapiens OX=9606 GN=AHSA1 PE=1 SV=1;tr|G3V438|G3V438_HUMAN Activator of 90 kDa heat shock protein ATPase homolog 1 (Fragment) OS=Homo sapiens OX=9606 GN=AHSA1 PE=1 SV=1	207780000	212170000	194060000	227620000	228910000	224840000	201260000	223080000
sp|O95782|AP2A1_HUMAN;tr|Q8N9K4|Q8N9K4_HUMAN;tr|B4DXJ6|B4DXJ6_HUMAN	sp|O95782|AP2A1_HUMAN;tr|Q8N9K4|Q8N9K4_HUMAN	sp|O95782|AP2A1_HUMAN AP-2 complex subunit alpha-1 OS=Homo sapiens OX=9606 GN=AP2A1 PE=1 SV=3;tr|Q8N9K4|Q8N9K4_HUMAN cDNA FLJ36998 fis, clone BRACE2007295, highly similar to ALPHA-ADAPTIN A OS=Homo sapiens OX=9606 PE=2 SV=1	173300000	175590000	188590000	169070000	153380000	157860000	172070000	178930000
sp|O95817|BAG3_HUMAN;tr|Q53GY1|Q53GY1_HUMAN;tr|C9JFK9|C9JFK9_HUMAN	sp|O95817|BAG3_HUMAN;tr|Q53GY1|Q53GY1_HUMAN;tr|C9JFK9|C9JFK9_HUMAN	sp|O95817|BAG3_HUMAN BAG family molecular chaperone regulator 3 OS=Homo sapiens OX=9606 GN=BAG3 PE=1 SV=3;tr|Q53GY1|Q53GY1_HUMAN BCL2-associated athanogene 3 variant (Fragment) OS=Homo sapiens OX=9606 PE=2 SV=1;tr|C9JFK9|C9JFK9_HUMAN BAG family molecular c	110340000	100760000	102760000	126840000	123910000	114480000	118520000	124180000
sp|O95831|AIFM1_HUMAN;tr|E9PMA0|E9PMA0_HUMAN;tr|A0A140VK04|A0A140VK04_HUMAN;tr|Q5RZA0|Q5RZA0_HUMAN;tr|Q5RZ99|Q5RZ99_HUMAN	sp|O95831|AIFM1_HUMAN;tr|E9PMA0|E9PMA0_HUMAN	sp|O95831|AIFM1_HUMAN Apoptosis-inducing factor 1, mitochondrial OS=Homo sapiens OX=9606 GN=AIFM1 PE=1 SV=1;tr|E9PMA0|E9PMA0_HUMAN Apoptosis-inducing factor 1, mitochondrial OS=Homo sapiens OX=9606 GN=AIFM1 PE=1 SV=1	103260000	100710000	109110000	104190000	93648000	88127000	90543000	91481000
sp|O95881|TXD12_HUMAN	sp|O95881|TXD12_HUMAN	sp|O95881|TXD12_HUMAN Thioredoxin domain-containing protein 12 OS=Homo sapiens OX=9606 GN=TXNDC12 PE=1 SV=1	31713000	31004000	34447000	37441000	33646000	35840000	33649000	31294000
sp|O96008|TOM40_HUMAN;tr|K7EJ57|K7EJ57_HUMAN;tr|K7EKG4|K7EKG4_HUMAN	sp|O96008|TOM40_HUMAN;tr|K7EJ57|K7EJ57_HUMAN	sp|O96008|TOM40_HUMAN Mitochondrial import receptor subunit TOM40 homolog OS=Homo sapiens OX=9606 GN=TOMM40 PE=1 SV=1;tr|K7EJ57|K7EJ57_HUMAN Mitochondrial import receptor subunit TOM40 homolog (Fragment) OS=Homo sapiens OX=9606 GN=TOMM40 PE=1 SV=8	111820000	129900000	124290000	133040000	132740000	118590000	134650000	126370000
sp|O96019|ACL6A_HUMAN;tr|Q6FI97|Q6FI97_HUMAN;tr|Q53FS0|Q53FS0_HUMAN;tr|H7C5S0|H7C5S0_HUMAN;tr|C9JQT2|C9JQT2_HUMAN;tr|D3DNS0|D3DNS0_HUMAN;sp|O94805|ACL6B_HUMAN	sp|O96019|ACL6A_HUMAN;tr|Q6FI97|Q6FI97_HUMAN;tr|Q53FS0|Q53FS0_HUMAN;tr|H7C5S0|H7C5S0_HUMAN	sp|O96019|ACL6A_HUMAN Actin-like protein 6A OS=Homo sapiens OX=9606 GN=ACTL6A PE=1 SV=1;tr|Q6FI97|Q6FI97_HUMAN BAF53A protein OS=Homo sapiens OX=9606 GN=BAF53A PE=2 SV=1;tr|Q53FS0|Q53FS0_HUMAN Actin-like 6A isoform 1 variant (Fragment) OS=Homo sapiens OX=9	154800000	128210000	143600000	159770000	147180000	154330000	153530000	154820000
sp|P02545|LMNA_HUMAN;tr|Q5I6Y5|Q5I6Y5_HUMAN;tr|Q8N519|Q8N519_HUMAN;tr|H0YAB0|H0YAB0_HUMAN;tr|A0A0C4DGC5|A0A0C4DGC5_HUMAN;tr|W5X314|W5X314_HUMAN	sp|P02545|LMNA_HUMAN;tr|Q5I6Y5|Q5I6Y5_HUMAN;tr|Q8N519|Q8N519_HUMAN	sp|P02545|LMNA_HUMAN Prelamin-A/C OS=Homo sapiens OX=9606 GN=LMNA PE=1 SV=1;tr|Q5I6Y5|Q5I6Y5_HUMAN Lamin A/C transcript variant 1 OS=Homo sapiens OX=9606 GN=LMNA PE=2 SV=1;tr|Q8N519|Q8N519_HUMAN LMNA protein OS=Homo sapiens OX=9606 PE=2 SV=1	7357400000	6662800000	6861100000	6902700000	4879700000	4879500000	4728500000	5088300000
sp|P02795|MT2_HUMAN;tr|Q8TDC4|Q8TDC4_HUMAN;tr|A0A024R6T4|A0A024R6T4_HUMAN;sp|Q8N339|MT1M_HUMAN;CON__P67983;sp|P13640|MT1G_HUMAN;tr|Q8TE66|Q8TE66_HUMAN;tr|H3BSP9|H3BSP9_HUMAN	sp|P02795|MT2_HUMAN;tr|Q8TDC4|Q8TDC4_HUMAN;tr|A0A024R6T4|A0A024R6T4_HUMAN;sp|Q8N339|MT1M_HUMAN;CON__P67983;sp|P13640|MT1G_HUMAN	sp|P02795|MT2_HUMAN Metallothionein-2 OS=Homo sapiens OX=9606 GN=MT2A PE=1 SV=1;tr|Q8TDC4|Q8TDC4_HUMAN Metallothionein OS=Homo sapiens OX=9606 PE=2 SV=1;tr|A0A024R6T4|A0A024R6T4_HUMAN Metallothionein OS=Homo sapiens OX=9606 GN=MT1M PE=3 SV=1;sp|Q8N339|MT1M	1093400000	380220000	1092800000	579520000	1076100000	808560000	787120000	819730000
sp|P04040|CATA_HUMAN;tr|B4DWK8|B4DWK8_HUMAN;tr|Q8TAK2|Q8TAK2_HUMAN	sp|P04040|CATA_HUMAN;tr|B4DWK8|B4DWK8_HUMAN	sp|P04040|CATA_HUMAN Catalase OS=Homo sapiens OX=9606 GN=CAT PE=1 SV=3;tr|B4DWK8|B4DWK8_HUMAN Catalase OS=Homo sapiens OX=9606 PE=2 SV=1	88798000	97402000	93555000	87707000	73910000	75308000	73636000	75560000
sp|P04632|CPNS1_HUMAN;tr|A0A0C4DGQ5|A0A0C4DGQ5_HUMAN;tr|K7ELJ7|K7ELJ7_HUMAN;tr|K7EM73|K7EM73_HUMAN;tr|A0A075B7C0|A0A075B7C0_HUMAN;tr|K7EKD8|K7EKD8_HUMAN;tr|U3KQE2|U3KQE2_HUMAN;tr|K7EIV0|K7EIV0_HUMAN;tr|U3KPR7|U3KPR7_HUMAN;tr|K7ES78|K7ES78_HUMAN;tr|K7EMQ1|K7EMQ1_HUMAN;sp|Q96L46|CPNS2_HUMAN	sp|P04632|CPNS1_HUMAN;tr|A0A0C4DGQ5|A0A0C4DGQ5_HUMAN;tr|K7ELJ7|K7ELJ7_HUMAN;tr|K7EM73|K7EM73_HUMAN;tr|A0A075B7C0|A0A075B7C0_HUMAN;tr|K7EKD8|K7EKD8_HUMAN;tr|U3KQE2|U3KQE2_HUMAN;tr|K7EIV0|K7EIV0_HUMAN	sp|P04632|CPNS1_HUMAN Calpain small subunit 1 OS=Homo sapiens OX=9606 GN=CAPNS1 PE=1 SV=1;tr|A0A0C4DGQ5|A0A0C4DGQ5_HUMAN Calpain small subunit 1 OS=Homo sapiens OX=9606 GN=CAPNS1 PE=1 SV=1;tr|K7ELJ7|K7ELJ7_HUMAN Calpain small subunit 1 OS=Homo sapiens OX=9	321150000	308190000	310880000	302100000	241790000	271500000	307230000	271490000
sp|P04844|RPN2_HUMAN;tr|B2RE46|B2RE46_HUMAN;tr|Q5JYR7|Q5JYR7_HUMAN;tr|B4DJL0|B4DJL0_HUMAN;tr|Q5JYR4|Q5JYR4_HUMAN;tr|F2Z3K5|F2Z3K5_HUMAN;tr|Q5JYR3|Q5JYR3_HUMAN;tr|H0Y5M1|H0Y5M1_HUMAN	sp|P04844|RPN2_HUMAN;tr|B2RE46|B2RE46_HUMAN	sp|P04844|RPN2_HUMAN Dolichyl-diphosphooligosaccharide--protein glycosyltransferase subunit 2 OS=Homo sapiens OX=9606 GN=RPN2 PE=1 SV=3;tr|B2RE46|B2RE46_HUMAN cDNA, FLJ96923, highly similar to Homo sapiens ribophorin II (RPN2), mRNA OS=Homo sapiens OX=9606	436430000	446210000	436610000	420550000	410440000	447830000	441550000	386120000
sp|P04899|GNAI2_HUMAN;tr|B3KX51|B3KX51_HUMAN;tr|Q96C71|Q96C71_HUMAN;tr|B3KP24|B3KP24_HUMAN;tr|Q93020|Q93020_HUMAN;tr|Q6LCB5|Q6LCB5_HUMAN;sp|P63096|GNAI1_HUMAN;tr|A0A142CHG9|A0A142CHG9_HUMAN;tr|B3KP89|B3KP89_HUMAN;sp|P09471|GNAO_HUMAN;tr|A0A1W2PRE1|A0A1W2PRE1_HUMAN;tr|A2A2R6|A2A2R6_HUMAN;tr|A0A1W2PQK2|A0A1W2PQK2_HUMAN;tr|A0A087WTB6|A0A087WTB6_HUMAN;tr|Q5JWD1|Q5JWD1_HUMAN;tr|H0Y7E8|H0Y7E8_HUMAN;tr|…	sp|P04899|GNAI2_HUMAN;tr|B3KX51|B3KX51_HUMAN;tr|Q96C71|Q96C71_HUMAN;tr|B3KP24|B3KP24_HUMAN;tr|Q93020|Q93020_HUMAN	sp|P04899|GNAI2_HUMAN Guanine nucleotide-binding protein G(i) subunit alpha-2 OS=Homo sapiens OX=9606 GN=GNAI2 PE=1 SV=3;tr|B3KX51|B3KX51_HUMAN cDNA FLJ44754 fis, clone BRACE3030748, highly similar to Guanine nucleotide-binding protein G(i), alpha-2 subuni	280150000	275920000	278200000	227750000	245950000	262530000	246110000	255210000
sp|P05023|AT1A1_HUMAN;tr|B7Z3V1|B7Z3V1_HUMAN;tr|B7Z1N5|B7Z1N5_HUMAN;tr|B3KRI1|B3KRI1_HUMAN;tr|M0R116|M0R116_HUMAN;tr|B1AKY9|B1AKY9_HUMAN;tr|Q53ES0|Q53ES0_HUMAN;sp|P13637|AT1A3_HUMAN;tr|B2RAQ4|B2RAQ4_HUMAN;tr|A0A0S2Z3W6|A0A0S2Z3W6_HUMAN;sp|P50993|AT1A2_HUMAN;tr|B7Z9V4|B7Z9V4_HUMAN;tr|A0A0A0MT26|A0A0A0MT26_HUMAN;tr|B7Z1Q9|B7Z1Q9_HUMAN;tr|B3KX35|B3KX35_HUMAN;tr|H0Y7C1|H0Y7C1_HUMAN;tr|B4DIQ8|B4DIQ8_H…	sp|P05023|AT1A1_HUMAN;tr|B7Z3V1|B7Z3V1_HUMAN	sp|P05023|AT1A1_HUMAN Sodium/potassium-transporting ATPase subunit alpha-1 OS=Homo sapiens OX=9606 GN=ATP1A1 PE=1 SV=1;tr|B7Z3V1|B7Z3V1_HUMAN Sodium/potassium-transporting ATPase subunit alpha (Fragment) OS=Homo sapiens OX=9606 PE=2 SV=1	1007400000	934580000	908270000	939150000	947880000	946240000	932230000	951330000
sp|P05091|ALDH2_HUMAN;tr|Q53FB6|Q53FB6_HUMAN;tr|B4YAH7|B4YAH7_HUMAN;tr|S4R3S4|S4R3S4_HUMAN;tr|F8VP50|F8VP50_HUMAN;tr|Q9UN17|Q9UN17_HUMAN;tr|Q59EJ0|Q59EJ0_HUMAN;tr|B4DXX3|B4DXX3_HUMAN;tr|H0Y2X5|H0Y2X5_HUMAN;tr|Q7Z3A2|Q7Z3A2_HUMAN;tr|B4DDF8|B4DDF8_HUMAN;tr|B4DYU3|B4DYU3_HUMAN;tr|H0YMG7|H0YMG7_HUMAN;tr|B4DH89|B4DH89_HUMAN;tr|V9HW83|V9HW83_HUMAN;tr|V9HVX6|V9HVX6_HUMAN;sp|P00352|AL1A1_HUMAN;tr|B2R5T2|…	sp|P05091|ALDH2_HUMAN;tr|Q53FB6|Q53FB6_HUMAN;tr|B4YAH7|B4YAH7_HUMAN	sp|P05091|ALDH2_HUMAN Aldehyde dehydrogenase, mitochondrial OS=Homo sapiens OX=9606 GN=ALDH2 PE=1 SV=2;tr|Q53FB6|Q53FB6_HUMAN Mitochondrial aldehyde dehydrogenase 2 variant (Fragment) OS=Homo sapiens OX=9606 PE=2 SV=1;tr|B4YAH7|B4YAH7_HUMAN ALDH2 (Fragment	108180000	80284000	88467000	81979000	68246000	68138000	74750000	67186000
sp|P05114|HMGN1_HUMAN;tr|A6NL93|A6NL93_HUMAN;tr|Q6NSG7|Q6NSG7_HUMAN;tr|Q3B790|Q3B790_HUMAN;tr|A6NEL0|A6NEL0_HUMAN;tr|A0A024R2A3|A0A024R2A3_HUMAN;tr|D3DWY4|D3DWY4_HUMAN;tr|F2Z2W6|F2Z2W6_HUMAN;tr|F2Z2Y5|F2Z2Y5_HUMAN;tr|H7BXJ5|H7BXJ5_HUMAN	sp|P05114|HMGN1_HUMAN;tr|A6NL93|A6NL93_HUMAN;tr|Q6NSG7|Q6NSG7_HUMAN;tr|Q3B790|Q3B790_HUMAN;tr|A6NEL0|A6NEL0_HUMAN;tr|A0A024R2A3|A0A024R2A3_HUMAN	sp|P05114|HMGN1_HUMAN Non-histone chromosomal protein HMG-14 OS=Homo sapiens OX=9606 GN=HMGN1 PE=1 SV=3;tr|A6NL93|A6NL93_HUMAN Non-histone chromosomal protein HMG-14 OS=Homo sapiens OX=9606 GN=HMGN1 PE=1 SV=1;tr|Q6NSG7|Q6NSG7_HUMAN High-mobility group nucl	26249000	25263000	36463000	39512000	11854000	13050000	21049000	31099000
sp|P05141|ADT2_HUMAN;tr|Q6NVC0|Q6NVC0_HUMAN;sp|Q9H0C2|ADT4_HUMAN	sp|P05141|ADT2_HUMAN;tr|Q6NVC0|Q6NVC0_HUMAN	sp|P05141|ADT2_HUMAN ADP/ATP translocase 2 OS=Homo sapiens OX=9606 GN=SLC25A5 PE=1 SV=7;tr|Q6NVC0|Q6NVC0_HUMAN SLC25A5 protein (Fragment) OS=Homo sapiens OX=9606 GN=SLC25A5 PE=2 SV=1	1508400000	1553300000	1457100000	1581500000	1509100000	1514200000	1570300000	1516900000
sp|P05556|ITB1_HUMAN;tr|E7EQW5|E7EQW5_HUMAN;tr|C9JPK5|C9JPK5_HUMAN;tr|Q5T3E6|Q5T3E6_HUMAN;tr|E9PLR6|E9PLR6_HUMAN;tr|E7EUI6|E7EUI6_HUMAN;tr|E7ERX5|E7ERX5_HUMAN;tr|C9JJP8|C9JJP8_HUMAN;tr|Q5T3E5|Q5T3E5_HUMAN;tr|E9PQJ2|E9PQJ2_HUMAN;tr|H7C4N8|H7C4N8_HUMAN;tr|C9JNE0|C9JNE0_HUMAN	sp|P05556|ITB1_HUMAN	sp|P05556|ITB1_HUMAN Integrin beta-1 OS=Homo sapiens OX=9606 GN=ITGB1 PE=1 SV=2	1134700000	1059100000	1104000000	1054500000	995450000	971820000	967960000	969160000
sp|P05787|K2C8_HUMAN;CON__P05787;tr|Q969I0|Q969I0_HUMAN;tr|Q7L4M3|Q7L4M3_HUMAN;tr|F8VUG2|F8VUG2_HUMAN;tr|F8W1U3|F8W1U3_HUMAN;CON__H-INV:HIT000292931;tr|F8VP67|F8VP67_HUMAN;CON__Q9H552;CON__H-INV:HIT000016045;tr|H0YIB2|H0YIB2_HUMAN;tr|F8VQY3|F8VQY3_HUMAN;CON__REFSEQ:XP_092267;sp|Q9NSB2|KRT84_HUMAN;CON__Q9NSB2;CON__Q6ISB0;tr|Q8IWY7|Q8IWY7_HUMAN	sp|P05787|K2C8_HUMAN;CON__P05787;tr|Q969I0|Q969I0_HUMAN;tr|Q7L4M3|Q7L4M3_HUMAN;tr|F8VUG2|F8VUG2_HUMAN	sp|P05787|K2C8_HUMAN Keratin, type II cytoskeletal 8 OS=Homo sapiens OX=9606 GN=KRT8 PE=1 SV=7;;tr|Q969I0|Q969I0_HUMAN KRT8 protein (Fragment) OS=Homo sapiens OX=9606 GN=KRT8 PE=2 SV=2;tr|Q7L4M3|Q7L4M3_HUMAN KRT8 protein OS=Homo sapiens OX=9606 PE=2 SV=1;t	3275400000	3188500000	3293000000	3562700000	2507800000	2458500000	2488000000	2567000000
sp|P06703|S10A6_HUMAN;tr|B2R577|B2R577_HUMAN;tr|R4GN98|R4GN98_HUMAN	sp|P06703|S10A6_HUMAN;tr|B2R577|B2R577_HUMAN;tr|R4GN98|R4GN98_HUMAN	sp|P06703|S10A6_HUMAN Protein S100-A6 OS=Homo sapiens OX=9606 GN=S100A6 PE=1 SV=1;tr|B2R577|B2R577_HUMAN Protein S100 OS=Homo sapiens OX=9606 PE=2 SV=1;tr|R4GN98|R4GN98_HUMAN Protein S100 (Fragment) OS=Homo sapiens OX=9606 GN=S100A6 PE=1 SV=1	5125600000	6885900000	8219900000	8060000000	1961900000	3912800000	4953000000	2037900000
sp|P06730|IF4E_HUMAN;tr|Q32Q75|Q32Q75_HUMAN;tr|X5D7E3|X5D7E3_HUMAN;tr|D6RBW1|D6RBW1_HUMAN;tr|B7Z2T1|B7Z2T1_HUMAN;tr|H0Y8J7|H0Y8J7_HUMAN;tr|D6RFJ3|D6RFJ3_HUMAN	sp|P06730|IF4E_HUMAN;tr|Q32Q75|Q32Q75_HUMAN;tr|X5D7E3|X5D7E3_HUMAN;tr|D6RBW1|D6RBW1_HUMAN;tr|B7Z2T1|B7Z2T1_HUMAN	sp|P06730|IF4E_HUMAN Eukaryotic translation initiation factor 4E OS=Homo sapiens OX=9606 GN=EIF4E PE=1 SV=2;tr|Q32Q75|Q32Q75_HUMAN Eukaryotic translation initiation factor 4E OS=Homo sapiens OX=9606 GN=EIF4E PE=2 SV=1;tr|X5D7E3|X5D7E3_HUMAN Eukaryotic tran	91231000	94369000	124910000	89942000	103180000	107220000	103170000	95348000
sp|P06737|PYGL_HUMAN;tr|E9PK47|E9PK47_HUMAN;tr|B2R825|B2R825_HUMAN;tr|Q6P1L4|Q6P1L4_HUMAN	sp|P06737|PYGL_HUMAN;tr|E9PK47|E9PK47_HUMAN;tr|B2R825|B2R825_HUMAN	sp|P06737|PYGL_HUMAN Glycogen phosphorylase, liver form OS=Homo sapiens OX=9606 GN=PYGL PE=1 SV=4;tr|E9PK47|E9PK47_HUMAN Alpha-1,4 glucan phosphorylase OS=Homo sapiens OX=9606 GN=PYGL PE=1 SV=1;tr|B2R825|B2R825_HUMAN Alpha-1,4 glucan phosphorylase OS=Homo	186420000	186110000	168900000	176910000	243520000	259960000	237660000	250000000
sp|P07108|ACBP_HUMAN;tr|B8ZWD1|B8ZWD1_HUMAN;tr|A0A024RAF2|A0A024RAF2_HUMAN;tr|A0A0A0MTI5|A0A0A0MTI5_HUMAN;tr|B8ZWD9|B8ZWD9_HUMAN;tr|B8ZWD8|B8ZWD8_HUMAN	sp|P07108|ACBP_HUMAN;tr|B8ZWD1|B8ZWD1_HUMAN;tr|A0A024RAF2|A0A024RAF2_HUMAN;tr|A0A0A0MTI5|A0A0A0MTI5_HUMAN;tr|B8ZWD9|B8ZWD9_HUMAN;tr|B8ZWD8|B8ZWD8_HUMAN	sp|P07108|ACBP_HUMAN Acyl-CoA-binding protein OS=Homo sapiens OX=9606 GN=DBI PE=1 SV=2;tr|B8ZWD1|B8ZWD1_HUMAN Acyl-CoA-binding protein OS=Homo sapiens OX=9606 GN=DBI PE=1 SV=1;tr|A0A024RAF2|A0A024RAF2_HUMAN Diazepam binding inhibitor (GABA receptor modulat	260920000	241090000	216730000	262620000	251300000	238470000	229200000	226180000
sp|P07384|CAN1_HUMAN;tr|A0A024R5A3|A0A024R5A3_HUMAN;tr|A0A024R580|A0A024R580_HUMAN;tr|B2RDI5|B2RDI5_HUMAN;tr|B4DWH5|B4DWH5_HUMAN;tr|E9PRM1|E9PRM1_HUMAN;tr|E9PJJ3|E9PJJ3_HUMAN;tr|E9PLC9|E9PLC9_HUMAN;tr|E9PMC6|E9PMC6_HUMAN;tr|E9PJA6|E9PJA6_HUMAN;tr|E9PSA6|E9PSA6_HUMAN;tr|E9PQB3|E9PQB3_HUMAN;tr|E9PLX0|E9PLX0_HUMAN;tr|B4DS85|B4DS85_HUMAN;tr|E9PL37|E9PL37_HUMAN;tr|E9PIA9|E9PIA9_HUMAN	sp|P07384|CAN1_HUMAN;tr|A0A024R5A3|A0A024R5A3_HUMAN;tr|A0A024R580|A0A024R580_HUMAN;tr|B2RDI5|B2RDI5_HUMAN;tr|B4DWH5|B4DWH5_HUMAN	sp|P07384|CAN1_HUMAN Calpain-1 catalytic subunit OS=Homo sapiens OX=9606 GN=CAPN1 PE=1 SV=1;tr|A0A024R5A3|A0A024R5A3_HUMAN Calpain 1, (Mu/I) large subunit, isoform CRA_b OS=Homo sapiens OX=9606 GN=CAPN1 PE=3 SV=1;tr|A0A024R580|A0A024R580_HUMAN Calpain 1, (	136930000	141890000	152440000	153800000	135210000	141690000	143180000	139920000
sp|P07737|PROF1_HUMAN;tr|K7EJ44|K7EJ44_HUMAN;CON__P02584;tr|I3L3D5|I3L3D5_HUMAN	sp|P07737|PROF1_HUMAN;tr|K7EJ44|K7EJ44_HUMAN	sp|P07737|PROF1_HUMAN Profilin-1 OS=Homo sapiens OX=9606 GN=PFN1 PE=1 SV=2;tr|K7EJ44|K7EJ44_HUMAN Profilin OS=Homo sapiens OX=9606 GN=PFN1 PE=1 SV=1	4069800000	3766100000	3828200000	4407800000	4057000000	3981000000	4086700000	4111300000
sp|P07741|APT_HUMAN;tr|H3BQZ9|H3BQZ9_HUMAN;tr|H3BQF1|H3BQF1_HUMAN;tr|H3BSW3|H3BSW3_HUMAN;tr|H3BQB1|H3BQB1_HUMAN;tr|Q12898|Q12898_HUMAN	sp|P07741|APT_HUMAN;tr|H3BQZ9|H3BQZ9_HUMAN;tr|H3BQF1|H3BQF1_HUMAN;tr|H3BSW3|H3BSW3_HUMAN;tr|H3BQB1|H3BQB1_HUMAN	sp|P07741|APT_HUMAN Adenine phosphoribosyltransferase OS=Homo sapiens OX=9606 GN=APRT PE=1 SV=2;tr|H3BQZ9|H3BQZ9_HUMAN Adenine phosphoribosyltransferase OS=Homo sapiens OX=9606 GN=APRT PE=1 SV=1;tr|H3BQF1|H3BQF1_HUMAN Adenine phosphoribosyltransferase (Fra	128960000	117570000	120260000	130220000	113780000	116920000	116180000	116570000
sp|P07814|SYEP_HUMAN;tr|V9GYZ6|V9GYZ6_HUMAN;tr|Q3KQZ8|Q3KQZ8_HUMAN;tr|B4DKX5|B4DKX5_HUMAN;tr|H6WCP5|H6WCP5_HUMAN;tr|B4DP50|B4DP50_HUMAN;tr|V9GZ76|V9GZ76_HUMAN	sp|P07814|SYEP_HUMAN;tr|V9GYZ6|V9GYZ6_HUMAN;tr|Q3KQZ8|Q3KQZ8_HUMAN;tr|B4DKX5|B4DKX5_HUMAN;tr|H6WCP5|H6WCP5_HUMAN	sp|P07814|SYEP_HUMAN Bifunctional glutamate/proline--tRNA ligase OS=Homo sapiens OX=9606 GN=EPRS PE=1 SV=5;tr|V9GYZ6|V9GYZ6_HUMAN Bifunctional glutamate/proline--tRNA ligase (Fragment) OS=Homo sapiens OX=9606 GN=EPRS PE=1 SV=1;tr|Q3KQZ8|Q3KQZ8_HUMAN EPRS p	785320000	760790000	769520000	784960000	709310000	696820000	689830000	748480000
sp|P07919|QCR6_HUMAN;tr|Q567R0|Q567R0_HUMAN;sp|A0A096LP55|QCR6L_HUMAN	sp|P07919|QCR6_HUMAN;tr|Q567R0|Q567R0_HUMAN	sp|P07919|QCR6_HUMAN Cytochrome b-c1 complex subunit 6, mitochondrial OS=Homo sapiens OX=9606 GN=UQCRH PE=1 SV=2;tr|Q567R0|Q567R0_HUMAN UQCRH protein OS=Homo sapiens OX=9606 GN=UQCRH PE=2 SV=1	53236000	53652000	44549000	47939000	64301000	65587000	50159000	55599000
sp|P07996|TSP1_HUMAN;tr|A0A024R9Q1|A0A024R9Q1_HUMAN;CON__Q28194;tr|A0PJG0|A0PJG0_HUMAN;tr|A8MZG1|A8MZG1_HUMAN;tr|Q6MZL6|Q6MZL6_HUMAN;sp|P35442|TSP2_HUMAN	sp|P07996|TSP1_HUMAN;tr|A0A024R9Q1|A0A024R9Q1_HUMAN	sp|P07996|TSP1_HUMAN Thrombospondin-1 OS=Homo sapiens OX=9606 GN=THBS1 PE=1 SV=2;tr|A0A024R9Q1|A0A024R9Q1_HUMAN Thrombospondin 1, isoform CRA_a OS=Homo sapiens OX=9606 GN=THBS1 PE=4 SV=1	46913000	45158000	39504000	42892000	36531000	35253000	43279000	37342000
sp|P08240|SRPRA_HUMAN;tr|Q6IAX9|Q6IAX9_HUMAN;tr|A0A024R3M0|A0A024R3M0_HUMAN	sp|P08240|SRPRA_HUMAN;tr|Q6IAX9|Q6IAX9_HUMAN;tr|A0A024R3M0|A0A024R3M0_HUMAN	sp|P08240|SRPRA_HUMAN Signal recognition particle receptor subunit alpha OS=Homo sapiens OX=9606 GN=SRPRA PE=1 SV=2;tr|Q6IAX9|Q6IAX9_HUMAN SRPR protein OS=Homo sapiens OX=9606 GN=SRPR PE=2 SV=1;tr|A0A024R3M0|A0A024R3M0_HUMAN Signal recognition particle rec	53833000	51078000	49302000	52552000	51634000	47821000	52472000	48858000
sp|P08243|ASNS_HUMAN;tr|F8WEJ5|F8WEJ5_HUMAN;tr|C9J057|C9J057_HUMAN;tr|C9JM09|C9JM09_HUMAN;tr|C9JT45|C9JT45_HUMAN;tr|C9JLN6|C9JLN6_HUMAN	sp|P08243|ASNS_HUMAN	sp|P08243|ASNS_HUMAN Asparagine synthetase [glutamine-hydrolyzing] OS=Homo sapiens OX=9606 GN=ASNS PE=1 SV=4	55053000	54786000	37610000	52792000	49955000	34113000	39245000	32861000
sp|P08708|RS17_HUMAN;tr|H0YN88|H0YN88_HUMAN;tr|A0A075B716|A0A075B716_HUMAN;tr|H0YN73|H0YN73_HUMAN;tr|H9E9D9|H9E9D9_HEV;tr|H9E9D8|H9E9D8_HEV;tr|H9E9D7|H9E9D7_HEV;tr|H9E9D6|H9E9D6_HEV;tr|H9E9D5|H9E9D5_HEV;tr|H9E9D4|H9E9D4_HEV;tr|H9E9C7|H9E9C7_HEV;tr|E9NST6|E9NST6_HEV;tr|E9N3C0|E9N3C0_HEV	sp|P08708|RS17_HUMAN;tr|H0YN88|H0YN88_HUMAN;tr|A0A075B716|A0A075B716_HUMAN	sp|P08708|RS17_HUMAN 40S ribosomal protein S17 OS=Homo sapiens OX=9606 GN=RPS17 PE=1 SV=2;tr|H0YN88|H0YN88_HUMAN 40S ribosomal protein S17 OS=Homo sapiens OX=9606 GN=RPS17 PE=1 SV=1;tr|A0A075B716|A0A075B716_HUMAN 40S ribosomal protein S17 OS=Homo sapiens O	278360000	279380000	275390000	272730000	279920000	275010000	275900000	322830000
sp|P08729|K2C7_HUMAN;CON__Q3KNV1;CON__P08729;tr|B3KY79|B3KY79_HUMAN;tr|Q96GE1|Q96GE1_HUMAN;tr|Q3KNV1|Q3KNV1_HUMAN;tr|A0A1W2PRP1|A0A1W2PRP1_HUMAN;tr|Q3B834|Q3B834_HUMAN;CON__Q9DCV7;tr|B4DRW1|B4DRW1_HUMAN;tr|B4DRR7|B4DRR7_HUMAN;tr|B4DKJ0|B4DKJ0_HUMAN;sp|Q14CN4|K2C72_HUMAN;CON__Q14CN4-1;tr|B4DRS2|B4DRS2_HUMAN;CON__Q6IME9;sp|P19013|K2C4_HUMAN;CON__P19013;tr|Q6PIN2|Q6PIN2_HUMAN;tr|B4DXK4|B4DXK4_HUMAN	sp|P08729|K2C7_HUMAN;CON__Q3KNV1;CON__P08729;tr|B3KY79|B3KY79_HUMAN	sp|P08729|K2C7_HUMAN Keratin, type II cytoskeletal 7 OS=Homo sapiens OX=9606 GN=KRT7 PE=1 SV=5;;;tr|B3KY79|B3KY79_HUMAN cDNA FLJ46620 fis, clone TLUNG2000654, highly similar to Keratin, type II cytoskeletal 7 OS=Homo sapiens OX=9606 PE=2 SV=1	831980000	819640000	800070000	878470000	382390000	386050000	368480000	408040000
sp|P09382|LEG1_HUMAN;tr|F8WEI7|F8WEI7_HUMAN	sp|P09382|LEG1_HUMAN	sp|P09382|LEG1_HUMAN Galectin-1 OS=Homo sapiens OX=9606 GN=LGALS1 PE=1 SV=2	3242400000	3214600000	2833500000	2021400000	2364600000	2583300000	2523800000	2503200000
sp|P09496|CLCA_HUMAN;tr|F8WF69|F8WF69_HUMAN;tr|C9J8P9|C9J8P9_HUMAN	sp|P09496|CLCA_HUMAN;tr|F8WF69|F8WF69_HUMAN;tr|C9J8P9|C9J8P9_HUMAN	sp|P09496|CLCA_HUMAN Clathrin light chain A OS=Homo sapiens OX=9606 GN=CLTA PE=1 SV=1;tr|F8WF69|F8WF69_HUMAN Clathrin light chain OS=Homo sapiens OX=9606 GN=CLTA PE=1 SV=1;tr|C9J8P9|C9J8P9_HUMAN Clathrin light chain OS=Homo sapiens OX=9606 GN=CLTA PE=1 SV=	141450000	139770000	120720000	133330000	165560000	137770000	132840000	146840000
sp|P09525|ANXA4_HUMAN;tr|V9HW59|V9HW59_HUMAN;tr|Q6LES2|Q6LES2_HUMAN;tr|Q6P452|Q6P452_HUMAN;tr|B4DDZ4|B4DDZ4_HUMAN;tr|B4DE02|B4DE02_HUMAN;tr|Q59FK3|Q59FK3_HUMAN;tr|Q6MZI0|Q6MZI0_HUMAN;tr|B4E1S2|B4E1S2_HUMAN;tr|Q6TUW3|Q6TUW3_YMTV5	sp|P09525|ANXA4_HUMAN;tr|V9HW59|V9HW59_HUMAN;tr|Q6LES2|Q6LES2_HUMAN;tr|Q6P452|Q6P452_HUMAN;tr|B4DDZ4|B4DDZ4_HUMAN;tr|B4DE02|B4DE02_HUMAN;tr|Q59FK3|Q59FK3_HUMAN	sp|P09525|ANXA4_HUMAN Annexin A4 OS=Homo sapiens OX=9606 GN=ANXA4 PE=1 SV=4;tr|V9HW59|V9HW59_HUMAN Annexin OS=Homo sapiens OX=9606 GN=HEL-S-274 PE=2 SV=1;tr|Q6LES2|Q6LES2_HUMAN Annexin (Fragment) OS=Homo sapiens OX=9606 GN=ANXA4 PE=1 SV=1;tr|Q6P452|Q6P452_	91995000	90891000	88808000	90663000	95895000	77437000	79993000	88383000
sp|P09661|RU2A_HUMAN;tr|Q53G61|Q53G61_HUMAN;tr|Q53G21|Q53G21_HUMAN;tr|H0YKK0|H0YKK0_HUMAN;tr|Q6NVW9|Q6NVW9_HUMAN;tr|H0YMA0|H0YMA0_HUMAN;tr|H0YLR3|H0YLR3_HUMAN;tr|Q9UEN1|Q9UEN1_HUMAN;tr|O95485|O95485_HUMAN	sp|P09661|RU2A_HUMAN;tr|Q53G61|Q53G61_HUMAN;tr|Q53G21|Q53G21_HUMAN;tr|H0YKK0|H0YKK0_HUMAN;tr|Q6NVW9|Q6NVW9_HUMAN	sp|P09661|RU2A_HUMAN U2 small nuclear ribonucleoprotein A OS=Homo sapiens OX=9606 GN=SNRPA1 PE=1 SV=2;tr|Q53G61|Q53G61_HUMAN Small nuclear ribonucleoprotein polypeptide A variant (Fragment) OS=Homo sapiens OX=9606 PE=2 SV=1;tr|Q53G21|Q53G21_HUMAN Small n	56322000	75727000	85663000	70318000	45357000	71229000	105900000	65127000
sp|P11177|ODPB_HUMAN;tr|C9J634|C9J634_HUMAN;tr|F8WF02|F8WF02_HUMAN;tr|Q59G68|Q59G68_HUMAN	sp|P11177|ODPB_HUMAN;tr|C9J634|C9J634_HUMAN;tr|F8WF02|F8WF02_HUMAN	sp|P11177|ODPB_HUMAN Pyruvate dehydrogenase E1 component subunit beta, mitochondrial OS=Homo sapiens OX=9606 GN=PDHB PE=1 SV=3;tr|C9J634|C9J634_HUMAN Pyruvate dehydrogenase E1 component subunit beta, mitochondrial OS=Homo sapiens OX=9606 GN=PDHB PE=1 SV=1;	151790000	147290000	144310000	142010000	115150000	130500000	117660000	116810000
sp|P11216|PYGB_HUMAN;tr|B4DSD8|B4DSD8_HUMAN;tr|Q59GM9|Q59GM9_HUMAN;tr|Q8TDG6|Q8TDG6_HUMAN;tr|H0Y4Z6|H0Y4Z6_HUMAN;tr|B4DRQ4|B4DRQ4_HUMAN	sp|P11216|PYGB_HUMAN;tr|B4DSD8|B4DSD8_HUMAN;tr|Q59GM9|Q59GM9_HUMAN	sp|P11216|PYGB_HUMAN Glycogen phosphorylase, brain form OS=Homo sapiens OX=9606 GN=PYGB PE=1 SV=5;tr|B4DSD8|B4DSD8_HUMAN Alpha-1,4 glucan phosphorylase OS=Homo sapiens OX=9606 PE=2 SV=1;tr|Q59GM9|Q59GM9_HUMAN Alpha-1,4 glucan phosphorylase (Fragment) OS=Ho	651960000	689290000	575880000	667600000	598930000	580560000	604220000	598270000
sp|P11233|RALA_HUMAN;tr|A0A024RAG3|A0A024RAG3_HUMAN;sp|P11234|RALB_HUMAN;tr|H7C3P7|H7C3P7_HUMAN;tr|C9JPE8|C9JPE8_HUMAN;tr|C9JYR1|C9JYR1_HUMAN;tr|C9J6B1|C9J6B1_HUMAN;tr|C9JQB3|C9JQB3_HUMAN;tr|B4E364|B4E364_HUMAN;tr|F8WEQ6|F8WEQ6_HUMAN	sp|P11233|RALA_HUMAN;tr|A0A024RAG3|A0A024RAG3_HUMAN;sp|P11234|RALB_HUMAN;tr|H7C3P7|H7C3P7_HUMAN;tr|C9JPE8|C9JPE8_HUMAN;tr|C9JYR1|C9JYR1_HUMAN;tr|C9J6B1|C9J6B1_HUMAN;tr|C9JQB3|C9JQB3_HUMAN	sp|P11233|RALA_HUMAN Ras-related protein Ral-A OS=Homo sapiens OX=9606 GN=RALA PE=1 SV=1;tr|A0A024RAG3|A0A024RAG3_HUMAN V-ral simian leukemia viral oncogene homolog B (Ras related GTP binding protein), isoform CRA_a OS=Homo sapiens OX=9606 GN=RALB PE=4 SV=	33854000	37092000	30473000	36997000	34507000	35290000	32876000	32205000
sp|P11586|C1TC_HUMAN;tr|A0A024R652|A0A024R652_HUMAN;tr|F5H2F4|F5H2F4_HUMAN;tr|B7Z809|B7Z809_HUMAN;tr|V9GYY3|V9GYY3_HUMAN	sp|P11586|C1TC_HUMAN;tr|A0A024R652|A0A024R652_HUMAN;tr|F5H2F4|F5H2F4_HUMAN;tr|B7Z809|B7Z809_HUMAN	sp|P11586|C1TC_HUMAN C-1-tetrahydrofolate synthase, cytoplasmic OS=Homo sapiens OX=9606 GN=MTHFD1 PE=1 SV=3;tr|A0A024R652|A0A024R652_HUMAN Methylenetetrahydrofolate dehydrogenase (NADP+ dependent) 1, methenyltetrahydrofolate cyclohydrolase, formyltetrahydr	601520000	566660000	579400000	563740000	666500000	645350000	604020000	631300000
sp|P11908|PRPS2_HUMAN;tr|A0A140VK41|A0A140VK41_HUMAN;tr|B2R860|B2R860_HUMAN;tr|D3YTJ7|D3YTJ7_HUMAN;tr|A6NMS2|A6NMS2_HUMAN	sp|P11908|PRPS2_HUMAN;tr|A0A140VK41|A0A140VK41_HUMAN;tr|B2R860|B2R860_HUMAN;tr|D3YTJ7|D3YTJ7_HUMAN	sp|P11908|PRPS2_HUMAN Ribose-phosphate pyrophosphokinase 2 OS=Homo sapiens OX=9606 GN=PRPS2 PE=1 SV=2;tr|A0A140VK41|A0A140VK41_HUMAN Testicular secretory protein Li 41 OS=Homo sapiens OX=9606 PE=2 SV=1;tr|B2R860|B2R860_HUMAN cDNA, FLJ93752, highly similar	138390000	146080000	145510000	124030000	154920000	145860000	149650000	141610000
sp|P12268|IMDH2_HUMAN;tr|H0Y4R1|H0Y4R1_HUMAN;tr|B7Z1G4|B7Z1G4_HUMAN;tr|Q6QE17|Q6QE17_HUMAN;tr|E7ETK5|E7ETK5_HUMAN;tr|Q6RUP9|Q6RUP9_HUMAN;tr|Q6RUP8|Q6RUP8_HUMAN;tr|C9K0R9|C9K0R9_HUMAN;tr|A0A024R725|A0A024R725_HUMAN;tr|C9J381|C9J381_HUMAN;tr|B4DNJ7|B4DNJ7_HUMAN;sp|P20839|IMDH1_HUMAN;tr|B3KRZ3|B3KRZ3_HUMAN;tr|Q6ZNB1|Q6ZNB1_HUMAN;tr|Q5H9Q6|Q5H9Q6_HUMAN	sp|P12268|IMDH2_HUMAN;tr|H0Y4R1|H0Y4R1_HUMAN;tr|B7Z1G4|B7Z1G4_HUMAN	sp|P12268|IMDH2_HUMAN Inosine-5-monophosphate dehydrogenase 2 OS=Homo sapiens OX=9606 GN=IMPDH2 PE=1 SV=2;tr|H0Y4R1|H0Y4R1_HUMAN Inosine-5-monophosphate dehydrogenase 2 (Fragment) OS=Homo sapiens OX=9606 GN=IMPDH2 PE=1 SV=1;tr|B7Z1G4|B7Z1G4_HUMAN cDNA FL	708080000	647510000	612080000	644470000	772860000	748470000	701530000	753950000
sp|P12270|TPR_HUMAN;tr|Q58F23|Q58F23_HUMAN;tr|Q504U6|Q504U6_HUMAN;tr|A0PJC9|A0PJC9_HUMAN;tr|Q9UE33|Q9UE33_HUMAN;tr|Q5SWX9|Q5SWX9_HUMAN	sp|P12270|TPR_HUMAN	sp|P12270|TPR_HUMAN Nucleoprotein TPR OS=Homo sapiens OX=9606 GN=TPR PE=1 SV=3	300960000	281910000	269770000	267820000	333350000	347450000	307310000	336910000
sp|P12429|ANXA3_HUMAN;tr|D6RA82|D6RA82_HUMAN;tr|D6RFG5|D6RFG5_HUMAN;tr|D6RCA8|D6RCA8_HUMAN;tr|D6RAZ8|D6RAZ8_HUMAN;tr|D6RFJ9|D6RFJ9_HUMAN	sp|P12429|ANXA3_HUMAN;tr|D6RA82|D6RA82_HUMAN	sp|P12429|ANXA3_HUMAN Annexin A3 OS=Homo sapiens OX=9606 GN=ANXA3 PE=1 SV=3;tr|D6RA82|D6RA82_HUMAN Annexin OS=Homo sapiens OX=9606 GN=ANXA3 PE=1 SV=1	525290000	525020000	503770000	492320000	478610000	476170000	457680000	478170000
sp|P13010|XRCC5_HUMAN;tr|Q53T09|Q53T09_HUMAN;tr|Q53TC2|Q53TC2_HUMAN;tr|C9JZ81|C9JZ81_HUMAN;tr|H7C0H9|H7C0H9_HUMAN	sp|P13010|XRCC5_HUMAN;tr|Q53T09|Q53T09_HUMAN	sp|P13010|XRCC5_HUMAN X-ray repair cross-complementing protein 5 OS=Homo sapiens OX=9606 GN=XRCC5 PE=1 SV=3;tr|Q53T09|Q53T09_HUMAN Uncharacterized protein XRCC5 (Fragment) OS=Homo sapiens OX=9606 GN=XRCC5 PE=4 SV=1	878330000	897680000	892500000	916740000	904570000	900940000	919660000	890430000
sp|P13073|COX41_HUMAN;tr|H3BN72|H3BN72_HUMAN;tr|H3BNV9|H3BNV9_HUMAN;tr|Q86WV2|Q86WV2_HUMAN;tr|H3BPG0|H3BPG0_HUMAN;tr|H3BNI5|H3BNI5_HUMAN	sp|P13073|COX41_HUMAN;tr|H3BN72|H3BN72_HUMAN;tr|H3BNV9|H3BNV9_HUMAN;tr|Q86WV2|Q86WV2_HUMAN;tr|H3BPG0|H3BPG0_HUMAN	sp|P13073|COX41_HUMAN Cytochrome c oxidase subunit 4 isoform 1, mitochondrial OS=Homo sapiens OX=9606 GN=COX4I1 PE=1 SV=1;tr|H3BN72|H3BN72_HUMAN Cytochrome c oxidase subunit 4 isoform 1, mitochondrial OS=Homo sapiens OX=9606 GN=COX4I1 PE=1 SV=1;tr|H3BNV9|H	124670000	115710000	116670000	131270000	103960000	100670000	102650000	119930000
sp|P13639|EF2_HUMAN;tr|Q8TA90|Q8TA90_HUMAN;tr|B4DPU3|B4DPU3_HUMAN;tr|Q6PK56|Q6PK56_HUMAN;tr|B4DRE8|B4DRE8_HUMAN;tr|B4DMC6|B4DMC6_HUMAN;tr|Q6W6M8|Q6W6M8_HUMAN	sp|P13639|EF2_HUMAN;tr|Q8TA90|Q8TA90_HUMAN;tr|B4DPU3|B4DPU3_HUMAN;tr|Q6PK56|Q6PK56_HUMAN	sp|P13639|EF2_HUMAN Elongation factor 2 OS=Homo sapiens OX=9606 GN=EEF2 PE=1 SV=4;tr|Q8TA90|Q8TA90_HUMAN Similar to Elongation factor 2b (Fragment) OS=Homo sapiens OX=9606 PE=2 SV=1;tr|B4DPU3|B4DPU3_HUMAN cDNA FLJ56548, highly similar to Elongation factor	2638000000	2564500000	2489300000	2547800000	3714600000	3544000000	3449000000	3489300000
sp|P13645|K1C10_HUMAN;CON__P13645;CON__P02535-1;sp|Q7Z3Y7|K1C28_HUMAN;CON__Q148H6;CON__Q7Z3Y7;sp|Q7Z3Z0|K1C25_HUMAN;CON__Q7Z3Z0;sp|Q7Z3Y8|K1C27_HUMAN;CON__Q7Z3Y8	sp|P13645|K1C10_HUMAN;CON__P13645	sp|P13645|K1C10_HUMAN Keratin, type I cytoskeletal 10 OS=Homo sapiens OX=9606 GN=KRT10 PE=1 SV=6;	225840000	522220000	453630000	402000000	258600000	260360000	102090000	301830000
sp|P13726|TF_HUMAN;tr|B2R6M5|B2R6M5_HUMAN;tr|Q8NCW7|Q8NCW7_HUMAN;tr|Q86SE7|Q86SE7_HUMAN	sp|P13726|TF_HUMAN;tr|B2R6M5|B2R6M5_HUMAN;tr|Q8NCW7|Q8NCW7_HUMAN;tr|Q86SE7|Q86SE7_HUMAN	sp|P13726|TF_HUMAN Tissue factor OS=Homo sapiens OX=9606 GN=F3 PE=1 SV=1;tr|B2R6M5|B2R6M5_HUMAN Tissue factor OS=Homo sapiens OX=9606 PE=2 SV=1;tr|Q8NCW7|Q8NCW7_HUMAN Tissue factor (Fragment) OS=Homo sapiens OX=9606 PE=2 SV=1;tr|Q86SE7|Q86SE7_HUMAN Tissue	32103000	29407000	34384000	40081000	35218000	35355000	32103000	33949000
sp|P13797|PLST_HUMAN;tr|B4DPW9|B4DPW9_HUMAN;tr|Q53GY0|Q53GY0_HUMAN;tr|A0A0A0MSQ0|A0A0A0MSQ0_HUMAN;tr|Q96HI1|Q96HI1_HUMAN;tr|B4DG31|B4DG31_HUMAN;tr|U3KQI3|U3KQI3_HUMAN;tr|B4DPU6|B4DPU6_HUMAN;tr|H7C4N2|H7C4N2_HUMAN;tr|B4DI60|B4DI60_HUMAN;tr|A7E2S2|A7E2S2_HUMAN;tr|F2Z2Z9|F2Z2Z9_HUMAN	sp|P13797|PLST_HUMAN;tr|B4DPW9|B4DPW9_HUMAN;tr|Q53GY0|Q53GY0_HUMAN;tr|A0A0A0MSQ0|A0A0A0MSQ0_HUMAN;tr|Q96HI1|Q96HI1_HUMAN	sp|P13797|PLST_HUMAN Plastin-3 OS=Homo sapiens OX=9606 GN=PLS3 PE=1 SV=4;tr|B4DPW9|B4DPW9_HUMAN cDNA FLJ51929, highly similar to Plastin-3 OS=Homo sapiens OX=9606 PE=2 SV=1;tr|Q53GY0|Q53GY0_HUMAN Plastin 3 variant (Fragment) OS=Homo sapiens OX=9606 PE=2 SV	989370000	976110000	964560000	975520000	1038100000	1069300000	1091400000	1119800000
sp|P14324|FPPS_HUMAN;tr|A0A087X090|A0A087X090_HUMAN;tr|A0A087WVN4|A0A087WVN4_HUMAN;tr|B3KMW3|B3KMW3_HUMAN;tr|A0A087X1D8|A0A087X1D8_HUMAN;tr|Q14329|Q14329_HUMAN;tr|A0A087WTP2|A0A087WTP2_HUMAN	sp|P14324|FPPS_HUMAN;tr|A0A087X090|A0A087X090_HUMAN;tr|A0A087WVN4|A0A087WVN4_HUMAN	sp|P14324|FPPS_HUMAN Farnesyl pyrophosphate synthase OS=Homo sapiens OX=9606 GN=FDPS PE=1 SV=4;tr|A0A087X090|A0A087X090_HUMAN Farnesyl diphosphate synthase (Farnesyl pyrophosphate synthetase, dimethylallyltranstransferase, geranyltranstransferase), isoform	193270000	198630000	184540000	211380000	230080000	226260000	220650000	231300000
sp|P14735|IDE_HUMAN;tr|Q59GA5|Q59GA5_HUMAN;tr|Q5T5N3|Q5T5N3_HUMAN;tr|B7Z7W6|B7Z7W6_HUMAN;tr|B3KSB8|B3KSB8_HUMAN	sp|P14735|IDE_HUMAN	sp|P14735|IDE_HUMAN Insulin-degrading enzyme OS=Homo sapiens OX=9606 GN=IDE PE=1 SV=4	26099000	36189000	44545000	24088000	37390000	32831000	31644000	36970000
sp|P14854|CX6B1_HUMAN;tr|K7EQD3|K7EQD3_HUMAN	sp|P14854|CX6B1_HUMAN	sp|P14854|CX6B1_HUMAN Cytochrome c oxidase subunit 6B1 OS=Homo sapiens OX=9606 GN=COX6B1 PE=1 SV=2	111460000	111990000	85889000	101430000	96069000	92033000	93913000	87650000
sp|P15531|NDKA_HUMAN	sp|P15531|NDKA_HUMAN	sp|P15531|NDKA_HUMAN Nucleoside diphosphate kinase A OS=Homo sapiens OX=9606 GN=NME1 PE=1 SV=1	222140000	223660000	244100000	245000000	206000000	205270000	247500000	236640000
sp|P15880|RS2_HUMAN;tr|Q3KQT6|Q3KQT6_HUMAN;tr|Q8N5L9|Q8N5L9_HUMAN;tr|Q6IPX5|Q6IPX5_HUMAN;tr|Q8J014|Q8J014_HUMAN;tr|E9PQD7|E9PQD7_HUMAN;tr|H0YEN5|H0YEN5_HUMAN;tr|Q9BSW5|Q9BSW5_HUMAN;tr|E9PMM9|E9PMM9_HUMAN;tr|I3L404|I3L404_HUMAN;tr|E9PPT0|E9PPT0_HUMAN;tr|Q8NI61|Q8NI61_HUMAN;tr|O60249|O60249_HUMAN;tr|E9PM36|E9PM36_HUMAN;tr|D3DU83|D3DU83_HUMAN;tr|A4D0Y7|A4D0Y7_HUMAN;tr|H3BNG3|H3BNG3_HUMAN;tr|H0YE27|H…	sp|P15880|RS2_HUMAN;tr|Q3KQT6|Q3KQT6_HUMAN;tr|Q8N5L9|Q8N5L9_HUMAN;tr|Q6IPX5|Q6IPX5_HUMAN;tr|Q8J014|Q8J014_HUMAN;tr|E9PQD7|E9PQD7_HUMAN;tr|H0YEN5|H0YEN5_HUMAN;tr|Q9BSW5|Q9BSW5_HUMAN;tr|E9PMM9|E9PMM9_HUMAN	sp|P15880|RS2_HUMAN 40S ribosomal protein S2 OS=Homo sapiens OX=9606 GN=RPS2 PE=1 SV=2;tr|Q3KQT6|Q3KQT6_HUMAN Ribosomal protein S2 OS=Homo sapiens OX=9606 GN=RPS2 PE=2 SV=1;tr|Q8N5L9|Q8N5L9_HUMAN Ribosomal protein S2 OS=Homo sapiens OX=9606 GN=RPS2 PE=2 SV	527020000	606300000	654310000	644230000	532050000	554830000	683340000	607210000
sp|P15924|DESP_HUMAN;tr|Q4LE79|Q4LE79_HUMAN;tr|B4E2A0|B4E2A0_HUMAN;tr|B4DKX6|B4DKX6_HUMAN;tr|B4DWT7|B4DWT7_HUMAN;tr|G1UI31|G1UI31_HUMAN;tr|Q6ZP16|Q6ZP16_HUMAN	sp|P15924|DESP_HUMAN;tr|Q4LE79|Q4LE79_HUMAN	sp|P15924|DESP_HUMAN Desmoplakin OS=Homo sapiens OX=9606 GN=DSP PE=1 SV=3;tr|Q4LE79|Q4LE79_HUMAN DSP variant protein (Fragment) OS=Homo sapiens OX=9606 GN=DSP variant protein PE=2 SV=1	67692000	67171000	68997000	70047000	60633000	51638000	58060000	55126000
sp|P16152|CBR1_HUMAN;tr|E9PQ63|E9PQ63_HUMAN;tr|A8MTM1|A8MTM1_HUMAN	sp|P16152|CBR1_HUMAN;tr|E9PQ63|E9PQ63_HUMAN;tr|A8MTM1|A8MTM1_HUMAN	sp|P16152|CBR1_HUMAN Carbonyl reductase [NADPH] 1 OS=Homo sapiens OX=9606 GN=CBR1 PE=1 SV=3;tr|E9PQ63|E9PQ63_HUMAN Carbonyl reductase [NADPH] 1 OS=Homo sapiens OX=9606 GN=CBR1 PE=1 SV=1;tr|A8MTM1|A8MTM1_HUMAN Carbonyl reductase [NADPH] 1 OS=Homo sapiens OX	319740000	310830000	261670000	298310000	425250000	372460000	356220000	366620000
sp|P16403|H12_HUMAN	sp|P16403|H12_HUMAN	sp|P16403|H12_HUMAN Histone H1.2 OS=Homo sapiens OX=9606 GN=HIST1H1C PE=1 SV=2	1317100000	1433900000	1870400000	2288100000	328140000	838050000	1546000000	1270700000
sp|P16930|FAAA_HUMAN;tr|H0YLC7|H0YLC7_HUMAN;tr|B7Z4W2|B7Z4W2_HUMAN;tr|H3BNP8|H3BNP8_HUMAN	sp|P16930|FAAA_HUMAN	sp|P16930|FAAA_HUMAN Fumarylacetoacetase OS=Homo sapiens OX=9606 GN=FAH PE=1 SV=2	21960000	22845000	20304000	19430000	24176000	22754000	23065000	24475000
sp|P17096|HMGA1_HUMAN;tr|B4DWA0|B4DWA0_HUMAN;tr|A0A024RCT9|A0A024RCT9_HUMAN	sp|P17096|HMGA1_HUMAN;tr|B4DWA0|B4DWA0_HUMAN;tr|A0A024RCT9|A0A024RCT9_HUMAN	sp|P17096|HMGA1_HUMAN High mobility group protein HMG-I/HMG-Y OS=Homo sapiens OX=9606 GN=HMGA1 PE=1 SV=3;tr|B4DWA0|B4DWA0_HUMAN cDNA FLJ54188, moderately similar to High mobility group protein HMG-I/HMG-Y OS=Homo sapiens OX=9606 PE=2 SV=1;tr|A0A024RCT9|A0A	958410000	982410000	930440000	1196100000	971660000	759880000	1210000000	1169400000
sp|P17301|ITA2_HUMAN;tr|Q71V33|Q71V33_HUMAN;tr|A0A0X8AZ85|A0A0X8AZ85_HUMAN;tr|D6RG08|D6RG08_HUMAN;tr|Q16183|Q16183_HUMAN;tr|F1C627|F1C627_HUMAN	sp|P17301|ITA2_HUMAN	sp|P17301|ITA2_HUMAN Integrin alpha-2 OS=Homo sapiens OX=9606 GN=ITGA2 PE=1 SV=1	269110000	255190000	258420000	244200000	244670000	232280000	197350000	222990000
sp|P17812|PYRG1_HUMAN;tr|B4DMB5|B4DMB5_HUMAN;tr|B4E1E0|B4E1E0_HUMAN;tr|B7Z9C4|B7Z9C4_HUMAN;tr|A0A024RC00|A0A024RC00_HUMAN;sp|Q9NRF8|PYRG2_HUMAN	sp|P17812|PYRG1_HUMAN;tr|B4DMB5|B4DMB5_HUMAN;tr|B4E1E0|B4E1E0_HUMAN	sp|P17812|PYRG1_HUMAN CTP synthase 1 OS=Homo sapiens OX=9606 GN=CTPS1 PE=1 SV=2;tr|B4DMB5|B4DMB5_HUMAN CTP synthase OS=Homo sapiens OX=9606 PE=2 SV=1;tr|B4E1E0|B4E1E0_HUMAN CTP synthase OS=Homo sapiens OX=9606 PE=2 SV=1	95112000	99549000	100690000	91758000	85185000	90792000	92053000	92494000
sp|P17858|PFKAL_HUMAN;tr|Q9BSP4|Q9BSP4_HUMAN;tr|Q7L2M7|Q7L2M7_HUMAN;tr|B3KNQ7|B3KNQ7_HUMAN;tr|B4E108|B4E108_HUMAN;tr|Q6MZK4|Q6MZK4_HUMAN;tr|Q59GI2|Q59GI2_HUMAN;tr|Q7Z3R9|Q7Z3R9_HUMAN	sp|P17858|PFKAL_HUMAN;tr|Q9BSP4|Q9BSP4_HUMAN;tr|Q7L2M7|Q7L2M7_HUMAN	sp|P17858|PFKAL_HUMAN ATP-dependent 6-phosphofructokinase, liver type OS=Homo sapiens OX=9606 GN=PFKL PE=1 SV=6;tr|Q9BSP4|Q9BSP4_HUMAN PFKL protein (Fragment) OS=Homo sapiens OX=9606 GN=PFKL PE=2 SV=2;tr|Q7L2M7|Q7L2M7_HUMAN PFKL protein (Fragment) OS=Homo	143720000	140150000	138170000	131850000	118350000	125350000	141520000	125100000
sp|P17987|TCPA_HUMAN;tr|E7ERF2|E7ERF2_HUMAN;tr|E7EQR6|E7EQR6_HUMAN;tr|F5H282|F5H282_HUMAN;tr|F5H136|F5H136_HUMAN;tr|F5GZ03|F5GZ03_HUMAN;tr|F5GZI8|F5GZI8_HUMAN;tr|F5H676|F5H676_HUMAN;tr|F5H726|F5H726_HUMAN;tr|F5H7Y1|F5H7Y1_HUMAN;tr|F5GYL4|F5GYL4_HUMAN	sp|P17987|TCPA_HUMAN;tr|E7ERF2|E7ERF2_HUMAN;tr|E7EQR6|E7EQR6_HUMAN;tr|F5H282|F5H282_HUMAN	sp|P17987|TCPA_HUMAN T-complex protein 1 subunit alpha OS=Homo sapiens OX=9606 GN=TCP1 PE=1 SV=1;tr|E7ERF2|E7ERF2_HUMAN T-complex protein 1 subunit alpha OS=Homo sapiens OX=9606 GN=TCP1 PE=1 SV=1;tr|E7EQR6|E7EQR6_HUMAN T-complex protein 1 subunit alpha OS=	1173500000	1115800000	1158800000	1137100000	1171800000	1228200000	1175800000	1225100000
sp|P18077|RL35A_HUMAN;tr|F8WBS5|F8WBS5_HUMAN;tr|F8WB72|F8WB72_HUMAN;tr|C9K025|C9K025_HUMAN	sp|P18077|RL35A_HUMAN;tr|F8WBS5|F8WBS5_HUMAN;tr|F8WB72|F8WB72_HUMAN;tr|C9K025|C9K025_HUMAN	sp|P18077|RL35A_HUMAN 60S ribosomal protein L35a OS=Homo sapiens OX=9606 GN=RPL35A PE=1 SV=2;tr|F8WBS5|F8WBS5_HUMAN 60S ribosomal protein L35a OS=Homo sapiens OX=9606 GN=RPL35A PE=1 SV=1;tr|F8WB72|F8WB72_HUMAN 60S ribosomal protein L35a OS=Homo sapiens OX=	142370000	144340000	182490000	204260000	156880000	112730000	167380000	175850000
sp|P18085|ARF4_HUMAN;tr|C9JPM4|C9JPM4_HUMAN;tr|C9JAK5|C9JAK5_HUMAN;tr|U3KQF2|U3KQF2_HUMAN;tr|F5H1V1|F5H1V1_HUMAN;tr|F5H6T5|F5H6T5_HUMAN;tr|F8WDB3|F8WDB3_HUMAN	sp|P18085|ARF4_HUMAN;tr|C9JPM4|C9JPM4_HUMAN;tr|C9JAK5|C9JAK5_HUMAN;tr|U3KQF2|U3KQF2_HUMAN	sp|P18085|ARF4_HUMAN ADP-ribosylation factor 4 OS=Homo sapiens OX=9606 GN=ARF4 PE=1 SV=3;tr|C9JPM4|C9JPM4_HUMAN ADP-ribosylation factor 4 (Fragment) OS=Homo sapiens OX=9606 GN=ARF4 PE=1 SV=1;tr|C9JAK5|C9JAK5_HUMAN ADP-ribosylation factor 4 OS=Homo sapiens	251440000	237890000	220280000	325130000	224390000	250840000	244550000	251730000
sp|P18124|RL7_HUMAN;tr|A0A024R814|A0A024R814_HUMAN;tr|A8MUD9|A8MUD9_HUMAN;tr|O95036|O95036_HUMAN;tr|C9JIJ5|C9JIJ5_HUMAN;tr|C9JZ88|C9JZ88_HUMAN	sp|P18124|RL7_HUMAN;tr|A0A024R814|A0A024R814_HUMAN;tr|A8MUD9|A8MUD9_HUMAN;tr|O95036|O95036_HUMAN	sp|P18124|RL7_HUMAN 60S ribosomal protein L7 OS=Homo sapiens OX=9606 GN=RPL7 PE=1 SV=1;tr|A0A024R814|A0A024R814_HUMAN Ribosomal protein L7, isoform CRA_a OS=Homo sapiens OX=9606 GN=RPL7 PE=4 SV=1;tr|A8MUD9|A8MUD9_HUMAN 60S ribosomal protein L7 OS=Homo sapi	473880000	495750000	608950000	616900000	480370000	608920000	540350000	460630000
sp|P18583|SON_HUMAN;tr|D3DSF7|D3DSF7_HUMAN;tr|H7C1M2|H7C1M2_HUMAN;tr|Q3SWV4|Q3SWV4_HUMAN;tr|A0JLP4|A0JLP4_HUMAN;tr|Q6ZRV7|Q6ZRV7_HUMAN;tr|J3QSZ5|J3QSZ5_HUMAN;tr|B3KRA1|B3KRA1_HUMAN	sp|P18583|SON_HUMAN;tr|D3DSF7|D3DSF7_HUMAN	sp|P18583|SON_HUMAN Protein SON OS=Homo sapiens OX=9606 GN=SON PE=1 SV=4;tr|D3DSF7|D3DSF7_HUMAN SON DNA binding protein, isoform CRA_b OS=Homo sapiens OX=9606 GN=SON PE=4 SV=1	85717000	87933000	82504000	97838000	82245000	77093000	76132000	89324000
sp|P19623|SPEE_HUMAN;tr|K7ESL0|K7ESL0_HUMAN;tr|K7EKM4|K7EKM4_HUMAN;tr|K7EQ47|K7EQ47_HUMAN;tr|K7EL89|K7EL89_HUMAN	sp|P19623|SPEE_HUMAN	sp|P19623|SPEE_HUMAN Spermidine synthase OS=Homo sapiens OX=9606 GN=SRM PE=1 SV=1	203030000	201620000	173280000	176740000	192740000	181710000	192900000	196710000
sp|P20290|BTF3_HUMAN;tr|H0Y9Y1|H0Y9Y1_HUMAN	sp|P20290|BTF3_HUMAN	sp|P20290|BTF3_HUMAN Transcription factor BTF3 OS=Homo sapiens OX=9606 GN=BTF3 PE=1 SV=1	179800000	161650000	166610000	201490000	199730000	228080000	225400000	201610000
sp|P20674|COX5A_HUMAN;tr|H3BNX8|H3BNX8_HUMAN;tr|Q71UP1|Q71UP1_HUMAN;tr|H3BRM5|H3BRM5_HUMAN;tr|H3BRI0|H3BRI0_HUMAN;tr|H3BV69|H3BV69_HUMAN	sp|P20674|COX5A_HUMAN;tr|H3BNX8|H3BNX8_HUMAN	sp|P20674|COX5A_HUMAN Cytochrome c oxidase subunit 5A, mitochondrial OS=Homo sapiens OX=9606 GN=COX5A PE=1 SV=2;tr|H3BNX8|H3BNX8_HUMAN Cytochrome c oxidase subunit 5A, mitochondrial OS=Homo sapiens OX=9606 GN=COX5A PE=1 SV=1	69363000	94145000	79356000	154710000	77204000	69572000	102560000	61384000
sp|P20700|LMNB1_HUMAN;tr|E9PBF6|E9PBF6_HUMAN;tr|A0A0D9SFE5|A0A0D9SFE5_HUMAN;tr|Q6DC98|Q6DC98_HUMAN;tr|B4DZT3|B4DZT3_HUMAN;tr|A0A0D9SFY5|A0A0D9SFY5_HUMAN	sp|P20700|LMNB1_HUMAN;tr|E9PBF6|E9PBF6_HUMAN;tr|A0A0D9SFE5|A0A0D9SFE5_HUMAN;tr|Q6DC98|Q6DC98_HUMAN;tr|B4DZT3|B4DZT3_HUMAN	sp|P20700|LMNB1_HUMAN Lamin-B1 OS=Homo sapiens OX=9606 GN=LMNB1 PE=1 SV=2;tr|E9PBF6|E9PBF6_HUMAN Lamin-B1 OS=Homo sapiens OX=9606 GN=LMNB1 PE=1 SV=1;tr|A0A0D9SFE5|A0A0D9SFE5_HUMAN Lamin B1, isoform CRA_a OS=Homo sapiens OX=9606 GN=LMNB1 PE=1 SV=1;tr|Q6DC98	779990000	760380000	703960000	668260000	662560000	634360000	613870000	680190000
sp|P21333|FLNA_HUMAN;tr|Q5HY54|Q5HY54_HUMAN;tr|Q8TES4|Q8TES4_HUMAN;tr|Q6NXF2|Q6NXF2_HUMAN;tr|Q96C61|Q96C61_HUMAN;tr|B4E2F9|B4E2F9_HUMAN;tr|B4DTD5|B4DTD5_HUMAN;tr|F8WE98|F8WE98_HUMAN;tr|Q86TQ3|Q86TQ3_HUMAN;tr|Q2VP91|Q2VP91_HUMAN;tr|H0Y5C6|H0Y5C6_HUMAN;tr|H0Y5F3|H0Y5F3_HUMAN;tr|H7C2E7|H7C2E7_HUMAN	sp|P21333|FLNA_HUMAN;tr|Q5HY54|Q5HY54_HUMAN;tr|Q8TES4|Q8TES4_HUMAN	sp|P21333|FLNA_HUMAN Filamin-A OS=Homo sapiens OX=9606 GN=FLNA PE=1 SV=4;tr|Q5HY54|Q5HY54_HUMAN Filamin-A OS=Homo sapiens OX=9606 GN=FLNA PE=1 SV=1;tr|Q8TES4|Q8TES4_HUMAN FLJ00119 protein (Fragment) OS=Homo sapiens OX=9606 GN=FLJ00119 PE=2 SV=1	7488200000	7278900000	7265100000	7040000000	6575200000	6388600000	6487000000	6754900000
sp|P22059|OSBP1_HUMAN;tr|B4DR25|B4DR25_HUMAN;tr|H0YCV6|H0YCV6_HUMAN;tr|H7C1R2|H7C1R2_HUMAN;tr|H7C368|H7C368_HUMAN;tr|A0A024R1L4|A0A024R1L4_HUMAN;tr|H7C428|H7C428_HUMAN;tr|A0A0A0MSB4|A0A0A0MSB4_HUMAN;tr|Q6ZN50|Q6ZN50_HUMAN;sp|Q969R2|OSBP2_HUMAN	sp|P22059|OSBP1_HUMAN;tr|B4DR25|B4DR25_HUMAN	sp|P22059|OSBP1_HUMAN Oxysterol-binding protein 1 OS=Homo sapiens OX=9606 GN=OSBP PE=1 SV=1;tr|B4DR25|B4DR25_HUMAN Oxysterol-binding protein OS=Homo sapiens OX=9606 PE=2 SV=1	50180000	49911000	58054000	56698000	41627000	39067000	43974000	58646000
sp|P22061|PIMT_HUMAN;tr|A0A0A0MRJ6|A0A0A0MRJ6_HUMAN;tr|H7BY58|H7BY58_HUMAN;tr|F6S8N6|F6S8N6_HUMAN;tr|B7Z972|B7Z972_HUMAN;tr|F8WDT3|F8WDT3_HUMAN;tr|F8WAV5|F8WAV5_HUMAN;tr|F8WAX2|F8WAX2_HUMAN;tr|C9J0F2|C9J0F2_HUMAN	sp|P22061|PIMT_HUMAN;tr|A0A0A0MRJ6|A0A0A0MRJ6_HUMAN;tr|H7BY58|H7BY58_HUMAN;tr|F6S8N6|F6S8N6_HUMAN;tr|B7Z972|B7Z972_HUMAN	sp|P22061|PIMT_HUMAN Protein-L-isoaspartate(D-aspartate) O-methyltransferase OS=Homo sapiens OX=9606 GN=PCMT1 PE=1 SV=4;tr|A0A0A0MRJ6|A0A0A0MRJ6_HUMAN Protein-L-isoaspartate O-methyltransferase OS=Homo sapiens OX=9606 GN=PCMT1 PE=1 SV=1;tr|H7BY58|H7BY58_HU	156500000	149650000	146790000	145140000	136700000	152650000	140870000	131060000
sp|P22413|ENPP1_HUMAN;tr|B2RBY8|B2RBY8_HUMAN;tr|E9PE72|E9PE72_HUMAN;tr|Q7Z3P5|Q7Z3P5_HUMAN;tr|Q9NS95|Q9NS95_HUMAN	sp|P22413|ENPP1_HUMAN;tr|B2RBY8|B2RBY8_HUMAN	sp|P22413|ENPP1_HUMAN Ectonucleotide pyrophosphatase/phosphodiesterase family member 1 OS=Homo sapiens OX=9606 GN=ENPP1 PE=1 SV=2;tr|B2RBY8|B2RBY8_HUMAN cDNA, FLJ95771, highly similar to Homo sapiens ectonucleotide pyrophosphatase/phosphodiesterase 1 (ENPP	112530000	103500000	91919000	102360000	93937000	82500000	77261000	82112000
sp|P22626|ROA2_HUMAN;tr|A0A087WUI2|A0A087WUI2_HUMAN;tr|I6L957|I6L957_HUMAN;tr|A0A024RA28|A0A024RA28_HUMAN	sp|P22626|ROA2_HUMAN;tr|A0A087WUI2|A0A087WUI2_HUMAN;tr|I6L957|I6L957_HUMAN;tr|A0A024RA28|A0A024RA28_HUMAN	sp|P22626|ROA2_HUMAN Heterogeneous nuclear ribonucleoproteins A2/B1 OS=Homo sapiens OX=9606 GN=HNRNPA2B1 PE=1 SV=2;tr|A0A087WUI2|A0A087WUI2_HUMAN Heterogeneous nuclear ribonucleoproteins A2/B1 OS=Homo sapiens OX=9606 GN=HNRNPA2B1 PE=1 SV=1;tr|I6L957|I6L957	4378600000	4148800000	4068600000	4366200000	3913200000	3808900000	3682000000	3976600000
sp|P22695|QCR2_HUMAN;tr|H3BRG4|H3BRG4_HUMAN;tr|H3BSJ9|H3BSJ9_HUMAN;tr|H3BP04|H3BP04_HUMAN;tr|H3BUE4|H3BUE4_HUMAN;tr|H3BUI9|H3BUI9_HUMAN	sp|P22695|QCR2_HUMAN;tr|H3BRG4|H3BRG4_HUMAN;tr|H3BSJ9|H3BSJ9_HUMAN	sp|P22695|QCR2_HUMAN Cytochrome b-c1 complex subunit 2, mitochondrial OS=Homo sapiens OX=9606 GN=UQCRC2 PE=1 SV=3;tr|H3BRG4|H3BRG4_HUMAN Cytochrome b-c1 complex subunit 2, mitochondrial OS=Homo sapiens OX=9606 GN=UQCRC2 PE=1 SV=1;tr|H3BSJ9|H3BSJ9_HUMAN Cyt	93293000	92392000	86286000	89836000	92199000	100670000	83126000	92604000
sp|P23229|ITA6_HUMAN;tr|C9JXX7|C9JXX7_HUMAN;tr|H7BZ97|H7BZ97_HUMAN	sp|P23229|ITA6_HUMAN	sp|P23229|ITA6_HUMAN Integrin alpha-6 OS=Homo sapiens OX=9606 GN=ITGA6 PE=1 SV=5	191710000	190200000	173960000	180240000	163670000	147990000	167800000	159790000
sp|P23246|SFPQ_HUMAN;tr|Q9BSV4|Q9BSV4_HUMAN;tr|Q86VG2|Q86VG2_HUMAN;tr|Q6PIX2|Q6PIX2_HUMAN;tr|H0Y9K7|H0Y9K7_HUMAN;tr|H0Y9U2|H0Y9U2_HUMAN	sp|P23246|SFPQ_HUMAN;tr|Q9BSV4|Q9BSV4_HUMAN;tr|Q86VG2|Q86VG2_HUMAN;tr|Q6PIX2|Q6PIX2_HUMAN	sp|P23246|SFPQ_HUMAN Splicing factor, proline- and glutamine-rich OS=Homo sapiens OX=9606 GN=SFPQ PE=1 SV=2;tr|Q9BSV4|Q9BSV4_HUMAN SFPQ protein (Fragment) OS=Homo sapiens OX=9606 GN=SFPQ PE=2 SV=2;tr|Q86VG2|Q86VG2_HUMAN Splicing factor proline/glutamine-ri	1058400000	997000000	945410000	963920000	1057700000	1026300000	953370000	1023200000
sp|P23258|TBG1_HUMAN;sp|Q9NRH3|TBG2_HUMAN;tr|K7EIS0|K7EIS0_HUMAN;tr|A0A1B4Z394|A0A1B4Z394_HUMAN;tr|K7EKE5|K7EKE5_HUMAN	sp|P23258|TBG1_HUMAN;sp|Q9NRH3|TBG2_HUMAN;tr|K7EIS0|K7EIS0_HUMAN;tr|A0A1B4Z394|A0A1B4Z394_HUMAN;tr|K7EKE5|K7EKE5_HUMAN	sp|P23258|TBG1_HUMAN Tubulin gamma-1 chain OS=Homo sapiens OX=9606 GN=TUBG1 PE=1 SV=2;sp|Q9NRH3|TBG2_HUMAN Tubulin gamma-2 chain OS=Homo sapiens OX=9606 GN=TUBG2 PE=2 SV=1;tr|K7EIS0|K7EIS0_HUMAN Tubulin gamma chain (Fragment) OS=Homo sapiens OX=9606 GN=TUB	43467000	47993000	45347000	48819000	49965000	42299000	45847000	50433000
sp|P23396|RS3_HUMAN;tr|Q53G83|Q53G83_HUMAN;tr|E9PL09|E9PL09_HUMAN;tr|E9PPU1|E9PPU1_HUMAN;tr|H0YEU2|H0YEU2_HUMAN;tr|Q9NQS8|Q9NQS8_HUMAN;tr|F2Z2S8|F2Z2S8_HUMAN;tr|H0YCJ7|H0YCJ7_HUMAN;tr|A7E2S3|A7E2S3_HUMAN;tr|H0YF32|H0YF32_HUMAN;tr|E9PQ96|E9PQ96_HUMAN;tr|E9PSF4|E9PSF4_HUMAN;tr|E9PJH4|E9PJH4_HUMAN;tr|E9PK82|E9PK82_HUMAN;tr|E9PQX2|E9PQX2_HUMAN;tr|H0YES8|H0YES8_HUMAN;tr|E9PJN9|E9PJN9_HUMAN;tr|A3FCB9|A…	sp|P23396|RS3_HUMAN;tr|Q53G83|Q53G83_HUMAN;tr|E9PL09|E9PL09_HUMAN;tr|E9PPU1|E9PPU1_HUMAN;tr|H0YEU2|H0YEU2_HUMAN;tr|Q9NQS8|Q9NQS8_HUMAN;tr|F2Z2S8|F2Z2S8_HUMAN;tr|H0YCJ7|H0YCJ7_HUMAN	sp|P23396|RS3_HUMAN 40S ribosomal protein S3 OS=Homo sapiens OX=9606 GN=RPS3 PE=1 SV=2;tr|Q53G83|Q53G83_HUMAN Ribosomal protein S3 variant (Fragment) OS=Homo sapiens OX=9606 PE=2 SV=1;tr|E9PL09|E9PL09_HUMAN 40S ribosomal protein S3 OS=Homo sapiens OX=9606	912340000	1000100000	1106600000	1163400000	870810000	1009300000	1086700000	1125100000
sp|P23526|SAHH_HUMAN;tr|Q1RMG2|Q1RMG2_HUMAN	sp|P23526|SAHH_HUMAN;tr|Q1RMG2|Q1RMG2_HUMAN	sp|P23526|SAHH_HUMAN Adenosylhomocysteinase OS=Homo sapiens OX=9606 GN=AHCY PE=1 SV=4;tr|Q1RMG2|Q1RMG2_HUMAN Adenosylhomocysteinase OS=Homo sapiens OX=9606 GN=AHCY PE=2 SV=1	1049400000	1004400000	960580000	1039400000	1059300000	978260000	934120000	1033600000
sp|P25398|RS12_HUMAN	sp|P25398|RS12_HUMAN	sp|P25398|RS12_HUMAN 40S ribosomal protein S12 OS=Homo sapiens OX=9606 GN=RPS12 PE=1 SV=3	756500000	707380000	627310000	515430000	848430000	867580000	819580000	791210000
sp|P25786|PSA1_HUMAN;tr|V9HW55|V9HW55_HUMAN;tr|F5GX11|F5GX11_HUMAN;tr|B4E0X6|B4E0X6_HUMAN;tr|B4DEV8|B4DEV8_HUMAN	sp|P25786|PSA1_HUMAN;tr|V9HW55|V9HW55_HUMAN;tr|F5GX11|F5GX11_HUMAN	sp|P25786|PSA1_HUMAN Proteasome subunit alpha type-1 OS=Homo sapiens OX=9606 GN=PSMA1 PE=1 SV=1;tr|V9HW55|V9HW55_HUMAN Proteasome endopeptidase complex OS=Homo sapiens OX=9606 GN=HEL-S-275 PE=2 SV=1;tr|F5GX11|F5GX11_HUMAN Proteasome endopeptidase complex O	432860000	404930000	408110000	411560000	420730000	412870000	377790000	391050000
sp|P25789|PSA4_HUMAN;tr|H0YMZ1|H0YMZ1_HUMAN;tr|H0YL69|H0YL69_HUMAN;tr|B2RDG0|B2RDG0_HUMAN;tr|H0YMA1|H0YMA1_HUMAN;tr|H0YN18|H0YN18_HUMAN;tr|H0YLC2|H0YLC2_HUMAN;tr|H0YKT8|H0YKT8_HUMAN;tr|H0YMI6|H0YMI6_HUMAN;tr|H0YKS0|H0YKS0_HUMAN;tr|H0YLS6|H0YLS6_HUMAN;tr|H0YMV3|H0YMV3_HUMAN	sp|P25789|PSA4_HUMAN;tr|H0YMZ1|H0YMZ1_HUMAN;tr|H0YL69|H0YL69_HUMAN;tr|B2RDG0|B2RDG0_HUMAN;tr|H0YMA1|H0YMA1_HUMAN;tr|H0YN18|H0YN18_HUMAN;tr|H0YLC2|H0YLC2_HUMAN;tr|H0YKT8|H0YKT8_HUMAN;tr|H0YMI6|H0YMI6_HUMAN	sp|P25789|PSA4_HUMAN Proteasome subunit alpha type-4 OS=Homo sapiens OX=9606 GN=PSMA4 PE=1 SV=1;tr|H0YMZ1|H0YMZ1_HUMAN Proteasome subunit alpha type (Fragment) OS=Homo sapiens OX=9606 GN=PSMA4 PE=1 SV=8;tr|H0YL69|H0YL69_HUMAN Proteasome subunit alpha type	452300000	432480000	419930000	401260000	479180000	464920000	433370000	437390000
sp|P26368|U2AF2_HUMAN;tr|B5BU25|B5BU25_HUMAN;tr|K7ENG2|K7ENG2_HUMAN;tr|K7ELP8|K7ELP8_HUMAN	sp|P26368|U2AF2_HUMAN;tr|B5BU25|B5BU25_HUMAN;tr|K7ENG2|K7ENG2_HUMAN	sp|P26368|U2AF2_HUMAN Splicing factor U2AF 65 kDa subunit OS=Homo sapiens OX=9606 GN=U2AF2 PE=1 SV=4;tr|B5BU25|B5BU25_HUMAN U2 snRNP auxiliary factor large subunit OS=Homo sapiens OX=9606 GN=U2AF2 PE=2 SV=1;tr|K7ENG2|K7ENG2_HUMAN U2 snRNP auxiliary factor	354670000	337190000	296460000	374180000	285750000	341070000	351230000	350560000
sp|P26447|S10A4_HUMAN	sp|P26447|S10A4_HUMAN	sp|P26447|S10A4_HUMAN Protein S100-A4 OS=Homo sapiens OX=9606 GN=S100A4 PE=1 SV=1	239390000	213700000	175150000	217680000	140110000	148180000	144350000	145610000
sp|P27144|KAD4_HUMAN;tr|D3DQ64|D3DQ64_HUMAN	sp|P27144|KAD4_HUMAN;tr|D3DQ64|D3DQ64_HUMAN	sp|P27144|KAD4_HUMAN Adenylate kinase 4, mitochondrial OS=Homo sapiens OX=9606 GN=AK4 PE=1 SV=1;tr|D3DQ64|D3DQ64_HUMAN Adenylate kinase 4, mitochondrial OS=Homo sapiens OX=9606 GN=AK4 PE=1 SV=1	65193000	51944000	51861000	54684000	51033000	46736000	33702000	44823000
sp|P27694|RFA1_HUMAN;tr|I3L4R8|I3L4R8_HUMAN;tr|I3L524|I3L524_HUMAN;tr|I3L2M5|I3L2M5_HUMAN	sp|P27694|RFA1_HUMAN	sp|P27694|RFA1_HUMAN Replication protein A 70 kDa DNA-binding subunit OS=Homo sapiens OX=9606 GN=RPA1 PE=1 SV=2	100210000	109120000	100360000	104860000	112840000	106250000	111940000	110910000
sp|P27816|MAP4_HUMAN;tr|E7EVA0|E7EVA0_HUMAN;tr|B4DM10|B4DM10_HUMAN;tr|A0A024R2V2|A0A024R2V2_HUMAN;tr|A0A024R2S1|A0A024R2S1_HUMAN;tr|Q6NX68|Q6NX68_HUMAN;tr|A0A024R2V0|A0A024R2V0_HUMAN;tr|Q05D06|Q05D06_HUMAN;tr|Q86Y04|Q86Y04_HUMAN;tr|H7C456|H7C456_HUMAN;tr|H0Y2V1|H0Y2V1_HUMAN;tr|B5MEG9|B5MEG9_HUMAN;tr|F8W9U4|F8W9U4_HUMAN;tr|B4DSQ1|B4DSQ1_HUMAN;tr|A0A0J9YVV8|A0A0J9YVV8_HUMAN;tr|A0A0J9YW37|A0A0J9YW37…	sp|P27816|MAP4_HUMAN;tr|E7EVA0|E7EVA0_HUMAN;tr|B4DM10|B4DM10_HUMAN;tr|A0A024R2V2|A0A024R2V2_HUMAN;tr|A0A024R2S1|A0A024R2S1_HUMAN	sp|P27816|MAP4_HUMAN Microtubule-associated protein 4 OS=Homo sapiens OX=9606 GN=MAP4 PE=1 SV=3;tr|E7EVA0|E7EVA0_HUMAN Microtubule-associated protein OS=Homo sapiens OX=9606 GN=MAP4 PE=1 SV=1;tr|B4DM10|B4DM10_HUMAN cDNA FLJ58263, highly similar to Microtub	992490000	983410000	1024800000	1133900000	896760000	918060000	914210000	983220000
sp|P27824|CALX_HUMAN;tr|H0Y9Q7|H0Y9Q7_HUMAN;tr|Q16094|Q16094_HUMAN;tr|D6RGY2|D6RGY2_HUMAN;tr|Q6ZP56|Q6ZP56_HUMAN;tr|D6RAU8|D6RAU8_HUMAN;tr|D6RB85|D6RB85_HUMAN;tr|D6RDP7|D6RDP7_HUMAN;tr|D6RAQ8|D6RAQ8_HUMAN;tr|D6RFL1|D6RFL1_HUMAN;tr|H0Y9H1|H0Y9H1_HUMAN;tr|D6RHJ3|D6RHJ3_HUMAN;tr|D6RD16|D6RD16_HUMAN	sp|P27824|CALX_HUMAN	sp|P27824|CALX_HUMAN Calnexin OS=Homo sapiens OX=9606 GN=CANX PE=1 SV=2	1727500000	1735900000	1622600000	1844100000	1383100000	1237000000	1527600000	1568800000
sp|P28074|PSB5_HUMAN;tr|A0A140VJS7|A0A140VJS7_HUMAN;tr|H0YJM8|H0YJM8_HUMAN	sp|P28074|PSB5_HUMAN;tr|A0A140VJS7|A0A140VJS7_HUMAN	sp|P28074|PSB5_HUMAN Proteasome subunit beta type-5 OS=Homo sapiens OX=9606 GN=PSMB5 PE=1 SV=3;tr|A0A140VJS7|A0A140VJS7_HUMAN Testicular tissue protein Li 153 OS=Homo sapiens OX=9606 PE=2 SV=1	201000000	182730000	200210000	192150000	218680000	213670000	194890000	224420000
sp|P29692|EF1D_HUMAN;tr|D3DWK1|D3DWK1_HUMAN;tr|B2RAR6|B2RAR6_HUMAN;tr|E9PRY8|E9PRY8_HUMAN;tr|E9PK01|E9PK01_HUMAN;tr|A0A087X1X7|A0A087X1X7_HUMAN;tr|Q71RH4|Q71RH4_HUMAN;tr|Q9H7G6|Q9H7G6_HUMAN;tr|E9PQZ1|E9PQZ1_HUMAN;tr|E9PQ49|E9PQ49_HUMAN;tr|E9PI39|E9PI39_HUMAN;tr|E9PPR1|E9PPR1_HUMAN;tr|E9PL12|E9PL12_HUMAN;tr|E9PMW7|E9PMW7_HUMAN;tr|E9PIZ1|E9PIZ1_HUMAN;tr|H0YE72|H0YE72_HUMAN;tr|H0YCK7|H0YCK7_HUMAN;tr…	sp|P29692|EF1D_HUMAN;tr|D3DWK1|D3DWK1_HUMAN;tr|B2RAR6|B2RAR6_HUMAN;tr|E9PRY8|E9PRY8_HUMAN;tr|E9PK01|E9PK01_HUMAN;tr|A0A087X1X7|A0A087X1X7_HUMAN;tr|Q71RH4|Q71RH4_HUMAN;tr|Q9H7G6|Q9H7G6_HUMAN;tr|E9PQZ1|E9PQZ1_HUMAN;tr|E9PQ49|E9PQ49_HUMAN;tr|E9PI39|E9PI39_HUMAN;tr|E9PPR1|E9PPR1_HUMAN;tr|E9PL12|E9PL12_HUMAN;tr|E9PMW7|E9PMW7_HUMAN	sp|P29692|EF1D_HUMAN Elongation factor 1-delta OS=Homo sapiens OX=9606 GN=EEF1D PE=1 SV=5;tr|D3DWK1|D3DWK1_HUMAN Eukaryotic translation elongation factor 1 delta (Guanine nucleotide exchange protein), isoform CRA_b OS=Homo sapiens OX=9606 GN=EEF1D PE=3 SV=	1458600000	1358600000	1334400000	1238100000	1592000000	1497900000	1473800000	1389500000
sp|P29966|MARCS_HUMAN;tr|Q6NVI1|Q6NVI1_HUMAN;tr|Q05C82|Q05C82_HUMAN	sp|P29966|MARCS_HUMAN;tr|Q6NVI1|Q6NVI1_HUMAN	sp|P29966|MARCS_HUMAN Myristoylated alanine-rich C-kinase substrate OS=Homo sapiens OX=9606 GN=MARCKS PE=1 SV=4;tr|Q6NVI1|Q6NVI1_HUMAN MARCKS protein (Fragment) OS=Homo sapiens OX=9606 GN=MARCKS PE=2 SV=1	263760000	253480000	314300000	300330000	209640000	202530000	235130000	258540000
sp|P30048|PRDX3_HUMAN;tr|Q53HC2|Q53HC2_HUMAN;tr|A4UCS5|A4UCS5_HUMAN	sp|P30048|PRDX3_HUMAN;tr|Q53HC2|Q53HC2_HUMAN	sp|P30048|PRDX3_HUMAN Thioredoxin-dependent peroxide reductase, mitochondrial OS=Homo sapiens OX=9606 GN=PRDX3 PE=1 SV=3;tr|Q53HC2|Q53HC2_HUMAN Peroxiredoxin 3 isoform a variant (Fragment) OS=Homo sapiens OX=9606 PE=2 SV=1	674150000	677830000	598990000	646600000	786420000	748830000	742670000	723150000
sp|P30050|RL12_HUMAN;tr|Q59FI9|Q59FI9_HUMAN;tr|D3DS95|D3DS95_HUMAN;tr|Q76P68|Q76P68_HUMAN	sp|P30050|RL12_HUMAN;tr|Q59FI9|Q59FI9_HUMAN;tr|D3DS95|D3DS95_HUMAN	sp|P30050|RL12_HUMAN 60S ribosomal protein L12 OS=Homo sapiens OX=9606 GN=RPL12 PE=1 SV=1;tr|Q59FI9|Q59FI9_HUMAN Ribosomal protein L12 variant (Fragment) OS=Homo sapiens OX=9606 PE=2 SV=1;tr|D3DS95|D3DS95_HUMAN HCG21173, isoform CRA_a OS=Homo sapiens OX=96	917610000	885000000	821090000	753770000	1073100000	987770000	1050800000	1044600000
sp|P30084|ECHM_HUMAN;tr|A0A2P9ACN2|A0A2P9ACN2_HUMAN	sp|P30084|ECHM_HUMAN	sp|P30084|ECHM_HUMAN Enoyl-CoA hydratase, mitochondrial OS=Homo sapiens OX=9606 GN=ECHS1 PE=1 SV=4	116770000	123320000	114660000	97680000	138930000	144470000	116420000	113660000
sp|P30085|KCY_HUMAN;tr|B2R6S5|B2R6S5_HUMAN;tr|B4DDL4|B4DDL4_HUMAN;tr|Q5T0D2|Q5T0D2_HUMAN;tr|B4DFW6|B4DFW6_HUMAN	sp|P30085|KCY_HUMAN;tr|B2R6S5|B2R6S5_HUMAN;tr|B4DDL4|B4DDL4_HUMAN;tr|Q5T0D2|Q5T0D2_HUMAN;tr|B4DFW6|B4DFW6_HUMAN	sp|P30085|KCY_HUMAN UMP-CMP kinase OS=Homo sapiens OX=9606 GN=CMPK1 PE=1 SV=3;tr|B2R6S5|B2R6S5_HUMAN UMP-CMP kinase OS=Homo sapiens OX=9606 GN=CMPK PE=2 SV=1;tr|B4DDL4|B4DDL4_HUMAN cDNA FLJ53966, moderately similar to Homo sapiens cytidylate kinase (CMPK),	115870000	115600000	100020000	126250000	108110000	116290000	108450000	106860000
sp|P30154|2AAB_HUMAN;tr|A8K8B0|A8K8B0_HUMAN;tr|B7Z1G3|B7Z1G3_HUMAN;tr|H0YDG7|H0YDG7_HUMAN;tr|E9PPI5|E9PPI5_HUMAN;tr|E9PHZ6|E9PHZ6_HUMAN	sp|P30154|2AAB_HUMAN;tr|A8K8B0|A8K8B0_HUMAN;tr|B7Z1G3|B7Z1G3_HUMAN	sp|P30154|2AAB_HUMAN Serine/threonine-protein phosphatase 2A 65 kDa regulatory subunit A beta isoform OS=Homo sapiens OX=9606 GN=PPP2R1B PE=1 SV=3;tr|A8K8B0|A8K8B0_HUMAN cDNA FLJ76434, highly similar to Homo sapiens protein phosphatase 2 (formerly 2A), reg	34250000	30516000	26863000	41451000	39330000	45738000	39812000	36569000
sp|P30837|AL1B1_HUMAN;tr|B4DLJ0|B4DLJ0_HUMAN	sp|P30837|AL1B1_HUMAN	sp|P30837|AL1B1_HUMAN Aldehyde dehydrogenase X, mitochondrial OS=Homo sapiens OX=9606 GN=ALDH1B1 PE=1 SV=3	19526000	18092000	15729000	24058000	18843000	16185000	18803000	16577000
sp|P31689|DNJA1_HUMAN;tr|B7Z5C0|B7Z5C0_HUMAN;tr|Q9NXZ8|Q9NXZ8_HUMAN	sp|P31689|DNJA1_HUMAN;tr|B7Z5C0|B7Z5C0_HUMAN;tr|Q9NXZ8|Q9NXZ8_HUMAN	sp|P31689|DNJA1_HUMAN DnaJ homolog subfamily A member 1 OS=Homo sapiens OX=9606 GN=DNAJA1 PE=1 SV=2;tr|B7Z5C0|B7Z5C0_HUMAN cDNA FLJ52352, highly similar to DnaJ homolog subfamily A member 1 OS=Homo sapiens OX=9606 PE=2 SV=1;tr|Q9NXZ8|Q9NXZ8_HUMAN HDJ2 prot	125670000	123390000	127240000	124090000	138590000	133370000	138520000	126670000
sp|P31930|QCR1_HUMAN;tr|B4DUL5|B4DUL5_HUMAN;tr|B4DZB9|B4DZB9_HUMAN	sp|P31930|QCR1_HUMAN;tr|B4DUL5|B4DUL5_HUMAN	sp|P31930|QCR1_HUMAN Cytochrome b-c1 complex subunit 1, mitochondrial OS=Homo sapiens OX=9606 GN=UQCRC1 PE=1 SV=3;tr|B4DUL5|B4DUL5_HUMAN cDNA FLJ51625, highly similar to Ubiquinol-cytochrome-c reductase complex coreprotein I, mitochondrial (EC 1.10.2.2) OS	212170000	199150000	197110000	172370000	208720000	215560000	207800000	209150000
sp|P31947|1433S_HUMAN	sp|P31947|1433S_HUMAN	sp|P31947|1433S_HUMAN 14-3-3 protein sigma OS=Homo sapiens OX=9606 GN=SFN PE=1 SV=1	1038900000	962200000	906260000	846910000	859000000	807410000	706230000	822570000
sp|P34932|HSP74_HUMAN;tr|B4DH02|B4DH02_HUMAN;tr|V9HW33|V9HW33_HUMAN;tr|B4DUS3|B4DUS3_HUMAN;tr|Q59GF8|Q59GF8_HUMAN;tr|B4DIZ3|B4DIZ3_HUMAN;tr|B4DT47|B4DT47_HUMAN;tr|B4E354|B4E354_HUMAN;tr|A0A087WYC1|A0A087WYC1_HUMAN;tr|B4E0H6|B4E0H6_HUMAN;tr|O14992|O14992_HUMAN;tr|A0A087WTS8|A0A087WTS8_HUMAN;tr|B4DSE8|B4DSE8_HUMAN;tr|B0AZU6|B0AZU6_HUMAN;tr|B0AZS1|B0AZS1_HUMAN;tr|Q7KYN0|Q7KYN0_HUMAN;tr|B0AZT0|B0AZT0…	sp|P34932|HSP74_HUMAN;tr|B4DH02|B4DH02_HUMAN;tr|V9HW33|V9HW33_HUMAN;tr|B4DUS3|B4DUS3_HUMAN;tr|Q59GF8|Q59GF8_HUMAN;tr|B4DIZ3|B4DIZ3_HUMAN;tr|B4DT47|B4DT47_HUMAN;tr|B4E354|B4E354_HUMAN;tr|A0A087WYC1|A0A087WYC1_HUMAN;tr|B4E0H6|B4E0H6_HUMAN	sp|P34932|HSP74_HUMAN Heat shock 70 kDa protein 4 OS=Homo sapiens OX=9606 GN=HSPA4 PE=1 SV=4;tr|B4DH02|B4DH02_HUMAN cDNA FLJ50510, highly similar to Heat shock 70 kDa protein 4 OS=Homo sapiens OX=9606 PE=2 SV=1;tr|V9HW33|V9HW33_HUMAN Epididymis secretory s	1173200000	1083100000	1115700000	1138000000	1294200000	1295500000	1247800000	1277300000
sp|P35249|RFC4_HUMAN;tr|C9JZI1|C9JZI1_HUMAN;tr|H7C1P0|H7C1P0_HUMAN;tr|C9J8M3|C9J8M3_HUMAN;tr|C9JTT7|C9JTT7_HUMAN;tr|C9JGY5|C9JGY5_HUMAN;tr|F8WE44|F8WE44_HUMAN;tr|C9JXZ7|C9JXZ7_HUMAN	sp|P35249|RFC4_HUMAN;tr|C9JZI1|C9JZI1_HUMAN	sp|P35249|RFC4_HUMAN Replication factor C subunit 4 OS=Homo sapiens OX=9606 GN=RFC4 PE=1 SV=2;tr|C9JZI1|C9JZI1_HUMAN Replication factor C subunit 4 OS=Homo sapiens OX=9606 GN=RFC4 PE=1 SV=1	42353000	36033000	38144000	36837000	32518000	46699000	48245000	41159000
sp|P35270|SPRE_HUMAN;tr|Q93041|Q93041_HUMAN;tr|Q9UEC5|Q9UEC5_HUMAN;tr|B4DSF0|B4DSF0_HUMAN;REV__tr|D9IVD5|D9IVD5_HUMAN;REV__tr|A0A024R241|A0A024R241_HUMAN;REV__sp|Q16649|NFIL3_HUMAN	sp|P35270|SPRE_HUMAN	sp|P35270|SPRE_HUMAN Sepiapterin reductase OS=Homo sapiens OX=9606 GN=SPR PE=1 SV=1	30573000	33261000	23841000	30589000	39691000	35422000	34579000	35210000
sp|P35527|K1C9_HUMAN;CON__P35527;tr|K7EQQ3|K7EQQ3_HUMAN	sp|P35527|K1C9_HUMAN;CON__P35527;tr|K7EQQ3|K7EQQ3_HUMAN	sp|P35527|K1C9_HUMAN Keratin, type I cytoskeletal 9 OS=Homo sapiens OX=9606 GN=KRT9 PE=1 SV=3;;tr|K7EQQ3|K7EQQ3_HUMAN Keratin, type I cytoskeletal 9 OS=Homo sapiens OX=9606 GN=KRT9 PE=1 SV=1	183750000	325230000	264370000	308660000	88821000	70554000	84716000	170140000
sp|P35580|MYH10_HUMAN;tr|E7ERA5|E7ERA5_HUMAN;tr|G1UI33|G1UI33_HUMAN;tr|Q9UE82|Q9UE82_HUMAN;tr|Q9UMG3|Q9UMG3_HUMAN;tr|A5XEH4|A5XEH4_HUMAN	sp|P35580|MYH10_HUMAN	sp|P35580|MYH10_HUMAN Myosin-10 OS=Homo sapiens OX=9606 GN=MYH10 PE=1 SV=3	220070000	230430000	229020000	234060000	229750000	220810000	233160000	224000000
sp|P35606|COPB2_HUMAN;tr|B4E2C9|B4E2C9_HUMAN;tr|D6RBT6|D6RBT6_HUMAN;tr|D6RBZ7|D6RBZ7_HUMAN;tr|D6RCL6|D6RCL6_HUMAN;tr|D6RBG7|D6RBG7_HUMAN;tr|D6R997|D6R997_HUMAN;tr|H0Y938|H0Y938_HUMAN;tr|H0YAC7|H0YAC7_HUMAN	sp|P35606|COPB2_HUMAN	sp|P35606|COPB2_HUMAN Coatomer subunit beta OS=Homo sapiens OX=9606 GN=COPB2 PE=1 SV=2	232420000	223680000	226500000	221730000	218110000	215890000	206920000	216580000
sp|P35610|SOAT1_HUMAN;tr|B1APM4|B1APM4_HUMAN;tr|B7ZAT6|B7ZAT6_HUMAN;tr|B4DFD8|B4DFD8_HUMAN	sp|P35610|SOAT1_HUMAN;tr|B1APM4|B1APM4_HUMAN;tr|B7ZAT6|B7ZAT6_HUMAN	sp|P35610|SOAT1_HUMAN Sterol O-acyltransferase 1 OS=Homo sapiens OX=9606 GN=SOAT1 PE=1 SV=3;tr|B1APM4|B1APM4_HUMAN Sterol O-acyltransferase 1 (Fragment) OS=Homo sapiens OX=9606 GN=SOAT1 PE=1 SV=1;tr|B7ZAT6|B7ZAT6_HUMAN O-acyltransferase OS=Homo sapiens OX=	71397000	72231000	70952000	69770000	85601000	75671000	94792000	93361000
sp|P35659|DEK_HUMAN;tr|B4DFG0|B4DFG0_HUMAN;tr|B4DNW3|B4DNW3_HUMAN;tr|D6RDA2|D6RDA2_HUMAN;tr|H0Y993|H0Y993_HUMAN;tr|Q6MZJ9|Q6MZJ9_HUMAN;tr|D6R9L5|D6R9L5_HUMAN;tr|H0Y8X0|H0Y8X0_HUMAN	sp|P35659|DEK_HUMAN;tr|B4DFG0|B4DFG0_HUMAN;tr|B4DNW3|B4DNW3_HUMAN;tr|D6RDA2|D6RDA2_HUMAN	sp|P35659|DEK_HUMAN Protein DEK OS=Homo sapiens OX=9606 GN=DEK PE=1 SV=1;tr|B4DFG0|B4DFG0_HUMAN Protein DEK OS=Homo sapiens OX=9606 GN=DEK PE=1 SV=1;tr|B4DNW3|B4DNW3_HUMAN cDNA FLJ51914, highly similar to Protein DEK OS=Homo sapiens OX=9606 PE=2 SV=1;tr|D6	257340000	258360000	257190000	297090000	296030000	302590000	291970000	337020000
sp|P35908|K22E_HUMAN;CON__P35908v2;CON__P35908	sp|P35908|K22E_HUMAN;CON__P35908v2;CON__P35908	sp|P35908|K22E_HUMAN Keratin, type II cytoskeletal 2 epidermal OS=Homo sapiens OX=9606 GN=KRT2 PE=1 SV=2;;	182500000	276910000	267470000	285430000	152680000	157040000	57622000	193440000
sp|P36507|MP2K2_HUMAN;tr|B3KS97|B3KS97_HUMAN;tr|G5E9C7|G5E9C7_HUMAN;tr|Q7Z370|Q7Z370_HUMAN;tr|M0R1B6|M0R1B6_HUMAN;tr|A0A1B0GUL7|A0A1B0GUL7_HUMAN	sp|P36507|MP2K2_HUMAN;tr|B3KS97|B3KS97_HUMAN;tr|G5E9C7|G5E9C7_HUMAN;tr|Q7Z370|Q7Z370_HUMAN	sp|P36507|MP2K2_HUMAN Dual specificity mitogen-activated protein kinase kinase 2 OS=Homo sapiens OX=9606 GN=MAP2K2 PE=1 SV=1;tr|B3KS97|B3KS97_HUMAN Mitogen-activated protein kinase kinase 2, isoform CRA_d OS=Homo sapiens OX=9606 GN=MAP2K2 PE=2 SV=1;tr|G5E9	79007000	76286000	79751000	75862000	90320000	91689000	97299000	85604000
sp|P36551|HEM6_HUMAN;tr|H0YA22|H0YA22_HUMAN;tr|D6RER6|D6RER6_HUMAN	sp|P36551|HEM6_HUMAN	sp|P36551|HEM6_HUMAN Oxygen-dependent coproporphyrinogen-III oxidase, mitochondrial OS=Homo sapiens OX=9606 GN=CPOX PE=1 SV=3	88302000	75348000	73245000	82026000	84133000	92799000	92857000	84207000
sp|P36578|RL4_HUMAN;tr|Q59GY2|Q59GY2_HUMAN;tr|B4DMJ6|B4DMJ6_HUMAN;tr|Q53G74|Q53G74_HUMAN;tr|B4DFI6|B4DFI6_HUMAN;tr|H3BTP7|H3BTP7_HUMAN;tr|H3BU31|H3BU31_HUMAN;tr|H3BM89|H3BM89_HUMAN;tr|B4DP82|B4DP82_HUMAN;tr|B4DMJ2|B4DMJ2_HUMAN	sp|P36578|RL4_HUMAN;tr|Q59GY2|Q59GY2_HUMAN;tr|B4DMJ6|B4DMJ6_HUMAN;tr|Q53G74|Q53G74_HUMAN;tr|B4DFI6|B4DFI6_HUMAN;tr|H3BTP7|H3BTP7_HUMAN;tr|H3BU31|H3BU31_HUMAN;tr|H3BM89|H3BM89_HUMAN	sp|P36578|RL4_HUMAN 60S ribosomal protein L4 OS=Homo sapiens OX=9606 GN=RPL4 PE=1 SV=5;tr|Q59GY2|Q59GY2_HUMAN Ribosomal protein L4 variant (Fragment) OS=Homo sapiens OX=9606 PE=2 SV=1;tr|B4DMJ6|B4DMJ6_HUMAN cDNA FLJ50996, highly similar to 60S ribosomal pr	1065500000	1026200000	1072600000	1129200000	917430000	1146700000	1220800000	1116500000
sp|P36871|PGM1_HUMAN;tr|B4DFP1|B4DFP1_HUMAN;tr|B7Z6C2|B7Z6C2_HUMAN;tr|B4DDQ8|B4DDQ8_HUMAN;tr|Q9H1D2|Q9H1D2_HUMAN	sp|P36871|PGM1_HUMAN;tr|B4DFP1|B4DFP1_HUMAN;tr|B7Z6C2|B7Z6C2_HUMAN;tr|B4DDQ8|B4DDQ8_HUMAN	sp|P36871|PGM1_HUMAN Phosphoglucomutase-1 OS=Homo sapiens OX=9606 GN=PGM1 PE=1 SV=3;tr|B4DFP1|B4DFP1_HUMAN cDNA FLJ51818, highly similar to Phosphoglucomutase-1 (EC 5.4.2.2) OS=Homo sapiens OX=9606 PE=2 SV=1;tr|B7Z6C2|B7Z6C2_HUMAN cDNA FLJ50663, highly sim	428980000	403330000	419730000	427250000	336040000	333510000	331700000	335510000
sp|P37108|SRP14_HUMAN;tr|H0YLA2|H0YLA2_HUMAN;tr|H0YLW0|H0YLW0_HUMAN	sp|P37108|SRP14_HUMAN;tr|H0YLA2|H0YLA2_HUMAN	sp|P37108|SRP14_HUMAN Signal recognition particle 14 kDa protein OS=Homo sapiens OX=9606 GN=SRP14 PE=1 SV=2;tr|H0YLA2|H0YLA2_HUMAN Signal recognition particle 14 kDa protein OS=Homo sapiens OX=9606 GN=SRP14 PE=1 SV=1	130760000	129310000	119960000	136520000	148490000	145580000	152330000	159970000
sp|P37802|TAGL2_HUMAN;tr|X6RJP6|X6RJP6_HUMAN;tr|B7Z5A2|B7Z5A2_HUMAN;tr|C9J5W6|C9J5W6_HUMAN;sp|Q9UI15|TAGL3_HUMAN	sp|P37802|TAGL2_HUMAN;tr|X6RJP6|X6RJP6_HUMAN	sp|P37802|TAGL2_HUMAN Transgelin-2 OS=Homo sapiens OX=9606 GN=TAGLN2 PE=1 SV=3;tr|X6RJP6|X6RJP6_HUMAN Transgelin-2 (Fragment) OS=Homo sapiens OX=9606 GN=TAGLN2 PE=1 SV=1	1299000000	1270600000	1173600000	1314900000	946370000	946670000	966810000	906370000
sp|P38159|RBMX_HUMAN;tr|H3BT71|H3BT71_HUMAN;tr|H0Y6E7|H0Y6E7_HUMAN;tr|B4E352|B4E352_HUMAN;tr|B3KRG5|B3KRG5_HUMAN;tr|H3BUY5|H3BUY5_HUMAN;tr|H3BR27|H3BR27_HUMAN;tr|H3BNC1|H3BNC1_HUMAN;tr|A8K8A6|A8K8A6_HUMAN;sp|O75526|RMXL2_HUMAN;sp|Q8N7X1|RMXL3_HUMAN	sp|P38159|RBMX_HUMAN;tr|H3BT71|H3BT71_HUMAN;tr|H0Y6E7|H0Y6E7_HUMAN;tr|B4E352|B4E352_HUMAN;tr|B3KRG5|B3KRG5_HUMAN;tr|H3BUY5|H3BUY5_HUMAN	sp|P38159|RBMX_HUMAN RNA-binding motif protein, X chromosome OS=Homo sapiens OX=9606 GN=RBMX PE=1 SV=3;tr|H3BT71|H3BT71_HUMAN RNA-binding motif protein, X chromosome OS=Homo sapiens OX=9606 GN=RBMX PE=1 SV=1;tr|H0Y6E7|H0Y6E7_HUMAN RNA-binding motif protein	562610000	548490000	537210000	625090000	543230000	512810000	549490000	550560000
sp|P38606|VATA_HUMAN;tr|B7Z2V6|B7Z2V6_HUMAN;tr|C9JA17|C9JA17_HUMAN;tr|C9JVW8|C9JVW8_HUMAN	sp|P38606|VATA_HUMAN;tr|B7Z2V6|B7Z2V6_HUMAN	sp|P38606|VATA_HUMAN V-type proton ATPase catalytic subunit A OS=Homo sapiens OX=9606 GN=ATP6V1A PE=1 SV=2;tr|B7Z2V6|B7Z2V6_HUMAN cDNA FLJ53889, highly similar to Vacuolar ATP synthase catalytic subunit A, ubiquitous isoform (EC 3.6.3.14) OS=Homo sapiens O	34264000	37586000	27799000	31745000	36669000	45338000	35735000	40522000
sp|P40123|CAP2_HUMAN;tr|Q5JPJ8|Q5JPJ8_HUMAN;tr|A0A087X0J3|A0A087X0J3_HUMAN;tr|A0A087WZ15|A0A087WZ15_HUMAN;tr|B7Z385|B7Z385_HUMAN;tr|E9PDI2|E9PDI2_HUMAN;tr|B7Z4M3|B7Z4M3_HUMAN;tr|F8WEW0|F8WEW0_HUMAN;tr|F8WDB9|F8WDB9_HUMAN	sp|P40123|CAP2_HUMAN;tr|Q5JPJ8|Q5JPJ8_HUMAN;tr|A0A087X0J3|A0A087X0J3_HUMAN;tr|A0A087WZ15|A0A087WZ15_HUMAN;tr|B7Z385|B7Z385_HUMAN;tr|E9PDI2|E9PDI2_HUMAN;tr|B7Z4M3|B7Z4M3_HUMAN	sp|P40123|CAP2_HUMAN Adenylyl cyclase-associated protein 2 OS=Homo sapiens OX=9606 GN=CAP2 PE=1 SV=1;tr|Q5JPJ8|Q5JPJ8_HUMAN Adenylyl cyclase-associated protein OS=Homo sapiens OX=9606 GN=DKFZp686D0714 PE=2 SV=1;tr|A0A087X0J3|A0A087X0J3_HUMAN Adenylyl cycla	93512000	90158000	97031000	86376000	88753000	90284000	76984000	85761000
sp|P40222|TXLNA_HUMAN	sp|P40222|TXLNA_HUMAN	sp|P40222|TXLNA_HUMAN Alpha-taxilin OS=Homo sapiens OX=9606 GN=TXLNA PE=1 SV=3	57645000	53439000	55980000	51248000	41925000	51543000	51311000	52306000
sp|P40616|ARL1_HUMAN;tr|F8VYN9|F8VYN9_HUMAN;tr|B4DZG7|B4DZG7_HUMAN;tr|B4DR16|B4DR16_HUMAN;tr|F8VP99|F8VP99_HUMAN;tr|F8W1Z8|F8W1Z8_HUMAN;tr|F8VP63|F8VP63_HUMAN	sp|P40616|ARL1_HUMAN;tr|F8VYN9|F8VYN9_HUMAN;tr|B4DZG7|B4DZG7_HUMAN;tr|B4DR16|B4DR16_HUMAN	sp|P40616|ARL1_HUMAN ADP-ribosylation factor-like protein 1 OS=Homo sapiens OX=9606 GN=ARL1 PE=1 SV=1;tr|F8VYN9|F8VYN9_HUMAN ADP-ribosylation factor-like protein 1 OS=Homo sapiens OX=9606 GN=ARL1 PE=1 SV=1;tr|B4DZG7|B4DZG7_HUMAN ADP-ribosylation factor-lik	92419000	95737000	90919000	92979000	86457000	100330000	75335000	80127000
sp|P41091|IF2G_HUMAN;sp|Q2VIR3|IF2GL_HUMAN;tr|F8W810|F8W810_HUMAN;tr|H7BZU1|H7BZU1_HUMAN	sp|P41091|IF2G_HUMAN;sp|Q2VIR3|IF2GL_HUMAN;tr|F8W810|F8W810_HUMAN	sp|P41091|IF2G_HUMAN Eukaryotic translation initiation factor 2 subunit 3 OS=Homo sapiens OX=9606 GN=EIF2S3 PE=1 SV=3;sp|Q2VIR3|IF2GL_HUMAN Putative eukaryotic translation initiation factor 2 subunit 3-like protein OS=Homo sapiens OX=9606 GN=EIF2S3L PE=5 S	522250000	519670000	499590000	498710000	444050000	450380000	482110000	501620000
sp|P41227|NAA10_HUMAN;tr|F8W808|F8W808_HUMAN;tr|A8MWP7|A8MWP7_HUMAN;tr|C9JN83|C9JN83_HUMAN;tr|B7Z9N2|B7Z9N2_HUMAN;tr|Q6P4J0|Q6P4J0_HUMAN;tr|C9JW55|C9JW55_HUMAN;tr|B4DKJ7|B4DKJ7_HUMAN;sp|Q9BSU3|NAA11_HUMAN;tr|B4DFG1|B4DFG1_HUMAN;tr|H0Y8T0|H0Y8T0_HUMAN	sp|P41227|NAA10_HUMAN	sp|P41227|NAA10_HUMAN N-alpha-acetyltransferase 10 OS=Homo sapiens OX=9606 GN=NAA10 PE=1 SV=1	113360000	107630000	100450000	106980000	108910000	109400000	98873000	108090000
sp|P41252|SYIC_HUMAN;tr|Q59G75|Q59G75_HUMAN;tr|J3KR24|J3KR24_HUMAN;tr|Q7Z3U5|Q7Z3U5_HUMAN;tr|A0A0A0MSX9|A0A0A0MSX9_HUMAN;tr|Q7Z355|Q7Z355_HUMAN;tr|Q6P0M4|Q6P0M4_HUMAN;tr|B4DVX2|B4DVX2_HUMAN;tr|Q7L4K8|Q7L4K8_HUMAN;tr|Q5TCD1|Q5TCD1_HUMAN;tr|Q9P1N9|Q9P1N9_HUMAN;tr|Q5ISS8|Q5ISS8_MACFA;tr|Q5TCC6|Q5TCC6_HUMAN;tr|Q5TCC9|Q5TCC9_HUMAN	sp|P41252|SYIC_HUMAN;tr|Q59G75|Q59G75_HUMAN;tr|J3KR24|J3KR24_HUMAN;tr|Q7Z3U5|Q7Z3U5_HUMAN;tr|A0A0A0MSX9|A0A0A0MSX9_HUMAN;tr|Q7Z355|Q7Z355_HUMAN;tr|Q6P0M4|Q6P0M4_HUMAN;tr|B4DVX2|B4DVX2_HUMAN	sp|P41252|SYIC_HUMAN Isoleucine--tRNA ligase, cytoplasmic OS=Homo sapiens OX=9606 GN=IARS PE=1 SV=2;tr|Q59G75|Q59G75_HUMAN Isoleucyl-tRNA synthetase, cytoplasmic variant (Fragment) OS=Homo sapiens OX=9606 PE=2 SV=1;tr|J3KR24|J3KR24_HUMAN Isoleucine--tRNA l	414250000	419600000	426790000	422580000	373560000	391820000	385330000	388960000
sp|P42166|LAP2A_HUMAN	sp|P42166|LAP2A_HUMAN	sp|P42166|LAP2A_HUMAN Lamina-associated polypeptide 2, isoform alpha OS=Homo sapiens OX=9606 GN=TMPO PE=1 SV=2	936630000	911960000	896600000	943540000	860680000	854860000	854490000	891220000
sp|P42224|STAT1_HUMAN;tr|J3KPM9|J3KPM9_HUMAN;tr|E7EPD2|E7EPD2_HUMAN;tr|D2KFR9|D2KFR9_HUMAN;tr|E7ENM1|E7ENM1_HUMAN;tr|H7BZB5|H7BZB5_HUMAN;tr|E9PH66|E9PH66_HUMAN;tr|H7BZ88|H7BZ88_HUMAN;tr|Q67C41|Q67C41_HUMAN;tr|A5D905|A5D905_HUMAN	sp|P42224|STAT1_HUMAN;tr|J3KPM9|J3KPM9_HUMAN	sp|P42224|STAT1_HUMAN Signal transducer and activator of transcription 1-alpha/beta OS=Homo sapiens OX=9606 GN=STAT1 PE=1 SV=2;tr|J3KPM9|J3KPM9_HUMAN Signal transducer and activator of transcription OS=Homo sapiens OX=9606 GN=STAT1 PE=1 SV=1	83876000	96306000	67202000	79784000	92018000	90429000	99526000	95072000
sp|P42574|CASP3_HUMAN;sp|Q5IS54|CASP3_PANTR;sp|Q5IS99|CASP3_SAIBB;tr|C9JXR7|C9JXR7_HUMAN;tr|A8MVM1|A8MVM1_HUMAN;tr|Q5ISR2|Q5ISR2_MACFA;tr|Q5HYI3|Q5HYI3_HUMAN	sp|P42574|CASP3_HUMAN;sp|Q5IS54|CASP3_PANTR;sp|Q5IS99|CASP3_SAIBB;tr|C9JXR7|C9JXR7_HUMAN;tr|A8MVM1|A8MVM1_HUMAN;tr|Q5ISR2|Q5ISR2_MACFA	sp|P42574|CASP3_HUMAN Caspase-3 OS=Homo sapiens OX=9606 GN=CASP3 PE=1 SV=2;sp|Q5IS54|CASP3_PANTR Caspase-3 OS=Pan troglodytes OX=9598 GN=CASP3 PE=2 SV=1;sp|Q5IS99|CASP3_SAIBB Caspase-3 OS=Saimiri boliviensis boliviensis OX=39432 GN=CASP3 PE=2 SV=1;tr|C9JXR	30688000	26227000	31497000	27298000	37122000	31349000	33902000	35460000
sp|P42677|RS27_HUMAN;tr|Q5T4L4|Q5T4L4_HUMAN;tr|A4D1G5|A4D1G5_HUMAN;tr|C9J1C5|C9J1C5_HUMAN	sp|P42677|RS27_HUMAN;tr|Q5T4L4|Q5T4L4_HUMAN	sp|P42677|RS27_HUMAN 40S ribosomal protein S27 OS=Homo sapiens OX=9606 GN=RPS27 PE=1 SV=3;tr|Q5T4L4|Q5T4L4_HUMAN 40S ribosomal protein S27 OS=Homo sapiens OX=9606 GN=RPS27 PE=1 SV=1	237630000	245450000	269780000	310850000	253010000	263380000	267920000	256680000
sp|P43034|LIS1_HUMAN;tr|Q5IS88|Q5IS88_9PRIM;sp|Q5IS43|LIS1_PANTR;tr|B4DZN3|B4DZN3_HUMAN;tr|B4DF38|B4DF38_HUMAN;tr|I3L3N5|I3L3N5_HUMAN;tr|I3L495|I3L495_HUMAN	sp|P43034|LIS1_HUMAN;tr|Q5IS88|Q5IS88_9PRIM;sp|Q5IS43|LIS1_PANTR;tr|B4DZN3|B4DZN3_HUMAN	sp|P43034|LIS1_HUMAN Platelet-activating factor acetylhydrolase IB subunit alpha OS=Homo sapiens OX=9606 GN=PAFAH1B1 PE=1 SV=2;tr|Q5IS88|Q5IS88_9PRIM Platelet-activating factor acetylhydrolase IB subunit alpha OS=Saimiri boliviensis OX=27679 GN=PAFAH1B1 PE	185780000	164390000	174400000	155020000	198000000	188600000	167520000	187300000
sp|P43246|MSH2_HUMAN;tr|Q53FK0|Q53FK0_HUMAN;tr|E9PHA6|E9PHA6_HUMAN;tr|V9H019|V9H019_HUMAN;tr|Q53GS1|Q53GS1_HUMAN;tr|Q53RU4|Q53RU4_HUMAN;tr|B4DL39|B4DL39_HUMAN;tr|B4DN49|B4DN49_HUMAN;tr|B4DSB9|B4DSB9_HUMAN;tr|V9H068|V9H068_HUMAN;tr|V9H0D5|V9H0D5_HUMAN;tr|V9H023|V9H023_HUMAN;tr|V9H0B2|V9H0B2_HUMAN;tr|V9H015|V9H015_HUMAN;tr|Q0ZAJ1|Q0ZAJ1_HUMAN;tr|V9H062|V9H062_HUMAN;tr|C9J809|C9J809_HUMAN;tr|Q0ZAJ2|…	sp|P43246|MSH2_HUMAN;tr|Q53FK0|Q53FK0_HUMAN;tr|E9PHA6|E9PHA6_HUMAN;tr|V9H019|V9H019_HUMAN;tr|Q53GS1|Q53GS1_HUMAN;tr|Q53RU4|Q53RU4_HUMAN;tr|B4DL39|B4DL39_HUMAN;tr|B4DN49|B4DN49_HUMAN;tr|B4DSB9|B4DSB9_HUMAN;tr|V9H068|V9H068_HUMAN;tr|V9H0D5|V9H0D5_HUMAN;tr|V9H023|V9H023_HUMAN	sp|P43246|MSH2_HUMAN DNA mismatch repair protein Msh2 OS=Homo sapiens OX=9606 GN=MSH2 PE=1 SV=1;tr|Q53FK0|Q53FK0_HUMAN DNA mismatch repair protein (Fragment) OS=Homo sapiens OX=9606 PE=2 SV=1;tr|E9PHA6|E9PHA6_HUMAN DNA mismatch repair protein OS=Homo sapie	47802000	38722000	46244000	41541000	58868000	53441000	60435000	58775000
sp|P43307|SSRA_HUMAN;tr|C9J3L8|C9J3L8_HUMAN;tr|C9J5W0|C9J5W0_HUMAN;tr|B2R6N9|B2R6N9_HUMAN;tr|E9PAL7|E9PAL7_HUMAN;tr|C9IZQ1|C9IZQ1_HUMAN;tr|C9JBX5|C9JBX5_HUMAN;tr|C9JY01|C9JY01_HUMAN	sp|P43307|SSRA_HUMAN;tr|C9J3L8|C9J3L8_HUMAN;tr|C9J5W0|C9J5W0_HUMAN;tr|B2R6N9|B2R6N9_HUMAN;tr|E9PAL7|E9PAL7_HUMAN;tr|C9IZQ1|C9IZQ1_HUMAN	sp|P43307|SSRA_HUMAN Translocon-associated protein subunit alpha OS=Homo sapiens OX=9606 GN=SSR1 PE=1 SV=3;tr|C9J3L8|C9J3L8_HUMAN Translocon-associated protein subunit alpha OS=Homo sapiens OX=9606 GN=SSR1 PE=1 SV=1;tr|C9J5W0|C9J5W0_HUMAN Translocon-associ	179130000	150370000	161440000	150780000	129000000	144790000	146140000	146820000
sp|P46013|KI67_HUMAN;tr|Q70L73|Q70L73_HUMAN;tr|Q70L74|Q70L74_HUMAN;tr|B4DRH3|B4DRH3_HUMAN	sp|P46013|KI67_HUMAN	sp|P46013|KI67_HUMAN Proliferation marker protein Ki-67 OS=Homo sapiens OX=9606 GN=MKI67 PE=1 SV=2	99029000	128000000	171690000	186540000	105660000	94952000	193980000	203450000
sp|P46087|NOP2_HUMAN;tr|F5H359|F5H359_HUMAN;tr|F5H8G6|F5H8G6_HUMAN;tr|F5GWB7|F5GWB7_HUMAN;tr|F5H709|F5H709_HUMAN;tr|F5H5X6|F5H5X6_HUMAN;tr|F5GYR3|F5GYR3_HUMAN	sp|P46087|NOP2_HUMAN	sp|P46087|NOP2_HUMAN Probable 28S rRNA (cytosine(4447)-C(5))-methyltransferase OS=Homo sapiens OX=9606 GN=NOP2 PE=1 SV=2	13284000	13583000	19491000	18884000	11930000	11214000	16879000	18666000
sp|P46109|CRKL_HUMAN	sp|P46109|CRKL_HUMAN	sp|P46109|CRKL_HUMAN Crk-like protein OS=Homo sapiens OX=9606 GN=CRKL PE=1 SV=1	55994000	57393000	40750000	55689000	59519000	56030000	57803000	50060000
sp|P46783|RS10_HUMAN;tr|F6U211|F6U211_HUMAN;tr|Q59GE4|Q59GE4_HUMAN;sp|Q9NQ39|RS10L_HUMAN	sp|P46783|RS10_HUMAN;tr|F6U211|F6U211_HUMAN;tr|Q59GE4|Q59GE4_HUMAN	sp|P46783|RS10_HUMAN 40S ribosomal protein S10 OS=Homo sapiens OX=9606 GN=RPS10 PE=1 SV=1;tr|F6U211|F6U211_HUMAN 40S ribosomal protein S10 OS=Homo sapiens OX=9606 GN=RPS10 PE=4 SV=1;tr|Q59GE4|Q59GE4_HUMAN Ribosomal protein S10 variant (Fragment) OS=Homo sa	179870000	156840000	167540000	161540000	191400000	184180000	214010000	181460000
sp|P46937|YAP1_HUMAN;tr|A0A024R3E4|A0A024R3E4_HUMAN;tr|Q86T74|Q86T74_HUMAN;tr|H0YCI3|H0YCI3_HUMAN;tr|B4E2Y3|B4E2Y3_HUMAN;tr|K0KVU2|K0KVU2_HUMAN	sp|P46937|YAP1_HUMAN;tr|A0A024R3E4|A0A024R3E4_HUMAN;tr|Q86T74|Q86T74_HUMAN;tr|H0YCI3|H0YCI3_HUMAN;tr|B4E2Y3|B4E2Y3_HUMAN	sp|P46937|YAP1_HUMAN Transcriptional coactivator YAP1 OS=Homo sapiens OX=9606 GN=YAP1 PE=1 SV=2;tr|A0A024R3E4|A0A024R3E4_HUMAN Yes-associated protein 1, 65kDa, isoform CRA_b OS=Homo sapiens OX=9606 GN=YAP1 PE=4 SV=1;tr|Q86T74|Q86T74_HUMAN Uncharacterized p	98742000	93171000	100420000	112030000	107970000	108310000	93204000	108040000
sp|P47985|UCRI_HUMAN;sp|P0C7P4|UCRIL_HUMAN	sp|P47985|UCRI_HUMAN;sp|P0C7P4|UCRIL_HUMAN	sp|P47985|UCRI_HUMAN Cytochrome b-c1 complex subunit Rieske, mitochondrial OS=Homo sapiens OX=9606 GN=UQCRFS1 PE=1 SV=2;sp|P0C7P4|UCRIL_HUMAN Putative cytochrome b-c1 complex subunit Rieske-like protein 1 OS=Homo sapiens OX=9606 GN=UQCRFS1P1 PE=5 SV=1	83162000	85876000	79187000	74689000	78710000	91164000	80777000	93953000
sp|P48047|ATPO_HUMAN;tr|Q53HH2|Q53HH2_HUMAN;tr|H7C0C1|H7C0C1_HUMAN;tr|H7C068|H7C068_HUMAN;tr|H7C086|H7C086_HUMAN	sp|P48047|ATPO_HUMAN;tr|Q53HH2|Q53HH2_HUMAN;tr|H7C0C1|H7C0C1_HUMAN	sp|P48047|ATPO_HUMAN ATP synthase subunit O, mitochondrial OS=Homo sapiens OX=9606 GN=ATP5O PE=1 SV=1;tr|Q53HH2|Q53HH2_HUMAN Mitochondrial ATP synthase, O subunit variant (Fragment) OS=Homo sapiens OX=9606 PE=2 SV=1;tr|H7C0C1|H7C0C1_HUMAN Uncharacterized p	147530000	146250000	131660000	130260000	190170000	185330000	184750000	157020000
sp|P48147|PPCE_HUMAN;tr|Q9UM02|Q9UM02_HUMAN;tr|B2RAH7|B2RAH7_HUMAN	sp|P48147|PPCE_HUMAN;tr|Q9UM02|Q9UM02_HUMAN;tr|B2RAH7|B2RAH7_HUMAN	sp|P48147|PPCE_HUMAN Prolyl endopeptidase OS=Homo sapiens OX=9606 GN=PREP PE=1 SV=2;tr|Q9UM02|Q9UM02_HUMAN Prolyl endopeptidase OS=Homo sapiens OX=9606 PE=2 SV=1;tr|B2RAH7|B2RAH7_HUMAN cDNA, FLJ94921, highly similar to Homo sapiens prolyl endopeptidase (PR	76658000	84140000	75466000	82927000	90482000	84221000	79853000	85486000
sp|P48960|CD97_HUMAN;tr|B4DTS6|B4DTS6_HUMAN;tr|B3KUI0|B3KUI0_HUMAN;tr|B4E336|B4E336_HUMAN;tr|A8K6W1|A8K6W1_HUMAN;tr|A0JNV7|A0JNV7_HUMAN;tr|B4DWB8|B4DWB8_HUMAN;tr|Q53GP0|Q53GP0_HUMAN;sp|Q9UHX3|AGRE2_HUMAN;tr|M0R0K5|M0R0K5_HUMAN;tr|K7EKV5|K7EKV5_HUMAN;tr|K7EPE8|K7EPE8_HUMAN;tr|K7EPP8|K7EPP8_HUMAN;tr|Q7Z618|Q7Z618_HUMAN;tr|M0QY55|M0QY55_HUMAN;tr|B4DQ88|B4DQ88_HUMAN	sp|P48960|CD97_HUMAN;tr|B4DTS6|B4DTS6_HUMAN;tr|B3KUI0|B3KUI0_HUMAN;tr|B4E336|B4E336_HUMAN	sp|P48960|CD97_HUMAN CD97 antigen OS=Homo sapiens OX=9606 GN=CD97 PE=1 SV=4;tr|B4DTS6|B4DTS6_HUMAN cDNA FLJ54117, highly similar to CD97 antigen OS=Homo sapiens OX=9606 PE=2 SV=1;tr|B3KUI0|B3KUI0_HUMAN cDNA FLJ39945 fis, clone SPLEN2023977, highly similar	260280000	251120000	272400000	270530000	205670000	212810000	217920000	225180000
sp|P49006|MRP_HUMAN	sp|P49006|MRP_HUMAN	sp|P49006|MRP_HUMAN MARCKS-related protein OS=Homo sapiens OX=9606 GN=MARCKSL1 PE=1 SV=2	169060000	164090000	190580000	158310000	138310000	131710000	131620000	132230000
sp|P49189|AL9A1_HUMAN;tr|B4DE91|B4DE91_HUMAN;tr|B9EKV4|B9EKV4_HUMAN;tr|B4DX14|B4DX14_HUMAN;tr|B4DYY1|B4DYY1_HUMAN	sp|P49189|AL9A1_HUMAN;tr|B4DE91|B4DE91_HUMAN;tr|B9EKV4|B9EKV4_HUMAN;tr|B4DX14|B4DX14_HUMAN	sp|P49189|AL9A1_HUMAN 4-trimethylaminobutyraldehyde dehydrogenase OS=Homo sapiens OX=9606 GN=ALDH9A1 PE=1 SV=3;tr|B4DE91|B4DE91_HUMAN cDNA FLJ55534, highly similar to 4-trimethylaminobutyraldehyde dehydrogenase (EC 1.2.1.47) OS=Homo sapiens OX=9606 PE=2 SV	208700000	190730000	166910000	167210000	195680000	207180000	177140000	179170000
sp|P49321|NASP_HUMAN;tr|Q53H03|Q53H03_HUMAN;tr|B4DS57|B4DS57_HUMAN;tr|Q6PJY7|Q6PJY7_HUMAN;tr|Q5T626|Q5T626_HUMAN;tr|E9PPR5|E9PPR5_HUMAN;tr|Q5T624|Q5T624_HUMAN;tr|Q9P1N1|Q9P1N1_HUMAN;tr|O95138|O95138_HUMAN;tr|H0YDS9|H0YDS9_HUMAN;tr|E9PRH9|E9PRH9_HUMAN;tr|H0YF33|H0YF33_HUMAN;tr|E9PI86|E9PI86_HUMAN;tr|E9PNB5|E9PNB5_HUMAN;tr|E9PPQ8|E9PPQ8_HUMAN	sp|P49321|NASP_HUMAN;tr|Q53H03|Q53H03_HUMAN;tr|B4DS57|B4DS57_HUMAN;tr|Q6PJY7|Q6PJY7_HUMAN	sp|P49321|NASP_HUMAN Nuclear autoantigenic sperm protein OS=Homo sapiens OX=9606 GN=NASP PE=1 SV=2;tr|Q53H03|Q53H03_HUMAN Nuclear autoantigenic sperm protein isoform 2 variant (Fragment) OS=Homo sapiens OX=9606 PE=2 SV=1;tr|B4DS57|B4DS57_HUMAN cDNA FLJ5317	348360000	370300000	350980000	377460000	220850000	252560000	242450000	244360000
sp|P49411|EFTU_HUMAN	sp|P49411|EFTU_HUMAN	sp|P49411|EFTU_HUMAN Elongation factor Tu, mitochondrial OS=Homo sapiens OX=9606 GN=TUFM PE=1 SV=2	506140000	456940000	468370000	458070000	577950000	545190000	507000000	543810000
sp|P49419|AL7A1_HUMAN;tr|A0A1B0GW77|A0A1B0GW77_HUMAN;tr|A0A1B0GUA1|A0A1B0GUA1_HUMAN;tr|A0A1B0GTG2|A0A1B0GTG2_HUMAN;tr|A0A1B0GW82|A0A1B0GW82_HUMAN;tr|A0A1B0GTJ4|A0A1B0GTJ4_HUMAN;tr|A0A1B0GV49|A0A1B0GV49_HUMAN;tr|A0A1B0GTY9|A0A1B0GTY9_HUMAN;tr|A0A1B0GUY0|A0A1B0GUY0_HUMAN;tr|A0A0J9YWF7|A0A0J9YWF7_HUMAN;tr|H0YHM6|H0YHM6_HUMAN;tr|F8WDY6|F8WDY6_HUMAN;tr|F8VVF2|F8VVF2_HUMAN;tr|A0A1B0GVU0|A0A1B0GVU0_HUMAN	sp|P49419|AL7A1_HUMAN;tr|A0A1B0GW77|A0A1B0GW77_HUMAN;tr|A0A1B0GUA1|A0A1B0GUA1_HUMAN;tr|A0A1B0GTG2|A0A1B0GTG2_HUMAN;tr|A0A1B0GW82|A0A1B0GW82_HUMAN;tr|A0A1B0GTJ4|A0A1B0GTJ4_HUMAN;tr|A0A1B0GV49|A0A1B0GV49_HUMAN;tr|A0A1B0GTY9|A0A1B0GTY9_HUMAN	sp|P49419|AL7A1_HUMAN Alpha-aminoadipic semialdehyde dehydrogenase OS=Homo sapiens OX=9606 GN=ALDH7A1 PE=1 SV=5;tr|A0A1B0GW77|A0A1B0GW77_HUMAN Alpha-aminoadipic semialdehyde dehydrogenase OS=Homo sapiens OX=9606 GN=ALDH7A1 PE=1 SV=1;tr|A0A1B0GUA1|A0A1B0GUA	252370000	270340000	281870000	266860000	238100000	261020000	233720000	224330000
sp|P49588|SYAC_HUMAN;tr|H3BPK7|H3BPK7_HUMAN	sp|P49588|SYAC_HUMAN	sp|P49588|SYAC_HUMAN Alanine--tRNA ligase, cytoplasmic OS=Homo sapiens OX=9606 GN=AARS PE=1 SV=2	370470000	361100000	359300000	377940000	304450000	295870000	284380000	302470000
sp|P49591|SYSC_HUMAN;tr|Q5T5C7|Q5T5C7_HUMAN;tr|Q0VGA5|Q0VGA5_HUMAN;tr|Q53HA4|Q53HA4_HUMAN	sp|P49591|SYSC_HUMAN;tr|Q5T5C7|Q5T5C7_HUMAN;tr|Q0VGA5|Q0VGA5_HUMAN;tr|Q53HA4|Q53HA4_HUMAN	sp|P49591|SYSC_HUMAN Serine--tRNA ligase, cytoplasmic OS=Homo sapiens OX=9606 GN=SARS PE=1 SV=3;tr|Q5T5C7|Q5T5C7_HUMAN Serine--tRNA ligase, cytoplasmic OS=Homo sapiens OX=9606 GN=SARS PE=1 SV=1;tr|Q0VGA5|Q0VGA5_HUMAN SARS protein OS=Homo sapiens OX=9606 GN	357660000	376820000	370050000	379960000	474660000	486600000	452480000	459330000
sp|P49593|PPM1F_HUMAN;tr|A0M8Q2|A0M8Q2_HUMAN;tr|Q6IPC0|Q6IPC0_HUMAN;tr|B5MCT7|B5MCT7_HUMAN;tr|B3KX06|B3KX06_HUMAN;tr|A8MX49|A8MX49_HUMAN;tr|Q0VGL7|Q0VGL7_HUMAN	sp|P49593|PPM1F_HUMAN;tr|A0M8Q2|A0M8Q2_HUMAN;tr|Q6IPC0|Q6IPC0_HUMAN;tr|B5MCT7|B5MCT7_HUMAN;tr|B3KX06|B3KX06_HUMAN;tr|A8MX49|A8MX49_HUMAN	sp|P49593|PPM1F_HUMAN Protein phosphatase 1F OS=Homo sapiens OX=9606 GN=PPM1F PE=1 SV=3;tr|A0M8Q2|A0M8Q2_HUMAN Phosphatase 2C motif OS=Homo sapiens OX=9606 PE=3 SV=1;tr|Q6IPC0|Q6IPC0_HUMAN Protein phosphatase 1F (PP2C domain containing) OS=Homo sapiens OX=	45781000	51552000	58599000	62816000	54761000	54358000	66441000	59486000
sp|P49720|PSB3_HUMAN;tr|A0A087WUL2|A0A087WUL2_HUMAN;tr|A0A087WXQ8|A0A087WXQ8_HUMAN;tr|A0A087WY10|A0A087WY10_HUMAN	sp|P49720|PSB3_HUMAN;tr|A0A087WUL2|A0A087WUL2_HUMAN;tr|A0A087WXQ8|A0A087WXQ8_HUMAN;tr|A0A087WY10|A0A087WY10_HUMAN	sp|P49720|PSB3_HUMAN Proteasome subunit beta type-3 OS=Homo sapiens OX=9606 GN=PSMB3 PE=1 SV=2;tr|A0A087WUL2|A0A087WUL2_HUMAN Proteasome subunit beta type-3 (Fragment) OS=Homo sapiens OX=9606 GN=PSMB3 PE=1 SV=1;tr|A0A087WXQ8|A0A087WXQ8_HUMAN Proteasome sub	177030000	168230000	138710000	166330000	156490000	184190000	190340000	174510000
sp|P49736|MCM2_HUMAN;tr|B3KXZ4|B3KXZ4_HUMAN;tr|B4DSV5|B4DSV5_HUMAN;tr|H0Y8E6|H0Y8E6_HUMAN;tr|B7Z8Z6|B7Z8Z6_HUMAN;tr|Q9BWF4|Q9BWF4_HUMAN;tr|H7C4N9|H7C4N9_HUMAN;tr|C9J013|C9J013_HUMAN;tr|C9JZ21|C9JZ21_HUMAN;tr|F8WDM3|F8WDM3_HUMAN	sp|P49736|MCM2_HUMAN;tr|B3KXZ4|B3KXZ4_HUMAN;tr|B4DSV5|B4DSV5_HUMAN;tr|H0Y8E6|H0Y8E6_HUMAN;tr|B7Z8Z6|B7Z8Z6_HUMAN;tr|Q9BWF4|Q9BWF4_HUMAN	sp|P49736|MCM2_HUMAN DNA replication licensing factor MCM2 OS=Homo sapiens OX=9606 GN=MCM2 PE=1 SV=4;tr|B3KXZ4|B3KXZ4_HUMAN DNA helicase OS=Homo sapiens OX=9606 PE=2 SV=1;tr|B4DSV5|B4DSV5_HUMAN DNA helicase OS=Homo sapiens OX=9606 PE=2 SV=1;tr|H0Y8E6|H0Y8E	71988000	67995000	78182000	74439000	114380000	109130000	110650000	113140000
sp|P49756|RBM25_HUMAN;tr|E9PQU5|E9PQU5_HUMAN;tr|H0YE46|H0YE46_HUMAN;tr|E9PSE8|E9PSE8_HUMAN	sp|P49756|RBM25_HUMAN	sp|P49756|RBM25_HUMAN RNA-binding protein 25 OS=Homo sapiens OX=9606 GN=RBM25 PE=1 SV=3	94307000	102740000	100300000	89625000	116220000	112690000	107730000	127840000
sp|P49773|HINT1_HUMAN;tr|D6REP8|D6REP8_HUMAN;tr|D6RE99|D6RE99_HUMAN;tr|D6RD60|D6RD60_HUMAN;tr|D6RC06|D6RC06_HUMAN;tr|A4D2H4|A4D2H4_HUMAN	sp|P49773|HINT1_HUMAN;tr|D6REP8|D6REP8_HUMAN;tr|D6RE99|D6RE99_HUMAN;tr|D6RD60|D6RD60_HUMAN	sp|P49773|HINT1_HUMAN Histidine triad nucleotide-binding protein 1 OS=Homo sapiens OX=9606 GN=HINT1 PE=1 SV=2;tr|D6REP8|D6REP8_HUMAN Histidine triad nucleotide-binding protein 1 OS=Homo sapiens OX=9606 GN=HINT1 PE=1 SV=1;tr|D6RE99|D6RE99_HUMAN Histidine tr	468940000	449120000	440500000	436990000	602140000	470300000	551910000	457640000
sp|P49792|RBP2_HUMAN;tr|D3DX73|D3DX73_HUMAN;sp|A6NKT7|RGPD3_HUMAN;tr|J3KNE0|J3KNE0_HUMAN;sp|Q7Z3J3|RGPD4_HUMAN;sp|O14715|RGPD8_HUMAN;tr|V9HWE4|V9HWE4_HUMAN;sp|Q99666|RGPD5_HUMAN;tr|J3KQ37|J3KQ37_HUMAN;sp|P0DJD0|RGPD1_HUMAN;tr|F8VYC4|F8VYC4_HUMAN;tr|B4DYH0|B4DYH0_HUMAN;tr|A0A286YES2|A0A286YES2_HUMAN;tr|A0A1W2PNU4|A0A1W2PNU4_HUMAN;sp|P0DJD1|RGPD2_HUMAN;tr|Q5JC46|Q5JC46_HUMAN;tr|Q5JC45|Q5JC45_HUMAN;…	sp|P49792|RBP2_HUMAN	sp|P49792|RBP2_HUMAN E3 SUMO-protein ligase RanBP2 OS=Homo sapiens OX=9606 GN=RANBP2 PE=1 SV=2	41954000	42362000	41788000	44140000	48944000	46038000	46114000	49175000
sp|P49903|SPS1_HUMAN;tr|Q5T5U6|Q5T5U6_HUMAN;tr|B4DLS1|B4DLS1_HUMAN;tr|Q5T5U7|Q5T5U7_HUMAN	sp|P49903|SPS1_HUMAN;tr|Q5T5U6|Q5T5U6_HUMAN;tr|B4DLS1|B4DLS1_HUMAN	sp|P49903|SPS1_HUMAN Selenide, water dikinase 1 OS=Homo sapiens OX=9606 GN=SEPHS1 PE=1 SV=2;tr|Q5T5U6|Q5T5U6_HUMAN Selenide, water dikinase 1 (Fragment) OS=Homo sapiens OX=9606 GN=SEPHS1 PE=1 SV=1;tr|B4DLS1|B4DLS1_HUMAN cDNA FLJ57394, highly similar to Sel	31580000	37173000	33496000	47316000	43433000	35318000	44631000	36370000
sp|P50570|DYN2_HUMAN;tr|Q59G96|Q59G96_HUMAN;tr|Q8N1K8|Q8N1K8_HUMAN;tr|B3KUU8|B3KUU8_HUMAN;tr|E5RIK2|E5RIK2_HUMAN;tr|B3KPF2|B3KPF2_HUMAN;tr|E5RHK8|E5RHK8_HUMAN;sp|Q9UQ16|DYN3_HUMAN;tr|A0A1B0GU67|A0A1B0GU67_HUMAN;tr|Q6ZSZ9|Q6ZSZ9_HUMAN;tr|Q59GI5|Q59GI5_HUMAN;tr|B4DHH5|B4DHH5_HUMAN;tr|A0A0D9SFB1|A0A0D9SFB1_HUMAN;tr|B7ZAC0|B7ZAC0_HUMAN;tr|B4DK06|B4DK06_HUMAN;tr|A0A0U1RQP1|A0A0U1RQP1_HUMAN;tr|A0A0D9SF…	sp|P50570|DYN2_HUMAN;tr|Q59G96|Q59G96_HUMAN	sp|P50570|DYN2_HUMAN Dynamin-2 OS=Homo sapiens OX=9606 GN=DNM2 PE=1 SV=2;tr|Q59G96|Q59G96_HUMAN Dynamin 2 isoform 4 variant (Fragment) OS=Homo sapiens OX=9606 PE=2 SV=1	239900000	236940000	242950000	253200000	218520000	209570000	197360000	205800000
sp|P50990|TCPQ_HUMAN;tr|Q53HU0|Q53HU0_HUMAN;tr|Q7Z759|Q7Z759_HUMAN;tr|H7C4C8|H7C4C8_HUMAN;tr|H7C2U0|H7C2U0_HUMAN	sp|P50990|TCPQ_HUMAN;tr|Q53HU0|Q53HU0_HUMAN;tr|Q7Z759|Q7Z759_HUMAN;tr|H7C4C8|H7C4C8_HUMAN	sp|P50990|TCPQ_HUMAN T-complex protein 1 subunit theta OS=Homo sapiens OX=9606 GN=CCT8 PE=1 SV=4;tr|Q53HU0|Q53HU0_HUMAN Chaperonin containing TCP1, subunit 8 (Theta) variant (Fragment) OS=Homo sapiens OX=9606 PE=2 SV=1;tr|Q7Z759|Q7Z759_HUMAN CCT8 protein O	1675700000	1615600000	1602900000	1610900000	1715400000	1763300000	1711600000	1752400000
sp|P50991|TCPD_HUMAN;tr|B7Z9L0|B7Z9L0_HUMAN;tr|A8K3C3|A8K3C3_HUMAN;tr|B7Z2Z8|B7Z2Z8_HUMAN;tr|B7Z2F4|B7Z2F4_HUMAN	sp|P50991|TCPD_HUMAN;tr|B7Z9L0|B7Z9L0_HUMAN;tr|A8K3C3|A8K3C3_HUMAN;tr|B7Z2Z8|B7Z2Z8_HUMAN;tr|B7Z2F4|B7Z2F4_HUMAN	sp|P50991|TCPD_HUMAN T-complex protein 1 subunit delta OS=Homo sapiens OX=9606 GN=CCT4 PE=1 SV=4;tr|B7Z9L0|B7Z9L0_HUMAN T-complex protein 1 subunit delta OS=Homo sapiens OX=9606 PE=2 SV=1;tr|A8K3C3|A8K3C3_HUMAN T-complex protein 1 subunit delta OS=Homo sap	970560000	948720000	992490000	922830000	911790000	959390000	986760000	996730000
sp|P51116|FXR2_HUMAN;tr|I3L1Z2|I3L1Z2_HUMAN;tr|A0A087WY29|A0A087WY29_HUMAN	sp|P51116|FXR2_HUMAN	sp|P51116|FXR2_HUMAN Fragile X mental retardation syndrome-related protein 2 OS=Homo sapiens OX=9606 GN=FXR2 PE=1 SV=2	68562000	67193000	77296000	73105000	68684000	65943000	59872000	70356000
sp|P51571|SSRD_HUMAN;tr|A6NLM8|A6NLM8_HUMAN	sp|P51571|SSRD_HUMAN;tr|A6NLM8|A6NLM8_HUMAN	sp|P51571|SSRD_HUMAN Translocon-associated protein subunit delta OS=Homo sapiens OX=9606 GN=SSR4 PE=1 SV=1;tr|A6NLM8|A6NLM8_HUMAN Translocon-associated protein subunit delta OS=Homo sapiens OX=9606 GN=SSR4 PE=1 SV=1	150390000	133420000	123330000	136380000	150560000	140750000	132780000	138210000
sp|P51665|PSMD7_HUMAN;tr|B2RD27|B2RD27_HUMAN;tr|B4DXI8|B4DXI8_HUMAN;tr|H3BNT7|H3BNT7_HUMAN;tr|H3BTM8|H3BTM8_HUMAN;tr|H3BQV2|H3BQV2_HUMAN	sp|P51665|PSMD7_HUMAN;tr|B2RD27|B2RD27_HUMAN;tr|B4DXI8|B4DXI8_HUMAN;tr|H3BNT7|H3BNT7_HUMAN;tr|H3BTM8|H3BTM8_HUMAN	sp|P51665|PSMD7_HUMAN 26S proteasome non-ATPase regulatory subunit 7 OS=Homo sapiens OX=9606 GN=PSMD7 PE=1 SV=2;tr|B2RD27|B2RD27_HUMAN cDNA, FLJ96428, highly similar to Homo sapiens proteasome (prosome, macropain) 26S subunit, non-ATPase, 7 (Mov34 homolog)	137000000	134420000	150300000	144110000	163470000	149980000	157810000	142570000
sp|P51991|ROA3_HUMAN;tr|Q65ZQ3|Q65ZQ3_HUMAN;tr|B4E036|B4E036_HUMAN;tr|Q8NFG3|Q8NFG3_HUMAN;tr|H7C1J8|H7C1J8_HUMAN;tr|Q66K53|Q66K53_HUMAN	sp|P51991|ROA3_HUMAN	sp|P51991|ROA3_HUMAN Heterogeneous nuclear ribonucleoprotein A3 OS=Homo sapiens OX=9606 GN=HNRNPA3 PE=1 SV=2	768670000	738510000	732610000	807290000	719780000	756450000	789990000	821570000
sp|P52209|6PGD_HUMAN;tr|B4E2U0|B4E2U0_HUMAN;tr|B4DL86|B4DL86_HUMAN;tr|B4DV68|B4DV68_HUMAN;tr|A9Z1X1|A9Z1X1_HUMAN;tr|K7EM49|K7EM49_HUMAN;tr|K7EPF6|K7EPF6_HUMAN;tr|K7EMN2|K7EMN2_HUMAN;tr|K7ELN9|K7ELN9_HUMAN	sp|P52209|6PGD_HUMAN;tr|B4E2U0|B4E2U0_HUMAN;tr|B4DL86|B4DL86_HUMAN;tr|B4DV68|B4DV68_HUMAN;tr|A9Z1X1|A9Z1X1_HUMAN	sp|P52209|6PGD_HUMAN 6-phosphogluconate dehydrogenase, decarboxylating OS=Homo sapiens OX=9606 GN=PGD PE=1 SV=3;tr|B4E2U0|B4E2U0_HUMAN 6-phosphogluconate dehydrogenase, decarboxylating OS=Homo sapiens OX=9606 PE=2 SV=1;tr|B4DL86|B4DL86_HUMAN 6-phosphogluco	436930000	426670000	458270000	437780000	406420000	423880000	438480000	463050000
sp|P52272|HNRPM_HUMAN;tr|A0A087X0X3|A0A087X0X3_HUMAN;tr|Q7KYM9|Q7KYM9_HUMAN;tr|Q59ES8|Q59ES8_HUMAN;tr|M0R019|M0R019_HUMAN;tr|B4DEG4|B4DEG4_HUMAN;tr|M0R2T0|M0R2T0_HUMAN;tr|M0QZM1|M0QZM1_HUMAN;tr|Q6P2D7|Q6P2D7_HUMAN;tr|M0R0N3|M0R0N3_HUMAN;tr|M0R2I7|M0R2I7_HUMAN;tr|M0QYQ7|M0QYQ7_HUMAN;tr|M0R0Y6|M0R0Y6_HUMAN;tr|M0QY96|M0QY96_HUMAN;tr|M0QYL3|M0QYL3_HUMAN;tr|Q8TCM5|Q8TCM5_HUMAN	sp|P52272|HNRPM_HUMAN;tr|A0A087X0X3|A0A087X0X3_HUMAN;tr|Q7KYM9|Q7KYM9_HUMAN;tr|Q59ES8|Q59ES8_HUMAN	sp|P52272|HNRPM_HUMAN Heterogeneous nuclear ribonucleoprotein M OS=Homo sapiens OX=9606 GN=HNRNPM PE=1 SV=3;tr|A0A087X0X3|A0A087X0X3_HUMAN Heterogeneous nuclear ribonucleoprotein M OS=Homo sapiens OX=9606 GN=HNRNPM PE=1 SV=1;tr|Q7KYM9|Q7KYM9_HUMAN ORF prot	1052400000	1037900000	945740000	1100300000	1138200000	1098100000	1032800000	1022400000
sp|P52306|GDS1_HUMAN;tr|B3KNU0|B3KNU0_HUMAN;tr|B7Z2V8|B7Z2V8_HUMAN;tr|B7Z4M5|B7Z4M5_HUMAN;tr|Q6U7G8|Q6U7G8_HUMAN;tr|H0Y8M2|H0Y8M2_HUMAN;tr|D6RHH8|D6RHH8_HUMAN;tr|D6REZ0|D6REZ0_HUMAN;tr|D6RHZ7|D6RHZ7_HUMAN;tr|D6RBC6|D6RBC6_HUMAN;tr|D6RB97|D6RB97_HUMAN	sp|P52306|GDS1_HUMAN;tr|B3KNU0|B3KNU0_HUMAN;tr|B7Z2V8|B7Z2V8_HUMAN;tr|B7Z4M5|B7Z4M5_HUMAN;tr|Q6U7G8|Q6U7G8_HUMAN	sp|P52306|GDS1_HUMAN Rap1 GTPase-GDP dissociation stimulator 1 OS=Homo sapiens OX=9606 GN=RAP1GDS1 PE=1 SV=3;tr|B3KNU0|B3KNU0_HUMAN cDNA FLJ30470 fis, clone BRAWH1000040, highly similar to Rap1 GTPase-GDP dissociation stimulator 1 OS=Homo sapiens OX=9606 P	70871000	70720000	78118000	71743000	84098000	83433000	87557000	77884000
sp|P52701|MSH6_HUMAN;tr|A0A087WWJ1|A0A087WWJ1_HUMAN;tr|Q1L838|Q1L838_HUMAN;tr|A0A087WYT6|A0A087WYT6_HUMAN;tr|F8W7G9|F8W7G9_HUMAN;tr|F8WAX8|F8WAX8_HUMAN;tr|Q3SWU9|Q3SWU9_HUMAN;tr|Q6LAI4|Q6LAI4_HUMAN	sp|P52701|MSH6_HUMAN;tr|A0A087WWJ1|A0A087WWJ1_HUMAN;tr|Q1L838|Q1L838_HUMAN	sp|P52701|MSH6_HUMAN DNA mismatch repair protein Msh6 OS=Homo sapiens OX=9606 GN=MSH6 PE=1 SV=2;tr|A0A087WWJ1|A0A087WWJ1_HUMAN DNA mismatch repair protein Msh6 OS=Homo sapiens OX=9606 GN=MSH6 PE=1 SV=1;tr|Q1L838|Q1L838_HUMAN GTBP-ALT OS=Homo sapiens OX=960	42905000	40705000	37770000	45630000	54274000	50881000	53369000	54669000
sp|P52788|SPSY_HUMAN;tr|B4DE40|B4DE40_HUMAN;tr|H7C2R7|H7C2R7_HUMAN	sp|P52788|SPSY_HUMAN;tr|B4DE40|B4DE40_HUMAN	sp|P52788|SPSY_HUMAN Spermine synthase OS=Homo sapiens OX=9606 GN=SMS PE=1 SV=2;tr|B4DE40|B4DE40_HUMAN cDNA FLJ50114, highly similar to Spermine synthase (EC 2.5.1.22) OS=Homo sapiens OX=9606 PE=2 SV=1	382290000	362120000	380700000	327350000	297560000	311700000	299520000	295120000
sp|P52948|NUP98_HUMAN;tr|H7C3P6|H7C3P6_HUMAN;tr|A0A024RCC4|A0A024RCC4_HUMAN;tr|A8KA17|A8KA17_HUMAN;tr|H0YCT1|H0YCT1_HUMAN;tr|B4DWF8|B4DWF8_HUMAN;tr|H0YDF4|H0YDF4_HUMAN;tr|Q86TI1|Q86TI1_HUMAN;tr|A0A1D8GZ64|A0A1D8GZ64_HUMAN;tr|A0A1D8GZ55|A0A1D8GZ55_HUMAN;tr|A0A1D8GZ56|A0A1D8GZ56_HUMAN	sp|P52948|NUP98_HUMAN;tr|H7C3P6|H7C3P6_HUMAN	sp|P52948|NUP98_HUMAN Nuclear pore complex protein Nup98-Nup96 OS=Homo sapiens OX=9606 GN=NUP98 PE=1 SV=4;tr|H7C3P6|H7C3P6_HUMAN Nuclear pore complex protein Nup98-Nup96 (Fragment) OS=Homo sapiens OX=9606 GN=NUP98 PE=1 SV=1	34580000	32384000	34543000	31266000	41508000	34168000	40723000	31458000
sp|P53618|COPB_HUMAN;tr|E9PP73|E9PP73_HUMAN;tr|E9PP63|E9PP63_HUMAN;tr|E9PKQ1|E9PKQ1_HUMAN	sp|P53618|COPB_HUMAN;tr|E9PP73|E9PP73_HUMAN	sp|P53618|COPB_HUMAN Coatomer subunit beta OS=Homo sapiens OX=9606 GN=COPB1 PE=1 SV=3;tr|E9PP73|E9PP73_HUMAN Coatomer subunit beta (Fragment) OS=Homo sapiens OX=9606 GN=COPB1 PE=1 SV=8	752480000	765030000	724460000	763570000	790790000	763030000	728940000	756840000
sp|P53621|COPA_HUMAN	sp|P53621|COPA_HUMAN	sp|P53621|COPA_HUMAN Coatomer subunit alpha OS=Homo sapiens OX=9606 GN=COPA PE=1 SV=2	365390000	344890000	350960000	392720000	296730000	312240000	338740000	330970000
sp|P54136|SYRC_HUMAN;tr|B4DXW6|B4DXW6_HUMAN;tr|E5RJM9|E5RJM9_HUMAN;tr|E5RH09|E5RH09_HUMAN;tr|E5RI24|E5RI24_HUMAN	sp|P54136|SYRC_HUMAN;tr|B4DXW6|B4DXW6_HUMAN	sp|P54136|SYRC_HUMAN Arginine--tRNA ligase, cytoplasmic OS=Homo sapiens OX=9606 GN=RARS PE=1 SV=2;tr|B4DXW6|B4DXW6_HUMAN cDNA FLJ50285, highly similar to Arginyl-tRNA synthetase (EC 6.1.1.19) OS=Homo sapiens OX=9606 PE=2 SV=1	476610000	471040000	448120000	461240000	454280000	465950000	470030000	485920000
sp|P54578|UBP14_HUMAN;tr|A6NJA2|A6NJA2_HUMAN;tr|B2RD79|B2RD79_HUMAN;tr|B3KTG4|B3KTG4_HUMAN;tr|D3DUG9|D3DUG9_HUMAN;tr|J3QQT6|J3QQT6_HUMAN;tr|J3KS55|J3KS55_HUMAN	sp|P54578|UBP14_HUMAN;tr|A6NJA2|A6NJA2_HUMAN;tr|B2RD79|B2RD79_HUMAN;tr|B3KTG4|B3KTG4_HUMAN;tr|D3DUG9|D3DUG9_HUMAN	sp|P54578|UBP14_HUMAN Ubiquitin carboxyl-terminal hydrolase 14 OS=Homo sapiens OX=9606 GN=USP14 PE=1 SV=3;tr|A6NJA2|A6NJA2_HUMAN Ubiquitin carboxyl-terminal hydrolase 14 OS=Homo sapiens OX=9606 GN=USP14 PE=1 SV=2;tr|B2RD79|B2RD79_HUMAN cDNA, FLJ96494, high	318140000	310770000	321660000	346240000	298850000	305420000	301140000	293850000
sp|P54727|RD23B_HUMAN;tr|B4DEA3|B4DEA3_HUMAN;tr|B7Z4W4|B7Z4W4_HUMAN;tr|Q53F10|Q53F10_HUMAN;tr|B7ZA74|B7ZA74_HUMAN;tr|Q5W0S5|Q5W0S5_HUMAN;tr|H0Y579|H0Y579_HUMAN;tr|Q5W0S4|Q5W0S4_HUMAN	sp|P54727|RD23B_HUMAN;tr|B4DEA3|B4DEA3_HUMAN;tr|B7Z4W4|B7Z4W4_HUMAN;tr|Q53F10|Q53F10_HUMAN;tr|B7ZA74|B7ZA74_HUMAN	sp|P54727|RD23B_HUMAN UV excision repair protein RAD23 homolog B OS=Homo sapiens OX=9606 GN=RAD23B PE=1 SV=1;tr|B4DEA3|B4DEA3_HUMAN cDNA FLJ56531, highly similar to UV excision repair protein RAD23 homolog B OS=Homo sapiens OX=9606 PE=2 SV=1;tr|B7Z4W4|B7Z4	516060000	489650000	545530000	546100000	426740000	413860000	468000000	481610000
sp|P54886|P5CS_HUMAN	sp|P54886|P5CS_HUMAN	sp|P54886|P5CS_HUMAN Delta-1-pyrroline-5-carboxylate synthase OS=Homo sapiens OX=9606 GN=ALDH18A1 PE=1 SV=2	94975000	91155000	92584000	92227000	81055000	81835000	107450000	95623000
sp|P55036|PSMD4_HUMAN;tr|Q5VWC4|Q5VWC4_HUMAN;tr|A6PVX3|A6PVX3_HUMAN;tr|H0Y3Y9|H0Y3Y9_HUMAN;sp|A2A3N6|PIPSL_HUMAN;tr|H0Y561|H0Y561_HUMAN	sp|P55036|PSMD4_HUMAN;tr|Q5VWC4|Q5VWC4_HUMAN;tr|A6PVX3|A6PVX3_HUMAN	sp|P55036|PSMD4_HUMAN 26S proteasome non-ATPase regulatory subunit 4 OS=Homo sapiens OX=9606 GN=PSMD4 PE=1 SV=1;tr|Q5VWC4|Q5VWC4_HUMAN 26S proteasome non-ATPase regulatory subunit 4 OS=Homo sapiens OX=9606 GN=PSMD4 PE=1 SV=1;tr|A6PVX3|A6PVX3_HUMAN 26S prot	204370000	185350000	199130000	180760000	189030000	190080000	186060000	200910000
sp|P55060|XPO2_HUMAN;tr|B4DM31|B4DM31_HUMAN;tr|B4DUC5|B4DUC5_HUMAN;tr|B4DM67|B4DM67_HUMAN;tr|B4DPS6|B4DPS6_HUMAN;tr|B4DS32|B4DS32_HUMAN	sp|P55060|XPO2_HUMAN;tr|B4DM31|B4DM31_HUMAN;tr|B4DUC5|B4DUC5_HUMAN;tr|B4DM67|B4DM67_HUMAN;tr|B4DPS6|B4DPS6_HUMAN	sp|P55060|XPO2_HUMAN Exportin-2 OS=Homo sapiens OX=9606 GN=CSE1L PE=1 SV=3;tr|B4DM31|B4DM31_HUMAN cDNA FLJ54022, highly similar to Exportin-2 OS=Homo sapiens OX=9606 PE=2 SV=1;tr|B4DUC5|B4DUC5_HUMAN cDNA FLJ53202, highly similar to Exportin-2 OS=Homo sapie	5617000000	5574700000	5648900000	5589500000	5773400000	5841600000	5941500000	6145900000
sp|P55081|MFAP1_HUMAN	sp|P55081|MFAP1_HUMAN	sp|P55081|MFAP1_HUMAN Microfibrillar-associated protein 1 OS=Homo sapiens OX=9606 GN=MFAP1 PE=1 SV=2	17259000	17257000	13914000	17856000	20015000	19806000	16601000	17240000
sp|P55084|ECHB_HUMAN;tr|F5GZQ3|F5GZQ3_HUMAN;tr|B4DY96|B4DY96_HUMAN;tr|D6W539|D6W539_HUMAN;tr|B4DDC9|B4DDC9_HUMAN;tr|B5MD38|B5MD38_HUMAN;tr|C9JEY0|C9JEY0_HUMAN;tr|C9JE81|C9JE81_HUMAN;tr|C9K0M0|C9K0M0_HUMAN;tr|Q92799|Q92799_HUMAN	sp|P55084|ECHB_HUMAN;tr|F5GZQ3|F5GZQ3_HUMAN;tr|B4DY96|B4DY96_HUMAN;tr|D6W539|D6W539_HUMAN;tr|B4DDC9|B4DDC9_HUMAN;tr|B5MD38|B5MD38_HUMAN	sp|P55084|ECHB_HUMAN Trifunctional enzyme subunit beta, mitochondrial OS=Homo sapiens OX=9606 GN=HADHB PE=1 SV=3;tr|F5GZQ3|F5GZQ3_HUMAN Trifunctional enzyme subunit beta, mitochondrial OS=Homo sapiens OX=9606 GN=HADHB PE=1 SV=1;tr|B4DY96|B4DY96_HUMAN cDNA	152350000	145660000	153660000	151750000	136310000	138190000	146210000	139660000
sp|P55145|MANF_HUMAN;tr|A8K878|A8K878_HUMAN;tr|H7C2D6|H7C2D6_HUMAN	sp|P55145|MANF_HUMAN;tr|A8K878|A8K878_HUMAN	sp|P55145|MANF_HUMAN Mesencephalic astrocyte-derived neurotrophic factor OS=Homo sapiens OX=9606 GN=MANF PE=1 SV=3;tr|A8K878|A8K878_HUMAN Mesencephalic astrocyte-derived neurotrophic factor OS=Homo sapiens OX=9606 GN=MANF PE=1 SV=1	109250000	99620000	101030000	105350000	97132000	93253000	87765000	79596000
sp|P55263|ADK_HUMAN;tr|Q86U79|Q86U79_HUMAN;tr|A0A140VJE0|A0A140VJE0_HUMAN	sp|P55263|ADK_HUMAN;tr|Q86U79|Q86U79_HUMAN;tr|A0A140VJE0|A0A140VJE0_HUMAN	sp|P55263|ADK_HUMAN Adenosine kinase OS=Homo sapiens OX=9606 GN=ADK PE=1 SV=2;tr|Q86U79|Q86U79_HUMAN Adenosine kinase OS=Homo sapiens OX=9606 PE=2 SV=1;tr|A0A140VJE0|A0A140VJE0_HUMAN Testicular tissue protein Li 14 OS=Homo sapiens OX=9606 PE=2 SV=1	115940000	107160000	120420000	118310000	99068000	99188000	100730000	112440000
sp|P55327|TPD52_HUMAN;tr|H0YC42|H0YC42_HUMAN;tr|A5Y5A3|A5Y5A3_HUMAN;tr|E5RFR7|E5RFR7_HUMAN;tr|H0YC44|H0YC44_HUMAN;tr|E5RK35|E5RK35_HUMAN	sp|P55327|TPD52_HUMAN;tr|H0YC42|H0YC42_HUMAN;tr|A5Y5A3|A5Y5A3_HUMAN;tr|E5RFR7|E5RFR7_HUMAN;tr|H0YC44|H0YC44_HUMAN	sp|P55327|TPD52_HUMAN Tumor protein D52 OS=Homo sapiens OX=9606 GN=TPD52 PE=1 SV=2;tr|H0YC42|H0YC42_HUMAN Uncharacterized protein OS=Homo sapiens OX=9606 PE=4 SV=2;tr|A5Y5A3|A5Y5A3_HUMAN PC1/MRPS28 fusion protein OS=Homo sapiens OX=9606 PE=2 SV=1;tr|E5RFR7	41407000	41238000	50269000	49298000	42230000	43500000	38330000	48118000
sp|P55735|SEC13_HUMAN;tr|Q53GB2|Q53GB2_HUMAN;tr|A8MXL6|A8MXL6_HUMAN;tr|Q59FA6|Q59FA6_HUMAN;tr|A4UCS7|A4UCS7_HUMAN;tr|A8MWR8|A8MWR8_HUMAN;tr|E7ERC8|E7ERC8_HUMAN	sp|P55735|SEC13_HUMAN;tr|Q53GB2|Q53GB2_HUMAN;tr|A8MXL6|A8MXL6_HUMAN;tr|Q59FA6|Q59FA6_HUMAN	sp|P55735|SEC13_HUMAN Protein SEC13 homolog OS=Homo sapiens OX=9606 GN=SEC13 PE=1 SV=3;tr|Q53GB2|Q53GB2_HUMAN SEC13-like 1 isoform b variant (Fragment) OS=Homo sapiens OX=9606 PE=2 SV=1;tr|A8MXL6|A8MXL6_HUMAN Protein SEC13 homolog OS=Homo sapiens OX=9606 G	161700000	158850000	139480000	159370000	139820000	157590000	127850000	139210000
sp|P55795|HNRH2_HUMAN;tr|B4DFK9|B4DFK9_HUMAN;tr|B4DP00|B4DP00_HUMAN	sp|P55795|HNRH2_HUMAN;tr|B4DFK9|B4DFK9_HUMAN;tr|B4DP00|B4DP00_HUMAN	sp|P55795|HNRH2_HUMAN Heterogeneous nuclear ribonucleoprotein H2 OS=Homo sapiens OX=9606 GN=HNRNPH2 PE=1 SV=1;tr|B4DFK9|B4DFK9_HUMAN cDNA FLJ57964, highly similar to Heterogeneous nuclear ribonucleoprotein H OS=Homo sapiens OX=9606 PE=2 SV=1;tr|B4DP00|B4D	79187000	70743000	73693000	80151000	76326000	77016000	67550000	67914000
sp|P56537|IF6_HUMAN;tr|B7ZBH1|B7ZBH1_HUMAN;tr|A0A0U1RQV5|A0A0U1RQV5_HUMAN;tr|F8WD20|F8WD20_HUMAN;tr|B4DJH0|B4DJH0_HUMAN;tr|A0A0B4J1Y7|A0A0B4J1Y7_HUMAN;tr|F8WDS6|F8WDS6_HUMAN	sp|P56537|IF6_HUMAN	sp|P56537|IF6_HUMAN Eukaryotic translation initiation factor 6 OS=Homo sapiens OX=9606 GN=EIF6 PE=1 SV=1	632750000	632220000	789800000	622640000	694480000	691210000	659060000	683460000
sp|P59998|ARPC4_HUMAN;tr|F8WCF6|F8WCF6_HUMAN;tr|F8WDD7|F8WDD7_HUMAN;tr|H7C0A3|H7C0A3_HUMAN;tr|A0A0A6YYG9|A0A0A6YYG9_HUMAN;tr|Q9H7Z5|Q9H7Z5_HUMAN;tr|R4GN08|R4GN08_HUMAN;tr|F8WDW3|F8WDW3_HUMAN;tr|F8WE39|F8WE39_HUMAN	sp|P59998|ARPC4_HUMAN;tr|F8WCF6|F8WCF6_HUMAN;tr|F8WDD7|F8WDD7_HUMAN;tr|H7C0A3|H7C0A3_HUMAN;tr|A0A0A6YYG9|A0A0A6YYG9_HUMAN;tr|Q9H7Z5|Q9H7Z5_HUMAN	sp|P59998|ARPC4_HUMAN Actin-related protein 2/3 complex subunit 4 OS=Homo sapiens OX=9606 GN=ARPC4 PE=1 SV=3;tr|F8WCF6|F8WCF6_HUMAN Actin-related protein 2/3 complex subunit 4 OS=Homo sapiens OX=9606 GN=ARPC4-TTLL3 PE=3 SV=1;tr|F8WDD7|F8WDD7_HUMAN Actin-re	268380000	266750000	267420000	255520000	300400000	293900000	271460000	316310000
sp|P60842|IF4A1_HUMAN;tr|A8K7F6|A8K7F6_HUMAN;tr|A8K088|A8K088_HUMAN;tr|J3KT12|J3KT12_HUMAN;tr|Q59F68|Q59F68_HUMAN;tr|J3QS69|J3QS69_HUMAN;tr|J3KTB5|J3KTB5_HUMAN;tr|B4DNH2|B4DNH2_HUMAN;tr|J3QL43|J3QL43_HUMAN;tr|J3KSZ0|J3KSZ0_HUMAN;tr|J3QR64|J3QR64_HUMAN;tr|J3QLN6|J3QLN6_HUMAN;tr|B4E047|B4E047_HUMAN;tr|J3KTN0|J3KTN0_HUMAN;tr|J3QKZ9|J3QKZ9_HUMAN;tr|J3KS25|J3KS25_HUMAN;tr|B4DKP9|B4DKP9_HUMAN;tr|B4E102…	sp|P60842|IF4A1_HUMAN;tr|A8K7F6|A8K7F6_HUMAN;tr|A8K088|A8K088_HUMAN;tr|J3KT12|J3KT12_HUMAN;tr|Q59F68|Q59F68_HUMAN;tr|J3QS69|J3QS69_HUMAN;tr|J3KTB5|J3KTB5_HUMAN;tr|B4DNH2|B4DNH2_HUMAN;tr|J3QL43|J3QL43_HUMAN;tr|J3KSZ0|J3KSZ0_HUMAN	sp|P60842|IF4A1_HUMAN Eukaryotic initiation factor 4A-I OS=Homo sapiens OX=9606 GN=EIF4A1 PE=1 SV=1;tr|A8K7F6|A8K7F6_HUMAN cDNA FLJ78244, highly similar to Homo sapiens eukaryotic translation initiation factor 4A, isoform 1 (EIF4A1), mRNA OS=Homo sapiens O	2522700000	2437600000	2175700000	2464800000	2670200000	2802000000	2806200000	2802400000
sp|P60866|RS20_HUMAN;tr|E5RJX2|E5RJX2_HUMAN;tr|E5RIP1|E5RIP1_HUMAN;tr|G3XAN0|G3XAN0_HUMAN	sp|P60866|RS20_HUMAN;tr|E5RJX2|E5RJX2_HUMAN;tr|E5RIP1|E5RIP1_HUMAN	sp|P60866|RS20_HUMAN 40S ribosomal protein S20 OS=Homo sapiens OX=9606 GN=RPS20 PE=1 SV=1;tr|E5RJX2|E5RJX2_HUMAN 40S ribosomal protein S20 OS=Homo sapiens OX=9606 GN=RPS20 PE=1 SV=1;tr|E5RIP1|E5RIP1_HUMAN 40S ribosomal protein S20 OS=Homo sapiens OX=9606 G	493080000	494730000	507740000	467620000	457410000	453490000	512860000	573500000
sp|P60983|GMFB_HUMAN;tr|G3V4P8|G3V4P8_HUMAN;tr|M0QYG8|M0QYG8_HUMAN;tr|M0R1D2|M0R1D2_HUMAN;tr|M0R0C1|M0R0C1_HUMAN;tr|Q59G69|Q59G69_HUMAN;tr|M0QYJ8|M0QYJ8_HUMAN;sp|O60234|GMFG_HUMAN;tr|G3V3X4|G3V3X4_HUMAN;tr|Q8TDZ6|Q8TDZ6_HUMAN	sp|P60983|GMFB_HUMAN;tr|G3V4P8|G3V4P8_HUMAN	sp|P60983|GMFB_HUMAN Glia maturation factor beta OS=Homo sapiens OX=9606 GN=GMFB PE=1 SV=2;tr|G3V4P8|G3V4P8_HUMAN Glia maturation factor beta (Fragment) OS=Homo sapiens OX=9606 GN=GMFB PE=1 SV=1	184300000	180490000	187760000	209190000	152190000	150840000	157210000	150140000
sp|P61011|SRP54_HUMAN;tr|G3V4F7|G3V4F7_HUMAN;tr|B4DDS7|B4DDS7_HUMAN;tr|G3V346|G3V346_HUMAN;tr|A0A0D9SFN7|A0A0D9SFN7_HUMAN;tr|G3V3L9|G3V3L9_HUMAN;tr|G3V480|G3V480_HUMAN	sp|P61011|SRP54_HUMAN;tr|G3V4F7|G3V4F7_HUMAN;tr|B4DDS7|B4DDS7_HUMAN	sp|P61011|SRP54_HUMAN Signal recognition particle 54 kDa protein OS=Homo sapiens OX=9606 GN=SRP54 PE=1 SV=1;tr|G3V4F7|G3V4F7_HUMAN Signal recognition particle 54 kDa protein OS=Homo sapiens OX=9606 GN=SRP54 PE=1 SV=1;tr|B4DDS7|B4DDS7_HUMAN Signal recogniti	26890000	35059000	34045000	41912000	26492000	25008000	28345000	24579000
sp|P61026|RAB10_HUMAN;tr|Q53T70|Q53T70_HUMAN	sp|P61026|RAB10_HUMAN;tr|Q53T70|Q53T70_HUMAN	sp|P61026|RAB10_HUMAN Ras-related protein Rab-10 OS=Homo sapiens OX=9606 GN=RAB10 PE=1 SV=1;tr|Q53T70|Q53T70_HUMAN Uncharacterized protein RAB10 (Fragment) OS=Homo sapiens OX=9606 GN=RAB10 PE=4 SV=1	410990000	390220000	348270000	365640000	439260000	422100000	427830000	445150000
sp|P61086|UBE2K_HUMAN;tr|B4DIZ2|B4DIZ2_HUMAN;tr|D6RDM7|D6RDM7_HUMAN;tr|B3KSH4|B3KSH4_HUMAN;tr|D6RFX1|D6RFX1_HUMAN	sp|P61086|UBE2K_HUMAN;tr|B4DIZ2|B4DIZ2_HUMAN;tr|D6RDM7|D6RDM7_HUMAN;tr|B3KSH4|B3KSH4_HUMAN	sp|P61086|UBE2K_HUMAN Ubiquitin-conjugating enzyme E2 K OS=Homo sapiens OX=9606 GN=UBE2K PE=1 SV=3;tr|B4DIZ2|B4DIZ2_HUMAN cDNA FLJ57995, moderately similar to Ubiquitin-conjugating enzyme E2-25 kDa (EC 6.3.2.19) OS=Homo sapiens OX=9606 PE=2 SV=1;tr|D6RDM7|	89725000	87131000	97569000	100150000	87586000	89816000	97919000	94194000
sp|P61160|ARP2_HUMAN;tr|Q8IY98|Q8IY98_HUMAN;tr|F5H6T1|F5H6T1_HUMAN;tr|B4DHK9|B4DHK9_HUMAN;tr|B4DWQ5|B4DWQ5_HUMAN;tr|A0A1B0GWD0|A0A1B0GWD0_HUMAN;tr|A0A1B0GWH0|A0A1B0GWH0_HUMAN	sp|P61160|ARP2_HUMAN;tr|Q8IY98|Q8IY98_HUMAN;tr|F5H6T1|F5H6T1_HUMAN;tr|B4DHK9|B4DHK9_HUMAN;tr|B4DWQ5|B4DWQ5_HUMAN	sp|P61160|ARP2_HUMAN Actin-related protein 2 OS=Homo sapiens OX=9606 GN=ACTR2 PE=1 SV=1;tr|Q8IY98|Q8IY98_HUMAN ACTR2 protein OS=Homo sapiens OX=9606 GN=ACTR2 PE=2 SV=1;tr|F5H6T1|F5H6T1_HUMAN ARP2 actin-related protein 2 homolog (Yeast), isoform CRA_d OS=Ho	309420000	322530000	315990000	332380000	350700000	339970000	344510000	366870000
sp|P61201|CSN2_HUMAN;tr|Q59EL2|Q59EL2_HUMAN;tr|B4DIH5|B4DIH5_HUMAN;tr|Q53HJ0|Q53HJ0_HUMAN;tr|B2R6N0|B2R6N0_HUMAN;tr|H0YKU5|H0YKU5_HUMAN;tr|H0YM03|H0YM03_HUMAN	sp|P61201|CSN2_HUMAN;tr|Q59EL2|Q59EL2_HUMAN;tr|B4DIH5|B4DIH5_HUMAN;tr|Q53HJ0|Q53HJ0_HUMAN;tr|B2R6N0|B2R6N0_HUMAN;tr|H0YKU5|H0YKU5_HUMAN	sp|P61201|CSN2_HUMAN COP9 signalosome complex subunit 2 OS=Homo sapiens OX=9606 GN=COPS2 PE=1 SV=1;tr|Q59EL2|Q59EL2_HUMAN COP9 constitutive photomorphogenic homolog subunit 2 variant (Fragment) OS=Homo sapiens OX=9606 PE=2 SV=1;tr|B4DIH5|B4DIH5_HUMAN COP9	68270000	64291000	56784000	62353000	70070000	72375000	69414000	74822000
sp|P61221|ABCE1_HUMAN;tr|D6R9I9|D6R9I9_HUMAN;tr|D6RGF4|D6RGF4_HUMAN;tr|H0Y990|H0Y990_HUMAN	sp|P61221|ABCE1_HUMAN;tr|D6R9I9|D6R9I9_HUMAN	sp|P61221|ABCE1_HUMAN ATP-binding cassette sub-family E member 1 OS=Homo sapiens OX=9606 GN=ABCE1 PE=1 SV=1;tr|D6R9I9|D6R9I9_HUMAN ATP-binding cassette sub-family E member 1 OS=Homo sapiens OX=9606 GN=ABCE1 PE=1 SV=1	136060000	136630000	146040000	151870000	154580000	174290000	190320000	176690000
sp|P61758|PFD3_HUMAN;tr|D3DWY7|D3DWY7_HUMAN;tr|Q6FH24|Q6FH24_HUMAN;tr|B4DWR3|B4DWR3_HUMAN	sp|P61758|PFD3_HUMAN;tr|D3DWY7|D3DWY7_HUMAN;tr|Q6FH24|Q6FH24_HUMAN;tr|B4DWR3|B4DWR3_HUMAN	sp|P61758|PFD3_HUMAN Prefoldin subunit 3 OS=Homo sapiens OX=9606 GN=VBP1 PE=1 SV=3;tr|D3DWY7|D3DWY7_HUMAN Prefoldin subunit 3 OS=Homo sapiens OX=9606 GN=VBP1 PE=3 SV=1;tr|Q6FH24|Q6FH24_HUMAN Prefoldin subunit 3 OS=Homo sapiens OX=9606 GN=VBP1 PE=2 SV=1;tr|	45581000	58846000	54551000	62849000	44746000	55835000	61045000	45711000
sp|P61769|B2MG_HUMAN;tr|B4E0X1|B4E0X1_HUMAN;tr|H0YLF3|H0YLF3_HUMAN;tr|A6XMH5|A6XMH5_HUMAN;tr|F5H6I0|F5H6I0_HUMAN;tr|A6XND9|A6XND9_HUMAN;tr|A6XMH4|A6XMH4_HUMAN	sp|P61769|B2MG_HUMAN;tr|B4E0X1|B4E0X1_HUMAN;tr|H0YLF3|H0YLF3_HUMAN;tr|A6XMH5|A6XMH5_HUMAN;tr|F5H6I0|F5H6I0_HUMAN;tr|A6XND9|A6XND9_HUMAN;tr|A6XMH4|A6XMH4_HUMAN	sp|P61769|B2MG_HUMAN Beta-2-microglobulin OS=Homo sapiens OX=9606 GN=B2M PE=1 SV=1;tr|B4E0X1|B4E0X1_HUMAN Beta-2-microglobulin OS=Homo sapiens OX=9606 PE=2 SV=1;tr|H0YLF3|H0YLF3_HUMAN Beta-2-microglobulin (Fragment) OS=Homo sapiens OX=9606 GN=B2M PE=1 SV=1	78743000	88176000	79279000	96373000	91993000	84683000	91394000	88325000
sp|P61981|1433G_HUMAN;tr|B3KNB4|B3KNB4_HUMAN;tr|B4DHC4|B4DHC4_HUMAN;tr|B4DE78|B4DE78_HUMAN	sp|P61981|1433G_HUMAN;tr|B3KNB4|B3KNB4_HUMAN;tr|B4DHC4|B4DHC4_HUMAN;tr|B4DE78|B4DE78_HUMAN	sp|P61981|1433G_HUMAN 14-3-3 protein gamma OS=Homo sapiens OX=9606 GN=YWHAG PE=1 SV=2;tr|B3KNB4|B3KNB4_HUMAN cDNA FLJ14168 fis, clone NT2RP2001440, highly similar to 14-3-3 protein gamma OS=Homo sapiens OX=9606 PE=2 SV=1;tr|B4DHC4|B4DHC4_HUMAN cDNA FLJ5184	365910000	356780000	408780000	374500000	328000000	317630000	372980000	370070000
sp|P62070|RRAS2_HUMAN;tr|E9PK85|E9PK85_HUMAN	sp|P62070|RRAS2_HUMAN;tr|E9PK85|E9PK85_HUMAN	sp|P62070|RRAS2_HUMAN Ras-related protein R-Ras2 OS=Homo sapiens OX=9606 GN=RRAS2 PE=1 SV=1;tr|E9PK85|E9PK85_HUMAN Ras-related protein R-Ras2 (Fragment) OS=Homo sapiens OX=9606 GN=RRAS2 PE=1 SV=1	58501000	50574000	49458000	52014000	49047000	42480000	41855000	48675000
sp|P62081|RS7_HUMAN;tr|B5MCP9|B5MCP9_HUMAN;tr|Q59FS3|Q59FS3_HUMAN	sp|P62081|RS7_HUMAN;tr|B5MCP9|B5MCP9_HUMAN	sp|P62081|RS7_HUMAN 40S ribosomal protein S7 OS=Homo sapiens OX=9606 GN=RPS7 PE=1 SV=1;tr|B5MCP9|B5MCP9_HUMAN 40S ribosomal protein S7 OS=Homo sapiens OX=9606 GN=RPS7 PE=1 SV=1	550530000	588460000	601600000	604110000	648040000	590310000	619330000	628130000
sp|P62136|PP1A_HUMAN;tr|A0A140VJS9|A0A140VJS9_HUMAN;tr|B3KXM2|B3KXM2_HUMAN;tr|E9PMD7|E9PMD7_HUMAN;tr|F5H1L6|F5H1L6_HUMAN;tr|F5H037|F5H037_HUMAN;tr|C0STL0|C0STL0_HUMAN	sp|P62136|PP1A_HUMAN;tr|A0A140VJS9|A0A140VJS9_HUMAN;tr|B3KXM2|B3KXM2_HUMAN;tr|E9PMD7|E9PMD7_HUMAN	sp|P62136|PP1A_HUMAN Serine/threonine-protein phosphatase PP1-alpha catalytic subunit OS=Homo sapiens OX=9606 GN=PPP1CA PE=1 SV=1;tr|A0A140VJS9|A0A140VJS9_HUMAN Serine/threonine-protein phosphatase OS=Homo sapiens OX=9606 PE=2 SV=1;tr|B3KXM2|B3KXM2_HUMAN S	400960000	450320000	503490000	392370000	437210000	447000000	480220000	499140000
sp|P62249|RS16_HUMAN;tr|M0R210|M0R210_HUMAN;tr|M0R3H0|M0R3H0_HUMAN;tr|M0R1M5|M0R1M5_HUMAN;tr|Q6IPX4|Q6IPX4_HUMAN;tr|M0QX76|M0QX76_HUMAN	sp|P62249|RS16_HUMAN;tr|M0R210|M0R210_HUMAN;tr|M0R3H0|M0R3H0_HUMAN;tr|M0R1M5|M0R1M5_HUMAN;tr|Q6IPX4|Q6IPX4_HUMAN	sp|P62249|RS16_HUMAN 40S ribosomal protein S16 OS=Homo sapiens OX=9606 GN=RPS16 PE=1 SV=2;tr|M0R210|M0R210_HUMAN 40S ribosomal protein S16 OS=Homo sapiens OX=9606 GN=RPS16 PE=1 SV=1;tr|M0R3H0|M0R3H0_HUMAN 40S ribosomal protein S16 OS=Homo sapiens OX=9606 G	349890000	372340000	435490000	485140000	371370000	420000000	396550000	372650000
sp|P62263|RS14_HUMAN;tr|E5RH77|E5RH77_HUMAN;tr|H0YB22|H0YB22_HUMAN	sp|P62263|RS14_HUMAN;tr|E5RH77|E5RH77_HUMAN;tr|H0YB22|H0YB22_HUMAN	sp|P62263|RS14_HUMAN 40S ribosomal protein S14 OS=Homo sapiens OX=9606 GN=RPS14 PE=1 SV=3;tr|E5RH77|E5RH77_HUMAN 40S ribosomal protein S14 OS=Homo sapiens OX=9606 GN=RPS14 PE=1 SV=1;tr|H0YB22|H0YB22_HUMAN 40S ribosomal protein S14 (Fragment) OS=Homo sapien	364930000	404930000	473360000	496740000	418210000	390530000	447860000	430890000
sp|P62269|RS18_HUMAN;tr|A0A0G2JQH2|A0A0G2JQH2_HUMAN;tr|Q5GGW2|Q5GGW2_HUMAN;tr|J3JS69|J3JS69_HUMAN	sp|P62269|RS18_HUMAN	sp|P62269|RS18_HUMAN 40S ribosomal protein S18 OS=Homo sapiens OX=9606 GN=RPS18 PE=1 SV=3	495020000	499560000	572140000	592710000	524890000	562520000	522390000	514920000
sp|P62277|RS13_HUMAN;tr|J3KMX5|J3KMX5_HUMAN;tr|A7TZ25|A7TZ25_LEPSM;tr|E9PS50|E9PS50_HUMAN	sp|P62277|RS13_HUMAN;tr|J3KMX5|J3KMX5_HUMAN	sp|P62277|RS13_HUMAN 40S ribosomal protein S13 OS=Homo sapiens OX=9606 GN=RPS13 PE=1 SV=2;tr|J3KMX5|J3KMX5_HUMAN 40S ribosomal protein S13 OS=Homo sapiens OX=9606 GN=RPS13 PE=1 SV=1	309070000	315200000	381280000	392370000	303030000	394490000	358900000	278570000
sp|P62280|RS11_HUMAN;tr|M0QZC5|M0QZC5_HUMAN;tr|M0R1H5|M0R1H5_HUMAN;tr|M0R1H6|M0R1H6_HUMAN	sp|P62280|RS11_HUMAN;tr|M0QZC5|M0QZC5_HUMAN	sp|P62280|RS11_HUMAN 40S ribosomal protein S11 OS=Homo sapiens OX=9606 GN=RPS11 PE=1 SV=3;tr|M0QZC5|M0QZC5_HUMAN 40S ribosomal protein S11 OS=Homo sapiens OX=9606 GN=RPS11 PE=1 SV=1	517190000	512340000	680660000	702570000	453140000	528300000	623510000	612680000
sp|P62306|RUXF_HUMAN;tr|A0A0B4J254|A0A0B4J254_HUMAN;tr|F8W0W6|F8W0W6_HUMAN	sp|P62306|RUXF_HUMAN;tr|A0A0B4J254|A0A0B4J254_HUMAN;tr|F8W0W6|F8W0W6_HUMAN	sp|P62306|RUXF_HUMAN Small nuclear ribonucleoprotein F OS=Homo sapiens OX=9606 GN=SNRPF PE=1 SV=1;tr|A0A0B4J254|A0A0B4J254_HUMAN Small nuclear ribonucleoprotein F OS=Homo sapiens OX=9606 GN=SNRPF PE=1 SV=1;tr|F8W0W6|F8W0W6_HUMAN Small nuclear ribonucleopro	123460000	101290000	105120000	115310000	120070000	102590000	105880000	126780000
sp|P62310|LSM3_HUMAN;tr|B2R5H5|B2R5H5_HUMAN	sp|P62310|LSM3_HUMAN;tr|B2R5H5|B2R5H5_HUMAN	sp|P62310|LSM3_HUMAN U6 snRNA-associated Sm-like protein LSm3 OS=Homo sapiens OX=9606 GN=LSM3 PE=1 SV=2;tr|B2R5H5|B2R5H5_HUMAN cDNA, FLJ92476, highly similar to Homo sapiens LSM3 homolog, U6 small nuclear RNA associated (S. cerevisiae) (LSM3), mRNA OS=Homo	73433000	66960000	62410000	74467000	90920000	82244000	73954000	85555000
sp|P62314|SMD1_HUMAN;tr|Q7Z5A3|Q7Z5A3_HUMAN;tr|J3QLI9|J3QLI9_HUMAN;tr|J3QLR7|J3QLR7_HUMAN	sp|P62314|SMD1_HUMAN;tr|Q7Z5A3|Q7Z5A3_HUMAN;tr|J3QLI9|J3QLI9_HUMAN	sp|P62314|SMD1_HUMAN Small nuclear ribonucleoprotein Sm D1 OS=Homo sapiens OX=9606 GN=SNRPD1 PE=1 SV=1;tr|Q7Z5A3|Q7Z5A3_HUMAN Small nuclear ribonucleoprotein Sm D1 OS=Homo sapiens OX=9606 GN=SNRPD1 PE=2 SV=1;tr|J3QLI9|J3QLI9_HUMAN Small nuclear ribonucleop	91547000	111000000	143160000	175610000	61615000	106660000	124410000	67837000
sp|P62316|SMD2_HUMAN;tr|K7ERG4|K7ERG4_HUMAN;tr|K7EJB5|K7EJB5_HUMAN	sp|P62316|SMD2_HUMAN;tr|K7ERG4|K7ERG4_HUMAN	sp|P62316|SMD2_HUMAN Small nuclear ribonucleoprotein Sm D2 OS=Homo sapiens OX=9606 GN=SNRPD2 PE=1 SV=1;tr|K7ERG4|K7ERG4_HUMAN Small nuclear ribonucleoprotein Sm D2 OS=Homo sapiens OX=9606 GN=SNRPD2 PE=1 SV=1	347710000	337330000	344810000	358000000	343680000	329070000	341300000	353160000
sp|P62318|SMD3_HUMAN;tr|H3BT13|H3BT13_HUMAN	sp|P62318|SMD3_HUMAN;tr|H3BT13|H3BT13_HUMAN	sp|P62318|SMD3_HUMAN Small nuclear ribonucleoprotein Sm D3 OS=Homo sapiens OX=9606 GN=SNRPD3 PE=1 SV=1;tr|H3BT13|H3BT13_HUMAN Small nuclear ribonucleoprotein Sm D3 OS=Homo sapiens OX=9606 GN=SNRPD3 PE=1 SV=1	345120000	335560000	360330000	304440000	325510000	340810000	320650000	347170000
sp|P62333|PRS10_HUMAN;tr|A0A087X2I1|A0A087X2I1_HUMAN;tr|V9HW24|V9HW24_HUMAN;tr|H0YJC0|H0YJC0_HUMAN;tr|B4DR91|B4DR91_HUMAN;tr|H0YJS8|H0YJS8_HUMAN;tr|H0YJX2|H0YJX2_HUMAN;tr|H0YJE9|H0YJE9_HUMAN;tr|H0YJT1|H0YJT1_HUMAN	sp|P62333|PRS10_HUMAN;tr|A0A087X2I1|A0A087X2I1_HUMAN;tr|V9HW24|V9HW24_HUMAN	sp|P62333|PRS10_HUMAN 26S proteasome regulatory subunit 10B OS=Homo sapiens OX=9606 GN=PSMC6 PE=1 SV=1;tr|A0A087X2I1|A0A087X2I1_HUMAN 26S proteasome regulatory subunit 10B OS=Homo sapiens OX=9606 GN=PSMC6 PE=1 SV=1;tr|V9HW24|V9HW24_HUMAN Epididymis secreto	301130000	279370000	274840000	296290000	269010000	277900000	269840000	258180000
sp|P62424|RL7A_HUMAN;tr|Q9BY74|Q9BY74_HUMAN;tr|Q5T8U2|Q5T8U2_HUMAN;tr|Q5T8U3|Q5T8U3_HUMAN	sp|P62424|RL7A_HUMAN;tr|Q9BY74|Q9BY74_HUMAN;tr|Q5T8U2|Q5T8U2_HUMAN;tr|Q5T8U3|Q5T8U3_HUMAN	sp|P62424|RL7A_HUMAN 60S ribosomal protein L7a OS=Homo sapiens OX=9606 GN=RPL7A PE=1 SV=2;tr|Q9BY74|Q9BY74_HUMAN Ribosomal protein L7a (Fragment) OS=Homo sapiens OX=9606 GN=RP-L7a PE=2 SV=1;tr|Q5T8U2|Q5T8U2_HUMAN 60S ribosomal protein L7a OS=Homo sapiens O	473310000	548870000	647210000	638060000	322750000	538590000	523360000	453390000
sp|P62495|ERF1_HUMAN;tr|B7Z7P8|B7Z7P8_HUMAN;tr|I3L492|I3L492_HUMAN;tr|D6RJE8|D6RJE8_HUMAN;tr|D6RCB3|D6RCB3_HUMAN	sp|P62495|ERF1_HUMAN;tr|B7Z7P8|B7Z7P8_HUMAN	sp|P62495|ERF1_HUMAN Eukaryotic peptide chain release factor subunit 1 OS=Homo sapiens OX=9606 GN=ETF1 PE=1 SV=3;tr|B7Z7P8|B7Z7P8_HUMAN Eukaryotic peptide chain release factor subunit 1 OS=Homo sapiens OX=9606 GN=ETF1 PE=1 SV=1	191950000	190870000	199880000	190210000	222560000	213660000	220700000	230340000
sp|P62750|RL23A_HUMAN;tr|H7BY10|H7BY10_HUMAN;tr|K7EJV9|K7EJV9_HUMAN;tr|K7ERT8|K7ERT8_HUMAN;tr|A8MUS3|A8MUS3_HUMAN;tr|K7EMA7|K7EMA7_HUMAN;tr|Q53RC5|Q53RC5_HUMAN;tr|B9EJE3|B9EJE3_HUMAN	sp|P62750|RL23A_HUMAN;tr|H7BY10|H7BY10_HUMAN;tr|K7EJV9|K7EJV9_HUMAN;tr|K7ERT8|K7ERT8_HUMAN;tr|A8MUS3|A8MUS3_HUMAN;tr|K7EMA7|K7EMA7_HUMAN	sp|P62750|RL23A_HUMAN 60S ribosomal protein L23a OS=Homo sapiens OX=9606 GN=RPL23A PE=1 SV=1;tr|H7BY10|H7BY10_HUMAN 60S ribosomal protein L23a (Fragment) OS=Homo sapiens OX=9606 GN=RPL23A PE=1 SV=1;tr|K7EJV9|K7EJV9_HUMAN 60S ribosomal protein L23a (Fragmen	531810000	511350000	542710000	565350000	418220000	439550000	496160000	608870000
sp|P62826|RAN_HUMAN;tr|B5MDF5|B5MDF5_HUMAN;tr|J3KQE5|J3KQE5_HUMAN;tr|F5H018|F5H018_HUMAN;tr|Q8MJ37|Q8MJ37_PIG;tr|H0YFC6|H0YFC6_HUMAN;tr|B4DV51|B4DV51_HUMAN;tr|Q96QB7|Q96QB7_HUMAN;tr|Q0EFC9|Q0EFC9_HUMAN;tr|A0A087X0W0|A0A087X0W0_HUMAN	sp|P62826|RAN_HUMAN;tr|B5MDF5|B5MDF5_HUMAN;tr|J3KQE5|J3KQE5_HUMAN;tr|F5H018|F5H018_HUMAN	sp|P62826|RAN_HUMAN GTP-binding nuclear protein Ran OS=Homo sapiens OX=9606 GN=RAN PE=1 SV=3;tr|B5MDF5|B5MDF5_HUMAN GTP-binding nuclear protein Ran OS=Homo sapiens OX=9606 GN=RAN PE=1 SV=1;tr|J3KQE5|J3KQE5_HUMAN GTP-binding nuclear protein Ran (Fragment) O	1085200000	1009900000	1033500000	1040500000	1058200000	1088100000	1187800000	1212700000
sp|P62851|RS25_HUMAN	sp|P62851|RS25_HUMAN	sp|P62851|RS25_HUMAN 40S ribosomal protein S25 OS=Homo sapiens OX=9606 GN=RPS25 PE=1 SV=1	445200000	436630000	454870000	485530000	504930000	473680000	508720000	492260000
sp|P62861|RS30_HUMAN;tr|E9PR30|E9PR30_HUMAN	sp|P62861|RS30_HUMAN;tr|E9PR30|E9PR30_HUMAN	sp|P62861|RS30_HUMAN 40S ribosomal protein S30 OS=Homo sapiens OX=9606 GN=FAU PE=1 SV=1;tr|E9PR30|E9PR30_HUMAN 40S ribosomal protein S30 OS=Homo sapiens OX=9606 GN=FAU PE=1 SV=1	72167000	79346000	69953000	86713000	97314000	99327000	101980000	96345000
sp|P62906|RL10A_HUMAN;tr|Q1JQ76|Q1JQ76_HUMAN;tr|A0A024RCW3|A0A024RCW3_HUMAN	sp|P62906|RL10A_HUMAN;tr|Q1JQ76|Q1JQ76_HUMAN;tr|A0A024RCW3|A0A024RCW3_HUMAN	sp|P62906|RL10A_HUMAN 60S ribosomal protein L10a OS=Homo sapiens OX=9606 GN=RPL10A PE=1 SV=2;tr|Q1JQ76|Q1JQ76_HUMAN Ribosomal protein (Fragment) OS=Homo sapiens OX=9606 GN=RPL10A PE=2 SV=1;tr|A0A024RCW3|A0A024RCW3_HUMAN Ribosomal protein OS=Homo sapiens OX	386480000	426770000	498060000	551300000	369420000	453880000	485670000	449060000
sp|P62942|FKB1A_HUMAN;tr|Q5W0X3|Q5W0X3_HUMAN;tr|Q0VDC6|Q0VDC6_HUMAN;tr|A0A087WZM5|A0A087WZM5_HUMAN;tr|Q1JUQ5|Q1JUQ5_HUMAN;tr|Q0VDC5|Q0VDC5_HUMAN;tr|Q5VVH2|Q5VVH2_HUMAN;tr|Q1JUQ3|Q1JUQ3_HUMAN;tr|Q1JUQ4|Q1JUQ4_HUMAN;tr|A0A087WTS4|A0A087WTS4_HUMAN;tr|A0A087WV48|A0A087WV48_HUMAN	sp|P62942|FKB1A_HUMAN;tr|Q5W0X3|Q5W0X3_HUMAN;tr|Q0VDC6|Q0VDC6_HUMAN;tr|A0A087WZM5|A0A087WZM5_HUMAN	sp|P62942|FKB1A_HUMAN Peptidyl-prolyl cis-trans isomerase FKBP1A OS=Homo sapiens OX=9606 GN=FKBP1A PE=1 SV=2;tr|Q5W0X3|Q5W0X3_HUMAN Peptidylprolyl isomerase OS=Homo sapiens OX=9606 GN=FKBP1A PE=1 SV=1;tr|Q0VDC6|Q0VDC6_HUMAN Peptidylprolyl isomerase OS=Homo	388430000	361080000	400160000	415630000	450840000	437960000	466690000	423780000
sp|P63208|SKP1_HUMAN;tr|E5RJR5|E5RJR5_HUMAN;tr|E7ERH2|E7ERH2_HUMAN;tr|F8W8N3|F8W8N3_HUMAN;tr|E5RGM3|E5RGM3_HUMAN;tr|P78561|P78561_HUMAN	sp|P63208|SKP1_HUMAN;tr|E5RJR5|E5RJR5_HUMAN;tr|E7ERH2|E7ERH2_HUMAN;tr|F8W8N3|F8W8N3_HUMAN;tr|E5RGM3|E5RGM3_HUMAN	sp|P63208|SKP1_HUMAN S-phase kinase-associated protein 1 OS=Homo sapiens OX=9606 GN=SKP1 PE=1 SV=2;tr|E5RJR5|E5RJR5_HUMAN S-phase kinase-associated protein 1 OS=Homo sapiens OX=9606 GN=SKP1 PE=1 SV=1;tr|E7ERH2|E7ERH2_HUMAN S-phase kinase-associated protein	247650000	218770000	227040000	221160000	258390000	269890000	252090000	270070000
sp|P63241|IF5A1_HUMAN;tr|I3L397|I3L397_HUMAN;tr|I3L504|I3L504_HUMAN;sp|Q6IS14|IF5AL_HUMAN;tr|F8WCJ1|F8WCJ1_HUMAN;tr|C9J7B5|C9J7B5_HUMAN;tr|C9J4W5|C9J4W5_HUMAN;sp|Q9GZV4|IF5A2_HUMAN	sp|P63241|IF5A1_HUMAN;tr|I3L397|I3L397_HUMAN;tr|I3L504|I3L504_HUMAN;sp|Q6IS14|IF5AL_HUMAN	sp|P63241|IF5A1_HUMAN Eukaryotic translation initiation factor 5A-1 OS=Homo sapiens OX=9606 GN=EIF5A PE=1 SV=2;tr|I3L397|I3L397_HUMAN Eukaryotic translation initiation factor 5A (Fragment) OS=Homo sapiens OX=9606 GN=EIF5A PE=1 SV=8;tr|I3L504|I3L504_HUMAN E	2274200000	2029400000	1891200000	1521500000	2330700000	2462500000	2096800000	2092900000
sp|P63313|TYB10_HUMAN;tr|D6W5K2|D6W5K2_HUMAN	sp|P63313|TYB10_HUMAN;tr|D6W5K2|D6W5K2_HUMAN	sp|P63313|TYB10_HUMAN Thymosin beta-10 OS=Homo sapiens OX=9606 GN=TMSB10 PE=1 SV=2;tr|D6W5K2|D6W5K2_HUMAN Thymosin, beta 10, isoform CRA_a (Fragment) OS=Homo sapiens OX=9606 GN=TMSB10 PE=4 SV=1	1769800000	1662800000	2103200000	2401900000	2284000000	1805300000	1777300000	1780600000
sp|P67809|YBOX1_HUMAN;tr|Q6PKI6|Q6PKI6_HUMAN;tr|H0Y449|H0Y449_HUMAN;tr|Q7KZ24|Q7KZ24_HUMAN;tr|A0JLU4|A0JLU4_HUMAN;tr|Q2VIK8|Q2VIK8_HUMAN;tr|C9J5V9|C9J5V9_HUMAN;tr|Q15905|Q15905_HUMAN	sp|P67809|YBOX1_HUMAN;tr|Q6PKI6|Q6PKI6_HUMAN;tr|H0Y449|H0Y449_HUMAN;tr|Q7KZ24|Q7KZ24_HUMAN;tr|A0JLU4|A0JLU4_HUMAN	sp|P67809|YBOX1_HUMAN Nuclease-sensitive element-binding protein 1 OS=Homo sapiens OX=9606 GN=YBX1 PE=1 SV=3;tr|Q6PKI6|Q6PKI6_HUMAN YBX1 protein (Fragment) OS=Homo sapiens OX=9606 GN=YBX1 PE=2 SV=1;tr|H0Y449|H0Y449_HUMAN Nuclease-sensitive element-binding	1146700000	1143300000	1229300000	1169900000	1146300000	1113600000	1155400000	1317800000
sp|P68032|ACTC_HUMAN;sp|P63267|ACTH_HUMAN;tr|D2JYH4|D2JYH4_HUMAN;sp|P62736|ACTA_HUMAN;tr|B7Z6P1|B7Z6P1_HUMAN;tr|A8K3K1|A8K3K1_HUMAN;sp|P68133|ACTS_HUMAN;tr|B3KW67|B3KW67_HUMAN;tr|Q7Z7J6|Q7Z7J6_HUMAN;tr|A6NL76|A6NL76_HUMAN;tr|B4DUI8|B4DUI8_HUMAN;tr|Q13707|Q13707_HUMAN;tr|F8WB63|F8WB63_HUMAN;tr|B8ZZJ2|B8ZZJ2_HUMAN;tr|C9JFL5|C9JFL5_HUMAN;tr|F6UVQ4|F6UVQ4_HUMAN;tr|F6QUT6|F6QUT6_HUMAN;tr|B7Z6I1|B7Z6I1…	sp|P68032|ACTC_HUMAN;sp|P63267|ACTH_HUMAN;tr|D2JYH4|D2JYH4_HUMAN;sp|P62736|ACTA_HUMAN;tr|B7Z6P1|B7Z6P1_HUMAN;tr|A8K3K1|A8K3K1_HUMAN;sp|P68133|ACTS_HUMAN;tr|B3KW67|B3KW67_HUMAN;tr|Q7Z7J6|Q7Z7J6_HUMAN;tr|A6NL76|A6NL76_HUMAN;tr|B4DUI8|B4DUI8_HUMAN;tr|Q13707|Q13707_HUMAN	sp|P68032|ACTC_HUMAN Actin, alpha cardiac muscle 1 OS=Homo sapiens OX=9606 GN=ACTC1 PE=1 SV=1;sp|P63267|ACTH_HUMAN Actin, gamma-enteric smooth muscle OS=Homo sapiens OX=9606 GN=ACTG2 PE=1 SV=1;tr|D2JYH4|D2JYH4_HUMAN Actin, alpha 2, smooth muscle, aorta OS=	5613100000	5524400000	4326300000	4828000000	9582800000	6088100000	5048700000	5169900000
sp|P68366|TBA4A_HUMAN;tr|C9JEV8|C9JEV8_HUMAN;tr|C9JQ00|C9JQ00_HUMAN;tr|C9JJQ8|C9JJQ8_HUMAN;tr|C9JDL2|C9JDL2_HUMAN	sp|P68366|TBA4A_HUMAN	sp|P68366|TBA4A_HUMAN Tubulin alpha-4A chain OS=Homo sapiens OX=9606 GN=TUBA4A PE=1 SV=1	1141100000	1083800000	1031800000	968920000	1300800000	1264700000	1198300000	1204100000
sp|P68431|H31_HUMAN;tr|B4E380|B4E380_HUMAN;sp|Q16695|H31T_HUMAN;tr|K7EMV3|K7EMV3_HUMAN;tr|B4DEB1|B4DEB1_HUMAN;tr|K7ES00|K7ES00_HUMAN;tr|Q6TXQ4|Q6TXQ4_HUMAN;sp|Q6NXT2|H3C_HUMAN;tr|K7EP01|K7EP01_HUMAN	sp|P68431|H31_HUMAN;tr|B4E380|B4E380_HUMAN;sp|Q16695|H31T_HUMAN;tr|K7EMV3|K7EMV3_HUMAN;tr|B4DEB1|B4DEB1_HUMAN;tr|K7ES00|K7ES00_HUMAN;tr|Q6TXQ4|Q6TXQ4_HUMAN;sp|Q6NXT2|H3C_HUMAN	sp|P68431|H31_HUMAN Histone H3.1 OS=Homo sapiens OX=9606 GN=HIST1H3A PE=1 SV=2;tr|B4E380|B4E380_HUMAN Histone H3 OS=Homo sapiens OX=9606 PE=2 SV=1;sp|Q16695|H31T_HUMAN Histone H3.1t OS=Homo sapiens OX=9606 GN=HIST3H3 PE=1 SV=3;tr|K7EMV3|K7EMV3_HUMAN Histon	109940000	345050000	248540000	88888000	50601000	125860000	207820000	64352000
sp|P69849|NOMO3_HUMAN;tr|J3KN36|J3KN36_HUMAN;sp|Q5JPE7|NOMO2_HUMAN;sp|Q15155|NOMO1_HUMAN;tr|A0A0G2JN29|A0A0G2JN29_HUMAN;tr|A0A087X117|A0A087X117_HUMAN;tr|A0A0G2JP90|A0A0G2JP90_HUMAN;tr|A0A087WW46|A0A087WW46_HUMAN;tr|Q1LZN2|Q1LZN2_HUMAN;tr|A0A087WTD5|A0A087WTD5_HUMAN;tr|Q9H049|Q9H049_HUMAN;tr|H3BUC9|H3BUC9_HUMAN;tr|H3BPS9|H3BPS9_HUMAN	sp|P69849|NOMO3_HUMAN;tr|J3KN36|J3KN36_HUMAN;sp|Q5JPE7|NOMO2_HUMAN;sp|Q15155|NOMO1_HUMAN;tr|A0A0G2JN29|A0A0G2JN29_HUMAN;tr|A0A087X117|A0A087X117_HUMAN;tr|A0A0G2JP90|A0A0G2JP90_HUMAN;tr|A0A087WW46|A0A087WW46_HUMAN;tr|Q1LZN2|Q1LZN2_HUMAN	sp|P69849|NOMO3_HUMAN Nodal modulator 3 OS=Homo sapiens OX=9606 GN=NOMO3 PE=3 SV=2;tr|J3KN36|J3KN36_HUMAN Nodal modulator 3 OS=Homo sapiens OX=9606 GN=NOMO3 PE=1 SV=1;sp|Q5JPE7|NOMO2_HUMAN Nodal modulator 2 OS=Homo sapiens OX=9606 GN=NOMO2 PE=1 SV=1;sp|Q15	33216000	35659000	32219000	31863000	35959000	30983000	29802000	32144000
sp|P78344|IF4G2_HUMAN;tr|D3DQV9|D3DQV9_HUMAN;tr|Q59G42|Q59G42_HUMAN;tr|B4DZF2|B4DZF2_HUMAN;tr|H0Y3P2|H0Y3P2_HUMAN;tr|Q2TU89|Q2TU89_HUMAN;tr|H0YCH5|H0YCH5_HUMAN;tr|E9PKF8|E9PKF8_HUMAN;tr|H0YD77|H0YD77_HUMAN;tr|H0YE22|H0YE22_HUMAN;tr|H0YEC5|H0YEC5_HUMAN;tr|Q3LIE0|Q3LIE0_HUMAN;tr|H0YEN8|H0YEN8_HUMAN;tr|H0YDC0|H0YDC0_HUMAN;tr|H0YCF8|H0YCF8_HUMAN;tr|H0YD99|H0YD99_HUMAN;tr|H0YE44|H0YE44_HUMAN	sp|P78344|IF4G2_HUMAN;tr|D3DQV9|D3DQV9_HUMAN;tr|Q59G42|Q59G42_HUMAN;tr|B4DZF2|B4DZF2_HUMAN;tr|H0Y3P2|H0Y3P2_HUMAN;tr|Q2TU89|Q2TU89_HUMAN	sp|P78344|IF4G2_HUMAN Eukaryotic translation initiation factor 4 gamma 2 OS=Homo sapiens OX=9606 GN=EIF4G2 PE=1 SV=1;tr|D3DQV9|D3DQV9_HUMAN Eukaryotic translation initiation factor 4 gamma 2 (Fragment) OS=Homo sapiens OX=9606 GN=EIF4G2 PE=1 SV=1;tr|Q59G42|	135280000	140890000	129410000	132070000	156850000	141200000	153070000	143770000
sp|P78406|RAE1L_HUMAN;tr|E9PPG9|E9PPG9_HUMAN;tr|E9PQ57|E9PQ57_HUMAN;tr|Q5J8M4|Q5J8M4_HUMAN;tr|B0QZ36|B0QZ36_HUMAN;tr|B0QZ37|B0QZ37_HUMAN	sp|P78406|RAE1L_HUMAN;tr|E9PPG9|E9PPG9_HUMAN;tr|E9PQ57|E9PQ57_HUMAN;tr|Q5J8M4|Q5J8M4_HUMAN;tr|B0QZ36|B0QZ36_HUMAN	sp|P78406|RAE1L_HUMAN mRNA export factor OS=Homo sapiens OX=9606 GN=RAE1 PE=1 SV=1;tr|E9PPG9|E9PPG9_HUMAN mRNA export factor OS=Homo sapiens OX=9606 GN=RAE1 PE=1 SV=1;tr|E9PQ57|E9PQ57_HUMAN mRNA export factor OS=Homo sapiens OX=9606 GN=RAE1 PE=1 SV=1;tr|Q5	19017000	16040000	21757000	26370000	19768000	20692000	20453000	20713000
sp|P78527|PRKDC_HUMAN;tr|B4DL41|B4DL41_HUMAN;tr|F5GX40|F5GX40_HUMAN	sp|P78527|PRKDC_HUMAN	sp|P78527|PRKDC_HUMAN DNA-dependent protein kinase catalytic subunit OS=Homo sapiens OX=9606 GN=PRKDC PE=1 SV=3	810260000	864980000	921780000	1011800000	635100000	710200000	944070000	903740000
sp|P80723|BASP1_HUMAN;tr|U3KQP0|U3KQP0_HUMAN	sp|P80723|BASP1_HUMAN	sp|P80723|BASP1_HUMAN Brain acid soluble protein 1 OS=Homo sapiens OX=9606 GN=BASP1 PE=1 SV=2	561140000	550940000	593710000	553500000	472890000	429660000	422260000	479770000
sp|P82979|SARNP_HUMAN;tr|Q567R9|Q567R9_HUMAN;tr|F8VZQ9|F8VZQ9_HUMAN;tr|H0YHG0|H0YHG0_HUMAN;tr|A4D286|A4D286_HUMAN;tr|F8VS12|F8VS12_HUMAN	sp|P82979|SARNP_HUMAN;tr|Q567R9|Q567R9_HUMAN;tr|F8VZQ9|F8VZQ9_HUMAN;tr|H0YHG0|H0YHG0_HUMAN	sp|P82979|SARNP_HUMAN SAP domain-containing ribonucleoprotein OS=Homo sapiens OX=9606 GN=SARNP PE=1 SV=3;tr|Q567R9|Q567R9_HUMAN CIP29 protein OS=Homo sapiens OX=9606 GN=CIP29 PE=2 SV=1;tr|F8VZQ9|F8VZQ9_HUMAN SAP domain-containing ribonucleoprotein OS=Homo	113160000	95830000	104190000	109830000	110310000	99253000	102540000	118440000
sp|P83111|LACTB_HUMAN	sp|P83111|LACTB_HUMAN	sp|P83111|LACTB_HUMAN Serine beta-lactamase-like protein LACTB, mitochondrial OS=Homo sapiens OX=9606 GN=LACTB PE=1 SV=2	15392000	15341000	15773000	16003000	13801000	14160000	13809000	15763000
sp|Q00610|CLH1_HUMAN;tr|A0A087WVQ6|A0A087WVQ6_HUMAN;tr|J3KS13|J3KS13_HUMAN;tr|A0A087WX41|A0A087WX41_HUMAN;sp|P53675|CLH2_HUMAN;tr|K7EJJ5|K7EJJ5_HUMAN;tr|J3KSQ2|J3KSQ2_HUMAN;tr|J3KRF5|J3KRF5_HUMAN;tr|J3QL20|J3QL20_HUMAN;tr|A4FU99|A4FU99_HUMAN;tr|Q9H3B0|Q9H3B0_HUMAN;tr|F5H5N6|F5H5N6_HUMAN	sp|Q00610|CLH1_HUMAN;tr|A0A087WVQ6|A0A087WVQ6_HUMAN	sp|Q00610|CLH1_HUMAN Clathrin heavy chain 1 OS=Homo sapiens OX=9606 GN=CLTC PE=1 SV=5;tr|A0A087WVQ6|A0A087WVQ6_HUMAN Clathrin heavy chain OS=Homo sapiens OX=9606 GN=CLTC PE=1 SV=1	4601700000	4696000000	4365900000	4449300000	4848700000	4749800000	4714200000	4773200000
sp|Q00839|HNRPU_HUMAN;tr|B3KX72|B3KX72_HUMAN;tr|B4DLR3|B4DLR3_HUMAN;tr|A0A1W2PPS1|A0A1W2PPS1_HUMAN;tr|Q96BA7|Q96BA7_HUMAN;tr|A0A1X7SBS1|A0A1X7SBS1_HUMAN;tr|A0A1W2PP35|A0A1W2PP35_HUMAN;tr|Q5RI18|Q5RI18_HUMAN;tr|Q7Z4Q5|Q7Z4Q5_HUMAN;tr|A0A1W2PPL4|A0A1W2PPL4_HUMAN;tr|A0A1W2PPH7|A0A1W2PPH7_HUMAN;tr|A0A1W2PQL0|A0A1W2PQL0_HUMAN;tr|A0A1W2PP34|A0A1W2PP34_HUMAN;tr|A0A1W2PRZ7|A0A1W2PRZ7_HUMAN;tr|A0A1W2PQ74|…	sp|Q00839|HNRPU_HUMAN;tr|B3KX72|B3KX72_HUMAN;tr|B4DLR3|B4DLR3_HUMAN;tr|A0A1W2PPS1|A0A1W2PPS1_HUMAN;tr|Q96BA7|Q96BA7_HUMAN;tr|A0A1X7SBS1|A0A1X7SBS1_HUMAN;tr|A0A1W2PP35|A0A1W2PP35_HUMAN;tr|Q5RI18|Q5RI18_HUMAN;tr|Q7Z4Q5|Q7Z4Q5_HUMAN;tr|A0A1W2PPL4|A0A1W2PPL4_HUMAN;tr|A0A1W2PPH7|A0A1W2PPH7_HUMAN;tr|A0A1W2PQL0|A0A1W2PQL0_HUMAN;tr|A0A1W2PP34|A0A1W2PP34_HUMAN;tr|A0A1W2PRZ7|A0A1W2PRZ7_HUMAN;tr|A0A1W2PQ74|…	sp|Q00839|HNRPU_HUMAN Heterogeneous nuclear ribonucleoprotein U OS=Homo sapiens OX=9606 GN=HNRNPU PE=1 SV=6;tr|B3KX72|B3KX72_HUMAN cDNA FLJ44920 fis, clone BRAMY3011501, highly similar to Heterogeneous nuclear ribonucleoprotein U OS=Homo sapiens OX=9606 PE	2023100000	2055800000	1996100000	1985700000	1888600000	1900700000	2097200000	2057300000
sp|Q01650|LAT1_HUMAN;tr|Q96QB2|Q96QB2_HUMAN;tr|Q2MCL6|Q2MCL6_HUMAN;tr|A0A0C4DGL4|A0A0C4DGL4_HUMAN	sp|Q01650|LAT1_HUMAN;tr|Q96QB2|Q96QB2_HUMAN	sp|Q01650|LAT1_HUMAN Large neutral amino acids transporter small subunit 1 OS=Homo sapiens OX=9606 GN=SLC7A5 PE=1 SV=2;tr|Q96QB2|Q96QB2_HUMAN Sodium-independent neutral amino acid transporter LAT1 OS=Homo sapiens OX=9606 GN=lat1 PE=4 SV=1	162840000	150160000	153770000	155090000	82244000	86839000	95172000	86575000
sp|Q01813|PFKAP_HUMAN;tr|Q8WTZ9|Q8WTZ9_HUMAN;tr|O14943|O14943_HUMAN;tr|B1APP6|B1APP6_HUMAN;tr|B1APP8|B1APP8_HUMAN;tr|Q5VSR5|Q5VSR5_HUMAN;tr|Q49A78|Q49A78_HUMAN;tr|H0Y757|H0Y757_HUMAN;tr|V9GYV7|V9GYV7_HUMAN;tr|V9GY25|V9GY25_HUMAN;tr|H0Y3Y3|H0Y3Y3_HUMAN	sp|Q01813|PFKAP_HUMAN;tr|Q8WTZ9|Q8WTZ9_HUMAN;tr|O14943|O14943_HUMAN	sp|Q01813|PFKAP_HUMAN ATP-dependent 6-phosphofructokinase, platelet type OS=Homo sapiens OX=9606 GN=PFKP PE=1 SV=2;tr|Q8WTZ9|Q8WTZ9_HUMAN Similar to phosphofructokinase, platelet (Fragment) OS=Homo sapiens OX=9606 PE=2 SV=1;tr|O14943|O14943_HUMAN Phosphofr	795870000	832720000	686150000	765620000	770570000	767040000	739500000	723110000
sp|Q01970|PLCB3_HUMAN	sp|Q01970|PLCB3_HUMAN	sp|Q01970|PLCB3_HUMAN 1-phosphatidylinositol 4,5-bisphosphate phosphodiesterase beta-3 OS=Homo sapiens OX=9606 GN=PLCB3 PE=1 SV=2	24228000	27043000	33184000	33455000	19552000	25557000	24329000	26459000
sp|Q02218|ODO1_HUMAN;tr|A0A0D9SFS3|A0A0D9SFS3_HUMAN;tr|E9PCR7|E9PCR7_HUMAN;tr|E9PDF2|E9PDF2_HUMAN;tr|B4DF00|B4DF00_HUMAN;tr|B4DZ95|B4DZ95_HUMAN;tr|B4E3E9|B4E3E9_HUMAN;tr|B4DH65|B4DH65_HUMAN;tr|E9PFG7|E9PFG7_HUMAN;tr|B4DK55|B4DK55_HUMAN;tr|A2VCT3|A2VCT3_HUMAN;tr|A2VCT2|A2VCT2_HUMAN;tr|A0A140VJQ5|A0A140VJQ5_HUMAN;tr|C9J4G7|C9J4G7_HUMAN;sp|Q9ULD0|OGDHL_HUMAN;tr|Q5ISS2|Q5ISS2_MACFA;tr|A5XEI1|A5XEI1_H…	sp|Q02218|ODO1_HUMAN;tr|A0A0D9SFS3|A0A0D9SFS3_HUMAN;tr|E9PCR7|E9PCR7_HUMAN;tr|E9PDF2|E9PDF2_HUMAN;tr|B4DF00|B4DF00_HUMAN;tr|B4DZ95|B4DZ95_HUMAN;tr|B4E3E9|B4E3E9_HUMAN;tr|B4DH65|B4DH65_HUMAN;tr|E9PFG7|E9PFG7_HUMAN;tr|B4DK55|B4DK55_HUMAN;tr|A2VCT3|A2VCT3_HUMAN;tr|A2VCT2|A2VCT2_HUMAN	sp|Q02218|ODO1_HUMAN 2-oxoglutarate dehydrogenase, mitochondrial OS=Homo sapiens OX=9606 GN=OGDH PE=1 SV=3;tr|A0A0D9SFS3|A0A0D9SFS3_HUMAN 2-oxoglutarate dehydrogenase, mitochondrial OS=Homo sapiens OX=9606 GN=OGDH PE=1 SV=1;tr|E9PCR7|E9PCR7_HUMAN 2-oxoglut	118410000	116110000	119180000	131390000	108250000	114770000	105530000	112720000
sp|Q03252|LMNB2_HUMAN;tr|A0A0A7M1X5|A0A0A7M1X5_HUMAN	sp|Q03252|LMNB2_HUMAN;tr|A0A0A7M1X5|A0A0A7M1X5_HUMAN	sp|Q03252|LMNB2_HUMAN Lamin-B2 OS=Homo sapiens OX=9606 GN=LMNB2 PE=1 SV=4;tr|A0A0A7M1X5|A0A0A7M1X5_HUMAN Lamin B2, isoform CRA_b OS=Homo sapiens OX=9606 GN=LMNB2 PE=2 SV=1	282710000	261940000	269980000	285630000	273440000	270930000	264660000	280800000
sp|Q03405|UPAR_HUMAN;tr|M0R1I2|M0R1I2_HUMAN;tr|M0R0H5|M0R0H5_HUMAN;tr|M0QYR6|M0QYR6_HUMAN;tr|Q9UPI5|Q9UPI5_HUMAN;tr|M0R0Y4|M0R0Y4_HUMAN;tr|M0QYS6|M0QYS6_HUMAN;tr|M0R2E9|M0R2E9_HUMAN;tr|M0QX27|M0QX27_HUMAN;tr|M0R383|M0R383_HUMAN	sp|Q03405|UPAR_HUMAN;tr|M0R1I2|M0R1I2_HUMAN;tr|M0R0H5|M0R0H5_HUMAN;tr|M0QYR6|M0QYR6_HUMAN;tr|Q9UPI5|Q9UPI5_HUMAN;tr|M0R0Y4|M0R0Y4_HUMAN	sp|Q03405|UPAR_HUMAN Urokinase plasminogen activator surface receptor OS=Homo sapiens OX=9606 GN=PLAUR PE=1 SV=1;tr|M0R1I2|M0R1I2_HUMAN Urokinase plasminogen activator surface receptor OS=Homo sapiens OX=9606 GN=PLAUR PE=1 SV=1;tr|M0R0H5|M0R0H5_HUMAN Uroki	45140000	45243000	40501000	41672000	54734000	52036000	52095000	53151000
sp|Q04446|GLGB_HUMAN;tr|E9PGM4|E9PGM4_HUMAN	sp|Q04446|GLGB_HUMAN;tr|E9PGM4|E9PGM4_HUMAN	sp|Q04446|GLGB_HUMAN 1,4-alpha-glucan-branching enzyme OS=Homo sapiens OX=9606 GN=GBE1 PE=1 SV=3;tr|E9PGM4|E9PGM4_HUMAN 1,4-alpha-glucan-branching enzyme OS=Homo sapiens OX=9606 GN=GBE1 PE=1 SV=1	220960000	201760000	182330000	209040000	242100000	237060000	203310000	226770000
sp|Q05048|CSTF1_HUMAN;tr|B4DDG3|B4DDG3_HUMAN;tr|A0A0A0MSZ9|A0A0A0MSZ9_HUMAN;tr|A3KFI9|A3KFI9_HUMAN	sp|Q05048|CSTF1_HUMAN;tr|B4DDG3|B4DDG3_HUMAN;tr|A0A0A0MSZ9|A0A0A0MSZ9_HUMAN	sp|Q05048|CSTF1_HUMAN Cleavage stimulation factor subunit 1 OS=Homo sapiens OX=9606 GN=CSTF1 PE=1 SV=1;tr|B4DDG3|B4DDG3_HUMAN cDNA FLJ51688, highly similar to Cleavage stimulation factor 50 kDa subunit OS=Homo sapiens OX=9606 PE=2 SV=1;tr|A0A0A0MSZ9|A0A0A0	80629000	83307000	74463000	76426000	79547000	72384000	68510000	69346000
sp|Q06124|PTN11_HUMAN;tr|B3GUD5|B3GUD5_HUMAN;tr|A0A1W2PPU4|A0A1W2PPU4_HUMAN;tr|A0A0U1RRI0|A0A0U1RRI0_HUMAN;tr|B3GUD4|B3GUD4_HUMAN;tr|B3GUD3|B3GUD3_HUMAN;tr|H0YF12|H0YF12_HUMAN	sp|Q06124|PTN11_HUMAN	sp|Q06124|PTN11_HUMAN Tyrosine-protein phosphatase non-receptor type 11 OS=Homo sapiens OX=9606 GN=PTPN11 PE=1 SV=2	79561000	77508000	72997000	82437000	90194000	73027000	74676000	84924000
sp|Q06210|GFPT1_HUMAN	sp|Q06210|GFPT1_HUMAN	sp|Q06210|GFPT1_HUMAN Glutamine--fructose-6-phosphate aminotransferase [isomerizing] 1 OS=Homo sapiens OX=9606 GN=GFPT1 PE=1 SV=3	229070000	239670000	247050000	238640000	212170000	207060000	207980000	208150000
sp|Q06830|PRDX1_HUMAN;tr|A0A0A0MSI0|A0A0A0MSI0_HUMAN;tr|Q5IST6|Q5IST6_MACFA;tr|B2R4P2|B2R4P2_HUMAN;tr|A0A0A0MRQ5|A0A0A0MRQ5_HUMAN	sp|Q06830|PRDX1_HUMAN;tr|A0A0A0MSI0|A0A0A0MSI0_HUMAN;tr|Q5IST6|Q5IST6_MACFA;tr|B2R4P2|B2R4P2_HUMAN	sp|Q06830|PRDX1_HUMAN Peroxiredoxin-1 OS=Homo sapiens OX=9606 GN=PRDX1 PE=1 SV=1;tr|A0A0A0MSI0|A0A0A0MSI0_HUMAN Peroxiredoxin-1 (Fragment) OS=Homo sapiens OX=9606 GN=PRDX1 PE=1 SV=1;tr|Q5IST6|Q5IST6_MACFA Peroxiredoxin 1 (Fragment) OS=Macaca fascicularis O	2897700000	2781100000	2734800000	2918300000	2931800000	2892500000	2844800000	2939100000
sp|Q07021|C1QBP_HUMAN;tr|I3L3Q7|I3L3Q7_HUMAN;tr|I3L3B0|I3L3B0_HUMAN;tr|A8K651|A8K651_HUMAN	sp|Q07021|C1QBP_HUMAN;tr|I3L3Q7|I3L3Q7_HUMAN;tr|I3L3B0|I3L3B0_HUMAN;tr|A8K651|A8K651_HUMAN	sp|Q07021|C1QBP_HUMAN Complement component 1 Q subcomponent-binding protein, mitochondrial OS=Homo sapiens OX=9606 GN=C1QBP PE=1 SV=1;tr|I3L3Q7|I3L3Q7_HUMAN Complement component 1 Q subcomponent-binding protein, mitochondrial (Fragment) OS=Homo sapiens OX=	1045100000	1067600000	1178700000	1113200000	805930000	936750000	1106000000	1115000000
sp|Q07666|KHDR1_HUMAN;tr|B4DDX2|B4DDX2_HUMAN;tr|B4E043|B4E043_HUMAN;tr|B2R7B5|B2R7B5_HUMAN;tr|B3KTS3|B3KTS3_HUMAN;sp|Q5VWX1|KHDR2_HUMAN	sp|Q07666|KHDR1_HUMAN;tr|B4DDX2|B4DDX2_HUMAN;tr|B4E043|B4E043_HUMAN;tr|B2R7B5|B2R7B5_HUMAN	sp|Q07666|KHDR1_HUMAN KH domain-containing, RNA-binding, signal transduction-associated protein 1 OS=Homo sapiens OX=9606 GN=KHDRBS1 PE=1 SV=1;tr|B4DDX2|B4DDX2_HUMAN cDNA FLJ54590, highly similar to KH domain-containing, RNA-binding, signaltransduction-ass	271550000	266400000	299040000	307800000	259480000	251170000	256970000	282560000
sp|Q07812|BAX_HUMAN;tr|K4JQN1|K4JQN1_HUMAN;tr|A0A0C4MW46|A0A0C4MW46_HUMAN;tr|A0A0C4MWS3|A0A0C4MWS3_HUMAN;tr|A0A0C4MVT1|A0A0C4MVT1_HUMAN;tr|Q5ZPJ1|Q5ZPJ1_HUMAN;tr|I6LPK7|I6LPK7_HUMAN	sp|Q07812|BAX_HUMAN;tr|K4JQN1|K4JQN1_HUMAN;tr|A0A0C4MW46|A0A0C4MW46_HUMAN;tr|A0A0C4MWS3|A0A0C4MWS3_HUMAN;tr|A0A0C4MVT1|A0A0C4MVT1_HUMAN	sp|Q07812|BAX_HUMAN Apoptosis regulator BAX OS=Homo sapiens OX=9606 GN=BAX PE=1 SV=1;tr|K4JQN1|K4JQN1_HUMAN Apoptosis regulator BAX OS=Homo sapiens OX=9606 GN=BAX PE=1 SV=1;tr|A0A0C4MW46|A0A0C4MW46_HUMAN Bax protein OS=Homo sapiens OX=9606 GN=Bax PE=2 SV=1	36726000	33461000	34299000	44240000	36757000	31909000	29356000	32087000
sp|Q07955|SRSF1_HUMAN;tr|J3KTL2|J3KTL2_HUMAN;tr|Q59FA2|Q59FA2_HUMAN;tr|A8K1L8|A8K1L8_HUMAN;tr|J3KSR8|J3KSR8_HUMAN;tr|J3QQV5|J3QQV5_HUMAN;tr|J3KSW7|J3KSW7_HUMAN;tr|A0A2I7N9Y9|A0A2I7N9Y9_HUMAN;tr|B7Z570|B7Z570_HUMAN	sp|Q07955|SRSF1_HUMAN;tr|J3KTL2|J3KTL2_HUMAN;tr|Q59FA2|Q59FA2_HUMAN;tr|A8K1L8|A8K1L8_HUMAN	sp|Q07955|SRSF1_HUMAN Serine/arginine-rich splicing factor 1 OS=Homo sapiens OX=9606 GN=SRSF1 PE=1 SV=2;tr|J3KTL2|J3KTL2_HUMAN Serine/arginine-rich-splicing factor 1 OS=Homo sapiens OX=9606 GN=SRSF1 PE=1 SV=1;tr|Q59FA2|Q59FA2_HUMAN Splicing factor, arginin	361840000	342240000	342770000	359160000	382070000	363850000	355700000	374080000
sp|Q07960|RHG01_HUMAN;tr|B4DPZ4|B4DPZ4_HUMAN;tr|H0YE29|H0YE29_HUMAN;tr|E9PNR6|E9PNR6_HUMAN;tr|O15376|O15376_HUMAN	sp|Q07960|RHG01_HUMAN;tr|B4DPZ4|B4DPZ4_HUMAN;tr|H0YE29|H0YE29_HUMAN	sp|Q07960|RHG01_HUMAN Rho GTPase-activating protein 1 OS=Homo sapiens OX=9606 GN=ARHGAP1 PE=1 SV=1;tr|B4DPZ4|B4DPZ4_HUMAN cDNA FLJ60782, highly similar to Rho-GTPase-activating protein 1 OS=Homo sapiens OX=9606 PE=2 SV=1;tr|H0YE29|H0YE29_HUMAN Rho GTPase-a	78439000	85133000	82572000	78781000	92479000	84614000	87875000	82119000
sp|Q08211|DHX9_HUMAN;tr|Q58F26|Q58F26_HUMAN;tr|Q6PJK6|Q6PJK6_HUMAN;tr|B3KU66|B3KU66_HUMAN	sp|Q08211|DHX9_HUMAN;tr|Q58F26|Q58F26_HUMAN;tr|Q6PJK6|Q6PJK6_HUMAN	sp|Q08211|DHX9_HUMAN ATP-dependent RNA helicase A OS=Homo sapiens OX=9606 GN=DHX9 PE=1 SV=4;tr|Q58F26|Q58F26_HUMAN DHX9 protein (Fragment) OS=Homo sapiens OX=9606 GN=DHX9 PE=2 SV=1;tr|Q6PJK6|Q6PJK6_HUMAN DHX9 protein (Fragment) OS=Homo sapiens OX=9606 GN=D	913310000	936510000	961860000	977460000	911170000	855640000	956900000	943280000
sp|Q08257|QOR_HUMAN;tr|C9JH92|C9JH92_HUMAN;tr|A6NP24|A6NP24_HUMAN	sp|Q08257|QOR_HUMAN;tr|C9JH92|C9JH92_HUMAN;tr|A6NP24|A6NP24_HUMAN	sp|Q08257|QOR_HUMAN Quinone oxidoreductase OS=Homo sapiens OX=9606 GN=CRYZ PE=1 SV=1;tr|C9JH92|C9JH92_HUMAN Quinone oxidoreductase (Fragment) OS=Homo sapiens OX=9606 GN=CRYZ PE=1 SV=1;tr|A6NP24|A6NP24_HUMAN Quinone oxidoreductase (Fragment) OS=Homo sapiens	27179000	25857000	29189000	31254000	21995000	26012000	22814000	25651000
sp|Q08J23|NSUN2_HUMAN;tr|A0A140T9Y7|A0A140T9Y7_HUMAN	sp|Q08J23|NSUN2_HUMAN	sp|Q08J23|NSUN2_HUMAN tRNA (cytosine(34)-C(5))-methyltransferase OS=Homo sapiens OX=9606 GN=NSUN2 PE=1 SV=2	88626000	83922000	91547000	86283000	112260000	102180000	98717000	101590000
sp|Q09028|RBBP4_HUMAN;tr|H0YF10|H0YF10_HUMAN;tr|E9PNS6|E9PNS6_HUMAN;tr|H0YCT5|H0YCT5_HUMAN;tr|H0YDK2|H0YDK2_HUMAN;tr|H0YEU5|H0YEU5_HUMAN;tr|B4DRT0|B4DRT0_HUMAN;tr|E9PNS2|E9PNS2_HUMAN;tr|C9JPP3|C9JPP3_HUMAN;tr|E9PIC4|E9PIC4_HUMAN;tr|C9JAJ9|C9JAJ9_HUMAN;tr|E9PND5|E9PND5_HUMAN	sp|Q09028|RBBP4_HUMAN	sp|Q09028|RBBP4_HUMAN Histone-binding protein RBBP4 OS=Homo sapiens OX=9606 GN=RBBP4 PE=1 SV=3	141840000	150480000	146090000	141990000	167730000	172130000	179020000	163720000
sp|Q09666|AHNK_HUMAN;tr|Q6ZQN2|Q6ZQN2_HUMAN;tr|B4DTV0|B4DTV0_HUMAN;tr|Q8N274|Q8N274_HUMAN;tr|Q13727|Q13727_HUMAN;tr|E9PKR9|E9PKR9_HUMAN;tr|E9PLK4|E9PLK4_HUMAN;tr|E9PJZ0|E9PJZ0_HUMAN;tr|E9PJC6|E9PJC6_HUMAN;tr|Q96EC4|Q96EC4_HUMAN;tr|E9PQE3|E9PQE3_HUMAN	sp|Q09666|AHNK_HUMAN	sp|Q09666|AHNK_HUMAN Neuroblast differentiation-associated protein AHNAK OS=Homo sapiens OX=9606 GN=AHNAK PE=1 SV=2	11029000000	10114000000	9473200000	9876300000	9387200000	9585700000	8836900000	9023700000
sp|Q10567|AP1B1_HUMAN;tr|C9J1E7|C9J1E7_HUMAN;tr|Q7Z3M8|Q7Z3M8_HUMAN	sp|Q10567|AP1B1_HUMAN;tr|C9J1E7|C9J1E7_HUMAN	sp|Q10567|AP1B1_HUMAN AP-1 complex subunit beta-1 OS=Homo sapiens OX=9606 GN=AP1B1 PE=1 SV=2;tr|C9J1E7|C9J1E7_HUMAN AP-1 complex subunit beta-1 (Fragment) OS=Homo sapiens OX=9606 GN=AP1B1 PE=1 SV=1	60132000	52696000	55579000	56479000	54687000	52598000	53790000	49825000
sp|Q12769|NU160_HUMAN;tr|G3V198|G3V198_HUMAN;tr|E9PR16|E9PR16_HUMAN	sp|Q12769|NU160_HUMAN;tr|G3V198|G3V198_HUMAN;tr|E9PR16|E9PR16_HUMAN	sp|Q12769|NU160_HUMAN Nuclear pore complex protein Nup160 OS=Homo sapiens OX=9606 GN=NUP160 PE=1 SV=3;tr|G3V198|G3V198_HUMAN Nuclear pore complex protein Nup160 (Fragment) OS=Homo sapiens OX=9606 GN=NUP160 PE=1 SV=2;tr|E9PR16|E9PR16_HUMAN Nuclear pore comp	30246000	38546000	32184000	34585000	28508000	30828000	35144000	36196000
sp|Q12788|TBL3_HUMAN;tr|J3KNP2|J3KNP2_HUMAN;tr|A0JLS5|A0JLS5_HUMAN;tr|A0A087WYP7|A0A087WYP7_HUMAN	sp|Q12788|TBL3_HUMAN;tr|J3KNP2|J3KNP2_HUMAN;tr|A0JLS5|A0JLS5_HUMAN	sp|Q12788|TBL3_HUMAN Transducin beta-like protein 3 OS=Homo sapiens OX=9606 GN=TBL3 PE=1 SV=2;tr|J3KNP2|J3KNP2_HUMAN Transducin beta-like protein 3 (Fragment) OS=Homo sapiens OX=9606 GN=TBL3 PE=1 SV=1;tr|A0JLS5|A0JLS5_HUMAN TBL3 protein (Fragment) OS=Homo	45048000	52038000	36692000	41063000	64993000	59234000	68834000	57458000
sp|Q12792|TWF1_HUMAN;tr|F8VS81|F8VS81_HUMAN;tr|F8VRG3|F8VRG3_HUMAN	sp|Q12792|TWF1_HUMAN;tr|F8VS81|F8VS81_HUMAN	sp|Q12792|TWF1_HUMAN Twinfilin-1 OS=Homo sapiens OX=9606 GN=TWF1 PE=1 SV=3;tr|F8VS81|F8VS81_HUMAN Twinfilin-1 (Fragment) OS=Homo sapiens OX=9606 GN=TWF1 PE=1 SV=1	55912000	49188000	48366000	51591000	51234000	53507000	61074000	63385000
sp|Q12797|ASPH_HUMAN;tr|B8Y0L3|B8Y0L3_HUMAN;tr|Q6PJH4|Q6PJH4_HUMAN;tr|E5RG56|E5RG56_HUMAN;tr|B3GQE5|B3GQE5_HUMAN;tr|E5RHJ2|E5RHJ2_HUMAN;tr|E5RG29|E5RG29_HUMAN;tr|B7ZM96|B7ZM96_HUMAN;tr|B4DQ07|B4DQ07_HUMAN;tr|A8K721|A8K721_HUMAN;tr|E5RHK2|E5RHK2_HUMAN;tr|G3XAN5|G3XAN5_HUMAN;tr|A0A087WUJ2|A0A087WUJ2_HUMAN;tr|A0A087WW51|A0A087WW51_HUMAN	sp|Q12797|ASPH_HUMAN;tr|B8Y0L3|B8Y0L3_HUMAN	sp|Q12797|ASPH_HUMAN Aspartyl/asparaginyl beta-hydroxylase OS=Homo sapiens OX=9606 GN=ASPH PE=1 SV=3;tr|B8Y0L3|B8Y0L3_HUMAN Aspartate beta-hydroxylase (Fragment) OS=Homo sapiens OX=9606 GN=ASPH PE=2 SV=1	117800000	103630000	113770000	105030000	81710000	87595000	90735000	92055000
sp|Q12904|AIMP1_HUMAN;tr|B4DNK3|B4DNK3_HUMAN;tr|D6R937|D6R937_HUMAN	sp|Q12904|AIMP1_HUMAN;tr|B4DNK3|B4DNK3_HUMAN	sp|Q12904|AIMP1_HUMAN Aminoacyl tRNA synthase complex-interacting multifunctional protein 1 OS=Homo sapiens OX=9606 GN=AIMP1 PE=1 SV=2;tr|B4DNK3|B4DNK3_HUMAN cDNA FLJ52127, highly similar to Multisynthetase complex auxiliary component p43 OS=Homo sapiens O	271750000	244330000	239390000	238350000	225620000	251240000	238080000	248880000
sp|Q12996|CSTF3_HUMAN;tr|B4DFQ5|B4DFQ5_HUMAN;tr|B4DMA4|B4DMA4_HUMAN;tr|E9PJ06|E9PJ06_HUMAN;tr|E9PLP8|E9PLP8_HUMAN;tr|H0YE74|H0YE74_HUMAN	sp|Q12996|CSTF3_HUMAN;tr|B4DFQ5|B4DFQ5_HUMAN;tr|B4DMA4|B4DMA4_HUMAN	sp|Q12996|CSTF3_HUMAN Cleavage stimulation factor subunit 3 OS=Homo sapiens OX=9606 GN=CSTF3 PE=1 SV=1;tr|B4DFQ5|B4DFQ5_HUMAN cDNA FLJ58134, highly similar to Cleavage stimulation factor 77 kDa subunit OS=Homo sapiens OX=9606 PE=2 SV=1;tr|B4DMA4|B4DMA4_HUM	59902000	53204000	62513000	63443000	54945000	53211000	62424000	50916000
sp|Q13011|ECH1_HUMAN;tr|M0R248|M0R248_HUMAN;tr|M0QZW4|M0QZW4_HUMAN	sp|Q13011|ECH1_HUMAN;tr|M0R248|M0R248_HUMAN	sp|Q13011|ECH1_HUMAN Delta(3,5)-Delta(2,4)-dienoyl-CoA isomerase, mitochondrial OS=Homo sapiens OX=9606 GN=ECH1 PE=1 SV=2;tr|M0R248|M0R248_HUMAN Delta(3,5)-Delta(2,4)-dienoyl-CoA isomerase, mitochondrial (Fragment) OS=Homo sapiens OX=9606 GN=ECH1 PE=1 SV=1	61770000	58603000	51102000	53530000	39595000	48553000	38187000	50687000
sp|Q13045|FLII_HUMAN;tr|B4DIX0|B4DIX0_HUMAN;tr|Q59H95|Q59H95_HUMAN;tr|J3KS54|J3KS54_HUMAN;tr|J3QQQ2|J3QQQ2_HUMAN;tr|B4DNA8|B4DNA8_HUMAN;tr|K7EQZ7|K7EQZ7_HUMAN;tr|J3QLR6|J3QLR6_HUMAN;tr|J3KS39|J3KS39_HUMAN;tr|J3QQU5|J3QQU5_HUMAN;tr|K7EP37|K7EP37_HUMAN;tr|K7EP27|K7EP27_HUMAN	sp|Q13045|FLII_HUMAN;tr|B4DIX0|B4DIX0_HUMAN;tr|Q59H95|Q59H95_HUMAN	sp|Q13045|FLII_HUMAN Protein flightless-1 homolog OS=Homo sapiens OX=9606 GN=FLII PE=1 SV=2;tr|B4DIX0|B4DIX0_HUMAN cDNA FLJ50778, highly similar to Protein flightless-1 homolog OS=Homo sapiens OX=9606 PE=2 SV=1;tr|Q59H95|Q59H95_HUMAN Flightless I homolog v	58199000	59568000	56390000	62060000	62443000	51600000	62370000	60457000
sp|Q13131|AAPK1_HUMAN;tr|Q96E92|Q96E92_HUMAN;tr|B2RA25|B2RA25_HUMAN;tr|A0MZF5|A0MZF5_HUMAN;tr|A0A087WXX9|A0A087WXX9_HUMAN;sp|P54646|AAPK2_HUMAN	sp|Q13131|AAPK1_HUMAN	sp|Q13131|AAPK1_HUMAN 5-AMP-activated protein kinase catalytic subunit alpha-1 OS=Homo sapiens OX=9606 GN=PRKAA1 PE=1 SV=4	14902000	15831000	20894000	19898000	16541000	15246000	14992000	14683000
sp|Q13144|EI2BE_HUMAN;tr|Q59HD8|Q59HD8_HUMAN;tr|C9JRD9|C9JRD9_HUMAN;tr|H7C2X0|H7C2X0_HUMAN	sp|Q13144|EI2BE_HUMAN	sp|Q13144|EI2BE_HUMAN Translation initiation factor eIF-2B subunit epsilon OS=Homo sapiens OX=9606 GN=EIF2B5 PE=1 SV=3	50880000	43943000	43805000	42532000	39749000	39370000	47648000	42181000
sp|Q13151|ROA0_HUMAN	sp|Q13151|ROA0_HUMAN	sp|Q13151|ROA0_HUMAN Heterogeneous nuclear ribonucleoprotein A0 OS=Homo sapiens OX=9606 GN=HNRNPA0 PE=1 SV=1	171960000	176620000	186090000	208810000	245430000	226030000	238140000	241590000
sp|Q13177|PAK2_HUMAN;tr|A8K5M4|A8K5M4_HUMAN;tr|Q9Y6B5|Q9Y6B5_HUMAN;tr|H7C1X3|H7C1X3_HUMAN;tr|E9PM17|E9PM17_HUMAN;tr|B7Z3K0|B7Z3K0_HUMAN;tr|B3KNX7|B3KNX7_HUMAN;tr|A0A087X294|A0A087X294_HUMAN;tr|A0A024R5P0|A0A024R5P0_HUMAN;sp|Q13153|PAK1_HUMAN;tr|A8KAN3|A8KAN3_HUMAN;sp|O75914|PAK3_HUMAN;tr|H0YCG5|H0YCG5_HUMAN;tr|B7Z302|B7Z302_HUMAN;tr|B2RCU6|B2RCU6_HUMAN;tr|H9XFB4|H9XFB4_HUMAN;tr|B1AKS5|B1AKS5_HUMA…	sp|Q13177|PAK2_HUMAN;tr|A8K5M4|A8K5M4_HUMAN	sp|Q13177|PAK2_HUMAN Serine/threonine-protein kinase PAK 2 OS=Homo sapiens OX=9606 GN=PAK2 PE=1 SV=3;tr|A8K5M4|A8K5M4_HUMAN Non-specific serine/threonine protein kinase OS=Homo sapiens OX=9606 PE=2 SV=1	288460000	245180000	261870000	266830000	331510000	284920000	262440000	272120000
sp|Q13200|PSMD2_HUMAN;tr|Q59EG8|Q59EG8_HUMAN;tr|B4DM22|B4DM22_HUMAN;tr|Q9NSM5|Q9NSM5_HUMAN;tr|Q13041|Q13041_HUMAN;tr|H7C1H2|H7C1H2_HUMAN;tr|C9JPC0|C9JPC0_HUMAN;tr|H7C2Q3|H7C2Q3_HUMAN;tr|F8WBS8|F8WBS8_HUMAN	sp|Q13200|PSMD2_HUMAN;tr|Q59EG8|Q59EG8_HUMAN;tr|B4DM22|B4DM22_HUMAN;tr|Q9NSM5|Q9NSM5_HUMAN;tr|Q13041|Q13041_HUMAN	sp|Q13200|PSMD2_HUMAN 26S proteasome non-ATPase regulatory subunit 2 OS=Homo sapiens OX=9606 GN=PSMD2 PE=1 SV=3;tr|Q59EG8|Q59EG8_HUMAN Proteasome 26S non-ATPase subunit 2 variant (Fragment) OS=Homo sapiens OX=9606 PE=2 SV=1;tr|B4DM22|B4DM22_HUMAN 26S prote	1212000000	1156900000	1088700000	1131700000	1226400000	1228300000	1178200000	1219600000
sp|Q13263|TIF1B_HUMAN;tr|B2R8R5|B2R8R5_HUMAN;tr|M0R0K9|M0R0K9_HUMAN;tr|M0R2I3|M0R2I3_HUMAN;tr|M0R3C0|M0R3C0_HUMAN	sp|Q13263|TIF1B_HUMAN;tr|B2R8R5|B2R8R5_HUMAN;tr|M0R0K9|M0R0K9_HUMAN	sp|Q13263|TIF1B_HUMAN Transcription intermediary factor 1-beta OS=Homo sapiens OX=9606 GN=TRIM28 PE=1 SV=5;tr|B2R8R5|B2R8R5_HUMAN cDNA, FLJ94025, highly similar to Homo sapiens tripartite motif-containing 28 (TRIM28), mRNA OS=Homo sapiens OX=9606 PE=2 SV=1	683710000	639260000	618760000	689310000	768520000	764410000	724360000	763190000
sp|Q13308|PTK7_HUMAN;tr|Q59FV9|Q59FV9_HUMAN;tr|F8WDG7|F8WDG7_HUMAN;tr|Q9NSQ6|Q9NSQ6_HUMAN;tr|H0Y8F1|H0Y8F1_HUMAN;tr|B7Z471|B7Z471_HUMAN;tr|Q86X91|Q86X91_HUMAN;tr|C9J9E8|C9J9E8_HUMAN;tr|C9JQR6|C9JQR6_HUMAN;tr|H7C5L0|H7C5L0_HUMAN;tr|B3KP36|B3KP36_HUMAN	sp|Q13308|PTK7_HUMAN;tr|Q59FV9|Q59FV9_HUMAN	sp|Q13308|PTK7_HUMAN Inactive tyrosine-protein kinase 7 OS=Homo sapiens OX=9606 GN=PTK7 PE=1 SV=2;tr|Q59FV9|Q59FV9_HUMAN PTK7 protein tyrosine kinase 7 isoform a variant (Fragment) OS=Homo sapiens OX=9606 PE=2 SV=1	50286000	44388000	56394000	49309000	55923000	48675000	47861000	47539000
sp|Q13404|UB2V1_HUMAN;tr|I3L0A0|I3L0A0_HUMAN;tr|G3V2F7|G3V2F7_HUMAN;tr|A0A0A0MSL3|A0A0A0MSL3_HUMAN;tr|E5RIF1|E5RIF1_HUMAN;tr|D6RG00|D6RG00_HUMAN;tr|H0YBX6|H0YBX6_HUMAN	sp|Q13404|UB2V1_HUMAN;tr|I3L0A0|I3L0A0_HUMAN;tr|G3V2F7|G3V2F7_HUMAN;tr|A0A0A0MSL3|A0A0A0MSL3_HUMAN	sp|Q13404|UB2V1_HUMAN Ubiquitin-conjugating enzyme E2 variant 1 OS=Homo sapiens OX=9606 GN=UBE2V1 PE=1 SV=2;tr|I3L0A0|I3L0A0_HUMAN HCG2044781 OS=Homo sapiens OX=9606 GN=TMEM189-UBE2V1 PE=4 SV=1;tr|G3V2F7|G3V2F7_HUMAN Ubiquitin-conjugating enzyme E2 variant	236710000	211970000	234610000	225650000	218700000	217100000	218130000	243800000
sp|Q13428|TCOF_HUMAN;tr|J3KQ96|J3KQ96_HUMAN;tr|E7ETY2|E7ETY2_HUMAN;tr|B4DRA2|B4DRA2_HUMAN;tr|Q59FZ2|Q59FZ2_HUMAN;tr|Q9UFD4|Q9UFD4_HUMAN;tr|H0YA99|H0YA99_HUMAN;tr|B4DLB1|B4DLB1_HUMAN	sp|Q13428|TCOF_HUMAN;tr|J3KQ96|J3KQ96_HUMAN;tr|E7ETY2|E7ETY2_HUMAN;tr|B4DRA2|B4DRA2_HUMAN	sp|Q13428|TCOF_HUMAN Treacle protein OS=Homo sapiens OX=9606 GN=TCOF1 PE=1 SV=3;tr|J3KQ96|J3KQ96_HUMAN Treacle protein (Fragment) OS=Homo sapiens OX=9606 GN=TCOF1 PE=1 SV=1;tr|E7ETY2|E7ETY2_HUMAN Treacle protein OS=Homo sapiens OX=9606 GN=TCOF1 PE=1 SV=1;t	57405000	53027000	65845000	67509000	52553000	54510000	56406000	60199000
sp|Q13435|SF3B2_HUMAN;tr|E9PPJ0|E9PPJ0_HUMAN;tr|Q7Z3K9|Q7Z3K9_HUMAN;tr|E9PJ04|E9PJ04_HUMAN;tr|H0YCG1|H0YCG1_HUMAN;tr|E9PJT3|E9PJT3_HUMAN;tr|H0YEX5|H0YEX5_HUMAN;tr|E9PIL8|E9PIL8_HUMAN	sp|Q13435|SF3B2_HUMAN;tr|E9PPJ0|E9PPJ0_HUMAN;tr|Q7Z3K9|Q7Z3K9_HUMAN;tr|E9PJ04|E9PJ04_HUMAN	sp|Q13435|SF3B2_HUMAN Splicing factor 3B subunit 2 OS=Homo sapiens OX=9606 GN=SF3B2 PE=1 SV=2;tr|E9PPJ0|E9PPJ0_HUMAN Splicing factor 3B subunit 2 OS=Homo sapiens OX=9606 GN=SF3B2 PE=1 SV=1;tr|Q7Z3K9|Q7Z3K9_HUMAN Uncharacterized protein DKFZp781L0540 (Fragm	332470000	315340000	312920000	324630000	326550000	315650000	291090000	336810000
sp|Q13442|HAP28_HUMAN;tr|F8WBW6|F8WBW6_HUMAN	sp|Q13442|HAP28_HUMAN	sp|Q13442|HAP28_HUMAN 28 kDa heat- and acid-stable phosphoprotein OS=Homo sapiens OX=9606 GN=PDAP1 PE=1 SV=1	93230000	79886000	119610000	147060000	92866000	97381000	76931000	119270000
sp|Q13445|TMED1_HUMAN;tr|K7EIN4|K7EIN4_HUMAN;tr|K7EQ63|K7EQ63_HUMAN	sp|Q13445|TMED1_HUMAN;tr|K7EIN4|K7EIN4_HUMAN	sp|Q13445|TMED1_HUMAN Transmembrane emp24 domain-containing protein 1 OS=Homo sapiens OX=9606 GN=TMED1 PE=1 SV=1;tr|K7EIN4|K7EIN4_HUMAN Transmembrane emp24 domain-containing protein 1 OS=Homo sapiens OX=9606 GN=TMED1 PE=1 SV=1	19783000	18392000	17105000	18532000	18898000	17934000	17973000	15809000
sp|Q13501|SQSTM_HUMAN;tr|E7EMC7|E7EMC7_HUMAN;tr|E3WH17|E3WH17_HUMAN;tr|E9PFW8|E9PFW8_HUMAN;tr|B4E3V2|B4E3V2_HUMAN;tr|E3W990|E3W990_HUMAN;tr|B4DE82|B4DE82_HUMAN;tr|C9JRJ8|C9JRJ8_HUMAN;tr|D6RBF1|D6RBF1_HUMAN;tr|C9J6J8|C9J6J8_HUMAN;tr|Q13502|Q13502_HUMAN	sp|Q13501|SQSTM_HUMAN;tr|E7EMC7|E7EMC7_HUMAN;tr|E3WH17|E3WH17_HUMAN;tr|E9PFW8|E9PFW8_HUMAN;tr|B4E3V2|B4E3V2_HUMAN	sp|Q13501|SQSTM_HUMAN Sequestosome-1 OS=Homo sapiens OX=9606 GN=SQSTM1 PE=1 SV=1;tr|E7EMC7|E7EMC7_HUMAN Sequestosome-1 OS=Homo sapiens OX=9606 GN=SQSTM1 PE=1 SV=1;tr|E3WH17|E3WH17_HUMAN Tyrosine-protein kinase receptor OS=Homo sapiens OX=9606 GN=SQSTM1-ALK	76854000	71895000	67992000	69157000	112380000	124230000	103930000	110790000
sp|Q13509|TBB3_HUMAN;tr|Q9BV28|Q9BV28_HUMAN;tr|Q53G92|Q53G92_HUMAN;tr|B2RBD5|B2RBD5_HUMAN;tr|A0A0B4J269|A0A0B4J269_HUMAN;tr|Q3ZCR3|Q3ZCR3_HUMAN;tr|G3V2A3|G3V2A3_HUMAN;tr|G3V5W4|G3V5W4_HUMAN;tr|G3V2R8|G3V2R8_HUMAN;tr|G3V3R4|G3V3R4_HUMAN;tr|G3V2N6|G3V2N6_HUMAN;tr|G3V3J6|G3V3J6_HUMAN;tr|G3V3W7|G3V3W7_HUMAN	sp|Q13509|TBB3_HUMAN;tr|Q9BV28|Q9BV28_HUMAN;tr|Q53G92|Q53G92_HUMAN;tr|B2RBD5|B2RBD5_HUMAN;tr|A0A0B4J269|A0A0B4J269_HUMAN;tr|Q3ZCR3|Q3ZCR3_HUMAN	sp|Q13509|TBB3_HUMAN Tubulin beta-3 chain OS=Homo sapiens OX=9606 GN=TUBB3 PE=1 SV=2;tr|Q9BV28|Q9BV28_HUMAN Tubulin beta chain (Fragment) OS=Homo sapiens OX=9606 GN=TUBB3 PE=2 SV=2;tr|Q53G92|Q53G92_HUMAN Tubulin beta chain (Fragment) OS=Homo sapiens OX=960	136440000	131110000	127310000	132800000	98242000	103540000	111260000	110000000
sp|Q13526|PIN1_HUMAN;tr|K7EN45|K7EN45_HUMAN;tr|K7EMU7|K7EMU7_HUMAN;tr|B3KUM4|B3KUM4_HUMAN;tr|Q8NFL2|Q8NFL2_HUMAN;tr|Q49AR7|Q49AR7_HUMAN;sp|O15428|PINL_HUMAN	sp|Q13526|PIN1_HUMAN;tr|K7EN45|K7EN45_HUMAN;tr|K7EMU7|K7EMU7_HUMAN;tr|B3KUM4|B3KUM4_HUMAN	sp|Q13526|PIN1_HUMAN Peptidyl-prolyl cis-trans isomerase NIMA-interacting 1 OS=Homo sapiens OX=9606 GN=PIN1 PE=1 SV=1;tr|K7EN45|K7EN45_HUMAN Peptidyl-prolyl cis-trans isomerase (Fragment) OS=Homo sapiens OX=9606 GN=PIN1 PE=1 SV=1;tr|K7EMU7|K7EMU7_HUMAN Pep	80945000	82249000	63286000	74032000	66540000	70696000	82312000	73201000
sp|Q13561|DCTN2_HUMAN;tr|V9HW58|V9HW58_HUMAN;tr|Q53H88|Q53H88_HUMAN;tr|A8K8J9|A8K8J9_HUMAN;tr|B3KTX4|B3KTX4_HUMAN;tr|H0YI98|H0YI98_HUMAN;tr|F8W1I6|F8W1I6_HUMAN;tr|F8VW18|F8VW18_HUMAN;tr|H0YHL1|H0YHL1_HUMAN;tr|F8VRV7|F8VRV7_HUMAN;tr|F8VX93|F8VX93_HUMAN	sp|Q13561|DCTN2_HUMAN;tr|V9HW58|V9HW58_HUMAN;tr|Q53H88|Q53H88_HUMAN;tr|A8K8J9|A8K8J9_HUMAN;tr|B3KTX4|B3KTX4_HUMAN;tr|H0YI98|H0YI98_HUMAN;tr|F8W1I6|F8W1I6_HUMAN;tr|F8VW18|F8VW18_HUMAN	sp|Q13561|DCTN2_HUMAN Dynactin subunit 2 OS=Homo sapiens OX=9606 GN=DCTN2 PE=1 SV=4;tr|V9HW58|V9HW58_HUMAN Epididymis secretory protein Li 77 OS=Homo sapiens OX=9606 GN=HEL-S-77 PE=2 SV=1;tr|Q53H88|Q53H88_HUMAN Dynactin 2 variant (Fragment) OS=Homo sapiens	217150000	184290000	198090000	202400000	183520000	204500000	191120000	192790000
sp|Q13573|SNW1_HUMAN;tr|Q6I9S2|Q6I9S2_HUMAN;tr|G3V3A4|G3V3A4_HUMAN;tr|B4DEG7|B4DEG7_HUMAN;tr|G3V4X8|G3V4X8_HUMAN;tr|B7Z9X2|B7Z9X2_HUMAN;tr|B4DY36|B4DY36_HUMAN;tr|A0A024R6E3|A0A024R6E3_HUMAN;tr|Q9ULA6|Q9ULA6_HUMAN;tr|Q0D2M5|Q0D2M5_HUMAN;tr|Q6P151|Q6P151_HUMAN;tr|G3V5R3|G3V5R3_HUMAN	sp|Q13573|SNW1_HUMAN;tr|Q6I9S2|Q6I9S2_HUMAN;tr|G3V3A4|G3V3A4_HUMAN;tr|B4DEG7|B4DEG7_HUMAN;tr|G3V4X8|G3V4X8_HUMAN;tr|B7Z9X2|B7Z9X2_HUMAN;tr|B4DY36|B4DY36_HUMAN;tr|A0A024R6E3|A0A024R6E3_HUMAN;tr|Q9ULA6|Q9ULA6_HUMAN	sp|Q13573|SNW1_HUMAN SNW domain-containing protein 1 OS=Homo sapiens OX=9606 GN=SNW1 PE=1 SV=1;tr|Q6I9S2|Q6I9S2_HUMAN SNW1 protein OS=Homo sapiens OX=9606 GN=SNW1 PE=2 SV=1;tr|G3V3A4|G3V3A4_HUMAN SNW domain-containing protein 1 OS=Homo sapiens OX=9606 GN=S	37119000	40366000	38330000	44333000	43571000	42569000	42692000	45144000
sp|Q13740|CD166_HUMAN;tr|F5GXJ9|F5GXJ9_HUMAN;tr|B3KNN9|B3KNN9_HUMAN;tr|B4DX43|B4DX43_HUMAN;tr|H7C543|H7C543_HUMAN	sp|Q13740|CD166_HUMAN;tr|F5GXJ9|F5GXJ9_HUMAN;tr|B3KNN9|B3KNN9_HUMAN	sp|Q13740|CD166_HUMAN CD166 antigen OS=Homo sapiens OX=9606 GN=ALCAM PE=1 SV=2;tr|F5GXJ9|F5GXJ9_HUMAN CD166 antigen OS=Homo sapiens OX=9606 GN=ALCAM PE=1 SV=1;tr|B3KNN9|B3KNN9_HUMAN cDNA FLJ30070 fis, clone ASTRO2000046, highly similar to CD166 ANTIGEN OS=	87077000	74777000	66833000	69789000	73803000	88551000	69783000	73733000
sp|Q13813|SPTN1_HUMAN;tr|A0A0D9SGF6|A0A0D9SGF6_HUMAN;tr|B4DGT1|B4DGT1_HUMAN;tr|Q14917|Q14917_HUMAN;tr|A0A0D9SFF6|A0A0D9SFF6_HUMAN;tr|A0A0D9SFH4|A0A0D9SFH4_HUMAN;tr|A0A1B0GTB7|A0A1B0GTB7_HUMAN;tr|A0A1B0GUH3|A0A1B0GUH3_HUMAN	sp|Q13813|SPTN1_HUMAN;tr|A0A0D9SGF6|A0A0D9SGF6_HUMAN;tr|B4DGT1|B4DGT1_HUMAN	sp|Q13813|SPTN1_HUMAN Spectrin alpha chain, non-erythrocytic 1 OS=Homo sapiens OX=9606 GN=SPTAN1 PE=1 SV=3;tr|A0A0D9SGF6|A0A0D9SGF6_HUMAN Spectrin alpha chain, non-erythrocytic 1 OS=Homo sapiens OX=9606 GN=SPTAN1 PE=1 SV=1;tr|B4DGT1|B4DGT1_HUMAN cDNA FLJ59	3492200000	3344100000	3320900000	3482400000	2831000000	2803400000	2691800000	2823500000
sp|Q13895|BYST_HUMAN;tr|F8WBL2|F8WBL2_HUMAN;tr|H7BY94|H7BY94_HUMAN	sp|Q13895|BYST_HUMAN	sp|Q13895|BYST_HUMAN Bystin OS=Homo sapiens OX=9606 GN=BYSL PE=1 SV=3	23510000	22450000	32344000	32420000	26488000	23320000	36105000	33187000
sp|Q13907|IDI1_HUMAN;tr|C9JKM8|C9JKM8_HUMAN;tr|C9JD53|C9JD53_HUMAN;sp|Q9BXS1|IDI2_HUMAN	sp|Q13907|IDI1_HUMAN	sp|Q13907|IDI1_HUMAN Isopentenyl-diphosphate Delta-isomerase 1 OS=Homo sapiens OX=9606 GN=IDI1 PE=1 SV=2	57280000	47660000	58823000	54830000	69203000	61356000	65395000	67309000
sp|Q14008|CKAP5_HUMAN;tr|Q8IYN5|Q8IYN5_HUMAN;tr|Q8NAH3|Q8NAH3_HUMAN;tr|E9PQH5|E9PQH5_HUMAN;tr|H0YDX5|H0YDX5_HUMAN;tr|H0YCF6|H0YCF6_HUMAN;tr|H0YEK7|H0YEK7_HUMAN	sp|Q14008|CKAP5_HUMAN	sp|Q14008|CKAP5_HUMAN Cytoskeleton-associated protein 5 OS=Homo sapiens OX=9606 GN=CKAP5 PE=1 SV=3	93385000	95477000	112400000	107190000	78347000	86271000	106530000	101920000
sp|Q14019|COTL1_HUMAN;tr|H3BT58|H3BT58_HUMAN	sp|Q14019|COTL1_HUMAN;tr|H3BT58|H3BT58_HUMAN	sp|Q14019|COTL1_HUMAN Coactosin-like protein OS=Homo sapiens OX=9606 GN=COTL1 PE=1 SV=3;tr|H3BT58|H3BT58_HUMAN Coactosin-like protein OS=Homo sapiens OX=9606 GN=COTL1 PE=1 SV=1	324070000	332830000	361500000	321430000	283040000	287660000	295430000	300770000
sp|Q14157|UBP2L_HUMAN;tr|B4DYY5|B4DYY5_HUMAN;tr|F8W726|F8W726_HUMAN;tr|B4DZJ6|B4DZJ6_HUMAN;tr|Q5VU77|Q5VU77_HUMAN;tr|Q5VU79|Q5VU79_HUMAN;tr|Q5VU78|Q5VU78_HUMAN;tr|Q5VU81|Q5VU81_HUMAN;tr|Q5VU80|Q5VU80_HUMAN;tr|H0Y5H6|H0Y5H6_HUMAN;tr|H7C2T8|H7C2T8_HUMAN	sp|Q14157|UBP2L_HUMAN;tr|B4DYY5|B4DYY5_HUMAN;tr|F8W726|F8W726_HUMAN;tr|B4DZJ6|B4DZJ6_HUMAN;tr|Q5VU77|Q5VU77_HUMAN	sp|Q14157|UBP2L_HUMAN Ubiquitin-associated protein 2-like OS=Homo sapiens OX=9606 GN=UBAP2L PE=1 SV=2;tr|B4DYY5|B4DYY5_HUMAN cDNA FLJ55671, highly similar to Ubiquitin-associated protein 2-like OS=Homo sapiens OX=9606 PE=2 SV=1;tr|F8W726|F8W726_HUMAN Ubiqu	199960000	201100000	182780000	205380000	225640000	222990000	205610000	222450000
sp|Q14165|MLEC_HUMAN;tr|F5H1S8|F5H1S8_HUMAN;tr|H0YG07|H0YG07_HUMAN;tr|F5GX14|F5GX14_HUMAN	sp|Q14165|MLEC_HUMAN;tr|F5H1S8|F5H1S8_HUMAN	sp|Q14165|MLEC_HUMAN Malectin OS=Homo sapiens OX=9606 GN=MLEC PE=1 SV=1;tr|F5H1S8|F5H1S8_HUMAN Malectin (Fragment) OS=Homo sapiens OX=9606 GN=MLEC PE=1 SV=1	70446000	61698000	70011000	69023000	48462000	47578000	50027000	60508000
sp|Q14204|DYHC1_HUMAN;tr|B4DSR6|B4DSR6_HUMAN;tr|H0YJ21|H0YJ21_HUMAN;tr|Q6P2H7|Q6P2H7_HUMAN;tr|Q92862|Q92862_HUMAN;tr|Q9NRC3|Q9NRC3_HUMAN	sp|Q14204|DYHC1_HUMAN	sp|Q14204|DYHC1_HUMAN Cytoplasmic dynein 1 heavy chain 1 OS=Homo sapiens OX=9606 GN=DYNC1H1 PE=1 SV=5	2531300000	2552200000	2431300000	2567000000	2725800000	2646200000	2661300000	2706000000
sp|Q14232|EI2BA_HUMAN;tr|F5H0D0|F5H0D0_HUMAN;tr|H0YGG4|H0YGG4_HUMAN	sp|Q14232|EI2BA_HUMAN;tr|F5H0D0|F5H0D0_HUMAN	sp|Q14232|EI2BA_HUMAN Translation initiation factor eIF-2B subunit alpha OS=Homo sapiens OX=9606 GN=EIF2B1 PE=1 SV=1;tr|F5H0D0|F5H0D0_HUMAN Translation initiation factor eIF-2B subunit alpha OS=Homo sapiens OX=9606 GN=EIF2B1 PE=1 SV=1	67209000	59189000	50869000	54673000	67606000	66689000	62294000	61156000
sp|Q14240|IF4A2_HUMAN;tr|E7EQG2|E7EQG2_HUMAN;tr|Q9NZE6|Q9NZE6_HUMAN;tr|Q96B07|Q96B07_HUMAN;tr|B4DJX6|B4DJX6_HUMAN;tr|J3KSN7|J3KSN7_HUMAN;tr|E7EMV8|E7EMV8_HUMAN;tr|Q5JWW0|Q5JWW0_HUMAN;tr|E9PBH4|E9PBH4_HUMAN;tr|C9JUF0|C9JUF0_HUMAN	sp|Q14240|IF4A2_HUMAN;tr|E7EQG2|E7EQG2_HUMAN;tr|Q9NZE6|Q9NZE6_HUMAN;tr|Q96B07|Q96B07_HUMAN;tr|B4DJX6|B4DJX6_HUMAN	sp|Q14240|IF4A2_HUMAN Eukaryotic initiation factor 4A-II OS=Homo sapiens OX=9606 GN=EIF4A2 PE=1 SV=2;tr|E7EQG2|E7EQG2_HUMAN Eukaryotic initiation factor 4A-II OS=Homo sapiens OX=9606 GN=EIF4A2 PE=1 SV=1;tr|Q9NZE6|Q9NZE6_HUMAN BM-010 OS=Homo sapiens OX=9606	118200000	117920000	144170000	118470000	107900000	119460000	130540000	122170000
sp|Q14257|RCN2_HUMAN;tr|H0YL43|H0YL43_HUMAN;tr|A8MXP8|A8MXP8_HUMAN	sp|Q14257|RCN2_HUMAN;tr|H0YL43|H0YL43_HUMAN	sp|Q14257|RCN2_HUMAN Reticulocalbin-2 OS=Homo sapiens OX=9606 GN=RCN2 PE=1 SV=1;tr|H0YL43|H0YL43_HUMAN Reticulocalbin-2 (Fragment) OS=Homo sapiens OX=9606 GN=RCN2 PE=1 SV=1	68124000	62600000	61967000	61041000	54563000	53406000	55014000	61051000
sp|Q14258|TRI25_HUMAN	sp|Q14258|TRI25_HUMAN	sp|Q14258|TRI25_HUMAN E3 ubiquitin/ISG15 ligase TRIM25 OS=Homo sapiens OX=9606 GN=TRIM25 PE=1 SV=2	143820000	128860000	129250000	138690000	127590000	128880000	128570000	137370000
sp|Q14315|FLNC_HUMAN;tr|Q59H94|Q59H94_HUMAN;tr|B3KM41|B3KM41_HUMAN;tr|A4D1J9|A4D1J9_HUMAN	sp|Q14315|FLNC_HUMAN;tr|Q59H94|Q59H94_HUMAN	sp|Q14315|FLNC_HUMAN Filamin-C OS=Homo sapiens OX=9606 GN=FLNC PE=1 SV=3;tr|Q59H94|Q59H94_HUMAN Gamma filamin variant (Fragment) OS=Homo sapiens OX=9606 PE=2 SV=1	917200000	895270000	903470000	856950000	967820000	966790000	942740000	976030000
sp|Q14444|CAPR1_HUMAN;tr|G3V153|G3V153_HUMAN;tr|B3KXU8|B3KXU8_HUMAN;tr|B4DSF8|B4DSF8_HUMAN;tr|E9PLA9|E9PLA9_HUMAN	sp|Q14444|CAPR1_HUMAN;tr|G3V153|G3V153_HUMAN;tr|B3KXU8|B3KXU8_HUMAN;tr|B4DSF8|B4DSF8_HUMAN;tr|E9PLA9|E9PLA9_HUMAN	sp|Q14444|CAPR1_HUMAN Caprin-1 OS=Homo sapiens OX=9606 GN=CAPRIN1 PE=1 SV=2;tr|G3V153|G3V153_HUMAN Caprin-1 OS=Homo sapiens OX=9606 GN=CAPRIN1 PE=1 SV=1;tr|B3KXU8|B3KXU8_HUMAN cDNA FLJ46087 fis, clone TESTI2009497, highly similar to GPI-anchored protein p1	254870000	264150000	231240000	254330000	263820000	266820000	262250000	263640000
sp|Q14566|MCM6_HUMAN;tr|Q4ZG57|Q4ZG57_HUMAN;tr|B4DRF6|B4DRF6_HUMAN;tr|B4E0N7|B4E0N7_HUMAN;tr|Q53T61|Q53T61_HUMAN	sp|Q14566|MCM6_HUMAN;tr|Q4ZG57|Q4ZG57_HUMAN	sp|Q14566|MCM6_HUMAN DNA replication licensing factor MCM6 OS=Homo sapiens OX=9606 GN=MCM6 PE=1 SV=1;tr|Q4ZG57|Q4ZG57_HUMAN DNA helicase (Fragment) OS=Homo sapiens OX=9606 GN=MCM6 PE=3 SV=1	51188000	16864000	26694000	40101000	67517000	81452000	78911000	98198000
sp|Q14573|ITPR3_HUMAN;tr|Q59ES2|Q59ES2_HUMAN;tr|A6H8K3|A6H8K3_HUMAN;tr|Q59H91|Q59H91_HUMAN;sp|Q14643|ITPR1_HUMAN	sp|Q14573|ITPR3_HUMAN;tr|Q59ES2|Q59ES2_HUMAN	sp|Q14573|ITPR3_HUMAN Inositol 1,4,5-trisphosphate receptor type 3 OS=Homo sapiens OX=9606 GN=ITPR3 PE=1 SV=2;tr|Q59ES2|Q59ES2_HUMAN Inositol 1,4,5-trisphosphate receptor type 3 variant (Fragment) OS=Homo sapiens OX=9606 PE=2 SV=1	97623000	99782000	102570000	100890000	86438000	93900000	102130000	92743000
sp|Q14684|RRP1B_HUMAN;tr|Q6PJM8|Q6PJM8_HUMAN	sp|Q14684|RRP1B_HUMAN	sp|Q14684|RRP1B_HUMAN Ribosomal RNA processing protein 1 homolog B OS=Homo sapiens OX=9606 GN=RRP1B PE=1 SV=3	21188000	25927000	25475000	31573000	23170000	22546000	23510000	26544000
sp|Q14696|MESD_HUMAN	sp|Q14696|MESD_HUMAN	sp|Q14696|MESD_HUMAN LRP chaperone MESD OS=Homo sapiens OX=9606 GN=MESD PE=1 SV=2	58334000	55765000	54848000	51605000	57325000	56959000	58016000	60032000
sp|Q14739|LBR_HUMAN;tr|A0A024R3R5|A0A024R3R5_HUMAN;tr|C9JXK0|C9JXK0_HUMAN	sp|Q14739|LBR_HUMAN;tr|A0A024R3R5|A0A024R3R5_HUMAN	sp|Q14739|LBR_HUMAN Lamin-B receptor OS=Homo sapiens OX=9606 GN=LBR PE=1 SV=2;tr|A0A024R3R5|A0A024R3R5_HUMAN Lamin B receptor, isoform CRA_a OS=Homo sapiens OX=9606 GN=LBR PE=4 SV=1	51188000	56486000	58846000	54141000	51258000	59893000	61888000	58540000
sp|Q14974|IMB1_HUMAN;tr|B2RBR9|B2RBR9_HUMAN;tr|B7Z752|B7Z752_HUMAN;tr|J3KTM9|J3KTM9_HUMAN;tr|B7Z5M1|B7Z5M1_HUMAN;tr|J3QR48|J3QR48_HUMAN;tr|J3QKQ5|J3QKQ5_HUMAN;tr|J3QRG4|J3QRG4_HUMAN	sp|Q14974|IMB1_HUMAN;tr|B2RBR9|B2RBR9_HUMAN;tr|B7Z752|B7Z752_HUMAN;tr|J3KTM9|J3KTM9_HUMAN;tr|B7Z5M1|B7Z5M1_HUMAN	sp|Q14974|IMB1_HUMAN Importin subunit beta-1 OS=Homo sapiens OX=9606 GN=KPNB1 PE=1 SV=2;tr|B2RBR9|B2RBR9_HUMAN cDNA, FLJ95650, highly similar to Homo sapiens karyopherin (importin) beta 1 (KPNB1), mRNA OS=Homo sapiens OX=9606 PE=2 SV=1;tr|B7Z752|B7Z752_HUM	1387300000	1434000000	1322500000	1380800000	1532000000	1568200000	1581700000	1466300000
sp|Q15008|PSMD6_HUMAN;tr|B3KT66|B3KT66_HUMAN;tr|C9J7B7|C9J7B7_HUMAN;tr|C9J0E9|C9J0E9_HUMAN;tr|H7C531|H7C531_HUMAN	sp|Q15008|PSMD6_HUMAN;tr|B3KT66|B3KT66_HUMAN	sp|Q15008|PSMD6_HUMAN 26S proteasome non-ATPase regulatory subunit 6 OS=Homo sapiens OX=9606 GN=PSMD6 PE=1 SV=1;tr|B3KT66|B3KT66_HUMAN Proteasome (Prosome, macropain) 26S subunit, non-ATPase, 6, isoform CRA_c OS=Homo sapiens OX=9606 GN=PSMD6 PE=2 SV=1	273800000	276750000	267380000	281190000	298010000	297440000	280890000	298700000
sp|Q15019|SEPT2_HUMAN;tr|B5MCX3|B5MCX3_HUMAN;tr|C9J938|C9J938_HUMAN;tr|C9JB25|C9JB25_HUMAN;tr|C9J2Q4|C9J2Q4_HUMAN;tr|C9IY94|C9IY94_HUMAN;tr|H7C310|H7C310_HUMAN;tr|C9IZU3|C9IZU3_HUMAN;tr|H7C2Y0|H7C2Y0_HUMAN;tr|C9JQJ4|C9JQJ4_HUMAN;tr|B5MD47|B5MD47_HUMAN;tr|C9JZI2|C9JZI2_HUMAN;tr|A0A1B0GXJ2|A0A1B0GXJ2_HUMAN;tr|C9JFT1|C9JFT1_HUMAN;tr|F8WB65|F8WB65_HUMAN;tr|H7C1T1|H7C1T1_HUMAN;tr|C9JT15|C9JT15_HUMAN;t…	sp|Q15019|SEPT2_HUMAN;tr|B5MCX3|B5MCX3_HUMAN;tr|C9J938|C9J938_HUMAN;tr|C9JB25|C9JB25_HUMAN;tr|C9J2Q4|C9J2Q4_HUMAN	sp|Q15019|SEPT2_HUMAN Septin-2 OS=Homo sapiens OX=9606 GN=SEPT2 PE=1 SV=1;tr|B5MCX3|B5MCX3_HUMAN Septin-2 OS=Homo sapiens OX=9606 GN=SEPT2 PE=1 SV=1;tr|C9J938|C9J938_HUMAN Septin-2 (Fragment) OS=Homo sapiens OX=9606 GN=SEPT2 PE=1 SV=1;tr|C9JB25|C9JB25_HUMA	371530000	353270000	305340000	329050000	356090000	378550000	334400000	345030000
sp|Q15020|SART3_HUMAN;tr|B4DYA2|B4DYA2_HUMAN;tr|F8VV04|F8VV04_HUMAN;tr|B4DRG9|B4DRG9_HUMAN;tr|B4E3R6|B4E3R6_HUMAN;tr|H0YHU8|H0YHU8_HUMAN;tr|F8W667|F8W667_HUMAN	sp|Q15020|SART3_HUMAN;tr|B4DYA2|B4DYA2_HUMAN;tr|F8VV04|F8VV04_HUMAN;tr|B4DRG9|B4DRG9_HUMAN	sp|Q15020|SART3_HUMAN Squamous cell carcinoma antigen recognized by T-cells 3 OS=Homo sapiens OX=9606 GN=SART3 PE=1 SV=1;tr|B4DYA2|B4DYA2_HUMAN cDNA FLJ50292, highly similar to Squamous cell carcinoma antigen recognized byT-cells 3 OS=Homo sapiens OX=9606	77318000	68679000	74498000	67523000	69886000	66827000	68526000	74006000
sp|Q15021|CND1_HUMAN;tr|B3KY03|B3KY03_HUMAN;tr|B3KMS0|B3KMS0_HUMAN;tr|B4E0B7|B4E0B7_HUMAN;tr|E7EN77|E7EN77_HUMAN;tr|Q6ZV00|Q6ZV00_HUMAN;tr|A0PJ76|A0PJ76_HUMAN;tr|F5GZK7|F5GZK7_HUMAN;tr|F5H431|F5H431_HUMAN	sp|Q15021|CND1_HUMAN;tr|B3KY03|B3KY03_HUMAN;tr|B3KMS0|B3KMS0_HUMAN;tr|B4E0B7|B4E0B7_HUMAN;tr|E7EN77|E7EN77_HUMAN;tr|Q6ZV00|Q6ZV00_HUMAN	sp|Q15021|CND1_HUMAN Condensin complex subunit 1 OS=Homo sapiens OX=9606 GN=NCAPD2 PE=1 SV=3;tr|B3KY03|B3KY03_HUMAN Condensin complex subunit 1 OS=Homo sapiens OX=9606 PE=2 SV=1;tr|B3KMS0|B3KMS0_HUMAN Condensin complex subunit 1 OS=Homo sapiens OX=9606 PE=	101250000	106570000	103680000	110100000	114950000	102780000	102110000	105270000
sp|Q15046|SYK_HUMAN;tr|Q6ZTI3|Q6ZTI3_HUMAN;tr|H3BVA8|H3BVA8_HUMAN;tr|J3KRL2|J3KRL2_HUMAN;tr|H3BRC9|H3BRC9_HUMAN;tr|H3BPV7|H3BPV7_HUMAN	sp|Q15046|SYK_HUMAN;tr|Q6ZTI3|Q6ZTI3_HUMAN	sp|Q15046|SYK_HUMAN Lysine--tRNA ligase OS=Homo sapiens OX=9606 GN=KARS PE=1 SV=3;tr|Q6ZTI3|Q6ZTI3_HUMAN cDNA FLJ44621 fis, clone BRACE2016896, highly similar to Lysyl-tRNA synthetase (EC 6.1.1.6) OS=Homo sapiens OX=9606 PE=2 SV=1	245510000	268060000	263160000	258830000	229200000	238240000	228420000	238910000
sp|Q15056|IF4H_HUMAN;tr|Q75MU1|Q75MU1_HUMAN;tr|B4DMV6|B4DMV6_HUMAN;tr|Q75MU2|Q75MU2_HUMAN;tr|A4D198|A4D198_HUMAN;tr|Q75MT8|Q75MT8_HUMAN	sp|Q15056|IF4H_HUMAN;tr|Q75MU1|Q75MU1_HUMAN;tr|B4DMV6|B4DMV6_HUMAN;tr|Q75MU2|Q75MU2_HUMAN;tr|A4D198|A4D198_HUMAN	sp|Q15056|IF4H_HUMAN Eukaryotic translation initiation factor 4H OS=Homo sapiens OX=9606 GN=EIF4H PE=1 SV=5;tr|Q75MU1|Q75MU1_HUMAN Uncharacterized protein WBSCR1 (Fragment) OS=Homo sapiens OX=9606 GN=WBSCR1 PE=4 SV=1;tr|B4DMV6|B4DMV6_HUMAN cDNA FLJ60708, h	371450000	383890000	436330000	406570000	327640000	403660000	402660000	404690000
sp|Q15075|EEA1_HUMAN;tr|A8K7J3|A8K7J3_HUMAN;tr|Q05D76|Q05D76_HUMAN	sp|Q15075|EEA1_HUMAN;tr|A8K7J3|A8K7J3_HUMAN	sp|Q15075|EEA1_HUMAN Early endosome antigen 1 OS=Homo sapiens OX=9606 GN=EEA1 PE=1 SV=2;tr|A8K7J3|A8K7J3_HUMAN cDNA FLJ75535, highly similar to Homo sapiens early endosome antigen 1, 162kD (EEA1), mRNA (Fragment) OS=Homo sapiens OX=9606 PE=2 SV=1	104080000	97574000	108880000	100410000	91141000	93151000	86514000	86172000
sp|Q15084|PDIA6_HUMAN	sp|Q15084|PDIA6_HUMAN	sp|Q15084|PDIA6_HUMAN Protein disulfide-isomerase A6 OS=Homo sapiens OX=9606 GN=PDIA6 PE=1 SV=1	887060000	909640000	830670000	850400000	881810000	762510000	744940000	713110000
sp|Q15149|PLEC_HUMAN;tr|D3DWL0|D3DWL0_HUMAN;tr|Q96IE3|Q96IE3_HUMAN;tr|E9PMV1|E9PMV1_HUMAN;tr|H0YDN1|H0YDN1_HUMAN;tr|E9PKG0|E9PKG0_HUMAN;tr|A0A075B730|A0A075B730_HUMAN;sp|P58107|EPIPL_HUMAN;tr|E9PIA2|E9PIA2_HUMAN;tr|E9PQ28|E9PQ28_HUMAN	sp|Q15149|PLEC_HUMAN;tr|D3DWL0|D3DWL0_HUMAN	sp|Q15149|PLEC_HUMAN Plectin OS=Homo sapiens OX=9606 GN=PLEC PE=1 SV=3;tr|D3DWL0|D3DWL0_HUMAN Plectin 1, intermediate filament binding protein 500kDa, isoform CRA_b OS=Homo sapiens OX=9606 GN=PLEC1 PE=4 SV=1	10555000000	9948600000	9819700000	9904200000	8224500000	8032700000	7861200000	8212800000
sp|Q15393|SF3B3_HUMAN;tr|A8K6V3|A8K6V3_HUMAN;tr|B3KQH1|B3KQH1_HUMAN;tr|B3KM77|B3KM77_HUMAN;tr|J3QRB2|J3QRB2_HUMAN;tr|J3QL37|J3QL37_HUMAN;tr|I3L4G7|I3L4G7_HUMAN;tr|J3QKV4|J3QKV4_HUMAN	sp|Q15393|SF3B3_HUMAN;tr|A8K6V3|A8K6V3_HUMAN;tr|B3KQH1|B3KQH1_HUMAN	sp|Q15393|SF3B3_HUMAN Splicing factor 3B subunit 3 OS=Homo sapiens OX=9606 GN=SF3B3 PE=1 SV=4;tr|A8K6V3|A8K6V3_HUMAN cDNA FLJ78677, highly similar to Homo sapiens splicing factor 3b, subunit 3, 130kDa (SF3B3), mRNA OS=Homo sapiens OX=9606 PE=2 SV=1;tr|B3KQ	273480000	256660000	272810000	250160000	315850000	294910000	294930000	282590000
sp|Q15417|CNN3_HUMAN;tr|E9PDU6|E9PDU6_HUMAN;tr|Q9BWY6|Q9BWY6_HUMAN	sp|Q15417|CNN3_HUMAN;tr|E9PDU6|E9PDU6_HUMAN	sp|Q15417|CNN3_HUMAN Calponin-3 OS=Homo sapiens OX=9606 GN=CNN3 PE=1 SV=1;tr|E9PDU6|E9PDU6_HUMAN Calponin (Fragment) OS=Homo sapiens OX=9606 GN=CNN3 PE=1 SV=1	394700000	373010000	315370000	359600000	474000000	427640000	449640000	440020000
sp|Q15691|MARE1_HUMAN;tr|B4DM33|B4DM33_HUMAN;tr|A2VCR0|A2VCR0_HUMAN;tr|C9JB30|C9JB30_HUMAN;tr|B2R5W6|B2R5W6_HUMAN;sp|Q9UPY8|MARE3_HUMAN	sp|Q15691|MARE1_HUMAN;tr|B4DM33|B4DM33_HUMAN;tr|A2VCR0|A2VCR0_HUMAN	sp|Q15691|MARE1_HUMAN Microtubule-associated protein RP/EB family member 1 OS=Homo sapiens OX=9606 GN=MAPRE1 PE=1 SV=3;tr|B4DM33|B4DM33_HUMAN cDNA FLJ52068, highly similar to Microtubule-associated protein RP/EB family member 1 OS=Homo sapiens OX=9606 PE=2	766210000	692030000	630030000	615750000	693230000	702160000	650860000	668140000
sp|Q15717|ELAV1_HUMAN;tr|M0QZR9|M0QZR9_HUMAN;tr|M0R055|M0R055_HUMAN	sp|Q15717|ELAV1_HUMAN;tr|M0QZR9|M0QZR9_HUMAN	sp|Q15717|ELAV1_HUMAN ELAV-like protein 1 OS=Homo sapiens OX=9606 GN=ELAVL1 PE=1 SV=2;tr|M0QZR9|M0QZR9_HUMAN ELAV-like protein 1 OS=Homo sapiens OX=9606 GN=ELAVL1 PE=1 SV=1	286440000	292500000	263610000	289260000	306900000	302650000	285740000	297130000
sp|Q15738|NSDHL_HUMAN;tr|C9JDR0|C9JDR0_HUMAN	sp|Q15738|NSDHL_HUMAN;tr|C9JDR0|C9JDR0_HUMAN	sp|Q15738|NSDHL_HUMAN Sterol-4-alpha-carboxylate 3-dehydrogenase, decarboxylating OS=Homo sapiens OX=9606 GN=NSDHL PE=1 SV=2;tr|C9JDR0|C9JDR0_HUMAN Sterol-4-alpha-carboxylate 3-dehydrogenase, decarboxylating (Fragment) OS=Homo sapiens OX=9606 GN=NSDHL PE=1	29277000	33968000	35161000	31140000	33259000	31406000	34885000	34856000
sp|Q15785|TOM34_HUMAN;tr|B4DXU3|B4DXU3_HUMAN;tr|Q6ZPD0|Q6ZPD0_HUMAN	sp|Q15785|TOM34_HUMAN;tr|B4DXU3|B4DXU3_HUMAN	sp|Q15785|TOM34_HUMAN Mitochondrial import receptor subunit TOM34 OS=Homo sapiens OX=9606 GN=TOMM34 PE=1 SV=2;tr|B4DXU3|B4DXU3_HUMAN cDNA FLJ54989, highly similar to Mitochondrial import receptor subunit TOM34 OS=Homo sapiens OX=9606 PE=2 SV=1	134040000	105270000	119490000	85052000	159590000	161590000	143310000	145350000
sp|Q15907|RB11B_HUMAN;tr|M0R2D0|M0R2D0_HUMAN	sp|Q15907|RB11B_HUMAN	sp|Q15907|RB11B_HUMAN Ras-related protein Rab-11B OS=Homo sapiens OX=9606 GN=RAB11B PE=1 SV=4	553240000	514670000	529540000	482130000	451970000	494710000	472490000	459640000
sp|Q15942|ZYX_HUMAN;tr|Q96AF9|Q96AF9_HUMAN;tr|B4DY85|B4DY85_HUMAN;tr|Q28617|Q28617_HUMAN;tr|H0Y2Y8|H0Y2Y8_HUMAN;tr|Q9BUS0|Q9BUS0_HUMAN;tr|B4DQR8|B4DQR8_HUMAN;tr|H7C3D3|H7C3D3_HUMAN;tr|C9JJK5|C9JJK5_HUMAN;tr|C9IZ41|C9IZ41_HUMAN;tr|H7C3R3|H7C3R3_HUMAN	sp|Q15942|ZYX_HUMAN;tr|Q96AF9|Q96AF9_HUMAN;tr|B4DY85|B4DY85_HUMAN;tr|Q28617|Q28617_HUMAN;tr|H0Y2Y8|H0Y2Y8_HUMAN;tr|Q9BUS0|Q9BUS0_HUMAN;tr|B4DQR8|B4DQR8_HUMAN	sp|Q15942|ZYX_HUMAN Zyxin OS=Homo sapiens OX=9606 GN=ZYX PE=1 SV=1;tr|Q96AF9|Q96AF9_HUMAN ZYX protein (Fragment) OS=Homo sapiens OX=9606 GN=ZYX PE=2 SV=2;tr|B4DY85|B4DY85_HUMAN cDNA FLJ61463, highly similar to Zyxin OS=Homo sapiens OX=9606 PE=2 SV=1;tr|Q28	106770000	94649000	88162000	108290000	121540000	109990000	113870000	126860000
sp|Q16181|SEPT7_HUMAN;tr|Q59EY4|Q59EY4_HUMAN;tr|B4DUD6|B4DUD6_HUMAN;tr|Q8TC62|Q8TC62_HUMAN;tr|E7ES33|E7ES33_HUMAN;tr|Q3LIE9|Q3LIE9_HUMAN;tr|A4GYY8|A4GYY8_HUMAN;tr|A8K3D0|A8K3D0_HUMAN;tr|E7EPK1|E7EPK1_HUMAN;tr|B4DNE4|B4DNE4_HUMAN;tr|A0A024RA87|A0A024RA87_HUMAN;tr|G3V1Q4|G3V1Q4_HUMAN;tr|A0A023T695|A0A023T695_HUMAN;tr|B4DPQ6|B4DPQ6_HUMAN;tr|Q3B7A3|Q3B7A3_HUMAN;tr|A0A0U1RRE1|A0A0U1RRE1_HUMAN;tr|A0A0U…	sp|Q16181|SEPT7_HUMAN;tr|Q59EY4|Q59EY4_HUMAN;tr|B4DUD6|B4DUD6_HUMAN;tr|Q8TC62|Q8TC62_HUMAN;tr|E7ES33|E7ES33_HUMAN;tr|Q3LIE9|Q3LIE9_HUMAN;tr|A4GYY8|A4GYY8_HUMAN;tr|A8K3D0|A8K3D0_HUMAN;tr|E7EPK1|E7EPK1_HUMAN;tr|B4DNE4|B4DNE4_HUMAN;tr|A0A024RA87|A0A024RA87_HUMAN;tr|G3V1Q4|G3V1Q4_HUMAN;tr|A0A023T695|A0A023T695_HUMAN;tr|B4DPQ6|B4DPQ6_HUMAN;tr|Q3B7A3|Q3B7A3_HUMAN	sp|Q16181|SEPT7_HUMAN Septin-7 OS=Homo sapiens OX=9606 GN=SEPT7 PE=1 SV=2;tr|Q59EY4|Q59EY4_HUMAN CDC10 protein variant (Fragment) OS=Homo sapiens OX=9606 PE=2 SV=1;tr|B4DUD6|B4DUD6_HUMAN cDNA FLJ54551, highly similar to Septin-7 OS=Homo sapiens OX=9606 PE=	219750000	227830000	217710000	200050000	210470000	242310000	227720000	225220000
sp|Q16186|ADRM1_HUMAN;tr|B4DMP7|B4DMP7_HUMAN;tr|Q68E00|Q68E00_HUMAN;tr|A0A087WX59|A0A087WX59_HUMAN;tr|A0A087WUX6|A0A087WUX6_HUMAN	sp|Q16186|ADRM1_HUMAN;tr|B4DMP7|B4DMP7_HUMAN;tr|Q68E00|Q68E00_HUMAN;tr|A0A087WX59|A0A087WX59_HUMAN	sp|Q16186|ADRM1_HUMAN Proteasomal ubiquitin receptor ADRM1 OS=Homo sapiens OX=9606 GN=ADRM1 PE=1 SV=2;tr|B4DMP7|B4DMP7_HUMAN cDNA FLJ56666, highly similar to Adhesion-regulating molecule 1 OS=Homo sapiens OX=9606 PE=2 SV=1;tr|Q68E00|Q68E00_HUMAN Uncharacte	82832000	82571000	79064000	82459000	88305000	91565000	84591000	90836000
sp|Q16270|IBP7_HUMAN;tr|A0A024RDA6|A0A024RDA6_HUMAN	sp|Q16270|IBP7_HUMAN;tr|A0A024RDA6|A0A024RDA6_HUMAN	sp|Q16270|IBP7_HUMAN Insulin-like growth factor-binding protein 7 OS=Homo sapiens OX=9606 GN=IGFBP7 PE=1 SV=1;tr|A0A024RDA6|A0A024RDA6_HUMAN Insulin-like growth factor binding protein 7, isoform CRA_a (Fragment) OS=Homo sapiens OX=9606 GN=IGFBP7 PE=4 SV=1	69825000	64568000	69303000	63996000	46768000	53455000	35607000	49417000
sp|Q16512|PKN1_HUMAN;tr|Q15523|Q15523_HUMAN;tr|K7EL10|K7EL10_HUMAN;tr|K7EM57|K7EM57_HUMAN;tr|K7EN76|K7EN76_HUMAN;tr|K7EKY9|K7EKY9_HUMAN	sp|Q16512|PKN1_HUMAN;tr|Q15523|Q15523_HUMAN	sp|Q16512|PKN1_HUMAN Serine/threonine-protein kinase N1 OS=Homo sapiens OX=9606 GN=PKN1 PE=1 SV=2;tr|Q15523|Q15523_HUMAN Non-specific serine/threonine protein kinase OS=Homo sapiens OX=9606 PE=2 SV=1	31150000	33592000	32483000	30113000	34604000	30440000	37982000	29980000
sp|Q16531|DDB1_HUMAN;tr|B4DSA8|B4DSA8_HUMAN;tr|F5GY55|F5GY55_HUMAN;tr|B7Z2A1|B7Z2A1_HUMAN;tr|B4DZP5|B4DZP5_HUMAN;tr|F5GZY8|F5GZY8_HUMAN;tr|F5H2L3|F5H2L3_HUMAN;tr|F5GWI0|F5GWI0_HUMAN;tr|F5GYG8|F5GYG8_HUMAN;tr|F5H198|F5H198_HUMAN;tr|B7Z859|B7Z859_HUMAN	sp|Q16531|DDB1_HUMAN;tr|B4DSA8|B4DSA8_HUMAN;tr|F5GY55|F5GY55_HUMAN;tr|B7Z2A1|B7Z2A1_HUMAN;tr|B4DZP5|B4DZP5_HUMAN	sp|Q16531|DDB1_HUMAN DNA damage-binding protein 1 OS=Homo sapiens OX=9606 GN=DDB1 PE=1 SV=1;tr|B4DSA8|B4DSA8_HUMAN cDNA FLJ51067, highly similar to DNA damage-binding protein 1 OS=Homo sapiens OX=9606 PE=2 SV=1;tr|F5GY55|F5GY55_HUMAN DNA damage-binding pro	373160000	388500000	366030000	391220000	563190000	551330000	535160000	527140000
sp|Q16643|DREB_HUMAN;tr|D6R9W4|D6R9W4_HUMAN;tr|B3KSQ7|B3KSQ7_HUMAN;tr|B7Z2Z0|B7Z2Z0_HUMAN;tr|D6RFI1|D6RFI1_HUMAN;tr|D6R9Q9|D6R9Q9_HUMAN;tr|D6RCR4|D6RCR4_HUMAN	sp|Q16643|DREB_HUMAN;tr|D6R9W4|D6R9W4_HUMAN;tr|B3KSQ7|B3KSQ7_HUMAN	sp|Q16643|DREB_HUMAN Drebrin OS=Homo sapiens OX=9606 GN=DBN1 PE=1 SV=4;tr|D6R9W4|D6R9W4_HUMAN Drebrin (Fragment) OS=Homo sapiens OX=9606 GN=DBN1 PE=1 SV=1;tr|B3KSQ7|B3KSQ7_HUMAN Drebrin 1, isoform CRA_d OS=Homo sapiens OX=9606 GN=DBN1 PE=2 SV=1	157170000	160140000	157320000	154340000	169330000	161170000	154720000	168980000
sp|Q16658|FSCN1_HUMAN;tr|B3KTA3|B3KTA3_HUMAN;tr|B3KTM9|B3KTM9_HUMAN;tr|C9JFC0|C9JFC0_HUMAN;tr|A0A0A0MSB2|A0A0A0MSB2_HUMAN	sp|Q16658|FSCN1_HUMAN;tr|B3KTA3|B3KTA3_HUMAN	sp|Q16658|FSCN1_HUMAN Fascin OS=Homo sapiens OX=9606 GN=FSCN1 PE=1 SV=3;tr|B3KTA3|B3KTA3_HUMAN Fascin OS=Homo sapiens OX=9606 PE=2 SV=1	123570000	103510000	92057000	106910000	52975000	55097000	51964000	62359000
sp|Q16777|H2A2C_HUMAN;sp|Q6FI13|H2A2A_HUMAN	sp|Q16777|H2A2C_HUMAN;sp|Q6FI13|H2A2A_HUMAN	sp|Q16777|H2A2C_HUMAN Histone H2A type 2-C OS=Homo sapiens OX=9606 GN=HIST2H2AC PE=1 SV=4;sp|Q6FI13|H2A2A_HUMAN Histone H2A type 2-A OS=Homo sapiens OX=9606 GN=HIST2H2AA3 PE=1 SV=3	6337700000	6066800000	5928400000	5784600000	5003800000	5457300000	6303400000	4995100000
sp|Q16891|MIC60_HUMAN;tr|B9A067|B9A067_HUMAN;tr|B4DKR1|B4DKR1_HUMAN;tr|B4DT20|B4DT20_HUMAN;tr|B4DQY2|B4DQY2_HUMAN;tr|Q05DN3|Q05DN3_HUMAN;tr|D6RAW4|D6RAW4_HUMAN	sp|Q16891|MIC60_HUMAN;tr|B9A067|B9A067_HUMAN;tr|B4DKR1|B4DKR1_HUMAN;tr|B4DT20|B4DT20_HUMAN;tr|B4DQY2|B4DQY2_HUMAN	sp|Q16891|MIC60_HUMAN MICOS complex subunit MIC60 OS=Homo sapiens OX=9606 GN=IMMT PE=1 SV=1;tr|B9A067|B9A067_HUMAN MICOS complex subunit MIC60 OS=Homo sapiens OX=9606 GN=IMMT PE=1 SV=2;tr|B4DKR1|B4DKR1_HUMAN MICOS complex subunit MIC60 OS=Homo sapiens OX=9	289640000	286490000	291030000	296530000	340620000	303170000	297360000	299410000
sp|Q1KMD3|HNRL2_HUMAN;tr|H3BQZ7|H3BQZ7_HUMAN	sp|Q1KMD3|HNRL2_HUMAN;tr|H3BQZ7|H3BQZ7_HUMAN	sp|Q1KMD3|HNRL2_HUMAN Heterogeneous nuclear ribonucleoprotein U-like protein 2 OS=Homo sapiens OX=9606 GN=HNRNPUL2 PE=1 SV=1;tr|H3BQZ7|H3BQZ7_HUMAN HCG2044799 OS=Homo sapiens OX=9606 GN=HNRNPUL2-BSCL2 PE=4 SV=1	228570000	225320000	221990000	240960000	224190000	216170000	211920000	207520000
sp|Q27J81|INF2_HUMAN;tr|A0A0A0MQU1|A0A0A0MQU1_HUMAN	sp|Q27J81|INF2_HUMAN;tr|A0A0A0MQU1|A0A0A0MQU1_HUMAN	sp|Q27J81|INF2_HUMAN Inverted formin-2 OS=Homo sapiens OX=9606 GN=INF2 PE=1 SV=2;tr|A0A0A0MQU1|A0A0A0MQU1_HUMAN Inverted formin-2 (Fragment) OS=Homo sapiens OX=9606 GN=INF2 PE=1 SV=1	94505000	96296000	91546000	95126000	95732000	85716000	82337000	87722000
sp|Q32P28|P3H1_HUMAN;tr|B4DNM8|B4DNM8_HUMAN;tr|E2QRI1|E2QRI1_HUMAN;tr|Q68CW0|Q68CW0_HUMAN;tr|H7C2W6|H7C2W6_HUMAN;tr|B4DTG8|B4DTG8_HUMAN	sp|Q32P28|P3H1_HUMAN;tr|B4DNM8|B4DNM8_HUMAN	sp|Q32P28|P3H1_HUMAN Prolyl 3-hydroxylase 1 OS=Homo sapiens OX=9606 GN=P3H1 PE=1 SV=2;tr|B4DNM8|B4DNM8_HUMAN cDNA FLJ53395, highly similar to Prolyl 3-hydroxylase 1 (EC 1.14.11.7) OS=Homo sapiens OX=9606 PE=2 SV=1	68582000	58348000	68454000	62920000	70456000	56529000	59512000	61106000
sp|Q3YEC7|RABL6_HUMAN;tr|H0Y4Z8|H0Y4Z8_HUMAN;tr|G3V154|G3V154_HUMAN;tr|B3KSV0|B3KSV0_HUMAN;tr|Q9NWD6|Q9NWD6_HUMAN;tr|Q9NW45|Q9NW45_HUMAN;tr|B3KXX7|B3KXX7_HUMAN;tr|H0Y7H6|H0Y7H6_HUMAN;tr|F2Z2T0|F2Z2T0_HUMAN	sp|Q3YEC7|RABL6_HUMAN;tr|H0Y4Z8|H0Y4Z8_HUMAN;tr|G3V154|G3V154_HUMAN;tr|B3KSV0|B3KSV0_HUMAN;tr|Q9NWD6|Q9NWD6_HUMAN;tr|Q9NW45|Q9NW45_HUMAN;tr|B3KXX7|B3KXX7_HUMAN	sp|Q3YEC7|RABL6_HUMAN Rab-like protein 6 OS=Homo sapiens OX=9606 GN=RABL6 PE=1 SV=2;tr|H0Y4Z8|H0Y4Z8_HUMAN Chromosome 9 open reading frame 86, isoform CRA_b OS=Homo sapiens OX=9606 GN=RABL6 PE=1 SV=2;tr|G3V154|G3V154_HUMAN Chromosome 9 open reading frame 8	6630600	5147400	6154500	6327500	8429400	6347900	4692700	5528700
sp|Q3ZCM7|TBB8_HUMAN;tr|A0A075B736|A0A075B736_HUMAN;tr|Q5SQY0|Q5SQY0_HUMAN;tr|A0A183YE00|A0A183YE00_HUMAN	sp|Q3ZCM7|TBB8_HUMAN;tr|A0A075B736|A0A075B736_HUMAN;tr|Q5SQY0|Q5SQY0_HUMAN;tr|A0A183YE00|A0A183YE00_HUMAN	sp|Q3ZCM7|TBB8_HUMAN Tubulin beta-8 chain OS=Homo sapiens OX=9606 GN=TUBB8 PE=1 SV=2;tr|A0A075B736|A0A075B736_HUMAN Tubulin beta chain OS=Homo sapiens OX=9606 GN=TUBB8 PE=1 SV=1;tr|Q5SQY0|Q5SQY0_HUMAN Tubulin beta chain OS=Homo sapiens OX=9606 GN=TUBB8 PE=	2263200000	2099800000	1988900000	2429200000	2212900000	2544300000	2113100000	2276500000
sp|Q3ZCQ8|TIM50_HUMAN;tr|Q0VAB1|Q0VAB1_HUMAN;tr|A0A024R0M6|A0A024R0M6_HUMAN;tr|M0R003|M0R003_HUMAN;tr|M0R2F8|M0R2F8_HUMAN;tr|M0R1Y4|M0R1Y4_HUMAN;tr|M0R0C3|M0R0C3_HUMAN;tr|M0QXC3|M0QXC3_HUMAN;tr|M0R2Z3|M0R2Z3_HUMAN;tr|M0R303|M0R303_HUMAN;tr|M0R2D2|M0R2D2_HUMAN;tr|M0R047|M0R047_HUMAN;tr|M0R2Q2|M0R2Q2_HUMAN	sp|Q3ZCQ8|TIM50_HUMAN;tr|Q0VAB1|Q0VAB1_HUMAN;tr|A0A024R0M6|A0A024R0M6_HUMAN;tr|M0R003|M0R003_HUMAN;tr|M0R2F8|M0R2F8_HUMAN;tr|M0R1Y4|M0R1Y4_HUMAN	sp|Q3ZCQ8|TIM50_HUMAN Mitochondrial import inner membrane translocase subunit TIM50 OS=Homo sapiens OX=9606 GN=TIMM50 PE=1 SV=2;tr|Q0VAB1|Q0VAB1_HUMAN Translocase of inner mitochondrial membrane 50 homolog (S. cerevisiae) OS=Homo sapiens OX=9606 GN=TIMM50	53671000	50219000	49411000	53365000	60141000	53921000	60780000	57464000
sp|Q52LW3|RHG29_HUMAN;tr|F8VWZ8|F8VWZ8_HUMAN	sp|Q52LW3|RHG29_HUMAN;tr|F8VWZ8|F8VWZ8_HUMAN	sp|Q52LW3|RHG29_HUMAN Rho GTPase-activating protein 29 OS=Homo sapiens OX=9606 GN=ARHGAP29 PE=1 SV=2;tr|F8VWZ8|F8VWZ8_HUMAN Rho GTPase-activating protein 29 OS=Homo sapiens OX=9606 GN=ARHGAP29 PE=1 SV=1	26243000	26659000	26918000	25760000	24512000	21283000	22080000	25393000
sp|Q53GQ0|DHB12_HUMAN;tr|D3DR22|D3DR22_HUMAN;tr|B4DWS6|B4DWS6_HUMAN;tr|B3KQJ0|B3KQJ0_HUMAN;tr|A0A1B0GV93|A0A1B0GV93_HUMAN;tr|E9PI21|E9PI21_HUMAN;tr|A0A1B0GVY6|A0A1B0GVY6_HUMAN;tr|A0A1B0GW85|A0A1B0GW85_HUMAN;tr|A0A1B0GU83|A0A1B0GU83_HUMAN	sp|Q53GQ0|DHB12_HUMAN;tr|D3DR22|D3DR22_HUMAN;tr|B4DWS6|B4DWS6_HUMAN;tr|B3KQJ0|B3KQJ0_HUMAN;tr|A0A1B0GV93|A0A1B0GV93_HUMAN	sp|Q53GQ0|DHB12_HUMAN Very-long-chain 3-oxoacyl-CoA reductase OS=Homo sapiens OX=9606 GN=HSD17B12 PE=1 SV=2;tr|D3DR22|D3DR22_HUMAN Hydroxysteroid (17-beta) dehydrogenase 12, isoform CRA_a OS=Homo sapiens OX=9606 GN=HSD17B12 PE=3 SV=1;tr|B4DWS6|B4DWS6_HUMAN	62642000	59835000	52492000	59161000	60326000	60711000	71155000	55258000
sp|Q56VL3|OCAD2_HUMAN;tr|D6RD77|D6RD77_HUMAN;tr|J3KPI9|J3KPI9_HUMAN	sp|Q56VL3|OCAD2_HUMAN	sp|Q56VL3|OCAD2_HUMAN OCIA domain-containing protein 2 OS=Homo sapiens OX=9606 GN=OCIAD2 PE=1 SV=1	25908000	26040000	21370000	25934000	43806000	39753000	38954000	46225000
sp|Q58FF8|H90B2_HUMAN	sp|Q58FF8|H90B2_HUMAN	sp|Q58FF8|H90B2_HUMAN Putative heat shock protein HSP 90-beta 2 OS=Homo sapiens OX=9606 GN=HSP90AB2P PE=1 SV=2	111020000	129390000	132630000	120040000	350680000	195860000	204410000	138650000
sp|Q5JRX3|PREP_HUMAN;tr|B4DRW8|B4DRW8_HUMAN;tr|B4DH07|B4DH07_HUMAN;tr|A0A0A0MRX9|A0A0A0MRX9_HUMAN;tr|B3KN37|B3KN37_HUMAN;tr|B3KM51|B3KM51_HUMAN;tr|B4DEU0|B4DEU0_HUMAN;tr|B1APQ0|B1APQ0_HUMAN;tr|H0Y4F7|H0Y4F7_HUMAN;tr|H0Y7L7|H0Y7L7_HUMAN	sp|Q5JRX3|PREP_HUMAN;tr|B4DRW8|B4DRW8_HUMAN;tr|B4DH07|B4DH07_HUMAN	sp|Q5JRX3|PREP_HUMAN Presequence protease, mitochondrial OS=Homo sapiens OX=9606 GN=PITRM1 PE=1 SV=3;tr|B4DRW8|B4DRW8_HUMAN cDNA FLJ54537, highly similar to Homo sapiens pitrilysin metallopeptidase 1 (PITRM1), mRNA OS=Homo sapiens OX=9606 PE=2 SV=1;tr|B4DH	32493000	27215000	31053000	30041000	33251000	35211000	32395000	30767000
sp|Q5QJE6|TDIF2_HUMAN;tr|J3KP30|J3KP30_HUMAN;tr|B7Z854|B7Z854_HUMAN;tr|E9PRB3|E9PRB3_HUMAN	sp|Q5QJE6|TDIF2_HUMAN;tr|J3KP30|J3KP30_HUMAN;tr|B7Z854|B7Z854_HUMAN;tr|E9PRB3|E9PRB3_HUMAN	sp|Q5QJE6|TDIF2_HUMAN Deoxynucleotidyltransferase terminal-interacting protein 2 OS=Homo sapiens OX=9606 GN=DNTTIP2 PE=1 SV=2;tr|J3KP30|J3KP30_HUMAN Deoxynucleotidyltransferase terminal-interacting protein 2 OS=Homo sapiens OX=9606 GN=DNTTIP2 PE=1 SV=1;tr|	32145000	31430000	28387000	30865000	33078000	37264000	33392000	34112000
sp|Q5RKV6|EXOS6_HUMAN	sp|Q5RKV6|EXOS6_HUMAN	sp|Q5RKV6|EXOS6_HUMAN Exosome complex component MTR3 OS=Homo sapiens OX=9606 GN=EXOSC6 PE=1 SV=1	24778000	23142000	26072000	28236000	33530000	33921000	29765000	33497000
sp|Q5SRE7|PHYD1_HUMAN;tr|G5E9M0|G5E9M0_HUMAN;tr|X6RJK6|X6RJK6_HUMAN;tr|A0A024R893|A0A024R893_HUMAN;tr|H7C3M4|H7C3M4_HUMAN;tr|X6RFQ9|X6RFQ9_HUMAN;tr|X6RCI6|X6RCI6_HUMAN;tr|B3KNT6|B3KNT6_HUMAN	sp|Q5SRE7|PHYD1_HUMAN;tr|G5E9M0|G5E9M0_HUMAN;tr|X6RJK6|X6RJK6_HUMAN;tr|A0A024R893|A0A024R893_HUMAN	sp|Q5SRE7|PHYD1_HUMAN Phytanoyl-CoA dioxygenase domain-containing protein 1 OS=Homo sapiens OX=9606 GN=PHYHD1 PE=1 SV=2;tr|G5E9M0|G5E9M0_HUMAN Phytanoyl-CoA dioxygenase domain containing 1, isoform CRA_c OS=Homo sapiens OX=9606 GN=PHYHD1 PE=1 SV=1;tr|X6RJK	14676000	13432000	14173000	14453000	12284000	14115000	9682200	11725000
sp|Q5SSJ5|HP1B3_HUMAN;tr|X6RGJ2|X6RGJ2_HUMAN;tr|B0QZK4|B0QZK4_HUMAN;tr|Q5SWC8|Q5SWC8_HUMAN;tr|B0QZK8|B0QZK8_HUMAN;tr|B0QZK9|B0QZK9_HUMAN	sp|Q5SSJ5|HP1B3_HUMAN;tr|X6RGJ2|X6RGJ2_HUMAN;tr|B0QZK4|B0QZK4_HUMAN;tr|Q5SWC8|Q5SWC8_HUMAN	sp|Q5SSJ5|HP1B3_HUMAN Heterochromatin protein 1-binding protein 3 OS=Homo sapiens OX=9606 GN=HP1BP3 PE=1 SV=1;tr|X6RGJ2|X6RGJ2_HUMAN Heterochromatin protein 1-binding protein 3 (Fragment) OS=Homo sapiens OX=9606 GN=HP1BP3 PE=1 SV=1;tr|B0QZK4|B0QZK4_HUMAN H	33632000	36119000	54952000	54454000	18374000	20558000	38149000	33500000
sp|Q5T4S7|UBR4_HUMAN;tr|A0A024RAC9|A0A024RAC9_HUMAN;tr|A0A0A0MSW0|A0A0A0MSW0_HUMAN;tr|B3KMT2|B3KMT2_HUMAN;tr|X6R960|X6R960_HUMAN;tr|X6RE05|X6RE05_HUMAN;tr|B3KM62|B3KM62_HUMAN;tr|B4DPF6|B4DPF6_HUMAN;tr|B4DYV5|B4DYV5_HUMAN;tr|Q96HY5|Q96HY5_HUMAN;tr|Q5TBN9|Q5TBN9_HUMAN	sp|Q5T4S7|UBR4_HUMAN	sp|Q5T4S7|UBR4_HUMAN E3 ubiquitin-protein ligase UBR4 OS=Homo sapiens OX=9606 GN=UBR4 PE=1 SV=1	103530000	95058000	89682000	92252000	94239000	95055000	92640000	84970000
sp|Q5VYK3|ECM29_HUMAN;tr|J3KN16|J3KN16_HUMAN;tr|B3KXF2|B3KXF2_HUMAN;tr|R4GMY1|R4GMY1_HUMAN;tr|B3KV72|B3KV72_HUMAN;tr|R4GMY3|R4GMY3_HUMAN;tr|F6XAQ5|F6XAQ5_HUMAN	sp|Q5VYK3|ECM29_HUMAN;tr|J3KN16|J3KN16_HUMAN;tr|B3KXF2|B3KXF2_HUMAN	sp|Q5VYK3|ECM29_HUMAN Proteasome adapter and scaffold protein ECM29 OS=Homo sapiens OX=9606 GN=ECPAS PE=1 SV=2;tr|J3KN16|J3KN16_HUMAN Proteasome adapter and scaffold protein ECM29 OS=Homo sapiens OX=9606 GN=ECPAS PE=1 SV=1;tr|B3KXF2|B3KXF2_HUMAN cDNA FLJ45	101620000	104840000	97406000	114150000	108870000	96691000	105940000	103190000
sp|Q6DD88|ATLA3_HUMAN;tr|F5H6I7|F5H6I7_HUMAN;tr|B4DXC4|B4DXC4_HUMAN;tr|F5GWF8|F5GWF8_HUMAN	sp|Q6DD88|ATLA3_HUMAN;tr|F5H6I7|F5H6I7_HUMAN;tr|B4DXC4|B4DXC4_HUMAN	sp|Q6DD88|ATLA3_HUMAN Atlastin-3 OS=Homo sapiens OX=9606 GN=ATL3 PE=1 SV=1;tr|F5H6I7|F5H6I7_HUMAN Atlastin-3 OS=Homo sapiens OX=9606 GN=ATL3 PE=1 SV=1;tr|B4DXC4|B4DXC4_HUMAN cDNA FLJ58636, moderately similar to Atlastin OS=Homo sapiens OX=9606 PE=2 SV=1	163730000	166570000	152770000	160350000	152290000	150310000	160070000	151020000
sp|Q6DKJ4|NXN_HUMAN;tr|A0A0C4DGI2|A0A0C4DGI2_HUMAN;tr|I3L4V6|I3L4V6_HUMAN;tr|A0A0G2JQK5|A0A0G2JQK5_HUMAN;tr|B4DNN6|B4DNN6_HUMAN	sp|Q6DKJ4|NXN_HUMAN;tr|A0A0C4DGI2|A0A0C4DGI2_HUMAN	sp|Q6DKJ4|NXN_HUMAN Nucleoredoxin OS=Homo sapiens OX=9606 GN=NXN PE=1 SV=2;tr|A0A0C4DGI2|A0A0C4DGI2_HUMAN Nucleoredoxin OS=Homo sapiens OX=9606 GN=NXN PE=1 SV=1	27437000	26377000	24440000	27012000	21437000	24033000	20567000	20151000
sp|Q6GMV3|PTRD1_HUMAN	sp|Q6GMV3|PTRD1_HUMAN	sp|Q6GMV3|PTRD1_HUMAN Putative peptidyl-tRNA hydrolase PTRHD1 OS=Homo sapiens OX=9606 GN=PTRHD1 PE=1 SV=1	30799000	29318000	35766000	29002000	19546000	23547000	26704000	31730000
sp|Q6IBS0|TWF2_HUMAN;tr|D6RG15|D6RG15_HUMAN;tr|H0Y858|H0Y858_HUMAN;tr|B4E0A1|B4E0A1_HUMAN;tr|H7C5I2|H7C5I2_HUMAN	sp|Q6IBS0|TWF2_HUMAN;tr|D6RG15|D6RG15_HUMAN	sp|Q6IBS0|TWF2_HUMAN Twinfilin-2 OS=Homo sapiens OX=9606 GN=TWF2 PE=1 SV=2;tr|D6RG15|D6RG15_HUMAN Twinfilin-2 OS=Homo sapiens OX=9606 GN=TWF2 PE=1 SV=1	175570000	168250000	168380000	169340000	165600000	185410000	190840000	194400000
sp|Q6P2Q9|PRP8_HUMAN;tr|B4DK16|B4DK16_HUMAN;tr|I3L0J9|I3L0J9_HUMAN;tr|Q53GM6|Q53GM6_HUMAN;tr|I3L3Z8|I3L3Z8_HUMAN;tr|Q6JH03|Q6JH03_HUMAN;tr|Q6JH02|Q6JH02_HUMAN	sp|Q6P2Q9|PRP8_HUMAN	sp|Q6P2Q9|PRP8_HUMAN Pre-mRNA-processing-splicing factor 8 OS=Homo sapiens OX=9606 GN=PRPF8 PE=1 SV=2	236160000	251660000	289400000	287720000	251620000	272510000	299300000	275180000
sp|Q6PIU2|NCEH1_HUMAN;tr|A0A0R4J2G3|A0A0R4J2G3_HUMAN;tr|A0A0A0MTJ9|A0A0A0MTJ9_HUMAN;tr|H7C046|H7C046_HUMAN;tr|F8WE33|F8WE33_HUMAN	sp|Q6PIU2|NCEH1_HUMAN;tr|A0A0R4J2G3|A0A0R4J2G3_HUMAN;tr|A0A0A0MTJ9|A0A0A0MTJ9_HUMAN;tr|H7C046|H7C046_HUMAN	sp|Q6PIU2|NCEH1_HUMAN Neutral cholesterol ester hydrolase 1 OS=Homo sapiens OX=9606 GN=NCEH1 PE=1 SV=3;tr|A0A0R4J2G3|A0A0R4J2G3_HUMAN Arylacetamide deacetylase-like 1 OS=Homo sapiens OX=9606 GN=NCEH1 PE=1 SV=1;tr|A0A0A0MTJ9|A0A0A0MTJ9_HUMAN Neutral cholest	217130000	216080000	203580000	209380000	245570000	211230000	219370000	209990000
sp|Q6PKG0|LARP1_HUMAN;tr|A0A0B4J210|A0A0B4J210_HUMAN;tr|E5RH50|E5RH50_HUMAN;tr|H0YC33|H0YC33_HUMAN;tr|H0YAN4|H0YAN4_HUMAN;tr|H0YC73|H0YC73_HUMAN;tr|H0YBW1|H0YBW1_HUMAN;tr|H0YAX9|H0YAX9_HUMAN;tr|E5RHK4|E5RHK4_HUMAN;sp|Q659C4|LAR1B_HUMAN	sp|Q6PKG0|LARP1_HUMAN;tr|A0A0B4J210|A0A0B4J210_HUMAN;tr|E5RH50|E5RH50_HUMAN	sp|Q6PKG0|LARP1_HUMAN La-related protein 1 OS=Homo sapiens OX=9606 GN=LARP1 PE=1 SV=2;tr|A0A0B4J210|A0A0B4J210_HUMAN La-related protein 1 (Fragment) OS=Homo sapiens OX=9606 GN=LARP1 PE=1 SV=5;tr|E5RH50|E5RH50_HUMAN La-related protein 1 (Fragment) OS=Homo s	82446000	86131000	99230000	101710000	89082000	89604000	95848000	102560000
sp|Q6XZF7|DNMBP_HUMAN;tr|A0A1C7CYY6|A0A1C7CYY6_HUMAN;tr|A0A1B0GTX1|A0A1B0GTX1_HUMAN;tr|B4E0Q3|B4E0Q3_HUMAN	sp|Q6XZF7|DNMBP_HUMAN	sp|Q6XZF7|DNMBP_HUMAN Dynamin-binding protein OS=Homo sapiens OX=9606 GN=DNMBP PE=1 SV=1	57085000	51544000	58348000	56946000	53200000	47002000	23792000	46309000
sp|Q6YN16|HSDL2_HUMAN;tr|B2R923|B2R923_HUMAN;tr|A0A024R159|A0A024R159_HUMAN;tr|B4E136|B4E136_HUMAN;tr|B4DWC7|B4DWC7_HUMAN	sp|Q6YN16|HSDL2_HUMAN;tr|B2R923|B2R923_HUMAN;tr|A0A024R159|A0A024R159_HUMAN	sp|Q6YN16|HSDL2_HUMAN Hydroxysteroid dehydrogenase-like protein 2 OS=Homo sapiens OX=9606 GN=HSDL2 PE=1 SV=1;tr|B2R923|B2R923_HUMAN cDNA, FLJ94174 OS=Homo sapiens OX=9606 PE=2 SV=1;tr|A0A024R159|A0A024R159_HUMAN Hydroxysteroid dehydrogenase like 2, isoform	35888000	40865000	34518000	35690000	39857000	35022000	36160000	33704000
sp|Q70J99|UN13D_HUMAN;tr|B4DTQ6|B4DTQ6_HUMAN;tr|K7EIH3|K7EIH3_HUMAN;tr|K7EQ37|K7EQ37_HUMAN;tr|K7EN81|K7EN81_HUMAN;tr|K7EMK8|K7EMK8_HUMAN;tr|K7EN29|K7EN29_HUMAN	sp|Q70J99|UN13D_HUMAN;tr|B4DTQ6|B4DTQ6_HUMAN	sp|Q70J99|UN13D_HUMAN Protein unc-13 homolog D OS=Homo sapiens OX=9606 GN=UNC13D PE=1 SV=1;tr|B4DTQ6|B4DTQ6_HUMAN cDNA FLJ54883, highly similar to Unc-13 homolog D OS=Homo sapiens OX=9606 PE=2 SV=1	84063000	85404000	92765000	90898000	77893000	81070000	87668000	88787000
sp|Q70UQ0|IKIP_HUMAN;tr|Q3B7K3|Q3B7K3_HUMAN	sp|Q70UQ0|IKIP_HUMAN;tr|Q3B7K3|Q3B7K3_HUMAN	sp|Q70UQ0|IKIP_HUMAN Inhibitor of nuclear factor kappa-B kinase-interacting protein OS=Homo sapiens OX=9606 GN=IKBIP PE=1 SV=1;tr|Q3B7K3|Q3B7K3_HUMAN IKIP protein (Fragment) OS=Homo sapiens OX=9606 GN=IKIP PE=2 SV=1	50652000	56622000	73840000	69139000	38772000	50222000	54409000	60691000
sp|Q71DI3|H32_HUMAN	sp|Q71DI3|H32_HUMAN	sp|Q71DI3|H32_HUMAN Histone H3.2 OS=Homo sapiens OX=9606 GN=HIST2H3A PE=1 SV=3	119080000	239400000	173410000	70820000	31594000	84925000	184620000	35450000
sp|Q71UI9|H2AV_HUMAN;sp|P0C0S5|H2AZ_HUMAN;tr|C9J0D1|C9J0D1_HUMAN;tr|C9J386|C9J386_HUMAN	sp|Q71UI9|H2AV_HUMAN;sp|P0C0S5|H2AZ_HUMAN;tr|C9J0D1|C9J0D1_HUMAN	sp|Q71UI9|H2AV_HUMAN Histone H2A.V OS=Homo sapiens OX=9606 GN=H2AFV PE=1 SV=3;sp|P0C0S5|H2AZ_HUMAN Histone H2A.Z OS=Homo sapiens OX=9606 GN=H2AFZ PE=1 SV=2;tr|C9J0D1|C9J0D1_HUMAN Histone H2A OS=Homo sapiens OX=9606 GN=H2AFV PE=1 SV=1	113390000	157360000	339310000	223220000	70061000	100740000	218260000	87551000
sp|Q7L2H7|EIF3M_HUMAN;tr|J3KNJ2|J3KNJ2_HUMAN;tr|H0YCQ8|H0YCQ8_HUMAN;tr|E9PN86|E9PN86_HUMAN;tr|E9PRY0|E9PRY0_HUMAN;tr|E7ESM3|E7ESM3_HUMAN;tr|E9PRI2|E9PRI2_HUMAN;tr|B4DT09|B4DT09_HUMAN	sp|Q7L2H7|EIF3M_HUMAN;tr|J3KNJ2|J3KNJ2_HUMAN;tr|H0YCQ8|H0YCQ8_HUMAN	sp|Q7L2H7|EIF3M_HUMAN Eukaryotic translation initiation factor 3 subunit M OS=Homo sapiens OX=9606 GN=EIF3M PE=1 SV=1;tr|J3KNJ2|J3KNJ2_HUMAN Eukaryotic translation initiation factor 3 subunit M (Fragment) OS=Homo sapiens OX=9606 GN=EIF3M PE=1 SV=1;tr|H0YCQ	227630000	233980000	227390000	221230000	245050000	254860000	272850000	241430000
sp|Q7L576|CYFP1_HUMAN;tr|B3KWV6|B3KWV6_HUMAN;tr|X5D2F4|X5D2F4_HUMAN;tr|B3KWT5|B3KWT5_HUMAN;tr|A0A0G2JR96|A0A0G2JR96_HUMAN;tr|A0A0G2JQT1|A0A0G2JQT1_HUMAN;tr|Q9NSN1|Q9NSN1_HUMAN;tr|E7EW33|E7EW33_HUMAN;tr|B7Z217|B7Z217_HUMAN;tr|H7C229|H7C229_HUMAN;tr|B7Z3H2|B7Z3H2_HUMAN;tr|B7Z4I3|B7Z4I3_HUMAN;tr|E7EVJ5|E7EVJ5_HUMAN;tr|B7Z8N7|B7Z8N7_HUMAN;sp|Q96F07|CYFP2_HUMAN;tr|H0YL50|H0YL50_HUMAN;tr|Q14650|Q14650_…	sp|Q7L576|CYFP1_HUMAN;tr|B3KWV6|B3KWV6_HUMAN;tr|X5D2F4|X5D2F4_HUMAN;tr|B3KWT5|B3KWT5_HUMAN;tr|A0A0G2JR96|A0A0G2JR96_HUMAN;tr|A0A0G2JQT1|A0A0G2JQT1_HUMAN	sp|Q7L576|CYFP1_HUMAN Cytoplasmic FMR1-interacting protein 1 OS=Homo sapiens OX=9606 GN=CYFIP1 PE=1 SV=1;tr|B3KWV6|B3KWV6_HUMAN cDNA FLJ43948 fis, clone TESTI4014924, highly similar to Homo sapiens cytoplasmic FMR1 interacting protein 1 (CYFIP1), transcrip	57183000	70886000	49527000	57593000	49786000	50556000	58085000	63461000
sp|Q7Z434|MAVS_HUMAN	sp|Q7Z434|MAVS_HUMAN	sp|Q7Z434|MAVS_HUMAN Mitochondrial antiviral-signaling protein OS=Homo sapiens OX=9606 GN=MAVS PE=1 SV=2	63690000	58872000	61278000	73602000	59470000	55162000	64650000	63199000
sp|Q7Z4V5|HDGR2_HUMAN;tr|K7EPS6|K7EPS6_HUMAN;tr|A0A087WX58|A0A087WX58_HUMAN;tr|K7ERA4|K7ERA4_HUMAN	sp|Q7Z4V5|HDGR2_HUMAN;tr|K7EPS6|K7EPS6_HUMAN;tr|A0A087WX58|A0A087WX58_HUMAN	sp|Q7Z4V5|HDGR2_HUMAN Hepatoma-derived growth factor-related protein 2 OS=Homo sapiens OX=9606 GN=HDGFL2 PE=1 SV=1;tr|K7EPS6|K7EPS6_HUMAN Hepatoma-derived growth factor-related protein 2 (Fragment) OS=Homo sapiens OX=9606 GN=HDGFL2 PE=1 SV=2;tr|A0A087WX58|	25147000	24968000	25860000	26281000	22427000	23274000	28341000	25736000
sp|Q7Z5L9|I2BP2_HUMAN;tr|B4DTU9|B4DTU9_HUMAN;tr|B4DSJ2|B4DSJ2_HUMAN	sp|Q7Z5L9|I2BP2_HUMAN;tr|B4DTU9|B4DTU9_HUMAN;tr|B4DSJ2|B4DSJ2_HUMAN	sp|Q7Z5L9|I2BP2_HUMAN Interferon regulatory factor 2-binding protein 2 OS=Homo sapiens OX=9606 GN=IRF2BP2 PE=1 SV=2;tr|B4DTU9|B4DTU9_HUMAN cDNA FLJ52600, highly similar to Homo sapiens interferon regulatory factor 2 binding protein 2 (IRF2BP2), mRNA OS=Hom	25830000	22786000	22617000	20251000	26446000	24956000	22922000	26405000
sp|Q86TI2|DPP9_HUMAN;tr|M0R2A8|M0R2A8_HUMAN;tr|M0QXG6|M0QXG6_HUMAN;tr|M0R0I1|M0R0I1_HUMAN;tr|M0R3C4|M0R3C4_HUMAN;tr|M0R2G6|M0R2G6_HUMAN	sp|Q86TI2|DPP9_HUMAN;tr|M0R2A8|M0R2A8_HUMAN	sp|Q86TI2|DPP9_HUMAN Dipeptidyl peptidase 9 OS=Homo sapiens OX=9606 GN=DPP9 PE=1 SV=3;tr|M0R2A8|M0R2A8_HUMAN Dipeptidyl peptidase 9 OS=Homo sapiens OX=9606 GN=DPP9 PE=1 SV=1	18081000	15121000	15636000	17711000	17404000	16139000	17003000	18418000
sp|Q86U42|PABP2_HUMAN;tr|B4DEH8|B4DEH8_HUMAN;tr|G3V4T2|G3V4T2_HUMAN;tr|H0YJH9|H0YJH9_HUMAN;tr|B6RF28|B6RF28_HUMAN;sp|A6NDY0|EPAB2_HUMAN	sp|Q86U42|PABP2_HUMAN;tr|B4DEH8|B4DEH8_HUMAN;tr|G3V4T2|G3V4T2_HUMAN	sp|Q86U42|PABP2_HUMAN Polyadenylate-binding protein 2 OS=Homo sapiens OX=9606 GN=PABPN1 PE=1 SV=3;tr|B4DEH8|B4DEH8_HUMAN Polyadenylate-binding protein 2 OS=Homo sapiens OX=9606 GN=PABPN1 PE=1 SV=1;tr|G3V4T2|G3V4T2_HUMAN Polyadenylate-binding protein 2 OS=H	93535000	87355000	96086000	97515000	100800000	99623000	98616000	108410000
sp|Q86V81|THOC4_HUMAN;tr|E9PB61|E9PB61_HUMAN	sp|Q86V81|THOC4_HUMAN;tr|E9PB61|E9PB61_HUMAN	sp|Q86V81|THOC4_HUMAN THO complex subunit 4 OS=Homo sapiens OX=9606 GN=ALYREF PE=1 SV=3;tr|E9PB61|E9PB61_HUMAN THO complex subunit 4 OS=Homo sapiens OX=9606 GN=ALYREF PE=1 SV=1	400640000	401690000	376080000	428540000	426420000	368470000	454070000	430770000
sp|Q86XP3|DDX42_HUMAN;tr|A0A0A0MSJ0|A0A0A0MSJ0_HUMAN;tr|B3KTL4|B3KTL4_HUMAN;tr|B3KX23|B3KX23_HUMAN;tr|T2DQ69|T2DQ69_HUMAN;tr|B3KMI4|B3KMI4_HUMAN;tr|B3KV84|B3KV84_HUMAN;tr|J3KRE3|J3KRE3_HUMAN;tr|J3QRI2|J3QRI2_HUMAN;tr|J3KTK9|J3KTK9_HUMAN	sp|Q86XP3|DDX42_HUMAN;tr|A0A0A0MSJ0|A0A0A0MSJ0_HUMAN;tr|B3KTL4|B3KTL4_HUMAN;tr|B3KX23|B3KX23_HUMAN;tr|T2DQ69|T2DQ69_HUMAN	sp|Q86XP3|DDX42_HUMAN ATP-dependent RNA helicase DDX42 OS=Homo sapiens OX=9606 GN=DDX42 PE=1 SV=1;tr|A0A0A0MSJ0|A0A0A0MSJ0_HUMAN ATP-dependent RNA helicase DDX42 OS=Homo sapiens OX=9606 GN=DDX42 PE=1 SV=1;tr|B3KTL4|B3KTL4_HUMAN cDNA FLJ38453 fis, clone FEB	72391000	65108000	63414000	68741000	80313000	87560000	75839000	80557000
sp|Q8IVF2|AHNK2_HUMAN	sp|Q8IVF2|AHNK2_HUMAN	sp|Q8IVF2|AHNK2_HUMAN Protein AHNAK2 OS=Homo sapiens OX=9606 GN=AHNAK2 PE=1 SV=2	28051000	27055000	24103000	23984000	29942000	29862000	27316000	27694000
sp|Q8IWX8|CHERP_HUMAN;tr|J3QK89|J3QK89_HUMAN;tr|B4DPM4|B4DPM4_HUMAN;tr|Q59ET1|Q59ET1_HUMAN;tr|B4DL82|B4DL82_HUMAN	sp|Q8IWX8|CHERP_HUMAN;tr|J3QK89|J3QK89_HUMAN	sp|Q8IWX8|CHERP_HUMAN Calcium homeostasis endoplasmic reticulum protein OS=Homo sapiens OX=9606 GN=CHERP PE=1 SV=3;tr|J3QK89|J3QK89_HUMAN Calcium homeostasis endoplasmic reticulum protein OS=Homo sapiens OX=9606 GN=CHERP PE=1 SV=1	30990000	24039000	33188000	32242000	40048000	36658000	30873000	32767000
sp|Q8IX12|CCAR1_HUMAN;tr|A0A0C4DGG8|A0A0C4DGG8_HUMAN;tr|F5H1H2|F5H1H2_HUMAN;tr|F5H2E6|F5H2E6_HUMAN;tr|F5H3E1|F5H3E1_HUMAN;tr|H0YFJ7|H0YFJ7_HUMAN	sp|Q8IX12|CCAR1_HUMAN;tr|A0A0C4DGG8|A0A0C4DGG8_HUMAN;tr|F5H1H2|F5H1H2_HUMAN;tr|F5H2E6|F5H2E6_HUMAN;tr|F5H3E1|F5H3E1_HUMAN	sp|Q8IX12|CCAR1_HUMAN Cell division cycle and apoptosis regulator protein 1 OS=Homo sapiens OX=9606 GN=CCAR1 PE=1 SV=2;tr|A0A0C4DGG8|A0A0C4DGG8_HUMAN Cell division cycle and apoptosis regulator protein 1 (Fragment) OS=Homo sapiens OX=9606 GN=CCAR1 PE=1 SV=	38193000	36008000	36332000	36397000	38229000	37153000	37503000	38191000
sp|Q8N1F7|NUP93_HUMAN;tr|A8K897|A8K897_HUMAN;tr|H3BVG0|H3BVG0_HUMAN;tr|H3BM93|H3BM93_HUMAN;tr|H3BRI8|H3BRI8_HUMAN;tr|H3BV11|H3BV11_HUMAN;tr|H3BVE2|H3BVE2_HUMAN;tr|H3BMX0|H3BMX0_HUMAN;tr|H3BNN5|H3BNN5_HUMAN;tr|H3BRD9|H3BRD9_HUMAN;tr|H3BP95|H3BP95_HUMAN;tr|H3BPA9|H3BPA9_HUMAN;tr|H3BV15|H3BV15_HUMAN;tr|H3BNG7|H3BNG7_HUMAN	sp|Q8N1F7|NUP93_HUMAN;tr|A8K897|A8K897_HUMAN;tr|H3BVG0|H3BVG0_HUMAN	sp|Q8N1F7|NUP93_HUMAN Nuclear pore complex protein Nup93 OS=Homo sapiens OX=9606 GN=NUP93 PE=1 SV=2;tr|A8K897|A8K897_HUMAN Nuclear pore complex protein Nup93 OS=Homo sapiens OX=9606 PE=2 SV=1;tr|H3BVG0|H3BVG0_HUMAN Nuclear pore complex protein Nup93 OS=Hom	127820000	116180000	118340000	131210000	123180000	127760000	124850000	136490000
sp|Q8N5K1|CISD2_HUMAN;tr|D6RCF4|D6RCF4_HUMAN;tr|I3L1N9|I3L1N9_HUMAN	sp|Q8N5K1|CISD2_HUMAN;tr|D6RCF4|D6RCF4_HUMAN	sp|Q8N5K1|CISD2_HUMAN CDGSH iron-sulfur domain-containing protein 2 OS=Homo sapiens OX=9606 GN=CISD2 PE=1 SV=1;tr|D6RCF4|D6RCF4_HUMAN CDGSH iron-sulfur domain-containing protein 2 OS=Homo sapiens OX=9606 GN=CISD2 PE=1 SV=1	51504000	50249000	47299000	46973000	37648000	54232000	39843000	46155000
sp|Q8NBJ5|GT251_HUMAN;tr|Q8WUI9|Q8WUI9_HUMAN;tr|Q9H6F1|Q9H6F1_HUMAN;tr|M0QYH0|M0QYH0_HUMAN;tr|M0QX72|M0QX72_HUMAN;tr|Q6IPW8|Q6IPW8_HUMAN;tr|B3KQ10|B3KQ10_HUMAN	sp|Q8NBJ5|GT251_HUMAN	sp|Q8NBJ5|GT251_HUMAN Procollagen galactosyltransferase 1 OS=Homo sapiens OX=9606 GN=COLGALT1 PE=1 SV=1	183970000	164270000	172440000	173700000	157870000	133200000	145230000	149700000
sp|Q8NC51|PAIRB_HUMAN;tr|D3DQ70|D3DQ70_HUMAN	sp|Q8NC51|PAIRB_HUMAN;tr|D3DQ70|D3DQ70_HUMAN	sp|Q8NC51|PAIRB_HUMAN Plasminogen activator inhibitor 1 RNA-binding protein OS=Homo sapiens OX=9606 GN=SERBP1 PE=1 SV=2;tr|D3DQ70|D3DQ70_HUMAN SERPINE1 mRNA binding protein 1, isoform CRA_d OS=Homo sapiens OX=9606 GN=SERBP1 PE=4 SV=1	557430000	551580000	569540000	603730000	565320000	540300000	583950000	592980000
sp|Q8NCW5|NNRE_HUMAN;tr|B4DP80|B4DP80_HUMAN;tr|Q5T3I4|Q5T3I4_HUMAN;tr|Q6PGN4|Q6PGN4_HUMAN;tr|Q5T3I3|Q5T3I3_HUMAN	sp|Q8NCW5|NNRE_HUMAN;tr|B4DP80|B4DP80_HUMAN;tr|Q5T3I4|Q5T3I4_HUMAN	sp|Q8NCW5|NNRE_HUMAN NAD(P)H-hydrate epimerase OS=Homo sapiens OX=9606 GN=NAXE PE=1 SV=2;tr|B4DP80|B4DP80_HUMAN NAD(P)H-hydrate epimerase OS=Homo sapiens OX=9606 GN=APOA1BP PE=2 SV=1;tr|Q5T3I4|Q5T3I4_HUMAN NAD(P)H-hydrate epimerase OS=Homo sapiens OX=9606	23281000	28341000	22818000	23374000	31585000	29540000	28483000	27237000
sp|Q8TDN6|BRX1_HUMAN;tr|A0JLQ5|A0JLQ5_HUMAN;tr|B4E0B8|B4E0B8_HUMAN;tr|Q9NUW4|Q9NUW4_HUMAN	sp|Q8TDN6|BRX1_HUMAN;tr|A0JLQ5|A0JLQ5_HUMAN;tr|B4E0B8|B4E0B8_HUMAN	sp|Q8TDN6|BRX1_HUMAN Ribosome biogenesis protein BRX1 homolog OS=Homo sapiens OX=9606 GN=BRIX1 PE=1 SV=2;tr|A0JLQ5|A0JLQ5_HUMAN BXDC2 protein (Fragment) OS=Homo sapiens OX=9606 GN=BXDC2 PE=2 SV=1;tr|B4E0B8|B4E0B8_HUMAN cDNA FLJ57871, highly similar to Brix	65212000	80190000	67776000	76849000	94737000	84936000	75677000	88216000
sp|Q8TEX9|IPO4_HUMAN;tr|B3KQ33|B3KQ33_HUMAN;tr|Q59FI4|Q59FI4_HUMAN;tr|D3DS63|D3DS63_HUMAN;tr|B3KT38|B3KT38_HUMAN;tr|H0YN14|H0YN14_HUMAN;tr|B3KTB3|B3KTB3_HUMAN;tr|B3KPS9|B3KPS9_HUMAN;tr|B3KPY9|B3KPY9_HUMAN;tr|Q6I9Y8|Q6I9Y8_HUMAN;tr|B3KSQ4|B3KSQ4_HUMAN;tr|Q59H62|Q59H62_HUMAN;tr|B4DXR7|B4DXR7_HUMAN;tr|H0YMR4|H0YMR4_HUMAN;tr|H0YN07|H0YN07_HUMAN;tr|H0YLV0|H0YLV0_HUMAN;tr|H0YL92|H0YL92_HUMAN;tr|H0YK93|…	sp|Q8TEX9|IPO4_HUMAN;tr|B3KQ33|B3KQ33_HUMAN;tr|Q59FI4|Q59FI4_HUMAN;tr|D3DS63|D3DS63_HUMAN;tr|B3KT38|B3KT38_HUMAN;tr|H0YN14|H0YN14_HUMAN;tr|B3KTB3|B3KTB3_HUMAN;tr|B3KPS9|B3KPS9_HUMAN;tr|B3KPY9|B3KPY9_HUMAN;tr|Q6I9Y8|Q6I9Y8_HUMAN;tr|B3KSQ4|B3KSQ4_HUMAN;tr|Q59H62|Q59H62_HUMAN	sp|Q8TEX9|IPO4_HUMAN Importin-4 OS=Homo sapiens OX=9606 GN=IPO4 PE=1 SV=2;tr|B3KQ33|B3KQ33_HUMAN cDNA FLJ32715 fis, clone TESTI2000784, highly similar to Importin-4 OS=Homo sapiens OX=9606 PE=2 SV=1;tr|Q59FI4|Q59FI4_HUMAN Importin 4 variant (Fragment) OS=H	79392000	81514000	86264000	89672000	114560000	102360000	101960000	100440000
sp|Q8WUM4|PDC6I_HUMAN;tr|Q4W4Y1|Q4W4Y1_HUMAN;tr|B7Z5C1|B7Z5C1_HUMAN;tr|B4DHD2|B4DHD2_HUMAN;tr|C9IZF9|C9IZF9_HUMAN;tr|F8WEQ7|F8WEQ7_HUMAN;tr|F8WBR8|F8WBR8_HUMAN;tr|F8WDK9|F8WDK9_HUMAN	sp|Q8WUM4|PDC6I_HUMAN;tr|Q4W4Y1|Q4W4Y1_HUMAN;tr|B7Z5C1|B7Z5C1_HUMAN;tr|B4DHD2|B4DHD2_HUMAN	sp|Q8WUM4|PDC6I_HUMAN Programmed cell death 6-interacting protein OS=Homo sapiens OX=9606 GN=PDCD6IP PE=1 SV=1;tr|Q4W4Y1|Q4W4Y1_HUMAN Dopamine receptor interacting protein 4 OS=Homo sapiens OX=9606 GN=DRIP4 PE=2 SV=1;tr|B7Z5C1|B7Z5C1_HUMAN cDNA FLJ56126, h	752020000	704030000	709940000	645990000	795320000	795020000	719330000	753630000
sp|Q8WUY1|THEM6_HUMAN;tr|B4DWJ7|B4DWJ7_HUMAN;tr|H0YAR9|H0YAR9_HUMAN	sp|Q8WUY1|THEM6_HUMAN;tr|B4DWJ7|B4DWJ7_HUMAN	sp|Q8WUY1|THEM6_HUMAN Protein THEM6 OS=Homo sapiens OX=9606 GN=THEM6 PE=1 SV=2;tr|B4DWJ7|B4DWJ7_HUMAN cDNA FLJ54968 OS=Homo sapiens OX=9606 PE=2 SV=1	22842000	23312000	19480000	20818000	16855000	21519000	19531000	21221000
sp|Q8WVY7|UBCP1_HUMAN	sp|Q8WVY7|UBCP1_HUMAN	sp|Q8WVY7|UBCP1_HUMAN Ubiquitin-like domain-containing CTD phosphatase 1 OS=Homo sapiens OX=9606 GN=UBLCP1 PE=1 SV=2	20572000	21119000	21154000	19088000	25787000	22556000	22289000	23130000
sp|Q8WW12|PCNP_HUMAN	sp|Q8WW12|PCNP_HUMAN	sp|Q8WW12|PCNP_HUMAN PEST proteolytic signal-containing nuclear protein OS=Homo sapiens OX=9606 GN=PCNP PE=1 SV=2	34011000	38261000	37273000	36423000	51009000	45935000	43558000	45706000
sp|Q8WWM7|ATX2L_HUMAN;tr|H3BUF6|H3BUF6_HUMAN;tr|A0A024QZC0|A0A024QZC0_HUMAN;tr|A0A024QZB7|A0A024QZB7_HUMAN;tr|A0A024QZ91|A0A024QZ91_HUMAN;tr|H3BSK9|H3BSK9_HUMAN;tr|H3BRB0|H3BRB0_HUMAN;tr|A0A0C4DGL7|A0A0C4DGL7_HUMAN	sp|Q8WWM7|ATX2L_HUMAN;tr|H3BUF6|H3BUF6_HUMAN;tr|A0A024QZC0|A0A024QZC0_HUMAN;tr|A0A024QZB7|A0A024QZB7_HUMAN;tr|A0A024QZ91|A0A024QZ91_HUMAN	sp|Q8WWM7|ATX2L_HUMAN Ataxin-2-like protein OS=Homo sapiens OX=9606 GN=ATXN2L PE=1 SV=2;tr|H3BUF6|H3BUF6_HUMAN Ataxin-2-like protein OS=Homo sapiens OX=9606 GN=ATXN2L PE=1 SV=1;tr|A0A024QZC0|A0A024QZC0_HUMAN Ataxin 2-like, isoform CRA_e OS=Homo sapiens OX=	36582000	30840000	31849000	34225000	38872000	37823000	36154000	38522000
sp|Q8WX92|NELFB_HUMAN;tr|A0A0X1KG71|A0A0X1KG71_HUMAN	sp|Q8WX92|NELFB_HUMAN;tr|A0A0X1KG71|A0A0X1KG71_HUMAN	sp|Q8WX92|NELFB_HUMAN Negative elongation factor B OS=Homo sapiens OX=9606 GN=NELFB PE=1 SV=1;tr|A0A0X1KG71|A0A0X1KG71_HUMAN Negative elongation factor B OS=Homo sapiens OX=9606 GN=NELFB PE=1 SV=1	13646000	13889000	14096000	14058000	17702000	15331000	16587000	15010000
sp|Q8WX93|PALLD_HUMAN;tr|B2RTX2|B2RTX2_HUMAN;tr|Q7L8P5|Q7L8P5_HUMAN;tr|L0R8B3|L0R8B3_HUMAN;tr|Q4W5A6|Q4W5A6_HUMAN;tr|H0YA05|H0YA05_HUMAN;tr|F8WA26|F8WA26_HUMAN;tr|D6R9F5|D6R9F5_HUMAN	sp|Q8WX93|PALLD_HUMAN;tr|B2RTX2|B2RTX2_HUMAN;tr|Q7L8P5|Q7L8P5_HUMAN	sp|Q8WX93|PALLD_HUMAN Palladin OS=Homo sapiens OX=9606 GN=PALLD PE=1 SV=3;tr|B2RTX2|B2RTX2_HUMAN Palladin, cytoskeletal associated protein OS=Homo sapiens OX=9606 GN=PALLD PE=2 SV=1;tr|Q7L8P5|Q7L8P5_HUMAN Uncharacterized protein DKFZp586L0518 (Fragment) OS	23876000	26280000	27863000	28740000	27747000	29120000	27467000	28138000
sp|Q8WXF1|PSPC1_HUMAN;tr|B4DWI8|B4DWI8_HUMAN;tr|A0A024RDP4|A0A024RDP4_HUMAN;tr|X6RDA4|X6RDA4_HUMAN	sp|Q8WXF1|PSPC1_HUMAN;tr|B4DWI8|B4DWI8_HUMAN;tr|A0A024RDP4|A0A024RDP4_HUMAN;tr|X6RDA4|X6RDA4_HUMAN	sp|Q8WXF1|PSPC1_HUMAN Paraspeckle component 1 OS=Homo sapiens OX=9606 GN=PSPC1 PE=1 SV=1;tr|B4DWI8|B4DWI8_HUMAN cDNA FLJ57805, highly similar to Homo sapiens paraspeckle component 1 (PSPC1), transcript variant alpha, mRNA OS=Homo sapiens OX=9606 PE=2 SV=1;	161870000	159760000	158510000	170270000	172560000	176830000	169950000	184250000
sp|Q8WYA6|CTBL1_HUMAN;tr|A0A087WUB9|A0A087WUB9_HUMAN;tr|A2A2P1|A2A2P1_HUMAN	sp|Q8WYA6|CTBL1_HUMAN;tr|A0A087WUB9|A0A087WUB9_HUMAN	sp|Q8WYA6|CTBL1_HUMAN Beta-catenin-like protein 1 OS=Homo sapiens OX=9606 GN=CTNNBL1 PE=1 SV=1;tr|A0A087WUB9|A0A087WUB9_HUMAN Beta-catenin-like protein 1 OS=Homo sapiens OX=9606 GN=CTNNBL1 PE=1 SV=1	28470000	35111000	27663000	33788000	44119000	34817000	34959000	37873000
sp|Q92522|H1X_HUMAN	sp|Q92522|H1X_HUMAN	sp|Q92522|H1X_HUMAN Histone H1x OS=Homo sapiens OX=9606 GN=H1FX PE=1 SV=1	64179000	44780000	51103000	64337000	29867000	36366000	45612000	46458000
sp|Q92621|NU205_HUMAN;tr|B4DE72|B4DE72_HUMAN;tr|Q6P486|Q6P486_HUMAN;tr|U3KPX2|U3KPX2_HUMAN;tr|Q4VBX7|Q4VBX7_HUMAN;tr|Q6DKH1|Q6DKH1_HUMAN;tr|B4DM61|B4DM61_HUMAN	sp|Q92621|NU205_HUMAN;tr|B4DE72|B4DE72_HUMAN	sp|Q92621|NU205_HUMAN Nuclear pore complex protein Nup205 OS=Homo sapiens OX=9606 GN=NUP205 PE=1 SV=3;tr|B4DE72|B4DE72_HUMAN cDNA FLJ50078, highly similar to Nuclear pore complex protein Nup205 OS=Homo sapiens OX=9606 PE=2 SV=1	1406100000	1750800000	1583800000	1530500000	1927100000	2086700000	1529100000	1892500000
sp|Q92783|STAM1_HUMAN;tr|B2RAY1|B2RAY1_HUMAN;tr|B4DZT2|B4DZT2_HUMAN;tr|A6NMU3|A6NMU3_HUMAN;tr|C9J1E5|C9J1E5_HUMAN;sp|O75886|STAM2_HUMAN	sp|Q92783|STAM1_HUMAN;tr|B2RAY1|B2RAY1_HUMAN;tr|B4DZT2|B4DZT2_HUMAN	sp|Q92783|STAM1_HUMAN Signal transducing adapter molecule 1 OS=Homo sapiens OX=9606 GN=STAM PE=1 SV=3;tr|B2RAY1|B2RAY1_HUMAN cDNA, FLJ95184, highly similar to Homo sapiens signal transducing adaptor molecule (SH3 domain and ITAM motif) 1 (STAM), mRNA OS=Ho	133060000	140950000	108180000	128180000	129510000	138460000	119730000	142400000
sp|Q92804|RBP56_HUMAN;tr|B4E312|B4E312_HUMAN;tr|A0A075B7D9|A0A075B7D9_HUMAN;tr|A0A075B7F4|A0A075B7F4_HUMAN;tr|A0A075B7F2|A0A075B7F2_HUMAN	sp|Q92804|RBP56_HUMAN;tr|B4E312|B4E312_HUMAN;tr|A0A075B7D9|A0A075B7D9_HUMAN	sp|Q92804|RBP56_HUMAN TATA-binding protein-associated factor 2N OS=Homo sapiens OX=9606 GN=TAF15 PE=1 SV=1;tr|B4E312|B4E312_HUMAN cDNA FLJ53422, highly similar to TATA-binding protein-associated factor 2N OS=Homo sapiens OX=9606 PE=2 SV=1;tr|A0A075B7D9|A0A	69234000	67672000	60643000	68241000	90066000	102830000	81975000	86000000
sp|Q92945|FUBP2_HUMAN;tr|A0A087WTP3|A0A087WTP3_HUMAN;tr|M0R0I5|M0R0I5_HUMAN;tr|B4DV73|B4DV73_HUMAN;tr|M0QYH3|M0QYH3_HUMAN;tr|M0QXW7|M0QXW7_HUMAN;tr|M0R0C6|M0R0C6_HUMAN;tr|M0R3J3|M0R3J3_HUMAN;tr|M0QYG1|M0QYG1_HUMAN;tr|M0R251|M0R251_HUMAN;tr|M0R263|M0R263_HUMAN	sp|Q92945|FUBP2_HUMAN;tr|A0A087WTP3|A0A087WTP3_HUMAN;tr|M0R0I5|M0R0I5_HUMAN;tr|B4DV73|B4DV73_HUMAN	sp|Q92945|FUBP2_HUMAN Far upstream element-binding protein 2 OS=Homo sapiens OX=9606 GN=KHSRP PE=1 SV=4;tr|A0A087WTP3|A0A087WTP3_HUMAN Far upstream element-binding protein 2 OS=Homo sapiens OX=9606 GN=KHSRP PE=1 SV=1;tr|M0R0I5|M0R0I5_HUMAN Far upstream ele	1069200000	1005300000	947130000	1046900000	1068500000	1039900000	987440000	1049700000
sp|Q92974|ARHG2_HUMAN;tr|D3DVA5|D3DVA5_HUMAN;tr|V9GYM8|V9GYM8_HUMAN;tr|B4DJ49|B4DJ49_HUMAN;tr|B7Z977|B7Z977_HUMAN;tr|V9GZ14|V9GZ14_HUMAN;tr|V9GYG5|V9GYG5_HUMAN;tr|V9GYF5|V9GYF5_HUMAN;tr|Q5VY93|Q5VY93_HUMAN;tr|V9GYF0|V9GYF0_HUMAN	sp|Q92974|ARHG2_HUMAN;tr|D3DVA5|D3DVA5_HUMAN;tr|V9GYM8|V9GYM8_HUMAN;tr|B4DJ49|B4DJ49_HUMAN;tr|B7Z977|B7Z977_HUMAN	sp|Q92974|ARHG2_HUMAN Rho guanine nucleotide exchange factor 2 OS=Homo sapiens OX=9606 GN=ARHGEF2 PE=1 SV=4;tr|D3DVA5|D3DVA5_HUMAN Rho/rac guanine nucleotide exchange factor (GEF) 2, isoform CRA_a OS=Homo sapiens OX=9606 GN=ARHGEF2 PE=4 SV=1;tr|V9GYM8|V9GY	54883000	65118000	66959000	64848000	56445000	52766000	55258000	50943000
sp|Q969E2|SCAM4_HUMAN;tr|K7EJJ4|K7EJJ4_HUMAN;tr|C9JWM2|C9JWM2_HUMAN	sp|Q969E2|SCAM4_HUMAN;tr|K7EJJ4|K7EJJ4_HUMAN;tr|C9JWM2|C9JWM2_HUMAN	sp|Q969E2|SCAM4_HUMAN Secretory carrier-associated membrane protein 4 OS=Homo sapiens OX=9606 GN=SCAMP4 PE=1 SV=1;tr|K7EJJ4|K7EJJ4_HUMAN Secretory carrier-associated membrane protein (Fragment) OS=Homo sapiens OX=9606 GN=SCAMP4 PE=1 SV=2;tr|C9JWM2|C9JWM2_H	35623000	35821000	31739000	28780000	43948000	40904000	35338000	32312000
sp|Q96A33|CCD47_HUMAN;tr|A0A087WYW6|A0A087WYW6_HUMAN;tr|J3QR89|J3QR89_HUMAN	sp|Q96A33|CCD47_HUMAN;tr|A0A087WYW6|A0A087WYW6_HUMAN	sp|Q96A33|CCD47_HUMAN Coiled-coil domain-containing protein 47 OS=Homo sapiens OX=9606 GN=CCDC47 PE=1 SV=1;tr|A0A087WYW6|A0A087WYW6_HUMAN Coiled-coil domain-containing protein 47 OS=Homo sapiens OX=9606 GN=CCDC47 PE=1 SV=1	38598000	40308000	37872000	64459000	43281000	41809000	29618000	36021000
sp|Q96AG4|LRC59_HUMAN;tr|I3L223|I3L223_HUMAN	sp|Q96AG4|LRC59_HUMAN	sp|Q96AG4|LRC59_HUMAN Leucine-rich repeat-containing protein 59 OS=Homo sapiens OX=9606 GN=LRRC59 PE=1 SV=1	463160000	477630000	460480000	508250000	427420000	405590000	497020000	478430000
sp|Q96B26|EXOS8_HUMAN;tr|Q5JXM0|Q5JXM0_HUMAN	sp|Q96B26|EXOS8_HUMAN;tr|Q5JXM0|Q5JXM0_HUMAN	sp|Q96B26|EXOS8_HUMAN Exosome complex component RRP43 OS=Homo sapiens OX=9606 GN=EXOSC8 PE=1 SV=1;tr|Q5JXM0|Q5JXM0_HUMAN Uncharacterized protein DKFZp564C0482 OS=Homo sapiens OX=9606 GN=DKFZp564C0482 PE=4 SV=1	21728000	16175000	20347000	19396000	19399000	21813000	20239000	20670000
sp|Q96B49|TOM6_HUMAN	sp|Q96B49|TOM6_HUMAN	sp|Q96B49|TOM6_HUMAN Mitochondrial import receptor subunit TOM6 homolog OS=Homo sapiens OX=9606 GN=TOMM6 PE=1 SV=1	50271000	43081000	45140000	50799000	58028000	56755000	45353000	49724000
sp|Q96C01|F136A_HUMAN;tr|E7EQY1|E7EQY1_HUMAN;tr|B0AZT6|B0AZT6_HUMAN;tr|C9J2Y4|C9J2Y4_HUMAN;tr|C9JF51|C9JF51_HUMAN	sp|Q96C01|F136A_HUMAN;tr|E7EQY1|E7EQY1_HUMAN;tr|B0AZT6|B0AZT6_HUMAN	sp|Q96C01|F136A_HUMAN Protein FAM136A OS=Homo sapiens OX=9606 GN=FAM136A PE=1 SV=1;tr|E7EQY1|E7EQY1_HUMAN Protein FAM136A OS=Homo sapiens OX=9606 GN=FAM136A PE=1 SV=1;tr|B0AZT6|B0AZT6_HUMAN cDNA, FLJ79526 OS=Homo sapiens OX=9606 PE=2 SV=1	55374000	39203000	42105000	65468000	67327000	48099000	62634000	52135000
sp|Q96C90|PP14B_HUMAN;tr|A0A024R563|A0A024R563_HUMAN;tr|F5GXC4|F5GXC4_HUMAN;tr|F5H2U0|F5H2U0_HUMAN;tr|B5MC51|B5MC51_HUMAN	sp|Q96C90|PP14B_HUMAN;tr|A0A024R563|A0A024R563_HUMAN	sp|Q96C90|PP14B_HUMAN Protein phosphatase 1 regulatory subunit 14B OS=Homo sapiens OX=9606 GN=PPP1R14B PE=1 SV=3;tr|A0A024R563|A0A024R563_HUMAN Protein phosphatase 1, regulatory (Inhibitor) subunit 14B, isoform CRA_a OS=Homo sapiens OX=9606 GN=PPP1R14B PE=	93949000	103030000	135900000	103240000	99534000	110850000	106380000	107600000
sp|Q96CS3|FAF2_HUMAN;tr|B4E2M8|B4E2M8_HUMAN;tr|D6RBG6|D6RBG6_HUMAN	sp|Q96CS3|FAF2_HUMAN;tr|B4E2M8|B4E2M8_HUMAN	sp|Q96CS3|FAF2_HUMAN FAS-associated factor 2 OS=Homo sapiens OX=9606 GN=FAF2 PE=1 SV=2;tr|B4E2M8|B4E2M8_HUMAN cDNA FLJ61076, highly similar to UBX domain-containing protein 8 OS=Homo sapiens OX=9606 PE=2 SV=1	69437000	65003000	54415000	56471000	73447000	69113000	69886000	58927000
sp|Q96EE3|SEH1_HUMAN;tr|K7EP88|K7EP88_HUMAN;tr|K7ELV2|K7ELV2_HUMAN;tr|K7ENI5|K7ENI5_HUMAN;tr|K7EPZ5|K7EPZ5_HUMAN	sp|Q96EE3|SEH1_HUMAN;tr|K7EP88|K7EP88_HUMAN;tr|K7ELV2|K7ELV2_HUMAN;tr|K7ENI5|K7ENI5_HUMAN	sp|Q96EE3|SEH1_HUMAN Nucleoporin SEH1 OS=Homo sapiens OX=9606 GN=SEH1L PE=1 SV=3;tr|K7EP88|K7EP88_HUMAN Nucleoporin SEH1 (Fragment) OS=Homo sapiens OX=9606 GN=SEH1L PE=1 SV=1;tr|K7ELV2|K7ELV2_HUMAN Nucleoporin SEH1 (Fragment) OS=Homo sapiens OX=9606 GN=SEH	28910000	18769000	30796000	33855000	44218000	41402000	35934000	36538000
sp|Q96EK5|KBP_HUMAN;tr|A0A1B0GUA3|A0A1B0GUA3_HUMAN;tr|A0A1B0GUH6|A0A1B0GUH6_HUMAN;tr|A0A1B0GTE6|A0A1B0GTE6_HUMAN;tr|A0A0D9SFK7|A0A0D9SFK7_HUMAN;tr|A0A1B0GU96|A0A1B0GU96_HUMAN;tr|A0A1B0GV79|A0A1B0GV79_HUMAN;tr|A0A1B0GVY9|A0A1B0GVY9_HUMAN;tr|A0A1B0GW21|A0A1B0GW21_HUMAN	sp|Q96EK5|KBP_HUMAN;tr|A0A1B0GUA3|A0A1B0GUA3_HUMAN	sp|Q96EK5|KBP_HUMAN KIF1-binding protein OS=Homo sapiens OX=9606 GN=KIF1BP PE=1 SV=1;tr|A0A1B0GUA3|A0A1B0GUA3_HUMAN KIF1-binding protein OS=Homo sapiens OX=9606 GN=KIF1BP PE=1 SV=1	51637000	50587000	56639000	56891000	53099000	56635000	50303000	58005000
sp|Q96FQ6|S10AG_HUMAN	sp|Q96FQ6|S10AG_HUMAN	sp|Q96FQ6|S10AG_HUMAN Protein S100-A16 OS=Homo sapiens OX=9606 GN=S100A16 PE=1 SV=1	102100000	99602000	116880000	111380000	69725000	84343000	95194000	104280000
sp|Q96FW1|OTUB1_HUMAN;tr|J3KR44|J3KR44_HUMAN;tr|Q659F9|Q659F9_HUMAN;tr|F5H6Q1|F5H6Q1_HUMAN;tr|F5GYN4|F5GYN4_HUMAN;tr|F5GYJ8|F5GYJ8_HUMAN;tr|B4DPD5|B4DPD5_HUMAN;tr|F5H3F0|F5H3F0_HUMAN;tr|B3KUV5|B3KUV5_HUMAN;tr|B4E053|B4E053_HUMAN	sp|Q96FW1|OTUB1_HUMAN;tr|J3KR44|J3KR44_HUMAN;tr|Q659F9|Q659F9_HUMAN;tr|F5H6Q1|F5H6Q1_HUMAN;tr|F5GYN4|F5GYN4_HUMAN;tr|F5GYJ8|F5GYJ8_HUMAN;tr|B4DPD5|B4DPD5_HUMAN;tr|F5H3F0|F5H3F0_HUMAN;tr|B3KUV5|B3KUV5_HUMAN	sp|Q96FW1|OTUB1_HUMAN Ubiquitin thioesterase OTUB1 OS=Homo sapiens OX=9606 GN=OTUB1 PE=1 SV=2;tr|J3KR44|J3KR44_HUMAN Ubiquitin thioesterase OS=Homo sapiens OX=9606 GN=OTUB1 PE=1 SV=2;tr|Q659F9|Q659F9_HUMAN Ubiquitin thioesterase OS=Homo sapiens OX=9606 GN=	131000000	131030000	124660000	128100000	147150000	148240000	135710000	156700000
sp|Q96G03|PGM2_HUMAN;tr|B4DN40|B4DN40_HUMAN;tr|H0Y921|H0Y921_HUMAN;tr|Q4W5D6|Q4W5D6_HUMAN;tr|E9PD70|E9PD70_HUMAN;tr|E7ENQ8|E7ENQ8_HUMAN	sp|Q96G03|PGM2_HUMAN;tr|B4DN40|B4DN40_HUMAN	sp|Q96G03|PGM2_HUMAN Phosphoglucomutase-2 OS=Homo sapiens OX=9606 GN=PGM2 PE=1 SV=4;tr|B4DN40|B4DN40_HUMAN cDNA FLJ54368, highly similar to Phosphoglucomutase-2 (EC 5.4.2.2) OS=Homo sapiens OX=9606 PE=2 SV=1	91613000	86544000	93643000	95063000	120460000	117190000	113880000	112050000
sp|Q96HE7|ERO1A_HUMAN;tr|G3V3E6|G3V3E6_HUMAN;tr|G3V5B3|G3V5B3_HUMAN;tr|G3V2H0|G3V2H0_HUMAN;tr|G3V503|G3V503_HUMAN;tr|Q5TAE8|Q5TAE8_HUMAN;sp|Q86YB8|ERO1B_HUMAN	sp|Q96HE7|ERO1A_HUMAN	sp|Q96HE7|ERO1A_HUMAN ERO1-like protein alpha OS=Homo sapiens OX=9606 GN=ERO1A PE=1 SV=2	494500000	516190000	442910000	479370000	406150000	385070000	371860000	400530000
sp|Q96IZ0|PAWR_HUMAN;tr|H0YI16|H0YI16_HUMAN;tr|A0A0B4J260|A0A0B4J260_HUMAN;tr|H0YHP5|H0YHP5_HUMAN;tr|F8W1M8|F8W1M8_HUMAN	sp|Q96IZ0|PAWR_HUMAN;tr|H0YI16|H0YI16_HUMAN	sp|Q96IZ0|PAWR_HUMAN PRKC apoptosis WT1 regulator protein OS=Homo sapiens OX=9606 GN=PAWR PE=1 SV=1;tr|H0YI16|H0YI16_HUMAN PRKC apoptosis WT1 regulator protein (Fragment) OS=Homo sapiens OX=9606 GN=PAWR PE=1 SV=1	184200000	166010000	204650000	182800000	114750000	112210000	106560000	121750000
sp|Q96KP4|CNDP2_HUMAN;tr|B4DV28|B4DV28_HUMAN;tr|A0A024R382|A0A024R382_HUMAN;tr|J3QKT2|J3QKT2_HUMAN;tr|B4DPF1|B4DPF1_HUMAN;tr|Q9NW02|Q9NW02_HUMAN;tr|J3QR27|J3QR27_HUMAN;tr|J3QLU1|J3QLU1_HUMAN;tr|J3QKQ0|J3QKQ0_HUMAN;tr|J3QRD0|J3QRD0_HUMAN;tr|J3QRA8|J3QRA8_HUMAN;tr|J3KSV5|J3KSV5_HUMAN;tr|A0A087WYZ1|A0A087WYZ1_HUMAN;tr|J3QQN6|J3QQN6_HUMAN;tr|J3QL02|J3QL02_HUMAN;tr|Q9NUV1|Q9NUV1_HUMAN;tr|Q9H7K8|Q9H7K8…	sp|Q96KP4|CNDP2_HUMAN;tr|B4DV28|B4DV28_HUMAN;tr|A0A024R382|A0A024R382_HUMAN;tr|J3QKT2|J3QKT2_HUMAN;tr|B4DPF1|B4DPF1_HUMAN	sp|Q96KP4|CNDP2_HUMAN Cytosolic non-specific dipeptidase OS=Homo sapiens OX=9606 GN=CNDP2 PE=1 SV=2;tr|B4DV28|B4DV28_HUMAN cDNA FLJ54170, highly similar to Cytosolic nonspecific dipeptidase OS=Homo sapiens OX=9606 PE=2 SV=1;tr|A0A024R382|A0A024R382_HUMAN C	294490000	278880000	265570000	270690000	276950000	262190000	260110000	267010000
sp|Q96N66|MBOA7_HUMAN;tr|B4DDH8|B4DDH8_HUMAN;tr|A9C4B8|A9C4B8_HUMAN;tr|C9J4E9|C9J4E9_HUMAN;tr|A0A0G2JNX6|A0A0G2JNX6_HUMAN;tr|M0R1Z5|M0R1Z5_HUMAN;tr|F8WD95|F8WD95_HUMAN;tr|H7C2M4|H7C2M4_HUMAN	sp|Q96N66|MBOA7_HUMAN;tr|B4DDH8|B4DDH8_HUMAN;tr|A9C4B8|A9C4B8_HUMAN	sp|Q96N66|MBOA7_HUMAN Lysophospholipid acyltransferase 7 OS=Homo sapiens OX=9606 GN=MBOAT7 PE=1 SV=2;tr|B4DDH8|B4DDH8_HUMAN cDNA FLJ55184, highly similar to Homo sapiens leukocyte receptor cluster (LRC) member 4 (LENG4), mRNA OS=Homo sapiens OX=9606 PE=2 S	152290000	139460000	151350000	132590000	98132000	128430000	122280000	129760000
sp|Q96N67|DOCK7_HUMAN;tr|A0A1B0GUE9|A0A1B0GUE9_HUMAN;tr|A0A1B0GVW2|A0A1B0GVW2_HUMAN;tr|A0A0U1RQT6|A0A0U1RQT6_HUMAN;tr|A0A0C4DGY6|A0A0C4DGY6_HUMAN;tr|B3KRG0|B3KRG0_HUMAN;tr|B4DSH0|B4DSH0_HUMAN;tr|A0A1B0GWE0|A0A1B0GWE0_HUMAN	sp|Q96N67|DOCK7_HUMAN;tr|A0A1B0GUE9|A0A1B0GUE9_HUMAN;tr|A0A1B0GVW2|A0A1B0GVW2_HUMAN	sp|Q96N67|DOCK7_HUMAN Dedicator of cytokinesis protein 7 OS=Homo sapiens OX=9606 GN=DOCK7 PE=1 SV=4;tr|A0A1B0GUE9|A0A1B0GUE9_HUMAN Dedicator of cytokinesis protein 7 OS=Homo sapiens OX=9606 GN=DOCK7 PE=1 SV=1;tr|A0A1B0GVW2|A0A1B0GVW2_HUMAN Dedicator of cyt	24037000	19718000	24622000	22620000	24841000	27236000	22846000	21804000
sp|Q96P70|IPO9_HUMAN	sp|Q96P70|IPO9_HUMAN	sp|Q96P70|IPO9_HUMAN Importin-9 OS=Homo sapiens OX=9606 GN=IPO9 PE=1 SV=3	87539000	76283000	92229000	78747000	70098000	93336000	89471000	91614000
sp|Q96QK1|VPS35_HUMAN;tr|Q53FR4|Q53FR4_HUMAN;tr|Q5HYM2|Q5HYM2_HUMAN;tr|I3L4S0|I3L4S0_HUMAN;tr|A0A1W2PP10|A0A1W2PP10_HUMAN;tr|I3L4P4|I3L4P4_HUMAN	sp|Q96QK1|VPS35_HUMAN;tr|Q53FR4|Q53FR4_HUMAN;tr|Q5HYM2|Q5HYM2_HUMAN	sp|Q96QK1|VPS35_HUMAN Vacuolar protein sorting-associated protein 35 OS=Homo sapiens OX=9606 GN=VPS35 PE=1 SV=2;tr|Q53FR4|Q53FR4_HUMAN Vacuolar protein sorting 35 variant (Fragment) OS=Homo sapiens OX=9606 PE=2 SV=1;tr|Q5HYM2|Q5HYM2_HUMAN Uncharacterized p	200530000	212680000	204520000	202020000	203010000	190470000	196770000	195130000
sp|Q96RS6|NUDC1_HUMAN;tr|E5RGX7|E5RGX7_HUMAN	sp|Q96RS6|NUDC1_HUMAN	sp|Q96RS6|NUDC1_HUMAN NudC domain-containing protein 1 OS=Homo sapiens OX=9606 GN=NUDCD1 PE=1 SV=2	323230000	300040000	297680000	296040000	322090000	314740000	296990000	323440000
sp|Q96SB4|SRPK1_HUMAN;tr|H3BLV9|H3BLV9_HUMAN;tr|A0A024RCU9|A0A024RCU9_HUMAN;tr|A8K8B2|A8K8B2_HUMAN;tr|D6RBM8|D6RBM8_HUMAN;tr|H7C5L6|H7C5L6_HUMAN;tr|H0Y932|H0Y932_HUMAN;tr|D6RBF8|D6RBF8_HUMAN;tr|C9J2M4|C9J2M4_HUMAN;tr|H7C521|H7C521_HUMAN;tr|C9JWF7|C9JWF7_HUMAN;tr|A8MPP7|A8MPP7_HUMAN;tr|A8MPY5|A8MPY5_HUMAN;sp|Q9UPE1|SRPK3_HUMAN;tr|E7ETV6|E7ETV6_HUMAN;tr|Q59GF4|Q59GF4_HUMAN	sp|Q96SB4|SRPK1_HUMAN;tr|H3BLV9|H3BLV9_HUMAN;tr|A0A024RCU9|A0A024RCU9_HUMAN;tr|A8K8B2|A8K8B2_HUMAN	sp|Q96SB4|SRPK1_HUMAN SRSF protein kinase 1 OS=Homo sapiens OX=9606 GN=SRPK1 PE=1 SV=2;tr|H3BLV9|H3BLV9_HUMAN SRSF protein kinase 1 (Fragment) OS=Homo sapiens OX=9606 GN=SRPK1 PE=1 SV=1;tr|A0A024RCU9|A0A024RCU9_HUMAN SFRS protein kinase 1, isoform CRA_e OS	108750000	108240000	68931000	107780000	133040000	130280000	151500000	143780000
sp|Q96T51|RUFY1_HUMAN;tr|A8K7B1|A8K7B1_HUMAN;tr|H0YAC8|H0YAC8_HUMAN;tr|B3KSL1|B3KSL1_HUMAN;tr|H0Y9Y8|H0Y9Y8_HUMAN;tr|J3KPP6|J3KPP6_HUMAN	sp|Q96T51|RUFY1_HUMAN;tr|A8K7B1|A8K7B1_HUMAN	sp|Q96T51|RUFY1_HUMAN RUN and FYVE domain-containing protein 1 OS=Homo sapiens OX=9606 GN=RUFY1 PE=1 SV=2;tr|A8K7B1|A8K7B1_HUMAN cDNA FLJ78384, highly similar to Homo sapiens RUN and FYVE domain containing 1 (RUFY1), mRNA OS=Homo sapiens OX=9606 PE=2 SV=1	17143000	15370000	14837000	18056000	15897000	13626000	15993000	17363000
sp|Q96T76|MMS19_HUMAN;tr|Q5T454|Q5T454_HUMAN;tr|H0Y746|H0Y746_HUMAN;tr|H7C1W5|H7C1W5_HUMAN;tr|H0Y7V3|H0Y7V3_HUMAN;tr|F8WCH8|F8WCH8_HUMAN;tr|B0QZ77|B0QZ77_HUMAN;tr|O43410|O43410_HUMAN;tr|H7C0A9|H7C0A9_HUMAN	sp|Q96T76|MMS19_HUMAN	sp|Q96T76|MMS19_HUMAN MMS19 nucleotide excision repair protein homolog OS=Homo sapiens OX=9606 GN=MMS19 PE=1 SV=2	65159000	60044000	55958000	64200000	71359000	74814000	76602000	71823000
sp|Q99426|TBCB_HUMAN;tr|K7EP07|K7EP07_HUMAN;tr|K7EK42|K7EK42_HUMAN;tr|K7EL99|K7EL99_HUMAN;tr|K7EQH0|K7EQH0_HUMAN;tr|K7ER04|K7ER04_HUMAN	sp|Q99426|TBCB_HUMAN;tr|K7EP07|K7EP07_HUMAN;tr|K7EK42|K7EK42_HUMAN	sp|Q99426|TBCB_HUMAN Tubulin-folding cofactor B OS=Homo sapiens OX=9606 GN=TBCB PE=1 SV=2;tr|K7EP07|K7EP07_HUMAN Tubulin-folding cofactor B (Fragment) OS=Homo sapiens OX=9606 GN=TBCB PE=1 SV=8;tr|K7EK42|K7EK42_HUMAN Tubulin-folding cofactor B OS=Homo sapie	68034000	63999000	60946000	55150000	55653000	57661000	56582000	51679000
sp|Q99460|PSMD1_HUMAN;tr|B2R6D0|B2R6D0_HUMAN;tr|A0A087WW66|A0A087WW66_HUMAN;tr|Q05CW6|Q05CW6_HUMAN;tr|Q05BX4|Q05BX4_HUMAN;tr|C9J9M4|C9J9M4_HUMAN;tr|H7BZR6|H7BZR6_HUMAN;tr|H7C378|H7C378_HUMAN;tr|F8WCE3|F8WCE3_HUMAN	sp|Q99460|PSMD1_HUMAN;tr|B2R6D0|B2R6D0_HUMAN;tr|A0A087WW66|A0A087WW66_HUMAN;tr|Q05CW6|Q05CW6_HUMAN;tr|Q05BX4|Q05BX4_HUMAN	sp|Q99460|PSMD1_HUMAN 26S proteasome non-ATPase regulatory subunit 1 OS=Homo sapiens OX=9606 GN=PSMD1 PE=1 SV=2;tr|B2R6D0|B2R6D0_HUMAN 26S proteasome non-ATPase regulatory subunit 1 OS=Homo sapiens OX=9606 PE=2 SV=1;tr|A0A087WW66|A0A087WW66_HUMAN 26S prote	487880000	488770000	478730000	483190000	480340000	495400000	437270000	423920000
sp|Q99471|PFD5_HUMAN;tr|H3BPF6|H3BPF6_HUMAN;tr|H3BMQ1|H3BMQ1_HUMAN;tr|F8VNW6|F8VNW6_HUMAN;tr|F8VQZ2|F8VQZ2_HUMAN	sp|Q99471|PFD5_HUMAN;tr|H3BPF6|H3BPF6_HUMAN;tr|H3BMQ1|H3BMQ1_HUMAN	sp|Q99471|PFD5_HUMAN Prefoldin subunit 5 OS=Homo sapiens OX=9606 GN=PFDN5 PE=1 SV=2;tr|H3BPF6|H3BPF6_HUMAN Prefoldin subunit 5 (Fragment) OS=Homo sapiens OX=9606 GN=PFDN5 PE=1 SV=1;tr|H3BMQ1|H3BMQ1_HUMAN Prefoldin subunit 5 OS=Homo sapiens OX=9606 GN=PFDN5	74572000	81801000	80603000	84653000	79814000	80636000	75160000	73809000
sp|Q99829|CPNE1_HUMAN;tr|B0QZ18|B0QZ18_HUMAN;tr|A6PVH9|A6PVH9_HUMAN;tr|F2Z2V0|F2Z2V0_HUMAN;tr|Q59EI4|Q59EI4_HUMAN;tr|E7ENH5|E7ENH5_HUMAN;tr|Q5JX56|Q5JX56_HUMAN;tr|Q5JX58|Q5JX58_HUMAN;tr|Q5JX59|Q5JX59_HUMAN;tr|Q5JX60|Q5JX60_HUMAN;tr|Q5JX44|Q5JX44_HUMAN;tr|Q5JX45|Q5JX45_HUMAN;tr|Q5JX55|Q5JX55_HUMAN;tr|Q5JX54|Q5JX54_HUMAN;tr|Q5JX61|Q5JX61_HUMAN;tr|Q5JX52|Q5JX52_HUMAN;tr|Q5JX57|Q5JX57_HUMAN;tr|E7EV27…	sp|Q99829|CPNE1_HUMAN;tr|B0QZ18|B0QZ18_HUMAN;tr|A6PVH9|A6PVH9_HUMAN;tr|F2Z2V0|F2Z2V0_HUMAN;tr|Q59EI4|Q59EI4_HUMAN;tr|E7ENH5|E7ENH5_HUMAN;tr|Q5JX56|Q5JX56_HUMAN;tr|Q5JX58|Q5JX58_HUMAN;tr|Q5JX59|Q5JX59_HUMAN;tr|Q5JX60|Q5JX60_HUMAN;tr|Q5JX44|Q5JX44_HUMAN;tr|Q5JX45|Q5JX45_HUMAN	sp|Q99829|CPNE1_HUMAN Copine-1 OS=Homo sapiens OX=9606 GN=CPNE1 PE=1 SV=1;tr|B0QZ18|B0QZ18_HUMAN Copine-1 OS=Homo sapiens OX=9606 GN=CPNE1 PE=1 SV=1;tr|A6PVH9|A6PVH9_HUMAN Copine-1 OS=Homo sapiens OX=9606 GN=CPNE1 PE=1 SV=1;tr|F2Z2V0|F2Z2V0_HUMAN Copine-1	279450000	327530000	285140000	299220000	233660000	216110000	228810000	199550000
sp|Q9BPX3|CND3_HUMAN;tr|Q6NUR1|Q6NUR1_HUMAN;tr|H0Y9Z8|H0Y9Z8_HUMAN;tr|D6RA93|D6RA93_HUMAN	sp|Q9BPX3|CND3_HUMAN;tr|Q6NUR1|Q6NUR1_HUMAN	sp|Q9BPX3|CND3_HUMAN Condensin complex subunit 3 OS=Homo sapiens OX=9606 GN=NCAPG PE=1 SV=1;tr|Q6NUR1|Q6NUR1_HUMAN Non-SMC condensin I complex, subunit G OS=Homo sapiens OX=9606 GN=NCAPG PE=2 SV=1	60301000	62400000	59670000	56284000	74664000	78351000	64015000	68019000
sp|Q9BQ61|TRIR_HUMAN;tr|B2RE11|B2RE11_HUMAN;tr|K7EN60|K7EN60_HUMAN;tr|K7ELS0|K7ELS0_HUMAN;tr|K7ERU7|K7ERU7_HUMAN	sp|Q9BQ61|TRIR_HUMAN;tr|B2RE11|B2RE11_HUMAN;tr|K7EN60|K7EN60_HUMAN	sp|Q9BQ61|TRIR_HUMAN Telomerase RNA component interacting RNase OS=Homo sapiens OX=9606 GN=TRIR PE=1 SV=1;tr|B2RE11|B2RE11_HUMAN cDNA, FLJ96865 OS=Homo sapiens OX=9606 PE=2 SV=1;tr|K7EN60|K7EN60_HUMAN Telomerase RNA component-interacting RNase OS=Homo sapi	38616000	39117000	44441000	45270000	46266000	40928000	42640000	49581000
sp|Q9BQE3|TBA1C_HUMAN;tr|F5H5D3|F5H5D3_HUMAN;tr|B7Z1K5|B7Z1K5_HUMAN;tr|Q53GA7|Q53GA7_HUMAN;tr|A0A1W2PQM2|A0A1W2PQM2_HUMAN;tr|Q8N532|Q8N532_HUMAN	sp|Q9BQE3|TBA1C_HUMAN;tr|F5H5D3|F5H5D3_HUMAN;tr|B7Z1K5|B7Z1K5_HUMAN;tr|Q53GA7|Q53GA7_HUMAN;tr|A0A1W2PQM2|A0A1W2PQM2_HUMAN;tr|Q8N532|Q8N532_HUMAN	sp|Q9BQE3|TBA1C_HUMAN Tubulin alpha-1C chain OS=Homo sapiens OX=9606 GN=TUBA1C PE=1 SV=1;tr|F5H5D3|F5H5D3_HUMAN Tubulin alpha chain OS=Homo sapiens OX=9606 GN=TUBA1C PE=1 SV=1;tr|B7Z1K5|B7Z1K5_HUMAN Tubulin alpha chain OS=Homo sapiens OX=9606 PE=2 SV=1;tr|	15687000000	15476000000	13978000000	14158000000	15527000000	16082000000	15547000000	15500000000
sp|Q9BQG0|MBB1A_HUMAN;tr|I3L1L3|I3L1L3_HUMAN;tr|B4DZZ1|B4DZZ1_HUMAN;tr|B4DE42|B4DE42_HUMAN;tr|I3L2H8|I3L2H8_HUMAN;tr|B4DWP5|B4DWP5_HUMAN	sp|Q9BQG0|MBB1A_HUMAN;tr|I3L1L3|I3L1L3_HUMAN;tr|B4DZZ1|B4DZZ1_HUMAN	sp|Q9BQG0|MBB1A_HUMAN Myb-binding protein 1A OS=Homo sapiens OX=9606 GN=MYBBP1A PE=1 SV=2;tr|I3L1L3|I3L1L3_HUMAN Myb-binding protein 1A (Fragment) OS=Homo sapiens OX=9606 GN=MYBBP1A PE=1 SV=1;tr|B4DZZ1|B4DZZ1_HUMAN cDNA FLJ57836, highly similar to Myb-bind	43661000	59032000	74538000	83361000	51230000	60857000	83372000	62506000
sp|Q9BS26|ERP44_HUMAN	sp|Q9BS26|ERP44_HUMAN	sp|Q9BS26|ERP44_HUMAN Endoplasmic reticulum resident protein 44 OS=Homo sapiens OX=9606 GN=ERP44 PE=1 SV=1	195710000	188630000	178880000	169570000	199780000	174260000	163590000	170880000
sp|Q9BTE1|DCTN5_HUMAN;tr|B4DS97|B4DS97_HUMAN;tr|H3BR94|H3BR94_HUMAN;tr|H3BUD2|H3BUD2_HUMAN;tr|H3BS05|H3BS05_HUMAN	sp|Q9BTE1|DCTN5_HUMAN;tr|B4DS97|B4DS97_HUMAN;tr|H3BR94|H3BR94_HUMAN;tr|H3BUD2|H3BUD2_HUMAN;tr|H3BS05|H3BS05_HUMAN	sp|Q9BTE1|DCTN5_HUMAN Dynactin subunit 5 OS=Homo sapiens OX=9606 GN=DCTN5 PE=1 SV=1;tr|B4DS97|B4DS97_HUMAN cDNA FLJ57579, highly similar to Dynactin subunit 5 OS=Homo sapiens OX=9606 PE=2 SV=1;tr|H3BR94|H3BR94_HUMAN Dynactin subunit 5 OS=Homo sapiens OX=96	9402900	7599200	13009000	12526000	8394000	8465700	7929400	8533900
sp|Q9BTW9|TBCD_HUMAN;tr|J3KR97|J3KR97_HUMAN;tr|I6L959|I6L959_HUMAN;tr|B4DE53|B4DE53_HUMAN;tr|A0A0J9YWI5|A0A0J9YWI5_HUMAN;tr|A0A0J9YVR1|A0A0J9YVR1_HUMAN;tr|I3L439|I3L439_HUMAN;tr|I3L0V3|I3L0V3_HUMAN;tr|I3L163|I3L163_HUMAN;tr|I3L500|I3L500_HUMAN;tr|I3L120|I3L120_HUMAN;tr|A0A0J9YXU4|A0A0J9YXU4_HUMAN;tr|A0A0J9YVU1|A0A0J9YVU1_HUMAN;tr|I3L4D2|I3L4D2_HUMAN;tr|I3L3H4|I3L3H4_HUMAN;tr|I3L131|I3L131_HUMAN;t…	sp|Q9BTW9|TBCD_HUMAN;tr|J3KR97|J3KR97_HUMAN;tr|I6L959|I6L959_HUMAN;tr|B4DE53|B4DE53_HUMAN	sp|Q9BTW9|TBCD_HUMAN Tubulin-specific chaperone D OS=Homo sapiens OX=9606 GN=TBCD PE=1 SV=2;tr|J3KR97|J3KR97_HUMAN Tubulin-specific chaperone D OS=Homo sapiens OX=9606 GN=TBCD PE=1 SV=1;tr|I6L959|I6L959_HUMAN TBCD protein OS=Homo sapiens OX=9606 GN=TBCD PE	62585000	62141000	54970000	66885000	56148000	60998000	63028000	55768000
sp|Q9BUF5|TBB6_HUMAN;tr|B4DP54|B4DP54_HUMAN;tr|K7ESM5|K7ESM5_HUMAN;tr|B3KS31|B3KS31_HUMAN;tr|B4E386|B4E386_HUMAN;tr|K7EL29|K7EL29_HUMAN;tr|K7ESQ3|K7ESQ3_HUMAN;tr|K7EQT3|K7EQT3_HUMAN;tr|K7EJ64|K7EJ64_HUMAN;tr|K7ERA8|K7ERA8_HUMAN;tr|K7EJZ4|K7EJZ4_HUMAN;tr|K7EN98|K7EN98_HUMAN;tr|K7EPE5|K7EPE5_HUMAN;tr|K7ES63|K7ES63_HUMAN	sp|Q9BUF5|TBB6_HUMAN;tr|B4DP54|B4DP54_HUMAN;tr|K7ESM5|K7ESM5_HUMAN;tr|B3KS31|B3KS31_HUMAN;tr|B4E386|B4E386_HUMAN	sp|Q9BUF5|TBB6_HUMAN Tubulin beta-6 chain OS=Homo sapiens OX=9606 GN=TUBB6 PE=1 SV=1;tr|B4DP54|B4DP54_HUMAN Tubulin beta chain OS=Homo sapiens OX=9606 PE=2 SV=1;tr|K7ESM5|K7ESM5_HUMAN Tubulin beta chain (Fragment) OS=Homo sapiens OX=9606 GN=TUBB6 PE=1 SV=1	421240000	432220000	410390000	412620000	424480000	456910000	416050000	404480000
sp|Q9BVC6|TM109_HUMAN;tr|B2R9T9|B2R9T9_HUMAN;tr|B4E1S3|B4E1S3_HUMAN	sp|Q9BVC6|TM109_HUMAN;tr|B2R9T9|B2R9T9_HUMAN	sp|Q9BVC6|TM109_HUMAN Transmembrane protein 109 OS=Homo sapiens OX=9606 GN=TMEM109 PE=1 SV=1;tr|B2R9T9|B2R9T9_HUMAN cDNA, FLJ94551 OS=Homo sapiens OX=9606 PE=2 SV=1	79086000	266960000	154520000	112970000	78490000	66618000	101870000	55560000
sp|Q9BVG4|PBDC1_HUMAN;tr|Q9P0N4|Q9P0N4_HUMAN;tr|A6NDF3|A6NDF3_HUMAN	sp|Q9BVG4|PBDC1_HUMAN;tr|Q9P0N4|Q9P0N4_HUMAN;tr|A6NDF3|A6NDF3_HUMAN	sp|Q9BVG4|PBDC1_HUMAN Protein PBDC1 OS=Homo sapiens OX=9606 GN=PBDC1 PE=1 SV=1;tr|Q9P0N4|Q9P0N4_HUMAN HSPC245 OS=Homo sapiens OX=9606 PE=2 SV=1;tr|A6NDF3|A6NDF3_HUMAN Protein PBDC1 OS=Homo sapiens OX=9606 GN=PBDC1 PE=1 SV=2	31589000	31757000	34836000	40119000	31419000	33209000	32830000	36469000
sp|Q9BXP5|SRRT_HUMAN;tr|H7C3A1|H7C3A1_HUMAN;tr|Q7Z4Y3|Q7Z4Y3_HUMAN;tr|H7C1K0|H7C1K0_HUMAN;tr|A0A286YEP7|A0A286YEP7_HUMAN;tr|H7C0U8|H7C0U8_HUMAN;tr|A0A0A0MSP6|A0A0A0MSP6_HUMAN	sp|Q9BXP5|SRRT_HUMAN;tr|H7C3A1|H7C3A1_HUMAN	sp|Q9BXP5|SRRT_HUMAN Serrate RNA effector molecule homolog OS=Homo sapiens OX=9606 GN=SRRT PE=1 SV=1;tr|H7C3A1|H7C3A1_HUMAN Serrate RNA effector molecule homolog (Fragment) OS=Homo sapiens OX=9606 GN=SRRT PE=1 SV=1	95578000	91781000	92734000	86810000	99512000	99298000	91889000	99090000
sp|Q9BY77|PDIP3_HUMAN;tr|Q96DI9|Q96DI9_HUMAN;tr|F6VRR5|F6VRR5_HUMAN;tr|B4E0L0|B4E0L0_HUMAN;tr|F8WCX5|F8WCX5_HUMAN;tr|B4DMM2|B4DMM2_HUMAN;tr|Q8WUT1|Q8WUT1_HUMAN;tr|Q659C6|Q659C6_HUMAN;tr|B4DSH9|B4DSH9_HUMAN;tr|Q6R954|Q6R954_HUMAN;tr|F8WEE2|F8WEE2_HUMAN	sp|Q9BY77|PDIP3_HUMAN;tr|Q96DI9|Q96DI9_HUMAN;tr|F6VRR5|F6VRR5_HUMAN;tr|B4E0L0|B4E0L0_HUMAN;tr|F8WCX5|F8WCX5_HUMAN	sp|Q9BY77|PDIP3_HUMAN Polymerase delta-interacting protein 3 OS=Homo sapiens OX=9606 GN=POLDIP3 PE=1 SV=2;tr|Q96DI9|Q96DI9_HUMAN POLDIP3 protein (Fragment) OS=Homo sapiens OX=9606 GN=POLDIP3 PE=2 SV=2;tr|F6VRR5|F6VRR5_HUMAN Polymerase delta-interacting pro	28380000	24344000	27967000	25474000	20861000	25214000	26016000	23851000
sp|Q9C005|DPY30_HUMAN;tr|B4DIS3|B4DIS3_HUMAN	sp|Q9C005|DPY30_HUMAN;tr|B4DIS3|B4DIS3_HUMAN	sp|Q9C005|DPY30_HUMAN Protein dpy-30 homolog OS=Homo sapiens OX=9606 GN=DPY30 PE=1 SV=1;tr|B4DIS3|B4DIS3_HUMAN Dpy-30-like protein, isoform CRA_b OS=Homo sapiens OX=9606 GN=LOC84661 PE=2 SV=1	42055000	46017000	51115000	65620000	48668000	51703000	38376000	38755000
sp|Q9GZT3|SLIRP_HUMAN;tr|A0A087WUN7|A0A087WUN7_HUMAN;tr|H0YJ40|H0YJ40_HUMAN;tr|G3V4X6|G3V4X6_HUMAN;tr|G3V2S9|G3V2S9_HUMAN;tr|H0YJW7|H0YJW7_HUMAN;tr|H0YJI1|H0YJI1_HUMAN;tr|H0YJ07|H0YJ07_HUMAN;tr|H0YJU7|H0YJU7_HUMAN	sp|Q9GZT3|SLIRP_HUMAN;tr|A0A087WUN7|A0A087WUN7_HUMAN;tr|H0YJ40|H0YJ40_HUMAN;tr|G3V4X6|G3V4X6_HUMAN;tr|G3V2S9|G3V2S9_HUMAN;tr|H0YJW7|H0YJW7_HUMAN	sp|Q9GZT3|SLIRP_HUMAN SRA stem-loop-interacting RNA-binding protein, mitochondrial OS=Homo sapiens OX=9606 GN=SLIRP PE=1 SV=1;tr|A0A087WUN7|A0A087WUN7_HUMAN SRA stem-loop-interacting RNA-binding protein, mitochondrial OS=Homo sapiens OX=9606 GN=SLIRP PE=1	118890000	104100000	106600000	110230000	143020000	122560000	129750000	123360000
sp|Q9H074|PAIP1_HUMAN;tr|D6REB4|D6REB4_HUMAN;tr|D6R9H8|D6R9H8_HUMAN	sp|Q9H074|PAIP1_HUMAN;tr|D6REB4|D6REB4_HUMAN	sp|Q9H074|PAIP1_HUMAN Polyadenylate-binding protein-interacting protein 1 OS=Homo sapiens OX=9606 GN=PAIP1 PE=1 SV=1;tr|D6REB4|D6REB4_HUMAN Polyadenylate-binding protein-interacting protein 1 OS=Homo sapiens OX=9606 GN=PAIP1 PE=1 SV=1	36272000	36345000	32368000	22866000	34185000	32812000	30617000	35667000
sp|Q9H0B6|KLC2_HUMAN;tr|A8MZ87|A8MZ87_HUMAN;tr|E9PI24|E9PI24_HUMAN;tr|E9PP09|E9PP09_HUMAN;tr|C9JHT2|C9JHT2_HUMAN;tr|E9PM83|E9PM83_HUMAN;tr|E9PQ02|E9PQ02_HUMAN;tr|A8MX29|A8MX29_HUMAN	sp|Q9H0B6|KLC2_HUMAN;tr|A8MZ87|A8MZ87_HUMAN	sp|Q9H0B6|KLC2_HUMAN Kinesin light chain 2 OS=Homo sapiens OX=9606 GN=KLC2 PE=1 SV=1;tr|A8MZ87|A8MZ87_HUMAN Kinesin light chain 2 OS=Homo sapiens OX=9606 GN=KLC2 PE=1 SV=1	33314000	29713000	32678000	32765000	26747000	32477000	25707000	29558000
sp|Q9H0U4|RAB1B_HUMAN;tr|Q6FIG4|Q6FIG4_HUMAN;tr|E9PLD0|E9PLD0_HUMAN;tr|Q9H1C9|Q9H1C9_HUMAN;sp|Q92928|RAB1C_HUMAN;tr|Q92927|Q92927_HUMAN	sp|Q9H0U4|RAB1B_HUMAN;tr|Q6FIG4|Q6FIG4_HUMAN;tr|E9PLD0|E9PLD0_HUMAN;tr|Q9H1C9|Q9H1C9_HUMAN	sp|Q9H0U4|RAB1B_HUMAN Ras-related protein Rab-1B OS=Homo sapiens OX=9606 GN=RAB1B PE=1 SV=1;tr|Q6FIG4|Q6FIG4_HUMAN RAB1B protein OS=Homo sapiens OX=9606 GN=RAB1B PE=2 SV=1;tr|E9PLD0|E9PLD0_HUMAN Ras-related protein Rab-1B OS=Homo sapiens OX=9606 GN=RAB1B P	155090000	148550000	134310000	162090000	152280000	160360000	122380000	147910000
sp|Q9H1E3|NUCKS_HUMAN;tr|Q6IA16|Q6IA16_HUMAN;tr|B4DTY3|B4DTY3_HUMAN;tr|Q8WYF8|Q8WYF8_HUMAN	sp|Q9H1E3|NUCKS_HUMAN;tr|Q6IA16|Q6IA16_HUMAN;tr|B4DTY3|B4DTY3_HUMAN	sp|Q9H1E3|NUCKS_HUMAN Nuclear ubiquitous casein and cyclin-dependent kinase substrate 1 OS=Homo sapiens OX=9606 GN=NUCKS1 PE=1 SV=1;tr|Q6IA16|Q6IA16_HUMAN NUCKS protein OS=Homo sapiens OX=9606 GN=NUCKS PE=2 SV=1;tr|B4DTY3|B4DTY3_HUMAN cDNA FLJ61403, highly	178150000	140670000	201570000	201480000	158190000	122900000	132620000	142330000
sp|Q9H299|SH3L3_HUMAN;tr|Q86Z22|Q86Z22_HUMAN;tr|D3DPK5|D3DPK5_HUMAN;tr|Q5T123|Q5T123_HUMAN	sp|Q9H299|SH3L3_HUMAN;tr|Q86Z22|Q86Z22_HUMAN;tr|D3DPK5|D3DPK5_HUMAN;tr|Q5T123|Q5T123_HUMAN	sp|Q9H299|SH3L3_HUMAN SH3 domain-binding glutamic acid-rich-like protein 3 OS=Homo sapiens OX=9606 GN=SH3BGRL3 PE=1 SV=1;tr|Q86Z22|Q86Z22_HUMAN Epididymis secretory protein Li 297 OS=Homo sapiens OX=9606 GN=HEL-S-297 PE=2 SV=1;tr|D3DPK5|D3DPK5_HUMAN SH3 do	581100000	573040000	618640000	522490000	363230000	448420000	586300000	433960000
sp|Q9H2G2|SLK_HUMAN;tr|B4DZC9|B4DZC9_HUMAN	sp|Q9H2G2|SLK_HUMAN;tr|B4DZC9|B4DZC9_HUMAN	sp|Q9H2G2|SLK_HUMAN STE20-like serine/threonine-protein kinase OS=Homo sapiens OX=9606 GN=SLK PE=1 SV=1;tr|B4DZC9|B4DZC9_HUMAN cDNA FLJ61681, highly similar to STE20-like serine/threonine-protein kinase (EC2.7.11.1) (Fragment) OS=Homo sapiens OX=9606 PE=2	85511000	82199000	78433000	89521000	94901000	84390000	88303000	97998000
sp|Q9H2M9|RBGPR_HUMAN;tr|B3KNG8|B3KNG8_HUMAN;tr|H7C4Y9|H7C4Y9_HUMAN	sp|Q9H2M9|RBGPR_HUMAN;tr|B3KNG8|B3KNG8_HUMAN	sp|Q9H2M9|RBGPR_HUMAN Rab3 GTPase-activating protein non-catalytic subunit OS=Homo sapiens OX=9606 GN=RAB3GAP2 PE=1 SV=1;tr|B3KNG8|B3KNG8_HUMAN cDNA FLJ14579 fis, clone NT2RM4001203, highly similar to Rab3 GTPase-activating protein non-catalytic subunit OS	11638000	11746000	11892000	10419000	12016000	10964000	11050000	13976000
sp|Q9H2U2|IPYR2_HUMAN;tr|B4DFH3|B4DFH3_HUMAN;tr|H0Y9D8|H0Y9D8_HUMAN;tr|B4DR66|B4DR66_HUMAN;tr|A8K0P2|A8K0P2_HUMAN;tr|D6R967|D6R967_HUMAN;tr|D6RGV9|D6RGV9_HUMAN;tr|H0YAK2|H0YAK2_HUMAN;tr|D6RGI1|D6RGI1_HUMAN	sp|Q9H2U2|IPYR2_HUMAN;tr|B4DFH3|B4DFH3_HUMAN;tr|H0Y9D8|H0Y9D8_HUMAN;tr|B4DR66|B4DR66_HUMAN;tr|A8K0P2|A8K0P2_HUMAN;tr|D6R967|D6R967_HUMAN	sp|Q9H2U2|IPYR2_HUMAN Inorganic pyrophosphatase 2, mitochondrial OS=Homo sapiens OX=9606 GN=PPA2 PE=1 SV=2;tr|B4DFH3|B4DFH3_HUMAN cDNA FLJ59863, highly similar to Inorganic pyrophosphatase 2, mitochondrial (EC 3.6.1.1) OS=Homo sapiens OX=9606 PE=2 SV=1;tr|	77157000	74200000	73784000	67544000	73281000	70224000	60283000	63870000
sp|Q9H307|PININ_HUMAN;tr|A8K964|A8K964_HUMAN;tr|B4DTD4|B4DTD4_HUMAN;tr|B4E392|B4E392_HUMAN;tr|G3V5F0|G3V5F0_HUMAN;tr|G3V579|G3V579_HUMAN	sp|Q9H307|PININ_HUMAN;tr|A8K964|A8K964_HUMAN	sp|Q9H307|PININ_HUMAN Pinin OS=Homo sapiens OX=9606 GN=PNN PE=1 SV=5;tr|A8K964|A8K964_HUMAN cDNA FLJ75071, highly similar to Homo sapiens pinin, desmosome associated protein (PNN), mRNA OS=Homo sapiens OX=9606 PE=2 SV=1	99239000	92153000	100220000	97802000	107280000	91502000	97295000	103020000
sp|Q9H3K6|BOLA2_HUMAN;tr|A0A087WZT3|A0A087WZT3_HUMAN;tr|H3BV85|H3BV85_HUMAN;tr|H3BTW0|H3BTW0_HUMAN;tr|A0A0B4J295|A0A0B4J295_HUMAN;tr|H3BVE0|H3BVE0_HUMAN	sp|Q9H3K6|BOLA2_HUMAN;tr|A0A087WZT3|A0A087WZT3_HUMAN	sp|Q9H3K6|BOLA2_HUMAN BolA-like protein 2 OS=Homo sapiens OX=9606 GN=BOLA2 PE=1 SV=1;tr|A0A087WZT3|A0A087WZT3_HUMAN BolA-like protein 2 OS=Homo sapiens OX=9606 GN=BOLA2 PE=1 SV=2	107620000	90086000	105560000	108650000	134240000	125040000	118320000	134720000
sp|Q9H3N1|TMX1_HUMAN;tr|G3V448|G3V448_HUMAN;tr|B4DZX7|B4DZX7_HUMAN;tr|B7Z7R5|B7Z7R5_HUMAN	sp|Q9H3N1|TMX1_HUMAN	sp|Q9H3N1|TMX1_HUMAN Thioredoxin-related transmembrane protein 1 OS=Homo sapiens OX=9606 GN=TMX1 PE=1 SV=1	97887000	97581000	101050000	99923000	102370000	100260000	94686000	104400000
sp|Q9H3U1|UN45A_HUMAN;tr|A0A1W2PNX8|A0A1W2PNX8_HUMAN;tr|B4DLE6|B4DLE6_HUMAN;tr|B4DZL0|B4DZL0_HUMAN	sp|Q9H3U1|UN45A_HUMAN;tr|A0A1W2PNX8|A0A1W2PNX8_HUMAN	sp|Q9H3U1|UN45A_HUMAN Protein unc-45 homolog A OS=Homo sapiens OX=9606 GN=UNC45A PE=1 SV=1;tr|A0A1W2PNX8|A0A1W2PNX8_HUMAN Protein unc-45 homolog A OS=Homo sapiens OX=9606 GN=UNC45A PE=1 SV=1	17050000	18042000	17291000	15208000	18269000	21288000	23179000	22961000
sp|Q9H444|CHM4B_HUMAN	sp|Q9H444|CHM4B_HUMAN	sp|Q9H444|CHM4B_HUMAN Charged multivesicular body protein 4b OS=Homo sapiens OX=9606 GN=CHMP4B PE=1 SV=1	151570000	145850000	150400000	141230000	127160000	121360000	119460000	132680000
sp|Q9H488|OFUT1_HUMAN;tr|B4DZS3|B4DZS3_HUMAN;tr|B4DUV4|B4DUV4_HUMAN	sp|Q9H488|OFUT1_HUMAN;tr|B4DZS3|B4DZS3_HUMAN	sp|Q9H488|OFUT1_HUMAN GDP-fucose protein O-fucosyltransferase 1 OS=Homo sapiens OX=9606 GN=POFUT1 PE=1 SV=1;tr|B4DZS3|B4DZS3_HUMAN cDNA FLJ50933, highly similar to GDP-fucose protein O-fucosyltransferase 1 (EC 2.4.1.221) OS=Homo sapiens OX=9606 PE=2 SV=1	115290000	96447000	81854000	108220000	98768000	90086000	85586000	81057000
sp|Q9H4L5|OSBL3_HUMAN;tr|C9J8P4|C9J8P4_HUMAN;tr|C9JEF2|C9JEF2_HUMAN;tr|C9JZ19|C9JZ19_HUMAN;sp|Q9BZF3|OSBL6_HUMAN	sp|Q9H4L5|OSBL3_HUMAN	sp|Q9H4L5|OSBL3_HUMAN Oxysterol-binding protein-related protein 3 OS=Homo sapiens OX=9606 GN=OSBPL3 PE=1 SV=1	72813000	68126000	76943000	76094000	49742000	44586000	50753000	56802000
sp|Q9H6S3|ES8L2_HUMAN;tr|B4DFD2|B4DFD2_HUMAN;tr|H0YD62|H0YD62_HUMAN;tr|H0YF37|H0YF37_HUMAN;tr|E9PN68|E9PN68_HUMAN;tr|E9PLN2|E9PLN2_HUMAN;tr|E9PNT0|E9PNT0_HUMAN;tr|E9PLH1|E9PLH1_HUMAN;tr|A0A087WX39|A0A087WX39_HUMAN	sp|Q9H6S3|ES8L2_HUMAN	sp|Q9H6S3|ES8L2_HUMAN Epidermal growth factor receptor kinase substrate 8-like protein 2 OS=Homo sapiens OX=9606 GN=EPS8L2 PE=1 SV=2	97724000	87043000	92508000	92863000	64096000	74082000	61074000	59858000
sp|Q9H6Z4|RANB3_HUMAN;tr|B7Z5P4|B7Z5P4_HUMAN;tr|K7EN31|K7EN31_HUMAN	sp|Q9H6Z4|RANB3_HUMAN;tr|B7Z5P4|B7Z5P4_HUMAN	sp|Q9H6Z4|RANB3_HUMAN Ran-binding protein 3 OS=Homo sapiens OX=9606 GN=RANBP3 PE=1 SV=1;tr|B7Z5P4|B7Z5P4_HUMAN cDNA FLJ55542, highly similar to Ran-binding protein 3 OS=Homo sapiens OX=9606 PE=2 SV=1	35322000	35446000	39903000	38306000	38362000	40809000	39309000	41777000
sp|Q9H773|DCTP1_HUMAN;tr|H3BPN2|H3BPN2_HUMAN;tr|H3BSA6|H3BSA6_HUMAN	sp|Q9H773|DCTP1_HUMAN	sp|Q9H773|DCTP1_HUMAN dCTP pyrophosphatase 1 OS=Homo sapiens OX=9606 GN=DCTPP1 PE=1 SV=1	19168000	13503000	18881000	17114000	21416000	24073000	20016000	19052000
sp|Q9H8S9|MOB1A_HUMAN;sp|Q7L9L4|MOB1B_HUMAN;tr|B3KSH6|B3KSH6_HUMAN;tr|Q4W5E0|Q4W5E0_HUMAN;tr|D6RCK3|D6RCK3_HUMAN	sp|Q9H8S9|MOB1A_HUMAN;sp|Q7L9L4|MOB1B_HUMAN;tr|B3KSH6|B3KSH6_HUMAN;tr|Q4W5E0|Q4W5E0_HUMAN;tr|D6RCK3|D6RCK3_HUMAN	sp|Q9H8S9|MOB1A_HUMAN MOB kinase activator 1A OS=Homo sapiens OX=9606 GN=MOB1A PE=1 SV=4;sp|Q7L9L4|MOB1B_HUMAN MOB kinase activator 1B OS=Homo sapiens OX=9606 GN=MOB1B PE=1 SV=3;tr|B3KSH6|B3KSH6_HUMAN MOB1, Mps One Binder kinase activator-like 1A (Yeast),	42492000	42300000	42066000	39744000	45379000	41187000	42736000	45895000
sp|Q9H910|JUPI2_HUMAN;tr|A6NGP5|A6NGP5_HUMAN;tr|H3BU16|H3BU16_HUMAN;tr|H3BMV3|H3BMV3_HUMAN;tr|B4DL85|B4DL85_HUMAN;tr|H3BMT0|H3BMT0_HUMAN;tr|H3BTV5|H3BTV5_HUMAN;tr|H3BMM8|H3BMM8_HUMAN;tr|B4E1P3|B4E1P3_HUMAN;tr|H3BS08|H3BS08_HUMAN	sp|Q9H910|JUPI2_HUMAN;tr|A6NGP5|A6NGP5_HUMAN;tr|H3BU16|H3BU16_HUMAN;tr|H3BMV3|H3BMV3_HUMAN;tr|B4DL85|B4DL85_HUMAN;tr|H3BMT0|H3BMT0_HUMAN;tr|H3BTV5|H3BTV5_HUMAN	sp|Q9H910|JUPI2_HUMAN Jupiter microtubule associated homolog 2 OS=Homo sapiens OX=9606 GN=JPT2 PE=1 SV=1;tr|A6NGP5|A6NGP5_HUMAN Jupiter microtubule-associated homolog 2 OS=Homo sapiens OX=9606 GN=JPT2 PE=1 SV=2;tr|H3BU16|H3BU16_HUMAN Jupiter microtubule-as	90679000	87856000	93218000	86468000	102240000	100500000	92475000	95232000
sp|Q9H9B4|SFXN1_HUMAN;tr|S4R2X2|S4R2X2_HUMAN;tr|D6RFI0|D6RFI0_HUMAN;tr|D6RDG7|D6RDG7_HUMAN;tr|D6RAE9|D6RAE9_HUMAN	sp|Q9H9B4|SFXN1_HUMAN;tr|S4R2X2|S4R2X2_HUMAN;tr|D6RFI0|D6RFI0_HUMAN;tr|D6RDG7|D6RDG7_HUMAN	sp|Q9H9B4|SFXN1_HUMAN Sideroflexin-1 OS=Homo sapiens OX=9606 GN=SFXN1 PE=1 SV=4;tr|S4R2X2|S4R2X2_HUMAN Sideroflexin-1 OS=Homo sapiens OX=9606 GN=SFXN1 PE=1 SV=1;tr|D6RFI0|D6RFI0_HUMAN Sideroflexin-1 (Fragment) OS=Homo sapiens OX=9606 GN=SFXN1 PE=1 SV=8;tr|	95097000	83940000	83138000	88514000	104710000	118690000	92449000	92288000
sp|Q9HAV4|XPO5_HUMAN;tr|B3KPQ5|B3KPQ5_HUMAN;tr|B3KNC6|B3KNC6_HUMAN;tr|Q9H8N6|Q9H8N6_HUMAN;tr|E2QRM3|E2QRM3_HUMAN;tr|H0Y9I3|H0Y9I3_HUMAN;tr|H0Y3Q8|H0Y3Q8_HUMAN;tr|H0Y3W3|H0Y3W3_HUMAN	sp|Q9HAV4|XPO5_HUMAN;tr|B3KPQ5|B3KPQ5_HUMAN;tr|B3KNC6|B3KNC6_HUMAN;tr|Q9H8N6|Q9H8N6_HUMAN	sp|Q9HAV4|XPO5_HUMAN Exportin-5 OS=Homo sapiens OX=9606 GN=XPO5 PE=1 SV=1;tr|B3KPQ5|B3KPQ5_HUMAN cDNA FLJ32057 fis, clone NTONG2001642, highly similar to Exportin-5 OS=Homo sapiens OX=9606 PE=2 SV=1;tr|B3KNC6|B3KNC6_HUMAN cDNA FLJ14239 fis, clone NT2RP5003	82860000	85108000	80719000	84206000	141580000	142800000	131410000	139630000
sp|Q9HAV7|GRPE1_HUMAN;tr|B4DWV5|B4DWV5_HUMAN	sp|Q9HAV7|GRPE1_HUMAN;tr|B4DWV5|B4DWV5_HUMAN	sp|Q9HAV7|GRPE1_HUMAN GrpE protein homolog 1, mitochondrial OS=Homo sapiens OX=9606 GN=GRPEL1 PE=1 SV=2;tr|B4DWV5|B4DWV5_HUMAN GrpE protein homolog OS=Homo sapiens OX=9606 PE=2 SV=1	82901000	71841000	71523000	69356000	89644000	93995000	81067000	88002000
sp|Q9HC07|TM165_HUMAN;tr|B3KNQ2|B3KNQ2_HUMAN;tr|V9GY93|V9GY93_HUMAN;tr|D6RBL0|D6RBL0_HUMAN;tr|D6RD79|D6RD79_HUMAN	sp|Q9HC07|TM165_HUMAN;tr|B3KNQ2|B3KNQ2_HUMAN;tr|V9GY93|V9GY93_HUMAN	sp|Q9HC07|TM165_HUMAN Transmembrane protein 165 OS=Homo sapiens OX=9606 GN=TMEM165 PE=1 SV=1;tr|B3KNQ2|B3KNQ2_HUMAN cDNA FLJ30150 fis, clone BRACE2000300, highly similar to Transmembrane protein TPARL OS=Homo sapiens OX=9606 PE=2 SV=1;tr|V9GY93|V9GY93_HUMA	41578000	33356000	40471000	42074000	40380000	37838000	30413000	39261000
sp|Q9HC35|EMAL4_HUMAN;tr|B5MBZ0|B5MBZ0_HUMAN;tr|A6P4V4|A6P4V4_HUMAN;tr|A6P4T4|A6P4T4_HUMAN;tr|C1PHA0|C1PHA0_HUMAN;tr|B6EXY3|B6EXY3_HUMAN;tr|C1PHA1|C1PHA1_HUMAN;tr|J7MA22|J7MA22_HUMAN;tr|B3XZL9|B3XZL9_HUMAN;tr|B3XZM0|B3XZM0_HUMAN;tr|A9YLN7|A9YLN7_HUMAN;tr|B4DIT9|B4DIT9_HUMAN;tr|B6EXY4|B6EXY4_HUMAN;tr|B6EXY5|B6EXY5_HUMAN;tr|I1X3U7|I1X3U7_HUMAN	sp|Q9HC35|EMAL4_HUMAN;tr|B5MBZ0|B5MBZ0_HUMAN;tr|A6P4V4|A6P4V4_HUMAN;tr|A6P4T4|A6P4T4_HUMAN;tr|C1PHA0|C1PHA0_HUMAN;tr|B6EXY3|B6EXY3_HUMAN;tr|C1PHA1|C1PHA1_HUMAN;tr|J7MA22|J7MA22_HUMAN;tr|B3XZL9|B3XZL9_HUMAN;tr|B3XZM0|B3XZM0_HUMAN;tr|A9YLN7|A9YLN7_HUMAN	sp|Q9HC35|EMAL4_HUMAN Echinoderm microtubule-associated protein-like 4 OS=Homo sapiens OX=9606 GN=EML4 PE=1 SV=3;tr|B5MBZ0|B5MBZ0_HUMAN Echinoderm microtubule-associated protein-like 4 OS=Homo sapiens OX=9606 GN=EML4 PE=1 SV=3;tr|A6P4V4|A6P4V4_HUMAN Tyrosi	28524000	28031000	32404000	35667000	32177000	29762000	26561000	20843000
sp|Q9HDC9|APMAP_HUMAN;tr|H0Y512|H0Y512_HUMAN	sp|Q9HDC9|APMAP_HUMAN;tr|H0Y512|H0Y512_HUMAN	sp|Q9HDC9|APMAP_HUMAN Adipocyte plasma membrane-associated protein OS=Homo sapiens OX=9606 GN=APMAP PE=1 SV=2;tr|H0Y512|H0Y512_HUMAN Adipocyte plasma membrane-associated protein (Fragment) OS=Homo sapiens OX=9606 GN=APMAP PE=1 SV=1	274200000	267620000	275080000	276550000	259460000	270730000	251180000	257610000
sp|Q9NP72|RAB18_HUMAN;tr|A0A087X163|A0A087X163_HUMAN;tr|B7Z5V3|B7Z5V3_HUMAN;tr|Q5W0J0|Q5W0J0_HUMAN;tr|B7Z4P9|B7Z4P9_HUMAN;tr|Q9BZT2|Q9BZT2_HUMAN;tr|Q59EW3|Q59EW3_HUMAN;tr|H0Y6T8|H0Y6T8_HUMAN	sp|Q9NP72|RAB18_HUMAN;tr|A0A087X163|A0A087X163_HUMAN;tr|B7Z5V3|B7Z5V3_HUMAN;tr|Q5W0J0|Q5W0J0_HUMAN;tr|B7Z4P9|B7Z4P9_HUMAN	sp|Q9NP72|RAB18_HUMAN Ras-related protein Rab-18 OS=Homo sapiens OX=9606 GN=RAB18 PE=1 SV=1;tr|A0A087X163|A0A087X163_HUMAN Ras-related protein Rab-18 OS=Homo sapiens OX=9606 GN=RAB18 PE=1 SV=1;tr|B7Z5V3|B7Z5V3_HUMAN cDNA FLJ53088, highly similar to Ras-rel	52223000	52329000	43963000	45417000	69104000	61397000	62906000	57651000
sp|Q9NP97|DLRB1_HUMAN;tr|B4DFR2|B4DFR2_HUMAN;tr|B1AKR6|B1AKR6_HUMAN;tr|A0A140VJH9|A0A140VJH9_HUMAN;sp|Q8TF09|DLRB2_HUMAN;tr|H3BNG9|H3BNG9_HUMAN;tr|H3BPA0|H3BPA0_HUMAN;tr|Q7Z4M1|Q7Z4M1_HUMAN;tr|H3BQI1|H3BQI1_HUMAN	sp|Q9NP97|DLRB1_HUMAN;tr|B4DFR2|B4DFR2_HUMAN;tr|B1AKR6|B1AKR6_HUMAN	sp|Q9NP97|DLRB1_HUMAN Dynein light chain roadblock-type 1 OS=Homo sapiens OX=9606 GN=DYNLRB1 PE=1 SV=3;tr|B4DFR2|B4DFR2_HUMAN cDNA FLJ59194, moderately similar to Dynein light chain 2A, cytoplasmic OS=Homo sapiens OX=9606 PE=2 SV=1;tr|B1AKR6|B1AKR6_HUMAN D	151830000	140420000	123910000	142420000	148400000	139730000	108770000	117650000
sp|Q9NPQ8|RIC8A_HUMAN;tr|E9PSI0|E9PSI0_HUMAN;tr|H0YEN0|H0YEN0_HUMAN;tr|E9PI04|E9PI04_HUMAN;tr|H0YE35|H0YE35_HUMAN;tr|E9PLE5|E9PLE5_HUMAN;tr|H0YC88|H0YC88_HUMAN;sp|Q9NVN3|RIC8B_HUMAN;tr|A0A024RBG9|A0A024RBG9_HUMAN;tr|B7WPL0|B7WPL0_HUMAN	sp|Q9NPQ8|RIC8A_HUMAN	sp|Q9NPQ8|RIC8A_HUMAN Synembryn-A OS=Homo sapiens OX=9606 GN=RIC8A PE=1 SV=3	42853000	43703000	42477000	46818000	46811000	39280000	47873000	48239000
sp|Q9NQC3|RTN4_HUMAN;tr|Q53R94|Q53R94_HUMAN;tr|Q53SY1|Q53SY1_HUMAN;tr|A6XGP7|A6XGP7_HUMAN;tr|H7C106|H7C106_HUMAN;tr|D6W5C2|D6W5C2_HUMAN;tr|Q3LIF4|Q3LIF4_HUMAN;tr|A0A0U1RQR6|A0A0U1RQR6_HUMAN;tr|Q53RF4|Q53RF4_HUMAN	sp|Q9NQC3|RTN4_HUMAN;tr|Q53R94|Q53R94_HUMAN	sp|Q9NQC3|RTN4_HUMAN Reticulon-4 OS=Homo sapiens OX=9606 GN=RTN4 PE=1 SV=2;tr|Q53R94|Q53R94_HUMAN Uncharacterized protein RTN4 (Fragment) OS=Homo sapiens OX=9606 GN=RTN4 PE=4 SV=1	1033600000	1023600000	1030900000	1120700000	936910000	894990000	949780000	955530000
sp|Q9NQG5|RPR1B_HUMAN;tr|A2A2M0|A2A2M0_HUMAN;tr|A0A087X2D2|A0A087X2D2_HUMAN;tr|E9PIQ9|E9PIQ9_HUMAN;tr|A0A087WUK3|A0A087WUK3_HUMAN;tr|E9PQF3|E9PQF3_HUMAN	sp|Q9NQG5|RPR1B_HUMAN	sp|Q9NQG5|RPR1B_HUMAN Regulation of nuclear pre-mRNA domain-containing protein 1B OS=Homo sapiens OX=9606 GN=RPRD1B PE=1 SV=1	76113000	83466000	76115000	77881000	86438000	81419000	78158000	77036000
sp|Q9NQP4|PFD4_HUMAN;tr|B2R548|B2R548_HUMAN;tr|E9PQY2|E9PQY2_HUMAN	sp|Q9NQP4|PFD4_HUMAN;tr|B2R548|B2R548_HUMAN;tr|E9PQY2|E9PQY2_HUMAN	sp|Q9NQP4|PFD4_HUMAN Prefoldin subunit 4 OS=Homo sapiens OX=9606 GN=PFDN4 PE=1 SV=1;tr|B2R548|B2R548_HUMAN Prefoldin subunit 4 OS=Homo sapiens OX=9606 PE=2 SV=1;tr|E9PQY2|E9PQY2_HUMAN Prefoldin subunit 4 OS=Homo sapiens OX=9606 GN=PFDN4 PE=1 SV=1	70053000	62797000	69942000	74351000	67229000	65921000	62736000	62005000
sp|Q9NQW7|XPP1_HUMAN;tr|Q5T6H7|Q5T6H7_HUMAN;tr|B3KSI7|B3KSI7_HUMAN	sp|Q9NQW7|XPP1_HUMAN;tr|Q5T6H7|Q5T6H7_HUMAN;tr|B3KSI7|B3KSI7_HUMAN	sp|Q9NQW7|XPP1_HUMAN Xaa-Pro aminopeptidase 1 OS=Homo sapiens OX=9606 GN=XPNPEP1 PE=1 SV=3;tr|Q5T6H7|Q5T6H7_HUMAN Xaa-Pro aminopeptidase 1 OS=Homo sapiens OX=9606 GN=XPNPEP1 PE=1 SV=1;tr|B3KSI7|B3KSI7_HUMAN cDNA FLJ36374 fis, clone THYMU2008185, highly sim	47935000	48262000	46289000	50059000	51541000	52254000	48608000	40516000
sp|Q9NR12|PDLI7_HUMAN;tr|D6RF83|D6RF83_HUMAN;tr|D6RH06|D6RH06_HUMAN;tr|H7BYK4|H7BYK4_HUMAN;tr|D6RAN1|D6RAN1_HUMAN;tr|H0Y8W6|H0Y8W6_HUMAN	sp|Q9NR12|PDLI7_HUMAN;tr|D6RF83|D6RF83_HUMAN;tr|D6RH06|D6RH06_HUMAN	sp|Q9NR12|PDLI7_HUMAN PDZ and LIM domain protein 7 OS=Homo sapiens OX=9606 GN=PDLIM7 PE=1 SV=1;tr|D6RF83|D6RF83_HUMAN PDZ and LIM domain protein 7 (Fragment) OS=Homo sapiens OX=9606 GN=PDLIM7 PE=1 SV=1;tr|D6RH06|D6RH06_HUMAN PDZ and LIM domain protein 7 (F	67497000	70179000	68055000	80126000	68894000	71430000	72290000	77520000
sp|Q9NR30|DDX21_HUMAN;tr|Q8NI92|Q8NI92_HUMAN;tr|Q3SWU7|Q3SWU7_HUMAN	sp|Q9NR30|DDX21_HUMAN	sp|Q9NR30|DDX21_HUMAN Nucleolar RNA helicase 2 OS=Homo sapiens OX=9606 GN=DDX21 PE=1 SV=5	81776000	106020000	123250000	148180000	43698000	100340000	157950000	118520000
sp|Q9NR45|SIAS_HUMAN;tr|V9HW39|V9HW39_HUMAN;tr|Q5TBR1|Q5TBR1_HUMAN;tr|Q5TBR0|Q5TBR0_HUMAN	sp|Q9NR45|SIAS_HUMAN;tr|V9HW39|V9HW39_HUMAN	sp|Q9NR45|SIAS_HUMAN Sialic acid synthase OS=Homo sapiens OX=9606 GN=NANS PE=1 SV=2;tr|V9HW39|V9HW39_HUMAN Epididymis secretory protein Li 100 OS=Homo sapiens OX=9606 GN=HEL-S-100 PE=2 SV=1	201360000	189150000	188290000	211200000	187360000	188560000	176080000	170450000
sp|Q9NRN7|ADPPT_HUMAN;tr|E9PNF3|E9PNF3_HUMAN;tr|E9PLW6|E9PLW6_HUMAN	sp|Q9NRN7|ADPPT_HUMAN;tr|E9PNF3|E9PNF3_HUMAN;tr|E9PLW6|E9PLW6_HUMAN	sp|Q9NRN7|ADPPT_HUMAN L-aminoadipate-semialdehyde dehydrogenase-phosphopantetheinyl transferase OS=Homo sapiens OX=9606 GN=AASDHPPT PE=1 SV=2;tr|E9PNF3|E9PNF3_HUMAN L-aminoadipate-semialdehyde dehydrogenase-phosphopantetheinyl transferase (Fragment) OS=Hom	14745000	24517000	19551000	18793000	24829000	22781000	25957000	22283000
sp|Q9NS25|SPNXB_HUMAN;tr|Q32WN1|Q32WN1_HUMAN;tr|Q32WJ6|Q32WJ6_HUMAN;tr|Q4KRP8|Q4KRP8_HUMAN;tr|A1E2J9|A1E2J9_HUMAN;tr|A0FGX0|A0FGX0_HUMAN;tr|A0FGW6|A0FGW6_HUMAN	sp|Q9NS25|SPNXB_HUMAN;tr|Q32WN1|Q32WN1_HUMAN	sp|Q9NS25|SPNXB_HUMAN Sperm protein associated with the nucleus on the X chromosome B1 OS=Homo sapiens OX=9606 GN=SPANXB1 PE=2 SV=2;tr|Q32WN1|Q32WN1_HUMAN SPANX-B OS=Homo sapiens OX=9606 PE=4 SV=1	567240000	533970000	568950000	564150000	319260000	286520000	280940000	302610000
sp|Q9NTJ3|SMC4_HUMAN;tr|E9PD53|E9PD53_HUMAN;tr|B3KXX5|B3KXX5_HUMAN;tr|B3KVJ5|B3KVJ5_HUMAN;tr|Q6P169|Q6P169_HUMAN;tr|C9JR83|C9JR83_HUMAN;tr|Q6NSG3|Q6NSG3_HUMAN;tr|Q58F29|Q58F29_HUMAN;tr|C9JVD8|C9JVD8_HUMAN;tr|C9J578|C9J578_HUMAN;tr|C9J9E4|C9J9E4_HUMAN;tr|C9JWF0|C9JWF0_HUMAN;tr|C9IYK2|C9IYK2_HUMAN;tr|C9JJ64|C9JJ64_HUMAN	sp|Q9NTJ3|SMC4_HUMAN;tr|E9PD53|E9PD53_HUMAN;tr|B3KXX5|B3KXX5_HUMAN;tr|B3KVJ5|B3KVJ5_HUMAN	sp|Q9NTJ3|SMC4_HUMAN Structural maintenance of chromosomes protein 4 OS=Homo sapiens OX=9606 GN=SMC4 PE=1 SV=2;tr|E9PD53|E9PD53_HUMAN Structural maintenance of chromosomes protein OS=Homo sapiens OX=9606 GN=SMC4 PE=1 SV=1;tr|B3KXX5|B3KXX5_HUMAN Structural	88181000	75248000	97183000	81426000	76438000	66376000	84351000	95075000
sp|Q9NTK5|OLA1_HUMAN;tr|J3KQ32|J3KQ32_HUMAN;tr|B4DK14|B4DK14_HUMAN;tr|Q53SQ6|Q53SQ6_HUMAN;tr|Q53SW9|Q53SW9_HUMAN;tr|C9JTK6|C9JTK6_HUMAN;tr|C9JCJ9|C9JCJ9_HUMAN	sp|Q9NTK5|OLA1_HUMAN;tr|J3KQ32|J3KQ32_HUMAN;tr|B4DK14|B4DK14_HUMAN;tr|Q53SQ6|Q53SQ6_HUMAN	sp|Q9NTK5|OLA1_HUMAN Obg-like ATPase 1 OS=Homo sapiens OX=9606 GN=OLA1 PE=1 SV=2;tr|J3KQ32|J3KQ32_HUMAN Obg-like ATPase 1 OS=Homo sapiens OX=9606 GN=OLA1 PE=1 SV=1;tr|B4DK14|B4DK14_HUMAN cDNA FLJ58890, highly similar to GTP-binding protein PTD004 OS=Homo s	232340000	226690000	206740000	218820000	260170000	240970000	246220000	257850000
sp|Q9NV96|CC50A_HUMAN;tr|B4DIF5|B4DIF5_HUMAN;tr|B4DDK3|B4DDK3_HUMAN	sp|Q9NV96|CC50A_HUMAN;tr|B4DIF5|B4DIF5_HUMAN	sp|Q9NV96|CC50A_HUMAN Cell cycle control protein 50A OS=Homo sapiens OX=9606 GN=TMEM30A PE=1 SV=1;tr|B4DIF5|B4DIF5_HUMAN Cell cycle control protein OS=Homo sapiens OX=9606 PE=2 SV=1	6998800	7593400	8176400	7416500	5934800	5599200	6198600	6869100
sp|Q9NVD7|PARVA_HUMAN;tr|J3KNQ4|J3KNQ4_HUMAN;tr|B7Z952|B7Z952_HUMAN;tr|E9PS97|E9PS97_HUMAN;tr|A0A087WZB5|A0A087WZB5_HUMAN;sp|Q9HBI1|PARVB_HUMAN	sp|Q9NVD7|PARVA_HUMAN;tr|J3KNQ4|J3KNQ4_HUMAN;tr|B7Z952|B7Z952_HUMAN;tr|E9PS97|E9PS97_HUMAN	sp|Q9NVD7|PARVA_HUMAN Alpha-parvin OS=Homo sapiens OX=9606 GN=PARVA PE=1 SV=1;tr|J3KNQ4|J3KNQ4_HUMAN Alpha-parvin OS=Homo sapiens OX=9606 GN=PARVA PE=1 SV=1;tr|B7Z952|B7Z952_HUMAN cDNA FLJ54827, highly similar to Alpha-parvin OS=Homo sapiens OX=9606 PE=2 S	74021000	64206000	60554000	64110000	69664000	61698000	62069000	65038000
sp|Q9NVI7|ATD3A_HUMAN;tr|H0Y2W2|H0Y2W2_HUMAN;tr|Q96T67|Q96T67_HUMAN;tr|Q5SV16|Q5SV16_HUMAN;sp|Q5T2N8|ATD3C_HUMAN;sp|Q5T9A4|ATD3B_HUMAN;tr|Q9H834|Q9H834_HUMAN;tr|J3QSF3|J3QSF3_HUMAN;tr|Q8N3E6|Q8N3E6_HUMAN	sp|Q9NVI7|ATD3A_HUMAN;tr|H0Y2W2|H0Y2W2_HUMAN	sp|Q9NVI7|ATD3A_HUMAN ATPase family AAA domain-containing protein 3A OS=Homo sapiens OX=9606 GN=ATAD3A PE=1 SV=2;tr|H0Y2W2|H0Y2W2_HUMAN ATPase family AAA domain-containing protein 3A (Fragment) OS=Homo sapiens OX=9606 GN=ATAD3A PE=1 SV=1	48729000	66445000	61995000	65762000	69611000	56933000	72353000	57778000
sp|Q9NX58|LYAR_HUMAN;tr|A8K3Y5|A8K3Y5_HUMAN;tr|D6RDJ1|D6RDJ1_HUMAN	sp|Q9NX58|LYAR_HUMAN;tr|A8K3Y5|A8K3Y5_HUMAN	sp|Q9NX58|LYAR_HUMAN Cell growth-regulating nucleolar protein OS=Homo sapiens OX=9606 GN=LYAR PE=1 SV=2;tr|A8K3Y5|A8K3Y5_HUMAN cDNA FLJ78186 OS=Homo sapiens OX=9606 PE=2 SV=1	52049000	45913000	57484000	62600000	50619000	48812000	66258000	69798000
sp|Q9NXV6|CARF_HUMAN;tr|J3KNE1|J3KNE1_HUMAN;tr|D6RGD2|D6RGD2_HUMAN;tr|B3KTW3|B3KTW3_HUMAN;tr|Q7Z335|Q7Z335_HUMAN	sp|Q9NXV6|CARF_HUMAN	sp|Q9NXV6|CARF_HUMAN CDKN2A-interacting protein OS=Homo sapiens OX=9606 GN=CDKN2AIP PE=1 SV=3	12294000	12214000	15044000	14772000	14358000	14643000	15875000	14584000
sp|Q9NY27|PP4R2_HUMAN;tr|H7C559|H7C559_HUMAN;tr|C9IZ04|C9IZ04_HUMAN;tr|C9IZF4|C9IZF4_HUMAN;tr|F8WCA1|F8WCA1_HUMAN;tr|D3DTC3|D3DTC3_HUMAN	sp|Q9NY27|PP4R2_HUMAN	sp|Q9NY27|PP4R2_HUMAN Serine/threonine-protein phosphatase 4 regulatory subunit 2 OS=Homo sapiens OX=9606 GN=PPP4R2 PE=1 SV=3	28878000	26956000	32249000	27560000	33836000	28565000	32141000	31897000
sp|Q9NYF8|BCLF1_HUMAN;tr|E9PJA7|E9PJA7_HUMAN;tr|Q6DCA8|Q6DCA8_HUMAN;tr|A0A1W2PQ43|A0A1W2PQ43_HUMAN;tr|E9PK09|E9PK09_HUMAN;tr|E9PQN2|E9PQN2_HUMAN;tr|E9PKI6|E9PKI6_HUMAN;tr|E9PK91|E9PK91_HUMAN;tr|H0YF00|H0YF00_HUMAN	sp|Q9NYF8|BCLF1_HUMAN;tr|E9PJA7|E9PJA7_HUMAN;tr|Q6DCA8|Q6DCA8_HUMAN;tr|A0A1W2PQ43|A0A1W2PQ43_HUMAN;tr|E9PK09|E9PK09_HUMAN;tr|E9PQN2|E9PQN2_HUMAN;tr|E9PKI6|E9PKI6_HUMAN;tr|E9PK91|E9PK91_HUMAN	sp|Q9NYF8|BCLF1_HUMAN Bcl-2-associated transcription factor 1 OS=Homo sapiens OX=9606 GN=BCLAF1 PE=1 SV=2;tr|E9PJA7|E9PJA7_HUMAN Bcl-2-associated transcription factor 1 OS=Homo sapiens OX=9606 GN=BCLAF1 PE=1 SV=1;tr|Q6DCA8|Q6DCA8_HUMAN BCLAF1 protein (Frag	64834000	60464000	71623000	65097000	76284000	80587000	69070000	75279000
sp|Q9NZ01|TECR_HUMAN;tr|B3KM97|B3KM97_HUMAN;tr|B3KSQ1|B3KSQ1_HUMAN;tr|M0QXM3|M0QXM3_HUMAN;tr|M0R3C3|M0R3C3_HUMAN;tr|M0R329|M0R329_HUMAN;tr|B4DR74|B4DR74_HUMAN	sp|Q9NZ01|TECR_HUMAN;tr|B3KM97|B3KM97_HUMAN;tr|B3KSQ1|B3KSQ1_HUMAN;tr|M0QXM3|M0QXM3_HUMAN	sp|Q9NZ01|TECR_HUMAN Very-long-chain enoyl-CoA reductase OS=Homo sapiens OX=9606 GN=TECR PE=1 SV=1;tr|B3KM97|B3KM97_HUMAN cDNA FLJ10554 fis, clone NT2RP2002385, highly similar to Synaptic glycoprotein SC2 OS=Homo sapiens OX=9606 PE=2 SV=1;tr|B3KSQ1|B3KSQ1_	133880000	130960000	129320000	162870000	108080000	103620000	132580000	109560000
sp|Q9NZB2|F120A_HUMAN;tr|A0A0C4DG79|A0A0C4DG79_HUMAN;tr|A0A0C4DH52|A0A0C4DH52_HUMAN;sp|Q5T035|CI129_HUMAN	sp|Q9NZB2|F120A_HUMAN	sp|Q9NZB2|F120A_HUMAN Constitutive coactivator of PPAR-gamma-like protein 1 OS=Homo sapiens OX=9606 GN=FAM120A PE=1 SV=2	88379000	84180000	94902000	86051000	74916000	77947000	77126000	83743000
sp|Q9NZL4|HPBP1_HUMAN;tr|K7EN20|K7EN20_HUMAN;tr|K7EL16|K7EL16_HUMAN;tr|A0A024R4R7|A0A024R4R7_HUMAN;tr|K7ERT9|K7ERT9_HUMAN;tr|K7EKM6|K7EKM6_HUMAN;tr|K7EMM7|K7EMM7_HUMAN	sp|Q9NZL4|HPBP1_HUMAN	sp|Q9NZL4|HPBP1_HUMAN Hsp70-binding protein 1 OS=Homo sapiens OX=9606 GN=HSPBP1 PE=1 SV=1	42826000	39895000	35472000	35494000	39225000	43103000	38114000	41544000
sp|Q9NZM1|MYOF_HUMAN;tr|H0YD14|H0YD14_HUMAN;tr|B3KSL7|B3KSL7_HUMAN;sp|O75923|DYSF_HUMAN	sp|Q9NZM1|MYOF_HUMAN;tr|H0YD14|H0YD14_HUMAN	sp|Q9NZM1|MYOF_HUMAN Myoferlin OS=Homo sapiens OX=9606 GN=MYOF PE=1 SV=1;tr|H0YD14|H0YD14_HUMAN Myoferlin (Fragment) OS=Homo sapiens OX=9606 GN=MYOF PE=1 SV=1	1367200000	1331600000	1297500000	1341800000	1126300000	1129300000	1061100000	1128300000
sp|Q9NZT2|OGFR_HUMAN;tr|Q6PK21|Q6PK21_HUMAN;tr|A0A0A0MRN5|A0A0A0MRN5_HUMAN;tr|Q05BV5|Q05BV5_HUMAN;tr|B3KMQ6|B3KMQ6_HUMAN;tr|V9H0E3|V9H0E3_HUMAN;tr|A0A087X028|A0A087X028_HUMAN;tr|V9H0H8|V9H0H8_HUMAN	sp|Q9NZT2|OGFR_HUMAN;tr|Q6PK21|Q6PK21_HUMAN;tr|A0A0A0MRN5|A0A0A0MRN5_HUMAN;tr|Q05BV5|Q05BV5_HUMAN;tr|B3KMQ6|B3KMQ6_HUMAN	sp|Q9NZT2|OGFR_HUMAN Opioid growth factor receptor OS=Homo sapiens OX=9606 GN=OGFR PE=1 SV=3;tr|Q6PK21|Q6PK21_HUMAN OGFR protein OS=Homo sapiens OX=9606 PE=2 SV=1;tr|A0A0A0MRN5|A0A0A0MRN5_HUMAN Opioid growth factor receptor OS=Homo sapiens OX=9606 GN=OGFR	76940000	71125000	67909000	80280000	69492000	64045000	62667000	71967000
sp|Q9P035|HACD3_HUMAN;tr|H3BS72|H3BS72_HUMAN;tr|H3BPZ1|H3BPZ1_HUMAN;tr|H3BMZ1|H3BMZ1_HUMAN;tr|H3BRL8|H3BRL8_HUMAN	sp|Q9P035|HACD3_HUMAN;tr|H3BS72|H3BS72_HUMAN;tr|H3BPZ1|H3BPZ1_HUMAN	sp|Q9P035|HACD3_HUMAN Very-long-chain (3R)-3-hydroxyacyl-CoA dehydratase 3 OS=Homo sapiens OX=9606 GN=HACD3 PE=1 SV=2;tr|H3BS72|H3BS72_HUMAN Very-long-chain (3R)-3-hydroxyacyl-CoA dehydratase OS=Homo sapiens OX=9606 GN=HACD3 PE=1 SV=1;tr|H3BPZ1|H3BPZ1_HUMA	53220000	53863000	60301000	55979000	48821000	42839000	51018000	52465000
sp|Q9P0L0|VAPA_HUMAN;tr|A8KA83|A8KA83_HUMAN;tr|J3QKM9|J3QKM9_HUMAN;tr|E5RK64|E5RK64_HUMAN;tr|Q59EZ6|Q59EZ6_HUMAN;tr|A0A024RC64|A0A024RC64_HUMAN	sp|Q9P0L0|VAPA_HUMAN;tr|A8KA83|A8KA83_HUMAN	sp|Q9P0L0|VAPA_HUMAN Vesicle-associated membrane protein-associated protein A OS=Homo sapiens OX=9606 GN=VAPA PE=1 SV=3;tr|A8KA83|A8KA83_HUMAN cDNA FLJ78586, highly similar to Homo sapiens VAMP (vesicle-associated membrane protein)-associated protein A, 33	355300000	348680000	357710000	371010000	268250000	248190000	273590000	292190000
sp|Q9P1F3|ABRAL_HUMAN;tr|Q5SZC9|Q5SZC9_HUMAN	sp|Q9P1F3|ABRAL_HUMAN	sp|Q9P1F3|ABRAL_HUMAN Costars family protein ABRACL OS=Homo sapiens OX=9606 GN=ABRACL PE=1 SV=1	42850000	51099000	44728000	48325000	47756000	56788000	53018000	49169000
sp|Q9UBB4|ATX10_HUMAN;tr|A0A1W2PQD2|A0A1W2PQD2_HUMAN;tr|Q7Z524|Q7Z524_HUMAN;tr|B1AHE4|B1AHE4_HUMAN;tr|Q9NTC6|Q9NTC6_HUMAN;tr|B1AHE3|B1AHE3_HUMAN	sp|Q9UBB4|ATX10_HUMAN;tr|A0A1W2PQD2|A0A1W2PQD2_HUMAN;tr|Q7Z524|Q7Z524_HUMAN	sp|Q9UBB4|ATX10_HUMAN Ataxin-10 OS=Homo sapiens OX=9606 GN=ATXN10 PE=1 SV=1;tr|A0A1W2PQD2|A0A1W2PQD2_HUMAN Ataxin-10 OS=Homo sapiens OX=9606 GN=ATXN10 PE=1 SV=1;tr|Q7Z524|Q7Z524_HUMAN HUMEEP OS=Homo sapiens OX=9606 PE=2 SV=1	76373000	71226000	69314000	66654000	70900000	74001000	71798000	67314000
sp|Q9UBC2|EP15R_HUMAN;tr|A0A024R7G6|A0A024R7G6_HUMAN;tr|M0R165|M0R165_HUMAN;tr|A8K5P4|A8K5P4_HUMAN;tr|B4DME4|B4DME4_HUMAN;tr|B4DQX5|B4DQX5_HUMAN;tr|A5PKY0|A5PKY0_HUMAN;tr|M0R2S2|M0R2S2_HUMAN;tr|M0R3I1|M0R3I1_HUMAN;tr|Q69YZ4|Q69YZ4_HUMAN;tr|M0R1V5|M0R1V5_HUMAN;tr|K7EJR2|K7EJR2_HUMAN;tr|M0R330|M0R330_HUMAN;tr|M0QX30|M0QX30_HUMAN	sp|Q9UBC2|EP15R_HUMAN;tr|A0A024R7G6|A0A024R7G6_HUMAN;tr|M0R165|M0R165_HUMAN;tr|A8K5P4|A8K5P4_HUMAN;tr|B4DME4|B4DME4_HUMAN;tr|B4DQX5|B4DQX5_HUMAN;tr|A5PKY0|A5PKY0_HUMAN	sp|Q9UBC2|EP15R_HUMAN Epidermal growth factor receptor substrate 15-like 1 OS=Homo sapiens OX=9606 GN=EPS15L1 PE=1 SV=1;tr|A0A024R7G6|A0A024R7G6_HUMAN Epidermal growth factor receptor pathway substrate 15-like 1, isoform CRA_a OS=Homo sapiens OX=9606 GN=EP	55286000	50380000	49449000	54652000	48573000	60668000	54461000	47223000
sp|Q9UBQ5|EIF3K_HUMAN;tr|B4DVD7|B4DVD7_HUMAN;tr|A0A087WVB9|A0A087WVB9_HUMAN;tr|K7ERF1|K7ERF1_HUMAN;tr|K7EQM4|K7EQM4_HUMAN;tr|U3LUI4|U3LUI4_HUMAN;tr|K7EK53|K7EK53_HUMAN;tr|K7ES31|K7ES31_HUMAN;tr|B4DQ48|B4DQ48_HUMAN	sp|Q9UBQ5|EIF3K_HUMAN;tr|B4DVD7|B4DVD7_HUMAN;tr|A0A087WVB9|A0A087WVB9_HUMAN;tr|K7ERF1|K7ERF1_HUMAN;tr|K7EQM4|K7EQM4_HUMAN;tr|U3LUI4|U3LUI4_HUMAN;tr|K7EK53|K7EK53_HUMAN;tr|K7ES31|K7ES31_HUMAN	sp|Q9UBQ5|EIF3K_HUMAN Eukaryotic translation initiation factor 3 subunit K OS=Homo sapiens OX=9606 GN=EIF3K PE=1 SV=1;tr|B4DVD7|B4DVD7_HUMAN Eukaryotic translation initiation factor 3 subunit K OS=Homo sapiens OX=9606 GN=EIF3K PE=2 SV=1;tr|A0A087WVB9|A0A08	135260000	129740000	127800000	130480000	137770000	147390000	135210000	150640000
sp|Q9UBQ7|GRHPR_HUMAN;tr|Q5M7Z5|Q5M7Z5_HUMAN;tr|U3KQ56|U3KQ56_HUMAN	sp|Q9UBQ7|GRHPR_HUMAN;tr|Q5M7Z5|Q5M7Z5_HUMAN;tr|U3KQ56|U3KQ56_HUMAN	sp|Q9UBQ7|GRHPR_HUMAN Glyoxylate reductase/hydroxypyruvate reductase OS=Homo sapiens OX=9606 GN=GRHPR PE=1 SV=1;tr|Q5M7Z5|Q5M7Z5_HUMAN GRHPR protein (Fragment) OS=Homo sapiens OX=9606 GN=GRHPR PE=2 SV=1;tr|U3KQ56|U3KQ56_HUMAN Glyoxylate reductase/hydroxypy	36621000	33723000	44855000	38880000	42672000	44457000	27713000	29728000
sp|Q9UBS4|DJB11_HUMAN;tr|B3KW63|B3KW63_HUMAN;tr|H7C2Y5|H7C2Y5_HUMAN	sp|Q9UBS4|DJB11_HUMAN;tr|B3KW63|B3KW63_HUMAN	sp|Q9UBS4|DJB11_HUMAN DnaJ homolog subfamily B member 11 OS=Homo sapiens OX=9606 GN=DNAJB11 PE=1 SV=1;tr|B3KW63|B3KW63_HUMAN cDNA FLJ42295 fis, clone TLIVE2008213, highly similar to DnaJ homolog subfamily B member 11 OS=Homo sapiens OX=9606 PE=2 SV=1	88626000	74517000	77877000	86379000	75546000	77837000	69983000	75035000
sp|Q9UBT2|SAE2_HUMAN;tr|B2RDF5|B2RDF5_HUMAN;tr|B3KMZ6|B3KMZ6_HUMAN;tr|K7EPL2|K7EPL2_HUMAN;tr|B7Z5X0|B7Z5X0_HUMAN;tr|B3KNA3|B3KNA3_HUMAN;tr|U3KQ93|U3KQ93_HUMAN;tr|K7ESK7|K7ESK7_HUMAN;tr|U3KQ55|U3KQ55_HUMAN;tr|K7ES38|K7ES38_HUMAN	sp|Q9UBT2|SAE2_HUMAN;tr|B2RDF5|B2RDF5_HUMAN;tr|B3KMZ6|B3KMZ6_HUMAN;tr|K7EPL2|K7EPL2_HUMAN	sp|Q9UBT2|SAE2_HUMAN SUMO-activating enzyme subunit 2 OS=Homo sapiens OX=9606 GN=UBA2 PE=1 SV=2;tr|B2RDF5|B2RDF5_HUMAN cDNA, FLJ96587, highly similar to Homo sapiens SUMO-1 activating enzyme subunit 2 (UBA2), mRNA OS=Homo sapiens OX=9606 PE=2 SV=1;tr|B3KMZ	72878000	74729000	64837000	67159000	85897000	85888000	67682000	89551000
sp|Q9UGV2|NDRG3_HUMAN;tr|Q5TH30|Q5TH30_HUMAN;tr|B7Z341|B7Z341_HUMAN;tr|F8WBF9|F8WBF9_HUMAN;tr|B7ZLZ9|B7ZLZ9_HUMAN;tr|B7Z323|B7Z323_HUMAN;tr|Q5TH29|Q5TH29_HUMAN	sp|Q9UGV2|NDRG3_HUMAN;tr|Q5TH30|Q5TH30_HUMAN;tr|B7Z341|B7Z341_HUMAN;tr|F8WBF9|F8WBF9_HUMAN;tr|B7ZLZ9|B7ZLZ9_HUMAN;tr|B7Z323|B7Z323_HUMAN	sp|Q9UGV2|NDRG3_HUMAN Protein NDRG3 OS=Homo sapiens OX=9606 GN=NDRG3 PE=1 SV=2;tr|Q5TH30|Q5TH30_HUMAN NDRG family member 3, isoform CRA_c OS=Homo sapiens OX=9606 GN=NDRG3 PE=1 SV=1;tr|B7Z341|B7Z341_HUMAN cDNA FLJ54521, highly similar to Protein NDRG3 OS=Ho	21281000	23114000	22175000	26191000	28485000	23975000	18802000	20326000
sp|Q9UHB9|SRP68_HUMAN;tr|B4DVI7|B4DVI7_HUMAN;tr|Q96K98|Q96K98_HUMAN;tr|B3KMI9|B3KMI9_HUMAN;tr|Q96K97|Q96K97_HUMAN	sp|Q9UHB9|SRP68_HUMAN;tr|B4DVI7|B4DVI7_HUMAN;tr|Q96K98|Q96K98_HUMAN;tr|B3KMI9|B3KMI9_HUMAN;tr|Q96K97|Q96K97_HUMAN	sp|Q9UHB9|SRP68_HUMAN Signal recognition particle subunit SRP68 OS=Homo sapiens OX=9606 GN=SRP68 PE=1 SV=2;tr|B4DVI7|B4DVI7_HUMAN cDNA FLJ54176, highly similar to Signal recognition particle 68 kDa protein OS=Homo sapiens OX=9606 PE=2 SV=1;tr|Q96K98|Q96K98	105700000	89848000	95597000	104530000	92089000	99550000	103760000	107390000
sp|Q9UHD8|SEPT9_HUMAN;tr|A0A0S2Z5A5|A0A0S2Z5A5_HUMAN;tr|A0A024R8V0|A0A024R8V0_HUMAN;tr|A0A024R8Q0|A0A024R8Q0_HUMAN;tr|A0A0S2Z5W9|A0A0S2Z5W9_HUMAN;tr|Q1WWK5|Q1WWK5_HUMAN;tr|K7EK18|K7EK18_HUMAN;tr|K7EL40|K7EL40_HUMAN;tr|K7ER52|K7ER52_HUMAN;tr|K7EIE4|K7EIE4_HUMAN;tr|K7EQD7|K7EQD7_HUMAN;tr|K7ELJ9|K7ELJ9_HUMAN;tr|K7ER14|K7ER14_HUMAN;tr|B4DTL7|B4DTL7_HUMAN;tr|K7EJV0|K7EJV0_HUMAN;tr|K7EJ51|K7EJ51_HUMAN;…	sp|Q9UHD8|SEPT9_HUMAN;tr|A0A0S2Z5A5|A0A0S2Z5A5_HUMAN;tr|A0A024R8V0|A0A024R8V0_HUMAN;tr|A0A024R8Q0|A0A024R8Q0_HUMAN;tr|A0A0S2Z5W9|A0A0S2Z5W9_HUMAN	sp|Q9UHD8|SEPT9_HUMAN Septin-9 OS=Homo sapiens OX=9606 GN=SEPT9 PE=1 SV=2;tr|A0A0S2Z5A5|A0A0S2Z5A5_HUMAN Septin 9 isoform 1 (Fragment) OS=Homo sapiens OX=9606 GN=SEPT9 PE=2 SV=1;tr|A0A024R8V0|A0A024R8V0_HUMAN Septin 9, isoform CRA_a OS=Homo sapiens OX=9606	324830000	302570000	306200000	329750000	307550000	276510000	273780000	273270000
sp|Q9UI26|IPO11_HUMAN;tr|F8WDV0|F8WDV0_HUMAN;tr|B3KN03|B3KN03_HUMAN;tr|D6RCQ2|D6RCQ2_HUMAN;tr|E7EMB7|E7EMB7_HUMAN;tr|D6RCN7|D6RCN7_HUMAN;tr|D6RJB1|D6RJB1_HUMAN;tr|Q5HY91|Q5HY91_HUMAN	sp|Q9UI26|IPO11_HUMAN;tr|F8WDV0|F8WDV0_HUMAN;tr|B3KN03|B3KN03_HUMAN	sp|Q9UI26|IPO11_HUMAN Importin-11 OS=Homo sapiens OX=9606 GN=IPO11 PE=1 SV=1;tr|F8WDV0|F8WDV0_HUMAN Importin-11 OS=Homo sapiens OX=9606 GN=IPO11 PE=1 SV=1;tr|B3KN03|B3KN03_HUMAN cDNA FLJ13115 fis, clone NT2RP3002631, highly similar to Importin-11 OS=Homo s	27819000	32104000	31042000	32174000	23157000	31830000	28363000	39155000
sp|Q9UJ70|NAGK_HUMAN;tr|C9JEV6|C9JEV6_HUMAN;tr|H7C3G9|H7C3G9_HUMAN;tr|H7C286|H7C286_HUMAN;tr|E9PPU6|E9PPU6_HUMAN;tr|H0YEB7|H0YEB7_HUMAN;tr|H7C1L7|H7C1L7_HUMAN;tr|H0YE82|H0YE82_HUMAN;tr|H0YC94|H0YC94_HUMAN	sp|Q9UJ70|NAGK_HUMAN;tr|C9JEV6|C9JEV6_HUMAN;tr|H7C3G9|H7C3G9_HUMAN;tr|H7C286|H7C286_HUMAN;tr|E9PPU6|E9PPU6_HUMAN;tr|H0YEB7|H0YEB7_HUMAN	sp|Q9UJ70|NAGK_HUMAN N-acetyl-D-glucosamine kinase OS=Homo sapiens OX=9606 GN=NAGK PE=1 SV=4;tr|C9JEV6|C9JEV6_HUMAN N-acetyl-D-glucosamine kinase OS=Homo sapiens OX=9606 GN=NAGK PE=1 SV=3;tr|H7C3G9|H7C3G9_HUMAN N-acetyl-D-glucosamine kinase OS=Homo sapiens	32770000	35466000	38204000	34601000	32816000	35611000	27775000	31675000
sp|Q9UJA5|TRM6_HUMAN	sp|Q9UJA5|TRM6_HUMAN	sp|Q9UJA5|TRM6_HUMAN tRNA (adenine(58)-N(1))-methyltransferase non-catalytic subunit TRM6 OS=Homo sapiens OX=9606 GN=TRMT6 PE=1 SV=1	21742000	21134000	23695000	21604000	25159000	20484000	22545000	24556000
sp|Q9UJU6|DBNL_HUMAN;tr|Q59FH4|Q59FH4_HUMAN;tr|H0Y5J4|H0Y5J4_HUMAN;tr|B4DDU5|B4DDU5_HUMAN;tr|B4DKZ4|B4DKZ4_HUMAN;tr|F8WBG8|F8WBG8_HUMAN;tr|B4DNX5|B4DNX5_HUMAN;tr|F8WC20|F8WC20_HUMAN;tr|F8WBB2|F8WBB2_HUMAN;tr|F8WFE1|F8WFE1_HUMAN;tr|F2Z2V3|F2Z2V3_HUMAN;tr|F8WB73|F8WB73_HUMAN;tr|F8WCK3|F8WCK3_HUMAN;tr|F2Z3E3|F2Z3E3_HUMAN	sp|Q9UJU6|DBNL_HUMAN;tr|Q59FH4|Q59FH4_HUMAN;tr|H0Y5J4|H0Y5J4_HUMAN;tr|B4DDU5|B4DDU5_HUMAN;tr|B4DKZ4|B4DKZ4_HUMAN	sp|Q9UJU6|DBNL_HUMAN Drebrin-like protein OS=Homo sapiens OX=9606 GN=DBNL PE=1 SV=1;tr|Q59FH4|Q59FH4_HUMAN Drebrin-like protein variant (Fragment) OS=Homo sapiens OX=9606 PE=2 SV=1;tr|H0Y5J4|H0Y5J4_HUMAN Drebrin-like protein (Fragment) OS=Homo sapiens OX=9	74400000	69523000	67964000	65586000	73997000	69454000	63564000	86121000
sp|Q9UJZ1|STML2_HUMAN;tr|A0A087WYB4|A0A087WYB4_HUMAN;tr|Q6ZNW0|Q6ZNW0_HUMAN;tr|F2Z2I8|F2Z2I8_HUMAN	sp|Q9UJZ1|STML2_HUMAN;tr|A0A087WYB4|A0A087WYB4_HUMAN;tr|Q6ZNW0|Q6ZNW0_HUMAN	sp|Q9UJZ1|STML2_HUMAN Stomatin-like protein 2, mitochondrial OS=Homo sapiens OX=9606 GN=STOML2 PE=1 SV=1;tr|A0A087WYB4|A0A087WYB4_HUMAN Stomatin-like protein 2, mitochondrial OS=Homo sapiens OX=9606 GN=STOML2 PE=1 SV=1;tr|Q6ZNW0|Q6ZNW0_HUMAN cDNA FLJ27036	183340000	179010000	160220000	169860000	200490000	187740000	185740000	188310000
sp|Q9UK76|JUPI1_HUMAN;tr|J3KT51|J3KT51_HUMAN;tr|J3KSH8|J3KSH8_HUMAN;tr|F2Z3M5|F2Z3M5_HUMAN	sp|Q9UK76|JUPI1_HUMAN;tr|J3KT51|J3KT51_HUMAN	sp|Q9UK76|JUPI1_HUMAN Jupiter microtubule associated homolog 1 OS=Homo sapiens OX=9606 GN=JPT1 PE=1 SV=3;tr|J3KT51|J3KT51_HUMAN Jupiter microtubule-associated homolog 1 OS=Homo sapiens OX=9606 GN=JPT1 PE=1 SV=1	352010000	322820000	312490000	352760000	405540000	393970000	333430000	370230000
sp|Q9UKK9|NUDT5_HUMAN;tr|A6NFX8|A6NFX8_HUMAN;tr|A6NJU6|A6NJU6_HUMAN;tr|A6NCQ0|A6NCQ0_HUMAN;tr|H0YEY4|H0YEY4_HUMAN;tr|C9JYY9|C9JYY9_HUMAN	sp|Q9UKK9|NUDT5_HUMAN;tr|A6NFX8|A6NFX8_HUMAN;tr|A6NJU6|A6NJU6_HUMAN;tr|A6NCQ0|A6NCQ0_HUMAN	sp|Q9UKK9|NUDT5_HUMAN ADP-sugar pyrophosphatase OS=Homo sapiens OX=9606 GN=NUDT5 PE=1 SV=1;tr|A6NFX8|A6NFX8_HUMAN ADP-sugar pyrophosphatase OS=Homo sapiens OX=9606 GN=NUDT5 PE=1 SV=1;tr|A6NJU6|A6NJU6_HUMAN ADP-sugar pyrophosphatase OS=Homo sapiens OX=9606	266520000	249810000	248630000	258160000	320100000	296830000	317500000	335580000
sp|Q9UKM9|RALY_HUMAN;tr|Q5QPL9|Q5QPL9_HUMAN;tr|Q5QPM0|Q5QPM0_HUMAN;tr|Q5QPM1|Q5QPM1_HUMAN;tr|B4DSJ1|B4DSJ1_HUMAN;tr|Q5QPM2|Q5QPM2_HUMAN	sp|Q9UKM9|RALY_HUMAN;tr|Q5QPL9|Q5QPL9_HUMAN;tr|Q5QPM0|Q5QPM0_HUMAN;tr|Q5QPM1|Q5QPM1_HUMAN	sp|Q9UKM9|RALY_HUMAN RNA-binding protein Raly OS=Homo sapiens OX=9606 GN=RALY PE=1 SV=1;tr|Q5QPL9|Q5QPL9_HUMAN RNA-binding protein Raly (Fragment) OS=Homo sapiens OX=9606 GN=RALY PE=1 SV=1;tr|Q5QPM0|Q5QPM0_HUMAN RNA-binding protein Raly (Fragment) OS=Homo	209790000	211940000	197810000	201010000	197410000	178510000	168810000	200130000
sp|Q9UKY7|CDV3_HUMAN;tr|D3DND1|D3DND1_HUMAN;tr|H0Y8K3|H0Y8K3_HUMAN;tr|D6R9V8|D6R9V8_HUMAN;tr|D6RFH2|D6RFH2_HUMAN;tr|D6RAV0|D6RAV0_HUMAN;tr|D6RDN0|D6RDN0_HUMAN;tr|D6R973|D6R973_HUMAN	sp|Q9UKY7|CDV3_HUMAN;tr|D3DND1|D3DND1_HUMAN;tr|H0Y8K3|H0Y8K3_HUMAN	sp|Q9UKY7|CDV3_HUMAN Protein CDV3 homolog OS=Homo sapiens OX=9606 GN=CDV3 PE=1 SV=1;tr|D3DND1|D3DND1_HUMAN CDV3 homolog (Mouse), isoform CRA_a OS=Homo sapiens OX=9606 GN=CDV3 PE=4 SV=1;tr|H0Y8K3|H0Y8K3_HUMAN Protein CDV3 homolog (Fragment) OS=Homo sapiens	275890000	248240000	230120000	252860000	287200000	290010000	270660000	281440000
sp|Q9ULC4|MCTS1_HUMAN	sp|Q9ULC4|MCTS1_HUMAN	sp|Q9ULC4|MCTS1_HUMAN Malignant T-cell-amplified sequence 1 OS=Homo sapiens OX=9606 GN=MCTS1 PE=1 SV=1	82038000	90315000	71685000	78908000	76882000	91932000	78927000	71738000
sp|Q9UMS4|PRP19_HUMAN;tr|F5GY56|F5GY56_HUMAN;tr|H0YGF3|H0YGF3_HUMAN;tr|F5H2I0|F5H2I0_HUMAN;tr|H0YGZ5|H0YGZ5_HUMAN	sp|Q9UMS4|PRP19_HUMAN;tr|F5GY56|F5GY56_HUMAN	sp|Q9UMS4|PRP19_HUMAN Pre-mRNA-processing factor 19 OS=Homo sapiens OX=9606 GN=PRPF19 PE=1 SV=1;tr|F5GY56|F5GY56_HUMAN Pre-mRNA-processing factor 19 (Fragment) OS=Homo sapiens OX=9606 GN=PRPF19 PE=1 SV=1	541970000	530430000	507460000	511590000	593430000	582560000	564120000	603570000
sp|Q9UMX0|UBQL1_HUMAN;tr|B3KNI8|B3KNI8_HUMAN;tr|B3KNI2|B3KNI2_HUMAN;tr|A0A024R258|A0A024R258_HUMAN;tr|Q59FJ2|Q59FJ2_HUMAN;tr|H0YDS0|H0YDS0_HUMAN;tr|H0YEZ9|H0YEZ9_HUMAN	sp|Q9UMX0|UBQL1_HUMAN;tr|B3KNI8|B3KNI8_HUMAN;tr|B3KNI2|B3KNI2_HUMAN;tr|A0A024R258|A0A024R258_HUMAN	sp|Q9UMX0|UBQL1_HUMAN Ubiquilin-1 OS=Homo sapiens OX=9606 GN=UBQLN1 PE=1 SV=2;tr|B3KNI8|B3KNI8_HUMAN cDNA FLJ14670 fis, clone NT2RP2003272, highly similar to Ubiquilin-1 OS=Homo sapiens OX=9606 PE=2 SV=1;tr|B3KNI2|B3KNI2_HUMAN cDNA FLJ14650 fis, clone NT2R	152380000	131920000	143950000	165620000	152350000	152480000	126800000	145420000
sp|Q9UNS2|CSN3_HUMAN;tr|B4DN01|B4DN01_HUMAN;tr|H7C3P9|H7C3P9_HUMAN;tr|J3QKR0|J3QKR0_HUMAN;tr|C9JLV5|C9JLV5_HUMAN;tr|J3QL22|J3QL22_HUMAN;tr|J3QS85|J3QS85_HUMAN;tr|J3KTQ1|J3KTQ1_HUMAN;tr|K7ES36|K7ES36_HUMAN	sp|Q9UNS2|CSN3_HUMAN;tr|B4DN01|B4DN01_HUMAN;tr|H7C3P9|H7C3P9_HUMAN	sp|Q9UNS2|CSN3_HUMAN COP9 signalosome complex subunit 3 OS=Homo sapiens OX=9606 GN=COPS3 PE=1 SV=3;tr|B4DN01|B4DN01_HUMAN cDNA FLJ57332, highly similar to COP9 signalosome complex subunit 3 OS=Homo sapiens OX=9606 PE=2 SV=1;tr|H7C3P9|H7C3P9_HUMAN COP9 sign	34554000	37861000	26045000	24416000	34736000	33912000	32355000	27968000
sp|Q9UNZ2|NSF1C_HUMAN;tr|Q53FE8|Q53FE8_HUMAN;tr|Q53FF5|Q53FF5_HUMAN;tr|F2Z2K0|F2Z2K0_HUMAN;tr|R4GNE6|R4GNE6_HUMAN;tr|Q6ZQU3|Q6ZQU3_HUMAN;tr|G3V4V8|G3V4V8_HUMAN;tr|R4GMY2|R4GMY2_HUMAN	sp|Q9UNZ2|NSF1C_HUMAN;tr|Q53FE8|Q53FE8_HUMAN;tr|Q53FF5|Q53FF5_HUMAN;tr|F2Z2K0|F2Z2K0_HUMAN	sp|Q9UNZ2|NSF1C_HUMAN NSFL1 cofactor p47 OS=Homo sapiens OX=9606 GN=NSFL1C PE=1 SV=2;tr|Q53FE8|Q53FE8_HUMAN cDNA FLJ36526 fis, clone TRACH2003347, highly similar to NSFL1 cofactor p47 (Fragment) OS=Homo sapiens OX=9606 PE=2 SV=1;tr|Q53FF5|Q53FF5_HUMAN p47	177290000	167070000	185550000	172060000	199940000	216210000	189530000	206740000
sp|Q9Y230|RUVB2_HUMAN;tr|B3KNL2|B3KNL2_HUMAN;tr|M0R0Y3|M0R0Y3_HUMAN;tr|B4DW30|B4DW30_HUMAN;tr|X6R2L4|X6R2L4_HUMAN;tr|M0QXI6|M0QXI6_HUMAN;tr|M0R0Z0|M0R0Z0_HUMAN;tr|M0QXZ7|M0QXZ7_HUMAN;tr|A0A1W2PS48|A0A1W2PS48_HUMAN	sp|Q9Y230|RUVB2_HUMAN;tr|B3KNL2|B3KNL2_HUMAN;tr|M0R0Y3|M0R0Y3_HUMAN	sp|Q9Y230|RUVB2_HUMAN RuvB-like 2 OS=Homo sapiens OX=9606 GN=RUVBL2 PE=1 SV=3;tr|B3KNL2|B3KNL2_HUMAN RuvB-like helicase OS=Homo sapiens OX=9606 GN=RUVBL2 PE=2 SV=1;tr|M0R0Y3|M0R0Y3_HUMAN RuvB-like helicase OS=Homo sapiens OX=9606 GN=RUVBL2 PE=1 SV=1	259350000	246060000	246750000	245090000	283280000	258670000	255510000	264580000
sp|Q9Y237|PIN4_HUMAN;tr|H0Y4T6|H0Y4T6_HUMAN;tr|J3KMW3|J3KMW3_HUMAN;tr|H0Y8P6|H0Y8P6_HUMAN;tr|H0Y610|H0Y610_HUMAN	sp|Q9Y237|PIN4_HUMAN;tr|H0Y4T6|H0Y4T6_HUMAN;tr|J3KMW3|J3KMW3_HUMAN;tr|H0Y8P6|H0Y8P6_HUMAN;tr|H0Y610|H0Y610_HUMAN	sp|Q9Y237|PIN4_HUMAN Peptidyl-prolyl cis-trans isomerase NIMA-interacting 4 OS=Homo sapiens OX=9606 GN=PIN4 PE=1 SV=1;tr|H0Y4T6|H0Y4T6_HUMAN Peptidyl-prolyl cis-trans isomerase NIMA-interacting 4 (Fragment) OS=Homo sapiens OX=9606 GN=PIN4 PE=1 SV=1;tr|J3KM	24898000	27092000	25135000	29369000	22669000	23364000	22280000	25487000
sp|Q9Y262|EIF3L_HUMAN;tr|B0QY89|B0QY89_HUMAN;tr|B4DQF6|B4DQF6_HUMAN;tr|B3KPB9|B3KPB9_HUMAN;tr|B0QY90|B0QY90_HUMAN;tr|B4DEH4|B4DEH4_HUMAN;tr|B3KNG0|B3KNG0_HUMAN;tr|C9JHP4|C9JHP4_HUMAN;tr|C9K0Q7|C9K0Q7_HUMAN;tr|Q8N7H0|Q8N7H0_HUMAN;tr|Q7Z5X3|Q7Z5X3_HUMAN;tr|H7C3A0|H7C3A0_HUMAN;tr|H0Y7E6|H0Y7E6_HUMAN	sp|Q9Y262|EIF3L_HUMAN;tr|B0QY89|B0QY89_HUMAN;tr|B4DQF6|B4DQF6_HUMAN;tr|B3KPB9|B3KPB9_HUMAN;tr|B0QY90|B0QY90_HUMAN	sp|Q9Y262|EIF3L_HUMAN Eukaryotic translation initiation factor 3 subunit L OS=Homo sapiens OX=9606 GN=EIF3L PE=1 SV=1;tr|B0QY89|B0QY89_HUMAN Eukaryotic translation initiation factor 3 subunit L OS=Homo sapiens OX=9606 GN=EIF3L PE=1 SV=1;tr|B4DQF6|B4DQF6_HU	554620000	553080000	520830000	536430000	632650000	628130000	586240000	635740000
sp|Q9Y263|PLAP_HUMAN;tr|E5RIM3|E5RIM3_HUMAN;tr|H0YBW4|H0YBW4_HUMAN;tr|H0YAU9|H0YAU9_HUMAN;tr|H0YC16|H0YC16_HUMAN	sp|Q9Y263|PLAP_HUMAN;tr|E5RIM3|E5RIM3_HUMAN	sp|Q9Y263|PLAP_HUMAN Phospholipase A-2-activating protein OS=Homo sapiens OX=9606 GN=PLAA PE=1 SV=2;tr|E5RIM3|E5RIM3_HUMAN Phospholipase A-2-activating protein OS=Homo sapiens OX=9606 GN=PLAA PE=1 SV=1	40189000	47790000	45151000	48393000	40931000	39176000	48325000	44097000
sp|Q9Y266|NUDC_HUMAN;tr|Q9H2R7|Q9H2R7_HUMAN;tr|A0A0A0MSU9|A0A0A0MSU9_HUMAN;tr|A0A0A0MSS4|A0A0A0MSS4_HUMAN	sp|Q9Y266|NUDC_HUMAN;tr|Q9H2R7|Q9H2R7_HUMAN	sp|Q9Y266|NUDC_HUMAN Nuclear migration protein nudC OS=Homo sapiens OX=9606 GN=NUDC PE=1 SV=1;tr|Q9H2R7|Q9H2R7_HUMAN NPD011 OS=Homo sapiens OX=9606 GN=NPD011 PE=2 SV=1	507950000	498020000	519820000	555960000	360790000	404630000	426660000	494180000
sp|Q9Y277|VDAC3_HUMAN;tr|E5RFP6|E5RFP6_HUMAN;tr|E5RJN6|E5RJN6_HUMAN;tr|E5RHZ6|E5RHZ6_HUMAN;tr|E5RHE1|E5RHE1_HUMAN;tr|E5RK27|E5RK27_HUMAN;tr|E5RFL1|E5RFL1_HUMAN	sp|Q9Y277|VDAC3_HUMAN;tr|E5RFP6|E5RFP6_HUMAN;tr|E5RJN6|E5RJN6_HUMAN;tr|E5RHZ6|E5RHZ6_HUMAN;tr|E5RHE1|E5RHE1_HUMAN;tr|E5RK27|E5RK27_HUMAN	sp|Q9Y277|VDAC3_HUMAN Voltage-dependent anion-selective channel protein 3 OS=Homo sapiens OX=9606 GN=VDAC3 PE=1 SV=1;tr|E5RFP6|E5RFP6_HUMAN Voltage-dependent anion-selective channel protein 3 OS=Homo sapiens OX=9606 GN=VDAC3 PE=1 SV=1;tr|E5RJN6|E5RJN6_HUMA	40259000	34469000	36378000	35887000	40638000	39770000	41022000	40519000
sp|Q9Y295|DRG1_HUMAN;tr|Q9UFA5|Q9UFA5_HUMAN;tr|F8WEE0|F8WEE0_HUMAN	sp|Q9Y295|DRG1_HUMAN	sp|Q9Y295|DRG1_HUMAN Developmentally-regulated GTP-binding protein 1 OS=Homo sapiens OX=9606 GN=DRG1 PE=1 SV=1	11641000	18179000	15237000	18065000	17700000	21110000	18630000	18963000
sp|Q9Y2B0|CNPY2_HUMAN;tr|F8VXJ7|F8VXJ7_HUMAN;tr|F8W1K5|F8W1K5_HUMAN;tr|H0YI18|H0YI18_HUMAN;tr|H0YIH9|H0YIH9_HUMAN;tr|F8W1U5|F8W1U5_HUMAN	sp|Q9Y2B0|CNPY2_HUMAN;tr|F8VXJ7|F8VXJ7_HUMAN;tr|F8W1K5|F8W1K5_HUMAN;tr|H0YI18|H0YI18_HUMAN	sp|Q9Y2B0|CNPY2_HUMAN Protein canopy homolog 2 OS=Homo sapiens OX=9606 GN=CNPY2 PE=1 SV=1;tr|F8VXJ7|F8VXJ7_HUMAN Protein canopy homolog 2 (Fragment) OS=Homo sapiens OX=9606 GN=CNPY2 PE=1 SV=1;tr|F8W1K5|F8W1K5_HUMAN Protein canopy homolog 2 (Fragment) OS=Ho	28691000	43275000	44353000	30899000	27278000	27379000	33782000	19978000
sp|Q9Y2V2|CHSP1_HUMAN;tr|H3BSW7|H3BSW7_HUMAN;tr|H3BUY4|H3BUY4_HUMAN;tr|H3BPY5|H3BPY5_HUMAN;tr|H3BNU9|H3BNU9_HUMAN;tr|H3BTK3|H3BTK3_HUMAN;tr|I3L3X8|I3L3X8_HUMAN	sp|Q9Y2V2|CHSP1_HUMAN;tr|H3BSW7|H3BSW7_HUMAN;tr|H3BUY4|H3BUY4_HUMAN;tr|H3BPY5|H3BPY5_HUMAN;tr|H3BNU9|H3BNU9_HUMAN	sp|Q9Y2V2|CHSP1_HUMAN Calcium-regulated heat-stable protein 1 OS=Homo sapiens OX=9606 GN=CARHSP1 PE=1 SV=2;tr|H3BSW7|H3BSW7_HUMAN Calcium-regulated heat-stable protein 1 (Fragment) OS=Homo sapiens OX=9606 GN=CARHSP1 PE=1 SV=1;tr|H3BUY4|H3BUY4_HUMAN Calcium	51681000	47705000	53092000	54655000	53028000	62643000	60357000	58172000
sp|Q9Y2W1|TR150_HUMAN;tr|B0AZU3|B0AZU3_HUMAN;tr|H0YF14|H0YF14_HUMAN	sp|Q9Y2W1|TR150_HUMAN	sp|Q9Y2W1|TR150_HUMAN Thyroid hormone receptor-associated protein 3 OS=Homo sapiens OX=9606 GN=THRAP3 PE=1 SV=2	202490000	174480000	187340000	195920000	198010000	175610000	185460000	196730000
sp|Q9Y2X3|NOP58_HUMAN;tr|B3KN82|B3KN82_HUMAN;tr|B4DUY3|B4DUY3_HUMAN;tr|H7BZ72|H7BZ72_HUMAN	sp|Q9Y2X3|NOP58_HUMAN;tr|B3KN82|B3KN82_HUMAN	sp|Q9Y2X3|NOP58_HUMAN Nucleolar protein 58 OS=Homo sapiens OX=9606 GN=NOP58 PE=1 SV=1;tr|B3KN82|B3KN82_HUMAN cDNA FLJ13913 fis, clone Y79AA1000231, highly similar to Nucleolar protein NOP5 OS=Homo sapiens OX=9606 PE=2 SV=1	67202000	67641000	79001000	83294000	55236000	66987000	76287000	74153000
sp|Q9Y305|ACOT9_HUMAN;tr|H7C5Q2|H7C5Q2_HUMAN;tr|Q9H2R8|Q9H2R8_HUMAN;tr|C9J7L8|C9J7L8_HUMAN;tr|Q96EA2|Q96EA2_HUMAN	sp|Q9Y305|ACOT9_HUMAN;tr|H7C5Q2|H7C5Q2_HUMAN	sp|Q9Y305|ACOT9_HUMAN Acyl-coenzyme A thioesterase 9, mitochondrial OS=Homo sapiens OX=9606 GN=ACOT9 PE=1 SV=2;tr|H7C5Q2|H7C5Q2_HUMAN Acyl-coenzyme A thioesterase 9, mitochondrial (Fragment) OS=Homo sapiens OX=9606 GN=ACOT9 PE=1 SV=1	38084000	47392000	49450000	43847000	33293000	26706000	35030000	28726000
sp|Q9Y333|LSM2_HUMAN	sp|Q9Y333|LSM2_HUMAN	sp|Q9Y333|LSM2_HUMAN U6 snRNA-associated Sm-like protein LSm2 OS=Homo sapiens OX=9606 GN=LSM2 PE=1 SV=1	101390000	91063000	89489000	74060000	105540000	116200000	102950000	112170000
sp|Q9Y383|LC7L2_HUMAN;tr|B3KSL5|B3KSL5_HUMAN;tr|A0A0A6YYJ8|A0A0A6YYJ8_HUMAN;tr|B3KRR1|B3KRR1_HUMAN;tr|Q75M91|Q75M91_HUMAN;tr|V9GZ75|V9GZ75_HUMAN;tr|F8WEU3|F8WEU3_HUMAN;tr|B3KSP8|B3KSP8_HUMAN	sp|Q9Y383|LC7L2_HUMAN;tr|B3KSL5|B3KSL5_HUMAN;tr|A0A0A6YYJ8|A0A0A6YYJ8_HUMAN;tr|B3KRR1|B3KRR1_HUMAN	sp|Q9Y383|LC7L2_HUMAN Putative RNA-binding protein Luc7-like 2 OS=Homo sapiens OX=9606 GN=LUC7L2 PE=1 SV=2;tr|B3KSL5|B3KSL5_HUMAN cDNA FLJ36545 fis, clone TRACH2006670, highly similar to RNA-binding protein Luc7-like 2 OS=Homo sapiens OX=9606 PE=2 SV=1;tr|	96477000	88853000	89604000	90879000	116700000	105080000	100130000	110130000
sp|Q9Y3F4|STRAP_HUMAN;tr|B0AZV0|B0AZV0_HUMAN;tr|H0YH33|H0YH33_HUMAN	sp|Q9Y3F4|STRAP_HUMAN;tr|B0AZV0|B0AZV0_HUMAN	sp|Q9Y3F4|STRAP_HUMAN Serine-threonine kinase receptor-associated protein OS=Homo sapiens OX=9606 GN=STRAP PE=1 SV=1;tr|B0AZV0|B0AZV0_HUMAN cDNA, FLJ79540, highly similar to Serine-threonine kinase receptor-associatedprotein OS=Homo sapiens OX=9606 PE=2 SV	265510000	267730000	261520000	253150000	289320000	317100000	292360000	307040000
sp|Q9Y3I0|RTCB_HUMAN;tr|B4DNA0|B4DNA0_HUMAN;tr|B4DNG5|B4DNG5_HUMAN;tr|B4DXF1|B4DXF1_HUMAN	sp|Q9Y3I0|RTCB_HUMAN;tr|B4DNA0|B4DNA0_HUMAN	sp|Q9Y3I0|RTCB_HUMAN tRNA-splicing ligase RtcB homolog OS=Homo sapiens OX=9606 GN=RTCB PE=1 SV=1;tr|B4DNA0|B4DNA0_HUMAN cDNA FLJ58027 OS=Homo sapiens OX=9606 PE=2 SV=1	289950000	272080000	278540000	280590000	264240000	293710000	272550000	262440000
sp|Q9Y3U8|RL36_HUMAN;tr|J3QSB5|J3QSB5_HUMAN;tr|J3KTD3|J3KTD3_HUMAN	sp|Q9Y3U8|RL36_HUMAN;tr|J3QSB5|J3QSB5_HUMAN	sp|Q9Y3U8|RL36_HUMAN 60S ribosomal protein L36 OS=Homo sapiens OX=9606 GN=RPL36 PE=1 SV=3;tr|J3QSB5|J3QSB5_HUMAN 60S ribosomal protein L36 OS=Homo sapiens OX=9606 GN=RPL36 PE=1 SV=1	164450000	155420000	179560000	161960000	143690000	151380000	165250000	174440000
sp|Q9Y3Z3|SAMH1_HUMAN;tr|Q59H15|Q59H15_HUMAN;tr|A6NDZ3|A6NDZ3_HUMAN	sp|Q9Y3Z3|SAMH1_HUMAN	sp|Q9Y3Z3|SAMH1_HUMAN Deoxynucleoside triphosphate triphosphohydrolase SAMHD1 OS=Homo sapiens OX=9606 GN=SAMHD1 PE=1 SV=2	56613000	49865000	58461000	47482000	62600000	51397000	59215000	61998000
sp|Q9Y490|TLN1_HUMAN;tr|A0A1S5UZ07|A0A1S5UZ07_HUMAN;tr|H0YMT1|H0YMT1_HUMAN;tr|A0A1B0GVU7|A0A1B0GVU7_HUMAN;tr|G1UI21|G1UI21_HUMAN;tr|B4DGF3|B4DGF3_HUMAN	sp|Q9Y490|TLN1_HUMAN;tr|A0A1S5UZ07|A0A1S5UZ07_HUMAN	sp|Q9Y490|TLN1_HUMAN Talin-1 OS=Homo sapiens OX=9606 GN=TLN1 PE=1 SV=3;tr|A0A1S5UZ07|A0A1S5UZ07_HUMAN Talin-1 OS=Homo sapiens OX=9606 GN=TLN1 PE=2 SV=1	3260100000	3024500000	2950600000	2947600000	3313600000	3305500000	3105700000	2972600000
sp|Q9Y4L1|HYOU1_HUMAN;tr|A0A087X054|A0A087X054_HUMAN;tr|B7Z2N4|B7Z2N4_HUMAN;tr|B3KXH0|B3KXH0_HUMAN;tr|B7Z766|B7Z766_HUMAN;tr|E9PJ21|E9PJ21_HUMAN;tr|Q05D91|Q05D91_HUMAN;tr|A0A087WWI4|A0A087WWI4_HUMAN;tr|Q6IN67|Q6IN67_HUMAN;tr|K7EQK2|K7EQK2_HUMAN;tr|B7Z602|B7Z602_HUMAN;tr|A0A024R3G0|A0A024R3G0_HUMAN;tr|J3KTF1|J3KTF1_HUMAN;tr|Q68D25|Q68D25_HUMAN;tr|J3QL06|J3QL06_HUMAN;tr|A0A087X214|A0A087X214_HUMAN;…	sp|Q9Y4L1|HYOU1_HUMAN;tr|A0A087X054|A0A087X054_HUMAN;tr|B7Z2N4|B7Z2N4_HUMAN;tr|B3KXH0|B3KXH0_HUMAN;tr|B7Z766|B7Z766_HUMAN;tr|E9PJ21|E9PJ21_HUMAN;tr|Q05D91|Q05D91_HUMAN;tr|A0A087WWI4|A0A087WWI4_HUMAN;tr|Q6IN67|Q6IN67_HUMAN;tr|K7EQK2|K7EQK2_HUMAN;tr|B7Z602|B7Z602_HUMAN	sp|Q9Y4L1|HYOU1_HUMAN Hypoxia up-regulated protein 1 OS=Homo sapiens OX=9606 GN=HYOU1 PE=1 SV=1;tr|A0A087X054|A0A087X054_HUMAN Hypoxia up-regulated protein 1 OS=Homo sapiens OX=9606 GN=HYOU1 PE=1 SV=1;tr|B7Z2N4|B7Z2N4_HUMAN cDNA FLJ56074, highly similar to	899230000	868700000	855520000	846110000	748710000	792100000	749050000	740370000
sp|Q9Y5B9|SP16H_HUMAN;tr|Q0VGA3|Q0VGA3_HUMAN;tr|G3V5A4|G3V5A4_HUMAN;tr|G3V401|G3V401_HUMAN;tr|G3V2X0|G3V2X0_HUMAN	sp|Q9Y5B9|SP16H_HUMAN	sp|Q9Y5B9|SP16H_HUMAN FACT complex subunit SPT16 OS=Homo sapiens OX=9606 GN=SUPT16H PE=1 SV=1	290110000	279160000	293560000	301600000	337490000	309080000	298540000	317710000
sp|Q9Y5K6|CD2AP_HUMAN	sp|Q9Y5K6|CD2AP_HUMAN	sp|Q9Y5K6|CD2AP_HUMAN CD2-associated protein OS=Homo sapiens OX=9606 GN=CD2AP PE=1 SV=1	104870000	95630000	97181000	106430000	115930000	124150000	119150000	125740000
sp|Q9Y5U9|IR3IP_HUMAN;tr|A0A1W2PNR9|A0A1W2PNR9_HUMAN	sp|Q9Y5U9|IR3IP_HUMAN;tr|A0A1W2PNR9|A0A1W2PNR9_HUMAN	sp|Q9Y5U9|IR3IP_HUMAN Immediate early response 3-interacting protein 1 OS=Homo sapiens OX=9606 GN=IER3IP1 PE=1 SV=1;tr|A0A1W2PNR9|A0A1W2PNR9_HUMAN Immediate early response 3-interacting protein 1 OS=Homo sapiens OX=9606 GN=IER3IP1 PE=1 SV=1	28475000	27519000	28292000	32290000	26362000	30264000	24919000	25511000
sp|Q9Y5Z4|HEBP2_HUMAN;tr|Q05DB4|Q05DB4_HUMAN;tr|Q5THN1|Q5THN1_HUMAN;tr|C9IZA0|C9IZA0_HUMAN	sp|Q9Y5Z4|HEBP2_HUMAN;tr|Q05DB4|Q05DB4_HUMAN	sp|Q9Y5Z4|HEBP2_HUMAN Heme-binding protein 2 OS=Homo sapiens OX=9606 GN=HEBP2 PE=1 SV=1;tr|Q05DB4|Q05DB4_HUMAN HEBP2 protein (Fragment) OS=Homo sapiens OX=9606 GN=HEBP2 PE=2 SV=1	33737000	33528000	24487000	24217000	25798000	31875000	23964000	28896000
sp|Q9Y678|COPG1_HUMAN;tr|Q8WUI6|Q8WUI6_HUMAN;tr|B3KW21|B3KW21_HUMAN;tr|H0Y8X7|H0Y8X7_HUMAN;tr|H0Y8G2|H0Y8G2_HUMAN;tr|D6RG17|D6RG17_HUMAN	sp|Q9Y678|COPG1_HUMAN;tr|Q8WUI6|Q8WUI6_HUMAN;tr|B3KW21|B3KW21_HUMAN	sp|Q9Y678|COPG1_HUMAN Coatomer subunit gamma-1 OS=Homo sapiens OX=9606 GN=COPG1 PE=1 SV=1;tr|Q8WUI6|Q8WUI6_HUMAN COPG protein (Fragment) OS=Homo sapiens OX=9606 GN=COPG PE=2 SV=2;tr|B3KW21|B3KW21_HUMAN cDNA FLJ41945 fis, clone PLACE6019676, highly similar	277360000	274540000	278070000	250110000	255730000	272250000	262080000	249300000
sp|Q9Y6C9|MTCH2_HUMAN;tr|E9PIE4|E9PIE4_HUMAN;tr|Q53G34|Q53G34_HUMAN	sp|Q9Y6C9|MTCH2_HUMAN;tr|E9PIE4|E9PIE4_HUMAN;tr|Q53G34|Q53G34_HUMAN	sp|Q9Y6C9|MTCH2_HUMAN Mitochondrial carrier homolog 2 OS=Homo sapiens OX=9606 GN=MTCH2 PE=1 SV=1;tr|E9PIE4|E9PIE4_HUMAN Mitochondrial carrier homolog 2 (Fragment) OS=Homo sapiens OX=9606 GN=MTCH2 PE=1 SV=8;tr|Q53G34|Q53G34_HUMAN Mitochondrial carrier homol	119370000	102220000	89188000	106550000	106110000	105260000	108420000	113300000
sp|Q9Y6G9|DC1L1_HUMAN;tr|B3KM42|B3KM42_HUMAN;tr|E9PHI6|E9PHI6_HUMAN;tr|B4DDM4|B4DDM4_HUMAN;tr|Q6MZE7|Q6MZE7_HUMAN;tr|C9JGM7|C9JGM7_HUMAN;tr|C9JLW1|C9JLW1_HUMAN	sp|Q9Y6G9|DC1L1_HUMAN;tr|B3KM42|B3KM42_HUMAN;tr|E9PHI6|E9PHI6_HUMAN;tr|B4DDM4|B4DDM4_HUMAN;tr|Q6MZE7|Q6MZE7_HUMAN	sp|Q9Y6G9|DC1L1_HUMAN Cytoplasmic dynein 1 light intermediate chain 1 OS=Homo sapiens OX=9606 GN=DYNC1LI1 PE=1 SV=3;tr|B3KM42|B3KM42_HUMAN cDNA FLJ10219 fis, clone HEMBA1007018, highly similar to Cytoplasmic dynein 1 light intermediate chain 1 OS=Homo sapi	87041000	85413000	80034000	81075000	76517000	87821000	86100000	88478000
sp|Q9Y6H1|CHCH2_HUMAN;sp|Q5T1J5|CHCH9_HUMAN	sp|Q9Y6H1|CHCH2_HUMAN;sp|Q5T1J5|CHCH9_HUMAN	sp|Q9Y6H1|CHCH2_HUMAN Coiled-coil-helix-coiled-coil-helix domain-containing protein 2 OS=Homo sapiens OX=9606 GN=CHCHD2 PE=1 SV=1;sp|Q5T1J5|CHCH9_HUMAN Putative coiled-coil-helix-coiled-coil-helix domain-containing protein CHCHD2P9, mitochondrial OS=Homo s	33258000	32579000	30309000	27961000	43380000	36799000	32103000	32155000
tr|A0A023T6R1|A0A023T6R1_HUMAN;sp|Q96A72|MGN2_HUMAN;tr|F5H6N1|F5H6N1_HUMAN;tr|F5H124|F5H124_HUMAN	tr|A0A023T6R1|A0A023T6R1_HUMAN;sp|Q96A72|MGN2_HUMAN;tr|F5H6N1|F5H6N1_HUMAN	tr|A0A023T6R1|A0A023T6R1_HUMAN Mago nashi protein OS=Homo sapiens OX=9606 GN=FLJ10292 PE=2 SV=1;sp|Q96A72|MGN2_HUMAN Protein mago nashi homolog 2 OS=Homo sapiens OX=9606 GN=MAGOHB PE=1 SV=1;tr|F5H6N1|F5H6N1_HUMAN Protein mago nashi homolog 2 OS=Homo sapien	161470000	132590000	140870000	142850000	140480000	150940000	142270000	156860000
tr|A0A023T787|A0A023T787_HUMAN;sp|Q9Y5S9|RBM8A_HUMAN;tr|A0A0J9YW13|A0A0J9YW13_HUMAN	tr|A0A023T787|A0A023T787_HUMAN;sp|Q9Y5S9|RBM8A_HUMAN;tr|A0A0J9YW13|A0A0J9YW13_HUMAN	tr|A0A023T787|A0A023T787_HUMAN RNA-binding protein 8A OS=Homo sapiens OX=9606 GN=RBM8 PE=2 SV=1;sp|Q9Y5S9|RBM8A_HUMAN RNA-binding protein 8A OS=Homo sapiens OX=9606 GN=RBM8A PE=1 SV=1;tr|A0A0J9YW13|A0A0J9YW13_HUMAN RNA-binding protein 8A (Fragment) OS=Homo	145710000	136770000	147290000	155140000	116320000	121520000	125780000	148600000
tr|A0A024QYX3|A0A024QYX3_HUMAN;sp|P98179|RBM3_HUMAN	tr|A0A024QYX3|A0A024QYX3_HUMAN;sp|P98179|RBM3_HUMAN	tr|A0A024QYX3|A0A024QYX3_HUMAN RNA binding motif (RNP1, RRM) protein 3, isoform CRA_c OS=Homo sapiens OX=9606 GN=RBM3 PE=4 SV=1;sp|P98179|RBM3_HUMAN RNA-binding protein 3 OS=Homo sapiens OX=9606 GN=RBM3 PE=1 SV=1	112030000	127590000	109430000	132530000	120940000	108660000	125050000	96988000
tr|A0A024QZ30|A0A024QZ30_HUMAN;sp|P31040|SDHA_HUMAN;tr|D6RFM5|D6RFM5_HUMAN;tr|B3KT34|B3KT34_HUMAN;tr|Q0QF12|Q0QF12_HUMAN;tr|A0A087X1I3|A0A087X1I3_HUMAN;tr|B4DYN5|B4DYN5_HUMAN;tr|B3KYA5|B3KYA5_HUMAN;tr|H0Y8X1|H0Y8X1_HUMAN;tr|B4DNB2|B4DNB2_HUMAN;tr|B7Z6J5|B7Z6J5_HUMAN	tr|A0A024QZ30|A0A024QZ30_HUMAN;sp|P31040|SDHA_HUMAN;tr|D6RFM5|D6RFM5_HUMAN;tr|B3KT34|B3KT34_HUMAN;tr|Q0QF12|Q0QF12_HUMAN;tr|A0A087X1I3|A0A087X1I3_HUMAN;tr|B4DYN5|B4DYN5_HUMAN	tr|A0A024QZ30|A0A024QZ30_HUMAN Succinate dehydrogenase [ubiquinone] flavoprotein subunit, mitochondrial OS=Homo sapiens OX=9606 GN=SDHA PE=3 SV=1;sp|P31040|SDHA_HUMAN Succinate dehydrogenase [ubiquinone] flavoprotein subunit, mitochondrial OS=Homo sapiens	198220000	197310000	201390000	186050000	192110000	189740000	198690000	203720000
tr|A0A024QZ77|A0A024QZ77_HUMAN;sp|Q96C19|EFHD2_HUMAN;tr|H0Y4Y4|H0Y4Y4_HUMAN;tr|Q53SA2|Q53SA2_HUMAN;tr|Q7Z2R5|Q7Z2R5_HUMAN;tr|B4DEE0|B4DEE0_HUMAN;tr|A0A087X1Z2|A0A087X1Z2_HUMAN;tr|A0A024R493|A0A024R493_HUMAN;sp|Q9BUP0|EFHD1_HUMAN;tr|Q59EU6|Q59EU6_HUMAN	tr|A0A024QZ77|A0A024QZ77_HUMAN;sp|Q96C19|EFHD2_HUMAN;tr|H0Y4Y4|H0Y4Y4_HUMAN	tr|A0A024QZ77|A0A024QZ77_HUMAN EF-hand domain family, member D2, isoform CRA_a OS=Homo sapiens OX=9606 GN=EFHD2 PE=2 SV=1;sp|Q96C19|EFHD2_HUMAN EF-hand domain-containing protein D2 OS=Homo sapiens OX=9606 GN=EFHD2 PE=1 SV=1;tr|H0Y4Y4|H0Y4Y4_HUMAN EF-hand d	75126000	85887000	86002000	86351000	82339000	80842000	83725000	88074000
tr|A0A024QZA8|A0A024QZA8_HUMAN;sp|P29317|EPHA2_HUMAN;tr|B4DL04|B4DL04_HUMAN;tr|Q96HF4|Q96HF4_HUMAN	tr|A0A024QZA8|A0A024QZA8_HUMAN;sp|P29317|EPHA2_HUMAN;tr|B4DL04|B4DL04_HUMAN	tr|A0A024QZA8|A0A024QZA8_HUMAN EPH receptor A2, isoform CRA_a OS=Homo sapiens OX=9606 GN=EPHA2 PE=3 SV=1;sp|P29317|EPHA2_HUMAN Ephrin type-A receptor 2 OS=Homo sapiens OX=9606 GN=EPHA2 PE=1 SV=2;tr|B4DL04|B4DL04_HUMAN cDNA FLJ51229, highly similar to Ephri	150360000	141830000	160360000	141660000	124670000	131250000	127000000	134140000
tr|A0A024QZD1|A0A024QZD1_HUMAN;sp|Q07020|RL18_HUMAN;tr|J3QQ67|J3QQ67_HUMAN;tr|F8VYV2|F8VYV2_HUMAN;tr|G3V203|G3V203_HUMAN;tr|Q0QEW2|Q0QEW2_HUMAN;tr|H0YHA7|H0YHA7_HUMAN;tr|B4DDY5|B4DDY5_HUMAN;tr|A0A075B7A0|A0A075B7A0_HUMAN;tr|F8VUA6|F8VUA6_HUMAN;tr|F8VXR6|F8VXR6_HUMAN	tr|A0A024QZD1|A0A024QZD1_HUMAN;sp|Q07020|RL18_HUMAN;tr|J3QQ67|J3QQ67_HUMAN;tr|F8VYV2|F8VYV2_HUMAN;tr|G3V203|G3V203_HUMAN;tr|Q0QEW2|Q0QEW2_HUMAN;tr|H0YHA7|H0YHA7_HUMAN;tr|B4DDY5|B4DDY5_HUMAN;tr|A0A075B7A0|A0A075B7A0_HUMAN;tr|F8VUA6|F8VUA6_HUMAN	tr|A0A024QZD1|A0A024QZD1_HUMAN Ribosomal protein L18, isoform CRA_c OS=Homo sapiens OX=9606 GN=RPL18 PE=4 SV=1;sp|Q07020|RL18_HUMAN 60S ribosomal protein L18 OS=Homo sapiens OX=9606 GN=RPL18 PE=1 SV=2;tr|J3QQ67|J3QQ67_HUMAN 60S ribosomal protein L18 (Fragm	103850000	143600000	225410000	217220000	101700000	143490000	174740000	99125000
tr|A0A024QZF1|A0A024QZF1_HUMAN;sp|P37198|NUP62_HUMAN;tr|M0QXN5|M0QXN5_HUMAN	tr|A0A024QZF1|A0A024QZF1_HUMAN;sp|P37198|NUP62_HUMAN;tr|M0QXN5|M0QXN5_HUMAN	tr|A0A024QZF1|A0A024QZF1_HUMAN HCG19665, isoform CRA_a OS=Homo sapiens OX=9606 GN=hCG_19665 PE=4 SV=1;sp|P37198|NUP62_HUMAN Nuclear pore glycoprotein p62 OS=Homo sapiens OX=9606 GN=NUP62 PE=1 SV=3;tr|M0QXN5|M0QXN5_HUMAN Nuclear pore glycoprotein p62 OS=Hom	44463000	51768000	52615000	47995000	42861000	42152000	56941000	50370000
tr|A0A024QZK8|A0A024QZK8_HUMAN;sp|P31942|HNRH3_HUMAN;tr|Q53F48|Q53F48_HUMAN;tr|A0A024QZP1|A0A024QZP1_HUMAN;tr|B4DHY1|B4DHY1_HUMAN	tr|A0A024QZK8|A0A024QZK8_HUMAN;sp|P31942|HNRH3_HUMAN;tr|Q53F48|Q53F48_HUMAN;tr|A0A024QZP1|A0A024QZP1_HUMAN;tr|B4DHY1|B4DHY1_HUMAN	tr|A0A024QZK8|A0A024QZK8_HUMAN Heterogeneous nuclear ribonucleoprotein H3 (2H9), isoform CRA_a OS=Homo sapiens OX=9606 GN=HNRPH3 PE=4 SV=1;sp|P31942|HNRH3_HUMAN Heterogeneous nuclear ribonucleoprotein H3 OS=Homo sapiens OX=9606 GN=HNRNPH3 PE=1 SV=2;tr|Q53F	220610000	215100000	195140000	202570000	217550000	221040000	198930000	232030000
tr|A0A024QZN2|A0A024QZN2_HUMAN;sp|Q8WXX5|DNJC9_HUMAN;tr|Q2VIL4|Q2VIL4_HUMAN	tr|A0A024QZN2|A0A024QZN2_HUMAN;sp|Q8WXX5|DNJC9_HUMAN;tr|Q2VIL4|Q2VIL4_HUMAN	tr|A0A024QZN2|A0A024QZN2_HUMAN HCG2024613, isoform CRA_a OS=Homo sapiens OX=9606 GN=hCG_2024613 PE=4 SV=1;sp|Q8WXX5|DNJC9_HUMAN DnaJ homolog subfamily C member 9 OS=Homo sapiens OX=9606 GN=DNAJC9 PE=1 SV=1;tr|Q2VIL4|Q2VIL4_HUMAN RcDNAJ9 (Fragment) OS=Homo	71593000	67005000	58686000	63802000	90727000	86763000	81374000	82694000
tr|A0A024QZN4|A0A024QZN4_HUMAN;tr|V9HWK2|V9HWK2_HUMAN;sp|P18206|VINC_HUMAN;tr|B3KXA2|B3KXA2_HUMAN;tr|B4E3Q9|B4E3Q9_HUMAN;tr|B4DKC9|B4DKC9_HUMAN;tr|B4DTM7|B4DTM7_HUMAN;tr|A0A096LPE1|A0A096LPE1_HUMAN	tr|A0A024QZN4|A0A024QZN4_HUMAN;tr|V9HWK2|V9HWK2_HUMAN;sp|P18206|VINC_HUMAN;tr|B3KXA2|B3KXA2_HUMAN;tr|B4E3Q9|B4E3Q9_HUMAN	tr|A0A024QZN4|A0A024QZN4_HUMAN Vinculin, isoform CRA_c OS=Homo sapiens OX=9606 GN=VCL PE=4 SV=1;tr|V9HWK2|V9HWK2_HUMAN Epididymis luminal protein 114 OS=Homo sapiens OX=9606 GN=HEL114 PE=2 SV=1;sp|P18206|VINC_HUMAN Vinculin OS=Homo sapiens OX=9606 GN=VCL P	1373700000	1334200000	1346000000	1465900000	1119800000	1128000000	1113600000	1131300000
tr|A0A024QZN8|A0A024QZN8_HUMAN;sp|Q5GLZ8|HERC4_HUMAN;tr|A8K9U4|A8K9U4_HUMAN;tr|H0Y6K7|H0Y6K7_HUMAN;tr|D6RCL5|D6RCL5_HUMAN;tr|Q9Y4U2|Q9Y4U2_HUMAN	tr|A0A024QZN8|A0A024QZN8_HUMAN;sp|Q5GLZ8|HERC4_HUMAN;tr|A8K9U4|A8K9U4_HUMAN	tr|A0A024QZN8|A0A024QZN8_HUMAN Hect domain and RLD 4, isoform CRA_b OS=Homo sapiens OX=9606 GN=HERC4 PE=4 SV=1;sp|Q5GLZ8|HERC4_HUMAN Probable E3 ubiquitin-protein ligase HERC4 OS=Homo sapiens OX=9606 GN=HERC4 PE=1 SV=1;tr|A8K9U4|A8K9U4_HUMAN cDNA FLJ77205,	20830000	28472000	24520000	26438000	31598000	34976000	34295000	31916000
tr|A0A024QZP7|A0A024QZP7_HUMAN;sp|P06493|CDK1_HUMAN;tr|Q5H9N4|Q5H9N4_HUMAN;tr|A0A024QZJ8|A0A024QZJ8_HUMAN;tr|A0A087WZZ9|A0A087WZZ9_HUMAN;tr|I6L9I5|I6L9I5_HUMAN;tr|E5RIU6|E5RIU6_HUMAN;tr|B7Z3D6|B7Z3D6_HUMAN;tr|K7ELV5|K7ELV5_HUMAN;sp|Q00526|CDK3_HUMAN;tr|A0A024R8R3|A0A024R8R3_HUMAN;tr|G3V317|G3V317_HUMAN	tr|A0A024QZP7|A0A024QZP7_HUMAN;sp|P06493|CDK1_HUMAN;tr|Q5H9N4|Q5H9N4_HUMAN;tr|A0A024QZJ8|A0A024QZJ8_HUMAN;tr|A0A087WZZ9|A0A087WZZ9_HUMAN;tr|I6L9I5|I6L9I5_HUMAN;tr|E5RIU6|E5RIU6_HUMAN	tr|A0A024QZP7|A0A024QZP7_HUMAN Cell division cycle 2, G1 to S and G2 to M, isoform CRA_a OS=Homo sapiens OX=9606 GN=CDK1 PE=1 SV=1;sp|P06493|CDK1_HUMAN Cyclin-dependent kinase 1 OS=Homo sapiens OX=9606 GN=CDK1 PE=1 SV=3;tr|Q5H9N4|Q5H9N4_HUMAN Uncharacteriz	305180000	285610000	285370000	296640000	313790000	320080000	307170000	325280000
tr|A0A024QZT0|A0A024QZT0_HUMAN;sp|P45880|VDAC2_HUMAN;tr|A0A024QZN9|A0A024QZN9_HUMAN;tr|A0A0A0MR02|A0A0A0MR02_HUMAN;tr|B4DKM5|B4DKM5_HUMAN;tr|Q5JSD2|Q5JSD2_HUMAN;tr|Q5JSD1|Q5JSD1_HUMAN;tr|A2A3S1|A2A3S1_HUMAN	tr|A0A024QZT0|A0A024QZT0_HUMAN;sp|P45880|VDAC2_HUMAN;tr|A0A024QZN9|A0A024QZN9_HUMAN;tr|A0A0A0MR02|A0A0A0MR02_HUMAN;tr|B4DKM5|B4DKM5_HUMAN;tr|Q5JSD2|Q5JSD2_HUMAN;tr|Q5JSD1|Q5JSD1_HUMAN	tr|A0A024QZT0|A0A024QZT0_HUMAN Voltage-dependent anion channel 2, isoform CRA_c OS=Homo sapiens OX=9606 GN=VDAC2 PE=4 SV=1;sp|P45880|VDAC2_HUMAN Voltage-dependent anion-selective channel protein 2 OS=Homo sapiens OX=9606 GN=VDAC2 PE=1 SV=2;tr|A0A024QZN9|A0	924920000	850790000	818300000	827550000	737380000	783430000	811430000	786400000
tr|A0A024QZT4|A0A024QZT4_HUMAN;sp|P50453|SPB9_HUMAN;tr|Q6N0A8|Q6N0A8_HUMAN	tr|A0A024QZT4|A0A024QZT4_HUMAN;sp|P50453|SPB9_HUMAN;tr|Q6N0A8|Q6N0A8_HUMAN	tr|A0A024QZT4|A0A024QZT4_HUMAN Serpin peptidase inhibitor, clade B (Ovalbumin), member 9, isoform CRA_a OS=Homo sapiens OX=9606 GN=SERPINB9 PE=2 SV=1;sp|P50453|SPB9_HUMAN Serpin B9 OS=Homo sapiens OX=9606 GN=SERPINB9 PE=1 SV=1;tr|Q6N0A8|Q6N0A8_HUMAN Unchar	97935000	98843000	91482000	89620000	89660000	81927000	70538000	72883000
tr|A0A024QZT7|A0A024QZT7_HUMAN;sp|P33947|ERD22_HUMAN;tr|H7BYF7|H7BYF7_HUMAN	tr|A0A024QZT7|A0A024QZT7_HUMAN;sp|P33947|ERD22_HUMAN;tr|H7BYF7|H7BYF7_HUMAN	tr|A0A024QZT7|A0A024QZT7_HUMAN ER lumen protein-retaining receptor OS=Homo sapiens OX=9606 GN=KDELR2 PE=3 SV=1;sp|P33947|ERD22_HUMAN ER lumen protein-retaining receptor 2 OS=Homo sapiens OX=9606 GN=KDELR2 PE=1 SV=1;tr|H7BYF7|H7BYF7_HUMAN ER lumen protein-r	37930000	48911000	43713000	42408000	30932000	33031000	37005000	42300000
tr|A0A024QZX3|A0A024QZX3_HUMAN;sp|P35237|SPB6_HUMAN;tr|A0A024QZX5|A0A024QZX5_HUMAN;tr|A0A087X1N8|A0A087X1N8_HUMAN;tr|Q8IXH2|Q8IXH2_HUMAN;tr|A0A024QZT8|A0A024QZT8_HUMAN;tr|C9JTJ8|C9JTJ8_HUMAN;tr|C9JVA8|C9JVA8_HUMAN;tr|H7BXK7|H7BXK7_HUMAN;tr|A0A1B0GU38|A0A1B0GU38_HUMAN	tr|A0A024QZX3|A0A024QZX3_HUMAN;sp|P35237|SPB6_HUMAN;tr|A0A024QZX5|A0A024QZX5_HUMAN;tr|A0A087X1N8|A0A087X1N8_HUMAN;tr|Q8IXH2|Q8IXH2_HUMAN	tr|A0A024QZX3|A0A024QZX3_HUMAN Serpin peptidase inhibitor, clade B (Ovalbumin), member 6, isoform CRA_a OS=Homo sapiens OX=9606 GN=SERPINB6 PE=3 SV=1;sp|P35237|SPB6_HUMAN Serpin B6 OS=Homo sapiens OX=9606 GN=SERPINB6 PE=1 SV=3;tr|A0A024QZX5|A0A024QZX5_HUMA	51499000	60511000	53475000	50811000	55792000	57273000	49860000	50349000
tr|A0A024QZY5|A0A024QZY5_HUMAN;sp|Q13523|PRP4B_HUMAN;tr|B4DZQ5|B4DZQ5_HUMAN;tr|H0YDJ3|H0YDJ3_HUMAN;tr|D3DWH5|D3DWH5_HUMAN	tr|A0A024QZY5|A0A024QZY5_HUMAN;sp|Q13523|PRP4B_HUMAN;tr|B4DZQ5|B4DZQ5_HUMAN;tr|H0YDJ3|H0YDJ3_HUMAN	tr|A0A024QZY5|A0A024QZY5_HUMAN PRP4 pre-mRNA processing factor 4 homolog B (Yeast), isoform CRA_a OS=Homo sapiens OX=9606 GN=PRPF4B PE=4 SV=1;sp|Q13523|PRP4B_HUMAN Serine/threonine-protein kinase PRP4 homolog OS=Homo sapiens OX=9606 GN=PRPF4B PE=1 SV=3;tr|	19482000	20987000	20263000	15162000	20228000	13509000	19930000	15699000
tr|A0A024R071|A0A024R071_HUMAN;sp|O75694|NU155_HUMAN;tr|E9PF10|E9PF10_HUMAN;tr|B4DLT2|B4DLT2_HUMAN;tr|B3KMK3|B3KMK3_HUMAN;tr|D6RA13|D6RA13_HUMAN	tr|A0A024R071|A0A024R071_HUMAN;sp|O75694|NU155_HUMAN;tr|E9PF10|E9PF10_HUMAN;tr|B4DLT2|B4DLT2_HUMAN	tr|A0A024R071|A0A024R071_HUMAN Nucleoporin 155kDa, isoform CRA_a OS=Homo sapiens OX=9606 GN=NUP155 PE=4 SV=1;sp|O75694|NU155_HUMAN Nuclear pore complex protein Nup155 OS=Homo sapiens OX=9606 GN=NUP155 PE=1 SV=1;tr|E9PF10|E9PF10_HUMAN Nuclear pore complex p	96275000	87628000	90712000	100390000	102170000	97828000	95730000	99668000
tr|A0A024R0E5|A0A024R0E5_HUMAN;sp|P52907|CAZA1_HUMAN;tr|A8K0T9|A8K0T9_HUMAN	tr|A0A024R0E5|A0A024R0E5_HUMAN;sp|P52907|CAZA1_HUMAN;tr|A8K0T9|A8K0T9_HUMAN	tr|A0A024R0E5|A0A024R0E5_HUMAN Capping protein (Actin filament) muscle Z-line, alpha 1, isoform CRA_a OS=Homo sapiens OX=9606 GN=CAPZA1 PE=3 SV=1;sp|P52907|CAZA1_HUMAN F-actin-capping protein subunit alpha-1 OS=Homo sapiens OX=9606 GN=CAPZA1 PE=1 SV=3;tr|A	547750000	531260000	551220000	533050000	586100000	566070000	525070000	590610000
tr|A0A024R0H7|A0A024R0H7_HUMAN;sp|Q9BQA1|MEP50_HUMAN;tr|H0Y711|H0Y711_HUMAN;tr|B4DJP0|B4DJP0_HUMAN	tr|A0A024R0H7|A0A024R0H7_HUMAN;sp|Q9BQA1|MEP50_HUMAN;tr|H0Y711|H0Y711_HUMAN	tr|A0A024R0H7|A0A024R0H7_HUMAN Testis tissue sperm-binding protein Li 44a OS=Homo sapiens OX=9606 GN=WDR77 PE=2 SV=1;sp|Q9BQA1|MEP50_HUMAN Methylosome protein 50 OS=Homo sapiens OX=9606 GN=WDR77 PE=1 SV=1;tr|H0Y711|H0Y711_HUMAN Methylosome protein 50 (Frag	61172000	58895000	58801000	59267000	64071000	62124000	63136000	70570000
tr|A0A024R0L6|A0A024R0L6_HUMAN;sp|Q15102|PA1B3_HUMAN;tr|M0R389|M0R389_HUMAN;tr|M0QXS6|M0QXS6_HUMAN;tr|M0R323|M0R323_HUMAN;tr|M0QZT2|M0QZT2_HUMAN;tr|M0R1K3|M0R1K3_HUMAN	tr|A0A024R0L6|A0A024R0L6_HUMAN;sp|Q15102|PA1B3_HUMAN;tr|M0R389|M0R389_HUMAN;tr|M0QXS6|M0QXS6_HUMAN;tr|M0R323|M0R323_HUMAN;tr|M0QZT2|M0QZT2_HUMAN;tr|M0R1K3|M0R1K3_HUMAN	tr|A0A024R0L6|A0A024R0L6_HUMAN Platelet-activating factor acetylhydrolase, isoform Ib, gamma subunit 29kDa, isoform CRA_a OS=Homo sapiens OX=9606 GN=PAFAH1B3 PE=4 SV=1;sp|Q15102|PA1B3_HUMAN Platelet-activating factor acetylhydrolase IB subunit gamma OS=Hom	123380000	122840000	107410000	117610000	120430000	108260000	109930000	108150000
tr|A0A024R0R1|A0A024R0R1_HUMAN;sp|Q92888|ARHG1_HUMAN;tr|M0QZR4|M0QZR4_HUMAN;tr|Q49AN3|Q49AN3_HUMAN;tr|M0QYC1|M0QYC1_HUMAN;tr|M0QYS3|M0QYS3_HUMAN;tr|Q8NF33|Q8NF33_HUMAN;tr|M0QZH8|M0QZH8_HUMAN;tr|M0R2C7|M0R2C7_HUMAN	tr|A0A024R0R1|A0A024R0R1_HUMAN;sp|Q92888|ARHG1_HUMAN;tr|M0QZR4|M0QZR4_HUMAN;tr|Q49AN3|Q49AN3_HUMAN;tr|M0QYC1|M0QYC1_HUMAN	tr|A0A024R0R1|A0A024R0R1_HUMAN Rho guanine nucleotide exchange factor (GEF) 1, isoform CRA_e OS=Homo sapiens OX=9606 GN=ARHGEF1 PE=4 SV=1;sp|Q92888|ARHG1_HUMAN Rho guanine nucleotide exchange factor 1 OS=Homo sapiens OX=9606 GN=ARHGEF1 PE=1 SV=2;tr|M0QZR4|	72776000	72633000	78049000	87411000	69998000	66815000	72667000	86866000
tr|A0A024R0R4|A0A024R0R4_HUMAN;sp|Q9UBE0|SAE1_HUMAN;tr|B3KNJ4|B3KNJ4_HUMAN;tr|M0QX65|M0QX65_HUMAN;tr|M0QZS6|M0QZS6_HUMAN;tr|M0QYM8|M0QYM8_HUMAN;tr|M0R054|M0R054_HUMAN;tr|B4DY66|B4DY66_HUMAN;tr|M0QYP2|M0QYP2_HUMAN;tr|M0R286|M0R286_HUMAN;tr|M0R375|M0R375_HUMAN	tr|A0A024R0R4|A0A024R0R4_HUMAN;sp|Q9UBE0|SAE1_HUMAN;tr|B3KNJ4|B3KNJ4_HUMAN;tr|M0QX65|M0QX65_HUMAN;tr|M0QZS6|M0QZS6_HUMAN	tr|A0A024R0R4|A0A024R0R4_HUMAN SUMO-1 activating enzyme subunit 1, isoform CRA_b OS=Homo sapiens OX=9606 GN=SAE1 PE=4 SV=1;sp|Q9UBE0|SAE1_HUMAN SUMO-activating enzyme subunit 1 OS=Homo sapiens OX=9606 GN=SAE1 PE=1 SV=1;tr|B3KNJ4|B3KNJ4_HUMAN SUMO-1 activat	79292000	71368000	67332000	77423000	84171000	83960000	78788000	83648000
tr|A0A024R0R9|A0A024R0R9_HUMAN;sp|P54920|SNAA_HUMAN;tr|M0R0Y2|M0R0Y2_HUMAN;tr|M0R2M1|M0R2M1_HUMAN;tr|M0R213|M0R213_HUMAN;tr|A0A024R0V6|A0A024R0V6_HUMAN;tr|M0R0I4|M0R0I4_HUMAN;tr|M0R027|M0R027_HUMAN;tr|M0R058|M0R058_HUMAN;tr|B4DGP9|B4DGP9_HUMAN;sp|Q9H115|SNAB_HUMAN;tr|B4DIV0|B4DIV0_HUMAN;tr|A0A087WZQ7|A0A087WZQ7_HUMAN;tr|M0QZM9|M0QZM9_HUMAN;tr|M0QZN5|M0QZN5_HUMAN;tr|M0R031|M0R031_HUMAN	tr|A0A024R0R9|A0A024R0R9_HUMAN;sp|P54920|SNAA_HUMAN;tr|M0R0Y2|M0R0Y2_HUMAN;tr|M0R2M1|M0R2M1_HUMAN;tr|M0R213|M0R213_HUMAN	tr|A0A024R0R9|A0A024R0R9_HUMAN N-ethylmaleimide-sensitive factor attachment protein, alpha, isoform CRA_c OS=Homo sapiens OX=9606 GN=NAPA PE=4 SV=1;sp|P54920|SNAA_HUMAN Alpha-soluble NSF attachment protein OS=Homo sapiens OX=9606 GN=NAPA PE=1 SV=3;tr|M0R0Y	79685000	90055000	93060000	90612000	101180000	102320000	90143000	93463000
tr|A0A024R0S6|A0A024R0S6_HUMAN;sp|Q9NZN4|EHD2_HUMAN;tr|B4DLA1|B4DLA1_HUMAN;tr|Q8NCJ3|Q8NCJ3_HUMAN;tr|B3KUH4|B3KUH4_HUMAN;tr|B7ZAY3|B7ZAY3_HUMAN;tr|B4DU62|B4DU62_HUMAN;tr|B4DE23|B4DE23_HUMAN	tr|A0A024R0S6|A0A024R0S6_HUMAN;sp|Q9NZN4|EHD2_HUMAN;tr|B4DLA1|B4DLA1_HUMAN;tr|Q8NCJ3|Q8NCJ3_HUMAN;tr|B3KUH4|B3KUH4_HUMAN	tr|A0A024R0S6|A0A024R0S6_HUMAN EH-domain containing 2, isoform CRA_a OS=Homo sapiens OX=9606 GN=EHD2 PE=3 SV=1;sp|Q9NZN4|EHD2_HUMAN EH domain-containing protein 2 OS=Homo sapiens OX=9606 GN=EHD2 PE=1 SV=2;tr|B4DLA1|B4DLA1_HUMAN cDNA FLJ53453, highly simila	129290000	121040000	126960000	135230000	110230000	108090000	103400000	110750000
tr|A0A024R0Y2|A0A024R0Y2_HUMAN;tr|B2ZZ90|B2ZZ90_HUMAN;sp|Q13085|ACACA_HUMAN;tr|A2NX49|A2NX49_HUMAN;tr|Q59FY4|Q59FY4_HUMAN;tr|Q7Z5W8|Q7Z5W8_HUMAN;tr|B4DIG6|B4DIG6_HUMAN;tr|B4DIW1|B4DIW1_HUMAN;tr|B4DWK9|B4DWK9_HUMAN;tr|B4DK31|B4DK31_HUMAN;tr|B4DIR2|B4DIR2_HUMAN;sp|O00763|ACACB_HUMAN;tr|A0A087WWN5|A0A087WWN5_HUMAN;tr|A0A087WYS8|A0A087WYS8_HUMAN;tr|B4DYJ7|B4DYJ7_HUMAN;tr|Q4G170|Q4G170_HUMAN;tr|F8W8T8…	tr|A0A024R0Y2|A0A024R0Y2_HUMAN;tr|B2ZZ90|B2ZZ90_HUMAN;sp|Q13085|ACACA_HUMAN;tr|A2NX49|A2NX49_HUMAN	tr|A0A024R0Y2|A0A024R0Y2_HUMAN HCG30204, isoform CRA_a OS=Homo sapiens OX=9606 GN=hCG_30204 PE=4 SV=1;tr|B2ZZ90|B2ZZ90_HUMAN Acetyl-Coenzyme A carboxylase alpha OS=Homo sapiens OX=9606 GN=ACACA PE=2 SV=1;sp|Q13085|ACACA_HUMAN Acetyl-CoA carboxylase 1 OS=Ho	42691000	35939000	37156000	35266000	41221000	38578000	32423000	35845000
tr|A0A024R179|A0A024R179_HUMAN;sp|Q09161|NCBP1_HUMAN;tr|X6R941|X6R941_HUMAN;tr|F2Z2T1|F2Z2T1_HUMAN	tr|A0A024R179|A0A024R179_HUMAN;sp|Q09161|NCBP1_HUMAN	tr|A0A024R179|A0A024R179_HUMAN Nuclear cap binding protein subunit 1, 80kDa, isoform CRA_a OS=Homo sapiens OX=9606 GN=NCBP1 PE=4 SV=1;sp|Q09161|NCBP1_HUMAN Nuclear cap-binding protein subunit 1 OS=Homo sapiens OX=9606 GN=NCBP1 PE=1 SV=1	47378000	52221000	50596000	60437000	67116000	64334000	64064000	60718000
tr|A0A024R1A3|A0A024R1A3_HUMAN;sp|P22314|UBA1_HUMAN;tr|B4DDE4|B4DDE4_HUMAN;tr|B4DL67|B4DL67_HUMAN;tr|Q5JRR6|Q5JRR6_HUMAN;tr|B3KUJ2|B3KUJ2_HUMAN;tr|Q5JRR9|Q5JRR9_HUMAN;tr|Q5JRS0|Q5JRS0_HUMAN;tr|Q5JRS2|Q5JRS2_HUMAN;tr|Q5JRS1|Q5JRS1_HUMAN;tr|Q5JRS3|Q5JRS3_HUMAN;tr|Q8WY81|Q8WY81_HUMAN;tr|Q712V1|Q712V1_HUMAN	tr|A0A024R1A3|A0A024R1A3_HUMAN;sp|P22314|UBA1_HUMAN;tr|B4DDE4|B4DDE4_HUMAN;tr|B4DL67|B4DL67_HUMAN	tr|A0A024R1A3|A0A024R1A3_HUMAN Testicular secretory protein Li 63 OS=Homo sapiens OX=9606 GN=UBE1 PE=2 SV=1;sp|P22314|UBA1_HUMAN Ubiquitin-like modifier-activating enzyme 1 OS=Homo sapiens OX=9606 GN=UBA1 PE=1 SV=3;tr|B4DDE4|B4DDE4_HUMAN cDNA FLJ54582, hig	1425600000	1351000000	1336700000	1312800000	1158500000	1163600000	1139900000	1161400000
tr|A0A024R1K7|A0A024R1K7_HUMAN;sp|Q04917|1433F_HUMAN;tr|Q9H4N8|Q9H4N8_HUMAN;tr|B2R6N6|B2R6N6_HUMAN;tr|A2IDB2|A2IDB2_HUMAN;tr|F8WEB6|F8WEB6_HUMAN;tr|A2IDB1|A2IDB1_HUMAN	tr|A0A024R1K7|A0A024R1K7_HUMAN;sp|Q04917|1433F_HUMAN;tr|Q9H4N8|Q9H4N8_HUMAN;tr|B2R6N6|B2R6N6_HUMAN;tr|A2IDB2|A2IDB2_HUMAN	tr|A0A024R1K7|A0A024R1K7_HUMAN Tyrosine 3-monooxygenase/tryptophan 5-monooxygenase activation protein, eta polypeptide, isoform CRA_b OS=Homo sapiens OX=9606 GN=YWHAH PE=3 SV=1;sp|Q04917|1433F_HUMAN 14-3-3 protein eta OS=Homo sapiens OX=9606 GN=YWHAH PE=1	241230000	233120000	236660000	227190000	240510000	231430000	223160000	242730000
tr|A0A024R1K8|A0A024R1K8_HUMAN;sp|Q15459|SF3A1_HUMAN;tr|B4E091|B4E091_HUMAN;tr|H7C1L2|H7C1L2_HUMAN;tr|F8WB66|F8WB66_HUMAN;tr|F8WC79|F8WC79_HUMAN	tr|A0A024R1K8|A0A024R1K8_HUMAN;sp|Q15459|SF3A1_HUMAN;tr|B4E091|B4E091_HUMAN	tr|A0A024R1K8|A0A024R1K8_HUMAN Splicing factor 3a, subunit 1, 120kDa, isoform CRA_a OS=Homo sapiens OX=9606 GN=SF3A1 PE=4 SV=1;sp|Q15459|SF3A1_HUMAN Splicing factor 3A subunit 1 OS=Homo sapiens OX=9606 GN=SF3A1 PE=1 SV=1;tr|B4E091|B4E091_HUMAN cDNA FLJ5543	191690000	179880000	181960000	196930000	174810000	184160000	184160000	194810000
tr|A0A024R1N1|A0A024R1N1_HUMAN;sp|P35579|MYH9_HUMAN;tr|A0A0U4BW16|A0A0U4BW16_HUMAN;tr|Q86XU5|Q86XU5_HUMAN;tr|B4E3S1|B4E3S1_HUMAN;tr|Q6ZNL4|Q6ZNL4_HUMAN;tr|Q5BKV1|Q5BKV1_HUMAN;tr|Q99529|Q99529_HUMAN;tr|B1AH99|B1AH99_HUMAN;tr|Q7Z7R0|Q7Z7R0_HUMAN;tr|A0A0C4DFM8|A0A0C4DFM8_HUMAN;tr|O14729|O14729_HUMAN;tr|O14794|O14794_HUMAN;tr|Q2PS10|Q2PS10_HUMAN;tr|Q68D89|Q68D89_HUMAN;tr|B4E177|B4E177_HUMAN;tr|A1L2Z2…	tr|A0A024R1N1|A0A024R1N1_HUMAN;sp|P35579|MYH9_HUMAN;tr|A0A0U4BW16|A0A0U4BW16_HUMAN;tr|Q86XU5|Q86XU5_HUMAN	tr|A0A024R1N1|A0A024R1N1_HUMAN Myosin, heavy polypeptide 9, non-muscle, isoform CRA_a OS=Homo sapiens OX=9606 GN=MYH9 PE=3 SV=1;sp|P35579|MYH9_HUMAN Myosin-9 OS=Homo sapiens OX=9606 GN=MYH9 PE=1 SV=4;tr|A0A0U4BW16|A0A0U4BW16_HUMAN Non-muscle myosin heavy c	10903000000	10576000000	10307000000	11045000000	8941400000	8703200000	8746700000	9014900000
tr|A0A024R1N4|A0A024R1N4_HUMAN;sp|P12956|XRCC6_HUMAN;tr|B1AHC9|B1AHC9_HUMAN;tr|B2RDN9|B2RDN9_HUMAN;tr|B4DE32|B4DE32_HUMAN;tr|B4E356|B4E356_HUMAN;tr|Q6IC76|Q6IC76_HUMAN	tr|A0A024R1N4|A0A024R1N4_HUMAN;sp|P12956|XRCC6_HUMAN;tr|B1AHC9|B1AHC9_HUMAN;tr|B2RDN9|B2RDN9_HUMAN;tr|B4DE32|B4DE32_HUMAN;tr|B4E356|B4E356_HUMAN	tr|A0A024R1N4|A0A024R1N4_HUMAN X-ray repair complementing defective repair in Chinese hamster cells 6 (Ku autoantigen, 70kDa), isoform CRA_a OS=Homo sapiens OX=9606 GN=XRCC6 PE=4 SV=1;sp|P12956|XRCC6_HUMAN X-ray repair cross-complementing protein 6 OS=Homo	659900000	720940000	802600000	899280000	511540000	588820000	822190000	747070000
tr|A0A024R1P2|A0A024R1P2_HUMAN;sp|P15153|RAC2_HUMAN;tr|B1AH77|B1AH77_HUMAN;tr|B1AH80|B1AH80_HUMAN;tr|B1AH78|B1AH78_HUMAN;tr|J3KSC4|J3KSC4_HUMAN;tr|J3QLK0|J3QLK0_HUMAN;tr|Q59FQ0|Q59FQ0_HUMAN	tr|A0A024R1P2|A0A024R1P2_HUMAN;sp|P15153|RAC2_HUMAN;tr|B1AH77|B1AH77_HUMAN;tr|B1AH80|B1AH80_HUMAN;tr|B1AH78|B1AH78_HUMAN	tr|A0A024R1P2|A0A024R1P2_HUMAN Ras-related C3 botulinum toxin substrate 2 (Rho family, small GTP binding protein Rac2), isoform CRA_a OS=Homo sapiens OX=9606 GN=RAC2 PE=4 SV=1;sp|P15153|RAC2_HUMAN Ras-related C3 botulinum toxin substrate 2 OS=Homo sapiens	390860000	378940000	373110000	389230000	363920000	354240000	355560000	382020000
tr|A0A024R1S8|A0A024R1S8_HUMAN;sp|Q14847|LASP1_HUMAN;tr|C9J9W2|C9J9W2_HUMAN;tr|A8K1D2|A8K1D2_HUMAN;tr|B4DIC4|B4DIC4_HUMAN;tr|B4DJI4|B4DJI4_HUMAN;tr|Q9NPR7|Q9NPR7_HUMAN;tr|F6S2S5|F6S2S5_HUMAN;tr|K7ESD6|K7ESD6_HUMAN;tr|J3KSN1|J3KSN1_HUMAN	tr|A0A024R1S8|A0A024R1S8_HUMAN;sp|Q14847|LASP1_HUMAN;tr|C9J9W2|C9J9W2_HUMAN;tr|A8K1D2|A8K1D2_HUMAN;tr|B4DIC4|B4DIC4_HUMAN;tr|B4DJI4|B4DJI4_HUMAN	tr|A0A024R1S8|A0A024R1S8_HUMAN LIM and SH3 protein 1, isoform CRA_b OS=Homo sapiens OX=9606 GN=LASP1 PE=4 SV=1;sp|Q14847|LASP1_HUMAN LIM and SH3 domain protein 1 OS=Homo sapiens OX=9606 GN=LASP1 PE=1 SV=2;tr|C9J9W2|C9J9W2_HUMAN LIM and SH3 domain protein 1	955830000	883210000	897020000	1031700000	848790000	788350000	743370000	819750000
tr|A0A024R1T5|A0A024R1T5_HUMAN;sp|P09543|CN37_HUMAN;tr|B4DFN6|B4DFN6_HUMAN;tr|B4DI06|B4DI06_HUMAN;tr|K7EN66|K7EN66_HUMAN;tr|C9K0L8|C9K0L8_HUMAN;tr|K7ERZ0|K7ERZ0_HUMAN;tr|K7ERC4|K7ERC4_HUMAN	tr|A0A024R1T5|A0A024R1T5_HUMAN;sp|P09543|CN37_HUMAN;tr|B4DFN6|B4DFN6_HUMAN;tr|B4DI06|B4DI06_HUMAN	tr|A0A024R1T5|A0A024R1T5_HUMAN 2,3-cyclic-nucleotide 3-phosphodiesterase OS=Homo sapiens OX=9606 GN=CNP PE=3 SV=1;sp|P09543|CN37_HUMAN 2,3-cyclic-nucleotide 3-phosphodiesterase OS=Homo sapiens OX=9606 GN=CNP PE=1 SV=2;tr|B4DFN6|B4DFN6_HUMAN cDNA FLJ5	50748000	44627000	44407000	39151000	61056000	35907000	46191000	47617000
tr|A0A024R1U0|A0A024R1U0_HUMAN;sp|P46060|RAGP1_HUMAN;tr|B4DY16|B4DY16_HUMAN;tr|B4E0U0|B4E0U0_HUMAN;tr|Q9BSK3|Q9BSK3_HUMAN;tr|H0Y4Q3|H0Y4Q3_HUMAN;tr|B0QYT5|B0QYT5_HUMAN;tr|B0QYT4|B0QYT4_HUMAN;tr|B0QYT6|B0QYT6_HUMAN;tr|Q8WUS7|Q8WUS7_HUMAN	tr|A0A024R1U0|A0A024R1U0_HUMAN;sp|P46060|RAGP1_HUMAN;tr|B4DY16|B4DY16_HUMAN;tr|B4E0U0|B4E0U0_HUMAN	tr|A0A024R1U0|A0A024R1U0_HUMAN Ran GTPase activating protein 1, isoform CRA_d OS=Homo sapiens OX=9606 GN=RANGAP1 PE=4 SV=1;sp|P46060|RAGP1_HUMAN Ran GTPase-activating protein 1 OS=Homo sapiens OX=9606 GN=RANGAP1 PE=1 SV=1;tr|B4DY16|B4DY16_HUMAN cDNA FLJ513	153280000	158030000	161120000	151500000	163260000	171070000	170690000	181270000
tr|A0A024R1U4|A0A024R1U4_HUMAN;sp|P51148|RAB5C_HUMAN;tr|K7ERI8|K7ERI8_HUMAN;tr|K7ERQ8|K7ERQ8_HUMAN;tr|F8VVK3|F8VVK3_HUMAN;tr|K7ENY4|K7ENY4_HUMAN;tr|F8VWU4|F8VWU4_HUMAN;tr|F8VVZ0|F8VVZ0_HUMAN;tr|F8VUA5|F8VUA5_HUMAN;tr|F8VSF8|F8VSF8_HUMAN;tr|A0A0K6GG44|A0A0K6GG44_9HOMO;tr|K7EIP6|K7EIP6_HUMAN;tr|F8WCY6|F8WCY6_HUMAN;tr|F8WD79|F8WD79_HUMAN;tr|F8VPW9|F8VPW9_HUMAN;tr|F8VWZ7|F8VWZ7_HUMAN	tr|A0A024R1U4|A0A024R1U4_HUMAN;sp|P51148|RAB5C_HUMAN;tr|K7ERI8|K7ERI8_HUMAN;tr|K7ERQ8|K7ERQ8_HUMAN;tr|F8VVK3|F8VVK3_HUMAN;tr|K7ENY4|K7ENY4_HUMAN	tr|A0A024R1U4|A0A024R1U4_HUMAN RAB5C, member RAS oncogene family, isoform CRA_a OS=Homo sapiens OX=9606 GN=RAB5C PE=4 SV=1;sp|P51148|RAB5C_HUMAN Ras-related protein Rab-5C OS=Homo sapiens OX=9606 GN=RAB5C PE=1 SV=2;tr|K7ERI8|K7ERI8_HUMAN Uncharacterized pr	245860000	236020000	256400000	256420000	244280000	228410000	228140000	244800000
tr|A0A024R1Y2|A0A024R1Y2_HUMAN;tr|A0A024R1T9|A0A024R1T9_HUMAN;sp|P53396|ACLY_HUMAN;tr|Q4LE36|Q4LE36_HUMAN;tr|Q8N9C4|Q8N9C4_HUMAN;tr|K7ESG8|K7ESG8_HUMAN;tr|K7EIE7|K7EIE7_HUMAN	tr|A0A024R1Y2|A0A024R1Y2_HUMAN;tr|A0A024R1T9|A0A024R1T9_HUMAN;sp|P53396|ACLY_HUMAN;tr|Q4LE36|Q4LE36_HUMAN;tr|Q8N9C4|Q8N9C4_HUMAN	tr|A0A024R1Y2|A0A024R1Y2_HUMAN ATP-citrate synthase OS=Homo sapiens OX=9606 GN=ACLY PE=3 SV=1;tr|A0A024R1T9|A0A024R1T9_HUMAN ATP-citrate synthase OS=Homo sapiens OX=9606 GN=ACLY PE=3 SV=1;sp|P53396|ACLY_HUMAN ATP-citrate synthase OS=Homo sapiens OX=9606 GN	793490000	793360000	752710000	815050000	841450000	783410000	808170000	814260000
tr|A0A024R1Z6|A0A024R1Z6_HUMAN;sp|Q99536|VAT1_HUMAN;tr|K7ERT7|K7ERT7_HUMAN;tr|B3KUF8|B3KUF8_HUMAN;tr|K7ESA3|K7ESA3_HUMAN;tr|K7ENX2|K7ENX2_HUMAN;tr|K7EM19|K7EM19_HUMAN;tr|K7EJM4|K7EJM4_HUMAN;tr|K7ER81|K7ER81_HUMAN	tr|A0A024R1Z6|A0A024R1Z6_HUMAN;sp|Q99536|VAT1_HUMAN;tr|K7ERT7|K7ERT7_HUMAN	tr|A0A024R1Z6|A0A024R1Z6_HUMAN Vesicle amine transport protein 1 homolog (T californica), isoform CRA_a OS=Homo sapiens OX=9606 GN=VAT1 PE=4 SV=1;sp|Q99536|VAT1_HUMAN Synaptic vesicle membrane protein VAT-1 homolog OS=Homo sapiens OX=9606 GN=VAT1 PE=1 SV=2	267390000	254050000	257630000	272700000	254470000	242990000	231090000	245150000
tr|A0A024R222|A0A024R222_HUMAN;sp|Q9Y617|SERC_HUMAN;tr|B4DHQ3|B4DHQ3_HUMAN;tr|A0A024R280|A0A024R280_HUMAN;tr|B4DHX7|B4DHX7_HUMAN;tr|A9LS35|A9LS35_HUMAN	tr|A0A024R222|A0A024R222_HUMAN;sp|Q9Y617|SERC_HUMAN;tr|B4DHQ3|B4DHQ3_HUMAN;tr|A0A024R280|A0A024R280_HUMAN	tr|A0A024R222|A0A024R222_HUMAN Phosphoserine aminotransferase OS=Homo sapiens OX=9606 GN=PSAT1 PE=3 SV=1;sp|Q9Y617|SERC_HUMAN Phosphoserine aminotransferase OS=Homo sapiens OX=9606 GN=PSAT1 PE=1 SV=2;tr|B4DHQ3|B4DHQ3_HUMAN Phosphoserine aminotransferase OS	329470000	301480000	304840000	298430000	363090000	334360000	343460000	360560000
tr|A0A024R233|A0A024R233_HUMAN;sp|Q9UDY2|ZO2_HUMAN;tr|A0A1B0GTW1|A0A1B0GTW1_HUMAN;tr|B7Z954|B7Z954_HUMAN;tr|B7Z2R3|B7Z2R3_HUMAN;tr|A0A024R225|A0A024R225_HUMAN;tr|U3KQJ2|U3KQJ2_HUMAN;tr|B1AN86|B1AN86_HUMAN	tr|A0A024R233|A0A024R233_HUMAN;sp|Q9UDY2|ZO2_HUMAN;tr|A0A1B0GTW1|A0A1B0GTW1_HUMAN;tr|B7Z954|B7Z954_HUMAN;tr|B7Z2R3|B7Z2R3_HUMAN;tr|A0A024R225|A0A024R225_HUMAN	tr|A0A024R233|A0A024R233_HUMAN Tight junction protein 2 (Zona occludens 2), isoform CRA_a OS=Homo sapiens OX=9606 GN=TJP2 PE=3 SV=1;sp|Q9UDY2|ZO2_HUMAN Tight junction protein ZO-2 OS=Homo sapiens OX=9606 GN=TJP2 PE=1 SV=2;tr|A0A1B0GTW1|A0A1B0GTW1_HUMAN Tig	94389000	88985000	102730000	102040000	97129000	98086000	95512000	96242000
tr|A0A024R277|A0A024R277_HUMAN;sp|O15269|SPTC1_HUMAN;tr|Q6NUL7|Q6NUL7_HUMAN;tr|Q59EQ4|Q59EQ4_HUMAN;tr|B4DR90|B4DR90_HUMAN	tr|A0A024R277|A0A024R277_HUMAN;sp|O15269|SPTC1_HUMAN;tr|Q6NUL7|Q6NUL7_HUMAN;tr|Q59EQ4|Q59EQ4_HUMAN	tr|A0A024R277|A0A024R277_HUMAN Serine palmitoyltransferase, long chain base subunit 1, isoform CRA_a OS=Homo sapiens OX=9606 GN=SPTLC1 PE=4 SV=1;sp|O15269|SPTC1_HUMAN Serine palmitoyltransferase 1 OS=Homo sapiens OX=9606 GN=SPTLC1 PE=1 SV=1;tr|Q6NUL7|Q6NUL	29776000	27971000	28919000	27825000	25258000	22492000	25664000	28637000
tr|A0A024R2F9|A0A024R2F9_HUMAN;sp|Q9BTV4|TMM43_HUMAN;tr|A0A0S2Z5N2|A0A0S2Z5N2_HUMAN;tr|Q8TEP9|Q8TEP9_HUMAN;tr|V9GY05|V9GY05_HUMAN	tr|A0A024R2F9|A0A024R2F9_HUMAN;sp|Q9BTV4|TMM43_HUMAN;tr|A0A0S2Z5N2|A0A0S2Z5N2_HUMAN;tr|Q8TEP9|Q8TEP9_HUMAN	tr|A0A024R2F9|A0A024R2F9_HUMAN Transmembrane protein 43 isoform 1 OS=Homo sapiens OX=9606 GN=TMEM43 PE=2 SV=1;sp|Q9BTV4|TMM43_HUMAN Transmembrane protein 43 OS=Homo sapiens OX=9606 GN=TMEM43 PE=1 SV=1;tr|A0A0S2Z5N2|A0A0S2Z5N2_HUMAN Transmembrane protein 43	106910000	112470000	104760000	109690000	102800000	107570000	101860000	95761000
tr|A0A024R2K1|A0A024R2K1_HUMAN;sp|P20339|RAB5A_HUMAN;tr|A0A0A1HAN9|A0A0A1HAN9_HUMAN	tr|A0A024R2K1|A0A024R2K1_HUMAN;sp|P20339|RAB5A_HUMAN;tr|A0A0A1HAN9|A0A0A1HAN9_HUMAN	tr|A0A024R2K1|A0A024R2K1_HUMAN RAB5A, member RAS oncogene family, isoform CRA_a OS=Homo sapiens OX=9606 GN=RAB5A PE=4 SV=1;sp|P20339|RAB5A_HUMAN Ras-related protein Rab-5A OS=Homo sapiens OX=9606 GN=RAB5A PE=1 SV=2;tr|A0A0A1HAN9|A0A0A1HAN9_HUMAN H.sapiens	31399000	26460000	33388000	33185000	24904000	28939000	33671000	32319000
tr|A0A024R2M7|A0A024R2M7_HUMAN;sp|O95747|OXSR1_HUMAN;tr|C9JIG9|C9JIG9_HUMAN;tr|F8WBK9|F8WBK9_HUMAN	tr|A0A024R2M7|A0A024R2M7_HUMAN;sp|O95747|OXSR1_HUMAN;tr|C9JIG9|C9JIG9_HUMAN	tr|A0A024R2M7|A0A024R2M7_HUMAN Oxidative-stress responsive 1, isoform CRA_a OS=Homo sapiens OX=9606 GN=OXSR1 PE=4 SV=1;sp|O95747|OXSR1_HUMAN Serine/threonine-protein kinase OSR1 OS=Homo sapiens OX=9606 GN=OXSR1 PE=1 SV=1;tr|C9JIG9|C9JIG9_HUMAN Serine/threo	101030000	98800000	107870000	105200000	82606000	86452000	91962000	95423000
tr|A0A024R2U9|A0A024R2U9_HUMAN;sp|P13798|ACPH_HUMAN;tr|C9JIF9|C9JIF9_HUMAN;tr|H7C393|H7C393_HUMAN;tr|H7C1U0|H7C1U0_HUMAN;tr|C9JLK2|C9JLK2_HUMAN;tr|F8WEH5|F8WEH5_HUMAN	tr|A0A024R2U9|A0A024R2U9_HUMAN;sp|P13798|ACPH_HUMAN;tr|C9JIF9|C9JIF9_HUMAN;tr|H7C393|H7C393_HUMAN	tr|A0A024R2U9|A0A024R2U9_HUMAN N-acylaminoacyl-peptide hydrolase, isoform CRA_b OS=Homo sapiens OX=9606 GN=APEH PE=4 SV=1;sp|P13798|ACPH_HUMAN Acylamino-acid-releasing enzyme OS=Homo sapiens OX=9606 GN=APEH PE=1 SV=4;tr|C9JIF9|C9JIF9_HUMAN Acylamino-acid-r	102490000	88468000	87095000	89604000	109740000	102580000	102480000	109000000
tr|A0A024R324|A0A024R324_HUMAN;sp|P61586|RHOA_HUMAN;tr|B4DKN9|B4DKN9_HUMAN;tr|C9JNR4|C9JNR4_HUMAN;tr|C9JX21|C9JX21_HUMAN;tr|C9JRM1|C9JRM1_HUMAN;tr|A0A0B6XK12|A0A0B6XK12_HUMAN;tr|Q9BVT0|Q9BVT0_HUMAN;sp|P62745|RHOB_HUMAN	tr|A0A024R324|A0A024R324_HUMAN;sp|P61586|RHOA_HUMAN;tr|B4DKN9|B4DKN9_HUMAN;tr|C9JNR4|C9JNR4_HUMAN;tr|C9JX21|C9JX21_HUMAN	tr|A0A024R324|A0A024R324_HUMAN Ras homolog gene family, member A, isoform CRA_a OS=Homo sapiens OX=9606 GN=RHOA PE=4 SV=1;sp|P61586|RHOA_HUMAN Transforming protein RhoA OS=Homo sapiens OX=9606 GN=RHOA PE=1 SV=1;tr|B4DKN9|B4DKN9_HUMAN cDNA FLJ57740, highly	654620000	594440000	629470000	596600000	535270000	559450000	536250000	541280000
tr|A0A024R326|A0A024R326_HUMAN;sp|P47914|RL29_HUMAN;tr|Q6IPI1|Q6IPI1_HUMAN	tr|A0A024R326|A0A024R326_HUMAN;sp|P47914|RL29_HUMAN;tr|Q6IPI1|Q6IPI1_HUMAN	tr|A0A024R326|A0A024R326_HUMAN 60S ribosomal protein L29 OS=Homo sapiens OX=9606 GN=RPL29 PE=1 SV=1;sp|P47914|RL29_HUMAN 60S ribosomal protein L29 OS=Homo sapiens OX=9606 GN=RPL29 PE=1 SV=2;tr|Q6IPI1|Q6IPI1_HUMAN 60S ribosomal protein L29 OS=Homo sapiens O	204200000	241660000	257200000	260590000	163020000	195060000	261220000	267560000
tr|A0A024R388|A0A024R388_HUMAN;sp|Q9NXG2|THUM1_HUMAN;tr|Q6MZT3|Q6MZT3_HUMAN;tr|H3BNW0|H3BNW0_HUMAN;tr|B4DFY9|B4DFY9_HUMAN;tr|O60362|O60362_HUMAN	tr|A0A024R388|A0A024R388_HUMAN;sp|Q9NXG2|THUM1_HUMAN;tr|Q6MZT3|Q6MZT3_HUMAN;tr|H3BNW0|H3BNW0_HUMAN;tr|B4DFY9|B4DFY9_HUMAN;tr|O60362|O60362_HUMAN	tr|A0A024R388|A0A024R388_HUMAN THUMP domain containing 1, isoform CRA_a OS=Homo sapiens OX=9606 GN=THUMPD1 PE=4 SV=1;sp|Q9NXG2|THUM1_HUMAN THUMP domain-containing protein 1 OS=Homo sapiens OX=9606 GN=THUMPD1 PE=1 SV=2;tr|Q6MZT3|Q6MZT3_HUMAN Uncharacterized	25269000	23147000	28855000	30559000	22951000	29377000	27001000	29801000
tr|A0A024R394|A0A024R394_HUMAN;sp|Q9UHD1|CHRD1_HUMAN;tr|A0A024R3C3|A0A024R3C3_HUMAN;tr|E9PPQ5|E9PPQ5_HUMAN;tr|E9PIZ4|E9PIZ4_HUMAN;tr|E9PSD5|E9PSD5_HUMAN;tr|E9PHZ2|E9PHZ2_HUMAN;tr|Q9NZ93|Q9NZ93_HUMAN;tr|E9PL00|E9PL00_HUMAN;tr|E9PIF7|E9PIF7_HUMAN	tr|A0A024R394|A0A024R394_HUMAN;sp|Q9UHD1|CHRD1_HUMAN;tr|A0A024R3C3|A0A024R3C3_HUMAN;tr|E9PPQ5|E9PPQ5_HUMAN	tr|A0A024R394|A0A024R394_HUMAN Cysteine and histidine-rich domain (CHORD)-containing 1, isoform CRA_c OS=Homo sapiens OX=9606 GN=CHORDC1 PE=4 SV=1;sp|Q9UHD1|CHRD1_HUMAN Cysteine and histidine-rich domain-containing protein 1 OS=Homo sapiens OX=9606 GN=CHOR	57006000	48040000	54932000	33468000	55433000	45693000	61964000	76506000
tr|A0A024R3J7|A0A024R3J7_HUMAN;sp|P46977|STT3A_HUMAN;tr|A0A0C4DH80|A0A0C4DH80_HUMAN;tr|E9PN73|E9PN73_HUMAN;tr|E9PI32|E9PI32_HUMAN;tr|H0YET6|H0YET6_HUMAN	tr|A0A024R3J7|A0A024R3J7_HUMAN;sp|P46977|STT3A_HUMAN	tr|A0A024R3J7|A0A024R3J7_HUMAN HCG2032701, isoform CRA_a OS=Homo sapiens OX=9606 GN=hCG_2032701 PE=4 SV=1;sp|P46977|STT3A_HUMAN Dolichyl-diphosphooligosaccharide--protein glycosyltransferase subunit STT3A OS=Homo sapiens OX=9606 GN=STT3A PE=1 SV=2	59642000	60120000	61432000	62135000	59756000	53065000	57028000	62094000
tr|A0A024R3P9|A0A024R3P9_HUMAN;sp|Q9H3P7|GCP60_HUMAN	tr|A0A024R3P9|A0A024R3P9_HUMAN;sp|Q9H3P7|GCP60_HUMAN	tr|A0A024R3P9|A0A024R3P9_HUMAN Acyl-Coenzyme A binding domain containing 3, isoform CRA_a OS=Homo sapiens OX=9606 GN=ACBD3 PE=4 SV=1;sp|Q9H3P7|GCP60_HUMAN Golgi resident protein GCP60 OS=Homo sapiens OX=9606 GN=ACBD3 PE=1 SV=4	36280000	33401000	28083000	33402000	34520000	25066000	29741000	27907000
tr|A0A024R3V0|A0A024R3V0_HUMAN;sp|Q9NUQ6|SPS2L_HUMAN;tr|B8ZZZ7|B8ZZZ7_HUMAN;tr|F8W6C2|F8W6C2_HUMAN;tr|F2Z2S1|F2Z2S1_HUMAN;tr|C9JKE4|C9JKE4_HUMAN;tr|F8VZ02|F8VZ02_HUMAN;tr|F8VT91|F8VT91_HUMAN;tr|C9JGM8|C9JGM8_HUMAN;tr|Q4ZFW0|Q4ZFW0_HUMAN;tr|F8WAV0|F8WAV0_HUMAN;tr|C9IZC3|C9IZC3_HUMAN;tr|C9J8M7|C9J8M7_HUMAN;tr|C9JW67|C9JW67_HUMAN	tr|A0A024R3V0|A0A024R3V0_HUMAN;sp|Q9NUQ6|SPS2L_HUMAN;tr|B8ZZZ7|B8ZZZ7_HUMAN	tr|A0A024R3V0|A0A024R3V0_HUMAN DNA polymerase-transactivated protein 6, isoform CRA_a OS=Homo sapiens OX=9606 GN=DNAPTP6 PE=4 SV=1;sp|Q9NUQ6|SPS2L_HUMAN SPATS2-like protein OS=Homo sapiens OX=9606 GN=SPATS2L PE=1 SV=2;tr|B8ZZZ7|B8ZZZ7_HUMAN DNA polymerase-	109750000	98653000	99793000	109130000	82513000	76125000	78094000	83162000
tr|A0A024R3W7|A0A024R3W7_HUMAN;sp|P24534|EF1B_HUMAN;tr|A4D1M6|A4D1M6_HUMAN;tr|C9JZW3|C9JZW3_HUMAN;tr|F2Z2G2|F2Z2G2_HUMAN;tr|F8WF65|F8WF65_HUMAN	tr|A0A024R3W7|A0A024R3W7_HUMAN;sp|P24534|EF1B_HUMAN;tr|A4D1M6|A4D1M6_HUMAN	tr|A0A024R3W7|A0A024R3W7_HUMAN Eukaryotic translation elongation factor 1 beta 2, isoform CRA_a OS=Homo sapiens OX=9606 GN=EEF1B2 PE=3 SV=1;sp|P24534|EF1B_HUMAN Elongation factor 1-beta OS=Homo sapiens OX=9606 GN=EEF1B2 PE=1 SV=3;tr|A4D1M6|A4D1M6_HUMAN HCG	1168400000	1065300000	1031000000	1031300000	1148900000	1264500000	1202800000	1289700000
tr|A0A024R3X4|A0A024R3X4_HUMAN;sp|P10809|CH60_HUMAN;tr|B7Z597|B7Z597_HUMAN;tr|B3GQS7|B3GQS7_HUMAN;tr|B7Z5E7|B7Z5E7_HUMAN;tr|B7Z4F6|B7Z4F6_HUMAN;tr|B7Z532|B7Z532_HUMAN;tr|Q53SE2|Q53SE2_HUMAN;tr|E7ESH4|E7ESH4_HUMAN;tr|E7EXB4|E7EXB4_HUMAN;tr|B9VPB4|B9VPB4_HUMAN;tr|B9VP19|B9VP19_HUMAN;tr|Q53QD5|Q53QD5_HUMAN;tr|A0A0S2Z415|A0A0S2Z415_HUMAN;tr|C9JL25|C9JL25_HUMAN;tr|C9JL19|C9JL19_HUMAN;tr|C9JCQ4|C9JCQ4_…	tr|A0A024R3X4|A0A024R3X4_HUMAN;sp|P10809|CH60_HUMAN;tr|B7Z597|B7Z597_HUMAN;tr|B3GQS7|B3GQS7_HUMAN;tr|B7Z5E7|B7Z5E7_HUMAN;tr|B7Z4F6|B7Z4F6_HUMAN	tr|A0A024R3X4|A0A024R3X4_HUMAN Heat shock 60kDa protein 1 (Chaperonin), isoform CRA_a OS=Homo sapiens OX=9606 GN=HSPD1 PE=2 SV=1;sp|P10809|CH60_HUMAN 60 kDa heat shock protein, mitochondrial OS=Homo sapiens OX=9606 GN=HSPD1 PE=1 SV=2;tr|B7Z597|B7Z597_HUMAN	3069300000	2856300000	2885100000	3483300000	3301600000	3327100000	3411800000	3263500000
tr|A0A024R3Z6|A0A024R3Z6_HUMAN;sp|Q7L1Q6|BZW1_HUMAN;tr|Q53FN7|Q53FN7_HUMAN;tr|D3DN77|D3DN77_HUMAN;tr|C9IZ80|C9IZ80_HUMAN;tr|B3KU41|B3KU41_HUMAN;tr|C9JFN4|C9JFN4_HUMAN;tr|H0Y503|H0Y503_HUMAN;tr|C9J188|C9J188_HUMAN;tr|C9JWF5|C9JWF5_HUMAN;tr|C9JV57|C9JV57_HUMAN;tr|Q3LIC9|Q3LIC9_HUMAN	tr|A0A024R3Z6|A0A024R3Z6_HUMAN;sp|Q7L1Q6|BZW1_HUMAN;tr|Q53FN7|Q53FN7_HUMAN;tr|D3DN77|D3DN77_HUMAN;tr|C9IZ80|C9IZ80_HUMAN;tr|B3KU41|B3KU41_HUMAN	tr|A0A024R3Z6|A0A024R3Z6_HUMAN Basic leucine zipper and W2 domains 1, isoform CRA_a OS=Homo sapiens OX=9606 GN=BZW1 PE=4 SV=1;sp|Q7L1Q6|BZW1_HUMAN Basic leucine zipper and W2 domain-containing protein 1 OS=Homo sapiens OX=9606 GN=BZW1 PE=1 SV=1;tr|Q53FN7|Q	141820000	132830000	132190000	149010000	150450000	173510000	164370000	152270000
tr|A0A024R497|A0A024R497_HUMAN;sp|O95573|ACSL3_HUMAN;tr|B3KN05|B3KN05_HUMAN;tr|B2RBE0|B2RBE0_HUMAN;tr|B3KMA6|B3KMA6_HUMAN;tr|Q6PIM8|Q6PIM8_HUMAN;tr|F5H062|F5H062_HUMAN;tr|C9JC11|C9JC11_HUMAN	tr|A0A024R497|A0A024R497_HUMAN;sp|O95573|ACSL3_HUMAN;tr|B3KN05|B3KN05_HUMAN;tr|B2RBE0|B2RBE0_HUMAN;tr|B3KMA6|B3KMA6_HUMAN	tr|A0A024R497|A0A024R497_HUMAN Acyl-CoA synthetase long-chain family member 3, isoform CRA_a OS=Homo sapiens OX=9606 GN=ACSL3 PE=4 SV=1;sp|O95573|ACSL3_HUMAN Long-chain-fatty-acid--CoA ligase 3 OS=Homo sapiens OX=9606 GN=ACSL3 PE=1 SV=3;tr|B3KN05|B3KN05_HU	69480000	65389000	58985000	71992000	22198000	41461000	44970000	52074000
tr|A0A024R4E5|A0A024R4E5_HUMAN;tr|B2R5V9|B2R5V9_HUMAN;sp|Q00341|VIGLN_HUMAN;tr|H0Y394|H0Y394_HUMAN;tr|B4DKR8|B4DKR8_HUMAN;tr|Q6ZS03|Q6ZS03_HUMAN;tr|Q96CF6|Q96CF6_HUMAN;tr|H7C0A4|H7C0A4_HUMAN;tr|Q2HJC8|Q2HJC8_HUMAN;tr|Q6ZN49|Q6ZN49_HUMAN;tr|C9JIZ1|C9JIZ1_HUMAN;tr|Q5HYC5|Q5HYC5_HUMAN;tr|C9JHS7|C9JHS7_HUMAN;tr|C9JHZ8|C9JHZ8_HUMAN;tr|C9JES8|C9JES8_HUMAN;tr|C9JZI8|C9JZI8_HUMAN;tr|C9J5E5|C9J5E5_HUMAN;t…	tr|A0A024R4E5|A0A024R4E5_HUMAN;tr|B2R5V9|B2R5V9_HUMAN;sp|Q00341|VIGLN_HUMAN;tr|H0Y394|H0Y394_HUMAN;tr|B4DKR8|B4DKR8_HUMAN;tr|Q6ZS03|Q6ZS03_HUMAN;tr|Q96CF6|Q96CF6_HUMAN	tr|A0A024R4E5|A0A024R4E5_HUMAN High density lipoprotein binding protein (Vigilin), isoform CRA_a OS=Homo sapiens OX=9606 GN=HDLBP PE=1 SV=1;tr|B2R5V9|B2R5V9_HUMAN cDNA, FLJ92652, highly similar to Homo sapiens high density lipoprotein binding protein (vigi	235460000	228170000	215210000	220470000	205680000	219290000	191480000	226400000
tr|A0A024R4F1|A0A024R4F1_HUMAN;sp|P06733|ENOA_HUMAN;tr|E2DRY6|E2DRY6_HUMAN;tr|K7EM90|K7EM90_HUMAN;tr|A4UCS8|A4UCS8_HUMAN;tr|A4QMW8|A4QMW8_HUMAN;tr|L0R849|L0R849_HUMAN;tr|E5RI09|E5RI09_HUMAN;tr|E5RG95|E5RG95_HUMAN;tr|K7EPM1|K7EPM1_HUMAN;tr|K7EKN2|K7EKN2_HUMAN;tr|B4DUJ6|B4DUJ6_HUMAN;tr|E5RGZ4|E5RGZ4_HUMAN	tr|A0A024R4F1|A0A024R4F1_HUMAN;sp|P06733|ENOA_HUMAN;tr|E2DRY6|E2DRY6_HUMAN	tr|A0A024R4F1|A0A024R4F1_HUMAN Enolase 1, (Alpha), isoform CRA_a OS=Homo sapiens OX=9606 GN=ENO1 PE=2 SV=1;sp|P06733|ENOA_HUMAN Alpha-enolase OS=Homo sapiens OX=9606 GN=ENO1 PE=1 SV=2;tr|E2DRY6|E2DRY6_HUMAN C-myc promoter-binding protein 1 OS=Homo sapiens	15244000000	14630000000	13156000000	13292000000	12899000000	12640000000	11886000000	12077000000
tr|A0A024R4G1|A0A024R4G1_HUMAN;sp|Q8N1G4|LRC47_HUMAN	tr|A0A024R4G1|A0A024R4G1_HUMAN;sp|Q8N1G4|LRC47_HUMAN	tr|A0A024R4G1|A0A024R4G1_HUMAN Leucine rich repeat containing 47, isoform CRA_a OS=Homo sapiens OX=9606 GN=LRRC47 PE=4 SV=1;sp|Q8N1G4|LRC47_HUMAN Leucine-rich repeat-containing protein 47 OS=Homo sapiens OX=9606 GN=LRRC47 PE=1 SV=1	40894000	45859000	36113000	41693000	39456000	29832000	39040000	36544000
tr|A0A024R4M0|A0A024R4M0_HUMAN;sp|P46781|RS9_HUMAN;tr|A5D904|A5D904_HUMAN;tr|B5MCT8|B5MCT8_HUMAN;tr|C9JM19|C9JM19_HUMAN;tr|B7Z732|B7Z732_HUMAN;tr|F2Z3C0|F2Z3C0_HUMAN;tr|A8MXK4|A8MXK4_HUMAN	tr|A0A024R4M0|A0A024R4M0_HUMAN;sp|P46781|RS9_HUMAN;tr|A5D904|A5D904_HUMAN;tr|B5MCT8|B5MCT8_HUMAN;tr|C9JM19|C9JM19_HUMAN;tr|B7Z732|B7Z732_HUMAN	tr|A0A024R4M0|A0A024R4M0_HUMAN 40S ribosomal protein S9 OS=Homo sapiens OX=9606 GN=RPS9 PE=1 SV=1;sp|P46781|RS9_HUMAN 40S ribosomal protein S9 OS=Homo sapiens OX=9606 GN=RPS9 PE=1 SV=3;tr|A5D904|A5D904_HUMAN RPS9 protein (Fragment) OS=Homo sapiens OX=9606	385430000	433860000	494470000	541090000	348110000	477840000	461140000	426730000
tr|A0A024R4T4|A0A024R4T4_HUMAN;sp|P61081|UBC12_HUMAN;tr|M0QX69|M0QX69_HUMAN;tr|M0QYI6|M0QYI6_HUMAN	tr|A0A024R4T4|A0A024R4T4_HUMAN;sp|P61081|UBC12_HUMAN;tr|M0QX69|M0QX69_HUMAN	tr|A0A024R4T4|A0A024R4T4_HUMAN Ubiquitin-conjugating enzyme E2M (UBC12 homolog, yeast), isoform CRA_a OS=Homo sapiens OX=9606 GN=UBE2M PE=3 SV=1;sp|P61081|UBC12_HUMAN NEDD8-conjugating enzyme Ubc12 OS=Homo sapiens OX=9606 GN=UBE2M PE=1 SV=1;tr|M0QX69|M0QX6	100240000	93732000	92775000	97288000	88361000	93911000	88454000	93058000
tr|A0A024R4U3|A0A024R4U3_HUMAN;sp|Q14166|TTL12_HUMAN;tr|Q9BR23|Q9BR23_HUMAN;tr|V9GY16|V9GY16_HUMAN	tr|A0A024R4U3|A0A024R4U3_HUMAN;sp|Q14166|TTL12_HUMAN	tr|A0A024R4U3|A0A024R4U3_HUMAN Tubulin tyrosine ligase-like family, member 12, isoform CRA_a OS=Homo sapiens OX=9606 GN=TTLL12 PE=4 SV=1;sp|Q14166|TTL12_HUMAN Tubulin--tyrosine ligase-like protein 12 OS=Homo sapiens OX=9606 GN=TTLL12 PE=1 SV=2	53503000	49149000	43688000	53190000	59429000	53925000	54392000	56167000
tr|A0A024R4X0|A0A024R4X0_HUMAN;sp|P00387|NB5R3_HUMAN;tr|Q6ZVI6|Q6ZVI6_HUMAN;tr|B1AHF3|B1AHF3_HUMAN	tr|A0A024R4X0|A0A024R4X0_HUMAN;sp|P00387|NB5R3_HUMAN;tr|Q6ZVI6|Q6ZVI6_HUMAN	tr|A0A024R4X0|A0A024R4X0_HUMAN NADH-cytochrome b5 reductase OS=Homo sapiens OX=9606 GN=CYB5R3 PE=3 SV=1;sp|P00387|NB5R3_HUMAN NADH-cytochrome b5 reductase 3 OS=Homo sapiens OX=9606 GN=CYB5R3 PE=1 SV=3;tr|Q6ZVI6|Q6ZVI6_HUMAN NADH-cytochrome b5 reductase OS=	285950000	267070000	266480000	303640000	206340000	205680000	204800000	219320000
tr|A0A024R4Z6|A0A024R4Z6_HUMAN;sp|Q08945|SSRP1_HUMAN;tr|E9PMD4|E9PMD4_HUMAN;tr|A0A0U1RRK2|A0A0U1RRK2_HUMAN;tr|E9PPZ7|E9PPZ7_HUMAN;tr|Q59GH7|Q59GH7_HUMAN;tr|A0A2P9AU67|A0A2P9AU67_HUMAN	tr|A0A024R4Z6|A0A024R4Z6_HUMAN;sp|Q08945|SSRP1_HUMAN	tr|A0A024R4Z6|A0A024R4Z6_HUMAN FACT complex subunit SSRP1 OS=Homo sapiens OX=9606 GN=SSRP1 PE=3 SV=1;sp|Q08945|SSRP1_HUMAN FACT complex subunit SSRP1 OS=Homo sapiens OX=9606 GN=SSRP1 PE=1 SV=1	283650000	270990000	254990000	261720000	297260000	290120000	292030000	281470000
tr|A0A024R542|A0A024R542_HUMAN;sp|Q9C0C2|TB182_HUMAN;tr|B3KXS7|B3KXS7_HUMAN;tr|E9PKK0|E9PKK0_HUMAN;tr|Q86TK2|Q86TK2_HUMAN;tr|E9PKE7|E9PKE7_HUMAN	tr|A0A024R542|A0A024R542_HUMAN;sp|Q9C0C2|TB182_HUMAN	tr|A0A024R542|A0A024R542_HUMAN Tankyrase 1 binding protein 1, 182kDa, isoform CRA_a OS=Homo sapiens OX=9606 GN=TNKS1BP1 PE=2 SV=1;sp|Q9C0C2|TB182_HUMAN 182 kDa tankyrase-1-binding protein OS=Homo sapiens OX=9606 GN=TNKS1BP1 PE=1 SV=4	65415000	60011000	57251000	51325000	60199000	56023000	51445000	63912000
tr|A0A024R566|A0A024R566_HUMAN;tr|A0A024R588|A0A024R588_HUMAN;tr|B4DJU4|B4DJU4_HUMAN;tr|A0A024R5D9|A0A024R5D9_HUMAN;tr|A0A024R572|A0A024R572_HUMAN;sp|Q15637|SF01_HUMAN;tr|B4DSE4|B4DSE4_HUMAN;tr|B4DX42|B4DX42_HUMAN;tr|Q14820|Q14820_HUMAN;tr|F8WEV5|F8WEV5_HUMAN;tr|C9J792|C9J792_HUMAN	tr|A0A024R566|A0A024R566_HUMAN;tr|A0A024R588|A0A024R588_HUMAN;tr|B4DJU4|B4DJU4_HUMAN;tr|A0A024R5D9|A0A024R5D9_HUMAN;tr|A0A024R572|A0A024R572_HUMAN;sp|Q15637|SF01_HUMAN;tr|B4DSE4|B4DSE4_HUMAN;tr|B4DX42|B4DX42_HUMAN	tr|A0A024R566|A0A024R566_HUMAN Splicing factor 1, isoform CRA_a OS=Homo sapiens OX=9606 GN=SF1 PE=4 SV=1;tr|A0A024R588|A0A024R588_HUMAN Splicing factor 1, isoform CRA_d OS=Homo sapiens OX=9606 GN=SF1 PE=4 SV=1;tr|B4DJU4|B4DJU4_HUMAN cDNA FLJ53344, highly s	177490000	163060000	164180000	184630000	174080000	175450000	164360000	180940000
tr|A0A024R5C4|A0A024R5C4_HUMAN;tr|B7Z4M1|B7Z4M1_HUMAN;tr|B7Z3E3|B7Z3E3_HUMAN;tr|B7Z8W8|B7Z8W8_HUMAN;sp|O95197|RTN3_HUMAN;tr|Q7RTN4|Q7RTN4_HUMAN;tr|F5H891|F5H891_HUMAN;tr|F5GWG7|F5GWG7_HUMAN;tr|F5H617|F5H617_HUMAN;tr|B7Z361|B7Z361_HUMAN	tr|A0A024R5C4|A0A024R5C4_HUMAN;tr|B7Z4M1|B7Z4M1_HUMAN;tr|B7Z3E3|B7Z3E3_HUMAN;tr|B7Z8W8|B7Z8W8_HUMAN;sp|O95197|RTN3_HUMAN	tr|A0A024R5C4|A0A024R5C4_HUMAN Reticulon OS=Homo sapiens OX=9606 GN=RTN3 PE=4 SV=1;tr|B7Z4M1|B7Z4M1_HUMAN Reticulon OS=Homo sapiens OX=9606 GN=RTN3 PE=1 SV=1;tr|B7Z3E3|B7Z3E3_HUMAN Reticulon OS=Homo sapiens OX=9606 PE=2 SV=1;tr|B7Z8W8|B7Z8W8_HUMAN Reticulo	153360000	141640000	163500000	136800000	147070000	163750000	157600000	167200000
tr|A0A024R5C5|A0A024R5C5_HUMAN;sp|P11498|PYC_HUMAN;tr|E9PRE7|E9PRE7_HUMAN;tr|E9PS68|E9PS68_HUMAN	tr|A0A024R5C5|A0A024R5C5_HUMAN;sp|P11498|PYC_HUMAN	tr|A0A024R5C5|A0A024R5C5_HUMAN Pyruvate carboxylase OS=Homo sapiens OX=9606 GN=PC PE=4 SV=1;sp|P11498|PYC_HUMAN Pyruvate carboxylase, mitochondrial OS=Homo sapiens OX=9606 GN=PC PE=1 SV=2	62075000	51130000	44654000	83112000	25192000	26087000	18243000	31662000
tr|A0A024R5H0|A0A024R5H0_HUMAN;sp|O75531|BAF_HUMAN;tr|B2R4V4|B2R4V4_HUMAN	tr|A0A024R5H0|A0A024R5H0_HUMAN;sp|O75531|BAF_HUMAN;tr|B2R4V4|B2R4V4_HUMAN	tr|A0A024R5H0|A0A024R5H0_HUMAN Barrier to autointegration factor 1, isoform CRA_a OS=Homo sapiens OX=9606 GN=BANF1 PE=4 SV=1;sp|O75531|BAF_HUMAN Barrier-to-autointegration factor OS=Homo sapiens OX=9606 GN=BANF1 PE=1 SV=1;tr|B2R4V4|B2R4V4_HUMAN cDNA, FLJ92	452110000	463740000	433470000	374790000	494110000	532290000	453920000	513060000
tr|A0A024R5K1|A0A024R5K1_HUMAN;sp|Q9BR76|COR1B_HUMAN;tr|Q9NSK3|Q9NSK3_HUMAN;tr|A0A087WW53|A0A087WW53_HUMAN;tr|F5H390|F5H390_HUMAN;tr|Q59F81|Q59F81_HUMAN;tr|B4DIU2|B4DIU2_HUMAN;tr|F5H0D2|F5H0D2_HUMAN;sp|A9Z1Z3|FR1L4_HUMAN;tr|Q2NNQ8|Q2NNQ8_HUMAN	tr|A0A024R5K1|A0A024R5K1_HUMAN;sp|Q9BR76|COR1B_HUMAN;tr|Q9NSK3|Q9NSK3_HUMAN	tr|A0A024R5K1|A0A024R5K1_HUMAN Coronin OS=Homo sapiens OX=9606 GN=CORO1B PE=3 SV=1;sp|Q9BR76|COR1B_HUMAN Coronin-1B OS=Homo sapiens OX=9606 GN=CORO1B PE=1 SV=1;tr|Q9NSK3|Q9NSK3_HUMAN Uncharacterized protein DKFZp762I166 (Fragment) OS=Homo sapiens OX=9606 G	250740000	251140000	243890000	239550000	262460000	285960000	250390000	251280000
tr|A0A024R5K8|A0A024R5K8_HUMAN;sp|P50454|SERPH_HUMAN;tr|B4DN87|B4DN87_HUMAN;tr|A8K259|A8K259_HUMAN;tr|E9PPV6|E9PPV6_HUMAN;tr|E9PR70|E9PR70_HUMAN;tr|E9PKH2|E9PKH2_HUMAN;tr|E9PK86|E9PK86_HUMAN;tr|E9PMI5|E9PMI5_HUMAN;tr|Q9NPA9|Q9NPA9_HUMAN;tr|E9PNX1|E9PNX1_HUMAN;tr|E9PJH8|E9PJH8_HUMAN;tr|E9PIG2|E9PIG2_HUMAN;tr|E9PRS3|E9PRS3_HUMAN;tr|E9PQ34|E9PQ34_HUMAN;tr|E9PLA6|E9PLA6_HUMAN;tr|H0YEP8|H0YEP8_HUMAN	tr|A0A024R5K8|A0A024R5K8_HUMAN;sp|P50454|SERPH_HUMAN;tr|B4DN87|B4DN87_HUMAN;tr|A8K259|A8K259_HUMAN;tr|E9PPV6|E9PPV6_HUMAN;tr|E9PR70|E9PR70_HUMAN;tr|E9PKH2|E9PKH2_HUMAN;tr|E9PK86|E9PK86_HUMAN;tr|E9PMI5|E9PMI5_HUMAN	tr|A0A024R5K8|A0A024R5K8_HUMAN Serpin peptidase inhibitor, clade H (Heat shock protein 47), member 1, (Collagen binding protein 1), isoform CRA_a OS=Homo sapiens OX=9606 GN=SERPINH1 PE=3 SV=1;sp|P50454|SERPH_HUMAN Serpin H1 OS=Homo sapiens OX=9606 GN=SERPI	981500000	938730000	886730000	955510000	1004800000	953770000	885920000	921090000
tr|A0A024R5M3|A0A024R5M3_HUMAN;tr|Q53HG7|Q53HG7_HUMAN;sp|Q14247|SRC8_HUMAN;tr|Q76MU0|Q76MU0_HUMAN;tr|B3KRK4|B3KRK4_HUMAN;tr|B4E358|B4E358_HUMAN;tr|H0YCD9|H0YCD9_HUMAN;tr|A0A0B6XJY7|A0A0B6XJY7_HUMAN;tr|H0YEV2|H0YEV2_HUMAN	tr|A0A024R5M3|A0A024R5M3_HUMAN;tr|Q53HG7|Q53HG7_HUMAN;sp|Q14247|SRC8_HUMAN;tr|Q76MU0|Q76MU0_HUMAN	tr|A0A024R5M3|A0A024R5M3_HUMAN Cortactin, isoform CRA_c OS=Homo sapiens OX=9606 GN=CTTN PE=4 SV=1;tr|Q53HG7|Q53HG7_HUMAN Cortactin isoform a variant (Fragment) OS=Homo sapiens OX=9606 PE=2 SV=1;sp|Q14247|SRC8_HUMAN Src substrate cortactin OS=Homo sapiens O	188160000	182110000	183790000	189240000	194680000	194810000	183890000	216610000
tr|A0A024R5M9|A0A024R5M9_HUMAN;tr|A0A087WY61|A0A087WY61_HUMAN;tr|Q59HB8|Q59HB8_HUMAN;tr|Q7Z757|Q7Z757_HUMAN;tr|Q96HN5|Q96HN5_HUMAN;tr|H0YFY6|H0YFY6_HUMAN;tr|K4DIE0|K4DIE0_HUMAN	tr|A0A024R5M9|A0A024R5M9_HUMAN;tr|A0A087WY61|A0A087WY61_HUMAN;tr|Q59HB8|Q59HB8_HUMAN;tr|Q7Z757|Q7Z757_HUMAN	tr|A0A024R5M9|A0A024R5M9_HUMAN Nuclear mitotic apparatus protein 1, isoform CRA_a OS=Homo sapiens OX=9606 GN=NUMA1 PE=4 SV=1;tr|A0A087WY61|A0A087WY61_HUMAN Nuclear mitotic apparatus protein 1 OS=Homo sapiens OX=9606 GN=NUMA1 PE=1 SV=1;tr|Q59HB8|Q59HB8_HUMA	383100000	347030000	379840000	374480000	364520000	344600000	350900000	359520000
tr|A0A024R5Q7|A0A024R5Q7_HUMAN;sp|P30520|PURA2_HUMAN;tr|B4E1L0|B4E1L0_HUMAN;tr|G3V5D8|G3V5D8_HUMAN;tr|G3V232|G3V232_HUMAN;tr|B3KTV4|B3KTV4_HUMAN;sp|Q8N142|PURA1_HUMAN	tr|A0A024R5Q7|A0A024R5Q7_HUMAN;sp|P30520|PURA2_HUMAN;tr|B4E1L0|B4E1L0_HUMAN	tr|A0A024R5Q7|A0A024R5Q7_HUMAN Adenylosuccinate synthetase isozyme 2 OS=Homo sapiens OX=9606 GN=ADSS PE=3 SV=1;sp|P30520|PURA2_HUMAN Adenylosuccinate synthetase isozyme 2 OS=Homo sapiens OX=9606 GN=ADSS PE=1 SV=3;tr|B4E1L0|B4E1L0_HUMAN Adenylosuccinate syn	204920000	187900000	179840000	165320000	178590000	181090000	188020000	176320000
tr|A0A024R5S5|A0A024R5S5_HUMAN;sp|O75822|EIF3J_HUMAN;tr|H0YGJ7|H0YGJ7_HUMAN;tr|H0YLP3|H0YLP3_HUMAN	tr|A0A024R5S5|A0A024R5S5_HUMAN;sp|O75822|EIF3J_HUMAN	tr|A0A024R5S5|A0A024R5S5_HUMAN Eukaryotic translation initiation factor 3 subunit J OS=Homo sapiens OX=9606 GN=EIF3S1 PE=3 SV=1;sp|O75822|EIF3J_HUMAN Eukaryotic translation initiation factor 3 subunit J OS=Homo sapiens OX=9606 GN=EIF3J PE=1 SV=2	109430000	108220000	109570000	98280000	119060000	110560000	117040000	123050000
tr|A0A024R608|A0A024R608_HUMAN;sp|P05386|RLA1_HUMAN;tr|Q7Z612|Q7Z612_HUMAN;tr|Q6ICQ4|Q6ICQ4_HUMAN	tr|A0A024R608|A0A024R608_HUMAN;sp|P05386|RLA1_HUMAN;tr|Q7Z612|Q7Z612_HUMAN;tr|Q6ICQ4|Q6ICQ4_HUMAN	tr|A0A024R608|A0A024R608_HUMAN Ribosomal protein, large, P1, isoform CRA_a OS=Homo sapiens OX=9606 GN=RPLP1 PE=3 SV=1;sp|P05386|RLA1_HUMAN 60S acidic ribosomal protein P1 OS=Homo sapiens OX=9606 GN=RPLP1 PE=1 SV=1;tr|Q7Z612|Q7Z612_HUMAN Acidic ribosomal ph	1377500000	1082500000	1207400000	1152600000	1030700000	1194300000	1294900000	1170400000
tr|A0A024R648|A0A024R648_HUMAN;sp|Q9Y5J7|TIM9_HUMAN;tr|G3V2F3|G3V2F3_HUMAN;tr|A0A1W2PRH9|A0A1W2PRH9_HUMAN;tr|A0A1W2PQS5|A0A1W2PQS5_HUMAN;tr|G3V502|G3V502_HUMAN	tr|A0A024R648|A0A024R648_HUMAN;sp|Q9Y5J7|TIM9_HUMAN	tr|A0A024R648|A0A024R648_HUMAN Translocase of inner mitochondrial membrane 9 homolog (Yeast), isoform CRA_a OS=Homo sapiens OX=9606 GN=TIMM9 PE=3 SV=1;sp|Q9Y5J7|TIM9_HUMAN Mitochondrial import inner membrane translocase subunit Tim9 OS=Homo sapiens OX=9606	89226000	73239000	67058000	61194000	81387000	78274000	75316000	78333000
tr|A0A024R663|A0A024R663_HUMAN;sp|Q86UP2|KTN1_HUMAN;tr|G3V4Y7|G3V4Y7_HUMAN;tr|B3KWP6|B3KWP6_HUMAN;tr|B7Z6P3|B7Z6P3_HUMAN;tr|H0YJZ8|H0YJZ8_HUMAN;tr|G3V5P0|G3V5P0_HUMAN;tr|G3V5G2|G3V5G2_HUMAN;tr|H0YJP2|H0YJP2_HUMAN;tr|B3KP76|B3KP76_HUMAN;tr|H0YJV5|H0YJV5_HUMAN;tr|Q6PDF7|Q6PDF7_HUMAN;tr|Q3SWV9|Q3SWV9_HUMAN	tr|A0A024R663|A0A024R663_HUMAN;sp|Q86UP2|KTN1_HUMAN	tr|A0A024R663|A0A024R663_HUMAN Kinectin 1 (Kinesin receptor), isoform CRA_a OS=Homo sapiens OX=9606 GN=KTN1 PE=4 SV=1;sp|Q86UP2|KTN1_HUMAN Kinectin OS=Homo sapiens OX=9606 GN=KTN1 PE=1 SV=1	675870000	621430000	642510000	696690000	451950000	452860000	470310000	489250000
tr|A0A024R694|A0A024R694_HUMAN;sp|P12814|ACTN1_HUMAN;tr|H9KV75|H9KV75_HUMAN;tr|B7Z565|B7Z565_HUMAN;tr|Q86TX4|Q86TX4_HUMAN;tr|B4DFY0|B4DFY0_HUMAN;tr|B3KUX9|B3KUX9_HUMAN;tr|B7Z2W3|B7Z2W3_HUMAN;tr|H7C5W8|H7C5W8_HUMAN;tr|G3V2N5|G3V2N5_HUMAN;tr|B4DRP5|B4DRP5_HUMAN;tr|G3V2W4|G3V2W4_HUMAN;tr|A1L0V1|A1L0V1_HUMAN;tr|H0YJW3|H0YJW3_HUMAN;tr|H0YJ11|H0YJ11_HUMAN;tr|B2R8Y4|B2R8Y4_HUMAN;sp|Q08043|ACTN3_HUMAN;tr…	tr|A0A024R694|A0A024R694_HUMAN;sp|P12814|ACTN1_HUMAN;tr|H9KV75|H9KV75_HUMAN;tr|B7Z565|B7Z565_HUMAN;tr|Q86TX4|Q86TX4_HUMAN;tr|B4DFY0|B4DFY0_HUMAN	tr|A0A024R694|A0A024R694_HUMAN Actinin, alpha 1, isoform CRA_a OS=Homo sapiens OX=9606 GN=ACTN1 PE=4 SV=1;sp|P12814|ACTN1_HUMAN Alpha-actinin-1 OS=Homo sapiens OX=9606 GN=ACTN1 PE=1 SV=2;tr|H9KV75|H9KV75_HUMAN Alpha-actinin-1 OS=Homo sapiens OX=9606 GN=ACT	3160700000	2980300000	2809600000	3147800000	2902800000	2877900000	2685000000	2776300000
tr|A0A024R6D4|A0A024R6D4_HUMAN;sp|P84090|ERH_HUMAN;tr|G3V279|G3V279_HUMAN	tr|A0A024R6D4|A0A024R6D4_HUMAN;sp|P84090|ERH_HUMAN;tr|G3V279|G3V279_HUMAN	tr|A0A024R6D4|A0A024R6D4_HUMAN Enhancer of rudimentary homolog OS=Homo sapiens OX=9606 GN=ERH PE=3 SV=1;sp|P84090|ERH_HUMAN Enhancer of rudimentary homolog OS=Homo sapiens OX=9606 GN=ERH PE=1 SV=1;tr|G3V279|G3V279_HUMAN Enhancer of rudimentary homolog OS=H	314630000	283260000	287830000	303980000	320410000	337760000	276600000	306500000
tr|A0A024R6I3|A0A024R6I3_HUMAN;sp|P49755|TMEDA_HUMAN;tr|Q53GF9|Q53GF9_HUMAN;tr|B4DL12|B4DL12_HUMAN;tr|G3V2K7|G3V2K7_HUMAN;tr|B4DZH3|B4DZH3_HUMAN	tr|A0A024R6I3|A0A024R6I3_HUMAN;sp|P49755|TMEDA_HUMAN;tr|Q53GF9|Q53GF9_HUMAN;tr|B4DL12|B4DL12_HUMAN;tr|G3V2K7|G3V2K7_HUMAN	tr|A0A024R6I3|A0A024R6I3_HUMAN Testicular tissue protein Li 206 OS=Homo sapiens OX=9606 GN=TMED10 PE=2 SV=1;sp|P49755|TMEDA_HUMAN Transmembrane emp24 domain-containing protein 10 OS=Homo sapiens OX=9606 GN=TMED10 PE=1 SV=2;tr|Q53GF9|Q53GF9_HUMAN Full-lengt	218680000	231720000	193760000	235090000	197410000	206040000	204230000	194690000
tr|A0A024R6K8|A0A024R6K8_HUMAN;sp|P23381|SYWC_HUMAN;tr|H0YJP3|H0YJP3_HUMAN;tr|G3V277|G3V277_HUMAN;tr|G3V3H8|G3V3H8_HUMAN;tr|G3V3Y5|G3V3Y5_HUMAN;tr|B4DTK8|B4DTK8_HUMAN;tr|G3V4C7|G3V4C7_HUMAN;tr|G3V4N8|G3V4N8_HUMAN;tr|G3V5W1|G3V5W1_HUMAN;tr|G3V3S7|G3V3S7_HUMAN;tr|G3V3X0|G3V3X0_HUMAN;tr|G3V423|G3V423_HUMAN;tr|G3V3P2|G3V3P2_HUMAN;tr|G3V227|G3V227_HUMAN;tr|G3V5U1|G3V5U1_HUMAN;tr|G3V456|G3V456_HUMAN;tr…	tr|A0A024R6K8|A0A024R6K8_HUMAN;sp|P23381|SYWC_HUMAN	tr|A0A024R6K8|A0A024R6K8_HUMAN Tryptophanyl-tRNA synthetase, isoform CRA_a OS=Homo sapiens OX=9606 GN=WARS PE=3 SV=1;sp|P23381|SYWC_HUMAN Tryptophan--tRNA ligase, cytoplasmic OS=Homo sapiens OX=9606 GN=WARS PE=1 SV=2	215880000	218300000	214240000	210600000	236200000	236670000	226460000	214350000
tr|A0A024R6Y2|A0A024R6Y2_HUMAN;sp|P61970|NTF2_HUMAN;tr|H3BRV9|H3BRV9_HUMAN;tr|B4DEQ2|B4DEQ2_HUMAN	tr|A0A024R6Y2|A0A024R6Y2_HUMAN;sp|P61970|NTF2_HUMAN;tr|H3BRV9|H3BRV9_HUMAN	tr|A0A024R6Y2|A0A024R6Y2_HUMAN Nuclear transport factor 2, isoform CRA_a OS=Homo sapiens OX=9606 GN=NUTF2 PE=4 SV=1;sp|P61970|NTF2_HUMAN Nuclear transport factor 2 OS=Homo sapiens OX=9606 GN=NUTF2 PE=1 SV=1;tr|H3BRV9|H3BRV9_HUMAN Nuclear transport factor 2	168450000	159460000	138330000	101490000	131460000	134970000	135970000	128980000
tr|A0A024R6Z0|A0A024R6Z0_HUMAN;sp|O43237|DC1L2_HUMAN;tr|J3KRI4|J3KRI4_HUMAN;tr|J3KRZ2|J3KRZ2_HUMAN;tr|H3BUM4|H3BUM4_HUMAN;tr|Q63HJ8|Q63HJ8_HUMAN;tr|B4E2E0|B4E2E0_HUMAN;tr|B4DHD8|B4DHD8_HUMAN	tr|A0A024R6Z0|A0A024R6Z0_HUMAN;sp|O43237|DC1L2_HUMAN;tr|J3KRI4|J3KRI4_HUMAN	tr|A0A024R6Z0|A0A024R6Z0_HUMAN Dynein, cytoplasmic 1, light intermediate chain 2, isoform CRA_a OS=Homo sapiens OX=9606 GN=DYNC1LI2 PE=4 SV=1;sp|O43237|DC1L2_HUMAN Cytoplasmic dynein 1 light intermediate chain 2 OS=Homo sapiens OX=9606 GN=DYNC1LI2 PE=1 SV=	45985000	47269000	45419000	49008000	46672000	42390000	42467000	46850000
tr|A0A024R718|A0A024R718_HUMAN;sp|P43490|NAMPT_HUMAN;tr|A0A0C4DFS8|A0A0C4DFS8_HUMAN;tr|B7Z8W6|B7Z8W6_HUMAN;tr|C9JF35|C9JF35_HUMAN;tr|C9JG65|C9JG65_HUMAN;tr|Q658Z1|Q658Z1_HUMAN	tr|A0A024R718|A0A024R718_HUMAN;sp|P43490|NAMPT_HUMAN;tr|A0A0C4DFS8|A0A0C4DFS8_HUMAN;tr|B7Z8W6|B7Z8W6_HUMAN	tr|A0A024R718|A0A024R718_HUMAN Pre-B-cell colony enhancing factor 1, isoform CRA_a OS=Homo sapiens OX=9606 GN=PBEF1 PE=4 SV=1;sp|P43490|NAMPT_HUMAN Nicotinamide phosphoribosyltransferase OS=Homo sapiens OX=9606 GN=NAMPT PE=1 SV=1;tr|A0A0C4DFS8|A0A0C4DFS8_H	1008100000	1036900000	1024200000	949460000	945510000	984130000	969240000	999210000
tr|A0A024R745|A0A024R745_HUMAN;sp|Q16718|NDUA5_HUMAN;tr|A0A087X1G1|A0A087X1G1_HUMAN;tr|H7BYD0|H7BYD0_HUMAN;tr|F8WAS3|F8WAS3_HUMAN;tr|A0A024R772|A0A024R772_HUMAN;tr|A0A087WXR5|A0A087WXR5_HUMAN;tr|C9IZN5|C9IZN5_HUMAN;tr|A0A024R736|A0A024R736_HUMAN	tr|A0A024R745|A0A024R745_HUMAN;sp|Q16718|NDUA5_HUMAN;tr|A0A087X1G1|A0A087X1G1_HUMAN;tr|H7BYD0|H7BYD0_HUMAN;tr|F8WAS3|F8WAS3_HUMAN	tr|A0A024R745|A0A024R745_HUMAN NADH dehydrogenase (Ubiquinone) 1 alpha subcomplex, 5, 13kDa, isoform CRA_b OS=Homo sapiens OX=9606 GN=NDUFA5 PE=4 SV=1;sp|Q16718|NDUA5_HUMAN NADH dehydrogenase [ubiquinone] 1 alpha subcomplex subunit 5 OS=Homo sapiens OX=960	28673000	32281000	30606000	32721000	29685000	27869000	30398000	29960000
tr|A0A024R7A8|A0A024R7A8_HUMAN;sp|P15121|ALDR_HUMAN;tr|Q59EL5|Q59EL5_HUMAN;tr|E9PCX2|E9PCX2_HUMAN;tr|E9PEF9|E9PEF9_HUMAN	tr|A0A024R7A8|A0A024R7A8_HUMAN;sp|P15121|ALDR_HUMAN;tr|Q59EL5|Q59EL5_HUMAN;tr|E9PCX2|E9PCX2_HUMAN	tr|A0A024R7A8|A0A024R7A8_HUMAN Aldo-keto reductase family 1, member B1 (Aldose reductase), isoform CRA_a OS=Homo sapiens OX=9606 GN=AKR1B1 PE=4 SV=1;sp|P15121|ALDR_HUMAN Aldose reductase OS=Homo sapiens OX=9606 GN=AKR1B1 PE=1 SV=3;tr|Q59EL5|Q59EL5_HUMAN Al	118190000	120180000	115370000	100980000	167130000	166970000	156890000	155920000
tr|A0A024R7B7|A0A024R7B7_HUMAN;sp|Q16543|CDC37_HUMAN;tr|K7EQA9|K7EQA9_HUMAN;tr|K7EKQ2|K7EKQ2_HUMAN;tr|A1L0W4|A1L0W4_HUMAN;tr|K7EL68|K7EL68_HUMAN;tr|K7EIU0|K7EIU0_HUMAN;tr|K7EJ06|K7EJ06_HUMAN	tr|A0A024R7B7|A0A024R7B7_HUMAN;sp|Q16543|CDC37_HUMAN;tr|K7EQA9|K7EQA9_HUMAN;tr|K7EKQ2|K7EKQ2_HUMAN	tr|A0A024R7B7|A0A024R7B7_HUMAN CDC37 cell division cycle 37 homolog (S. cerevisiae), isoform CRA_a OS=Homo sapiens OX=9606 GN=CDC37 PE=4 SV=1;sp|Q16543|CDC37_HUMAN Hsp90 co-chaperone Cdc37 OS=Homo sapiens OX=9606 GN=CDC37 PE=1 SV=1;tr|K7EQA9|K7EQA9_HUMAN H	677550000	604920000	650530000	680350000	779720000	704560000	677600000	776470000
tr|A0A024R7D0|A0A024R7D0_HUMAN;sp|P49366|DHYS_HUMAN;tr|A0A087WZK0|A0A087WZK0_HUMAN;tr|A0A024R7G5|A0A024R7G5_HUMAN;tr|A0A024R7E9|A0A024R7E9_HUMAN;tr|Q5J8M5|Q5J8M5_HUMAN;tr|M0R264|M0R264_HUMAN;tr|M0R1T2|M0R1T2_HUMAN;tr|M0R0V2|M0R0V2_HUMAN;tr|M0R1T4|M0R1T4_HUMAN;tr|M0R253|M0R253_HUMAN;tr|M0QX43|M0QX43_HUMAN;tr|B4DU50|B4DU50_HUMAN;tr|B4E3M2|B4E3M2_HUMAN;tr|M0R0J4|M0R0J4_HUMAN;tr|M0QYZ7|M0QYZ7_HUMAN	tr|A0A024R7D0|A0A024R7D0_HUMAN;sp|P49366|DHYS_HUMAN;tr|A0A087WZK0|A0A087WZK0_HUMAN;tr|A0A024R7G5|A0A024R7G5_HUMAN;tr|A0A024R7E9|A0A024R7E9_HUMAN;tr|Q5J8M5|Q5J8M5_HUMAN;tr|M0R264|M0R264_HUMAN	tr|A0A024R7D0|A0A024R7D0_HUMAN Deoxyhypusine synthase, isoform CRA_b OS=Homo sapiens OX=9606 GN=DHPS PE=4 SV=1;sp|P49366|DHYS_HUMAN Deoxyhypusine synthase OS=Homo sapiens OX=9606 GN=DHPS PE=1 SV=1;tr|A0A087WZK0|A0A087WZK0_HUMAN Deoxyhypusine synthase OS=Ho	32058000	28298000	26943000	35149000	35846000	28492000	29745000	33139000
tr|A0A024R7E0|A0A024R7E0_HUMAN;sp|Q96RE7|NACC1_HUMAN;tr|K7ENW4|K7ENW4_HUMAN;tr|A0A024R8I0|A0A024R8I0_HUMAN;sp|Q96BF6|NACC2_HUMAN	tr|A0A024R7E0|A0A024R7E0_HUMAN;sp|Q96RE7|NACC1_HUMAN	tr|A0A024R7E0|A0A024R7E0_HUMAN BTB (POZ) domain containing 14B, isoform CRA_a OS=Homo sapiens OX=9606 GN=BTBD14B PE=4 SV=1;sp|Q96RE7|NACC1_HUMAN Nucleus accumbens-associated protein 1 OS=Homo sapiens OX=9606 GN=NACC1 PE=1 SV=1	11410000	9609600	13728000	11022000	14814000	13673000	14744000	12937000
tr|A0A024R7F7|A0A024R7F7_HUMAN;tr|B4DRY5|B4DRY5_HUMAN;sp|O14787|TNPO2_HUMAN;tr|Q4LE60|Q4LE60_HUMAN;tr|A0A075B780|A0A075B780_HUMAN;tr|Q05D48|Q05D48_HUMAN;tr|B3KPC8|B3KPC8_HUMAN;tr|K7ESC1|K7ESC1_HUMAN;tr|K7ENW1|K7ENW1_HUMAN;tr|K7ESG1|K7ESG1_HUMAN;tr|K7EMA3|K7EMA3_HUMAN;tr|K7ELC3|K7ELC3_HUMAN	tr|A0A024R7F7|A0A024R7F7_HUMAN;tr|B4DRY5|B4DRY5_HUMAN;sp|O14787|TNPO2_HUMAN;tr|Q4LE60|Q4LE60_HUMAN;tr|A0A075B780|A0A075B780_HUMAN;tr|Q05D48|Q05D48_HUMAN;tr|B3KPC8|B3KPC8_HUMAN	tr|A0A024R7F7|A0A024R7F7_HUMAN Transportin 2 (Importin 3, karyopherin beta 2b), isoform CRA_b OS=Homo sapiens OX=9606 GN=TNPO2 PE=4 SV=1;tr|B4DRY5|B4DRY5_HUMAN cDNA FLJ54538, highly similar to Transportin-2 OS=Homo sapiens OX=9606 PE=2 SV=1;sp|O14787|TNPO2	22276000	27795000	24467000	21003000	16356000	21079000	21519000	16523000
tr|A0A024R7G8|A0A024R7G8_HUMAN;sp|P54725|RD23A_HUMAN;tr|K7ENJ0|K7ENJ0_HUMAN;tr|K7ELW1|K7ELW1_HUMAN;tr|B4DDJ7|B4DDJ7_HUMAN;tr|K7EQ16|K7EQ16_HUMAN	tr|A0A024R7G8|A0A024R7G8_HUMAN;sp|P54725|RD23A_HUMAN	tr|A0A024R7G8|A0A024R7G8_HUMAN RAD23 homolog A (S. cerevisiae), isoform CRA_a OS=Homo sapiens OX=9606 GN=RAD23A PE=4 SV=1;sp|P54725|RD23A_HUMAN UV excision repair protein RAD23 homolog A OS=Homo sapiens OX=9606 GN=RAD23A PE=1 SV=1	112290000	107150000	113720000	132170000	83723000	98900000	98316000	100240000
tr|A0A024R7I0|A0A024R7I0_HUMAN;sp|O14908|GIPC1_HUMAN;tr|A8K2I7|A8K2I7_HUMAN;tr|K7EM11|K7EM11_HUMAN;tr|A0A024R7I1|A0A024R7I1_HUMAN;tr|K7ELJ2|K7ELJ2_HUMAN;tr|K7ESN1|K7ESN1_HUMAN;sp|Q8TF64|GIPC3_HUMAN	tr|A0A024R7I0|A0A024R7I0_HUMAN;sp|O14908|GIPC1_HUMAN;tr|A8K2I7|A8K2I7_HUMAN;tr|K7EM11|K7EM11_HUMAN;tr|A0A024R7I1|A0A024R7I1_HUMAN	tr|A0A024R7I0|A0A024R7I0_HUMAN GIPC PDZ domain containing family, member 1, isoform CRA_a OS=Homo sapiens OX=9606 GN=GIPC1 PE=4 SV=1;sp|O14908|GIPC1_HUMAN PDZ domain-containing protein GIPC1 OS=Homo sapiens OX=9606 GN=GIPC1 PE=1 SV=2;tr|A8K2I7|A8K2I7_HUMAN	112100000	96919000	106660000	103910000	93801000	91416000	95193000	98771000
tr|A0A024R7I3|A0A024R7I3_HUMAN;sp|P61006|RAB8A_HUMAN;tr|H0YMN7|H0YMN7_HUMAN;tr|Q59EP4|Q59EP4_HUMAN;tr|D3DV69|D3DV69_HUMAN;tr|Q53SX4|Q53SX4_HUMAN;tr|H0YLJ8|H0YLJ8_HUMAN;tr|H0YL94|H0YL94_HUMAN;tr|B3KTE3|B3KTE3_HUMAN;tr|G5ELZ6|G5ELZ6_HUMAN;tr|M0R257|M0R257_HUMAN;tr|G5ELZ5|G5ELZ5_HUMAN;tr|Q5ISM5|Q5ISM5_MACFA;tr|G5EMR8|G5EMR8_HUMAN;sp|P59190|RAB15_HUMAN;tr|A8K6I8|A8K6I8_HUMAN;tr|A0A0A1HAV6|A0A0A1HAV6_…	tr|A0A024R7I3|A0A024R7I3_HUMAN;sp|P61006|RAB8A_HUMAN	tr|A0A024R7I3|A0A024R7I3_HUMAN RAB8A, member RAS oncogene family, isoform CRA_a OS=Homo sapiens OX=9606 GN=RAB8A PE=4 SV=1;sp|P61006|RAB8A_HUMAN Ras-related protein Rab-8A OS=Homo sapiens OX=9606 GN=RAB8A PE=1 SV=1	66458000	61322000	58312000	65453000	75567000	73515000	70319000	70120000
tr|A0A024R7K7|A0A024R7K7_HUMAN;sp|Q86YP4|P66A_HUMAN;tr|A0A024R7M6|A0A024R7M6_HUMAN;tr|B4E0Q6|B4E0Q6_HUMAN;tr|B4DKZ7|B4DKZ7_HUMAN;tr|V9GYX5|V9GYX5_HUMAN;tr|C9JVY3|C9JVY3_HUMAN;tr|V9GY85|V9GY85_HUMAN;tr|H7C3H1|H7C3H1_HUMAN;tr|C9JMI3|C9JMI3_HUMAN;tr|C9JGN4|C9JGN4_HUMAN;tr|C9JHD7|C9JHD7_HUMAN;tr|C9JJK9|C9JJK9_HUMAN;tr|A0A0U1RR30|A0A0U1RR30_HUMAN;tr|A0A0U1RRM1|A0A0U1RRM1_HUMAN;tr|B3KSZ4|B3KSZ4_HUMAN;s…	tr|A0A024R7K7|A0A024R7K7_HUMAN;sp|Q86YP4|P66A_HUMAN;tr|A0A024R7M6|A0A024R7M6_HUMAN;tr|B4E0Q6|B4E0Q6_HUMAN;tr|B4DKZ7|B4DKZ7_HUMAN	tr|A0A024R7K7|A0A024R7K7_HUMAN GATA zinc finger domain containing 2A, isoform CRA_b OS=Homo sapiens OX=9606 GN=GATAD2A PE=4 SV=1;sp|Q86YP4|P66A_HUMAN Transcriptional repressor p66-alpha OS=Homo sapiens OX=9606 GN=GATAD2A PE=1 SV=1;tr|A0A024R7M6|A0A024R7M6_	10839000	12689000	13440000	9407200	16034000	14849000	13513000	15644000
tr|A0A024R7L5|A0A024R7L5_HUMAN;tr|A0A024R7L8|A0A024R7L8_HUMAN;sp|Q92900|RENT1_HUMAN;tr|B3KY55|B3KY55_HUMAN;tr|A0A059XG67|A0A059XG67_HUMAN;tr|A0A059XBJ1|A0A059XBJ1_HUMAN;tr|A0A059XAL2|A0A059XAL2_HUMAN;tr|A0A059XAJ5|A0A059XAJ5_HUMAN;tr|A0A059X4U2|A0A059X4U2_HUMAN;tr|A0A059XG73|A0A059XG73_HUMAN;tr|A0A059XBJ6|A0A059XBJ6_HUMAN;tr|A0A059XAM1|A0A059XAM1_HUMAN;tr|Q6ZUC8|Q6ZUC8_HUMAN	tr|A0A024R7L5|A0A024R7L5_HUMAN;tr|A0A024R7L8|A0A024R7L8_HUMAN;sp|Q92900|RENT1_HUMAN	tr|A0A024R7L5|A0A024R7L5_HUMAN UPF1 regulator of nonsense transcripts homolog (Yeast), isoform CRA_b OS=Homo sapiens OX=9606 GN=UPF1 PE=4 SV=1;tr|A0A024R7L8|A0A024R7L8_HUMAN UPF1 regulator of nonsense transcripts homolog (Yeast), isoform CRA_a OS=Homo sapi	113260000	114000000	109100000	117310000	133140000	129920000	132410000	127700000
tr|A0A024R7M8|A0A024R7M8_HUMAN;sp|Q96CT7|CC124_HUMAN;tr|M0R2F5|M0R2F5_HUMAN	tr|A0A024R7M8|A0A024R7M8_HUMAN;sp|Q96CT7|CC124_HUMAN	tr|A0A024R7M8|A0A024R7M8_HUMAN Uncharacterized protein OS=Homo sapiens OX=9606 GN=LOC115098 PE=4 SV=1;sp|Q96CT7|CC124_HUMAN Coiled-coil domain-containing protein 124 OS=Homo sapiens OX=9606 GN=CCDC124 PE=1 SV=1	113230000	120760000	109750000	129350000	118920000	108750000	105410000	110040000
tr|A0A024R7S3|A0A024R7S3_HUMAN;sp|P09497|CLCB_HUMAN;tr|D6RJD1|D6RJD1_HUMAN;tr|H0Y9Q6|H0Y9Q6_HUMAN	tr|A0A024R7S3|A0A024R7S3_HUMAN;sp|P09497|CLCB_HUMAN	tr|A0A024R7S3|A0A024R7S3_HUMAN Clathrin light chain OS=Homo sapiens OX=9606 GN=CLTB PE=3 SV=1;sp|P09497|CLCB_HUMAN Clathrin light chain B OS=Homo sapiens OX=9606 GN=CLTB PE=1 SV=1	162630000	141050000	150860000	152780000	145350000	140240000	151370000	149080000
tr|A0A024R7T3|A0A024R7T3_HUMAN;sp|P52597|HNRPF_HUMAN;tr|B4DKS8|B4DKS8_HUMAN;tr|A0A1B0GW42|A0A1B0GW42_HUMAN	tr|A0A024R7T3|A0A024R7T3_HUMAN;sp|P52597|HNRPF_HUMAN;tr|B4DKS8|B4DKS8_HUMAN	tr|A0A024R7T3|A0A024R7T3_HUMAN Heterogeneous nuclear ribonucleoprotein F, isoform CRA_a OS=Homo sapiens OX=9606 GN=HNRPF PE=4 SV=1;sp|P52597|HNRPF_HUMAN Heterogeneous nuclear ribonucleoprotein F OS=Homo sapiens OX=9606 GN=HNRNPF PE=1 SV=3;tr|B4DKS8|B4DKS8_	462290000	452880000	420710000	454680000	480780000	443650000	427980000	409220000
tr|A0A024R7V6|A0A024R7V6_HUMAN;sp|P61019|RAB2A_HUMAN;tr|E9PKL7|E9PKL7_HUMAN;tr|A0A0A1HAW1|A0A0A1HAW1_HUMAN;tr|Q5HYI5|Q5HYI5_HUMAN;sp|Q8WUD1|RAB2B_HUMAN;tr|H7C125|H7C125_HUMAN;tr|B4DUD4|B4DUD4_HUMAN;tr|O75546|O75546_HUMAN;tr|Q96K32|Q96K32_HUMAN;tr|E9PE37|E9PE37_HUMAN;tr|H0YD31|H0YD31_HUMAN;tr|Q9UL31|Q9UL31_HUMAN;tr|H0YDL5|H0YDL5_HUMAN;tr|A0A023HJ61|A0A023HJ61_HUMAN	tr|A0A024R7V6|A0A024R7V6_HUMAN;sp|P61019|RAB2A_HUMAN;tr|E9PKL7|E9PKL7_HUMAN;tr|A0A0A1HAW1|A0A0A1HAW1_HUMAN;tr|Q5HYI5|Q5HYI5_HUMAN;sp|Q8WUD1|RAB2B_HUMAN	tr|A0A024R7V6|A0A024R7V6_HUMAN RAB2, member RAS oncogene family, isoform CRA_a OS=Homo sapiens OX=9606 GN=RAB2 PE=4 SV=1;sp|P61019|RAB2A_HUMAN Ras-related protein Rab-2A OS=Homo sapiens OX=9606 GN=RAB2A PE=1 SV=1;tr|E9PKL7|E9PKL7_HUMAN Ras-related protein	88022000	92764000	87185000	88955000	91670000	91257000	89571000	94964000
tr|A0A024R7W9|A0A024R7W9_HUMAN;sp|Q92905|CSN5_HUMAN;tr|Q59GH5|Q59GH5_HUMAN;tr|E5RHH5|E5RHH5_HUMAN;tr|E5RHF2|E5RHF2_HUMAN;tr|E5RFS1|E5RFS1_HUMAN;tr|E5RG35|E5RG35_HUMAN;tr|E5RK55|E5RK55_HUMAN;tr|H0UI27|H0UI27_HUMAN	tr|A0A024R7W9|A0A024R7W9_HUMAN;sp|Q92905|CSN5_HUMAN;tr|Q59GH5|Q59GH5_HUMAN	tr|A0A024R7W9|A0A024R7W9_HUMAN COP9 constitutive photomorphogenic homolog subunit 5 (Arabidopsis), isoform CRA_a OS=Homo sapiens OX=9606 GN=COPS5 PE=2 SV=1;sp|Q92905|CSN5_HUMAN COP9 signalosome complex subunit 5 OS=Homo sapiens OX=9606 GN=COPS5 PE=1 SV=4;t	42063000	42459000	52461000	49386000	51337000	50189000	48344000	52010000
tr|A0A024R7Y5|A0A024R7Y5_HUMAN;sp|Q15369|ELOC_HUMAN;tr|E5RHG8|E5RHG8_HUMAN;tr|R4GMY8|R4GMY8_HUMAN	tr|A0A024R7Y5|A0A024R7Y5_HUMAN;sp|Q15369|ELOC_HUMAN;tr|E5RHG8|E5RHG8_HUMAN;tr|R4GMY8|R4GMY8_HUMAN	tr|A0A024R7Y5|A0A024R7Y5_HUMAN Transcription elongation factor B (SIII), polypeptide 1 (15kDa, elongin C), isoform CRA_a OS=Homo sapiens OX=9606 GN=TCEB1 PE=3 SV=1;sp|Q15369|ELOC_HUMAN Elongin-C OS=Homo sapiens OX=9606 GN=ELOC PE=1 SV=1;tr|E5RHG8|E5RHG8_HU	150830000	151900000	141850000	165600000	180100000	165310000	161230000	155410000
tr|A0A024R7Z5|A0A024R7Z5_HUMAN;sp|O00560|SDCB1_HUMAN;tr|G5EA09|G5EA09_HUMAN;tr|B4DHN5|B4DHN5_HUMAN;tr|E9PBU7|E9PBU7_HUMAN;tr|B4DQ93|B4DQ93_HUMAN	tr|A0A024R7Z5|A0A024R7Z5_HUMAN;sp|O00560|SDCB1_HUMAN;tr|G5EA09|G5EA09_HUMAN;tr|B4DHN5|B4DHN5_HUMAN;tr|E9PBU7|E9PBU7_HUMAN;tr|B4DQ93|B4DQ93_HUMAN	tr|A0A024R7Z5|A0A024R7Z5_HUMAN Syndecan binding protein (Syntenin), isoform CRA_c OS=Homo sapiens OX=9606 GN=SDCBP PE=4 SV=1;sp|O00560|SDCB1_HUMAN Syntenin-1 OS=Homo sapiens OX=9606 GN=SDCBP PE=1 SV=1;tr|G5EA09|G5EA09_HUMAN Syndecan binding protein (Synten	82791000	62995000	63125000	70138000	78027000	90772000	84068000	67717000
tr|A0A024R806|A0A024R806_HUMAN;sp|Q9BT73|PSMG3_HUMAN	tr|A0A024R806|A0A024R806_HUMAN;sp|Q9BT73|PSMG3_HUMAN	tr|A0A024R806|A0A024R806_HUMAN Uncharacterized protein OS=Homo sapiens OX=9606 GN=MGC10911 PE=4 SV=1;sp|Q9BT73|PSMG3_HUMAN Proteasome assembly chaperone 3 OS=Homo sapiens OX=9606 GN=PSMG3 PE=1 SV=1	14313000	15581000	12130000	16464000	18410000	20216000	18825000	21609000
tr|A0A024R819|A0A024R819_HUMAN;tr|A0A024R858|A0A024R858_HUMAN;sp|P36639|8ODP_HUMAN	tr|A0A024R819|A0A024R819_HUMAN;tr|A0A024R858|A0A024R858_HUMAN;sp|P36639|8ODP_HUMAN	tr|A0A024R819|A0A024R819_HUMAN Nudix (Nucleoside diphosphate linked moiety X)-type motif 1, isoform CRA_a OS=Homo sapiens OX=9606 GN=NUDT1 PE=3 SV=1;tr|A0A024R858|A0A024R858_HUMAN Nudix (Nucleoside diphosphate linked moiety X)-type motif 1, isoform CRA_b O	21278000	19162000	20183000	18437000	13960000	18800000	17259000	19934000
tr|A0A024R821|A0A024R821_HUMAN;sp|P55884|EIF3B_HUMAN;tr|A4D210|A4D210_HUMAN;tr|B4DV79|B4DV79_HUMAN;tr|B4DXN6|B4DXN6_HUMAN;tr|Q96G38|Q96G38_HUMAN;tr|Q86UM1|Q86UM1_HUMAN;tr|C9JZG1|C9JZG1_HUMAN;tr|C9JQN7|C9JQN7_HUMAN;tr|Q59FS8|Q59FS8_HUMAN	tr|A0A024R821|A0A024R821_HUMAN;sp|P55884|EIF3B_HUMAN;tr|A4D210|A4D210_HUMAN;tr|B4DV79|B4DV79_HUMAN;tr|B4DXN6|B4DXN6_HUMAN;tr|Q96G38|Q96G38_HUMAN;tr|Q86UM1|Q86UM1_HUMAN	tr|A0A024R821|A0A024R821_HUMAN Eukaryotic translation initiation factor 3 subunit B OS=Homo sapiens OX=9606 GN=EIF3S9 PE=3 SV=1;sp|P55884|EIF3B_HUMAN Eukaryotic translation initiation factor 3 subunit B OS=Homo sapiens OX=9606 GN=EIF3B PE=1 SV=3;tr|A4D210|	516190000	526920000	553810000	543560000	573950000	520030000	537190000	591990000
tr|A0A024R830|A0A024R830_HUMAN;sp|P29218|IMPA1_HUMAN;tr|A0A140VJL8|A0A140VJL8_HUMAN;tr|H0YBL1|H0YBL1_HUMAN;tr|E5RIP7|E5RIP7_HUMAN;tr|E5RG13|E5RG13_HUMAN;tr|E5RG94|E5RG94_HUMAN;tr|E5RHE9|E5RHE9_HUMAN;tr|E5RI82|E5RI82_HUMAN;tr|E5RGY4|E5RGY4_HUMAN;sp|O55023|IMPA1_MOUSE;tr|E5RIF4|E5RIF4_HUMAN	tr|A0A024R830|A0A024R830_HUMAN;sp|P29218|IMPA1_HUMAN;tr|A0A140VJL8|A0A140VJL8_HUMAN;tr|H0YBL1|H0YBL1_HUMAN;tr|E5RIP7|E5RIP7_HUMAN;tr|E5RG13|E5RG13_HUMAN	tr|A0A024R830|A0A024R830_HUMAN Inositol-1-monophosphatase OS=Homo sapiens OX=9606 GN=IMPA1 PE=3 SV=1;sp|P29218|IMPA1_HUMAN Inositol monophosphatase 1 OS=Homo sapiens OX=9606 GN=IMPA1 PE=1 SV=1;tr|A0A140VJL8|A0A140VJL8_HUMAN Inositol-1-monophosphatase OS=Ho	50924000	46545000	42975000	43216000	41097000	38045000	33917000	45638000
tr|A0A024R845|A0A024R845_HUMAN;sp|P61106|RAB14_HUMAN;tr|X6RFL8|X6RFL8_HUMAN	tr|A0A024R845|A0A024R845_HUMAN;sp|P61106|RAB14_HUMAN;tr|X6RFL8|X6RFL8_HUMAN	tr|A0A024R845|A0A024R845_HUMAN RAB14, member RAS oncogene family, isoform CRA_a OS=Homo sapiens OX=9606 GN=RAB14 PE=4 SV=1;sp|P61106|RAB14_HUMAN Ras-related protein Rab-14 OS=Homo sapiens OX=9606 GN=RAB14 PE=1 SV=4;tr|X6RFL8|X6RFL8_HUMAN Ras-related protei	247860000	253020000	224540000	243890000	247750000	249340000	233830000	255190000
tr|A0A024R861|A0A024R861_HUMAN;sp|O00743|PPP6_HUMAN;tr|B7Z3E2|B7Z3E2_HUMAN;tr|Q5T1S7|Q5T1S7_HUMAN;tr|A0A0S2Z482|A0A0S2Z482_HUMAN	tr|A0A024R861|A0A024R861_HUMAN;sp|O00743|PPP6_HUMAN	tr|A0A024R861|A0A024R861_HUMAN Serine/threonine-protein phosphatase OS=Homo sapiens OX=9606 GN=PPP6C PE=2 SV=1;sp|O00743|PPP6_HUMAN Serine/threonine-protein phosphatase 6 catalytic subunit OS=Homo sapiens OX=9606 GN=PPP6C PE=1 SV=1	63821000	66377000	52554000	50063000	64201000	61154000	63747000	61281000
tr|A0A024R872|A0A024R872_HUMAN;sp|Q96TA1|NIBL1_HUMAN;tr|Q9H8K1|Q9H8K1_HUMAN;tr|Q2YD88|Q2YD88_HUMAN;tr|Q9H6L6|Q9H6L6_HUMAN	tr|A0A024R872|A0A024R872_HUMAN;sp|Q96TA1|NIBL1_HUMAN	tr|A0A024R872|A0A024R872_HUMAN Chromosome 9 open reading frame 88, isoform CRA_a OS=Homo sapiens OX=9606 GN=C9orf88 PE=4 SV=1;sp|Q96TA1|NIBL1_HUMAN Niban-like protein 1 OS=Homo sapiens OX=9606 GN=FAM129B PE=1 SV=3	463890000	437270000	414230000	467390000	510710000	505480000	479830000	507410000
tr|A0A024R883|A0A024R883_HUMAN;sp|O75348|VATG1_HUMAN	tr|A0A024R883|A0A024R883_HUMAN;sp|O75348|VATG1_HUMAN	tr|A0A024R883|A0A024R883_HUMAN V-type proton ATPase subunit G OS=Homo sapiens OX=9606 GN=ATP6V1G1 PE=3 SV=1;sp|O75348|VATG1_HUMAN V-type proton ATPase subunit G 1 OS=Homo sapiens OX=9606 GN=ATP6V1G1 PE=1 SV=3	25236000	23788000	22797000	24810000	24792000	19669000	23334000	24405000
tr|A0A024R896|A0A024R896_HUMAN;sp|Q9NR46|SHLB2_HUMAN;tr|B7ZC38|B7ZC38_HUMAN;tr|B7ZC39|B7ZC39_HUMAN;tr|F8WFB9|F8WFB9_HUMAN;tr|Q71RA6|Q71RA6_HUMAN;tr|G5E9J1|G5E9J1_HUMAN;tr|H7C1Z6|H7C1Z6_HUMAN	tr|A0A024R896|A0A024R896_HUMAN;sp|Q9NR46|SHLB2_HUMAN;tr|B7ZC38|B7ZC38_HUMAN;tr|B7ZC39|B7ZC39_HUMAN;tr|F8WFB9|F8WFB9_HUMAN	tr|A0A024R896|A0A024R896_HUMAN SH3-domain GRB2-like endophilin B2, isoform CRA_a OS=Homo sapiens OX=9606 GN=SH3GLB2 PE=4 SV=1;sp|Q9NR46|SHLB2_HUMAN Endophilin-B2 OS=Homo sapiens OX=9606 GN=SH3GLB2 PE=1 SV=1;tr|B7ZC38|B7ZC38_HUMAN Endophilin-B2 OS=Homo sapi	25663000	25642000	27329000	24215000	31979000	31714000	31558000	30387000
tr|A0A024R8A7|A0A024R8A7_HUMAN;sp|Q96I24|FUBP3_HUMAN	tr|A0A024R8A7|A0A024R8A7_HUMAN;sp|Q96I24|FUBP3_HUMAN	tr|A0A024R8A7|A0A024R8A7_HUMAN HCG31253, isoform CRA_a OS=Homo sapiens OX=9606 GN=hCG_31253 PE=4 SV=1;sp|Q96I24|FUBP3_HUMAN Far upstream element-binding protein 3 OS=Homo sapiens OX=9606 GN=FUBP3 PE=1 SV=2	110160000	80053000	107380000	66901000	69658000	78145000	83348000	90415000
tr|A0A024R8E4|A0A024R8E4_HUMAN;sp|Q9BV86|NTM1A_HUMAN;tr|S4R344|S4R344_HUMAN;tr|S4R3J7|S4R3J7_HUMAN;tr|S4R338|S4R338_HUMAN	tr|A0A024R8E4|A0A024R8E4_HUMAN;sp|Q9BV86|NTM1A_HUMAN	tr|A0A024R8E4|A0A024R8E4_HUMAN Chromosome 9 open reading frame 32, isoform CRA_a OS=Homo sapiens OX=9606 GN=C9orf32 PE=4 SV=1;sp|Q9BV86|NTM1A_HUMAN N-terminal Xaa-Pro-Lys N-methyltransferase 1 OS=Homo sapiens OX=9606 GN=NTMT1 PE=1 SV=3	25999000	26348000	27933000	21304000	33956000	31861000	29355000	31941000
tr|A0A024R8P8|A0A024R8P8_HUMAN;sp|P63173|RL38_HUMAN;tr|J3KT73|J3KT73_HUMAN;tr|J3QL01|J3QL01_HUMAN;tr|J3KSP2|J3KSP2_HUMAN	tr|A0A024R8P8|A0A024R8P8_HUMAN;sp|P63173|RL38_HUMAN;tr|J3KT73|J3KT73_HUMAN;tr|J3QL01|J3QL01_HUMAN	tr|A0A024R8P8|A0A024R8P8_HUMAN Ribosomal protein L38, isoform CRA_a OS=Homo sapiens OX=9606 GN=RPL38 PE=3 SV=1;sp|P63173|RL38_HUMAN 60S ribosomal protein L38 OS=Homo sapiens OX=9606 GN=RPL38 PE=1 SV=2;tr|J3KT73|J3KT73_HUMAN 60S ribosomal protein L38 OS=Hom	112200000	156800000	125740000	139690000	143370000	160100000	164670000	145060000
tr|A0A024R8R4|A0A024R8R4_HUMAN;sp|Q8TAT6|NPL4_HUMAN;tr|B4DG89|B4DG89_HUMAN;tr|A0A0D9SFI9|A0A0D9SFI9_HUMAN;tr|I3L4U9|I3L4U9_HUMAN;tr|I3L283|I3L283_HUMAN;tr|I3L3I1|I3L3I1_HUMAN	tr|A0A024R8R4|A0A024R8R4_HUMAN;sp|Q8TAT6|NPL4_HUMAN;tr|B4DG89|B4DG89_HUMAN	tr|A0A024R8R4|A0A024R8R4_HUMAN Nuclear protein localization 4 homolog (S. cerevisiae), isoform CRA_a OS=Homo sapiens OX=9606 GN=NPLOC4 PE=4 SV=1;sp|Q8TAT6|NPL4_HUMAN Nuclear protein localization protein 4 homolog OS=Homo sapiens OX=9606 GN=NPLOC4 PE=1 SV=3	91724000	78207000	84975000	91336000	82216000	90273000	88989000	89875000
tr|A0A024R8S3|A0A024R8S3_HUMAN;sp|P61956|SUMO2_HUMAN;sp|Q6EEV6|SUMO4_HUMAN;sp|P55854|SUMO3_HUMAN;tr|A8MUA9|A8MUA9_HUMAN;tr|A8MU27|A8MU27_HUMAN	tr|A0A024R8S3|A0A024R8S3_HUMAN;sp|P61956|SUMO2_HUMAN	tr|A0A024R8S3|A0A024R8S3_HUMAN Small ubiquitin-related modifier OS=Homo sapiens OX=9606 GN=SUMO2 PE=3 SV=1;sp|P61956|SUMO2_HUMAN Small ubiquitin-related modifier 2 OS=Homo sapiens OX=9606 GN=SUMO2 PE=1 SV=3	204750000	199160000	270580000	285360000	276560000	260690000	248450000	275300000
tr|A0A024R8S5|A0A024R8S5_HUMAN;sp|P07237|PDIA1_HUMAN;tr|B4DNL5|B4DNL5_HUMAN;tr|B4DUA5|B4DUA5_HUMAN;tr|H7BZ94|H7BZ94_HUMAN;tr|B4DLN6|B4DLN6_HUMAN;tr|H0Y3Z3|H0Y3Z3_HUMAN;tr|Q96C96|Q96C96_HUMAN;tr|B3KTQ9|B3KTQ9_HUMAN;tr|B4DJS0|B4DJS0_HUMAN;tr|I3L398|I3L398_HUMAN;tr|I3L312|I3L312_HUMAN;tr|I3NI03|I3NI03_HUMAN;tr|I3L4M2|I3L4M2_HUMAN;tr|I3L0S0|I3L0S0_HUMAN;tr|I3L3U6|I3L3U6_HUMAN;tr|I3L3P5|I3L3P5_HUMAN;t…	tr|A0A024R8S5|A0A024R8S5_HUMAN;sp|P07237|PDIA1_HUMAN;tr|B4DNL5|B4DNL5_HUMAN;tr|B4DUA5|B4DUA5_HUMAN;tr|H7BZ94|H7BZ94_HUMAN;tr|B4DLN6|B4DLN6_HUMAN;tr|H0Y3Z3|H0Y3Z3_HUMAN;tr|Q96C96|Q96C96_HUMAN	tr|A0A024R8S5|A0A024R8S5_HUMAN Protein disulfide-isomerase OS=Homo sapiens OX=9606 GN=P4HB PE=2 SV=1;sp|P07237|PDIA1_HUMAN Protein disulfide-isomerase OS=Homo sapiens OX=9606 GN=P4HB PE=1 SV=3;tr|B4DNL5|B4DNL5_HUMAN Protein disulfide-isomerase OS=Homo sapi	2800000000	2640100000	2593900000	2722000000	2222400000	2193200000	2119800000	2256200000
tr|A0A024R8T9|A0A024R8T9_HUMAN;sp|O43760|SNG2_HUMAN;tr|K7ELS8|K7ELS8_HUMAN;tr|K7EJ35|K7EJ35_HUMAN;tr|K7ELD9|K7ELD9_HUMAN;tr|K7ENG9|K7ENG9_HUMAN	tr|A0A024R8T9|A0A024R8T9_HUMAN;sp|O43760|SNG2_HUMAN;tr|K7ELS8|K7ELS8_HUMAN;tr|K7EJ35|K7EJ35_HUMAN	tr|A0A024R8T9|A0A024R8T9_HUMAN Synaptogyrin OS=Homo sapiens OX=9606 GN=SYNGR2 PE=3 SV=1;sp|O43760|SNG2_HUMAN Synaptogyrin-2 OS=Homo sapiens OX=9606 GN=SYNGR2 PE=1 SV=1;tr|K7ELS8|K7ELS8_HUMAN Synaptogyrin-2 (Fragment) OS=Homo sapiens OX=9606 GN=SYNGR2 PE=1	44216000	36124000	57383000	45092000	32318000	33721000	47629000	29137000
tr|A0A024R8U1|A0A024R8U1_HUMAN;sp|O15427|MOT4_HUMAN;tr|Q53G91|Q53G91_HUMAN;tr|J3QSC3|J3QSC3_HUMAN;tr|J3QQS9|J3QQS9_HUMAN;tr|J3QQV2|J3QQV2_HUMAN;tr|J3KT83|J3KT83_HUMAN;tr|J3QRA0|J3QRA0_HUMAN;tr|J3KTI8|J3KTI8_HUMAN;tr|J3QLE3|J3QLE3_HUMAN;tr|J3KTM6|J3KTM6_HUMAN;tr|J3QRU2|J3QRU2_HUMAN;tr|J3QRP8|J3QRP8_HUMAN	tr|A0A024R8U1|A0A024R8U1_HUMAN;sp|O15427|MOT4_HUMAN;tr|Q53G91|Q53G91_HUMAN;tr|J3QSC3|J3QSC3_HUMAN;tr|J3QQS9|J3QQS9_HUMAN;tr|J3QQV2|J3QQV2_HUMAN	tr|A0A024R8U1|A0A024R8U1_HUMAN Solute carrier family 16 (Monocarboxylic acid transporters), member 3, isoform CRA_a OS=Homo sapiens OX=9606 GN=SLC16A3 PE=4 SV=1;sp|O15427|MOT4_HUMAN Monocarboxylate transporter 4 OS=Homo sapiens OX=9606 GN=SLC16A3 PE=1 SV=1	176400000	201190000	206330000	217460000	151390000	151650000	170720000	180330000
tr|A0A024R8W0|A0A024R8W0_HUMAN;sp|P38919|IF4A3_HUMAN;tr|I3L3H2|I3L3H2_HUMAN;tr|Q59GT8|Q59GT8_HUMAN;tr|F8WE11|F8WE11_HUMAN	tr|A0A024R8W0|A0A024R8W0_HUMAN;sp|P38919|IF4A3_HUMAN	tr|A0A024R8W0|A0A024R8W0_HUMAN DEAD (Asp-Glu-Ala-Asp) box polypeptide 48, isoform CRA_a OS=Homo sapiens OX=9606 GN=DDX48 PE=3 SV=1;sp|P38919|IF4A3_HUMAN Eukaryotic initiation factor 4A-III OS=Homo sapiens OX=9606 GN=EIF4A3 PE=1 SV=4	352000000	340810000	353160000	410090000	333760000	352390000	382580000	390110000
tr|A0A024R904|A0A024R904_HUMAN;sp|Q9HB71|CYBP_HUMAN;tr|Q6NVY0|Q6NVY0_HUMAN;tr|B4DFD3|B4DFD3_HUMAN;tr|B2ZWH1|B2ZWH1_HUMAN	tr|A0A024R904|A0A024R904_HUMAN;sp|Q9HB71|CYBP_HUMAN;tr|Q6NVY0|Q6NVY0_HUMAN	tr|A0A024R904|A0A024R904_HUMAN Calcyclin binding protein, isoform CRA_a OS=Homo sapiens OX=9606 GN=CACYBP PE=4 SV=1;sp|Q9HB71|CYBP_HUMAN Calcyclin-binding protein OS=Homo sapiens OX=9606 GN=CACYBP PE=1 SV=2;tr|Q6NVY0|Q6NVY0_HUMAN Calcyclin binding protein	923000000	892290000	863120000	868170000	1043700000	1066400000	942030000	1017200000
tr|A0A024R978|A0A024R978_HUMAN;sp|Q9BZQ8|NIBAN_HUMAN;tr|H0Y7M9|H0Y7M9_HUMAN	tr|A0A024R978|A0A024R978_HUMAN;sp|Q9BZQ8|NIBAN_HUMAN	tr|A0A024R978|A0A024R978_HUMAN Chromosome 1 open reading frame 24, isoform CRA_a OS=Homo sapiens OX=9606 GN=C1orf24 PE=4 SV=1;sp|Q9BZQ8|NIBAN_HUMAN Protein Niban OS=Homo sapiens OX=9606 GN=FAM129A PE=1 SV=1	28866000	31060000	29754000	29338000	44401000	41650000	41117000	45221000
tr|A0A024R994|A0A024R994_HUMAN;sp|O75131|CPNE3_HUMAN;tr|Q05DL8|Q05DL8_HUMAN;tr|A0A087WYQ3|A0A087WYQ3_HUMAN;tr|H0YB26|H0YB26_HUMAN;tr|A0A087WXR6|A0A087WXR6_HUMAN;tr|E5RHZ0|E5RHZ0_HUMAN;tr|A0A087WUS8|A0A087WUS8_HUMAN;tr|E5RFT7|E5RFT7_HUMAN;tr|B3KWK1|B3KWK1_HUMAN;tr|B2RD40|B2RD40_HUMAN;tr|A8K8A4|A8K8A4_HUMAN;sp|Q96FN4|CPNE2_HUMAN;tr|E7ENV7|E7ENV7_HUMAN;sp|Q8IYJ1|CPNE9_HUMAN;sp|O95741|CPNE6_HUMAN;sp|…	tr|A0A024R994|A0A024R994_HUMAN;sp|O75131|CPNE3_HUMAN;tr|Q05DL8|Q05DL8_HUMAN;tr|A0A087WYQ3|A0A087WYQ3_HUMAN	tr|A0A024R994|A0A024R994_HUMAN Copine III, isoform CRA_a OS=Homo sapiens OX=9606 GN=CPNE3 PE=4 SV=1;sp|O75131|CPNE3_HUMAN Copine-3 OS=Homo sapiens OX=9606 GN=CPNE3 PE=1 SV=1;tr|Q05DL8|Q05DL8_HUMAN CPNE3 protein (Fragment) OS=Homo sapiens OX=9606 GN=CPNE3 P	179660000	180430000	177770000	158390000	158960000	177490000	163640000	170660000
tr|A0A024R9C1|A0A024R9C1_HUMAN;sp|P11940|PABP1_HUMAN;tr|E7EQV3|E7EQV3_HUMAN;tr|B4DZW4|B4DZW4_HUMAN;tr|E7ERJ7|E7ERJ7_HUMAN;tr|B4DQX0|B4DQX0_HUMAN;tr|A0A087WTT1|A0A087WTT1_HUMAN;tr|B3KT93|B3KT93_HUMAN;tr|A0A024R9E2|A0A024R9E2_HUMAN;tr|H0YAR2|H0YAR2_HUMAN;tr|Q5VX58|Q5VX58_HUMAN;tr|Q3ZCS4|Q3ZCS4_HUMAN;sp|Q9H361|PABP3_HUMAN;tr|Q2VIP3|Q2VIP3_HUMAN;tr|H0YBN4|H0YBN4_HUMAN;tr|H0YAP2|H0YAP2_HUMAN;tr|H0YAS6…	tr|A0A024R9C1|A0A024R9C1_HUMAN;sp|P11940|PABP1_HUMAN;tr|E7EQV3|E7EQV3_HUMAN;tr|B4DZW4|B4DZW4_HUMAN;tr|E7ERJ7|E7ERJ7_HUMAN;tr|B4DQX0|B4DQX0_HUMAN;tr|A0A087WTT1|A0A087WTT1_HUMAN;tr|B3KT93|B3KT93_HUMAN;tr|A0A024R9E2|A0A024R9E2_HUMAN	tr|A0A024R9C1|A0A024R9C1_HUMAN Polyadenylate-binding protein OS=Homo sapiens OX=9606 GN=PABPC1 PE=3 SV=1;sp|P11940|PABP1_HUMAN Polyadenylate-binding protein 1 OS=Homo sapiens OX=9606 GN=PABPC1 PE=1 SV=2;tr|E7EQV3|E7EQV3_HUMAN Polyadenylate-binding protein	1003300000	996480000	888910000	933840000	1138400000	1112500000	1093000000	1106000000
tr|A0A024R9D2|A0A024R9D2_HUMAN;sp|Q86UE4|LYRIC_HUMAN;tr|E5RJU9|E5RJU9_HUMAN;tr|H0YB56|H0YB56_HUMAN;tr|H0YBJ8|H0YBJ8_HUMAN	tr|A0A024R9D2|A0A024R9D2_HUMAN;sp|Q86UE4|LYRIC_HUMAN;tr|E5RJU9|E5RJU9_HUMAN	tr|A0A024R9D2|A0A024R9D2_HUMAN Metadherin, isoform CRA_a OS=Homo sapiens OX=9606 GN=MTDH PE=4 SV=1;sp|Q86UE4|LYRIC_HUMAN Protein LYRIC OS=Homo sapiens OX=9606 GN=MTDH PE=1 SV=2;tr|E5RJU9|E5RJU9_HUMAN Protein LYRIC OS=Homo sapiens OX=9606 GN=MTDH PE=1 SV=1	112600000	106130000	112230000	108110000	104880000	103030000	99724000	96557000
tr|A0A024R9D7|A0A024R9D7_HUMAN;sp|Q16698|DECR_HUMAN;tr|E5RJD2|E5RJD2_HUMAN;tr|E5RJG7|E5RJG7_HUMAN;tr|Q7LDK6|Q7LDK6_HUMAN;tr|E5RFV2|E5RFV2_HUMAN;tr|E5RID6|E5RID6_HUMAN	tr|A0A024R9D7|A0A024R9D7_HUMAN;sp|Q16698|DECR_HUMAN;tr|E5RJD2|E5RJD2_HUMAN;tr|E5RJG7|E5RJG7_HUMAN;tr|Q7LDK6|Q7LDK6_HUMAN;tr|E5RFV2|E5RFV2_HUMAN	tr|A0A024R9D7|A0A024R9D7_HUMAN 2,4-dienoyl CoA reductase 1, mitochondrial, isoform CRA_b OS=Homo sapiens OX=9606 GN=DECR1 PE=4 SV=1;sp|Q16698|DECR_HUMAN 2,4-dienoyl-CoA reductase, mitochondrial OS=Homo sapiens OX=9606 GN=DECR1 PE=1 SV=1;tr|E5RJD2|E5RJD2_HU	41279000	40498000	36288000	38723000	38908000	41098000	38458000	38360000
tr|A0A024R9G4|A0A024R9G4_HUMAN;sp|Q9NUQ9|FA49B_HUMAN;tr|Q68D08|Q68D08_HUMAN;tr|E5RI16|E5RI16_HUMAN;tr|E5RGI7|E5RGI7_HUMAN;tr|E5RJE1|E5RJE1_HUMAN;tr|E5RIR8|E5RIR8_HUMAN;tr|E5RJL8|E5RJL8_HUMAN;tr|E5RK61|E5RK61_HUMAN;tr|E5RFS4|E5RFS4_HUMAN;tr|E5RHU5|E5RHU5_HUMAN;tr|A0A1W2PRQ0|A0A1W2PRQ0_HUMAN;tr|E5RK81|E5RK81_HUMAN;tr|E5RH75|E5RH75_HUMAN;tr|A0A087X178|A0A087X178_HUMAN;tr|Q3ZTR9|Q3ZTR9_HUMAN;tr|B3KRB…	tr|A0A024R9G4|A0A024R9G4_HUMAN;sp|Q9NUQ9|FA49B_HUMAN;tr|Q68D08|Q68D08_HUMAN;tr|E5RI16|E5RI16_HUMAN	tr|A0A024R9G4|A0A024R9G4_HUMAN Family with sequence similarity 49, member B, isoform CRA_a OS=Homo sapiens OX=9606 GN=FAM49B PE=4 SV=1;sp|Q9NUQ9|FA49B_HUMAN Protein FAM49B OS=Homo sapiens OX=9606 GN=FAM49B PE=1 SV=1;tr|Q68D08|Q68D08_HUMAN Uncharacterized p	142630000	153430000	153420000	155290000	147030000	142900000	136550000	142280000
tr|A0A024R9I0|A0A024R9I0_HUMAN;sp|P21283|VATC1_HUMAN;tr|E7EV59|E7EV59_HUMAN;tr|B7Z593|B7Z593_HUMAN;tr|A8KA87|A8KA87_HUMAN;sp|Q8NEY4|VATC2_HUMAN;tr|A0A0U1RR16|A0A0U1RR16_HUMAN	tr|A0A024R9I0|A0A024R9I0_HUMAN;sp|P21283|VATC1_HUMAN;tr|E7EV59|E7EV59_HUMAN	tr|A0A024R9I0|A0A024R9I0_HUMAN V-type proton ATPase subunit C OS=Homo sapiens OX=9606 GN=ATP6V1C1 PE=2 SV=1;sp|P21283|VATC1_HUMAN V-type proton ATPase subunit C 1 OS=Homo sapiens OX=9606 GN=ATP6V1C1 PE=1 SV=4;tr|E7EV59|E7EV59_HUMAN V-type proton ATPase sub	22016000	22120000	26805000	21995000	19196000	21568000	24843000	19943000
tr|A0A024R9J0|A0A024R9J0_HUMAN;sp|O60216|RAD21_HUMAN;tr|E5RI01|E5RI01_HUMAN;tr|E5RFZ5|E5RFZ5_HUMAN;tr|E5RFV8|E5RFV8_HUMAN;tr|E5RIN7|E5RIN7_HUMAN;tr|E5RJW1|E5RJW1_HUMAN;tr|E5RJK5|E5RJK5_HUMAN;tr|B3KUT8|B3KUT8_HUMAN	tr|A0A024R9J0|A0A024R9J0_HUMAN;sp|O60216|RAD21_HUMAN	tr|A0A024R9J0|A0A024R9J0_HUMAN RAD21 homolog (S. pombe), isoform CRA_a OS=Homo sapiens OX=9606 GN=RAD21 PE=4 SV=1;sp|O60216|RAD21_HUMAN Double-strand-break repair protein rad21 homolog OS=Homo sapiens OX=9606 GN=RAD21 PE=1 SV=2	28306000	28827000	34599000	30852000	31262000	34119000	33646000	37475000
tr|A0A024R9U3|A0A024R9U3_HUMAN;sp|Q9NX40|OCAD1_HUMAN;tr|D6RDK6|D6RDK6_HUMAN;tr|D6RBN5|D6RBN5_HUMAN;tr|D6RG39|D6RG39_HUMAN;tr|D6RIT9|D6RIT9_HUMAN;tr|D6R918|D6R918_HUMAN;tr|D6RBC5|D6RBC5_HUMAN;tr|D6RDI5|D6RDI5_HUMAN;tr|D6RI08|D6RI08_HUMAN;tr|D6RA54|D6RA54_HUMAN;tr|D6RC55|D6RC55_HUMAN;tr|D6RDK1|D6RDK1_HUMAN;tr|B4DND1|B4DND1_HUMAN;tr|D6RIV2|D6RIV2_HUMAN;tr|D6R9T5|D6R9T5_HUMAN	tr|A0A024R9U3|A0A024R9U3_HUMAN;sp|Q9NX40|OCAD1_HUMAN;tr|D6RDK6|D6RDK6_HUMAN;tr|D6RBN5|D6RBN5_HUMAN;tr|D6RG39|D6RG39_HUMAN;tr|D6RIT9|D6RIT9_HUMAN	tr|A0A024R9U3|A0A024R9U3_HUMAN OCIA domain containing 1, isoform CRA_a OS=Homo sapiens OX=9606 GN=OCIAD1 PE=4 SV=1;sp|Q9NX40|OCAD1_HUMAN OCIA domain-containing protein 1 OS=Homo sapiens OX=9606 GN=OCIAD1 PE=1 SV=1;tr|D6RDK6|D6RDK6_HUMAN OCIA domain-contain	16101000	16844000	15130000	16665000	16838000	17430000	19871000	17249000
tr|A0A024R9U8|A0A024R9U8_HUMAN;tr|A0A024R9W5|A0A024R9W5_HUMAN;sp|Q7Z6Z7|HUWE1_HUMAN;tr|A0A024R9Y3|A0A024R9Y3_HUMAN;tr|Q5H962|Q5H962_HUMAN;tr|B4DGF6|B4DGF6_HUMAN;tr|Q5H935|Q5H935_HUMAN;tr|H0Y659|H0Y659_HUMAN;tr|A0A087X146|A0A087X146_HUMAN;tr|Q53FW4|Q53FW4_HUMAN;tr|A0A1B0GXC7|A0A1B0GXC7_HUMAN;tr|Q5H963|Q5H963_HUMAN;tr|Q8IWJ0|Q8IWJ0_HUMAN;tr|Q3B7K0|Q3B7K0_HUMAN	tr|A0A024R9U8|A0A024R9U8_HUMAN;tr|A0A024R9W5|A0A024R9W5_HUMAN;sp|Q7Z6Z7|HUWE1_HUMAN;tr|A0A024R9Y3|A0A024R9Y3_HUMAN	tr|A0A024R9U8|A0A024R9U8_HUMAN HECT, UBA and WWE domain containing 1, isoform CRA_c OS=Homo sapiens OX=9606 GN=HUWE1 PE=4 SV=1;tr|A0A024R9W5|A0A024R9W5_HUMAN HECT, UBA and WWE domain containing 1, isoform CRA_b OS=Homo sapiens OX=9606 GN=HUWE1 PE=4 SV=1;sp	264010000	261050000	283450000	254510000	246570000	234900000	232510000	229710000
tr|A0A024RAC0|A0A024RAC0_HUMAN;sp|Q86V48|LUZP1_HUMAN	tr|A0A024RAC0|A0A024RAC0_HUMAN;sp|Q86V48|LUZP1_HUMAN	tr|A0A024RAC0|A0A024RAC0_HUMAN Leucine zipper protein 1, isoform CRA_a OS=Homo sapiens OX=9606 GN=LUZP1 PE=4 SV=1;sp|Q86V48|LUZP1_HUMAN Leucine zipper protein 1 OS=Homo sapiens OX=9606 GN=LUZP1 PE=1 SV=2	14170000	11503000	13983000	14394000	15002000	12017000	11040000	11286000
tr|A0A024RAE4|A0A024RAE4_HUMAN;sp|P60953|CDC42_HUMAN;tr|B4E1U9|B4E1U9_HUMAN;tr|A0A024RAE6|A0A024RAE6_HUMAN;tr|A0A024R9T1|A0A024R9T1_HUMAN;tr|Q5JYX0|Q5JYX0_HUMAN;tr|Q9UJM1|Q9UJM1_HUMAN;tr|B7ZAY4|B7ZAY4_HUMAN;tr|B4DMH5|B4DMH5_HUMAN;tr|Q9UJM0|Q9UJM0_HUMAN;tr|F8WET9|F8WET9_HUMAN;tr|B1AH79|B1AH79_HUMAN;tr|G3V4H1|G3V4H1_HUMAN;tr|G3V476|G3V476_HUMAN;tr|V9HWD0|V9HWD0_HUMAN;sp|P17081|RHOQ_HUMAN;tr|Q7Z513|…	tr|A0A024RAE4|A0A024RAE4_HUMAN;sp|P60953|CDC42_HUMAN;tr|B4E1U9|B4E1U9_HUMAN;tr|A0A024RAE6|A0A024RAE6_HUMAN;tr|A0A024R9T1|A0A024R9T1_HUMAN;tr|Q5JYX0|Q5JYX0_HUMAN;tr|Q9UJM1|Q9UJM1_HUMAN;tr|B7ZAY4|B7ZAY4_HUMAN;tr|B4DMH5|B4DMH5_HUMAN;tr|Q9UJM0|Q9UJM0_HUMAN	tr|A0A024RAE4|A0A024RAE4_HUMAN Cell division cycle 42 (GTP binding protein, 25kDa), isoform CRA_a OS=Homo sapiens OX=9606 GN=CDC42 PE=4 SV=1;sp|P60953|CDC42_HUMAN Cell division control protein 42 homolog OS=Homo sapiens OX=9606 GN=CDC42 PE=1 SV=2;tr|B4E1U9	227080000	217520000	199570000	187920000	216890000	200120000	193040000	214050000
tr|A0A024RAI1|A0A024RAI1_HUMAN;sp|P61158|ARP3_HUMAN;tr|B4DXW1|B4DXW1_HUMAN;tr|Q59FV6|Q59FV6_HUMAN;tr|B4DTI0|B4DTI0_HUMAN;tr|B4DT29|B4DT29_HUMAN;tr|B4E1U3|B4E1U3_HUMAN;tr|Q59GD5|Q59GD5_HUMAN;tr|B7Z9W3|B7Z9W3_HUMAN;sp|Q9P1U1|ARP3B_HUMAN;tr|F8WDR7|F8WDR7_HUMAN;tr|F8WEW2|F8WEW2_HUMAN;tr|F8WE84|F8WE84_HUMAN;tr|B3KM55|B3KM55_HUMAN;tr|A0A0A0MTI9|A0A0A0MTI9_HUMAN;tr|H7C4J1|H7C4J1_HUMAN;sp|Q9C0K3|ARP3C_HU…	tr|A0A024RAI1|A0A024RAI1_HUMAN;sp|P61158|ARP3_HUMAN;tr|B4DXW1|B4DXW1_HUMAN;tr|Q59FV6|Q59FV6_HUMAN;tr|B4DTI0|B4DTI0_HUMAN;tr|B4DT29|B4DT29_HUMAN	tr|A0A024RAI1|A0A024RAI1_HUMAN ARP3 actin-related protein 3 homolog (Yeast), isoform CRA_a OS=Homo sapiens OX=9606 GN=ACTR3 PE=3 SV=1;sp|P61158|ARP3_HUMAN Actin-related protein 3 OS=Homo sapiens OX=9606 GN=ACTR3 PE=1 SV=3;tr|B4DXW1|B4DXW1_HUMAN Actin-relat	748710000	710100000	739270000	701960000	763530000	784880000	792190000	794550000
tr|A0A024RAJ6|A0A024RAJ6_HUMAN;sp|P07686|HEXB_HUMAN;tr|Q5URX0|Q5URX0_HUMAN;tr|H0Y9B6|H0Y9B6_HUMAN;tr|H0YA83|H0YA83_HUMAN;tr|D6REQ8|D6REQ8_HUMAN	tr|A0A024RAJ6|A0A024RAJ6_HUMAN;sp|P07686|HEXB_HUMAN;tr|Q5URX0|Q5URX0_HUMAN;tr|H0Y9B6|H0Y9B6_HUMAN;tr|H0YA83|H0YA83_HUMAN	tr|A0A024RAJ6|A0A024RAJ6_HUMAN Beta-hexosaminidase OS=Homo sapiens OX=9606 GN=HEXB PE=3 SV=1;sp|P07686|HEXB_HUMAN Beta-hexosaminidase subunit beta OS=Homo sapiens OX=9606 GN=HEXB PE=1 SV=3;tr|Q5URX0|Q5URX0_HUMAN Beta-hexosaminidase subunit beta OS=Homo sap	105410000	95929000	104390000	104060000	105270000	108130000	101450000	100420000
tr|A0A024RAM0|A0A024RAM0_HUMAN;sp|Q92973|TNPO1_HUMAN;tr|B4DSC0|B4DSC0_HUMAN;tr|E7EW37|E7EW37_HUMAN;tr|S4R398|S4R398_HUMAN	tr|A0A024RAM0|A0A024RAM0_HUMAN;sp|Q92973|TNPO1_HUMAN	tr|A0A024RAM0|A0A024RAM0_HUMAN Transportin 1, isoform CRA_a OS=Homo sapiens OX=9606 GN=TNPO1 PE=4 SV=1;sp|Q92973|TNPO1_HUMAN Transportin-1 OS=Homo sapiens OX=9606 GN=TNPO1 PE=1 SV=2	316650000	328660000	316680000	286310000	340830000	343160000	354250000	319000000
[truncated: 2,523 more rows]

## Sheet: Expressed proteins
UniProt	Protein IDs	Majority protein IDs	Fasta headers	Ctrl MDA231	Ctrl MDA231	Ctrl MDA231	Ctrl MDA231	NEDD8 KO MDA231	NEDD8 KO MDA231	NEDD8 KO MDA231	NEDD8 KO MDA231
[truncated: 1,977 more rows]

[truncated: 3 more sheets: Differentially expressed, Unique proteins, Short interactions (STRING)]
