# Supplementary material for: Loss of NEDD8 in cancer cells causes vulnerability to immune checkpoint blockade in triple-negative breast cancer
Source: Nat Commun. 2024 Apr 27;15:3581. doi: 10.1038/s41467-024-47987-x (PMC11055868; doi:10.1038/s41467-024-47987-x)
Supplement: Supplementary file 6 — Supplementary Data 3 [file 41467_2024_47987_MOESM6_ESM.xlsx]

## Sheet: Sheet1
		Group:	Ctrl+IgG	Ctrl+IgG	Ctrl+IgG	Ctrl+IgG	Ctrl+IgG	Ctrl+IgG	N8 KO+IgG	N8 KO+IgG	N8 KO+IgG	N8 KO+IgG	N8 KO+IgG	Ctrl+aPD1	Ctrl+aPD1	Ctrl+aPD1	Ctrl+aPD1	N8 KO+aPD1	N8 KO+aPD1	N8 KO+aPD1	N8 KO+aPD1	N8 KO+aPD1	N8 KO+aPD1
4930578C19Rik	Endogenous	mRNA	8.58	15.52	24.97	10.6	9.96	17.64	20.17	16.08	8.67	15.36	23.39	15.31	7.51	10.65	16.62	17.25	5.45	10.79	20.35	11.79	10.62
A2m	Endogenous	mRNA	19.3	18.25	29.13	11.41	28.06	17.64	21.29	15.07	26.02	20.48	31.18	18.59	28.77	13.55	19.25	20.7	19.08	17.66	20.35	13.75	20.17
Acvr1c	Endogenous	mRNA	10.01	12.78	11.1	10.6	11.77	9.7	7.84	10.05	14.87	15.36	18.71	10.94	12.51	11.62	5.25	18.4	10.9	10.79	11.97	8.84	13.8
Adam12	Endogenous	mRNA	20.01	20.99	22.19	12.23	12.67	14.99	19.05	14.07	12.39	28.67	10.91	13.12	15.01	7.75	15.75	10.35	23.17	5.89	19.15	15.72	22.3
Adgre1	Endogenous	mRNA	152.23	661.7	518.74	835.67	657.96	383.58	352.98	430.1	263.93	235.47	202.69	276.71	545.39	572.21	1764	423.3	327.13	300.17	572.1	446.04	381.17
Adm	Endogenous	mRNA	1960.41	1787.04	1807.28	1436.54	1867.07	2295.31	1350.28	1284.26	2279.94	2289.14	1166.23	1944.65	2055.2	2934.65	1406.12	1633.37	2006.4	1202.62	2229.76	1844.09	1258.18
Adora2a	Endogenous	mRNA	40.74	59.32	74.9	75.01	64.26	28.22	45.94	68.33	79.3	60.4	56.13	22.97	46.28	51.32	45.5	109.27	40.89	79.46	84.98	35.37	75.38
Akt1	Endogenous	mRNA	824.76	937.33	836.37	941.66	878.78	920.59	970.41	927.52	936.76	941.87	804.51	995.29	1092.02	985.64	843.5	922.51	1052.27	1109.43	907.22	904.85	1039.46
Aldoa	Endogenous	mRNA	17715.1	19978.7	20089.6	21139.6	19709.7	21420.5	20967.9	19751.3	22671.8	17383.6	19883.6	20344.4	23081.3	24964.3	19754.8	20223.9	19611.5	22098.4	24519	21779.3	18157
Aldoc	Endogenous	mRNA	57.18	58.41	69.35	52.99	61.54	49.38	91.89	81.4	123.91	94.19	90.43	63.44	57.54	60.03	46.37	93.17	119.95	71.61	74.21	109.05	95.56
Angpt1	Endogenous	mRNA	23.58	31.03	36.06	26.09	26.25	19.4	36.98	29.14	34.69	29.69	37.42	26.25	30.02	28.08	26.25	31.06	39.53	29.43	29.92	17.68	29.73
Angpt2	Endogenous	mRNA	50.74	92.18	98.48	90.5	88.69	80.24	105.33	106.52	53.28	77.81	87.31	52.5	86.31	69.71	100.62	111.58	100.87	128.5	117.29	86.46	127.41
Angptl4	Endogenous	mRNA	1247.86	2348.34	2216.46	2386.35	1759.38	1327.98	1391.74	1869.11	1522.85	1226.47	1643.32	857.48	2081.47	3228.98	4487.86	2845.74	1936.88	2803.5	2344.66	2317.64	1675.45
Anln	Endogenous	mRNA	1217.84	1271.37	1006.98	1069.66	1103.23	1114.59	666.73	767.74	804.18	776.02	762.41	1063.1	1344.7	1718.57	1135.75	959.32	962.31	962.29	1049.65	938.25	940.71
Apc	Endogenous	mRNA	32.16	26.47	22.19	26.09	20.82	23.81	25.77	24.12	30.98	25.59	42.1	12.03	32.52	30.98	42	43.71	35.44	31.39	45.48	44.21	41.41
Aph1b	Endogenous	mRNA	30.73	26.47	22.19	33.43	27.15	23.81	42.58	25.12	24.78	26.62	32.74	27.34	26.27	28.08	35	37.96	31.35	22.56	28.72	23.58	36.1
Api5	Endogenous	mRNA	1997.57	2573.77	2142.94	2415.7	2349.45	2075.74	2376.71	2353.47	2153.56	1858.14	2254.5	2286.98	2490.51	2558.98	2371.24	2548.98	2524.36	2691.68	2658.24	2693.92	2524.85
Aplnr	Endogenous	mRNA	17.87	26.47	45.77	20.38	15.39	25.57	26.89	27.13	27.26	33.78	32.74	21.87	30.02	22.27	32.37	34.51	36.8	20.6	20.35	20.63	23.36
Apoe	Endogenous	mRNA	1844.63	4542.43	4707.54	6586.71	6387.69	3694.71	2709.51	2914.2	2279.94	2502.09	1588.75	2306.67	4321.81	4738.42	12460.8	4022.46	2649.76	1378.21	5346.4	2256.72	2588.55
Apol6	Endogenous	mRNA	15.01	19.17	34.68	24.46	17.2	22.93	28.01	34.17	59.48	58.35	32.74	22.97	30.02	37.76	71.75	41.41	31.35	68.67	46.68	59.93	36.1
Aqp9	Endogenous	mRNA	8.58	13.69	22.19	6.52	4.53	7.05	8.96	10.05	8.67	8.19	12.47	7.66	11.26	7.75	7.87	6.9	8.18	13.73	5.98	9.82	6.37
Areg	Endogenous	mRNA	1431.53	934.59	1027.78	1015.03	1381.07	1175.43	2114.5	1810.83	2421.2	2183.7	1537.3	1646.06	2199.06	2558.98	1083.25	2914.76	2448.03	1684.26	3335.67	2025.84	1818.78
Arg1	Endogenous	mRNA	28.59	49.28	38.84	29.35	18.1	30.86	33.62	29.14	38.41	48.12	48.33	97.34	60.04	23.24	152.25	19.55	57.25	51.01	71.81	46.18	23.36
Arg2	Endogenous	mRNA	55.75	72.1	72.12	113.32	77.83	42.33	62.75	66.32	92.93	86	99.78	53.59	62.54	46.47	101.5	128.83	70.88	106.92	86.17	52.07	96.62
Arid1a	Endogenous	mRNA	459.55	311.23	364.79	290.24	324	359.77	340.65	324.58	416.34	433.05	428.76	322.65	367.76	417.3	426.12	447.45	496.15	473.79	475.16	536.43	474.6
Arnt2	Endogenous	mRNA	9.29	10.04	19.42	8.97	9.96	10.58	13.45	14.07	9.91	7.17	14.03	8.75	17.51	14.52	10.5	11.5	14.99	11.77	11.97	11.79	11.68
Atf3	Endogenous	mRNA	5837.62	5320.04	4725.57	2951.34	4818.37	4435.42	4711.96	3762.34	6262.41	7708.97	4850.45	3391.64	4328.06	4875.91	3231.37	8348.58	8145.55	2917.29	5984.33	6556.97	6444.84
Atm	Endogenous	mRNA	148.66	136.9	131.77	123.92	118.56	141.97	122.14	113.55	114	120.8	124.73	147.65	137.6	147.17	134.75	101.22	145.85	135.37	123.28	135.58	132.72
Axin1	Endogenous	mRNA	1038.45	986.61	957.04	873.99	933.99	881.79	980.49	937.57	1170.95	1036.05	1013.43	871.7	909.39	1033.08	906.5	1143.36	1277.17	1145.73	1016.14	1155.38	1072.37
Axl	Endogenous	mRNA	4425.39	5239.72	3869.78	4577.84	4514.28	5117.04	4308.55	4351.21	3272.46	3394.81	3639.01	5405.19	5231.2	5123.77	4815.11	3875.23	4194.08	5208.75	4701.29	4051.69	4181.18
B2m	Endogenous	mRNA	57349.2	69627.8	70993.1	65541	67638.2	67966.8	69914	61693.7	70874.1	58537	62051.8	65728.6	73692.1	73955.8	77184.4	71568	70639.7	80265.8	81013.5	72955.9	67271.6
Bad	Endogenous	mRNA	678.24	977.49	779.5	844.64	890.55	895.9	1060.05	936.56	859.94	678.76	873.11	1041.23	961.93	801.68	670.25	873.05	937.77	842.62	793.52	753.55	813.3
Bambi	Endogenous	mRNA	16.44	21.9	16.64	8.97	17.2	13.23	15.69	19.09	9.91	21.5	21.83	18.59	20.01	19.36	16.62	16.1	23.17	11.77	15.56	9.82	16.99
Batf3	Endogenous	mRNA	15.01	27.38	40.22	25.27	32.58	28.22	26.89	19.09	29.74	27.64	20.27	19.69	35.02	26.14	37.62	34.51	34.08	17.66	41.89	16.7	20.17
Bax	Endogenous	mRNA	832.62	771.22	790.6	783.49	839.87	794.5	917.74	797.89	975.17	724.83	838.81	815.92	918.15	894.63	730.62	1036.38	978.67	958.37	898.85	896.99	815.43
Bbc3	Endogenous	mRNA	25.73	31.94	37.45	28.54	44.35	23.81	41.46	36.18	47.09	56.31	76.4	42.66	20.01	27.11	36.75	33.36	29.99	31.39	37.1	33.4	36.1
Bbs1	Endogenous	mRNA	12.86	13.69	18.03	13.04	19.91	11.46	13.45	23.11	24.78	15.36	12.47	12.03	10.01	13.55	12.25	14.95	10.9	11.77	13.17	7.86	6.37
Bcat1	Endogenous	mRNA	2210.55	2651.35	2962.67	2768.72	2429.1	2666.54	2800.28	2718.25	3194.4	2473.42	3038.74	3202.43	3191.01	2862.03	3409.87	3331.15	3054.58	4417.14	3695.92	3654.77	3188.44
Bcl2	Endogenous	mRNA	70.04	59.32	51.32	53.81	54.3	64.37	70.6	69.34	76.82	90.09	85.75	79.84	75.05	53.25	64.75	52.91	72.24	46.1	65.83	54.04	57.33
Bcl2l1	Endogenous	mRNA	1352.92	1317.92	1905.76	1495.24	1852.59	2167.45	1177.71	1329.48	1460.9	1408.7	1244.19	1836.37	1798.77	2303.37	1694.87	1656.37	1478.9	1668.57	2116.06	1418.68	1511.94
Bcl6b	Endogenous	mRNA	32.88	34.68	26.35	19.57	33.49	34.39	33.62	39.19	38.41	50.16	59.25	41.56	36.28	26.14	39.37	47.16	35.44	32.37	34.71	30.46	21.24
Bid	Endogenous	mRNA	361.64	372.38	424.43	392.97	356.58	389.75	403.4	392.92	422.53	334.77	394.46	365.3	401.53	378.57	400.75	446.3	444.35	514.99	412.92	448	392.85
Birc3	Endogenous	mRNA	266.58	285.67	338.43	361.17	354.77	224.86	276.78	249.21	276.32	252.87	233.87	199.06	283.95	313.7	443.62	330.12	282.15	336.46	307.59	313.41	333.39
Birc5	Endogenous	mRNA	3415.52	3984.78	3240.07	3438.88	3729.62	3654.15	3835.68	3444.79	4149.75	4242.49	3592.24	4083.97	4428.13	4176.86	3361.74	3782.05	4394.45	3684.38	3711.48	3804.1	3685.34
Blk	Endogenous	mRNA	7.15	8.21	27.74	14.68	6.34	9.7	13.45	11.05	11.15	19.45	18.71	12.03	7.51	12.59	11.37	11.5	16.36	10.79	7.18	7.86	15.93
Blm	Endogenous	mRNA	285.88	221.78	217.76	199.75	246.17	245.14	255.49	220.07	270.12	320.44	271.29	283.28	265.19	301.11	230.12	274.91	323.04	240.33	209.45	261.34	313.22
Bmp2	Endogenous	mRNA	41.45	52.94	72.12	35.06	57.92	48.5	53.79	60.29	71.87	86	43.66	40.47	51.29	45.51	42	73.62	84.51	51.01	43.09	31.44	57.33
Bnip3	Endogenous	mRNA	1978.27	2272.59	2220.62	2608.92	2196.5	2710.63	2180.61	1917.35	2909.41	2159.13	1797.68	2243.23	2959.59	3461.35	2110.49	1851.92	1917.8	1894.18	3111.85	2488.58	1640.41
Bnip3l	Endogenous	mRNA	1219.98	1682.99	1452.21	1809.12	1544.88	1696.57	1614.73	1773.64	1594.72	1185.52	1473.38	1591.37	1752.49	1767.95	1330	1432.07	1334.42	1719.57	2020.31	1707.52	1521.49
Brca1	Endogenous	mRNA	445.25	365.07	341.21	325.3	344.82	358.01	292.47	350.71	299.86	351.15	300.91	376.24	442.81	515.09	412.12	376.13	478.43	353.14	369.83	475.51	427.89
Brca2	Endogenous	mRNA	330.19	271.07	213.6	243.77	228.07	279.53	258.85	213.04	251.54	300.99	219.84	298.59	272.69	322.41	250.25	222	260.34	260.93	253.74	256.42	249.51
Brd3	Endogenous	mRNA	365.92	306.66	260.76	256	277.84	392.4	287.98	333.63	351.9	441.24	325.86	368.59	387.77	336.94	308	374.98	354.39	353.14	318.37	436.21	434.26
Brd4	Endogenous	mRNA	2525.01	1707.63	1968.18	1708.84	1716.84	1838.54	1507.15	1568.65	1762	2114.08	1950.47	1776.21	2002.67	2138.78	2130.62	1979.6	2141.34	2037.4	2254.9	2384.44	2212.69
Brip1	Endogenous	mRNA	240.85	234.56	187.25	200.56	223.54	260.13	190.5	181.89	206.93	203.73	210.48	305.15	238.92	252.7	231.87	202.45	268.52	194.22	187.91	228.91	226.15
Btla	Endogenous	mRNA	23.58	27.38	41.61	22.01	21.72	29.1	44.82	29.14	17.35	31.74	24.95	28.44	31.27	28.08	33.25	26.46	32.71	20.6	33.51	11.79	39.28
C1qa	Endogenous	mRNA	816.9	2614.84	3258.11	3619.06	3417.39	2237.99	1497.07	1729.43	1255.21	1070.86	1138.17	1381.38	2675.64	2765.21	6435.61	2282.12	1661.55	1100.61	3297.37	2105.42	1592.63
C1qb	Endogenous	mRNA	1911.09	4941.28	6424.67	6688.62	6112.56	4416.9	2944.83	3186.53	3146.07	2302.45	2497.73	2389.79	5194.93	6346.62	13656.1	5013.98	3267.21	2536.69	6899.93	4502.64	3448.57
C2	Endogenous	mRNA	797.6	944.63	769.8	830.78	642.57	998.19	915.5	821	733.55	560	787.36	1054.35	861.86	947.88	883.75	644.15	846.45	1093.74	890.47	856.71	788.88
C5ar1	Endogenous	mRNA	135.79	385.15	446.62	570.7	500.48	223.09	279.02	331.62	208.17	158.68	268.17	171.71	285.2	247.86	567	454.35	268.52	369.81	500.29	247.58	383.29
C7	Endogenous	mRNA	12.15	9.13	16.64	11.41	17.2	7.94	16.81	11.05	9.91	15.36	24.95	15.31	13.76	5.81	16.62	19.55	16.36	12.75	8.38	11.79	10.62
Casp1	Endogenous	mRNA	373.79	482.81	532.61	580.48	464.28	521.14	567	550.68	555.12	450.46	567.52	475.77	589.17	515.09	763.87	618.84	586.11	776.9	619.98	704.43	581.84
Casp3	Endogenous	mRNA	5226.56	6032.85	4588.26	5646.68	5484.47	5381.58	6246	5544.02	5341.76	4708.31	4791.21	7156.25	6136.84	6136.52	4885.11	5690.33	6238.65	6926.36	6112.39	6012.69	5550.84
Casp8	Endogenous	mRNA	768.3	767.57	814.18	798.17	898.69	882.67	875.16	887.32	911.98	901.94	863.76	901.23	855.61	990.48	839.12	969.67	978.67	958.37	1038.88	956.92	1091.48
Casp9	Endogenous	mRNA	162.24	184.36	198.34	168.76	181.01	201.93	152.4	148.72	132.58	154.59	129.41	213.28	201.39	203.32	158.37	139.18	140.39	139.29	152	124.77	152.89
Cblc	Endogenous	mRNA	16.44	11.86	26.35	12.23	20.82	9.7	22.41	22.11	23.54	20.48	42.1	12.03	17.51	14.52	15.75	24.16	24.53	17.66	23.94	7.86	22.3
Ccl1	Endogenous	mRNA	18.58	34.68	38.84	19.57	13.58	17.64	29.13	23.11	23.54	30.71	20.27	21.87	22.52	25.17	21.87	21.85	24.53	112.81	33.51	17.68	19.11
Ccl11	Endogenous	mRNA	50.03	51.11	40.22	48.1	39.82	55.55	108.69	76.37	61.96	63.47	60.81	33.91	61.29	30.98	71.75	50.61	94.05	66.7	67.02	56.98	64.77
Ccl12	Endogenous	mRNA	356.63	832.37	757.31	694.62	743.03	615.49	1094.79	722.52	786.83	851.77	629.89	686.86	649.21	394.06	364	760.32	932.32	771.99	755.22	693.62	999.11
Ccl17	Endogenous	mRNA	34.31	35.59	47.16	44.84	55.21	30.86	24.65	44.22	35.93	35.83	43.66	18.59	42.53	37.76	33.25	31.06	44.98	40.22	38.3	28.49	32.91
Ccl19	Endogenous	mRNA	32.16	43.81	41.61	42.39	26.25	27.34	36.98	20.1	45.85	27.64	15.59	36.09	41.28	36.79	42	36.81	31.35	35.31	37.1	23.58	26.54
Ccl2	Endogenous	mRNA	12086.2	15365	11354.1	14646.6	8980.6	9451.94	11629.2	9934.42	12821	10260.2	13901.2	10082	10741.4	12055.2	9752.73	14083.8	13631.8	13643.8	8974.1	9516.16	11345.9
Ccl20	Endogenous	mRNA	7.86	10.95	9.71	12.23	9.05	9.7	10.09	3.01	12.39	15.36	12.47	12.03	10.01	7.75	14.87	14.95	6.82	14.71	11.97	10.81	11.68
Ccl21a	Endogenous	mRNA	15.72	21.9	49.93	13.86	21.72	19.4	28.01	27.13	39.65	38.9	31.18	35	26.27	26.14	27.12	24.16	35.44	10.79	23.94	43.23	32.91
Ccl22	Endogenous	mRNA	92.2	83.97	212.21	206.27	124.89	58.2	170.33	174.85	105.32	119.78	59.25	50.31	110.08	95.85	122.5	108.12	140.39	208.94	143.62	73.68	151.83
Ccl24	Endogenous	mRNA	11.44	11.86	16.64	11.41	9.96	9.7	15.69	17.08	17.35	13.31	17.15	19.69	25.02	13.55	12.25	8.05	17.72	29.43	13.17	13.75	16.99
Ccl25	Endogenous	mRNA	98.63	95.83	113.74	119.03	114.03	97	81.8	99.48	109.04	81.9	113.82	131.25	133.84	120.06	138.25	97.77	95.41	86.32	82.58	113.97	92.37
Ccl26	Endogenous	mRNA	9.29	13.69	16.64	11.41	17.2	8.82	15.69	19.09	14.87	12.29	6.24	12.03	22.52	20.33	10.5	11.5	10.9	11.77	8.38	6.88	8.49
Ccl27a	Endogenous	mRNA	36.45	32.86	22.19	34.24	45.25	30.86	41.46	32.16	34.69	62.45	31.18	42.66	33.77	38.73	39.37	36.81	31.35	36.29	33.51	20.63	25.48
Ccl28	Endogenous	mRNA	13.58	13.69	11.1	11.41	12.67	11.46	15.69	15.07	8.67	15.36	17.15	8.75	7.51	15.49	17.5	13.8	13.63	13.73	13.17	7.86	7.43
Ccl3	Endogenous	mRNA	547.46	971.1	726.8	901.71	697.78	677.22	897.57	800.9	867.37	1048.34	633.01	566.55	716.76	492.82	727.12	1176.72	928.23	1011.34	708.54	502.04	1132.89
Ccl4	Endogenous	mRNA	404.52	544.87	478.52	494.88	586.46	442.66	824.73	623.04	812.85	624.5	569.08	430.93	606.68	426.01	357	889.15	706.06	443.38	526.62	365.48	656.16
Ccl5	Endogenous	mRNA	1096.34	1489.5	1565.94	1586.55	1640.82	1386.18	1934.09	1532.47	1706.24	1492.65	1693.22	1142.94	2073.97	1728.26	5027.74	2307.42	1656.1	1807.86	2537.36	2160.44	1855.94
Ccl6	Endogenous	mRNA	35.73	101.31	97.09	118.22	83.26	58.2	63.87	102.5	53.28	59.38	79.52	62.34	68.8	41.63	293.12	74.77	81.78	81.42	142.43	70.74	79.63
Ccl7	Endogenous	mRNA	3026.02	4893.82	3248.4	4336.51	2724.14	3355.22	3081.54	2735.33	3100.23	2742.67	3277.29	2487.13	3332.36	3085.69	2135.87	3688.88	3396.7	3421.49	2593.61	2627.11	2920.88
Ccl8	Endogenous	mRNA	403.09	917.25	2087.46	1420.23	884.21	901.19	645.44	829.04	633.18	660.33	589.35	517.33	1165.82	984.67	1775.37	930.56	692.43	1913.8	3272.23	1516.93	1287.91
Ccl9	Endogenous	mRNA	504.57	1426.53	1216.42	1594.7	1593.76	805.08	1333.47	1727.42	729.83	660.33	1016.55	526.08	970.69	741.65	2360.74	1483.83	1254	1539.08	1541.56	935.31	1440.8
Ccna1	Endogenous	mRNA	12.86	19.17	31.9	20.38	11.77	14.99	20.17	18.09	27.26	18.43	23.39	17.5	18.76	12.59	15.75	23.01	23.17	14.71	32.32	11.79	9.56
Ccnb1	Endogenous	mRNA	33.59	32.86	37.45	30.17	35.3	24.69	26.89	33.16	30.98	29.69	26.51	33.91	33.77	34.86	20.12	26.46	31.35	30.41	37.1	32.42	33.98
Ccnd1	Endogenous	mRNA	4546.17	5203.22	5725.61	6027.42	5041.91	4912.47	4406.04	4725.03	4948.97	4120.66	5034.43	5182.07	6289.45	6869.45	7341.23	5629.37	4784.28	6816.5	6190.19	6291.71	5157.99
Ccnd2	Endogenous	mRNA	3322.61	3270.15	3424.55	3410.35	2988.4	3524.53	3140.93	3235.77	3054.38	2937.19	3088.64	4144.13	4176.71	3601.74	4270.86	3227.63	3126.82	3979.64	3783.29	3847.33	3622.7
Ccnd3	Endogenous	mRNA	540.31	610.59	567.29	512.82	602.75	608.44	677.94	641.12	640.61	531.34	673.54	644.2	669.22	609	458.5	652.2	618.82	670.96	687	694.6	747.47
Ccne1	Endogenous	mRNA	483.85	489.2	470.2	489.17	531.25	516.73	587.17	517.52	607.16	460.7	601.82	602.64	494.1	528.64	487.37	544.07	580.66	621.91	576.89	607.16	500.09
Ccno	Endogenous	mRNA	37.16	31.94	36.06	33.43	28.06	19.4	22.41	24.12	37.17	23.55	28.06	41.56	53.79	43.57	54.25	33.36	35.44	29.43	35.91	37.33	18.05
Ccr2	Endogenous	mRNA	59.32	107.7	108.19	145.12	98.65	89.06	143.43	141.69	128.87	131.04	106.02	99.53	131.34	61	132.12	131.13	147.21	137.33	155.59	66.81	148.65
Ccr4	Endogenous	mRNA	1	1	15.26	1	9.96	2.65	4.48	6.03	6.2	9.21	10.91	1.09	13.76	1	9.62	9.2	1.36	1	2.39	1	1.06
Ccr5	Endogenous	mRNA	136.51	235.47	264.92	287.8	234.4	267.18	320.48	239.17	324.64	420.77	194.89	226.4	262.69	198.48	490	322.07	298.51	248.18	372.23	221.05	406.65
Ccr9	Endogenous	mRNA	18.58	10.04	18.03	21.2	15.39	19.4	17.93	20.1	8.67	13.31	18.71	10.94	16.26	23.24	21	13.8	10.9	14.71	16.76	10.81	28.67
Cd14	Endogenous	mRNA	460.26	1008.52	1195.61	1466.7	1278.81	494.69	654.41	890.34	620.79	481.17	609.62	279.99	704.25	932.39	882.87	1267.59	741.5	670.96	1018.53	421.48	975.75
Cd163	Endogenous	mRNA	21.44	21.9	38.84	19.57	23.53	17.64	30.26	44.22	38.41	32.76	34.3	31.72	26.27	25.17	18.37	26.46	27.26	20.6	35.91	12.77	22.3
Cd19	Endogenous	mRNA	19.3	18.25	66.58	7.34	8.15	13.23	42.58	12.06	14.87	16.38	20.27	18.59	16.26	12.59	7	12.65	38.17	12.75	4.79	5.89	29.73
Cd1d1	Endogenous	mRNA	25.01	31.94	38.84	53.81	40.73	30.86	44.82	34.17	54.52	63.47	45.21	32.81	50.04	40.66	60.37	52.91	31.35	56.89	56.25	42.25	54.15
Cd2	Endogenous	mRNA	100.06	125.95	285.73	200.56	150.23	133.15	183.77	154.75	260.21	179.16	107.58	88.59	301.46	249.8	484.75	276.06	205.82	269.76	506.27	287.86	268.62
Cd200r1	Endogenous	mRNA	37.88	73.01	74.9	67.67	66.07	68.78	71.72	79.39	58.24	84.97	63.92	49.22	71.3	51.32	133	57.51	58.61	57.88	74.21	50.11	104.05
Cd209e	Endogenous	mRNA	5.72	13.69	20.81	7.34	15.39	9.7	13.45	8.04	13.63	11.26	7.8	10.94	13.76	7.75	7.87	14.95	19.08	16.68	10.77	4.91	12.74
Cd244	Endogenous	mRNA	171.53	258.29	230.25	316.33	275.13	256.6	340.65	331.62	276.32	334.77	249.46	316.09	346.5	315.64	487.37	347.38	294.42	430.63	323.15	246.6	335.51
Cd247	Endogenous	mRNA	37.88	37.42	87.38	82.34	45.25	52.91	57.15	67.33	74.35	54.26	37.42	32.81	95.07	76.49	140	75.92	38.17	94.17	120.88	78.6	76.45
Cd27	Endogenous	mRNA	34.31	53.85	88.77	117.4	41.63	52.03	50.43	61.3	73.11	58.35	46.77	42.66	113.83	136.52	187.25	83.97	51.8	93.19	173.55	88.42	84.94
Cd274	Endogenous	mRNA	691.82	904.47	1545.14	1251.47	949.37	895.02	866.19	864.21	1327.08	842.56	843.49	589.52	1089.52	1088.27	2301.24	1304.39	895.52	1468.46	1683.99	1453.07	1219.95
Cd276	Endogenous	mRNA	292.31	266.5	291.27	313.07	287.8	303.34	335.05	290.42	313.49	271.3	328.98	342.34	280.2	277.88	303.62	323.22	344.85	370.79	290.84	355.65	341.88
Cd28	Endogenous	mRNA	46.46	64.8	108.19	75.01	66.07	55.55	67.23	77.38	109.04	115.69	70.16	40.47	88.81	112.31	184.62	88.57	84.51	103.98	157.99	94.32	107.24
Cd300a	Endogenous	mRNA	100.77	299.36	239.95	361.17	331.24	191.35	264.45	211.03	151.17	114.66	116.93	119.22	215.15	223.66	443.62	226.6	173.11	175.59	245.36	109.05	216.6
Cd36	Endogenous	mRNA	140.08	296.62	534	361.99	284.18	166.66	211.79	326.59	201.97	168.92	219.84	146.56	302.71	198.48	1632.75	247.31	280.79	265.83	549.36	603.23	252.7
Cd38	Endogenous	mRNA	337.34	484.64	542.32	688.1	594.6	543.18	378.75	471.3	460.95	377.77	367.95	739.36	652.96	856.87	1216.25	427.9	402.1	661.15	708.54	499.09	426.82
Cd3d	Endogenous	mRNA	35.73	52.02	130.38	87.24	72.4	52.91	70.6	80.39	115.24	73.71	68.6	57.97	135.1	131.68	185.5	93.17	79.06	121.64	213.04	126.74	72.2
Cd3e	Endogenous	mRNA	47.17	80.32	234.41	176.1	92.31	89.06	97.49	125.61	164.8	116.71	87.31	72.19	212.65	260.45	404.25	179.44	92.69	234.44	388.98	224.98	124.23
Cd3g	Endogenous	mRNA	87.91	169.76	367.56	278.01	133.04	149.02	140.07	189.93	244.1	191.44	151.24	122.5	411.54	400.84	708.75	338.18	178.56	385.51	635.54	315.37	185.81
Cd4	Endogenous	mRNA	44.31	75.75	102.64	61.96	96.84	44.97	60.51	55.27	50.8	45.05	43.66	47.03	75.05	69.71	62.12	58.66	65.43	60.82	57.45	44.21	80.69
Cd40	Endogenous	mRNA	480.99	704.59	694.9	847.9	627.18	497.33	445.98	480.34	427.49	340.91	472.42	637.64	681.73	669.03	858.37	588.93	444.35	663.11	535	464.71	461.86
Cd40lg	Endogenous	mRNA	20.01	23.73	23.58	16.31	11.77	16.75	25.77	35.17	22.3	17.4	20.27	26.25	20.01	18.4	21.87	16.1	24.53	23.54	39.5	15.72	20.17
Cd44	Endogenous	mRNA	81.48	89.44	69.35	91.31	81.45	78.48	93.01	89.44	114	94.19	93.55	86.4	98.82	91.01	116.37	104.67	106.32	91.23	106.52	85.47	97.68
Cd47	Endogenous	mRNA	1537.31	2292.66	2124.91	2338.24	2193.79	2285.61	1938.57	1852.03	1670.31	1366.73	1674.51	2051.83	2411.71	2405.03	2775.49	1961.19	1861.92	2199.25	2379.37	1708.51	1864.44
Cd48	Endogenous	mRNA	134.36	293.88	277.4	317.15	338.48	244.26	268.93	278.36	162.32	145.37	166.83	169.53	283.95	263.35	489.12	270.31	212.63	229.54	362.65	188.63	286.67
Cd5	Endogenous	mRNA	27.16	27.38	52.71	38.32	25.34	35.27	41.46	38.19	40.89	37.88	17.15	36.09	43.78	52.28	56.87	48.31	35.44	65.72	76.6	48.14	49.9
Cd6	Endogenous	mRNA	32.88	41.98	88.77	61.15	53.4	32.63	47.06	65.32	48.32	67.57	34.3	41.56	75.05	91.98	141.75	75.92	62.7	107.9	108.91	99.23	71.14
Cd68	Endogenous	mRNA	1074.9	2799.2	3013.99	3791.09	3085.24	1934.65	1950.9	2145.46	1275.03	1046.29	1289.4	1077.32	2244.09	2093.27	4190.36	2087.72	1716.07	2182.57	2895.22	1764.51	2274.27
Cd69	Endogenous	mRNA	80.05	120.47	144.25	121.48	142.99	98.76	112.06	94.46	133.82	123.88	101.34	78.75	101.32	117.15	94.5	138.03	117.22	103	147.21	68.77	158.2
Cd7	Endogenous	mRNA	33.59	34.68	37.45	32.61	55.21	35.27	60.51	41.2	40.89	27.64	28.06	27.34	31.27	40.66	99.75	59.81	35.44	45.12	65.83	26.53	25.48
Cd70	Endogenous	mRNA	32.16	40.16	45.77	30.17	26.25	16.75	30.26	35.17	39.65	22.52	29.62	32.81	30.02	20.33	27.12	34.51	43.62	35.31	32.32	16.7	28.67
Cd74	Endogenous	mRNA	5123.64	11185	24209	23921.3	15971	11447.4	8512.9	9906.28	7040.57	4649.95	5572.33	4810.21	18070.3	22286.3	55602.6	9894.53	6936.53	10833.4	19141.5	16252.9	7967.39
Cd79a	Endogenous	mRNA	5.72	9.13	12.48	12.23	10.86	8.82	7.84	6.03	16.11	17.4	15.59	13.12	15.01	19.36	14	14.95	10.9	10.79	9.57	6.88	12.74
Cd79b	Endogenous	mRNA	18.58	21.9	52.71	23.64	25.34	13.23	25.77	23.11	19.83	15.36	23.39	17.5	25.02	41.63	92.75	19.55	28.62	15.69	45.48	29.47	22.3
Cd80	Endogenous	mRNA	122.21	193.49	219.15	211.97	223.54	130.51	192.74	187.92	195.78	187.35	160.59	85.31	131.34	152.98	121.62	261.11	189.46	218.75	223.81	114.95	231.46
Cd84	Endogenous	mRNA	97.91	288.41	291.27	376.66	319.48	192.23	219.63	243.19	153.65	170.97	101.34	152.03	237.67	236.24	536.37	212.8	203.09	240.33	301.61	178.81	252.7
Cd86	Endogenous	mRNA	239.42	367.81	478.52	657.12	380.11	206.34	341.77	382.87	307.3	257.99	246.34	169.53	407.79	353.4	560.87	431.35	309.41	494.39	539.79	329.13	359.93
Cd8a	Endogenous	mRNA	27.87	60.24	97.09	95.39	49.78	62.61	33.62	71.35	106.56	82.93	57.69	39.37	142.6	146.2	269.5	119.63	49.07	102.02	232.19	133.62	56.27
Cd8b1	Endogenous	mRNA	17.87	32.86	33.29	38.32	19.91	25.57	31.38	29.14	24.78	32.76	31.18	20.78	40.03	42.6	60.37	42.56	27.26	39.24	73.01	41.26	19.11
Cd96	Endogenous	mRNA	16.44	18.25	40.22	36.69	27.15	17.64	21.29	28.14	47.09	29.69	15.59	17.5	23.77	42.6	66.5	40.26	27.26	38.26	45.48	34.39	26.54
Cdc20	Endogenous	mRNA	881.22	892.61	794.76	763.92	877.88	986.73	1114.96	1039.06	1039.6	1097.48	1014.99	1093.73	944.42	877.2	658	1014.53	1027.73	962.29	995.79	799.73	982.12
Cdc25c	Endogenous	mRNA	342.34	278.37	242.73	221.76	271.51	282.17	252.13	244.19	289.95	291.77	255.7	332.49	332.74	342.75	214.37	284.11	365.3	264.85	276.48	254.46	255.88
Cdh1	Endogenous	mRNA	13.58	16.43	19.42	11.41	12.67	8.82	12.33	15.07	21.06	13.31	18.71	8.75	16.26	17.43	19.25	16.1	19.08	8.83	14.36	7.86	18.05
Cdh11	Endogenous	mRNA	4.29	8.21	5.55	6.52	6.34	3.53	4.48	9.04	16.11	9.21	7.8	9.84	8.76	11.62	18.37	4.6	8.18	4.9	7.18	4.91	9.56
Cdh2	Endogenous	mRNA	15.72	25.56	31.9	17.94	14.48	13.23	31.38	28.14	28.5	30.71	38.98	20.78	31.27	20.33	18.37	14.95	23.17	11.77	27.53	17.68	14.86
Cdh5	Endogenous	mRNA	145.08	172.5	188.63	191.59	146.61	178.12	279.02	265.29	210.65	341.94	171.5	277.81	207.65	181.06	257.25	157.59	294.42	240.33	195.09	198.46	241.02
Cdk2	Endogenous	mRNA	469.55	398.84	349.53	322.04	386.45	391.52	391.08	333.63	380.4	444.32	375.75	462.65	429.05	386.32	322.87	416.39	470.25	371.77	330.33	363.51	413.02
Cdk6	Endogenous	mRNA	1851.77	1457.56	1556.23	1535.19	1414.56	1787.39	1413.03	1593.77	1569.94	1777.26	1382.95	1718.24	1871.32	1900.6	2069.37	1571.25	1789.68	2112.93	1764.18	1984.58	1998.22
Cdkn1a	Endogenous	mRNA	2519.3	3280.19	3900.3	3961.48	3620.11	2571.31	3145.41	3035.8	3050.66	2231.81	2945.2	2241.04	3452.44	3819.59	3522.74	4530.87	3190.88	3188.03	4534.93	3498.56	3414.6
Cdkn1c	Endogenous	mRNA	50.03	54.76	59.64	43.21	64.26	46.74	66.11	46.23	73.11	87.02	59.25	74.37	47.53	65.84	61.25	54.06	83.15	51.01	65.83	41.26	66.89
Cdkn2a	Endogenous	mRNA	10.01	23.73	13.87	15.49	14.48	10.58	20.17	7.03	19.83	24.57	23.39	16.41	13.76	11.62	16.62	25.31	16.36	24.52	20.35	15.72	13.8
Cdkn2b	Endogenous	mRNA	16.44	16.43	16.64	10.6	10.86	12.35	10.09	13.06	19.83	19.45	23.39	16.41	8.76	7.75	14.87	10.35	17.72	7.85	15.56	7.86	10.62
Ceacam3	Endogenous	mRNA	12.15	14.6	22.19	14.68	15.39	15.87	22.41	7.03	21.06	18.43	23.39	12.03	30.02	15.49	13.12	19.55	17.72	21.58	21.54	7.86	6.37
Cebpb	Endogenous	mRNA	9879.93	9726.48	10533	7765.61	10602.4	9355.82	10318.1	7713.6	11677.3	10137.3	9470.16	8685.28	8129.5	9244.47	7550.36	13264.8	12077.9	8440.92	9106.95	9442.47	10297.9
Cenpf	Endogenous	mRNA	911.95	710.07	595.03	628.59	730.36	831.53	619.67	688.36	649.29	763.73	742.15	658.42	804.32	986.61	684.25	766.07	821.92	814.17	760.01	814.46	828.17
Cep55	Endogenous	mRNA	789.02	695.47	604.74	562.55	712.26	675.45	587.17	563.75	710	673.64	692.25	749.2	726.76	810.39	553	671.75	785.11	641.53	701.36	674.95	675.27
Ces3a	Endogenous	mRNA	9.29	15.52	12.48	8.97	8.15	9.7	14.57	15.07	14.87	8.19	15.59	14.22	11.26	10.65	13.12	16.1	13.63	9.81	14.36	14.74	10.62
Chd9	Endogenous	mRNA	147.23	101.31	102.64	94.57	89.6	120.81	99.73	104.51	118.95	144.35	101.34	107.19	136.35	130.71	119	105.82	149.93	124.58	107.72	117.9	140.15
Chuk	Endogenous	mRNA	820.47	721.93	748.99	769.63	760.22	731.89	633.12	661.22	717.44	763.73	700.05	712.02	824.33	886.88	899.5	800.58	928.23	797.5	840.2	888.15	865.33
Clec14a	Endogenous	mRNA	11.44	20.08	19.42	9.78	7.24	14.11	21.29	28.14	27.26	15.36	17.15	18.59	20.01	21.3	33.25	9.2	20.45	12.75	19.15	15.72	14.86
Clec4e	Endogenous	mRNA	358.78	811.38	689.35	1469.96	952.99	432.08	721.64	852.15	649.29	512.91	721.88	304.06	591.67	386.32	715.75	1252.63	572.48	1234.01	721.71	379.23	1089.36
Clec5a	Endogenous	mRNA	28.59	81.23	72.12	112.51	69.69	45.85	47.06	51.25	58.24	36.86	42.1	32.81	61.29	61.97	89.25	64.41	46.34	76.51	81.39	60.91	44.59
Clec7a	Endogenous	mRNA	212.26	520.23	761.47	1243.31	610.89	300.69	419.09	396.93	299.86	166.87	321.18	181.56	607.93	508.31	868.87	296.77	246.71	621.91	501.49	260.35	349.32
Cmklr1	Endogenous	mRNA	175.81	244.6	321.79	295.13	314.04	245.14	259.97	263.28	180.91	194.52	216.72	177.18	201.39	177.18	251.12	282.96	203.09	248.18	234.59	185.69	269.69
Cmtm4	Endogenous	mRNA	292.31	289.32	309.31	276.38	274.22	313.92	309.27	322.57	328.36	445.34	321.18	337.96	302.71	300.15	394.62	408.34	361.21	378.64	347.09	398.88	436.38
Cmtm6	Endogenous	mRNA	733.99	955.58	865.5	988.94	850.73	857.1	754.14	656.2	669.11	755.54	687.58	856.39	884.38	886.88	952.87	866.15	816.46	942.68	871.32	902.89	832.41
Cntfr	Endogenous	mRNA	10.72	20.08	16.64	7.34	9.05	8.82	11.21	11.05	8.67	11.26	18.71	10.94	11.26	11.62	9.62	10.35	9.54	17.66	11.97	6.88	12.74
Col11a1	Endogenous	mRNA	33.59	31.94	52.71	35.06	39.82	32.63	50.43	35.17	44.61	49.14	57.69	40.47	41.28	30.98	24.5	28.76	31.35	25.5	49.07	29.47	31.85
Col11a2	Endogenous	mRNA	33.59	21.9	22.19	19.57	38.92	25.57	40.34	27.13	34.69	43	32.74	37.19	30.02	24.21	41.12	37.96	39.53	24.52	27.53	33.4	47.78
Col17a1	Endogenous	mRNA	45.03	54.76	38.84	61.15	53.4	45.85	50.43	33.16	61.96	34.81	45.21	47.03	56.29	63.9	73.5	48.31	38.17	50.03	39.5	33.4	40.35
Col4a5	Endogenous	mRNA	12.15	26.47	27.74	25.27	13.58	12.35	16.81	22.11	19.83	13.31	35.86	13.12	20.01	13.55	25.37	13.8	8.18	12.75	34.71	5.89	12.74
Col5a1	Endogenous	mRNA	1237.14	1086.09	829.44	929.43	1079.7	1151.62	1360.36	1327.47	1039.6	1264.35	1019.67	1380.28	1354.71	1188.96	926.62	1093.9	1412.11	1246.76	1060.42	1128.85	1477.96
Col6a3	Endogenous	mRNA	1206.4	1694.86	1231.67	1821.35	1587.42	1800.62	965.92	1085.29	520.42	679.78	561.29	1803.55	1921.36	1820.24	1408.75	901.8	903.7	1747.04	991.01	635.65	860.02
Comp	Endogenous	mRNA	12.15	20.08	36.06	12.23	19.01	16.75	33.62	21.1	26.02	23.55	28.06	16.41	18.76	16.46	15.75	18.4	17.72	12.75	13.17	13.75	19.11
Cpa3	Endogenous	mRNA	14.29	26.47	70.74	50.55	22.63	27.34	45.94	126.62	43.37	32.76	81.07	26.25	52.54	37.76	556.5	57.51	39.53	222.67	74.21	162.11	39.28
Crabp2	Endogenous	mRNA	37.88	20.99	33.29	25.27	28.06	20.28	56.03	49.24	54.52	70.64	70.16	20.78	42.53	27.11	88.37	73.62	79.06	58.86	49.07	64.84	86
Csf1	Endogenous	mRNA	2504.29	2396.71	2466.12	2439.34	1840.83	1905.55	1308.81	1486.24	1754.57	1357.52	1671.39	1587	2259.1	2500.89	2547.12	2114.18	1722.89	2208.08	1494.89	1969.84	1666.95
Csf1r	Endogenous	mRNA	183.68	447.22	466.04	581.3	480.57	309.51	328.32	310.51	360.58	326.58	291.56	271.24	427.8	399.87	994	379.59	342.12	312.92	460.79	324.21	352.5
Csf2	Endogenous	mRNA	22.87	53.85	36.06	47.29	19.01	17.64	35.86	30.15	48.32	17.4	42.1	22.97	37.53	45.51	27.12	57.51	28.62	36.29	25.13	14.74	32.91
Csf2rb	Endogenous	mRNA	94.34	141.47	223.31	335.9	183.72	82.01	108.69	150.73	128.87	91.12	127.85	48.12	146.35	143.3	467.25	165.64	130.85	199.13	213.04	132.63	159.26
Csf3	Endogenous	mRNA	14.29	19.17	38.84	30.17	19.01	11.46	20.17	19.09	21.06	12.29	28.06	7.66	17.51	17.43	49.87	34.51	24.53	24.52	27.53	26.53	15.93
Csf3r	Endogenous	mRNA	66.47	93.09	115.12	92.94	107.7	109.34	109.81	93.46	73.11	77.81	60.81	79.84	92.57	92.95	141.75	85.12	111.77	109.86	111.31	56	119.98
Ctla4	Endogenous	mRNA	142.22	188.01	302.37	220.13	192.77	193.99	218.51	214.04	261.45	295.87	123.17	130.15	333.99	454.09	547.75	371.53	306.68	183.43	518.24	341.9	311.09
Ctnnb1	Endogenous	mRNA	4516.15	5447.82	4645.12	5426.55	4768.59	4994.48	4968.56	4903.9	4760.62	4654.05	4763.14	5716.91	5448.86	5837.34	5342.74	5142.81	5125.04	7420.75	5518.75	5628.54	5269.48
Ctss	Endogenous	mRNA	1904.66	6601.45	7728.47	9809.54	8147.97	4656.75	4054.19	4793.36	2443.51	1847.9	2647.4	2029.96	6335.73	5741.49	14528.5	4521.67	3204.51	4533.87	8253.59	3969.16	4653.66
Ctsw	Endogenous	mRNA	27.87	48.37	90.16	71.75	57.02	53.79	53.79	72.35	102.85	67.57	54.57	50.31	88.81	79.39	100.62	70.17	53.16	128.5	126.87	75.65	70.08
Cx3cl1	Endogenous	mRNA	45.03	41.98	73.51	53.81	44.35	39.68	61.63	66.32	61.96	48.12	65.48	51.41	35.02	46.47	41.12	50.61	44.98	47.08	61.04	35.37	38.22
Cx3cr1	Endogenous	mRNA	42.17	120.47	117.9	114.96	102.27	97	104.21	93.46	137.54	107.5	82.63	111.56	127.59	126.84	288.75	109.27	76.33	61.8	93.36	130.67	81.75
Cxcl1	Endogenous	mRNA	1037.02	1249.47	1626.97	1898.8	1409.13	592.56	945.75	1307.37	1018.54	706.4	1007.2	524.99	956.93	1151.2	1636.25	1874.92	1547.05	1115.32	929.96	865.55	1157.31
Cxcl10	Endogenous	mRNA	1032.02	1491.33	1629.75	1260.43	1171.11	1395.88	2632.2	1652.05	2244.01	2078.25	2128.21	1385.75	1285.91	970.15	1148	2145.23	1870.1	1946.17	1674.42	1739.95	2044.94
Cxcl11	Endogenous	mRNA	57.89	133.25	104.03	81.53	77.83	82.01	125.5	82.4	104.08	109.54	87.31	76.56	81.31	70.68	56.87	101.22	95.41	66.7	112.51	69.76	115.73
Cxcl12	Endogenous	mRNA	49.31	40.16	65.19	30.98	37.11	37.04	41.46	46.23	71.87	60.4	49.89	54.69	28.77	42.6	105.87	34.51	62.7	24.52	32.32	56.98	45.66
Cxcl13	Endogenous	mRNA	18.58	19.17	47.16	15.49	22.63	17.64	20.17	32.16	37.17	20.48	28.06	33.91	18.76	16.46	14.87	23.01	32.71	23.54	31.12	17.68	26.54
Cxcl14	Endogenous	mRNA	47.88	55.67	87.38	62.78	40.73	52.03	114.3	72.35	84.26	149.47	53.01	44.84	47.53	43.57	227.5	40.26	109.04	20.6	26.33	73.68	67.95
Cxcl15	Endogenous	mRNA	9.29	10.95	9.71	7.34	8.15	7.94	12.33	13.06	3.72	13.31	15.59	7.66	15.01	20.33	12.25	11.5	12.27	6.87	13.17	21.61	4.25
Cxcl16	Endogenous	mRNA	413.09	1045.94	1220.58	1574.32	1231.74	712.49	728.36	667.25	623.27	480.15	539.46	370.77	905.64	1042.76	1369.37	1036.38	647.45	607.2	1171.73	605.2	747.47
Cxcl2	Endogenous	mRNA	1565.89	2175.84	3491.13	4130.25	3023.7	1029.93	1602.4	2664.99	1799.17	1376.97	1562.25	532.64	2211.56	2613.2	3825.49	3149.41	2904.65	3075.22	3165.71	2099.53	2336.92
Cxcl3	Endogenous	mRNA	240.85	292.06	395.3	392.15	237.12	102.29	184.89	469.29	250.3	291.77	355.48	237.34	288.95	192.67	262.5	410.64	528.86	394.33	252.54	192.56	310.03
Cxcl5	Endogenous	mRNA	21.44	27.38	38.84	17.94	12.67	19.4	22.41	12.06	30.98	27.64	38.98	21.87	27.52	23.24	25.37	23.01	29.99	14.71	25.13	7.86	20.17
Cxcl9	Endogenous	mRNA	123.64	338.61	979.23	801.43	323.1	485.87	196.1	342.67	356.86	244.68	240.11	226.4	645.46	625.46	1385.12	383.04	154.02	600.33	760.01	647.44	298.35
Cxcr2	Endogenous	mRNA	9.29	22.82	20.81	21.2	22.63	19.4	14.57	21.1	24.78	15.36	31.18	19.69	16.26	11.62	9.62	16.1	14.99	17.66	13.17	9.82	15.93
Cxcr3	Endogenous	mRNA	30.73	31.94	73.51	50.55	43.44	25.57	60.51	40.2	59.48	56.31	40.54	50.31	57.54	61.97	69.12	72.47	46.34	38.26	116.1	54.04	63.71
Cxcr4	Endogenous	mRNA	502.43	1455.73	1227.51	1266.14	1654.39	923.24	1028.67	835.07	597.25	793.42	629.89	449.52	806.82	795.87	902.12	1433.22	899.61	671.94	1125.05	479.44	1355.86
Cxcr5	Endogenous	mRNA	10.01	19.17	33.29	17.94	18.1	14.11	26.89	10.05	13.63	23.55	15.59	9.84	20.01	19.36	23.62	24.16	20.45	14.71	21.54	9.82	13.8
Cxcr6	Endogenous	mRNA	34.31	88.53	152.57	119.85	64.26	58.2	44.82	95.47	142.5	108.52	98.23	65.62	211.4	166.53	733.25	211.65	50.43	183.43	332.73	201.41	82.82
Cybb	Endogenous	mRNA	135.79	541.22	636.64	948.18	615.42	356.24	351.86	394.92	227.99	175.06	224.51	183.75	501.6	468.61	1706.25	397.99	253.53	431.61	535	401.83	374.8
Dab2	Endogenous	mRNA	1362.21	1705.81	1686.61	1912.66	1568.41	1875.57	1150.82	1372.69	1214.32	1810.02	994.73	1810.12	2625.61	2284.01	2658.24	1272.19	1559.32	1424.31	1679.2	1060.08	1611.74
Ddb2	Endogenous	mRNA	19.3	20.99	26.35	26.9	19.91	17.64	25.77	18.09	24.78	20.48	15.59	18.59	31.27	28.08	20.12	23.01	25.9	18.64	25.13	10.81	30.79
Deptor	Endogenous	mRNA	43.6	41.07	62.42	44.84	25.34	39.68	31.38	37.18	29.74	38.9	46.77	32.81	41.28	33.89	38.5	37.96	42.25	36.29	33.51	25.54	37.16
Dkk1	Endogenous	mRNA	15.01	27.38	22.19	19.57	19.01	12.35	17.93	21.1	14.87	17.4	35.86	25.16	11.26	13.55	17.5	28.76	25.9	19.62	28.72	7.86	21.24
Dll1	Endogenous	mRNA	132.22	104.96	119.28	123.11	75.12	112.87	63.87	61.3	90.45	80.88	68.6	176.09	196.39	205.26	294	67.87	76.33	72.59	96.95	51.09	66.89
Dll4	Endogenous	mRNA	37.16	53.85	102.64	49.73	70.59	64.37	81.8	74.36	49.56	89.07	43.66	40.47	52.54	61.97	82.25	50.61	91.32	51.01	53.86	78.6	76.45
Dnmt1	Endogenous	mRNA	681.82	580.47	603.35	551.95	555.69	630.48	439.26	436.13	402.71	437.15	388.22	664.99	723.01	729.06	593.25	481.96	517.96	571.88	525.42	521.69	522.38
Dpp4	Endogenous	mRNA	34.31	45.63	49.93	53.81	70.59	37.92	75.08	58.28	54.52	63.47	32.74	35	58.79	50.35	84.87	51.76	61.34	48.07	74.21	47.16	83.88
Dsc3	Endogenous	mRNA	7.15	10.04	12.48	6.52	9.05	10.58	7.84	6.03	3.72	16.38	4.68	8.75	8.76	10.65	6.12	9.2	9.54	9.81	4.79	3.93	10.62
Dtx3l	Endogenous	mRNA	468.84	732.89	694.9	587.01	534.87	783.03	618.55	687.35	531.57	446.36	595.59	569.83	625.44	578.02	772.62	640.69	588.83	897.55	773.18	730.95	715.62
Dtx4	Endogenous	mRNA	299.46	357.77	402.24	364.43	318.57	353.6	255.49	279.36	278.8	295.87	314.94	310.62	328.98	356.3	531.12	323.22	282.15	429.65	360.26	382.18	333.39
Dusp1	Endogenous	mRNA	25344.5	15571.3	23453.1	12513	26060.3	25055.3	21394.9	16707.4	30100.2	28845.7	20281.2	14775.1	18160.3	21369.4	12067.1	31566.6	38041.2	13429.9	26479.5	22459.2	26618.1
Dusp2	Endogenous	mRNA	1214.98	942.8	1148.45	862.57	1183.78	941.75	1572.15	1111.42	2411.29	2010.68	1640.2	939.51	971.94	1137.65	798	2333.88	2270.83	1143.77	1588.24	1455.03	1745.52
Dusp5	Endogenous	mRNA	2831.62	3004.56	3511.93	3106.25	3477.12	1994.62	3288.84	3004.65	4346.76	3743.92	3285.09	1920.58	3618.81	3411.97	2948.74	5720.24	4382.18	3471.52	4039.42	3247.05	4241.7
E2f3	Endogenous	mRNA	162.24	135.08	148.41	137.78	156.57	164.01	141.19	149.73	174.71	173.02	190.21	114.84	158.86	175.25	156.62	224.3	149.93	192.26	165.17	183.72	204.92
Edn1	Endogenous	mRNA	108.63	223.61	330.11	327.75	228.07	115.51	115.42	155.76	130.11	119.78	146.56	36.09	221.41	241.08	136.5	227.75	234.44	318.8	202.27	167.02	227.22
Egf	Endogenous	mRNA	17.87	11.86	22.19	7.34	15.39	14.99	12.33	20.1	18.59	23.55	10.91	17.5	22.52	16.46	14	13.8	13.63	17.66	16.76	7.86	15.93
Egfr	Endogenous	mRNA	9.29	20.99	22.19	8.97	11.77	23.81	22.41	28.14	27.26	20.48	21.83	22.97	26.27	28.08	21	25.31	29.99	18.64	15.56	13.75	14.86
Egr1	Endogenous	mRNA	822.61	1023.12	1025.01	570.7	1035.35	601.38	973.77	739.6	976.41	1199.86	843.49	334.68	641.7	670.97	1242.5	1577.01	1349.41	634.66	1187.29	1169.13	1212.52
Eif2ak2	Endogenous	mRNA	437.39	437.18	461.88	382.37	409.98	468.23	444.86	427.08	457.23	405.41	589.35	354.37	387.77	368.89	381.5	475.06	487.97	627.8	467.97	546.25	645.55
Eif2b4	Endogenous	mRNA	377.36	419.84	417.49	424.76	399.12	453.24	500.89	445.17	509.27	558.98	453.71	495.46	589.17	475.39	411.25	517.62	494.78	465.94	427.28	441.13	479.91
Eif4ebp1	Endogenous	mRNA	6265.72	6302.09	6624.4	6336.41	6529.78	6656.66	7030.4	5981.15	8537.4	6532.66	6959.96	7537.96	7805.52	7762.14	6108.36	8401.5	7943.82	7834.71	7918.46	7947.16	6601.98
Elob	Endogenous	mRNA	9084.48	9454.5	9245.86	8218.1	9716.38	8869.96	11965.3	10183.6	13066.3	11781.5	10927.9	10823.5	10841.4	10136.2	6720.86	11710.8	13297.9	9260.98	10121.9	10268.7	10622.8
Eno1	Endogenous	mRNA	26027.7	32402.1	29603.1	32455	31533.9	33624.5	38127.1	36563.2	36161.9	32278.4	32852.4	34203	40942.7	37527.8	29853.2	35620.1	33333.2	40197.6	39399.6	39833.1	37201.7
Entpd1	Endogenous	mRNA	20.01	47.46	59.64	57.07	53.4	36.15	40.34	38.19	26.02	36.86	37.42	28.44	32.52	46.47	103.25	29.91	21.81	52.97	58.65	33.4	32.91
Eomes	Endogenous	mRNA	27.87	35.59	20.81	31.8	43.44	22.04	43.7	26.13	40.89	48.12	24.95	32.81	36.28	39.7	49	52.91	44.98	36.29	40.69	39.3	33.98
Epcam	Endogenous	mRNA	27.16	20.08	30.51	30.17	26.25	23.81	24.65	35.17	37.17	28.67	29.62	20.78	30.02	32.92	36.75	40.26	42.25	28.45	39.5	35.37	21.24
Epm2aip1	Endogenous	mRNA	374.5	327.65	255.21	249.48	299.56	300.69	324.96	312.52	389.08	743.26	283.76	407.96	379.02	313.7	407.75	417.54	481.15	370.79	284.85	479.44	465.05
Erbb2	Endogenous	mRNA	52.17	41.98	56.87	36.69	35.3	48.5	47.06	48.24	50.8	51.19	48.33	64.53	46.28	53.25	61.25	32.21	76.33	51.01	43.09	49.12	46.72
Ero1l	Endogenous	mRNA	1418.67	1405.53	1202.54	1500.13	1219.07	1422.33	1526.2	1511.37	1712.44	1737.33	1382.95	1315.75	1716.21	1952.88	1823.5	1801.31	1706.53	1969.71	2330.3	2189.91	1838.96
Esr1	Endogenous	mRNA	14.29	20.08	20.81	22.83	19.91	19.4	45.94	15.07	28.5	16.38	29.62	22.97	20.01	24.21	32.37	16.1	17.72	23.54	25.13	16.7	19.11
Exo1	Endogenous	mRNA	343.05	361.42	312.08	268.23	353.87	334.2	333.93	314.53	340.75	333.75	357.04	372.96	327.73	344.68	279.12	350.83	429.36	378.64	326.74	406.74	381.17
Ezh2	Endogenous	mRNA	2013.29	1911.16	1467.47	1503.39	1724.98	1797.98	1752.56	1647.03	1924.32	1943.11	1713.48	1894.33	2125.25	2145.55	1408.75	1863.42	2047.29	1736.25	1770.16	1795.95	1983.35
F2rl1	Endogenous	mRNA	564.61	538.48	470.2	459.01	559.31	539.66	595.02	581.84	540.25	581.5	492.69	667.17	531.63	569.31	421.75	595.83	644.72	550.3	610.4	589.48	637.05
Fadd	Endogenous	mRNA	53.6	63.89	73.51	58.7	76.02	57.32	54.91	64.31	59.48	58.35	63.92	56.87	73.8	74.55	85.75	66.72	58.61	65.72	73.01	56.98	75.38
Fam124b	Endogenous	mRNA	23.58	23.73	26.35	21.2	14.48	16.75	13.45	29.14	17.35	20.48	20.27	31.72	31.27	23.24	21	21.85	12.27	16.68	26.33	13.75	26.54
Fanca	Endogenous	mRNA	814.75	730.15	581.16	572.33	876.97	855.34	877.4	920.49	846.31	1220.33	756.18	1045.6	1006.96	784.25	780.5	814.38	1087.71	996.63	718.12	948.08	1181.73
Fap	Endogenous	mRNA	15.72	23.73	13.87	15.49	12.67	18.52	16.81	19.09	18.59	27.64	18.71	21.87	18.76	14.52	33.25	14.95	28.62	19.62	21.54	12.77	23.36
Fas	Endogenous	mRNA	212.26	282.93	270.47	278.01	195.49	170.19	177.05	194.95	185.87	135.14	188.65	171.71	193.89	238.18	234.5	274.91	154.02	222.67	174.74	188.63	183.68
Fasl	Endogenous	mRNA	21.44	31.94	45.77	32.61	25.34	22.04	33.62	43.21	49.56	48.12	37.42	37.19	31.27	38.73	114.62	56.36	32.71	44.14	74.21	42.25	53.09
Fbp1	Endogenous	mRNA	24.3	23.73	30.51	17.12	25.34	19.4	33.62	22.11	30.98	37.88	28.06	25.16	22.52	16.46	19.25	14.95	21.81	24.52	28.72	13.75	25.48
Fcer1a	Endogenous	mRNA	12.86	14.6	20.81	18.75	10.86	14.99	16.81	47.23	19.83	12.29	31.18	18.59	27.52	18.4	57.75	21.85	24.53	54.93	27.53	29.47	13.8
Fcgr1	Endogenous	mRNA	283.02	941.89	873.82	1209.89	1029.02	826.24	1092.55	1000.88	503.07	547.72	650.16	449.52	796.81	624.5	1326.5	884.55	696.52	942.68	1053.24	646.46	1116.96
Fcgr2b	Endogenous	mRNA	1014.15	1285.97	1701.87	2020.28	1879.74	1275.07	1326.74	1246.07	999.95	909.11	919.89	955.92	1310.93	1686.62	1513.75	1284.84	1202.2	1684.26	1995.18	956.92	1470.53
Fcgr3	Endogenous	mRNA	90.05	209.92	298.21	335.9	308.61	170.19	158	212.03	123.91	82.93	130.97	97.34	215.15	214.94	511.87	236.95	140.39	225.61	325.55	182.74	209.17
Fcgr4	Endogenous	mRNA	215.12	785.82	1048.59	1152.82	952.09	799.79	513.22	643.13	498.12	308.15	555.05	344.52	991.95	1026.3	2827.99	828.19	515.23	660.17	1384.77	801.69	668.9
Fcgrt	Endogenous	mRNA	661.09	704.59	484.07	569.89	640.76	628.72	981.61	731.57	690.18	636.78	725	643.11	551.64	517.02	427	759.17	793.29	820.06	695.38	668.08	726.24
Fcnb	Endogenous	mRNA	5.72	13.69	13.87	8.15	2.72	6.17	11.21	8.04	11.15	7.17	4.68	5.47	16.26	1	5.25	6.9	6.82	4.9	10.77	2.95	7.43
Fcrlb	Endogenous	mRNA	22.16	23.73	31.9	39.95	27.15	29.98	30.26	29.14	35.93	31.74	21.83	17.5	23.77	36.79	24.5	39.11	20.45	46.1	65.83	24.56	21.24
Fgf13	Endogenous	mRNA	15.01	13.69	19.42	13.86	13.58	9.7	11.21	14.07	3.72	12.29	12.47	10.94	18.76	17.43	15.75	19.55	12.27	12.75	16.76	16.7	14.86
Fgf18	Endogenous	mRNA	50.74	54.76	56.87	44.03	44.35	32.63	43.7	42.21	73.11	77.81	81.07	42.66	67.55	49.38	62.12	60.96	70.88	56.89	63.43	40.28	53.09
Fgf9	Endogenous	mRNA	14.29	20.99	30.51	17.12	19.01	13.23	31.38	25.12	23.54	28.67	26.51	25.16	20.01	22.27	17.5	20.7	24.53	18.64	26.33	11.79	15.93
Fgfr1	Endogenous	mRNA	413.09	346.82	282.95	287.8	352.06	333.32	442.62	400.95	379.16	497.55	375.75	387.18	406.54	427.95	468.12	529.12	527.5	576.79	412.92	590.46	597.77
Flnb	Endogenous	mRNA	1784.59	2015.21	1836.41	2017.84	1763.9	2142.76	2006.92	2277.1	2068.06	1945.16	1817.95	2070.42	2563.06	2792.32	2743.99	2360.33	2219.03	2671.08	2782.71	2721.43	2640.58
Flt1	Endogenous	mRNA	104.35	149.68	253.82	158.17	158.38	141.09	174.81	163.8	141.26	179.16	120.05	111.56	130.09	149.1	287.87	167.94	214	184.42	169.95	251.51	149.71
Fosl1	Endogenous	mRNA	6654.52	5806.5	6477.38	5224.36	6117.99	4726.41	4142.71	4766.23	6350.39	4806.59	5722.01	4510.53	6211.9	6822.01	4933.24	7909.19	6246.83	5254.85	5529.52	5977.32	5945.81
Foxp3	Endogenous	mRNA	35.02	25.56	44.38	45.66	37.11	25.57	38.1	31.15	43.37	43	26.51	25.16	57.54	47.44	34.12	55.21	34.08	36.29	67.02	47.16	52.03
Fpr1	Endogenous	mRNA	37.16	46.55	38.84	52.99	54.3	40.56	58.27	56.27	69.39	43	51.45	57.97	52.54	41.63	126	49.46	47.71	42.18	28.72	31.44	50.96
Fpr3	Endogenous	mRNA	5.72	11.86	4.16	5.71	16.29	6.17	10.09	7.03	4.96	8.19	18.71	9.84	11.26	7.75	3.5	11.5	9.54	4.9	7.18	7.86	7.43
Fstl3	Endogenous	mRNA	305.17	314.88	342.59	306.55	353.87	432.08	488.56	468.28	467.14	534.41	489.57	410.15	491.6	407.62	308	480.81	502.96	423.76	406.93	440.14	503.27
Fut4	Endogenous	mRNA	68.61	62.98	104.03	79.08	78.74	75.83	60.51	79.39	75.59	84.97	70.16	95.15	117.58	75.52	78.75	65.56	70.88	79.46	78.99	50.11	70.08
Fyn	Endogenous	mRNA	272.3	219.96	375.88	361.17	243.45	219.57	119.9	166.81	152.41	141.28	118.49	224.21	342.74	428.92	655.37	202.45	159.48	220.71	335.12	193.55	140.15
Fzd8	Endogenous	mRNA	35.73	34.68	51.32	29.35	21.72	30.86	38.1	43.21	47.09	35.83	31.18	39.37	46.28	47.44	31.5	41.41	36.8	34.33	44.28	14.74	38.22
Fzd9	Endogenous	mRNA	10.01	10.04	12.48	6.52	17.2	4.41	12.33	7.03	16.11	18.43	14.03	10.94	7.51	9.68	10.5	10.35	4.09	10.79	11.97	4.91	7.43
Gas1	Endogenous	mRNA	27.16	36.51	34.68	34.24	23.53	22.93	54.91	42.21	32.22	24.57	26.51	24.06	26.27	30.98	62.12	32.21	70.88	16.68	39.5	41.26	31.85
Gata3	Endogenous	mRNA	27.87	32.86	49.93	48.92	26.25	22.93	29.13	32.16	42.13	45.05	26.51	21.87	36.28	33.89	64.75	39.11	36.8	43.16	76.6	44.21	54.15
Gbp2	Endogenous	mRNA	893.37	1628.23	3093.05	2796.44	1119.52	1760.94	899.81	1405.85	1506.75	474	1510.8	667.17	2091.48	2608.36	7116.36	1980.75	763.3	4005.15	3437.4	3903.33	1185.98
Gbp2b	Endogenous	mRNA	8.58	6.39	16.64	13.86	9.96	12.35	8.96	11.05	12.39	9.21	12.47	6.56	23.77	30.01	161	8.05	8.18	9.81	16.76	20.63	2.12
Gbp3	Endogenous	mRNA	230.13	389.72	477.13	468.79	279.65	433.84	366.42	392.92	314.73	267.2	455.27	195.78	410.29	402.78	974.75	432.5	327.13	731.78	646.31	633.69	433.19
Ghr	Endogenous	mRNA	10.01	19.17	15.26	12.23	18.1	20.28	28.01	19.09	24.78	34.81	15.59	21.87	25.02	20.33	16.62	27.61	23.17	12.75	10.77	9.82	28.67
Gimap4	Endogenous	mRNA	102.92	123.21	216.37	175.29	113.13	149.02	161.36	160.78	214.36	185.3	129.41	137.81	190.13	214.94	243.25	223.15	162.2	244.25	319.56	209.27	238.89
Gimap6	Endogenous	mRNA	93.62	94.01	190.02	108.43	124.89	127.86	160.24	112.55	149.93	170.97	107.58	75.47	140.1	161.69	276.5	177.14	185.37	152.04	199.88	184.7	208.1
Gli1	Endogenous	mRNA	44.31	31.94	40.22	30.98	37.11	36.15	30.26	32.16	30.98	39.93	31.18	47.03	47.53	20.33	28	28.76	40.89	38.26	37.1	25.54	30.79
Gls	Endogenous	mRNA	396.66	508.37	470.2	537.27	486.91	501.74	365.3	435.12	345.71	340.91	420.97	411.24	464.08	582.86	589.75	579.73	432.08	478.69	493.11	410.67	509.64
Glud1	Endogenous	mRNA	8038.17	9838.74	7412.23	9250.25	9136.26	8888.47	9312.98	9965.57	7849.7	7714.09	8685.91	10646.3	10857.7	10328.9	7692.11	9427.53	9087.41	11005.1	9773.61	9423.8	9274.41
Glul	Endogenous	mRNA	829.05	945.54	1115.16	1007.7	1219.98	905.6	818.01	950.63	758.33	694.11	865.32	858.58	926.91	1163.79	1377.25	1040.98	1048.18	1127.09	1266.28	1260.5	933.28
Gm5150	Endogenous	mRNA	38.59	69.36	63.8	75.82	77.83	44.09	79.56	55.27	45.85	63.47	37.42	49.22	82.56	62.93	125.12	41.41	58.61	67.68	98.14	43.23	64.77
Gmip	Endogenous	mRNA	271.58	203.53	177.54	177.73	196.39	223.09	182.65	209.02	225.52	266.18	183.98	248.28	198.89	219.78	224.87	172.54	203.09	233.46	190.3	197.48	212.35
Gng4	Endogenous	mRNA	16.44	15.52	23.58	17.94	15.39	13.23	13.45	10.05	17.35	11.26	14.03	10.94	15.01	17.43	8.75	19.55	8.18	21.58	17.95	10.81	15.93
Got1	Endogenous	mRNA	2041.17	2374.81	2778.2	2621.96	2553.09	2310.3	2368.86	2442.91	2686.37	2312.69	2245.15	2201.67	2710.67	2953.04	2580.37	3063.14	2877.38	2703.45	3425.43	2810.83	2881.6
Got2	Endogenous	mRNA	4233.85	4685.72	4578.55	4666.71	4645.51	4436.3	3911.88	3878.91	4028.31	2844.03	3977.34	5016.92	4882.2	5585.6	4483.49	4297.37	4455.79	5134.2	4931.09	5026.29	3973.08
Gpc4	Endogenous	mRNA	28.59	36.51	38.84	30.17	30.77	33.51	40.34	45.22	48.32	39.93	48.33	40.47	32.52	30.01	46.37	27.61	31.35	21.58	32.32	21.61	33.98
Gpr160	Endogenous	mRNA	27.16	31.94	43	39.95	35.3	31.74	34.74	43.21	53.28	38.9	49.89	36.09	26.27	35.82	39.37	42.56	53.16	34.33	37.1	30.46	30.79
Gpsm3	Endogenous	mRNA	473.13	480.07	557.58	502.22	500.48	600.5	543.47	535.61	517.94	482.19	389.78	529.36	612.93	594.48	637.87	571.68	595.65	527.74	623.57	448.99	561.67
Gzma	Endogenous	mRNA	105.77	118.65	199.73	126.37	216.3	130.51	476.24	231.13	250.3	260.04	268.17	160.78	190.13	128.77	97.12	224.3	253.53	515.97	307.59	191.58	475.67
Gzmb	Endogenous	mRNA	50.74	104.96	151.18	114.14	84.17	101.41	94.13	105.51	141.26	96.23	85.75	63.44	103.82	129.74	140.87	148.38	115.86	209.92	324.35	149.33	147.58
Gzme	Endogenous	mRNA	22.16	24.64	26.35	34.24	21.72	28.22	40.34	29.14	29.74	35.83	38.98	25.16	40.03	30.01	18.37	32.21	29.99	65.72	21.54	20.63	20.17
H2-Aa	Endogenous	mRNA	2036.88	5186.79	10169.6	11720.6	6614.85	4666.45	3465.89	4031.65	2934.19	1921.61	2472.78	1861.52	8076.97	9654.02	22426.2	4540.07	3015.05	4275.88	8372.08	5747.42	3408.23
H2-Ab1	Endogenous	mRNA	3313.32	7301.48	14022.8	15195.3	9602.35	7503.18	5356.28	6089.68	4773.01	3083.59	3693.58	3100.71	12605.2	14855.2	27745.3	6725.57	4676.6	5885.59	11530.6	7080.63	4927.59
H2-D1	Endogenous	mRNA	39160.2	43693	39335.8	41023.6	39942.5	42539.5	45023	40568.7	41918.8	32646.9	38862.9	45700.2	46420.3	48615.8	46769.5	44523.1	43076.3	51137	47686.7	47966.9	41916.9
H2-DMa	Endogenous	mRNA	197.26	312.14	572.84	608.2	288.7	431.2	228.59	249.21	276.32	190.42	179.3	298.59	510.36	586.74	1122.62	294.47	205.82	321.75	388.98	451.93	212.35
H2-DMb1	Endogenous	mRNA	244.43	368.72	543.71	575.59	317.66	399.45	197.22	230.12	241.62	154.59	227.63	286.56	491.6	593.51	1007.12	302.52	190.83	363.93	399.75	474.53	205.98
H2-DMb2	Endogenous	mRNA	45.03	60.24	169.22	90.5	64.26	52.03	95.25	37.18	40.89	49.14	26.51	31.72	51.29	50.35	54.25	56.36	81.78	36.29	58.65	32.42	57.33
H2-Eb1	Endogenous	mRNA	1185.68	2362.03	4367.72	4567.24	3241.81	2506.06	1823.15	2044.97	1852.45	1370.82	1124.13	1078.41	4089.14	4877.84	9690.6	2234.95	1598.85	1725.46	3595.39	2530.83	1721.1
H2-K1	Endogenous	mRNA	9554.75	13416.5	12343.1	12801.6	13166.4	13732.2	14848.5	12724	13006.8	12337.4	10394.7	12248.6	15210.8	13233.5	16914.6	13196.9	12071.1	13614.4	14130.2	12515.6	13941.9
H2-M3	Endogenous	mRNA	400.23	499.24	484.07	481.02	499.58	529.08	421.33	371.81	420.05	355.25	333.65	549.05	520.37	530.58	665	411.79	398.01	495.37	464.38	504	420.45
H2-Ob	Endogenous	mRNA	17.15	27.38	77.67	27.72	13.58	24.69	43.7	17.08	22.3	17.4	18.71	20.78	20.01	26.14	25.37	21.85	38.17	17.66	20.35	18.67	16.99
H2-Pa	Endogenous	mRNA	6.43	9.13	13.87	9.78	12.67	7.05	5.6	12.06	9.91	10.24	14.03	14.22	8.76	4.84	7.87	12.65	8.18	7.85	7.18	7.86	7.43
H2-Q1	Endogenous	mRNA	7.86	10.04	11.1	9.78	12.67	7.94	12.33	12.06	11.15	13.31	14.03	8.75	6.25	10.65	14	26.46	10.9	10.79	11.97	9.82	14.86
H2-Q10	Endogenous	mRNA	22.87	35.59	44.38	33.43	31.68	34.39	42.58	52.25	37.17	34.81	49.89	31.72	36.28	36.79	29.75	31.06	44.98	33.35	57.45	21.61	54.15
H2-Q2	Endogenous	mRNA	20.01	29.21	43	30.98	20.82	15.87	41.46	35.17	44.61	34.81	48.33	28.44	18.76	21.3	22.75	27.61	25.9	17.66	41.89	14.74	26.54
H2-T23	Endogenous	mRNA	290.17	868.88	987.56	1115.31	909.55	731.01	838.18	837.08	516.7	459.67	456.83	416.71	970.69	761.98	1589	735.02	613.37	810.25	1127.45	616.99	767.65
H2afx	Endogenous	mRNA	3734.28	3530.26	3711.66	3489.43	3796.59	3579.2	3257.47	2788.59	3656.58	3495.14	2970.14	3784.29	4000.33	4080.04	3541.12	3692.33	3760.64	3663.78	3642.06	3905.3	2896.46
Havcr2	Endogenous	mRNA	61.46	108.61	178.93	119.85	186.44	97.88	90.77	130.64	118.95	72.69	63.92	47.03	107.58	140.39	235.37	179.44	102.23	97.11	166.36	114.95	149.71
Hc	Endogenous	mRNA	18.58	14.6	15.26	13.04	11.77	11.46	21.29	41.2	34.69	36.86	24.95	12.03	12.51	13.55	10.5	27.61	38.17	30.41	33.51	15.72	40.35
Hck	Endogenous	mRNA	127.22	307.57	321.79	451.67	387.35	271.59	304.79	256.25	235.43	156.64	183.98	179.37	308.97	322.41	590.62	291.02	227.63	268.78	302.81	205.34	258.01
Hdac11	Endogenous	mRNA	95.77	75.75	58.25	54.62	57.92	72.31	115.42	78.38	85.5	80.88	71.72	84.22	58.79	70.68	33.25	88.57	107.68	64.74	67.02	91.37	87.06
Hdac3	Endogenous	mRNA	245.85	242.77	264.92	273.12	282.37	245.14	287.98	265.29	283.75	218.06	302.47	267.96	252.68	267.23	231	285.26	317.59	287.41	318.37	244.63	234.65
Hdac4	Endogenous	mRNA	162.24	127.78	141.48	127.18	133.04	141.09	146.79	162.79	164.8	171.99	173.06	156.4	196.39	164.6	190.75	166.79	141.76	166.76	156.79	197.48	183.68
Hdac5	Endogenous	mRNA	583.91	461.82	484.07	503.03	513.15	471.76	400.04	395.93	486.97	442.27	459.94	458.27	466.58	593.51	372.75	500.36	513.87	498.31	590.05	497.13	460.8
Hdc	Endogenous	mRNA	157.95	146.94	123.44	146.75	137.56	106.7	135.59	139.68	140.02	83.95	110.7	57.97	120.08	152.98	123.37	140.33	117.22	161.85	130.46	121.83	119.98
Hells	Endogenous	mRNA	531.02	524.79	386.98	457.38	451.61	471.76	434.78	440.15	433.68	437.15	417.85	532.64	507.86	471.52	442.75	412.94	504.33	468.89	402.15	437.2	516.01
Herc6	Endogenous	mRNA	484.56	680.86	586.71	597.61	552.07	764.51	560.28	576.81	455.99	449.43	667.31	581.86	629.2	566.4	624.75	469.31	479.79	772.97	596.04	588.5	664.66
Hes1	Endogenous	mRNA	3321.18	2447.82	2976.54	1657.48	3065.33	2100.43	3413.23	2643.89	3759.43	4089.95	3207.13	2499.16	2380.43	2820.4	2019.49	4529.72	5082.79	2920.24	2755.19	3919.05	3594.03
Hey1	Endogenous	mRNA	15.72	28.29	24.97	21.2	21.72	14.11	28.01	25.12	22.3	28.67	28.06	25.16	30.02	21.3	33.25	28.76	39.53	14.71	20.35	20.63	29.73
Hif1a	Endogenous	mRNA	528.16	648.92	535.39	573.15	522.2	544.07	617.43	673.28	539.01	673.64	541.02	685.77	729.27	615.78	750.75	638.39	667.89	669.98	623.57	660.22	750.66
Hk1	Endogenous	mRNA	425.96	397.93	459.1	432.92	394.59	454.12	363.06	371.81	463.42	435.1	383.55	417.8	475.34	620.62	445.37	379.59	447.08	514.99	570.91	523.65	416.21
Hk2	Endogenous	mRNA	313.04	425.31	464.65	322.04	441.65	482.34	642.08	696.39	664.16	1008.41	450.59	494.36	1065.75	640.96	451.5	685.55	830.09	678.81	537.39	753.55	1002.29
Hmga1	Endogenous	mRNA	4557.6	4153.63	4180.47	4223.19	4361.33	4393.97	5089.58	4709.96	5704.82	4993.94	4671.15	5366.91	5427.59	5324.19	4868.49	5432.68	5088.24	5606.03	5512.76	5442.86	4940.33
Hmgb1	Endogenous	mRNA	2381.36	3052.02	2377.35	2824.97	2820.07	2720.33	3060.25	2682.07	2607.07	2148.89	2786.17	3151.02	2820.75	2725.51	2839.37	2789.38	2859.66	3365.58	3083.13	2997.5	2564.13
Hnf1a	Endogenous	mRNA	3.57	10.04	9.71	8.97	9.96	9.7	8.96	9.04	9.91	9.21	10.91	6.56	5	9.68	5.25	8.05	8.18	9.81	8.38	4.91	12.74
Hras	Endogenous	mRNA	31.45	29.21	30.51	33.43	34.39	28.22	31.38	31.15	55.76	44.02	34.3	51.41	36.28	33.89	47.25	51.76	27.26	42.18	31.12	47.16	56.27
Hsd11b1	Endogenous	mRNA	28.59	26.47	55.48	38.32	31.68	37.04	58.27	38.19	45.85	26.62	15.59	33.91	40.03	42.6	33.25	41.41	32.71	39.24	55.06	25.54	32.91
Icam1	Endogenous	mRNA	889.08	1296.01	1109.61	1211.52	826.29	695.73	480.72	538.63	574.94	385.96	516.07	527.18	765.54	851.06	1210.12	859.24	527.5	780.82	584.07	708.36	633.87
Icam2	Endogenous	mRNA	58.6	92.18	105.41	105.99	92.31	91.71	99.73	83.41	91.69	98.28	74.84	73.28	103.82	83.27	136.5	108.12	118.58	98.09	93.36	77.61	77.51
Icam5	Endogenous	mRNA	18.58	14.6	15.26	15.49	12.67	15.87	16.81	20.1	22.3	23.55	12.47	14.22	7.51	16.46	27.12	13.8	23.17	18.64	20.35	12.77	18.05
Icos	Endogenous	mRNA	72.18	114.09	255.21	160.61	119.46	104.05	107.57	159.78	205.69	151.52	123.17	68.9	227.66	192.67	524.12	289.87	125.4	185.4	448.82	230.88	222.97
Icosl	Endogenous	mRNA	291.6	293.88	237.18	231.54	240.74	243.37	281.26	249.21	296.14	311.23	293.12	237.34	205.15	260.45	196.87	355.43	365.3	303.11	245.36	312.42	312.16
Id4	Endogenous	mRNA	7.86	11.86	19.42	11.41	8.15	8.82	11.21	8.04	14.87	24.57	10.91	9.84	6.25	16.46	24.5	14.95	10.9	9.81	17.95	15.72	8.49
Ido1	Endogenous	mRNA	22.16	9.13	36.06	14.68	15.39	15.87	19.05	22.11	28.5	25.59	26.51	16.41	20.01	16.46	18.37	17.25	17.72	19.62	32.32	15.72	13.8
Ier3	Endogenous	mRNA	8845.77	7953.14	7847.75	7006.58	6815.77	6821.55	8805.36	4977.26	9635.24	8682.57	7139.26	8583.56	7380.22	7499.76	6446.11	10356.9	10090.6	6117.09	7343.97	7071.78	8443.05
Ifi203	Endogenous	mRNA	162.24	181.62	163.67	189.15	130.32	168.42	197.22	224.09	213.13	218.06	201.13	120.31	180.13	148.14	241.5	204.75	216.72	285.45	266.9	181.76	256.94
Ifi27	Endogenous	mRNA	2324.19	2593.85	2878.06	3025.53	2988.4	2809.39	2363.26	2616.75	2878.43	2639.27	2165.63	3854.29	3700.12	3521.38	2809.62	3086.15	2716.55	2711.3	2667.81	2281.28	2186.15
Ifi35	Endogenous	mRNA	2196.97	2562.82	2536.86	2462.98	2420.95	2857.01	3497.27	3010.67	3019.69	2195.98	3271.06	2323.07	2694.41	2423.43	2121.87	2688.16	3260.4	3688.31	3035.25	2750.9	2909.2
Ifih1	Endogenous	mRNA	601.77	755.7	643.58	741.1	746.65	783.03	800.08	822.01	623.27	633.71	770.21	547.96	669.22	618.69	567.87	799.43	849.18	889.71	769.58	729.97	1000.17
Ifit1	Endogenous	mRNA	314.47	399.76	373.11	338.34	385.54	436.49	510.98	458.23	338.27	321.46	617.42	354.37	283.95	218.82	208.25	464.7	347.58	482.62	456.01	346.81	497.96
Ifit2	Endogenous	mRNA	469.55	789.47	631.09	553.58	670.63	853.58	896.45	639.12	629.46	897.84	555.05	623.42	581.66	423.11	544.25	759.17	770.12	608.18	715.73	462.74	1050.07
Ifit3	Endogenous	mRNA	518.87	735.62	660.22	629.4	858.87	850.05	1147.45	921.49	812.85	778.06	720.32	543.58	687.99	406.65	309.75	852.34	966.4	639.57	816.26	404.78	1291.09
Ifitm1	Endogenous	mRNA	70.04	68.45	92.93	129.63	100.46	82.01	174.81	155.76	140.02	95.21	132.53	56.87	102.57	94.88	141.75	234.65	143.12	194.22	250.14	123.79	142.27
Ifitm2	Endogenous	mRNA	5864.78	6616.05	5966.95	6108.95	6936.14	6519.1	7628.77	6321.81	7192.98	6980.05	6334.75	7159.53	6973.68	6365.01	4749.49	7349.01	7957.45	5722.76	6276.37	5595.14	7119.05
Ifna1	Endogenous	mRNA	20.73	26.47	33.29	23.64	28.06	22.04	39.22	31.15	28.5	26.62	40.54	22.97	31.27	28.08	22.75	26.46	31.35	22.56	29.92	15.72	19.11
Ifnar1	Endogenous	mRNA	955.55	1085.18	1063.84	1149.56	1191.02	890.61	1130.65	1219.95	1177.15	1153.79	1061.77	915.45	1095.78	1101.82	1138.37	1406.77	1363.04	1419.41	1322.54	1141.62	1431.24
Ifng	Endogenous	mRNA	24.3	22.82	55.48	44.03	18.1	29.1	16.81	28.14	35.93	39.93	18.71	20.78	32.52	43.57	34.12	40.26	25.9	55.91	74.21	41.26	20.17
Ifngr1	Endogenous	mRNA	593.2	687.25	671.32	688.92	658.86	583.75	676.82	694.38	691.42	617.33	690.69	546.86	675.48	743.59	903.87	841.99	766.03	760.22	961.08	730.95	768.71
Ifngr2	Endogenous	mRNA	898.37	1078.79	1108.23	1231.08	1011.82	736.3	1009.62	938.57	1050.76	828.23	1174.03	706.55	815.58	947.88	1055.25	1237.68	1037.28	1182.02	1081.97	1026.68	1011.85
Igf2r	Endogenous	mRNA	318.04	267.42	316.24	291.06	290.51	276.88	378.75	354.73	401.47	492.43	380.43	311.71	267.69	305.95	367.5	332.43	455.26	514.99	366.24	470.6	473.54
Ihh	Endogenous	mRNA	15.72	24.64	23.58	22.01	20.82	22.04	29.13	37.18	24.78	28.67	40.54	24.06	27.52	22.27	26.25	33.36	29.99	24.52	21.54	22.6	22.3
Ikbkb	Endogenous	mRNA	493.85	340.43	359.24	349.76	333.05	392.4	329.44	327.6	380.4	365.48	330.54	416.71	365.26	488.95	399.87	342.78	408.91	417.88	338.71	410.67	428.95
Ikbkg	Endogenous	mRNA	859.78	934.59	787.83	888.66	801.86	1034.34	1047.72	1116.44	1201.93	1544.87	898.06	1222.79	1282.16	974.02	998.37	1144.51	1262.18	1390.96	1047.26	1056.15	1378.15
Ikzf1	Endogenous	mRNA	47.88	80.32	99.87	99.47	78.74	76.72	75.08	72.35	78.06	71.66	60.81	44.84	86.31	84.23	178.5	104.67	84.51	103.98	123.28	90.39	97.68
Ikzf2	Endogenous	mRNA	58.6	60.24	77.67	92.13	48.87	44.09	38.1	53.26	42.13	45.05	46.77	29.53	83.81	63.9	128.62	69.02	49.07	65.72	117.29	64.84	61.58
Ikzf3	Endogenous	mRNA	32.16	46.55	77.67	48.92	41.63	35.27	60.51	49.24	57	48.12	45.21	31.72	62.54	69.71	168	86.27	46.34	72.59	102.93	77.61	57.33
Il10	Endogenous	mRNA	117.92	217.22	273.24	383.19	283.27	92.59	144.55	189.93	97.89	100.33	185.54	66.72	157.61	221.72	140.87	257.66	237.17	129.48	244.16	80.56	200.67
Il10ra	Endogenous	mRNA	255.15	292.97	396.69	278.83	403.64	288.35	316	281.37	406.42	312.25	246.34	164.06	236.42	311.76	380.62	423.3	392.56	220.71	511.06	240.7	401.34
Il11	Endogenous	mRNA	15.01	20.08	33.29	20.38	17.2	18.52	21.29	17.08	30.98	26.62	38.98	28.44	21.27	30.01	19.25	24.16	19.08	12.75	22.74	14.74	26.54
Il11ra1	Endogenous	mRNA	11.44	15.52	13.87	14.68	21.72	17.64	21.29	21.1	17.35	20.48	15.59	14.22	22.52	15.49	28.87	16.1	12.27	9.81	22.74	16.7	13.8
Il12rb2	Endogenous	mRNA	21.44	41.98	55.48	66.04	31.68	29.98	25.77	39.19	49.56	34.81	37.42	14.22	35.02	56.16	96.25	52.91	27.26	109.86	88.57	60.91	54.15
Il15	Endogenous	mRNA	33.59	48.37	49.93	38.32	29.87	33.51	56.03	44.22	43.37	38.9	43.66	29.53	31.27	43.57	34.12	47.16	40.89	37.28	46.68	30.46	50.96
Il16	Endogenous	mRNA	23.58	50.2	74.9	57.89	64.26	44.97	44.82	52.25	43.37	43	32.74	49.22	51.29	62.93	107.62	78.22	44.98	58.86	89.76	37.33	62.64
Il17a	Endogenous	mRNA	9.29	17.34	19.42	9.78	12.67	7.94	15.69	14.07	14.87	18.43	23.39	18.59	12.51	13.55	11.37	16.1	8.18	11.77	15.56	12.77	12.74
Il18	Endogenous	mRNA	82.9	140.55	116.51	189.15	153.85	111.99	117.66	136.67	135.06	89.07	116.93	110.47	117.58	115.22	140	136.88	81.78	122.62	132.85	85.47	150.77
Il18bp	Endogenous	mRNA	168.67	251.9	429.98	379.92	273.32	314.8	179.29	225.1	226.76	223.18	218.28	181.56	369.01	370.82	921.37	269.16	207.18	349.21	460.79	369.41	312.16
Il18r1	Endogenous	mRNA	40.02	53.85	77.67	79.9	50.68	40.56	45.94	56.27	96.65	95.21	62.37	42.66	71.3	90.04	71.75	77.07	53.16	85.34	95.75	64.84	65.83
Il1a	Endogenous	mRNA	102.2	141.47	183.09	350.57	134.85	63.49	64.99	123.6	106.56	88.04	116.93	106.09	152.61	120.06	93.62	159.89	92.69	356.08	101.73	68.77	109.36
Il1b	Endogenous	mRNA	1104.2	2248.86	1853.06	3457.63	2659.88	1309.46	2466.35	2222.83	1737.22	1316.56	1808.59	1014.98	2056.46	1682.75	861	2915.91	1346.69	1952.06	1863.52	669.06	2601.29
Il1r2	Endogenous	mRNA	181.53	184.36	246.89	394.6	242.55	126.98	259.97	280.37	205.69	166.87	145	137.81	263.94	275.94	195.12	241.55	261.7	260.93	345.89	101.19	238.89
Il1rn	Endogenous	mRNA	463.12	1305.14	1202.54	2137.68	1085.13	520.26	961.44	1114.43	571.23	523.15	686.02	282.18	884.38	683.56	1206.62	1403.32	587.47	1557.72	1237.56	735.87	1231.63
Il2	Endogenous	mRNA	5	6.39	6.94	7.34	8.15	7.05	12.33	8.04	7.43	12.29	14.03	5.47	5	8.71	6.12	12.65	5.45	3.92	8.38	5.89	6.37
Il21r	Endogenous	mRNA	72.18	97.66	255.21	259.26	134.85	62.61	90.77	100.49	126.39	98.28	84.19	35	167.62	183.96	403.37	155.29	92.69	149.1	254.93	154.25	105.11
Il22ra1	Endogenous	mRNA	22.16	20.08	20.81	17.12	14.48	20.28	29.13	31.15	33.46	21.5	29.62	30.62	30.02	14.52	16.62	35.66	20.45	11.77	8.38	16.7	14.86
Il23r	Endogenous	mRNA	9.29	12.78	15.26	13.04	11.77	13.23	16.81	14.07	21.06	15.36	17.15	16.41	16.26	12.59	31.5	13.8	14.99	20.6	20.35	7.86	20.17
Il24	Endogenous	mRNA	30.02	40.16	45.77	43.21	28.96	38.8	43.7	42.21	52.04	39.93	45.21	45.94	47.53	46.47	49.87	54.06	43.62	42.18	47.87	50.11	49.9
Il2ra	Endogenous	mRNA	76.47	58.41	145.64	129.63	74.21	48.5	80.68	109.53	102.85	67.57	67.04	29.53	71.3	57.12	84.87	113.88	81.78	197.17	150.81	83.51	108.3
Il2rb	Endogenous	mRNA	286.59	387.89	939.01	793.27	416.31	338.61	386.59	549.68	744.7	517	405.37	236.24	1005.71	871.39	2042.24	800.58	408.91	915.21	1417.09	1063.03	533
Il2rg	Endogenous	mRNA	1309.32	1828.11	1792.03	1800.15	1620.91	1722.14	1544.13	1722.4	1418.77	1405.63	1261.34	1724.81	1976.4	1819.27	2056.24	1690.88	1669.73	2397.4	1997.57	1593.56	1865.5
Il33	Endogenous	mRNA	40.74	55.67	37.45	54.62	50.68	37.92	42.58	48.24	48.32	38.9	42.1	87.5	61.29	45.51	61.25	24.16	43.62	38.26	39.5	31.44	29.73
Il34	Endogenous	mRNA	540.31	670.82	755.92	818.55	805.48	829.77	568.12	798.89	815.33	659.31	633.01	924.2	1006.96	1086.33	1089.37	701.66	756.49	1059.41	961.08	662.18	676.34
Il4	Endogenous	mRNA	10.72	14.6	26.35	13.04	11.77	14.11	12.33	12.06	21.06	13.31	10.91	6.56	12.51	21.3	9.62	11.5	13.63	17.66	15.56	15.72	14.86
Il6	Endogenous	mRNA	92.91	128.69	201.12	126.37	114.03	54.67	114.3	105.51	114	120.8	73.28	68.9	81.31	121.03	215.25	192.09	231.72	70.63	114.9	133.62	153.95
Il6ra	Endogenous	mRNA	2135.51	1668.39	1624.2	1595.52	1891.51	1830.6	1399.58	1386.76	1351.86	1441.46	1421.93	1414.19	1691.2	1811.52	1681.75	1719.64	1688.81	1816.69	1588.24	2004.23	1837.89
Il7r	Endogenous	mRNA	110.06	196.23	287.11	304.92	311.33	155.2	183.77	295.44	226.76	157.66	219.84	73.28	190.13	179.12	351.75	284.11	159.48	378.64	390.18	219.09	365.24
Inhba	Endogenous	mRNA	33.59	62.98	112.35	134.52	71.5	41.44	54.91	69.34	50.8	44.02	65.48	18.59	46.28	40.66	57.75	75.92	50.43	146.16	86.17	50.11	59.46
Irf1	Endogenous	mRNA	3533.45	3899.9	4743.6	3708.74	2372.08	2582.77	1776.09	1958.55	4138.59	2551.23	3074.6	1550.9	3685.11	5053.09	5064.49	3874.07	3040.95	4795.78	3983.17	4653.94	2898.58
Irf2	Endogenous	mRNA	491.71	450.87	495.17	423.95	486	493.8	468.39	529.58	556.36	481.17	551.93	541.39	472.83	531.55	393.75	504.96	582.02	521.86	588.86	532.5	542.56
Irf3	Endogenous	mRNA	1059.89	840.58	821.11	732.94	933.08	881.79	1179.95	1064.19	1312.21	1132.29	1130.37	1082.79	870.62	950.78	702.62	1107.7	1298.98	1159.46	894.06	1001.13	1154.12
Irf4	Endogenous	mRNA	25.73	23.73	59.64	35.87	20.82	21.16	33.62	33.16	33.46	29.69	43.66	25.16	35.02	24.21	32.37	36.81	40.89	23.54	50.27	24.56	31.85
Irf5	Endogenous	mRNA	207.98	364.16	427.2	502.22	484.19	286.58	361.94	334.63	283.75	227.28	307.15	202.34	401.53	331.13	572.25	410.64	275.33	327.63	421.3	274.11	402.4
Irf7	Endogenous	mRNA	848.34	1792.51	1403.66	1724.33	1715.93	1392.35	2118.98	1619.9	945.43	895.8	1150.64	874.98	1173.33	947.88	1054.37	1216.97	1414.84	1554.78	1565.5	882.25	1783.74
Irf8	Endogenous	mRNA	281.59	325.83	471.59	476.94	385.54	271.59	284.62	295.44	363.06	289.73	198.01	292.02	394.03	401.81	693.87	376.13	306.68	410.03	544.57	373.34	333.39
Irf9	Endogenous	mRNA	1165.67	1239.43	1307.96	1122.65	1190.11	1329.74	1482.5	1321.44	1670.31	1525.41	1724.4	1154.97	1189.59	1241.25	1343.12	1812.81	1642.47	1774.51	1646.89	1978.68	1812.41
Isg15	Endogenous	mRNA	3577.76	5306.35	4824.05	4224.82	4687.14	4828.7	7317.26	5537.99	5361.59	4329.51	6412.7	3727.42	3892.75	2959.82	2972.37	5949.14	6317.71	5602.1	5487.63	4425.02	6343.97
Itga1	Endogenous	mRNA	30.73	24.64	15.26	19.57	15.39	27.34	23.53	24.12	18.59	19.45	20.27	20.78	32.52	22.27	27.12	16.1	23.17	26.49	32.32	28.49	15.93
Itga2	Endogenous	mRNA	13.58	19.17	30.51	17.94	21.72	17.64	23.53	21.1	26.02	26.62	15.59	15.31	20.01	18.4	21	23.01	35.44	15.69	14.36	23.58	27.61
Itga4	Endogenous	mRNA	77.19	80.32	166.44	193.22	140.28	96.12	86.28	106.52	116.48	97.26	96.67	59.06	101.32	159.75	406.87	128.83	95.41	163.82	199.88	149.33	151.83
Itga6	Endogenous	mRNA	2378.5	2250.68	2025.05	2426.3	2272.53	2574.84	2038.3	2058.03	2028.41	1868.38	1872.52	3618.05	2919.57	3550.43	3054.62	2067.02	2373.06	2935.93	2959.85	2383.46	2309.31
Itgae	Endogenous	mRNA	15.01	15.52	33.29	19.57	20.82	14.11	16.81	14.07	16.11	11.26	17.15	15.31	16.26	11.62	20.12	17.25	24.53	13.73	8.38	9.82	19.11
Itgal	Endogenous	mRNA	62.89	138.73	223.31	220.13	153.85	120.81	125.5	113.55	118.95	113.64	91.99	88.59	145.1	214.94	445.37	162.19	89.96	187.36	257.33	172.91	156.08
Itgam	Endogenous	mRNA	133.65	373.29	273.24	483.47	390.07	260.13	261.09	325.59	187.1	169.95	188.65	234.06	361.51	440.54	1291.5	348.53	275.33	317.82	397.36	332.07	270.75
Itgav	Endogenous	mRNA	1350.77	1971.4	1828.09	2171.93	1726.79	1842.07	1303.21	1576.68	1415.05	1355.47	1337.73	1823.24	2315.39	2423.43	2660.87	1931.29	1626.11	2001.1	2140	1849	1862.31
Itgax	Endogenous	mRNA	41.45	88.53	123.44	164.69	98.65	76.72	63.87	51.25	58.24	56.31	31.18	68.9	146.35	134.58	180.25	52.91	55.88	50.03	73.01	38.32	50.96
Itgb2	Endogenous	mRNA	289.45	520.23	889.08	1112.87	695.97	448.83	434.78	552.69	508.03	416.67	336.77	416.71	786.81	721.32	2414.99	676.35	487.97	685.67	836.61	717.2	546.8
Itgb3	Endogenous	mRNA	125.07	114.09	135.93	146.75	113.13	163.13	118.78	100.49	106.56	120.8	121.61	210	143.85	179.12	269.5	163.34	117.22	181.47	134.05	115.93	146.52
Itgb8	Endogenous	mRNA	14.29	17.34	13.87	19.57	17.2	12.35	24.65	17.08	16.11	18.43	15.59	14.22	18.76	19.36	17.5	24.16	20.45	13.73	28.72	12.77	18.05
Itpk1	Endogenous	mRNA	722.56	551.26	717.09	556.03	670.63	628.72	563.64	549.68	706.29	613.24	562.85	662.8	788.06	855.9	742.87	614.24	715.6	647.42	818.66	779.09	613.69
Jag1	Endogenous	mRNA	401.66	351.38	332.88	323.67	308.61	287.46	344.01	417.03	375.45	439.2	353.92	354.37	351.5	338.87	404.25	454.35	453.89	457.11	378.21	467.65	439.57
Jag2	Endogenous	mRNA	14.29	15.52	26.35	19.57	19.91	16.75	25.77	22.11	28.5	31.74	24.95	22.97	16.26	23.24	28.87	33.36	24.53	24.52	28.72	26.53	26.54
Jak1	Endogenous	mRNA	2314.18	2524.49	2176.23	2448.31	2178.4	2332.34	2049.5	2107.27	1872.28	1813.09	1858.48	2374.48	2576.82	2800.06	2527.87	2243.01	2234.03	2496.47	2475.12	2340.23	2227.56
Jak2	Endogenous	mRNA	167.95	185.28	190.02	227.47	181.01	183.41	163.6	176.86	225.52	154.59	162.15	137.81	230.16	250.77	225.75	264.56	220.81	184.42	241.77	190.6	212.35
Jak3	Endogenous	mRNA	290.88	254.64	255.21	259.26	234.4	296.28	307.03	273.33	283.75	359.34	222.96	282.18	323.98	345.65	340.37	294.47	335.31	386.49	406.93	336.99	356.75
Jup	Endogenous	mRNA	5.72	12.78	13.87	7.34	11.77	10.58	17.93	17.08	26.02	17.4	20.27	14.22	5	8.71	8.75	11.5	19.08	9.81	13.17	12.77	12.74
Kat2b	Endogenous	mRNA	333.76	295.71	303.76	335.08	308.61	366.83	326.08	311.52	324.64	295.87	288.44	348.9	354	372.76	309.75	349.68	370.75	346.27	325.55	332.07	374.8
Kdr	Endogenous	mRNA	52.17	127.78	73.51	119.03	116.75	85.53	114.3	103.5	60.72	114.66	56.13	72.19	58.79	54.22	168	101.22	91.32	110.85	118.49	95.3	134.84
Kif2c	Endogenous	mRNA	551.74	518.4	460.49	412.54	538.49	587.27	491.93	510.49	599.72	565.12	481.77	617.96	619.19	645.8	396.37	577.43	622.91	554.23	548.16	522.67	604.14
Kir3dl1	Endogenous	mRNA	5	8.21	5.55	5.71	11.77	7.05	7.84	6.03	16.11	13.31	7.8	8.75	12.51	11.62	7	4.6	6.82	9.81	9.57	7.86	6.37
Kir3dl2	Endogenous	mRNA	22.87	23.73	38.84	23.64	29.87	21.16	26.89	30.15	43.37	25.59	28.06	29.53	21.27	32.92	21	27.61	25.9	21.58	34.71	9.82	27.61
Kit	Endogenous	mRNA	37.16	44.72	38.84	44.03	38.92	42.33	49.3	38.19	50.8	43	23.39	43.75	43.78	37.76	49.87	36.81	44.98	59.84	27.53	34.39	43.53
Klra1	Endogenous	mRNA	12.86	21.9	18.03	16.31	17.2	11.46	11.21	16.08	18.59	21.5	23.39	15.31	15.01	11.62	15.75	9.2	24.53	21.58	20.35	5.89	9.56
Klrb1	Endogenous	mRNA	4.29	15.52	4.16	6.52	4.53	9.7	8.96	10.05	3.72	6.14	3.12	13.12	3.75	6.78	4.37	10.35	1.36	4.9	3.59	2.95	7.43
Klrd1	Endogenous	mRNA	82.9	108.61	226.08	199.75	147.52	113.75	128.86	178.87	232.95	171.99	143.44	84.22	246.42	209.13	406	225.45	137.67	246.21	398.56	268.21	144.4
Klrg1	Endogenous	mRNA	27.87	36.51	36.06	26.09	32.58	28.22	32.5	35.17	44.61	45.05	42.1	40.47	36.28	27.11	27.12	31.06	31.35	34.33	34.71	32.42	42.47
Klrk1	Endogenous	mRNA	105.77	175.24	302.37	323.67	233.5	179.89	216.27	276.35	291.19	173.02	182.42	110.47	250.18	253.67	310.62	312.87	194.92	336.46	484.73	317.34	200.67
Kras	Endogenous	mRNA	1129.93	1484.03	1328.76	1354.19	1375.64	1282.13	1041	1269.19	1105.28	1092.36	1322.14	1509.34	1487.3	1325.48	1281.87	1518.34	1274.45	1338.97	1374	1299.8	1335.68
Lag3	Endogenous	mRNA	51.46	80.32	167.83	147.57	97.74	75.83	66.11	105.51	146.21	122.85	121.61	77.65	188.88	173.31	368.37	161.04	103.59	155.97	287.25	204.35	118.92
Lair1	Endogenous	mRNA	40.74	94.01	94.32	149.2	113.13	86.42	86.28	94.46	64.43	54.26	57.69	49.22	93.82	115.22	266	97.77	74.97	66.7	144.82	74.67	65.83
Lama1	Endogenous	mRNA	12.15	10.95	22.19	11.41	20.82	9.7	10.09	20.1	13.63	10.24	20.27	18.59	27.52	14.52	12.25	21.85	13.63	11.77	16.76	7.86	7.43
Lamb3	Endogenous	mRNA	1	7.3	4.16	3.26	9.05	4.41	4.48	1	7.43	6.14	7.8	5.47	7.51	6.78	7.87	10.35	2.73	9.81	7.18	2.95	5.31
Lamc2	Endogenous	mRNA	116.5	139.64	131.77	132.08	123.08	101.41	144.55	149.73	166.04	132.07	210.48	92.97	121.34	139.42	97.12	213.95	133.58	191.28	165.17	203.37	172
Lck	Endogenous	mRNA	84.33	83.05	155.35	115.77	99.55	83.77	89.64	81.4	141.26	105.45	110.7	97.34	143.85	141.36	162.75	128.83	85.87	146.16	175.94	125.76	118.92
Ldha	Endogenous	mRNA	37798.7	50257	42850.5	50013.8	48164.7	53360.8	60332.1	49629.9	56973.8	44632.2	47336.8	49832.3	58316.3	58368.6	41467.9	52320.7	50260.9	56418.3	57125.2	55975.9	48897.9
Ldhb	Endogenous	mRNA	12.15	20.08	40.22	26.09	22.63	22.93	17.93	21.1	22.3	15.36	20.27	25.16	25.02	33.89	53.37	27.61	34.08	16.68	33.51	18.67	21.24
Lgals9	Endogenous	mRNA	779.02	1093.4	900.17	936.77	1046.21	1090.78	1625.93	1382.74	930.56	963.37	1170.91	1063.1	1094.52	822.01	840	1003.03	1173.58	1299.74	1121.46	1035.52	1333.56
Lif	Endogenous	mRNA	173.67	220.87	282.95	262.52	227.16	102.29	202.82	197.96	230.47	263.11	216.72	165.15	272.69	349.52	432.25	438.25	388.47	233.46	308.79	380.21	352.5
Lilra5	Endogenous	mRNA	9.29	25.56	20.81	34.24	26.25	20.28	13.45	15.07	13.63	20.48	9.35	18.59	28.77	21.3	60.37	17.25	17.72	5.89	8.38	13.75	11.68
Lilrb4a	Endogenous	mRNA	1354.35	2157.59	2285.81	2665.18	2515.98	1576.65	1941.93	1926.39	1910.69	2084.39	1262.9	1139.66	1878.83	1512.34	3320.62	2384.49	1856.47	2330.7	2406.9	1712.44	2791.35
Loxl2	Endogenous	mRNA	224.41	230.91	148.41	135.34	182.82	184.29	342.89	365.78	309.78	283.58	318.06	237.34	167.62	155.88	91	291.02	339.4	463	428.48	464.71	296.23
Ltb	Endogenous	mRNA	66.47	76.67	177.54	108.43	87.79	74.07	95.25	90.44	130.11	101.35	110.7	80.94	145.1	86.17	211.75	134.58	110.41	145.18	174.74	119.86	106.18
Ly6c1	Endogenous	mRNA	1717.41	2990.87	3395.42	3563.62	2420.05	3468.97	4186.41	4340.15	3038.27	2197	2887.51	2583.38	2937.08	2731.32	5572.86	3524.4	3290.39	6858.68	5237.49	3806.07	3555.81
Ly6g	Endogenous	mRNA	7.86	12.78	9.71	10.6	16.29	16.75	20.17	16.08	12.39	16.38	20.27	19.69	18.76	23.24	14	13.8	21.81	10.79	29.92	6.88	9.56
Ly9	Endogenous	mRNA	149.37	266.5	219.15	289.43	282.37	217.8	210.67	203.99	117.71	143.33	166.83	176.09	195.14	239.15	321.12	204.75	134.94	213.84	189.1	155.23	201.73
Ly96	Endogenous	mRNA	463.84	494.68	518.74	507.11	523.11	484.99	463.91	473.31	506.79	496.53	488.01	453.9	529.12	650.64	627.37	557.88	602.47	548.34	536.2	535.44	502.21
Lyz1	Endogenous	mRNA	2066.18	7088.82	6645.21	11188.2	7259.23	3804.94	5699.17	5514.88	3256.35	2992.47	2815.79	3826.95	5541.42	4226.24	11658.5	4699.96	4860.61	4715.34	4814.99	3665.58	4541.12
Magea1	Endogenous	mRNA	8.58	15.52	22.19	17.12	13.58	10.58	21.29	12.06	12.39	14.33	21.83	7.66	12.51	9.68	14.87	21.85	10.9	12.75	13.17	9.82	6.37
Magea3	Endogenous	mRNA	10.01	21.9	23.58	17.12	10.86	8.82	16.81	14.07	16.11	8.19	17.15	16.41	21.27	16.46	16.62	18.4	9.54	18.64	13.17	8.84	15.93
Magea4	Endogenous	mRNA	22.87	29.21	34.68	24.46	23.53	21.16	25.77	35.17	45.85	26.62	35.86	28.44	21.27	22.27	16.62	17.25	31.35	20.6	25.13	13.75	25.48
Mageb4	Endogenous	mRNA	9.29	18.25	19.42	11.41	9.05	10.58	16.81	14.07	19.83	16.38	21.83	18.59	10.01	12.59	14	5.75	14.99	11.77	15.56	13.75	11.68
Maml2	Endogenous	mRNA	313.04	230.91	249.66	205.45	215.4	221.33	151.28	182.89	157.37	181.21	160.59	227.5	316.47	276.91	347.37	201.3	200.37	206.98	209.45	212.21	204.92
Map3k12	Endogenous	mRNA	59.32	31.94	43	23.64	31.68	33.51	44.82	30.15	32.22	41.97	43.66	51.41	35.02	36.79	40.25	31.06	54.52	32.37	43.09	32.42	44.59
Map3k5	Endogenous	mRNA	45.74	47.46	92.93	84.79	74.21	54.67	47.06	61.3	60.72	52.21	51.45	40.47	58.79	61	150.5	59.81	53.16	62.78	74.21	71.72	79.63
Map3k7	Endogenous	mRNA	980.56	1055.98	968.14	1103.08	1006.39	928.53	830.34	917.47	832.68	803.66	929.24	937.32	1062	1274.16	1218	1091.6	1011.38	1224.2	1147.79	1237.91	1066
Map3k8	Endogenous	mRNA	260.15	250.08	345.37	267.41	310.42	226.62	225.23	217.06	339.51	450.46	260.37	183.75	287.7	373.73	524.12	507.26	447.08	224.63	410.53	343.86	426.82
Mapk10	Endogenous	mRNA	12.86	9.13	23.58	10.6	5.43	7.94	11.21	9.04	14.87	13.31	15.59	13.12	11.26	4.84	10.5	16.1	10.9	9.81	10.77	10.81	16.99
Marco	Endogenous	mRNA	22.87	23.73	37.45	30.17	26.25	17.64	21.29	30.15	37.17	32.76	43.66	42.66	28.77	24.21	64.75	23.01	32.71	25.5	25.13	16.7	12.74
Mb21d1	Endogenous	mRNA	67.9	78.49	74.9	75.01	56.11	56.43	98.61	60.29	101.61	76.78	76.4	56.87	53.79	67.77	63	96.62	98.14	95.15	56.25	95.3	99.8
Mdm2	Endogenous	mRNA	726.84	810.46	905.72	870.73	831.72	559.06	595.02	746.64	739.74	597.88	877.79	449.52	826.84	902.37	1127.87	1060.54	823.28	851.45	945.52	994.25	814.36
Melk	Endogenous	mRNA	408.81	467.29	393.91	378.29	435.32	419.73	377.63	367.79	344.47	327.61	355.48	452.8	385.27	457.96	339.5	379.59	410.28	410.03	375.82	387.09	334.45
Met	Endogenous	mRNA	1084.91	1484.94	1319.05	1523.77	1266.13	1595.16	746.29	981.79	942.96	1038.1	815.43	1559.65	1727.47	1803.78	2010.75	1030.63	1091.8	1375.27	1388.36	992.29	1126.52
Mfge8	Endogenous	mRNA	1008.43	1288.71	1148.45	1171.57	1214.55	1208.06	1220.29	1319.43	1107.76	965.41	1047.74	1599.03	1403.49	1473.62	1174.25	1257.23	1215.83	1420.39	1235.17	1218.26	1073.43
Mfng	Endogenous	mRNA	52.17	57.5	70.74	61.96	84.17	74.95	134.47	96.47	94.17	135.14	109.14	114.84	123.84	76.49	74.37	96.62	119.95	72.59	82.58	113.97	110.42
Mgmt	Endogenous	mRNA	74.33	107.7	67.96	82.34	91.41	80.24	126.62	93.46	109.04	90.09	137.2	98.44	90.06	82.3	76.12	110.42	99.5	101.04	87.37	99.23	102.99
Mill2	Endogenous	mRNA	35.73	23.73	24.97	20.38	23.53	33.51	29.13	23.11	30.98	32.76	23.39	48.12	33.77	27.11	17.5	13.8	24.53	15.69	22.74	20.63	22.3
Mki67	Endogenous	mRNA	2577.9	1845.45	1760.13	1650.14	1553.93	1923.19	1441.04	1586.73	1714.91	2038.32	1599.67	1688.71	2082.72	2602.55	1946.87	1886.43	2011.85	2114.89	1978.42	2248.86	2271.09
Mlana	Endogenous	mRNA	17.15	14.6	26.35	16.31	19.01	5.29	14.57	13.06	16.11	26.62	32.74	19.69	18.76	21.3	10.5	17.25	5.45	10.79	25.13	8.84	14.86
Mlh1	Endogenous	mRNA	418.1	303.92	263.53	242.96	285.08	305.98	346.25	298.45	395.27	309.18	308.71	397.02	292.71	345.65	268.62	307.12	440.26	306.05	260.92	336.99	284.55
Mmp12	Endogenous	mRNA	248	486.46	786.44	854.42	470.61	176.36	172.57	274.34	112.76	239.56	130.97	229.68	504.11	298.21	1812.12	235.8	250.8	531.67	591.25	204.35	263.31
Mmp13	Endogenous	mRNA	150.8	488.29	610.29	909.05	314.95	234.56	135.59	265.29	178.43	205.78	149.68	201.25	546.64	486.04	938.87	255.36	175.83	424.74	442.84	194.53	254.82
Mmp1a	Endogenous	mRNA	14.29	22.82	23.58	15.49	17.2	14.99	22.41	18.09	26.02	21.5	38.98	17.5	27.52	24.21	10.5	19.55	17.72	9.81	21.54	8.84	16.99
Mmp7	Endogenous	mRNA	9.29	11.86	11.1	8.97	17.2	10.58	20.17	6.03	19.83	13.31	21.83	9.84	7.51	8.71	8.75	8.05	20.45	7.85	17.95	5.89	14.86
Mmp9	Endogenous	mRNA	251.57	261.94	195.57	267.41	293.23	216.92	187.13	162.79	80.54	103.4	126.29	366.4	212.65	229.47	135.62	136.88	128.13	224.63	114.9	155.23	148.65
Mmrn2	Endogenous	mRNA	30.73	34.68	45.77	46.47	33.49	53.79	48.18	42.21	43.37	45.05	17.15	50.31	52.54	37.76	112.87	26.46	61.34	40.22	32.32	59.93	41.41
Mrc1	Endogenous	mRNA	139.37	326.74	325.95	443.52	306.8	174.6	210.67	253.23	178.43	248.78	193.33	183.75	266.44	251.73	342.12	240.4	257.62	315.86	479.94	224	332.33
Mre11a	Endogenous	mRNA	884.79	837.84	743.44	798.17	804.57	931.17	652.17	628.06	651.77	620.4	548.81	1000.76	1062	1116.35	980.87	675.2	662.44	776.9	819.85	675.94	678.46
Ms4a1	Endogenous	mRNA	25.73	31.94	66.58	31.8	39.82	18.52	56.03	33.16	43.37	41.97	35.86	29.53	23.77	30.01	24.5	32.21	38.17	28.45	29.92	29.47	33.98
Ms4a2	Endogenous	mRNA	12.15	13.69	19.42	11.41	10.86	10.58	22.41	18.09	21.06	16.38	17.15	17.5	13.76	16.46	27.12	20.7	23.17	14.71	13.17	16.7	18.05
Ms4a4a	Endogenous	mRNA	201.54	551.26	575.61	1046.83	857.97	441.78	672.34	717.5	304.82	263.11	413.17	261.4	502.86	433.76	428.75	550.97	413	878.92	861.74	283.93	667.84
Ms4a6b	Endogenous	mRNA	131.5	662.61	586.71	722.34	700.49	519.38	694.75	661.22	369.25	286.65	405.37	277.81	491.6	360.17	551.25	490.01	404.82	523.82	708.54	342.88	668.9
Msh2	Endogenous	mRNA	601.77	675.39	509.04	591.9	575.6	584.63	630.88	643.13	495.64	581.5	551.93	740.45	725.51	668.07	423.5	510.72	686.97	658.21	511.06	523.65	662.53
Msh6	Endogenous	mRNA	1560.18	1399.15	1184.51	1159.34	1303.24	1320.93	1464.57	1447.05	1356.81	1572.51	1488.97	1489.66	1409.75	1447.47	1085	1415.97	1566.14	1618.54	1311.77	1542.47	1608.55
Mtor	Endogenous	mRNA	407.38	324.92	378.66	319.59	341.2	374.76	341.77	322.57	406.42	427.93	325.86	407.96	420.3	417.3	352.62	337.03	425.27	426.71	403.34	407.72	434.26
Mx1	Endogenous	mRNA	321.61	264.68	251.05	229.91	290.51	303.34	442.62	349.7	398.99	485.27	347.69	301.87	255.18	239.15	236.25	411.79	475.7	353.14	451.22	343.86	538.31
Mxi1	Endogenous	mRNA	1440.82	1291.45	1421.69	1425.94	1340.35	1319.16	1199	1161.66	1467.09	1393.35	1255.1	1480.91	1658.67	1890.91	1340.5	1403.32	1478.9	1411.56	1824.02	1514.96	1371.78
Myc	Endogenous	mRNA	24390.4	19989.6	27426.9	21340.2	20335.1	11799.3	14165	15260.4	21441.4	21026.1	20784.8	13797.4	23471.6	29977.7	31765	27532.6	26092.7	22347.6	25469.3	36307	17630.4
Myct1	Endogenous	mRNA	24.3	39.25	33.29	20.38	39.82	30.86	57.15	44.22	37.17	47.09	35.86	26.25	33.77	22.27	52.5	44.86	58.61	23.54	37.1	33.4	42.47
Myd88	Endogenous	mRNA	733.99	853.36	857.18	899.26	763.84	716.9	654.41	714.48	675.31	582.52	729.67	601.55	790.56	866.55	798.87	837.39	836.91	812.21	751.63	712.29	748.54
Nbn	Endogenous	mRNA	707.55	687.25	560.36	619.62	544.83	623.43	478.48	521.54	494.4	470.93	537.9	603.74	616.69	791.03	582.75	575.13	641.99	625.83	546.97	599.3	537.25
Ncam1	Endogenous	mRNA	9.29	10.04	9.71	9.78	13.58	6.17	15.69	17.08	11.15	15.36	24.95	15.31	8.76	11.62	7.87	18.4	12.27	10.79	20.35	5.89	9.56
Ncr1	Endogenous	mRNA	22.16	30.12	38.84	30.17	28.06	22.93	35.86	39.19	42.13	38.9	51.45	20.78	37.53	34.86	21	23.01	20.45	39.24	27.53	29.47	41.41
Ndufa4l2	Endogenous	mRNA	22.87	21.9	30.51	22.83	23.53	21.16	41.46	28.14	21.06	37.88	32.74	26.25	32.52	22.27	29.75	27.61	44.98	17.66	31.12	26.53	35.04
Nectin1	Endogenous	mRNA	385.93	298.45	409.17	346.5	350.25	320.09	181.53	197.96	175.95	188.37	221.4	273.43	367.76	369.86	440.12	257.66	228.99	256.02	251.34	260.35	230.4
Nectin2	Endogenous	mRNA	285.16	310.31	278.79	290.24	308.61	370.35	294.71	301.47	306.06	334.77	247.9	406.87	419.05	355.33	264.25	311.72	336.67	295.26	263.31	301.62	344.01
Neil1	Endogenous	mRNA	84.33	95.83	119.28	100.28	104.08	118.16	135.59	139.68	107.8	105.45	135.64	140	123.84	106.5	112.87	121.93	125.4	140.27	117.29	121.83	107.24
Nf1	Endogenous	mRNA	660.38	543.05	475.75	451.67	489.62	533.48	485.2	528.58	495.64	566.14	541.02	522.8	571.65	522.83	567	563.63	590.2	635.64	585.27	616.01	714.56
Nfam1	Endogenous	mRNA	37.88	57.5	70.74	76.64	66.07	60.84	58.27	50.24	55.76	56.31	45.21	47.03	55.04	54.22	130.37	54.06	73.6	62.78	50.27	49.12	37.16
Nfatc2	Endogenous	mRNA	253	217.22	289.89	239.69	247.98	90.82	97.49	120.59	130.11	131.04	190.21	51.41	193.89	232.37	238.87	218.55	182.65	233.46	199.88	334.04	187.93
Nfil3	Endogenous	mRNA	1390.79	1153.63	1398.11	817.73	1244.41	1216.87	1108.23	824.02	1317.16	1505.96	957.31	1116.69	1227.12	1383.57	945	1421.72	1462.55	805.35	1420.68	1129.83	1490.7
Nfkb1	Endogenous	mRNA	1022.73	1071.49	1054.13	1161.78	1143.96	1007.01	1046.6	1087.3	1069.34	1173.24	944.83	944.98	1250.89	1160.88	1383.37	1159.46	1187.21	1199.68	1090.34	1109.2	1181.73
Nfkb2	Endogenous	mRNA	560.32	439.91	485.46	560.92	489.62	410.92	505.37	461.25	500.6	411.55	484.89	387.18	507.86	573.18	489.12	509.57	462.07	595.43	523.03	482.39	510.7
Nfkbia	Endogenous	mRNA	48573.5	43770.5	52074.2	48896.1	42549	33558.4	33687.4	31453.3	45667	36237.3	41633.4	21481.9	44250.1	55873.5	37359.8	51693.8	51708.4	35991.4	40571.4	46675.9	40968.8
Nfkbie	Endogenous	mRNA	653.23	722.85	843.31	977.53	781.04	527.31	703.71	604.95	726.11	578.43	735.91	395.93	725.51	791.03	710.5	922.51	659.71	755.32	844.99	672.01	782.51
Ngfr	Endogenous	mRNA	22.16	21.9	38.84	24.46	28.06	15.87	28.01	26.13	35.93	19.45	23.39	27.34	32.52	30.01	16.62	28.76	29.99	18.64	26.33	17.68	26.54
Nid2	Endogenous	mRNA	20.01	18.25	18.03	18.75	23.53	19.4	34.74	23.11	21.06	28.67	21.83	22.97	21.27	14.52	27.12	24.16	32.71	29.43	19.15	15.72	20.17
Nkg7	Endogenous	mRNA	100.77	185.28	448.01	336.71	187.34	216.04	180.41	295.44	446.08	282.56	230.75	141.09	542.88	519.93	982.62	439.4	200.37	527.74	841.4	558.04	234.65
Nlrc5	Endogenous	mRNA	1322.9	744.75	1221.96	905.78	900.5	1186.89	824.73	921.49	1296.1	1143.55	963.54	997.48	1413.5	1507.5	2165.62	1157.16	1112.24	1669.55	1504.46	2018.97	1357.98
Nlrp3	Endogenous	mRNA	210.83	307.57	495.17	524.23	441.65	209.87	421.33	394.92	309.78	247.75	271.29	159.68	404.04	365.98	567.87	426.75	302.6	479.68	446.43	294.74	396.03
Nod2	Endogenous	mRNA	145.08	123.21	158.12	152.46	139.37	93.47	109.81	107.52	216.84	165.85	145	74.37	138.85	167.5	156.62	184.04	152.66	148.12	134.05	131.65	153.95
Nos2	Endogenous	mRNA	40.74	43.81	84.61	50.55	46.16	38.8	58.27	42.21	54.52	58.35	84.19	47.03	61.29	67.77	139.12	56.36	53.16	66.7	71.81	59.93	36.1
Notch1	Endogenous	mRNA	593.91	573.17	481.3	580.48	486	559.94	583.81	537.62	455.99	687.97	455.27	702.17	647.96	595.45	760.37	550.97	569.75	718.04	473.96	616.99	699.69
Notch2	Endogenous	mRNA	1486.56	1279.58	1233.06	1306.09	1316.82	1404.7	1308.81	1326.47	1195.73	1449.65	1239.51	1355.13	1534.84	1554.95	1702.75	1496.49	1457.09	1814.72	1485.31	1620.08	1583.07
Nras	Endogenous	mRNA	819.04	921.81	927.92	1021.56	870.64	966.45	821.37	832.06	768.24	786.25	799.83	969.04	1099.53	1100.85	1237.25	975.42	869.62	1146.71	1017.34	1053.2	1032.02
Nt5e	Endogenous	mRNA	620.35	806.81	635.25	814.47	653.43	921.47	1510.52	1403.84	1491.88	1418.94	1370.48	1296.07	1078.26	1324.51	1000.12	1379.16	1593.4	2117.83	1678.01	1513.98	1689.25
Oas1a	Endogenous	mRNA	1668.1	2820.2	2223.39	2455.65	2463.49	2957.53	3771.81	2975.5	2322.07	2081.32	3132.29	2550.57	2569.32	1693.4	2020.37	2427.05	2931.91	3384.22	2653.45	2404.09	3275.51
Oas2	Endogenous	mRNA	425.96	435.35	342.59	298.4	368.35	562.58	507.61	395.93	391.56	479.12	392.9	381.71	340.24	230.43	195.12	464.7	492.06	471.83	400.95	353.69	619
Oas3	Endogenous	mRNA	135.08	159.72	171.99	174.47	170.15	229.27	270.06	265.29	162.32	186.33	244.78	185.93	150.11	98.76	132.12	154.13	216.72	296.24	174.74	161.12	258.01
Oasl1	Endogenous	mRNA	358.78	524.79	454.94	467.98	551.16	430.31	819.13	652.18	511.75	511.88	604.94	397.02	511.61	365.98	543.37	710.86	655.62	524.8	590.05	485.34	683.77
Olfml2b	Endogenous	mRNA	19.3	37.42	40.22	23.64	29.87	42.33	52.67	45.22	43.37	34.81	48.33	22.97	33.77	19.36	56	47.16	47.71	41.2	33.51	51.09	40.35
Olr1	Endogenous	mRNA	28.59	43.81	47.16	68.48	45.25	24.69	38.1	41.2	58.24	38.9	57.69	36.09	61.29	30.98	34.12	58.66	46.34	42.18	37.1	23.58	43.53
Otoa	Endogenous	mRNA	6.43	13.69	11.1	3.26	9.05	6.17	14.57	12.06	8.67	14.33	14.03	14.22	7.51	6.78	8.75	16.1	6.82	3.92	9.57	5.89	5.31
P2ry13	Endogenous	mRNA	21.44	28.29	43	35.06	44.35	29.1	38.1	25.12	26.02	39.93	24.95	31.72	28.77	28.08	28.87	23.01	34.08	28.45	29.92	14.74	29.73
P4ha1	Endogenous	mRNA	1670.95	1767.87	1246.93	1385.99	1396.46	1629.55	1521.72	1483.23	1323.36	1721.98	1262.9	1928.24	1674.94	1621.75	1423.62	1326.25	1525.25	1411.56	1493.69	1344.01	1608.55
P4ha2	Endogenous	mRNA	1291.45	1358.08	1332.92	1425.12	1360.26	1606.63	1119.44	1213.92	1356.81	1368.78	1139.72	1674.49	1748.74	2026.46	1561	1122.65	1155.86	1267.36	1686.38	1354.82	1263.49
Palmd	Endogenous	mRNA	20.01	22.82	36.06	17.94	25.34	22.93	22.41	31.15	35.93	14.33	24.95	28.44	18.76	27.11	26.25	19.55	34.08	17.66	32.32	21.61	27.61
Parp12	Endogenous	mRNA	1410.81	2000.61	1835.03	1932.23	1644.44	2014.9	1916.16	1927.39	1561.27	1240.81	2062.73	1512.62	1846.31	1603.36	1932	1815.11	1709.26	2701.49	2143.59	2100.51	1986.54
Parp4	Endogenous	mRNA	376.64	422.57	436.91	454.12	398.21	460.3	393.32	481.35	416.34	476.05	419.41	415.62	552.89	550.91	601.12	456.65	526.13	612.1	515.85	568.85	522.38
Parp9	Endogenous	mRNA	662.52	913.6	818.34	831.59	771.08	933.82	907.65	938.57	728.59	581.5	905.85	699.98	768.04	808.46	816.37	859.24	741.5	1319.35	1168.14	972.64	987.43
Pcdhb11	Endogenous	mRNA	9.29	16.43	18.03	8.97	12.67	8.82	5.6	13.06	23.54	18.43	15.59	16.41	10.01	9.68	19.25	6.9	14.99	13.73	13.17	4.91	6.37
Pck2	Endogenous	mRNA	993.42	840.58	697.67	785.12	873.35	855.34	1252.79	1098.35	1168.47	813.9	1078.92	1128.73	1070.76	700.02	606.37	1554	1199.48	1569.49	1267.48	1047.31	1222.08
Pcx	Endogenous	mRNA	85.76	74.84	84.61	75.01	80.55	89.94	135.59	110.54	85.5	90.09	104.46	91.87	80.06	95.85	63.87	108.12	121.31	114.77	93.36	105.12	112.55
Pdcd1	Endogenous	mRNA	48.6	76.67	169.22	137.78	99.55	122.57	89.64	112.55	158.6	136.16	118.49	61.25	148.86	174.28	395.5	225.45	72.24	199.13	238.18	155.23	107.24
Pdcd1lg2	Endogenous	mRNA	24.3	32.86	54.09	33.43	28.06	35.27	28.01	30.15	34.69	41.97	29.62	22.97	47.53	41.63	56	39.11	39.53	43.16	34.71	20.63	40.35
Pdgfa	Endogenous	mRNA	28.59	41.07	48.55	35.06	51.59	37.92	45.94	55.27	44.61	60.4	48.33	42.66	57.54	50.35	37.62	48.31	57.25	44.14	41.89	33.4	33.98
Pdgfb	Endogenous	mRNA	124.36	235.47	273.24	308.18	252.5	104.93	117.66	129.63	143.74	166.87	121.61	77.65	186.38	223.66	497	250.76	175.83	125.56	210.65	197.48	151.83
Pdgfrb	Endogenous	mRNA	509.58	526.62	382.82	386.45	486	560.82	574.85	604.95	384.12	595.83	475.53	647.49	691.74	486.04	531.12	417.54	605.19	521.86	428.48	476.5	589.27
Pdk1	Endogenous	mRNA	2034.02	2048.98	1686.61	2010.5	1935.86	1952.29	2075.28	1811.83	2217.99	1807.97	1775.85	1812.3	2362.92	2765.21	1609.12	1895.63	2163.15	2147.26	2606.77	2414.9	2035.38
Pdzk1ip1	Endogenous	mRNA	12.15	16.43	12.48	9.78	13.58	13.23	16.81	13.06	11.15	11.26	21.83	21.87	25.02	18.4	25.37	16.1	12.27	13.73	23.94	8.84	11.68
Pecam1	Endogenous	mRNA	88.62	146.03	205.28	193.22	176.48	161.37	199.46	176.86	146.21	148.45	93.55	120.31	193.89	186.86	630	128.83	203.09	190.3	205.86	219.09	166.7
Pf4	Endogenous	mRNA	127.22	243.69	213.6	279.64	184.63	111.11	170.33	230.12	151.17	237.51	194.89	193.59	181.38	88.11	189.87	238.1	275.33	226.6	293.23	117.9	265.44
Pfkfb3	Endogenous	mRNA	488.14	600.55	653.29	550.32	570.17	455.01	643.2	665.24	750.89	812.87	890.26	379.52	442.81	467.65	791	1106.55	820.55	931.89	886.88	973.62	977.87
Pfkm	Endogenous	mRNA	248.71	214.48	202.5	199.75	194.58	212.51	322.72	317.55	339.51	346.03	238.55	309.52	281.45	327.26	200.37	299.07	399.37	301.15	258.52	355.65	355.69
Pgpep1	Endogenous	mRNA	332.33	326.74	400.85	361.17	391.88	370.35	368.66	352.72	355.62	290.75	416.29	445.15	381.52	420.2	299.25	388.79	377.56	402.18	383	452.92	388.6
Pias4	Endogenous	mRNA	391.65	323.09	355.08	291.06	384.64	405.62	407.88	355.73	451.03	449.43	416.29	370.77	386.52	359.21	279.12	507.26	489.33	415.92	375.82	372.35	448.06
Pik3ca	Endogenous	mRNA	948.4	777.61	719.86	633.48	804.57	779.51	739.57	792.86	768.24	764.75	806.07	732.8	843.1	878.17	755.12	927.11	914.6	927.96	932.36	969.69	968.32
Pik3cd	Endogenous	mRNA	187.96	163.37	144.25	179.36	162	193.11	226.35	213.04	234.19	222.16	240.11	202.34	155.11	173.31	249.37	208.2	245.35	267.79	238.18	237.76	245.26
Pik3cg	Endogenous	mRNA	29.3	54.76	80.45	67.67	70.59	53.79	43.7	65.32	45.85	66.54	76.4	41.56	50.04	62.93	115.5	75.92	39.53	58.86	83.78	60.91	40.35
Pik3r1	Endogenous	mRNA	280.87	293.88	445.23	339.16	312.23	193.99	172.57	201.98	232.95	203.73	249.46	181.56	325.23	362.11	560	303.67	283.51	351.17	385.39	387.09	237.83
Pik3r2	Endogenous	mRNA	1457.26	1310.62	1208.09	1212.33	1470.67	1611.04	1410.79	1279.24	1452.23	1273.57	1340.85	1479.81	1354.71	1532.68	1149.75	1402.17	1506.16	1426.28	1360.84	1589.63	1481.14
Pik3r5	Endogenous	mRNA	52.17	76.67	80.45	83.16	76.02	44.97	57.15	63.31	58.24	35.83	62.37	47.03	62.54	69.71	203.87	83.97	51.8	90.25	87.37	68.77	77.51
Pirb	Endogenous	mRNA	140.08	272.89	255.21	322.04	332.15	253.07	244.28	269.31	201.97	245.7	176.18	175	207.65	210.1	578.37	253.06	241.26	261.91	276.48	180.77	307.91
Pkm	Endogenous	mRNA	859.06	1172.8	930.69	1066.4	1044.4	1123.4	1188.91	1052.13	1037.13	1226.47	974.46	1422.94	1315.93	1061.16	1042.12	905.25	1059.08	1076.08	971.86	1057.13	1090.42
Pkp3	Endogenous	mRNA	75.76	75.75	91.54	83.16	108.6	69.66	129.99	110.54	120.19	139.23	113.82	86.4	140.1	116.19	92.75	131.13	137.67	104.96	95.75	153.26	156.08
Pla1a	Endogenous	mRNA	547.46	784.91	578.39	663.64	621.75	826.24	874.04	810.95	654.24	545.67	629.89	1018.26	849.35	802.65	747.25	624.59	636.54	950.52	799.51	644.5	765.52
Pla2g2a	Endogenous	mRNA	8.58	9.13	8.32	13.04	9.05	14.99	10.09	10.05	13.63	7.17	15.59	15.31	18.76	12.59	8.75	11.5	14.99	15.69	11.97	3.93	10.62
Plod2	Endogenous	mRNA	1131.36	1248.55	1033.33	1368.05	1103.23	1264.49	788.87	824.02	790.55	881.46	668.87	1122.16	1302.17	1673.07	1228.5	882.25	872.35	967.2	1336.9	939.24	837.72
Pms2	Endogenous	mRNA	181.53	167.02	165.06	142.68	173.77	158.72	170.33	157.77	198.26	190.42	180.86	238.43	207.65	185.9	146.12	165.64	182.65	172.64	191.5	171.93	184.74
Pnoc	Endogenous	mRNA	14.29	16.43	15.26	15.49	15.39	12.35	15.69	7.03	18.59	21.5	24.95	14.22	20.01	20.33	7.87	19.55	28.62	17.66	19.15	12.77	12.74
Pold1	Endogenous	mRNA	988.42	830.54	776.73	692.18	879.69	969.09	911.02	831.05	871.09	932.65	837.25	1102.48	1049.49	979.83	729.75	817.83	933.68	886.76	719.32	794.81	881.25
Pparg	Endogenous	mRNA	20.01	19.17	12.48	15.49	15.39	14.99	23.53	21.1	23.54	21.5	14.03	12.03	23.77	18.4	20.12	23.01	29.99	13.73	17.95	9.82	16.99
Ppargc1b	Endogenous	mRNA	18.58	23.73	31.9	24.46	29.87	22.93	19.05	14.07	24.78	22.52	31.18	25.16	27.52	21.3	28	18.4	12.27	16.68	39.5	20.63	26.54
Ppl	Endogenous	mRNA	12.86	12.78	16.64	17.94	14.48	17.64	13.45	11.05	22.3	14.33	24.95	15.31	18.76	14.52	17.5	12.65	8.18	10.79	21.54	7.86	13.8
Prdm1	Endogenous	mRNA	328.04	262.85	381.43	234.8	337.58	237.2	182.65	168.82	254.02	219.09	177.74	199.06	295.21	367.92	352.62	231.2	233.08	219.73	354.27	256.42	213.41
Prf1	Endogenous	mRNA	25.73	33.77	87.38	80.71	61.54	45.85	57.15	74.36	109.04	69.62	79.52	26.25	87.56	101.66	174.12	80.52	50.43	173.63	149.61	121.83	77.51
Prkaa2	Endogenous	mRNA	15.01	16.43	26.35	20.38	13.58	10.58	12.33	11.05	23.54	19.45	17.15	13.12	13.76	16.46	15.75	10.35	17.72	12.75	23.94	14.74	16.99
Prkacb	Endogenous	mRNA	536.02	615.15	522.91	520.15	564.74	531.72	449.34	508.48	447.32	441.24	463.06	599.36	666.72	603.19	600.25	542.92	474.34	600.33	588.86	497.13	565.91
Prkca	Endogenous	mRNA	271.58	178.89	239.95	254.37	191.87	228.38	135.59	196.96	172.23	183.25	148.12	176.09	233.92	279.81	341.25	195.54	193.55	272.7	250.14	276.07	174.13
Prkx	Endogenous	mRNA	459.55	545.79	617.22	574.78	518.58	527.31	389.95	439.14	474.58	489.36	483.33	487.8	562.9	611.91	603.75	579.73	595.65	533.63	602.02	527.58	594.58
Prlr	Endogenous	mRNA	13.58	19.17	22.19	9.78	18.1	11.46	21.29	12.06	14.87	16.38	14.03	14.22	11.26	14.52	15.75	9.2	16.36	11.77	17.95	24.56	9.56
Prom1	Endogenous	mRNA	2.86	9.13	16.64	13.86	10.86	14.11	8.96	12.06	7.43	3.07	12.47	7.66	2.5	9.68	3.5	11.5	4.09	6.87	17.95	10.81	6.37
Prr5	Endogenous	mRNA	202.97	167.02	191.41	142.68	179.2	198.4	175.93	145.71	184.63	183.25	143.44	210	153.86	155.88	142.62	167.94	179.92	149.1	144.82	125.76	157.14
Psmb10	Endogenous	mRNA	378.79	678.12	836.37	723.98	587.36	705.43	612.95	602.94	596.01	399.27	622.09	438.58	828.09	596.42	1064.87	660.25	497.51	967.2	913.21	937.27	566.98
Psmb5	Endogenous	mRNA	1717.41	2366.59	2111.04	2094.47	2328.64	2114.54	3516.32	3009.67	3079.16	2415.07	3141.65	2518.85	2550.55	2111.67	1780.62	3152.86	3211.33	3251.79	2879.66	2768.59	2709.59
Psmb8	Endogenous	mRNA	1887.51	3197.14	3285.85	3147.01	2587.48	3278.51	3854.73	3343.3	3624.37	2660.77	3542.34	2585.57	3547.51	3106.99	4475.61	3707.29	3260.4	4619.21	4212.97	4478.08	3549.44
Psmb9	Endogenous	mRNA	2489.99	3743.83	4155.51	3842.45	3116.01	4385.16	3325.82	2980.53	4070.44	2331.12	3447.24	3597.27	4513.19	4337.58	5515.99	3385.21	2728.81	4458.34	3991.55	4463.34	2764.8
Ptcd2	Endogenous	mRNA	702.54	738.36	790.6	748.43	698.68	792.73	739.57	786.84	800.46	708.45	731.23	837.79	889.38	874.29	693	829.34	827.37	812.21	715.73	778.11	797.38
Pten	Endogenous	mRNA	281.59	261.03	246.89	247.85	220.83	202.81	214.03	256.25	216.84	278.46	208.92	200.15	250.18	239.15	319.37	238.1	294.42	296.24	269.29	314.39	284.55
Ptger4	Endogenous	mRNA	169.38	235.47	291.27	289.43	251.6	166.66	171.45	192.94	234.19	219.09	166.83	88.59	233.92	275.94	377.12	310.57	258.98	216.79	335.12	253.48	270.75
Ptgs2	Endogenous	mRNA	410.95	741.1	890.47	1369.68	534.87	394.16	526.66	691.37	617.07	647.02	472.42	397.02	709.25	504.44	936.25	1105.4	640.63	1163.39	789.93	404.78	852.59
Ptpn11	Endogenous	mRNA	1323.61	1370.85	1319.05	1242.5	1287.86	1314.75	1286.4	1279.24	1457.18	1361.61	1353.33	1294.97	1399.74	1544.3	1612.62	1563.2	1527.97	1697.01	1678.01	1728.16	1718.98
Ptprc	Endogenous	mRNA	464.55	876.18	1044.42	1285.71	947.56	776.86	865.07	806.93	826.48	797.51	505.16	553.43	984.45	1120.22	2209.37	937.46	783.75	900.5	1360.84	878.32	987.43
Pvr	Endogenous	mRNA	2064.75	1854.58	2181.78	2068.38	1987.44	1774.17	1599.04	1958.55	2096.56	1910.35	1916.17	1935.9	2511.78	3016.94	2230.37	2575.43	2240.84	2219.85	2502.65	2283.25	2306.13
Pvrig	Endogenous	mRNA	67.9	49.28	59.64	32.61	50.68	72.31	72.84	64.31	92.93	144.35	65.48	109.37	62.54	59.06	78.75	71.32	91.32	61.8	53.86	50.11	100.87
Rad50	Endogenous	mRNA	786.16	644.36	618.61	685.66	593.7	731.01	630.88	646.15	638.14	658.28	597.15	752.48	801.82	844.28	761.25	629.19	737.41	753.36	721.71	752.57	791.01
Rad51	Endogenous	mRNA	669.67	798.6	705.99	732.94	829.91	817.42	773.19	754.68	695.14	711.52	689.14	942.79	850.6	868.48	769.12	738.47	786.48	786.71	661.87	735.87	774.02
Rad51c	Endogenous	mRNA	107.2	97.66	88.77	84.79	98.65	115.51	82.92	66.32	83.02	59.38	81.07	113.75	108.83	89.08	74.37	74.77	55.88	91.23	94.55	82.53	95.56
Rasal1	Endogenous	mRNA	20.73	28.29	45.77	36.69	37.11	29.98	39.22	37.18	44.61	29.69	45.21	28.44	26.27	28.08	24.5	24.16	28.62	16.68	47.87	15.72	24.42
Rasgrf1	Endogenous	mRNA	10.01	11.86	23.58	6.52	17.2	10.58	11.21	20.1	22.3	12.29	15.59	17.5	17.51	4.84	9.62	12.65	14.99	13.73	14.36	11.79	6.37
Rb1	Endogenous	mRNA	197.26	199.88	185.86	243.77	215.4	219.57	134.47	169.83	157.37	178.14	123.17	207.81	253.93	278.84	246.75	197.84	173.11	193.24	222.62	160.14	178.37
Rbl2	Endogenous	mRNA	423.81	451.78	378.66	448.41	421.74	457.65	443.74	447.18	386.6	398.25	413.17	512.96	540.38	526.71	522.37	450.9	487.97	547.36	475.16	463.72	484.16
Rela	Endogenous	mRNA	2190.54	1818.07	2195.65	1927.34	1955.77	1685.11	1516.12	1545.53	1928.04	1603.22	1739.99	1465.59	2056.46	2284.01	2045.74	2223.45	2101.81	1896.14	2021.51	2186.97	1815.6
Relb	Endogenous	mRNA	1873.93	1543.35	1737.93	1717	1543.07	1230.98	1235.98	1344.55	1412.57	1072.91	1524.83	1136.38	1531.08	1855.09	1674.75	1778.3	1530.7	1735.27	1476.93	1669.21	1494.95
Reln	Endogenous	mRNA	28.59	23.73	44.38	19.57	24.44	27.34	35.86	41.2	22.3	38.9	60.81	45.94	35.02	29.05	31.5	43.71	35.44	24.52	45.48	13.75	31.85
Ren1	Endogenous	mRNA	5.72	12.78	24.97	10.6	11.77	10.58	12.33	10.05	21.06	5.12	14.03	12.03	2.5	8.71	21	19.55	6.82	10.79	17.95	11.79	13.8
Rictor	Endogenous	mRNA	293.74	216.31	244.12	220.94	246.17	233.68	163.6	178.87	162.32	211.92	163.71	266.87	223.91	312.73	278.25	227.75	222.18	194.22	208.25	194.53	210.23
Ripk1	Endogenous	mRNA	322.33	300.27	348.14	359.54	311.33	287.46	274.54	287.4	312.25	219.09	307.15	275.62	315.22	373.73	408.62	314.02	303.96	350.19	378.21	353.69	299.41
Ripk2	Endogenous	mRNA	299.46	311.23	377.27	348.94	254.31	246.02	234.2	227.11	302.34	252.87	254.14	220.93	316.47	348.56	477.75	334.73	282.15	276.62	275.28	300.63	270.75
Ripk3	Endogenous	mRNA	681.82	650.74	722.64	779.41	765.65	730.12	748.53	666.25	714.96	678.76	662.63	765.61	936.91	869.45	738.5	767.22	783.75	785.73	799.51	833.13	776.14
Rnls	Endogenous	mRNA	8.58	17.34	6.94	18.75	16.29	9.7	16.81	17.08	14.87	16.38	15.59	12.03	11.26	9.68	17.5	21.85	14.99	15.69	17.95	8.84	9.56
Robo4	Endogenous	mRNA	45.03	59.32	74.9	63.59	59.73	59.08	59.39	75.37	50.8	97.26	54.57	40.47	43.78	51.32	70	51.76	102.23	42.18	46.68	71.72	75.38
Rock1	Endogenous	mRNA	676.1	662.61	640.8	605.76	640.76	756.58	691.39	778.8	710	958.25	598.71	686.86	863.11	715.51	793.62	800.58	776.93	761.2	734.88	736.85	929.03
Ror2	Endogenous	mRNA	25.73	31.94	26.35	26.9	21.72	22.93	33.62	32.16	37.17	37.88	35.86	37.19	31.27	19.36	22.75	21.85	29.99	18.64	37.1	20.63	25.48
Rorc	Endogenous	mRNA	215.12	146.03	97.09	108.43	176.48	163.13	231.96	203.99	246.58	256.97	249.46	290.93	171.37	175.25	68.25	152.98	282.15	201.09	125.67	242.67	237.83
Rpl23	Endogenous	mRNA	757.58	869.79	694.9	809.58	811.81	773.33	753.02	703.43	703.81	672.62	720.32	845.45	819.33	901.4	785.75	856.94	873.71	837.72	763.6	848.85	727.3
Rpl7a	Endogenous	mRNA	57973.8	70827.1	61105.1	61343.1	65710.5	67984.5	81005.3	67102.1	82719.8	84664.5	72387.3	75189.3	73623.3	64703.6	48079.4	72461.8	83310.6	70295.6	64902.4	68190.9	75968.4
Rps6kb1	Endogenous	mRNA	298.74	222.7	241.34	216.05	218.11	226.62	188.25	181.89	230.47	263.11	252.58	250.46	228.91	232.37	290.5	281.81	275.33	293.3	247.75	251.51	268.62
Rptor	Endogenous	mRNA	483.85	385.15	370.33	358.73	395.5	420.62	366.42	397.94	406.42	407.46	378.87	451.71	397.78	468.61	404.25	441.7	417.09	495.37	365.04	432.28	402.4
Rrm2	Endogenous	mRNA	2185.53	2642.22	2398.15	2508.64	2574.81	2416.99	2225.43	1931.41	2043.28	1729.14	2240.47	2780.25	2600.59	2985.96	2391.37	2378.74	2349.89	2263.99	2532.57	2650.69	2110.76
Rsad2	Endogenous	mRNA	860.49	1498.63	1198.38	1428.38	1254.37	1230.98	1699.89	1540.51	841.35	969.51	1658.91	739.36	986.95	703.89	968.62	1690.88	1159.95	1520.45	1435.04	1176.01	1861.25
Runx3	Endogenous	mRNA	160.09	190.75	349.53	357.91	304.09	156.96	203.94	203.99	193.3	153.57	169.95	71.09	223.91	272.07	289.62	277.21	160.84	205.01	365.04	190.6	229.34
S100a8	Endogenous	mRNA	237.28	344.08	314.85	295.95	344.82	378.29	237.56	163.8	188.34	221.13	244.78	474.68	422.8	363.08	280	262.26	268.52	168.72	169.95	151.3	180.5
S100a9	Endogenous	mRNA	42.17	67.54	34.68	18.75	23.53	20.28	16.81	42.21	12.39	72.69	28.06	133.43	28.77	33.89	72.62	39.11	99.5	15.69	20.35	3.93	40.35
Samsn1	Endogenous	mRNA	118.64	198.97	221.92	201.38	184.63	150.79	165.84	227.11	216.84	185.3	154.35	86.4	188.88	203.32	238.87	249.61	194.92	213.84	260.92	139.51	263.31
Sbno2	Endogenous	mRNA	202.26	142.38	228.86	187.52	192.77	177.24	234.2	232.13	268.88	303.04	218.28	204.53	258.93	260.45	301.87	282.96	288.97	275.64	247.75	264.28	307.91
Sele	Endogenous	mRNA	47.17	43.81	79.06	48.92	43.44	32.63	20.17	47.23	39.65	32.76	21.83	55.78	53.79	75.52	85.75	28.76	40.89	22.56	43.09	50.11	23.36
Sell	Endogenous	mRNA	72.18	139.64	199.73	191.59	188.25	179	290.23	215.05	123.91	119.78	168.39	90.78	143.85	95.85	67.37	184.04	218.09	297.22	229.8	94.32	237.83
Selp	Endogenous	mRNA	29.3	40.16	92.93	63.59	42.54	29.98	35.86	37.18	37.17	31.74	20.27	22.97	41.28	59.06	182	49.46	65.43	23.54	55.06	98.25	30.79
Serpina1a	Endogenous	mRNA	24.3	17.34	19.42	22.83	18.1	18.52	28.01	14.07	23.54	24.57	29.62	21.87	22.52	21.3	18.37	20.7	19.08	14.71	19.15	17.68	26.54
Serpinb5	Endogenous	mRNA	8.58	12.78	22.19	14.68	9.05	5.29	16.81	17.08	14.87	9.21	21.83	15.31	13.76	3.87	9.62	9.2	14.99	8.83	14.36	13.75	6.37
Serpinh1	Endogenous	mRNA	17766.6	23671.4	15015.9	18692.9	19566.7	19708.1	23154.1	21954	18933.5	16396.7	20033.3	26754.7	19834	20324.7	12754.8	21513.3	23045	24682.2	19267.2	19565.8	20915.5
Sfrp1	Endogenous	mRNA	22.16	30.12	38.84	26.09	34.39	30.86	38.1	35.17	37.17	47.09	42.1	57.97	36.28	22.27	51.62	21.85	31.35	21.58	40.69	14.74	33.98
Sfrp4	Endogenous	mRNA	17.15	20.08	44.38	25.27	22.63	25.57	32.5	26.13	37.17	37.88	32.74	40.47	21.27	14.52	36.75	18.4	32.71	22.56	17.95	40.28	18.05
Sfxn1	Endogenous	mRNA	874.79	942.8	859.95	926.98	826.29	898.55	859.47	802.91	931.8	794.44	788.92	1017.17	958.18	980.8	742	867.3	933.68	855.37	870.12	813.48	934.34
Sgk1	Endogenous	mRNA	3651.37	3335.86	5865.7	5318.12	5046.44	3175.34	2338.61	2965.45	3040.75	2996.57	2758.1	1666.84	4732.1	6034.85	5878.24	4604.49	4016.89	3680.46	5669.55	4284.53	3092.88
Sh2d1a	Endogenous	mRNA	12.86	10.95	20.81	18.75	12.67	13.23	15.69	18.09	22.3	16.38	15.59	13.12	20.01	16.46	41.12	23.01	20.45	15.69	41.89	17.68	15.93
Shc2	Endogenous	mRNA	18.58	17.34	11.1	22.01	16.29	14.11	21.29	16.08	17.35	14.33	10.91	13.12	16.26	28.08	24.5	18.4	20.45	22.56	19.15	21.61	13.8
Siglec1	Endogenous	mRNA	72.18	152.42	112.35	136.15	162	146.38	164.72	137.67	111.52	217.04	82.63	176.09	98.82	75.52	177.62	79.37	158.11	71.61	100.54	99.23	185.81
Siglecf	Endogenous	mRNA	15.72	31.94	37.45	20.38	21.72	22.04	34.74	25.12	48.32	35.83	38.98	27.34	42.53	20.33	21.87	29.91	24.53	19.62	34.71	13.75	25.48
Sirpa	Endogenous	mRNA	567.47	1120.78	1130.42	1392.51	1219.98	882.67	879.64	862.2	646.81	640.88	431.88	660.61	984.45	944.97	2158.62	860.39	832.82	724.91	1036.49	655.3	898.24
Slamf7	Endogenous	mRNA	382.36	791.3	936.24	1009.33	840.77	738.94	713.8	740.61	597.25	534.41	600.27	391.55	726.76	693.24	1405.25	772.97	557.48	825.94	1047.26	577.69	1007.6
Slc11a1	Endogenous	mRNA	488.14	949.19	1048.59	1464.26	1124.05	801.55	750.78	807.94	754.61	593.79	572.2	568.74	991.95	1158.95	2671.37	961.62	734.68	840.66	1107.1	806.6	880.19
Slc16a1	Endogenous	mRNA	21.44	24.64	8.32	10.6	17.2	5.29	22.41	24.12	44.61	25.59	12.47	29.53	27.52	25.17	58.62	27.61	35.44	20.6	17.95	47.16	31.85
Slc1a5	Endogenous	mRNA	1184.25	760.27	868.27	737.84	943.94	886.2	922.22	922.5	1137.49	1090.31	815.43	1000.76	1065.75	1001.13	852.25	1292.89	1263.54	1141.81	989.81	1189.77	1195.53
Slc2a1	Endogenous	mRNA	3815.75	3964.7	3803.2	3835.11	3917.87	4328.72	4280.54	4012.56	4869.66	4926.37	3442.56	4550.99	5881.66	5665.97	3823.74	4239.86	4548.48	4105.2	4908.35	4597.94	4413.7
Slc7a5	Endogenous	mRNA	2452.12	2439.61	2131.85	2207.8	2541.32	2416.99	3436.76	2904.16	2686.37	2185.74	2851.65	2935.56	2723.18	2214.3	2089.49	3210.37	2811.96	3765.8	3196.83	3640.03	3290.37
Smad5	Endogenous	mRNA	1107.78	1249.47	1109.61	1286.52	1119.52	1148.98	971.53	1136.54	971.45	1333.97	1280.05	1091.54	1238.38	1257.71	1435	1380.31	1174.94	1583.22	1128.64	1299.8	1555.47
Smap1	Endogenous	mRNA	1621.64	1620.93	1574.27	1629.76	1501.44	1611.92	1565.42	1520.41	1789.26	1549.98	1657.36	1619.81	1792.52	1950.94	1438.5	1878.37	1876.91	1805.9	1911.4	1980.65	1835.77
Snai1	Endogenous	mRNA	619.64	739.27	717.09	508.74	710.45	456.77	727.24	704.43	743.46	705.38	874.67	344.52	642.95	768.76	434.87	997.28	1064.54	633.68	576.89	856.71	799.5
Snca	Endogenous	mRNA	5	8.21	13.87	4.89	9.96	5.29	7.84	5.02	18.59	10.24	10.91	7.66	12.51	13.55	7	10.35	8.18	4.9	10.77	4.91	12.74
Socs1	Endogenous	mRNA	902.66	1019.47	1370.37	950.63	998.25	611.96	899.81	920.49	1348.14	1121.03	1194.29	547.96	1030.73	1261.58	1408.75	2203.9	1547.05	1411.56	1396.74	1681.98	1241.19
Sox10	Endogenous	mRNA	10.01	7.3	19.42	17.94	17.2	11.46	14.57	11.05	8.67	14.33	6.24	17.5	12.51	12.59	6.12	18.4	10.9	9.81	9.57	6.88	9.56
Sox11	Endogenous	mRNA	10.72	10.04	9.71	10.6	9.05	11.46	12.33	14.07	9.91	4.1	4.68	16.41	12.51	8.71	8.75	9.2	14.99	12.75	15.56	3.93	10.62
Sox2	Endogenous	mRNA	15.01	20.99	29.13	24.46	24.44	17.64	28.01	24.12	35.93	18.43	40.54	24.06	27.52	18.4	21	20.7	25.9	19.62	20.35	15.72	14.86
Spib	Endogenous	mRNA	41.45	39.25	61.03	39.13	37.11	30.86	54.91	53.26	65.67	38.9	56.13	33.91	36.28	37.76	29.75	42.56	50.43	30.41	37.1	23.58	43.53
Spp1	Endogenous	mRNA	2199.83	2850.31	2475.83	3356.54	3026.42	3000.74	4945.03	4567.26	4929.14	3606.73	3508.04	4623.18	4528.2	6102.63	5363.74	3675.08	4875.61	5421.61	5975.95	4273.72	3801.07
Spry4	Endogenous	mRNA	391.65	294.8	325.95	228.28	304.09	312.15	378.75	389.9	577.42	625.52	410.05	411.24	352.75	373.73	336	440.55	597.01	357.06	411.72	523.65	471.42
Srebf1	Endogenous	mRNA	732.56	701.85	671.32	709.3	709.54	748.64	751.9	670.27	664.16	669.54	636.13	728.42	758.04	777.47	696.5	813.23	722.41	820.06	765.99	759.45	752.78
Srp54a	Endogenous	mRNA	475.99	574.08	418.88	510.37	483.29	484.1	462.79	485.37	396.51	491.41	424.08	601.55	671.73	582.86	490	508.41	478.43	527.74	436.86	467.65	622.19
Stat1	Endogenous	mRNA	31.45	26.47	37.45	27.72	30.77	28.22	35.86	42.21	54.52	62.45	34.3	31.72	45.03	41.63	92.75	51.76	44.98	61.8	43.09	67.79	56.27
Stat2	Endogenous	mRNA	557.46	535.75	556.19	343.24	451.61	785.68	508.73	438.14	710	703.33	587.79	613.58	451.57	517.99	658.87	685.55	650.17	604.25	621.17	707.37	800.56
Stat3	Endogenous	mRNA	1487.99	1540.61	1912.7	1901.25	1423.61	1500.81	1381.65	1407.86	1386.55	1247.97	1261.34	1393.41	1827.54	2299.5	2807.87	1819.71	1465.27	2377.78	2264.47	2185.98	1657.4
Stat4	Endogenous	mRNA	8.58	15.52	18.03	13.86	16.29	15.87	23.53	14.07	12.39	17.4	23.39	17.5	20.01	14.52	14.87	18.4	20.45	14.71	16.76	3.93	14.86
Stc1	Endogenous	mRNA	53.6	33.77	45.77	51.36	41.63	38.8	44.82	38.19	22.3	41.97	26.51	55.78	41.28	51.32	49.87	37.96	39.53	43.16	26.33	40.28	25.48
Syk	Endogenous	mRNA	253	330.39	517.36	532.38	438.94	260.13	314.88	293.43	313.49	236.49	229.19	140	318.98	429.89	877.62	431.35	359.84	412.97	487.12	352.7	401.34
Taf3	Endogenous	mRNA	220.13	164.28	181.7	154.9	130.32	133.15	170.33	169.83	205.69	227.28	222.96	185.93	176.37	203.32	202.12	210.5	212.63	206	192.7	231.86	194.3
Tap1	Endogenous	mRNA	2620.78	3112.26	3228.98	3020.64	2622.77	3433.7	2984.05	2949.38	3315.83	2521.54	2932.72	2630.41	3469.96	3497.18	4280.49	3543.95	3043.68	4933.11	3846.73	4411.27	3432.65
Tap2	Endogenous	mRNA	1059.89	1341.65	1416.15	1447.14	1225.41	1698.33	1515	1501.32	1369.21	1391.3	1358	1553.09	1855.06	1442.63	2065.87	1440.12	1301.71	2007.97	1637.31	1943.32	1648.9
Tapbp	Endogenous	mRNA	774.73	1055.06	1095.74	1087.59	896.88	1246.86	1027.55	1089.31	898.35	691.04	944.83	935.14	1183.34	1172.5	1390.37	975.42	926.87	1588.13	1244.74	1430.47	1178.55
Tapbpl	Endogenous	mRNA	87.91	104.05	131.77	136.15	97.74	111.99	99.73	100.49	106.56	71.66	98.23	107.19	120.08	151.04	164.5	110.42	92.69	148.12	110.11	139.51	101.93
Tbx21	Endogenous	mRNA	37.16	56.59	61.03	41.58	44.35	51.14	45.94	53.26	74.35	67.57	43.66	63.44	68.8	45.51	50.75	62.11	28.62	45.12	77.8	32.42	71.14
Tbxas1	Endogenous	mRNA	35.73	77.58	127.61	119.85	83.26	73.19	53.79	68.33	85.5	101.35	74.84	92.97	117.58	101.66	455.87	54.06	57.25	60.82	113.7	103.16	61.58
Tcf3	Endogenous	mRNA	25.01	26.47	26.35	24.46	20.82	14.11	35.86	30.15	33.46	16.38	21.83	27.34	32.52	30.01	28	40.26	23.17	33.35	32.32	22.6	35.04
Tcl1	Endogenous	mRNA	14.29	13.69	8.32	8.15	9.96	7.94	15.69	12.06	16.11	12.29	7.8	10.94	5	13.55	12.25	13.8	16.36	13.73	8.38	5.89	19.11
Tdo2	Endogenous	mRNA	21.44	23.73	19.42	22.83	25.34	21.16	23.53	30.15	29.74	30.71	34.3	31.72	20.01	14.52	17.5	25.31	19.08	19.62	28.72	15.72	18.05
Tgfb1	Endogenous	mRNA	3658.52	4198.35	4252.6	4891.73	4181.23	4183.23	4586.45	4114.05	4106.38	3537.12	4021	4787.24	5073.59	4813.94	4685.61	4032.81	4150.47	5245.04	4965.8	4237.37	4507.14
Tgfb2	Endogenous	mRNA	62.89	84.88	101.25	77.45	98.65	78.48	113.18	135.66	128.87	116.71	127.85	79.84	80.06	61	85.75	166.79	129.49	130.46	140.03	125.76	133.78
Tgfb3	Endogenous	mRNA	721.84	495.59	478.52	425.58	599.13	509.68	606.22	553.7	598.49	560	612.74	497.65	466.58	512.18	326.37	651.05	711.51	572.86	623.57	624.85	640.24
Tgfbr1	Endogenous	mRNA	230.85	362.34	424.43	508.74	390.97	230.15	190.5	238.16	189.58	214.99	265.05	165.15	292.71	385.35	640.5	310.57	243.98	350.19	366.24	290.81	276.06
Tgfbr2	Endogenous	mRNA	95.77	118.65	153.96	146.75	133.04	119.92	140.07	116.57	109.04	112.61	79.52	96.25	133.84	132.64	243.25	109.27	141.76	130.46	157.99	151.3	127.41
Thbd	Endogenous	mRNA	42.17	90.36	117.9	77.45	87.79	42.33	38.1	63.31	34.69	54.26	74.84	30.62	46.28	60.03	180.25	110.42	80.42	68.67	90.96	142.46	97.68
Thbs1	Endogenous	mRNA	631.79	1135.38	1546.53	1756.13	1415.46	811.25	1668.51	1791.73	1634.37	1566.36	1197.41	679.2	915.65	816.2	1217.12	2392.54	1440.74	1772.54	1986.8	1029.62	2108.64
Thy1	Endogenous	mRNA	156.52	250.99	439.68	375.85	229.88	234.56	320.48	285.39	281.28	245.7	196.45	169.53	296.46	265.29	470.75	310.57	301.23	411.99	531.41	359.58	249.51
Ticam1	Endogenous	mRNA	151.52	126.86	130.38	113.32	134.85	134.91	127.74	119.58	179.67	216.01	120.05	120.31	113.83	169.44	127.75	147.23	189.46	115.75	144.82	148.35	178.37
Tie1	Endogenous	mRNA	26.44	41.98	43	39.13	56.11	53.79	66.11	44.22	55.76	65.52	51.45	63.44	51.29	61.97	91	54.06	83.15	31.39	41.89	60.91	54.15
Tigit	Endogenous	mRNA	229.42	262.85	375.88	307.36	273.32	254.84	156.88	208.01	218.08	166.87	176.18	235.15	385.27	482.17	605.5	330.12	174.47	265.83	429.67	280.99	237.83
Tlr1	Endogenous	mRNA	37.88	125.04	95.7	105.17	127.61	74.95	101.97	83.41	64.43	66.54	60.81	78.75	98.82	71.65	97.12	69.02	70.88	78.47	71.81	39.3	73.26
Tlr2	Endogenous	mRNA	198.68	453.6	521.52	744.36	542.11	337.73	301.43	352.72	258.97	273.35	324.3	168.43	355.25	367.92	679	423.3	265.79	380.6	290.84	265.27	346.13
Tlr3	Endogenous	mRNA	27.16	48.37	41.61	37.5	41.63	40.56	42.58	43.21	29.74	26.62	56.13	29.53	37.53	32.92	36.75	39.11	25.9	27.47	44.28	16.7	31.85
Tlr4	Endogenous	mRNA	69.33	102.22	106.8	75.01	90.5	97	76.2	98.48	78.06	96.23	62.37	77.65	77.55	86.17	171.5	83.97	73.6	82.4	159.18	82.53	111.48
Tlr5	Endogenous	mRNA	51.46	32.86	36.06	29.35	42.54	55.55	50.43	51.25	40.89	26.62	42.1	49.22	40.03	37.76	35.87	36.81	57.25	43.16	61.04	43.23	47.78
Tlr7	Endogenous	mRNA	62.18	155.16	148.41	195.67	225.35	177.24	112.06	156.76	109.04	159.71	132.53	121.4	148.86	119.09	215.25	158.74	141.76	125.56	168.76	90.39	183.68
Tlr8	Endogenous	mRNA	54.32	130.51	167.83	182.62	218.11	183.41	125.5	182.89	133.82	118.76	135.64	115.93	163.87	159.75	472.5	181.74	141.76	153.03	242.96	135.58	209.17
Tlr9	Endogenous	mRNA	105.77	210.83	244.12	295.13	257.03	164.01	218.51	221.08	127.63	134.11	194.89	92.97	177.63	170.4	420	200.15	145.85	245.23	329.14	168.98	242.08
Tmem140	Endogenous	mRNA	11.44	10.04	19.42	12.23	11.77	4.41	13.45	16.08	14.87	14.33	14.03	8.75	8.76	11.62	34.12	11.5	10.9	12.75	13.17	7.86	10.62
Tmem173	Endogenous	mRNA	424.53	463.64	378.66	422.32	351.15	477.05	527.78	572.79	545.2	611.19	512.95	450.62	505.36	422.14	422.62	557.88	680.16	702.35	567.31	578.67	664.66
Tnf	Endogenous	mRNA	1105.63	1402.8	1550.69	1750.42	1315.91	876.5	1011.87	863.21	1468.33	1203.95	1153.76	721.86	1114.54	1039.86	1586.37	1861.12	1181.76	1760.77	1151.39	1122.96	1230.57
Tnfaip3	Endogenous	mRNA	2870.93	2640.4	3940.52	3007.6	3316.02	2538.68	2090.97	2325.33	2817.71	2625.96	2411.97	1251.22	2754.45	3508.79	3337.24	3745.25	3230.41	2432.71	3438.6	2852.1	3229.85
Tnfaip6	Endogenous	mRNA	1076.33	1317	1223.35	1226.19	992.82	920.59	695.87	747.64	788.07	873.27	756.18	739.36	1399.74	1447.47	1398.25	1124.95	966.4	1045.67	1034.09	927.45	954.52
Tnfrsf10b	Endogenous	mRNA	697.54	655.31	491	540.54	507.72	625.19	714.92	660.22	783.11	796.49	743.71	639.83	627.94	557.69	413	856.94	865.53	658.21	688.2	721.13	858.96
Tnfrsf11a	Endogenous	mRNA	37.16	81.23	90.16	123.11	102.27	98.76	89.64	91.45	87.98	74.74	77.96	62.34	90.06	84.23	183.75	93.17	85.87	95.15	105.32	60.91	97.68
Tnfrsf11b	Endogenous	mRNA	15.72	16.43	9.71	13.04	7.24	9.7	10.09	14.07	17.35	8.19	28.06	15.31	5	20.33	9.62	18.4	13.63	10.79	20.35	3.93	10.62
Tnfrsf14	Endogenous	mRNA	147.94	177.06	183.09	174.47	145.71	193.11	150.16	180.88	193.3	196.56	141.88	180.46	242.67	189.77	341.25	174.84	189.46	200.11	192.7	237.76	169.88
Tnfrsf17	Endogenous	mRNA	12.15	14.6	16.64	9.78	7.24	14.99	20.17	11.05	17.35	13.31	23.39	22.97	17.51	6.78	9.62	8.05	6.82	6.87	21.54	10.81	13.8
Tnfrsf18	Endogenous	mRNA	27.16	50.2	92.93	63.59	49.78	48.5	81.8	62.3	87.98	65.52	53.01	47.03	86.31	72.62	77	77.07	74.97	65.72	116.1	65.83	79.63
Tnfrsf1a	Endogenous	mRNA	3197.54	3036.5	3291.39	2926.07	3154.02	3298.79	3570.11	3315.16	4039.47	4072.55	3490.89	3404.77	3582.54	3305.47	3156.99	3675.08	4044.15	3677.52	3519.98	3671.47	3828.68
Tnfrsf1b	Endogenous	mRNA	822.61	922.72	1068	1243.31	1011.82	848.28	936.79	984.8	1021.02	919.34	1069.56	736.08	1038.23	1082.46	1449.87	1391.81	973.21	1481.21	1206.44	1147.52	1201.9
Tnfrsf25	Endogenous	mRNA	14.29	12.78	27.74	14.68	14.48	12.35	15.69	20.1	22.3	20.48	21.83	16.41	10.01	18.4	16.62	16.1	10.9	21.58	23.94	10.81	16.99
Tnfrsf4	Endogenous	mRNA	76.47	64.8	117.9	85.61	99.55	81.12	79.56	89.44	104.08	84.97	67.04	51.41	106.33	82.3	121.62	106.97	104.95	121.64	142.43	74.67	102.99
Tnfrsf8	Endogenous	mRNA	15.01	15.52	24.97	15.49	11.77	15.87	25.77	18.09	26.02	32.76	32.74	22.97	11.26	12.59	14	9.2	13.63	14.71	26.33	12.77	20.17
Tnfrsf9	Endogenous	mRNA	91.48	129.6	180.31	184.25	120.37	105.82	100.85	135.66	135.06	73.71	99.78	112.65	165.12	197.51	212.62	118.48	109.04	188.34	198.68	142.46	101.93
Tnfsf10	Endogenous	mRNA	85.05	76.67	144.25	132.89	85.98	89.94	73.96	77.38	66.91	77.81	113.82	66.72	100.07	127.8	206.5	94.32	59.97	141.25	104.13	104.14	59.46
Tnfsf12	Endogenous	mRNA	270.15	301.19	300.98	340.79	295.94	290.11	210.67	240.17	174.71	188.37	215.16	330.31	282.7	350.49	333.37	248.46	228.99	274.66	247.75	209.27	224.03
Tnfsf13	Endogenous	mRNA	80.05	134.16	101.25	108.43	135.75	97	141.19	112.55	110.28	93.16	115.38	164.06	120.08	91.01	83.12	115.03	128.13	76.51	96.95	70.74	98.74
Tnfsf13b	Endogenous	mRNA	21.44	24.64	56.87	42.39	36.2	22.93	35.86	27.13	48.32	34.81	23.39	43.75	47.53	41.63	79.62	26.46	29.99	22.56	37.1	36.35	24.42
Tnfsf18	Endogenous	mRNA	25.01	24.64	37.45	26.09	24.44	22.93	28.01	32.16	43.37	30.71	38.98	39.37	38.78	25.17	21.87	34.51	29.99	20.6	31.12	18.67	21.24
Tnfsf4	Endogenous	mRNA	26.44	60.24	102.64	130.45	74.21	22.04	41.46	55.27	60.72	56.31	46.77	24.06	67.55	68.74	93.62	81.67	39.53	91.23	84.98	42.25	62.64
Tnfsf8	Endogenous	mRNA	16.44	25.56	47.16	28.54	25.34	22.93	28.01	22.11	17.35	14.33	18.71	16.41	20.01	30.98	28.87	34.51	19.08	28.45	33.51	20.63	32.91
Tnfsf9	Endogenous	mRNA	45.03	76.67	59.64	88.05	66.97	42.33	81.8	93.46	85.5	91.12	74.84	54.69	43.78	41.63	40.25	74.77	62.7	55.91	50.27	38.32	79.63
Tnks	Endogenous	mRNA	894.08	847.88	771.18	800.61	768.37	771.57	765.34	831.05	791.78	842.56	788.92	747.01	1059.5	1081.49	1024.62	930.56	973.21	1065.29	1000.58	1156.36	1144.57
Tpi1	Endogenous	mRNA	123.64	155.16	176.15	150.01	135.75	156.96	151.28	132.65	167.28	168.92	127.85	177.18	195.14	152.01	160.12	143.78	145.85	165.78	177.14	181.76	156.08
Tpm1	Endogenous	mRNA	7004.72	7770.6	6395.54	7185.13	6567.79	6157.56	6864.55	7448.3	7549.84	6376.02	6947.48	6434.39	8501.01	10113.9	8156.73	8699.41	8328.2	9123.65	9460.03	8988.57	8182.93
Tpsab1	Endogenous	mRNA	10.72	11.86	13.87	13.04	13.58	12.35	19.05	30.15	21.06	22.52	28.06	16.41	21.27	11.62	47.25	20.7	14.99	29.43	28.72	22.6	18.05
Traf1	Endogenous	mRNA	109.35	116.82	156.73	195.67	148.42	105.82	143.43	115.56	146.21	127.97	87.31	86.4	137.6	139.42	162.75	172.54	132.22	159.89	172.35	122.81	161.39
Trat1	Endogenous	mRNA	23.58	24.64	38.84	24.46	28.96	17.64	35.86	37.18	39.65	24.57	38.98	30.62	41.28	29.05	29.75	43.71	35.44	18.64	33.51	21.61	33.98
Trem1	Endogenous	mRNA	47.88	70.28	88.77	128.82	122.18	38.8	93.01	76.37	68.15	62.45	76.4	43.75	61.29	76.49	64.75	121.93	88.6	81.42	84.98	51.09	93.43
Trem2	Endogenous	mRNA	102.2	256.46	345.37	312.26	338.48	130.51	164.72	195.96	148.69	148.45	180.86	105	265.19	196.55	571.37	213.95	208.55	113.79	335.12	174.88	197.49
Trim21	Endogenous	mRNA	245.14	264.68	274.63	206.27	256.12	325.38	312.64	264.29	308.54	320.44	305.59	299.68	295.21	260.45	308	343.93	310.77	379.62	276.48	334.04	315.34
Trp53	Endogenous	mRNA	1130.65	1104.35	1026.39	899.26	1109.56	1021.12	1344.67	1428.96	1251.49	1313.49	1261.34	1097.01	1282.16	1192.83	842.62	1479.23	1581.13	1501.81	1286.63	1351.87	1466.28
Tslp	Endogenous	mRNA	24.3	48.37	56.87	29.35	37.11	29.98	44.82	24.12	43.37	46.07	46.77	31.72	28.77	34.86	28	41.41	38.17	40.22	40.69	20.63	24.42
Ttc30a1	Endogenous	mRNA	13.58	19.17	30.51	13.86	18.1	8.82	21.29	15.07	14.87	13.31	23.39	21.87	11.26	11.62	17.5	12.65	20.45	16.68	20.35	4.91	18.05
Twf1	Endogenous	mRNA	1107.78	1055.98	1080.49	1195.21	1080.6	865.92	1113.84	1268.18	1087.93	1006.36	1195.85	950.45	1155.82	1244.15	1199.62	1288.29	1285.35	1528.29	1424.27	1366.61	1219.95
Twist1	Endogenous	mRNA	2674.39	1849.1	1724.06	1465.07	2007.35	2192.14	1224.77	1100.36	1672.79	1594.01	1264.45	2425.88	2107.74	2643.21	1381.62	1463.13	1751.51	1289.93	1589.44	1351.87	1351.61
Twist2	Endogenous	mRNA	744.71	612.41	581.16	538.09	528.54	592.56	625.27	582.84	702.57	703.33	631.45	602.64	696.74	829.76	558.25	731.57	842.36	598.37	619.98	713.27	714.56
Tymp	Endogenous	mRNA	19.3	27.38	33.29	17.12	24.44	19.4	26.89	28.14	32.22	21.5	51.45	28.44	20.01	22.27	14.87	25.31	20.45	16.68	27.53	14.74	19.11
Tyms	Endogenous	mRNA	82.19	83.97	105.41	94.57	66.97	75.83	88.52	97.48	111.52	105.45	99.78	98.44	88.81	100.69	90.12	83.97	103.59	103	107.72	101.19	97.68
Uba7	Endogenous	mRNA	124.36	133.25	167.83	169.58	181.91	185.18	255.49	172.84	229.23	256.97	160.59	168.43	166.37	160.72	232.75	190.94	185.37	209.92	233.39	158.18	201.73
Ube2c	Endogenous	mRNA	8256.15	8179.48	8018.35	7630.28	8994.17	8587.78	8137.51	7069.46	9068.97	7682.35	8369.41	10012	8240.83	9787.64	6978.11	8668.36	9015.17	8547.84	9213.47	8923.73	7223.1
Ube2t	Endogenous	mRNA	650.37	508.37	511.81	433.73	530.35	564.35	536.75	417.03	578.66	600.95	565.96	706.55	576.66	609	353.5	580.88	674.71	400.22	505.08	425.41	529.81
Ulbp1	Endogenous	mRNA	417.38	384.24	357.85	331.01	359.3	337.73	341.77	354.73	446.08	435.1	439.67	418.9	382.77	440.54	452.37	492.31	532.95	431.61	423.69	493.2	511.76
Vcam1	Endogenous	mRNA	149.37	388.8	448.01	566.62	486	302.45	153.52	190.93	193.3	173.02	154.35	200.15	282.7	299.18	455	265.71	174.47	225.61	284.85	160.14	172
Vcan	Endogenous	mRNA	265.15	336.78	278.79	390.52	271.51	326.26	166.96	216.05	142.5	158.68	160.59	265.78	377.77	487.01	444.5	203.6	185.37	327.63	295.63	120.84	186.87
Vegfa	Endogenous	mRNA	2069.75	1355.34	1575.65	1290.6	1468.86	1275.95	1720.06	1290.29	2173.38	1995.32	1523.27	1577.15	1558.6	1861.87	1683.5	1969.24	2003.67	1286	1952.09	1969.84	1686.06
Vegfb	Endogenous	mRNA	1234.99	1209.31	1074.94	1120.21	1145.77	1226.57	1018.59	981.79	1084.21	1047.31	1018.11	1350.75	1229.62	1223.82	857.5	1015.68	1135.42	1060.39	976.64	1204.5	959.82
Vegfc	Endogenous	mRNA	37.16	66.63	58.25	40.76	37.11	42.33	47.06	44.22	64.43	55.28	51.45	50.31	43.78	41.63	48.12	54.06	59.97	51.01	49.07	39.3	54.15
Vhl	Endogenous	mRNA	222.27	284.76	231.63	215.24	227.16	239.85	249.88	240.17	296.14	284.61	233.87	218.75	278.95	264.32	270.37	325.52	310.77	238.37	226.21	289.83	274.99
Vsir	Endogenous	mRNA	681.1	758.44	696.28	812.84	899.6	895.9	824.73	699.41	693.9	824.13	665.75	815.92	710.5	761.98	1078.87	801.73	842.36	706.27	854.56	728.01	883.38
Vtcn1	Endogenous	mRNA	12.15	22.82	27.74	13.04	19.91	10.58	15.69	15.07	14.87	15.36	18.71	18.59	20.01	18.4	16.62	16.1	23.17	29.43	17.95	11.79	9.56
Wdr76	Endogenous	mRNA	140.08	192.58	170.6	147.57	153.85	213.39	182.65	147.72	130.11	149.47	145	224.21	183.88	173.31	179.37	165.64	186.74	165.78	141.23	189.62	168.82
Wnt10a	Endogenous	mRNA	39.31	29.21	18.03	17.12	46.16	19.4	39.22	31.15	34.69	24.57	45.21	27.34	16.26	16.46	10.5	40.26	43.62	36.29	34.71	27.51	31.85
Wnt11	Endogenous	mRNA	40.02	51.11	69.35	65.22	57.92	31.74	51.55	53.26	44.61	46.07	63.92	35	48.78	54.22	48.12	75.92	72.24	42.18	75.4	49.12	65.83
Wnt2	Endogenous	mRNA	9.29	4.56	8.32	5.71	12.67	7.94	10.09	12.06	16.11	6.14	15.59	9.84	8.76	8.71	8.75	11.5	5.45	10.79	10.77	4.91	22.3
Wnt2b	Endogenous	mRNA	12.15	13.69	24.97	10.6	12.67	11.46	17.93	10.05	21.06	22.52	21.83	12.03	17.51	7.75	12.25	16.1	14.99	18.64	19.15	17.68	22.3
Wnt3a	Endogenous	mRNA	7.86	8.21	11.1	9.78	11.77	7.05	11.21	10.05	13.63	8.19	14.03	8.75	7.51	8.71	8.75	8.05	9.54	10.79	7.18	1.96	7.43
Wnt4	Endogenous	mRNA	37.88	39.25	30.51	26.09	38.92	40.56	39.22	40.2	38.41	30.71	26.51	41.56	25.02	31.95	28	47.16	54.52	35.31	34.71	25.54	30.79
Wnt5a	Endogenous	mRNA	8.58	15.52	12.48	13.04	19.01	10.58	20.17	23.11	22.3	23.55	24.95	14.22	20.01	6.78	11.37	10.35	19.08	14.71	16.76	19.65	20.17
Wnt5b	Endogenous	mRNA	87.91	79.4	98.48	81.53	87.79	81.12	99.73	92.45	143.74	111.59	127.85	92.97	90.06	120.06	103.25	118.48	100.87	119.67	76.6	108.07	84.94
Wnt7b	Endogenous	mRNA	786.88	750.23	665.77	646.52	829.01	596.09	756.38	656.2	717.44	581.5	751.5	649.67	672.98	703.89	477.75	833.94	782.39	742.57	791.13	652.36	638.11
Xcl1	Endogenous	mRNA	67.9	120.47	147.02	107.62	92.31	76.72	161.36	115.56	166.04	188.37	116.93	102.81	108.83	102.63	47.25	108.12	65.43	200.11	150.81	91.37	122.1
Zap70	Endogenous	mRNA	34.31	65.71	101.25	68.48	53.4	59.96	56.03	53.26	110.28	86	56.13	39.37	117.58	116.19	167.12	90.87	62.7	105.94	149.61	84.49	62.64
Zc3h12a	Endogenous	mRNA	939.82	1149.98	1328.76	1381.91	1362.07	782.15	914.38	969.73	1108.99	1001.24	1088.27	553.43	1080.76	1263.51	1314.25	1455.08	1358.95	1136.9	1239.95	1242.82	1428.06
Zeb1	Endogenous	mRNA	738.99	533.92	509.04	484.28	516.77	552	479.6	481.35	417.58	544.64	484.89	596.08	567.9	594.48	547.75	600.44	598.38	511.07	563.72	516.78	639.17
Zeb2	Endogenous	mRNA	452.4	364.16	464.65	559.29	410.88	364.18	293.59	392.92	297.38	328.63	372.63	332.49	545.39	541.23	810.25	415.24	438.9	596.41	515.85	474.53	424.7
Abcf1	Housekeeping	mRNA	1645.94	1567.99	1586.75	1464.26	1617.29	1612.8	1513.88	1607.84	1556.31	1687.17	1404.78	1788.24	2066.46	2007.1	1763.12	1612.66	1827.84	1875.54	1715.11	1796.93	1865.5
Dnajc14	Housekeeping	mRNA	644.65	689.99	646.35	611.47	691.44	696.62	559.16	602.94	619.55	619.38	598.71	709.83	730.52	759.08	676.37	645.3	740.13	737.66	695.38	673.97	789.94
Ercc3	Housekeeping	mRNA	336.62	363.25	321.79	334.27	314.95	349.19	327.2	350.71	343.23	406.44	277.53	349.99	426.55	416.33	363.12	360.03	370.75	401.2	378.21	344.85	394.97
G6pdx	Housekeeping	mRNA	2985.99	3253.72	3435.64	3612.54	2977.54	3207.96	4094.53	4461.75	4325.7	3542.24	4242.39	3403.68	3900.26	3850.57	3656.62	4809.24	5078.7	5944.45	5096.26	4947.69	4563.41
Gusb	Housekeeping	mRNA	946.26	1117.13	991.72	1131.62	1162.96	1087.25	1036.52	1038.06	918.17	953.13	824.78	1359.5	1193.34	1103.76	1225	978.87	1000.47	1136.9	1017.34	926.46	1023.53
Mrpl19	Housekeeping	mRNA	62.18	56.59	58.25	67.67	57.92	62.61	67.23	60.29	64.43	71.66	70.16	86.4	62.54	76.49	72.62	69.02	85.87	82.4	76.6	82.53	76.45
Nrde2	Housekeeping	mRNA	206.55	135.99	196.96	167.13	184.63	170.19	172.57	140.69	127.63	166.87	165.27	155.31	193.89	202.36	178.5	179.44	170.38	187.36	193.89	194.53	176.25
Oaz1	Housekeeping	mRNA	7936.68	11241.5	8754.86	10072.1	10105.5	9527.77	12885.3	10286.1	9922.71	7628.09	9789.78	10763.4	10453.6	9281.26	7861.86	10595	10642.6	10192.9	9931.59	8982.68	9191.59
Polr2a	Housekeeping	mRNA	3056.03	2432.31	3063.92	3032.05	2426.38	2814.68	2259.05	2707.2	2551.31	2359.78	2528.91	2330.73	3471.21	3768.27	4243.74	3121.8	2882.84	4019.86	4132.78	4149.93	3338.15
Psmc4	Housekeeping	mRNA	2164.09	2286.28	2147.1	2235.52	2277.05	2011.37	2419.29	2252.98	2397.66	1865.3	2411.97	2369.01	2305.38	2429.24	1883.87	2460.41	2578.88	2486.66	2275.24	2292.09	2107.58
Pum1	Housekeeping	mRNA	1466.55	1076.06	1169.26	958.78	1092.37	930.29	896.45	958.67	1262.64	1355.47	1043.06	878.26	1179.58	1296.43	1331.75	1420.57	1553.87	1136.9	1336.9	1498.26	1425.93
Sdha	Housekeeping	mRNA	2709.41	3389.71	2735.2	3181.25	2845.41	3151.53	2615.39	2458.99	2206.84	1884.76	2340.25	3079.93	2967.1	3339.36	3088.74	2759.47	2566.61	3279.26	2971.82	2684.09	2677.74
Sf3a1	Housekeeping	mRNA	102.92	80.32	102.64	109.25	85.98	74.07	93.01	107.52	91.69	126.95	106.02	72.19	173.87	131.68	189.87	126.53	151.3	121.64	136.44	139.51	140.15
Stk11ip	Housekeeping	mRNA	186.54	158.81	183.09	177.73	177.39	181.65	160.24	139.68	171	210.9	173.06	161.87	226.41	198.48	204.75	177.14	174.47	189.32	189.1	167.02	186.87
Tbc1d10b	Housekeeping	mRNA	293.02	262.85	306.53	298.4	281.46	340.37	242.04	264.29	301.1	262.08	285.32	292.02	313.97	341.78	334.25	334.73	342.12	305.07	335.12	295.72	300.48
Tbp	Housekeeping	mRNA	456.69	488.29	477.13	439.44	435.32	453.24	435.9	416.03	515.47	475.03	509.84	480.15	450.32	423.11	364	522.22	489.33	349.21	378.21	420.5	439.57
Tfrc	Housekeeping	mRNA	1238.56	2581.99	1273.28	1578.4	2288.82	1879.98	2603.06	2093.2	1914.41	1259.23	2040.9	1530.12	1835.05	2018.72	1457.75	2284.42	1789.68	1764.7	2476.32	2348.09	1979.11
Tlk2	Housekeeping	mRNA	37.88	29.21	30.51	26.09	29.87	31.74	41.46	47.23	44.61	64.5	35.86	32.81	38.78	32.92	91.87	67.87	59.97	51.99	37.1	62.88	74.32
Tmub2	Housekeeping	mRNA	323.04	304.84	319.01	345.68	361.11	353.6	270.06	306.49	283.75	243.66	307.15	366.4	362.76	397.93	336.87	318.62	269.88	315.86	342.3	271.16	317.46
Ubb	Housekeeping	mRNA	73.61	82.14	95.7	74.19	74.21	76.72	75.08	78.38	71.87	79.85	93.55	57.97	91.31	91.01	100.62	103.52	92.69	89.26	105.32	113.97	95.56
NEG_A	Negative	SYSTEM	24	16	19	19	21	24	25	26	15	30	21	23	28	18	20	16	21	20	16	13	16
NEG_B	Negative	SYSTEM	21	18	22	16	16	19	10	20	13	21	13	16	14	11	14	21	12	19	13	9	15
NEG_C	Negative	SYSTEM	22	26	17	14	20	18	22	15	17	11	15	18	8	13	18	11	11	19	11	14	19
NEG_D	Negative	SYSTEM	27	12	15	25	17	19	17	21	13	16	11	16	15	17	21	20	14	21	22	18	19
NEG_E	Negative	SYSTEM	37	25	25	22	26	24	28	28	23	25	28	25	24	22	18	25	23	21	19	13	10
NEG_F	Negative	SYSTEM	44	39	31	37	37	26	27	34	26	29	31	28	27	25	28	28	22	26	25	14	23
NEG_G	Negative	SYSTEM	41	46	27	51	58	34	24	34	41	30	23	34	23	44	39	40	26	39	36	25	30
NEG_H	Negative	SYSTEM	36	23	17	11	37	21	16	19	18	17	16	24	8	16	25	28	26	20	15	15	19
POS_A	Positive	SYSTEM	79938	83999	77008	67438	81679	63867	81895	84251	69654	74907	77113	78029	66401	58722	56231	74674	67084	59879	63530	59032	59882
POS_B	Positive	SYSTEM	20666	22340	21040	18734	21099	17237	21415	21876	19264	20454	21007	20154	17412	16829	15258	20787	18622	16941	17738	16540	16641
POS_C	Positive	SYSTEM	5010	5418	5029	4595	5162	4206	5107	5261	4701	4867	5023	4738	4309	4042	3739	5039	4616	4024	4339	3856	4116
POS_D	Positive	SYSTEM	1061	1174	1072	970	1205	904	1120	1207	986	1072	1086	1041	945	942	835	1104	972	911	986	856	920
POS_E	Positive	SYSTEM	231	238	189	191	211	210	227	227	169	207	194	210	203	177	162	230	193	147	166	144	179
POS_F	Positive	SYSTEM	117	170	127	99	136	99	144	130	118	127	126	132	99	106	93	126	96	103	94	69	79
